# Supplementary material for: Differential basal expression of immune genes confers Crassostrea gigas resistance to Pacific oyster mortality syndrome
Source: BMC Genomics. 2020 Jan 20;21:63. doi: 10.1186/s12864-020-6471-x (PMC6971885; doi:10.1186/s12864-020-6471-x)
Supplement: Supplementary file 2 — Additional file 2. List of DEGs shared by at least two resistant families. This table presents the Log2 fold change of each CGI differentially expressed (significant) in the three resistant oyster families (RF21, RF23 and RF48) compared to the three susceptible families (SF11, SF14 and SF15), the Blast results, the enriched functional categories and details of each comparison (Log2 fold change, p-value and number of reads). [file 12864_2020_6471_MOESM2_ESM.xlsx]

## Sheet: Feuil1
	Significant RF21	Significant RF23	Significant RF48					RF21										RF23										RF48
N° CGI	Mean_Log2_Fold change	Mean_Log2_Fold change	Mean_Log2_Fold change	Mean_Log2 fold chande	Blast	MeanSimilarity	Enrichment	Log2_Fold change_RF21 vs SF11	pvalue_RF21 vs SF11	Reads RF21 vs SF11	Log2_Fold change_RF21 vs SF14	pvalue_RF21 vs SF14	Reads RF21 vs SF14	Log2_Fold change_RF21 vs SF15	pvalue_RF21 vs SF15	Reads RF21 vs SF15	Mean_Log2_Fold change_RF21	Log2_Fold change_RF23 vs SF11	pvalue_RF23 vs SF11	Reads_RF23 vs SF11	Log2_Fold change_RF23 vs SF14	pvalue_RF23 vs SF14	Reads_RF23 vs SF14	Log2_Fold change_RF23 vs SF15	pvalue_RF23 vs SF15	Reads_RF23 vs SF15	Mean_Log2_Fold change_RF23	Log2_Fold change_RF48 vs SF11	pvalue_RF48 vs SF11	Reads_RF48 vs SF11	Log2_Fold change_RF48 vs SF14	pvalue_RF48 vs SF14	Reads_RF48 vs SF14	Log2_Fold change_RF48 vs SF15	pvalue_RF48 vs SF15	Reads_RF48 vs SF15	Mean_Log2_Fold change_RF48
CGI_10019719	2.31376	1.38531	1.52563	1.74157	Toll-like receptor 2	0.7305	defense response ; response to stress	2.70154	6.8163e-28	34.241	2.04085	3.39105e-17	38.4558	2.1989	1.7126e-22	37.0488	2.31376	1.77964	2.81125e-11	18.9182	1.10977	4.55329e-05	22.4212	1.26653	3.41224e-07	21.3721	1.38531	1.91472	1.78986e-12	21.634	1.24756	7.91289e-06	25.3821	1.41459	2.29182e-08	24.2394	1.52563
CGI_10005194	0.535427	0.681432	0.750511	0.65579	Toll-like receptor 13	0.617	defense response ; response to stress	0.36236	0.0418873	133.028	0.412632	0.0319547	136.1	0.83129	2.65382e-07	118.949	0.535427	0.508635	0.000660407	137.57	0.554486	0.000967103	140.901	0.981176	3.94276e-12	124.185	0.681432	0.579859	0.00240572	149.912	0.626145	0.00194144	153.54	1.04553	6.74718e-09	135.793	0.750511
CGI_10012829	0.336806	0.456953	0.271034	0.354931	PX domain-containing kinase	0.7695	defense response ; response to stress	0.352625	2.16232e-06	533.38	0.354293	9.2129e-05	554.364	0.3035	6.76932e-06	552.542	0.336806	0.47292	5.65783e-11	544.873	0.471462	9.01676e-08	566.405	0.426479	4.4377e-11	564.476	0.456953	0.28738	0.000429022	533.214	0.28585	0.00344216	554.086	0.239873	0.00134744	552.612	0.271034
CGI_10014490	-1.06938	-0.633829	-0.598673	-0.767293	fibrinogen 1 [Crassostrea gigas]	0.7555	defense response ; response to stress	-1.07994	6.81504e-13	116.973	-0.835468	4.08135e-07	108.566	-1.29272	3.41238e-20	132.166	-1.06938	-0.645493	2.18266e-06	126.978	-0.402147	0.0114837	119.378	-0.853847	6.51257e-12	142.081	-0.633829	-0.609248	3.62559e-08	135.278	-0.364687	0.00517623	127.292	-0.822083	5.68151e-16	151.128	-0.598673
CGI_10014318	-1.93785	-0.62746	-1.28557	-1.28363	Fibrinogen A	0.763	defense response ; response to stress	-2.04752	1.05225e-30	446.558	-2.05784	1.07393e-37	461.855	-1.70819	4.84586e-27	371.016	-1.93785	-0.747879	7.75792e-06	560.885	-0.745707	3.293e-07	581.129	-0.388794	0.01149	490.121	-0.62746	-1.39975	3.81441e-17	509.038	-1.40664	4.70725e-22	526.943	-1.05033	6.13001e-13	432.517	-1.28557
CGI_10014165	3.03721	3.76328	NS	3.40024	hypothetical protein CGI_10014165	0.698	defense response ; response to stress	2.91609	5.06985e-15	17.9043	2.61644	2.69132e-13	19.3071	3.5791	1.46014e-19	17.5603	3.03721	3.68673	3.02732e-30	28.9908	3.35408	8.82313e-29	30.8085	4.24903	5.5341e-35	28.9391	3.76328	NS	NS	NS	NS	NS	NS	NS	NS	NS	NS
CGI_10028317	2.88153	3.19123	NS	3.03638	microfibril-associated glyco 4-like	0.8075	defense response ; response to stress	3.7097	6.53508e-86	89.9941	3.34077	2.3344e-84	95.6138	1.5941	1.3776e-39	114.011	2.88153	3.99615	4.55659e-83	112.158	3.63293	3.62883e-80	118.551	1.94459	2.68682e-41	136.19	3.19123	1.50389	3.16714e-08	24.1822	1.13905	1.22573e-05	27.1598	-0.574911	0.0039734	47.3982	0.689343
CGI_10020018	3.89299	2.09742	NS	2.99521	fibrinogen 1	0.748	defense response ; response to stress	3.39858	1.58427e-35	49.1717	3.96539	4.93162e-41	49.8193	4.31499	4.6599e-43	48.255	3.89299	1.63478	1.10069e-06	15.4941	2.15275	5.79051e-10	14.7838	2.50475	2.49598e-12	13.928	2.09742	NS	NS	NS	NS	NS	NS	NS	NS	NS	NS
CGI_10026877	2.12968	2.37969	NS	2.25469	Fibrinogen C domain-containing 1	0.748	defense response ; response to stress	2.5502	2.705e-09	6.26849	1.30898	0.000690496	8.20824	2.52986	4.77434e-09	6.46727	2.12968	2.78128	1.25872e-11	8.45773	1.63679	9.84448e-06	10.4378	2.721	1.57925e-11	8.71231	2.37969	NS	NS	NS	-1.19243	0.0151945	2.57727	NS	NS	NS	NS
CGI_10014025	2.73852	1.62758	NS	2.18305	microfibril-associated glyco 4-like	0.8075	defense response ; response to stress	1.65539	5.48253e-14	83.2419	2.67257	2.11339e-25	75.7752	3.88759	2.33193e-40	68.6555	2.73852	0.53057	0.0192478	45.7394	1.55843	9.18444e-10	37.0124	2.79374	4.47099e-22	30.875	1.62758	NS	NS	NS	1.14034	5.44491e-07	30.2332	2.46686	4.45658e-20	23.9157	NS
CGI_10014022	1.0638	0.5801	NS	0.82195	microfibril-associated glyco 4-like	0.762	defense response ; response to stress	0.782649	9.76016e-07	314.669	1.25864	1.59336e-14	292.939	1.15011	6.71359e-14	294.175	1.0638	0.298089	0.0474061	249.072	0.773568	1.17954e-07	225.605	0.668643	6.11266e-07	228.216	0.5801	-0.598107	7.26042e-05	194.178	NS	NS	NS	NS	NS	NS	NS
CGI_10000136	0.65595	0.557253	NS	0.606601	ETS-related transcription factor Elf-3	0.9395	defense response ; response to stress	0.727023	8.40702e-12	298.031	0.649718	1.25848e-10	316.556	0.591109	2.73298e-07	315.328	0.65595	0.628695	2.48156e-09	278.154	0.547972	4.77951e-08	295.724	0.495093	1.97166e-05	295.028	0.557253	-1.51571	2.399e-13	152.181	-1.60311	8.8889e-16	165.058	-1.64842	1.08459e-15	166.757	-1.58908
CGI_10008223	0.364843	0.402492	NS	0.383668	slit homolog 3	0.454	defense response ; response to stress	0.281444	0.00723296	565.418	0.359271	0.000211125	574.322	0.453815	2.31411e-05	547.365	0.364843	0.319096	0.000607466	558.432	0.394353	5.52706e-06	567.511	0.494027	4.87603e-07	541.501	0.402492	NS	NS	NS	NS	NS	NS	NS	NS	NS	NS
CGI_10015396	-0.216132	-0.255485	NS	-0.235809	Toll interacting [Homo sapiens]	0.7605	defense response ; response to stress	-0.281039	0.00100732	1484.81	-0.193442	0.0158537	1494.67	-0.173916	0.0448144	1455.02	-0.216132	-0.320153	7.20963e-06	1427.99	-0.235365	0.000132475	1437.21	-0.210938	0.00174441	1399.29	-0.255485	NS	NS	NS	NS	NS	NS	NS	NS	NS	NS
CGI_10023242	-0.545223	-0.599278	NS	-0.57225	leucine-rich repeat-containing 15-like [Crassostrea gigas]	0.735	defense response ; response to stress	-0.548333	4.41958e-14	702.966	-0.704341	4.20287e-32	781.121	-0.382995	1.62163e-11	670.453	-0.545223	-0.60236	3.02125e-13	673.668	-0.760711	1.65878e-27	749.624	-0.434763	2.36871e-10	642.107	-0.599278	0.216992	0.0179794	926.885	NS	NS	NS	0.385853	5.48742e-08	897.84	NS
CGI_10017371	-0.850444	-0.97865	NS	-0.914547	laccase-like isoform X2	0.6765	defense response ; response to stress	-0.736037	0.00564609	19.0536	-0.895344	0.000206344	21.3765	-0.919952	0.00197782	21.5083	-0.850444	-0.872277	0.0136379	17.4127	-1.03373	0.00127119	19.6375	-1.02994	0.0046303	19.7864	-0.97865	NS	NS	NS	-0.601572	0.0146404	23.67	-0.633798	0.0381303	23.7644	NS
CGI_10003063	-1.15721	-0.912654	NS	-1.03493	microfibril-associated glyco 4-like	0.8025	defense response ; response to stress	-1.05213	1.37056e-10	117.561	-1.69342	1.6165e-58	167.861	-0.726086	4.05091e-06	102.523	-1.15721	-0.811024	3.37293e-05	120.999	-1.44401	3.14091e-25	170.35	-0.482926	0.0153209	106.564	-0.912654	0.730337	2.19474e-06	219.98	NS	NS	NS	1.06881	1.72342e-14	206.622	NS
CGI_10028910	-0.943687	-1.34379	NS	-1.14374	Fibrinogen A	0.9075	defense response ; response to stress	-0.847792	4.16723e-08	186.507	-1.15631	0.00466284	255.122	-0.826957	1.89388e-13	187.182	-0.943687	-1.29012	2.61738e-14	163.832	-1.46581	0.000186118	230.165	-1.27545	9.42918e-22	164.171	-1.34379	0.539792	0.000723588	305.417	NS	NS	NS	0.582123	8.74863e-07	308.444	NS
CGI_10009440	-1.29113	-1.21621	NS	-1.25367	fibrinogen A	0.773	defense response ; response to stress	-0.986669	2.28455e-17	158.863	-1.80661	1.72934e-24	257.185	-1.08011	8.25019e-22	169.302	-1.29113	-0.918597	3.16686e-08	156.59	-1.72217	1.93858e-17	252.554	-1.00787	2.69554e-10	166.827	-1.21621	NS	NS	NS	-0.571984	0.00590665	344.363	NS	NS	NS	NS
CGI_10008742	-1.59768	-1.03736	NS	-1.31752	ryncolin-1-like isoform X1	0.8235	defense response ; response to stress	-2.11258	5.21774e-09	53.9224	-1.25874	0.000356261	29.8107	-1.42171	5.28307e-05	32.463	-1.59768	-1.61523	8.50428e-08	57.5146	-0.66104	0.0158196	34.2563	-0.835797	0.00208163	36.7286	-1.03736	NS	NS	NS	1.31482	5.77696e-10	81.6317	1.12268	5.75513e-07	83.4295	NS
CGI_10002665	-1.71347	-1.29798	NS	-1.50573	Tenascin- partial	0.7585	defense response ; response to stress	-0.986629	2.45006e-07	147.793	-2.42389	1.95285e-23	360.778	-1.7299	7.50077e-25	220.906	-1.71347	-0.566828	0.000803021	160.887	-2.0184	1.85575e-19	369.166	-1.3087	2.32324e-21	232.431	-1.29798	NS	NS	NS	-1.41315	3.09092e-10	429.899	-0.662185	1.22037e-06	285.124	NS
CGI_10000212	-1.23834	-2.12904	NS	-1.68369	microfibril-associated glyco 4-like	0.8335	defense response ; response to stress	-1.56112	9.40913e-10	49.7011	-1.10523	0.00200781	41.9011	-1.04865	4.53285e-07	37.518	-1.23834	-2.54415	9.36613e-12	40.6098	-1.66828	0.000275692	32.7458	-2.17469	9.49789e-10	28.597	-2.12904	0.547705	0.0355863	97.8067	0.861371	0.0119367	91.6887	1.14169	6.81722e-10	86.2945	0.850256
CGI_10007881	-3.42678	-3.19504	NS	-3.31091	laccase-like [Octopus bimaculoides]	0.76	defense response ; response to stress	-2.59544	2.104e-08	5.61798	-4.64367	1.90582e-30	21.2609	-3.04124	2.7617e-11	5.58933	-3.42678	-2.43378	5.75642e-08	5.46747	-4.37615	2.09136e-30	20.717	-2.7752	1.18749e-10	5.4395	-3.19504	NS	NS	NS	-1.9402	1.55357e-13	26.7887	NS	NS	NS	NS
CGI_10003902	2.36521	NS	1.12135	1.74328	Ficolin-2	0.798	defense response ; response to stress	2.32513	3.56879e-11	10.6274	2.24602	1.60569e-11	11.2914	2.52449	2.56205e-12	10.6476	2.36521	NS	NS	NS	NS	NS	NS	NS	NS	NS	NS	1.09008	0.0143179	5.16333	1.01483	0.0157895	5.60759	1.25915	0.00529153	5.06779	1.12135
CGI_10028905	0.887347	NS	1.01484	0.951093	toll-like receptor 4 [Crassostrea gigas]	0.7445	defense response ; response to stress	0.695965	0.000543251	49.4098	1.09747	7.51131e-09	46.5713	0.868604	1.07918e-05	48.136	0.887347	NS	NS	NS	0.603919	0.00360079	36.3064	NS	NS	NS	NS	0.825591	0.000201296	54.0119	1.21871	8.06636e-09	51.2083	1.00022	4.33079e-06	52.7889	1.01484
CGI_10025473	0.798376	NS	0.939452	0.868914	microfibril-associated glyco 4-like	0.803	defense response ; response to stress	0.795867	4.30293e-05	67.2198	0.684565	0.00173473	71.8589	0.914698	1.34237e-07	66.6552	0.798376	-0.550769	0.0340756	39.0376	-0.648881	0.0176878	42.4976	NS	NS	NS	NS	0.936916	2.04134e-06	73.9324	0.822568	0.000150731	78.8398	1.05887	2.42652e-09	73.4561	0.939452
CGI_10009076	0.21386	NS	0.18123	0.197545	AAEL001467- partial [Aedes aegypti]	0.5995	defense response ; response to stress	0.195607	0.0020712	1094.37	0.26821	5.45515e-05	1112.79	0.177764	0.0131043	1123.57	0.21386	NS	NS	NS	NS	NS	NS	NS	NS	NS	NS	0.163529	0.0128897	1108.64	0.232673	0.00063114	1126.77	0.147489	0.0424257	1138.29	0.18123
CGI_10013123	-0.734576	NS	-0.61951	-0.677043	laccase-3-like isoform X1	0.5785	defense response ; response to stress	-0.848266	7.17575e-10	261.241	-0.603609	9.68601e-08	243.164	-0.751853	3.41511e-08	254.74	-0.734576	NS	NS	NS	NS	NS	NS	NS	NS	NS	NS	-0.732356	1.06896e-06	275.59	-0.491353	0.000180588	257.444	-0.63482	2.03064e-05	269.064	-0.61951
CGI_10009488	-0.631771	NS	-0.959559	-0.795665	mantle defensin [Crassostrea gigas]	0.793	defense response ; response to stress	-0.38062	0.0187299	471.513	-0.780016	5.44618e-09	580.8	-0.734676	2.64861e-05	560.332	-0.631771	NS	NS	NS	-0.354753	0.0451454	637.769	NS	NS	NS	NS	-0.708789	4.16827e-06	439.369	-1.11237	1.34436e-16	549.871	-1.05752	9.24309e-10	529.479	-0.959559
CGI_10011915	NS	2.76879	1.91694	2.34287	tyrosinase tyr-3	0.6583	defense response ; response to stress	NS	NS	NS	NS	NS	NS	1.62843	2.87757e-05	38.8348	NS	2.53705	2.21488e-44	121.918	2.15079	1.2008e-07	122.606	3.61853	3.2578e-69	115.02	2.76879	1.60793	3.05665e-09	78.0408	1.49875	0.000791163	76.74	2.64415	2.85377e-20	69.6383	1.91694
CGI_10014276	NS	0.664976	1.12046	0.892718	laccase-like [Octopus bimaculoides]	0.7355	defense response ; response to stress	0.435242	0.00749137	332.637	NS	NS	NS	NS	NS	NS	NS	0.821384	0.00165264	391.805	0.655211	0.0140635	426.531	0.518334	0.0475413	437.174	0.664976	1.28134	8.38014e-12	510.283	1.10981	2.4905e-09	550.356	0.970229	1.58813e-08	559.48	1.12046
CGI_10010018	NS	0.605269	0.894032	0.749651	microfibril-associated glyco 4-like	0.7295	defense response ; response to stress	-0.633231	6.02968e-07	138.904	-0.703935	1.41359e-06	148.975	NS	NS	NS	NS	0.488846	0.00179195	199.568	0.412559	0.0187942	211.997	0.914402	2.66126e-08	181.378	0.605269	0.778566	7.68045e-12	237.09	0.697654	1.49336e-07	251.157	1.20588	7.93217e-20	218.347	0.894032
CGI_10027833	NS	-0.33799	-0.219144	-0.278567	RING finger and transmembrane domain-containing 2-like [Crassostrea gigas]	0.7205	defense response ; response to stress	0.187125	0.00370793	878.336	NS	NS	NS	NS	NS	NS	NS	-0.283268	4.45915e-05	727.531	-0.358152	1.43704e-07	778.562	-0.372551	1.59443e-08	769.694	-0.33799	-0.163615	0.00665864	796.339	-0.239688	4.07925e-05	851.03	-0.254129	4.15296e-06	840.832	-0.219144
CGI_10011310	NS	-0.687802	-1.48041	-1.08411	microfibril-associated glyco 4-like	0.747	defense response ; response to stress	NS	NS	NS	0.645507	4.13911e-05	977.022	NS	NS	NS	NS	-1.01371	3.46762e-11	840.057	-0.361719	0.0196525	653.546	-0.687975	2.46701e-07	736.363	-0.687802	-1.80352	1.19881e-44	761.812	-1.15274	2.5405e-25	560.33	-1.48499	1.41256e-50	649.516	-1.48041
CGI_10025439	3.18366	2.79047	3.53005	3.16806	Scavenger receptor	0.7815	defense response to other organism ; response to external stimulus ; defense response ; response to stress	0.964529	0.000155921	29.0617	3.99693	3.66132e-27	20.8062	4.58952	5.10023e-30	19.9557	3.18366	0.620726	0.0169431	23.9671	3.59777	4.59959e-24	15.7447	4.15291	2.82803e-27	15.0441	2.79047	1.65378	4.11783e-07	47.3612	4.17689	1.46791e-26	39.5782	4.75946	3.8328e-32	38.4208	3.53005
CGI_10000661	1.68194	1.82858	2.14605	1.88552	interferon-induced 44-like [Crassostrea gigas]	0.742	defense response to other organism ; response to external stimulus ; defense response ; response to stress	1.97085	4.91652e-29	172.573	1.90026	1.47662e-11	178.447	1.17472	1.89235e-10	202.731	1.68194	2.13687	7.29148e-63	181.136	2.02576	2.06208e-15	187.267	1.32309	2.54057e-22	210.886	1.82858	2.44613	2.87225e-43	236.49	2.33556	2.04736e-17	244.736	1.65647	1.21057e-19	268.682	2.14605
CGI_10024230	2.3289	1.97957	0.962696	1.75706	C1q-domain-containing partial	0.6535	defense response to other organism ; response to external stimulus ; defense response ; response to stress	1.98467	2.70329e-20	130.761	2.74897	2.1201e-39	125.24	2.25306	7.60398e-26	129.019	2.3289	1.64184	3.95256e-16	103.829	2.39379	5.6033e-35	97.3986	1.90309	2.1993e-21	101.75	1.97957	0.636733	0.0401754	66.414	1.35748	1.2172e-06	57.9097	0.893877	0.00251907	63.2191	0.962696
CGI_10009290	1.27123	1.51401	1.58311	1.45611	perlucin-like isoform X3	0.5705	defense response to other organism ; response to external stimulus ; defense response ; response to stress	0.74175	0.000800084	1275.39	0.776285	0.000169821	1318	2.29565	8.08376e-33	979.25	1.27123	0.987342	1.93461e-06	1396.76	1.01812	1.40228e-07	1444.08	2.53656	4.6585e-43	1113	1.51401	1.03957	7.59044e-12	1488.83	1.07214	3.91789e-16	1538.76	2.63761	6.57586e-96	1188.95	1.58311
CGI_10013769	1.33157	0.512541	2.01037	1.28483	Scavenger receptor	0.819	defense response to other organism ; response to external stimulus ; defense response ; response to stress	1.19528	5.62348e-13	511.356	1.37529	2.73743e-35	515.865	1.42414	1.36798e-33	500.722	1.33157	0.386685	0.0499913	344.156	0.547882	1.50335e-05	342.266	0.603056	5.95378e-06	330.874	0.512541	1.86514	6.53044e-31	752.869	2.05631	4.44594e-79	766.087	2.10966	2.98038e-74	746.835	2.01037
CGI_10018214	1.49753	0.932831	0.769552	1.06664	C1q-related factor-like	0.5655	defense response to other organism ; response to external stimulus ; defense response ; response to stress	1.35841	9.45024e-19	282.037	1.70391	7.96446e-15	273.518	1.43027	1.9139e-25	284.08	1.49753	0.793873	2.92691e-05	209.653	1.1409	2.42364e-06	198.678	0.86372	6.87284e-07	210.529	0.932831	0.627194	0.000758265	204.397	0.984499	4.59747e-05	192.101	0.696963	3.20161e-05	204.773	0.769552
CGI_10023866	0.885921	0.882555	1.34174	1.03674	Scavenger receptor	0.65	defense response to other organism ; response to external stimulus ; defense response ; response to stress	0.473552	0.000265987	200.427	1.79251	1.68404e-14	153.597	0.3917	0.0340925	208.981	0.885921	0.476981	0.000858223	195.72	1.77278	4.63124e-14	150.109	0.397899	0.0389133	204.228	0.882555	0.943885	3.2935e-10	253.92	2.22099	1.34053e-20	207.688	0.860341	3.7633e-06	263.715	1.34174
CGI_10022882	0.630597	0.307092	0.316439	0.418043	HD domain-containing	0.734	defense response to other organism ; response to external stimulus ; defense response ; response to stress	0.568897	4.38137e-16	620.444	0.693771	2.40714e-26	623.87	0.629123	3.45426e-23	622.545	0.630597	0.245622	0.0151307	531.163	0.367335	6.898e-05	531.63	0.30832	0.00074917	532.129	0.307092	0.255765	0.0309768	561.736	0.376196	0.000582825	562.118	0.317358	0.0035346	562.391	0.316439
CGI_10011837	-0.913328	-0.479909	-1.18872	-0.860651	complement C1q tumor necrosis factor-related 4	0.64	defense response to other organism ; response to external stimulus ; defense response ; response to stress	-0.948851	7.24449e-10	192.911	-0.892467	4.19775e-15	194.477	-0.898665	5.92203e-08	192.193	-0.913328	-0.51707	0.0170694	209.891	-0.458702	0.0169818	212.383	-0.463954	0.039653	209.751	-0.479909	-1.22128	1.31256e-13	185.581	-1.17527	2.92628e-20	186.771	-1.16959	2.27191e-11	184.576	-1.18872
CGI_10011836	-1.22289	-1.00395	-0.8342	-1.02034	Complement C1q tumor necrosis factor-related 5	0.6405	defense response to other organism ; response to external stimulus ; defense response ; response to stress	-1.21598	3.72111e-14	67.9815	-1.39339	1.78543e-12	78.4426	-1.05929	1.247e-09	64.3562	-1.22289	-0.997356	7.98879e-08	69.2527	-1.17561	3.98501e-08	79.5933	-0.838877	2.53329e-05	65.8063	-1.00395	-0.822064	4.45904e-06	76.0334	-1.01173	1.27122e-06	87.0295	-0.668809	0.000541726	72.4331	-0.8342
CGI_10026921	-0.957849	-1.37026	-0.884854	-1.07099	macrophage mannose receptor 1-like	1	defense response to other organism ; response to external stimulus ; defense response ; response to stress	-1.1929	9.89473e-10	47.5859	-0.967411	1.67732e-08	44.0827	-0.713233	0.00918576	38.9192	-0.957849	-1.59957	3.63155e-10	42.145	-1.39978	1.50632e-09	38.5914	-1.11145	0.00041611	33.6458	-1.37026	-1.11793	1.70858e-08	49.5682	-0.898124	2.22131e-07	46.0254	-0.638505	0.0207261	40.698	-0.884854
CGI_10005511	-1.27741	-0.712817	-1.54694	-1.17906	C-type lectin mannose-binding isoform-like	0.7065	defense response to other organism ; response to external stimulus ; defense response ; response to stress	-1.09827	5.53176e-06	168.881	-1.61091	2.56365e-14	228.76	-1.12305	3.47882e-05	176.157	-1.27741	-0.52997	0.00270943	192.082	-1.05101	1.12207e-16	251.602	-0.557472	0.0137205	199.768	-0.712817	-1.36366	7.69809e-15	164.934	-1.89936	6.74785e-45	226.065	-1.3778	3.08808e-10	172.129	-1.54694
CGI_10014944	-1.53627	-1.45881	-1.19909	-1.39805	Complement C1q 4	0.71	defense response to other organism ; response to external stimulus ; defense response ; response to stress	-1.42285	2.39371e-07	50.8008	-1.7593	4.35918e-12	63.219	-1.42665	2.40198e-08	51.1278	-1.53627	-1.35177	1.89818e-10	50.557	-1.68493	6.68911e-19	62.7271	-1.33972	6.87179e-13	50.9018	-1.45881	-1.09298	4.94098e-09	56.4532	-1.42767	5.77602e-18	69.3814	-1.07662	2.28349e-11	56.8493	-1.19909
CGI_10004625	-1.45966	-1.15432	-1.6849	-1.43296	Complement C1q 4	0.7285	defense response to other organism ; response to external stimulus ; defense response ; response to stress	-2.14231	1.36537e-28	296.151	-1.46311	7.96583e-16	207.097	-0.773555	8.25878e-09	143.022	-1.45966	-1.83783	4.42089e-21	300.304	-1.15881	4.6724e-10	214.254	-0.46633	0.00165172	151.583	-1.15432	-2.357	1.19598e-31	295.243	-1.69014	5.5248e-19	203.721	-1.00756	5.9194e-12	138.055	-1.6849
CGI_10009275	-2.45273	-2.03415	-0.951215	-1.8127	Multimerin-2 [Crassostrea gigas]	0.701	defense response to other organism ; response to external stimulus ; defense response ; response to stress	-2.38574	4.40797e-08	5.25706	-2.62771	4.3385e-09	7.23482	-2.34475	1.22217e-07	4.74694	-2.45273	-1.99634	1.85453e-06	5.35912	-2.21954	1.02855e-07	7.30155	-1.88657	5.72243e-06	4.86845	-2.03415	-0.883427	0.0193317	7.42096	-1.21965	0.00150302	9.53687	-0.750569	0.0486937	6.93906	-0.951215
CGI_10012890	-2.84779	-1.38481	-1.83289	-2.02183	Complement C1q 4	0.735	defense response to other organism ; response to external stimulus ; defense response ; response to stress	-3.05817	1.18685e-39	43.3539	-2.52544	2.55603e-22	32.3308	-2.95977	1.10199e-28	43.0874	-2.84779	-1.58715	9.05367e-18	50.4099	-1.05564	1.40758e-06	40.0334	-1.51163	1.57895e-11	50.3187	-1.38481	-2.03692	3.35626e-25	49.4245	-1.50525	5.07744e-11	38.3505	-1.95651	2.01683e-16	49.2432	-1.83289
CGI_10001429	-2.12691	-1.9527	-2.07177	-2.05046	Complement C1q 2	0.803	defense response to other organism ; response to external stimulus ; defense response ; response to stress	-2.71659	1.02442e-34	88.6501	-1.75345	6.40785e-19	49.5635	-1.91068	2.30002e-22	53.4322	-2.12691	-2.52233	1.55422e-20	86.7767	-1.59279	2.05372e-09	48.7727	-1.74299	2.40665e-11	52.4918	-1.9527	-2.64972	3.25534e-28	90.8801	-1.70524	2.04893e-14	50.8524	-1.86034	3.68842e-17	54.7633	-2.07177
CGI_10008370	-2.5844	-2.41063	-1.33153	-2.10885	hemagglutinin amebocyte aggregation factor-like	0.7815	defense response to other organism ; response to external stimulus ; defense response ; response to stress	-2.09411	8.26751e-76	290.389	-2.54796	3.73038e-27	430.459	-3.11113	2.06721e-127	553.104	-2.5844	-1.99173	3.37359e-17	281.399	-2.29196	5.31284e-12	418.104	-2.94819	3.09439e-37	537.07	-2.41063	-0.851291	0.000233248	371.348	-1.31017	6.14855e-05	518.131	-1.83313	6.00299e-17	641.922	-1.33153
CGI_10006829	-1.24552	-1.76671	-3.35409	-2.12211	complement C1q 3	0.818	defense response to other organism ; response to external stimulus ; defense response ; response to stress	-1.98149	1.97994e-54	219.301	-0.981448	1.58354e-05	137.949	-0.773625	4.64597e-06	121.021	-1.24552	-2.50096	8.04001e-46	199.215	-1.4933	3.11327e-09	119.504	-1.30588	4.64225e-10	103.271	-1.76671	-4.1324	9.85211e-115	189.104	-3.02158	4.33765e-29	104.363	-2.90828	9.02356e-39	87.6093	-3.35409
CGI_10023217	-2.47559	-2.54941	-1.34277	-2.12259	complement C1q 4	0.7325	defense response to other organism ; response to external stimulus ; defense response ; response to stress	-2.33102	2.71448e-10	285.799	-2.06617	3.34404e-07	256.998	-3.02959	1.94968e-16	499.487	-2.47559	-2.39041	1.63961e-40	289.019	-2.06186	1.50342e-16	261.632	-3.19595	2.74963e-71	497.124	-2.54941	-1.15757	1.09496e-18	372.792	-0.884136	0.000168842	346.644	-1.98659	4.04553e-49	593.118	-1.34277
CGI_10014672	-3.45292	-3.84353	-2.8811	-3.39252	Heavy metal-binding HIP	0.7035	defense response to other organism ; response to external stimulus ; defense response ; response to stress	-4.24566	8.05579e-71	90.1422	-2.69701	2.64916e-19	33.8695	-3.41608	2.94277e-36	53.0685	-3.45292	-4.6915	4.23793e-66	86.2884	-3.04837	5.53196e-19	31.4964	-3.79073	1.31061e-34	50.1766	-3.84353	-3.67642	1.70773e-60	94.5009	-2.1255	2.66767e-13	36.9372	-2.84139	1.39808e-27	56.526	-2.8811
CGI_10016318	2.98463	2.35807	NS	2.67135	Heavy metal-binding HIP	0.6255	defense response to other organism ; response to external stimulus ; defense response ; response to stress	3.87481	3.21474e-34	59.1509	2.58802	4.31139e-18	66.8599	2.49105	1.51228e-19	66.4574	2.98463	3.31804	1.60785e-30	34.9299	1.9288	1.0275e-12	41.5171	1.82736	5.11147e-14	41.6601	2.35807	0.8742	0.0346377	7.51696	NS	NS	NS	NS	NS	NS	NS
CGI_10011074	3.26166	1.90473	NS	2.58319	location of vulva defective 1-like	0.6617	defense response to other organism ; response to external stimulus ; defense response ; response to stress	3.46274	2.29283e-59	116.2	2.91217	1.20297e-48	125.607	3.41007	9.93705e-68	119.298	3.26166	2.12317	7.05611e-25	46.9465	1.5424	7.21125e-16	53.3837	2.0486	5.5561e-28	48.6371	1.90473	NS	NS	NS	NS	NS	NS	NS	NS	NS	NS
CGI_10004791	2.21612	2.72529	NS	2.4707	AAEL006456-PA [Aedes aegypti]	0.666	defense response to other organism ; response to external stimulus ; defense response ; response to stress	3.1426	3.4374e-24	24.0551	3.02247	2.12106e-24	25.3373	0.483283	0.0336697	38.6767	2.21612	3.6256	8.32239e-34	34.9392	3.49304	8.95059e-35	36.6205	1.05722	3.74178e-07	49.4472	2.72529	NS	NS	NS	-1.0239	0.0401092	2.8309	-3.55827	1.01267e-23	16.9408	NS
CGI_10008321	1.86596	2.26825	NS	2.06711	Lectin AAEL006456-PA [Aedes aegypti]	0.597	defense response to other organism ; response to external stimulus ; defense response ; response to stress	1.81152	3.75705e-19	829.428	1.95961	7.08782e-22	844.878	1.82675	3.36159e-16	841.98	1.86596	2.22229	1.54495e-86	982.945	2.36227	3.90616e-88	1004.75	2.2202	7.34392e-47	1000.08	2.26825	NS	NS	NS	NS	NS	NS	NS	NS	NS	NS
CGI_10002633	2.01429	2.02883	NS	2.02156	complement C1q tumor necrosis factor-related 3-like	0.776	defense response to other organism ; response to external stimulus ; defense response ; response to stress	0.987994	0.031946	12.121	2.51098	4.28832e-09	9.84609	2.54388	6.95604e-09	9.54214	2.01429	1.05748	0.0164783	12.4082	2.50022	5.01969e-10	10.2024	2.52881	7.66881e-10	9.92188	2.02883	NS	NS	NS	NS	NS	NS	NS	NS	NS	NS
CGI_10028836	1.71223	2.20644	NS	1.95933	Macrophage mannose receptor partial	0.535	defense response to other organism ; response to external stimulus ; defense response ; response to stress	1.41612	6.62024e-06	25.9641	2.2075	7.12272e-18	24.31	1.51307	1.42475e-10	26.6112	1.71223	1.90506	4.15637e-10	34.8994	2.68775	1.04998e-25	33.655	2.02651	1.69419e-17	35.767	2.20644	-1.32058	0.00354739	8.089	-0.921854	0.0397215	5.63794	-1.58192	5.71833e-05	8.3657	-1.27479
CGI_10027019	2.3926	1.20485	NS	1.79872	Complement C1q 2	0.8295	defense response to other organism ; response to external stimulus ; defense response ; response to stress	3.18455	6.62651e-48	47.6215	2.13155	2.10894e-33	54.9746	1.86169	4.60177e-30	56.2008	2.3926	1.96573	1.27256e-11	22.7435	0.951119	0.000538461	28.9458	0.697686	0.00635755	30.6433	1.20485	-1.05576	0.0118056	5.71569	-2.10809	2.48613e-09	11.515	-2.43932	5.2792e-14	13.6284	-1.86772
CGI_10012471	1.59528	1.98212	NS	1.7887	Lectin	1	defense response to other organism ; response to external stimulus ; defense response ; response to stress	1.78717	1.54247e-07	11.4453	2.10008	1.09574e-09	11.4038	0.898584	0.00519692	14.2331	1.59528	2.16928	1.34431e-10	15.1291	2.44816	3.25383e-13	15.2441	1.32894	2.12405e-05	17.9528	1.98212	NS	NS	NS	NS	NS	NS	-1.22005	0.00282477	6.46485	NS
CGI_10013136	1.64412	1.89556	NS	1.76984	Complement C1q 4	0.675	defense response to other organism ; response to external stimulus ; defense response ; response to stress	2.49337	4.25534e-22	170.535	1.88934	1.50388e-15	192.198	0.549653	0.00549173	253.108	1.64412	2.73908	7.15359e-28	197.126	2.12992	1.77122e-20	219.382	0.817674	1.13591e-05	278.347	1.89556	NS	NS	NS	NS	NS	NS	-1.35392	6.77545e-07	141.22	NS
CGI_10026907	2.2085	1.25753	NS	1.73301	Complement C1q 4	0.7395	defense response to other organism ; response to external stimulus ; defense response ; response to stress	2.60083	9.44443e-89	1988.46	1.71973	1.55368e-17	2296.65	2.30492	6.71048e-87	2096.28	2.2085	1.64598	2.11932e-42	1111.61	0.781434	0.000158631	1377.86	1.34516	1.29574e-37	1200.93	1.25753	0.347806	0.00327822	634.007	-0.479229	0.0251703	892.802	NS	NS	NS	NS
CGI_10016352	1.92329	1.49086	NS	1.70707	Complement C1q 2	0.833	defense response to other organism ; response to external stimulus ; defense response ; response to stress	3.14416	5.97644e-74	108.292	1.46717	2.00218e-26	138.244	1.15852	2.56947e-12	144.021	1.92329	2.65849	1.20056e-29	83.3477	1.05288	5.62792e-07	111.549	0.761191	0.00116569	117.735	1.49086	NS	NS	NS	-1.22302	2.06324e-12	52.3143	-1.4931	4.49323e-14	59.9439	NS
CGI_10011368	1.49225	1.77321	NS	1.63273	Lectin	0.716	defense response to other organism ; response to external stimulus ; defense response ; response to stress	0.759711	0.00130092	50.9425	1.24532	2.52031e-06	46.8056	2.47173	5.88765e-23	38.0857	1.49225	1.07799	2.3533e-05	58.9528	1.53462	3.44879e-08	55.2863	2.70701	2.08682e-23	46.68	1.77321	-1.14813	3.63524e-05	26.8315	NS	NS	NS	NS	NS	NS	NS
CGI_10018846	2.27623	0.942818	NS	1.60952	complement C1q tumor necrosis factor-related 3-like isoform X2 [Crassostrea gigas]	0.713	defense response to other organism ; response to external stimulus ; defense response ; response to stress	2.06375	9.16856e-24	357.971	2.31209	1.32962e-31	362.195	2.45285	4.86496e-45	350.593	2.27623	0.750721	0.00714689	174.27	0.973955	0.000204471	171.177	1.10378	4.27973e-06	163.633	0.942818	-0.541769	0.0151938	110.663	NS	NS	NS	NS	NS	NS	NS
CGI_10009934	1.59487	1.44317	NS	1.51902	Lectin	0.696	defense response to other organism ; response to external stimulus ; defense response ; response to stress	1.61754	9.63349e-06	9.25506	1.31895	0.000244395	10.318	1.84813	3.59494e-07	9.17139	1.59487	1.47892	5.42324e-05	8.34913	1.16762	0.00120186	9.35218	1.68295	2.69584e-06	8.2623	1.44317	-1.10353	0.0254544	2.29115	-1.48034	0.00199281	3.08852	-1.06332	0.035324	2.05539	-1.21573
CGI_10017131	1.46632	1.47564	NS	1.47098	Complement C1q tumor necrosis factor-related 3	0.6035	defense response to other organism ; response to external stimulus ; defense response ; response to stress	1.65036	2.72504e-12	274.935	1.11989	1.98596e-15	321.422	1.62872	3.38674e-20	284.114	1.46632	1.65922	5.43024e-13	269.764	1.12853	5.83664e-17	315.084	1.63917	5.55329e-22	279.064	1.47564	NS	NS	NS	-0.449114	0.00186241	177.279	NS	NS	NS	NS
CGI_10021060	1.53972	1.27467	NS	1.40719	C-type lectin domain family 4 member F	0.806	defense response to other organism ; response to external stimulus ; defense response ; response to stress	1.00063	0.0025467	13.4483	1.52007	3.74376e-06	12.5103	2.09847	1.11747e-09	11.0966	1.53972	0.790576	0.0479169	12.1705	1.24689	0.00114173	11.2118	1.78653	2.31675e-06	9.87252	1.27467	NS	NS	NS	NS	NS	NS	NS	NS	NS	NS
CGI_10009627	1.5713	0.934474	NS	1.25289	double-stranded RNA-specific adenosine deaminase-like	0.673	defense response to other organism ; response to external stimulus ; defense response ; response to stress	1.33452	1.28996e-13	700.308	2.00945	1.32936e-37	653.332	1.36994	2.51841e-21	712.884	1.5713	0.701091	5.03276e-06	498.707	1.37291	9.94177e-33	445.223	0.729423	5.47361e-14	507.483	0.934474	NS	NS	NS	0.425634	0.00319447	303.142	NS	NS	NS	NS
CGI_10023216	0.913564	1.38416	NS	1.14886	complement C1q 4	0.7105	defense response to other organism ; response to external stimulus ; defense response ; response to stress	0.652001	0.000160289	701.233	0.915094	5.05905e-09	682.439	1.1736	4.73099e-12	629.719	0.913564	1.12645	3.00429e-10	857.327	1.3845	9.85008e-17	845.71	1.64152	2.50422e-20	791.875	1.38416	NS	NS	NS	0.434826	0.0236211	567.827	0.699142	0.000367751	516.516	NS
CGI_10001743	1.23185	0.909905	NS	1.07088	Macrophage mannose receptor partial	0.5395	defense response to other organism ; response to external stimulus ; defense response ; response to stress	1.6783	2.61778e-07	19.4603	0.959584	0.000252489	23.973	1.05765	0.000806963	22.8187	1.23185	1.35052	0.000112609	15.909	0.63765	0.0334662	20.1719	0.741544	0.0318331	19.1196	0.909905	NS	NS	NS	NS	NS	NS	NS	NS	NS	NS
CGI_10007585	1.14119	0.739249	NS	0.940219	complement C1q tumor necrosis factor-related 3-like	0.5955	defense response to other organism ; response to external stimulus ; defense response ; response to stress	1.13076	4.19379e-16	232.595	0.871034	2.33884e-07	256.66	1.42178	2.51431e-18	222.979	1.14119	0.728006	1.53221e-05	188.366	0.471014	0.0204859	210.206	1.01873	4.25098e-08	178.381	0.739249	-0.622577	0.000107636	120.919	-0.869375	2.28602e-06	140.819	NS	NS	NS	NS
CGI_10027086	1.2114	0.597358	NS	0.904379	hemagglutinin amebocyte aggregation factor-like	0.7455	defense response to other organism ; response to external stimulus ; defense response ; response to stress	1.08715	4.77254e-22	525.063	1.1559	5.21188e-26	538.428	1.39115	2.24112e-40	502.962	1.2114	0.475742	0.00347961	390.343	0.539323	0.000527464	398.377	0.777008	1.22602e-07	366.6	0.597358	-0.396206	0.012664	299.587	-0.334344	0.0344197	303.596	NS	NS	NS	NS
CGI_10027555	0.902063	0.894243	NS	0.898153	C-type mannose receptor 2	0.668	defense response to other organism ; response to external stimulus ; defense response ; response to stress	1.12711	9.01286e-13	384.802	0.346445	0.00255011	493.789	1.23263	7.48011e-06	377.722	0.902063	1.12452	1.85971e-15	373.351	0.338531	6.97616e-05	479.439	1.21968	3.7521e-06	366.76	0.894243	0.728407	1.06373e-05	326.977	NS	NS	NS	0.854473	0.00280386	318.45	NS
CGI_10012562	1.07941	0.612826	NS	0.846117	Scavenger receptor	0.7155	defense response to other organism ; response to external stimulus ; defense response ; response to stress	0.983958	1.97499e-24	191.609	1.30499	3.59154e-45	186.116	0.949276	5.14957e-19	196.882	1.07941	0.522178	0.029871	153.975	0.821582	0.000216785	147.307	0.49472	0.042199	158.599	0.612826	NS	NS	NS	NS	NS	NS	NS	NS	NS	NS
CGI_10001635	0.765877	0.761759	NS	0.763818	Interferon-induced 44	0.961	defense response to other organism ; response to external stimulus ; defense response ; response to stress	0.80598	1.44116e-18	294.175	0.651975	2.70258e-09	318.722	0.839675	5.01434e-19	297.817	0.765877	0.802348	1.55597e-16	286.121	0.645207	1.77385e-08	310.027	0.837721	3.86855e-17	289.93	0.761759	NS	NS	NS	NS	NS	NS	NS	NS	NS	NS
CGI_10008241	0.607407	0.477504	NS	0.542456	C-type lectin domain family member A-like	0.8867	defense response to other organism ; response to external stimulus ; defense response ; response to stress	0.529545	3.09905e-06	322.628	0.627913	1.3289e-06	326.093	0.664764	1.7478e-10	317.006	0.607407	0.400423	0.0142121	298.589	0.495609	0.00379916	301.333	0.53648	0.000358928	293.07	0.477504	NS	NS	NS	NS	NS	NS	NS	NS	NS	NS
CGI_10023978	-0.430664	-0.348243	NS	-0.389454	macrophage mannose receptor 1-like	0.5635	defense response to other organism ; response to external stimulus ; defense response ; response to stress	-0.502261	4.1558e-14	540.706	-0.35467	9.31477e-08	530.442	-0.435062	1.34997e-08	537.542	-0.430664	-0.419872	3.66028e-10	539.24	-0.274886	4.51878e-05	529.91	-0.34997	4.95595e-06	536.671	-0.348243	-0.156064	0.015954	616.695	NS	NS	NS	NS	NS	NS	NS
CGI_10003083	-0.816922	-0.521805	NS	-0.669364	probable ATP-dependent RNA helicase DHX58	0.6195	defense response to other organism ; response to external stimulus ; defense response ; response to stress	-1.16145	1.67746e-32	1047.04	-0.557737	7.37536e-12	827.903	-0.731577	3.34046e-14	875.197	-0.816922	-0.865688	4.84555e-15	1090.22	-0.265475	0.0122208	880.015	-0.434253	0.000127281	924.802	-0.521805	NS	NS	NS	0.406844	6.49542e-05	1179.83	NS	NS	NS	NS
CGI_10010170	-0.669795	-0.759286	NS	-0.71454	Leucine-rich repeat-containing 74A	0.862	defense response to other organism ; response to external stimulus ; defense response ; response to stress	-0.692266	4.78861e-14	508.792	-0.465347	1.16181e-06	481.537	-0.851771	4.32832e-23	556.901	-0.669795	-0.782078	1.66348e-21	483.57	-0.556868	4.6446e-11	456.72	-0.93891	5.15071e-36	530.285	-0.759286	NS	NS	NS	NS	NS	NS	-0.252339	0.00612203	675.875	NS
CGI_10027561	-0.889503	-0.738607	NS	-0.814055	perlucin	0.6495	defense response to other organism ; response to external stimulus ; defense response ; response to stress	-0.823471	0.000495364	36.288	-0.728036	0.00292826	36.1272	-1.117	1.01093e-08	42.3787	-0.889503	-0.676308	0.00613075	36.6479	-0.581018	0.0243136	36.563	-0.958496	1.93868e-06	42.6262	-0.738607	NS	NS	NS	NS	NS	NS	-0.394942	0.0243603	52.7652	NS
CGI_10026769	-0.683297	-1.00117	NS	-0.842234	Complement C1q 2	0.805	defense response to other organism ; response to external stimulus ; defense response ; response to stress	-0.466538	0.0204783	178.738	-0.798328	1.28553e-05	214.947	-0.785025	8.81373e-07	209.053	-0.683297	-0.783774	5.28945e-06	159.301	-1.11715	6.18127e-12	194.076	-1.10259	7.81602e-16	188.569	-1.00117	NS	NS	NS	NS	NS	NS	NS	NS	NS	NS
CGI_10008604	-0.930548	-0.841219	NS	-0.885884	Complement C1q 4	0.5825	defense response to other organism ; response to external stimulus ; defense response ; response to stress	-1.15508	1.65077e-21	281.821	-0.619549	1.49656e-06	229.374	-1.01702	1.55852e-18	268.599	-0.930548	-1.06557	1.64911e-18	279.858	-0.533125	3.93637e-05	229.074	-0.924963	7.63122e-16	267.152	-0.841219	-0.546676	4.3164e-08	336.647	NS	NS	NS	-0.405202	1.66584e-05	324.024	NS
CGI_10024093	-0.889219	-1.02906	NS	-0.959141	perlucin	0.684	defense response to other organism ; response to external stimulus ; defense response ; response to stress	-1.34171	2.80714e-28	2485.21	-0.672229	3.22256e-05	1889.19	-0.653721	5.54681e-06	1834.67	-0.889219	-1.48315	3.75164e-37	2354.48	-0.813004	1.40214e-07	1772.48	-0.791035	7.65749e-09	1720.7	-1.02906	-0.846699	1.33706e-14	2846.88	NS	NS	NS	NS	NS	NS	NS
CGI_10024070	-1.14073	-0.815935	NS	-0.978334	interferon-induced 44-like [Crassostrea gigas]	0.7645	defense response to other organism ; response to external stimulus ; defense response ; response to stress	-1.06891	4.40609e-09	57.5331	-1.19643	3.35457e-07	64.9097	-1.15686	5.94383e-11	61.234	-1.14073	-0.743762	5.09462e-05	60.7018	-0.877355	0.000169803	68.1077	-0.826689	2.39315e-06	64.4063	-0.815935	NS	NS	NS	NS	NS	NS	NS	NS	NS	NS
CGI_10016362	-1.08472	-0.888514	NS	-0.986617	Complement C1q 2	0.8155	defense response to other organism ; response to external stimulus ; defense response ; response to stress	-0.7906	6.34434e-15	133.165	-1.10461	6.05603e-22	160.534	-1.35895	5.83064e-30	178.758	-1.08472	-0.596275	7.41682e-07	136.333	-0.910791	2.29658e-12	163.319	-1.15848	2.78424e-18	180.9	-0.888514	0.670224	1.05737e-08	225.61	0.349388	0.0109979	257.197	NS	NS	NS	NS
CGI_10028387	-1.15193	-0.849435	NS	-1.00068	deleted in malignant brain tumors 1 -like	0.663	defense response to other organism ; response to external stimulus ; defense response ; response to stress	-0.99908	1.52349e-15	155.883	-0.892949	5.59407e-08	154.939	-1.56377	2.80821e-17	215.29	-1.15193	-0.697028	1.96142e-05	163.148	-0.596466	0.00280821	162.768	-1.25481	8.9061e-10	221.275	-0.849435	NS	NS	NS	NS	NS	NS	-0.778263	0.00216319	259.894	NS
CGI_10011953	-0.540943	-1.66568	NS	-1.10331	interferon-induced 44-like [Crassostrea gigas]	0.905	defense response to other organism ; response to external stimulus ; defense response ; response to stress	-0.415921	0.000335543	126.09	-0.517642	9.98236e-05	136.854	-0.689267	2.45763e-11	144.068	-0.540943	-1.54448	1.72401e-31	93.7582	-1.63785	4.13214e-28	103.146	-1.8147	1.37533e-48	110.691	-1.66568	0.343319	0.00107658	168.106	NS	NS	NS	NS	NS	NS	NS
CGI_10028151	-1.29256	-0.932893	NS	-1.11273	Complement C1q 4	0.64	defense response to other organism ; response to external stimulus ; defense response ; response to stress	-1.28515	0.00536356	360.559	-1.37097	0.00426389	335.111	-1.22155	0.0109961	79.8448	-1.29256	-0.972128	0.02464	351.601	-0.963335	0.0257822	327.219	-0.863216	0.0435412	78.336	-0.932893	-1.08287	5.28777e-14	538.358	-0.92751	2.44485e-10	519.32	1.05999	1.53196e-07	254.177	-0.316797
CGI_10014769	-1.52007	-0.888941	NS	-1.2045	interferon alpha-inducible 27 2B isoform X4	0.672	defense response to other organism ; response to external stimulus ; defense response ; response to stress	-1.20009	2.21907e-23	367.588	-1.78828	6.43518e-46	520.698	-1.57183	4.87539e-25	457.59	-1.52007	-0.565706	4.24874e-09	418.636	-1.1594	1.15134e-29	570.455	-0.941717	4.32146e-12	507.713	-0.888941	NS	NS	NS	-0.472217	4.51481e-05	715.239	NS	NS	NS	NS
CGI_10011183	-0.978172	-1.45698	NS	-1.21757	Interferon-induced 44	0.615	defense response to other organism ; response to external stimulus ; defense response ; response to stress	-0.509922	0.012917	62.4059	-1.25121	5.77329e-18	91.4878	-1.17338	2.66215e-15	86.3943	-0.978172	-0.986776	1.34569e-07	53.5392	-1.73382	5.14758e-33	81.6131	-1.65033	4.97483e-29	76.7565	-1.45698	0.755515	7.54446e-06	103.066	NS	NS	NS	NS	NS	NS	NS
CGI_10024233	-1.3114	-1.13652	NS	-1.22396	hemagglutinin amebocyte aggregation factor-like	0.726	defense response to other organism ; response to external stimulus ; defense response ; response to stress	-1.33138	2.09235e-05	157.939	-0.945013	0.0196002	137.568	-1.65781	3.12665e-08	193.631	-1.3114	-1.14679	1.62726e-14	164.063	-0.774784	0.000784241	144.69	-1.48798	7.82621e-29	199.019	-1.13652	-0.582927	0.0438295	196.86	NS	NS	NS	-0.907912	0.000571386	234.02	NS
CGI_10015762	-1.54469	-1.10655	NS	-1.32562	complement C1q 4	0.62	defense response to other organism ; response to external stimulus ; defense response ; response to stress	-1.11158	8.54327e-06	19.1923	-1.30761	6.02505e-07	22.2335	-2.2149	8.28793e-23	36.4231	-1.54469	-0.68171	0.0107886	20.8615	-0.872454	0.00153537	23.9227	-1.76549	3.55876e-15	37.6823	-1.10655	0.437722	0.0407887	32.6108	NS	NS	NS	-0.676331	0.000358549	50.5345	NS
CGI_10002839	-1.48207	-1.29685	NS	-1.38946	perlucin-like	0.677	defense response to other organism ; response to external stimulus ; defense response ; response to stress	-2.00542	5.24092e-24	1245.93	-0.62236	0.00204358	625.341	-1.81842	2.66161e-24	1124.71	-1.48207	-1.82338	2.86146e-22	1245.99	-0.43828	0.027153	643.224	-1.62889	1.05627e-22	1128.56	-1.29685	-0.860967	0.000680925	1580.06	NS	NS	NS	-0.665082	0.00595875	1461.81	NS
CGI_10022218	-1.35503	-1.60355	NS	-1.47929	lymphoid-specific helicase-like	0.793	defense response to other organism ; response to external stimulus ; defense response ; response to stress	-2.03891	1.7129e-106	387.215	-0.869129	2.09558e-06	223.571	-1.15705	2.13779e-21	249.068	-1.35503	-2.29263	6.90274e-149	365.074	-1.11358	2.0317e-10	205.393	-1.40442	6.4759e-34	230.401	-1.60355	-0.647078	1.92407e-12	523.677	0.483933	0.00895698	360.953	NS	NS	NS	NS
CGI_10023196	-0.867212	-2.13782	NS	-1.50251	Scavenger receptor	0.5795	defense response to other organism ; response to external stimulus ; defense response ; response to stress	-0.579716	0.0470484	260.579	-1.15242	3.53491e-06	356.88	-0.869501	0.0176187	315.067	-0.867212	-1.84259	9.02235e-25	194.59	-2.45548	2.60949e-63	286.204	-2.11538	1.12896e-18	246.405	-2.13782	NS	NS	NS	-0.72131	1.0986e-05	410.471	NS	NS	NS	NS
CGI_10009048	-1.22249	-2.14435	NS	-1.68342	complement C1q 3	0.577	defense response to other organism ; response to external stimulus ; defense response ; response to stress	-1.8554	1.98523e-14	34.5691	-0.874041	0.00160771	20.871	-0.938039	0.0013135	21.258	-1.22249	-2.76227	4.40259e-17	29.5078	-1.82054	6.1327e-07	16.0255	-1.85025	6.21406e-07	16.4703	-2.14435	-0.712178	0.00280648	45.1	NS	NS	NS	NS	NS	NS	NS
CGI_10024452	-1.58824	-1.86694	NS	-1.72759	Deleted in malignant brain tumors 1 partial	0.6075	defense response to other organism ; response to external stimulus ; defense response ; response to stress	-1.6419	2.34371e-05	7.71155	-0.916456	0.0465885	5.05467	-2.20636	5.37807e-09	11.7594	-1.58824	-1.94176	1.46413e-06	6.98101	-1.21743	0.00776721	4.37643	-2.44161	2.18027e-10	10.9117	-1.86694	NS	NS	NS	NS	NS	NS	-1.2056	0.000604818	14.3714	NS
CGI_10005327	-1.60979	-1.92454	NS	-1.76716	perlucin	0.7925	defense response to other organism ; response to external stimulus ; defense response ; response to stress	-0.696725	0.0345436	13.3551	-2.73251	3.77133e-32	44.2404	-1.40014	8.38558e-07	19.6261	-1.60979	-1.07284	0.0117935	11.1994	-2.99649	9.82878e-22	41.2314	-1.70428	5.32057e-06	17.2687	-1.92454	2.417	2.78956e-21	64.0524	0.488593	0.043576	97.7217	1.76182	6.38033e-13	71.5408	1.55581
CGI_10025591	-1.70731	-2.05746	NS	-1.88239	complement C1q 4	0.6355	defense response to other organism ; response to external stimulus ; defense response ; response to stress	-2.62222	1.76941e-12	17.5275	-1.11709	0.0253981	6.81578	-1.38263	0.00110168	7.05571	-1.70731	-2.98548	7.75243e-16	16.4909	-1.43392	0.00191651	6.04729	-1.75298	1.89897e-05	6.28526	-2.05746	-1.69184	1.16982e-05	19.9244	NS	NS	NS	NS	NS	NS	NS
CGI_10014534	-1.9929	-2.10223	NS	-2.04757	Interferon-induced 44	0.932	defense response to other organism ; response to external stimulus ; defense response ; response to stress	-1.47578	3.0694e-06	15.3174	-3.03021	1.04288e-32	40.9501	-1.47272	1.66354e-06	15.4081	-1.9929	-1.60521	9.31932e-08	14.5334	-3.12025	5.03561e-36	39.5062	-1.58124	6.78203e-08	14.6151	-2.10223	NS	NS	NS	-1.11295	6.41993e-10	55.1932	0.470065	0.0418571	28.7437	NS
CGI_10014533	-2.23261	-2.00186	NS	-2.11723	Interferon-induced 44	0.9315	defense response to other organism ; response to external stimulus ; defense response ; response to stress	-2.03642	1.4692e-16	53.0689	-2.95449	3.43909e-45	95.2881	-1.70693	6.73169e-10	45.1937	-2.23261	-1.81684	4.46781e-12	52.8603	-2.70151	7.94363e-33	94.0921	-1.48721	2.37568e-07	45.2177	-2.00186	NS	NS	NS	-0.955814	2.8477e-12	132.022	NS	NS	NS	NS
CGI_10004133	-2.72013	-1.59101	NS	-2.15557	Complement C1q 4	0.778	defense response to other organism ; response to external stimulus ; defense response ; response to stress	-2.84881	2.10806e-39	197.14	-1.82686	9.66964e-06	138.382	-3.48473	1.86288e-69	298.621	-2.72013	-1.65827	2.84079e-06	212.709	-0.939071	0.0460001	156.488	-2.17568	1.29994e-10	311.917	-1.59101	NS	NS	NS	NS	NS	NS	-1.07535	0.000156985	407.77	NS
CGI_10004134	-2.17033	-2.22303	NS	-2.19668	Complement C1q 4	0.767	defense response to other organism ; response to external stimulus ; defense response ; response to stress	-2.89341	4.20311e-50	309.87	-2.115	1.23278e-47	191.203	-1.50258	1.27182e-17	134.795	-2.17033	-2.94822	3.90906e-54	299.996	-2.16798	3.93647e-52	184.588	-1.55289	1.81324e-19	129.576	-2.22303	-1.46801	1.15623e-16	381.251	-0.644813	2.92751e-07	262.222	NS	NS	NS	NS
CGI_10012889	-2.18914	-2.43204	NS	-2.31059	Complement C1q 4	0.6875	defense response to other organism ; response to external stimulus ; defense response ; response to stress	-1.14391	0.000848522	83.9012	-1.84332	1.04516e-06	144.057	-3.58019	3.99467e-27	484.357	-2.18914	-1.22829	4.0186e-07	81.6617	-2.06415	6.63764e-17	140.323	-4.0037	1.8281e-98	471.347	-2.43204	NS	NS	NS	NS	NS	NS	-2.39612	1.50472e-37	553.965	NS
CGI_10028417	-2.5797	-2.49992	NS	-2.53981	deoxynucleoside triphosphate triphosphohydrolase SAMHD1-like	0.7175	defense response to other organism ; response to external stimulus ; defense response ; response to stress	-3.98579	3.96118e-50	86.5318	-2.58146	9.04393e-23	31.7355	-1.17186	0.000915168	13.7651	-2.5797	-3.92096	9.75461e-54	84.374	-2.48481	3.73741e-23	31.0678	-1.094	0.00109098	13.5485	-2.49992	-1.56503	2.87642e-17	112.026	NS	NS	NS	1.37413	3.29722e-11	37.9435	NS
CGI_10001510	-2.00402	-6.1332	NS	-4.06861	deleted in malignant brain tumors 1 -like	0.668	defense response to other organism ; response to external stimulus ; defense response ; response to stress	-2.1946	1.31635e-14	367.618	-2.00962	3.42573e-08	375.924	-1.80785	1.36348e-06	325.178	-2.00402	-6.45491	2.94887e-156	304.961	-6.10182	2.00665e-102	311.253	-5.84287	3.13641e-89	262.441	-6.1332	-0.728403	1.15941e-06	508.766	-0.67799	0.00398686	522.791	NS	NS	NS	NS
CGI_10018356	5.19939	NS	3.93237	4.56588	complement C1q 2	0.8108	defense response to other organism ; response to external stimulus ; defense response ; response to stress	3.5379	4.52176e-18	227.285	5.72167	1.67986e-100	232.502	6.33859	5.5048e-101	226.653	5.19939	NS	NS	NS	NS	NS	NS	NS	NS	NS	NS	2.51386	3.22217e-09	104.512	4.33922	8.80081e-43	104.51	4.94402	2.70066e-48	101.284	3.93237
CGI_10015880	1.81472	NS	1.28111	1.54791	galactose-specific lectin nattectin-like	0.6315	defense response to other organism ; response to external stimulus ; defense response ; response to stress	1.43756	1.11084e-09	168.447	2.02335	1.87101e-21	160.288	1.98324	5.16433e-11	155.236	1.81472	NS	NS	NS	NS	NS	NS	NS	NS	NS	NS	0.911574	0.00152012	133.023	1.46673	1.70698e-08	122.968	1.46502	1.09579e-05	118.671	1.28111
CGI_10026841	0.959031	NS	1.58221	1.27062	Complement C1q 3	0.781	defense response to other organism ; response to external stimulus ; defense response ; response to stress	0.57004	0.0188718	50.0987	0.99489	0.00013351	46.3311	1.31216	3.08745e-08	42.4302	0.959031	NS	NS	NS	0.836607	0.00423386	42.3456	1.14594	1.86556e-05	38.6335	NS	1.19873	7.4183e-08	69.9399	1.60975	5.79717e-11	66.8079	1.93814	2.86659e-17	62.5048	1.58221
CGI_10028719	1.04389	NS	1.02922	1.03656	signal transducer and activator of transcription 5B-like	0.6985	defense response to other organism ; response to external stimulus ; defense response ; response to stress	1.42146	5.83019e-27	800.063	1.31705	2.97333e-35	851.773	0.39317	3.34695e-06	1052.42	1.04389	1.16235	6.01125e-16	685.227	1.05324	2.01337e-18	731.671	NS	NS	NS	NS	1.40495	1.17616e-22	816.346	1.29827	1.49436e-27	868.591	0.384436	0.000214121	1074.83	1.02922
CGI_10004160	0.70097	NS	1.2123	0.956634	interferon-induced 44-like	0.7395	defense response to other organism ; response to external stimulus ; defense response ; response to stress	0.332857	0.0365728	139.534	0.951909	3.50649e-09	122.2	0.818144	1.97145e-09	124.147	0.70097	-0.403856	0.00577607	104.929	NS	NS	NS	NS	NS	NS	NS	0.843829	1.62061e-11	177.711	1.45855	2.67318e-25	161.261	1.33452	7.56169e-31	162.71	1.2123
CGI_10011252	0.683198	NS	0.764512	0.723855	Complement C1q 4	0.825	defense response to other organism ; response to external stimulus ; defense response ; response to stress	1.20834	1.13126e-28	598.864	0.479092	0.00318669	747.169	0.362161	0.000100444	760.443	0.683198	1.11272	1.01816e-13	561.158	NS	NS	NS	NS	NS	NS	NS	1.29053	2.10851e-34	639.566	0.556475	0.000396731	792.349	0.446527	3.1016e-07	805.751	0.764512
CGI_10005763	0.532572	NS	0.27485	0.403711	ribonuclease 3 isoform X2 [Copidosoma floridanum]	0.8445	defense response to other organism ; response to external stimulus ; defense response ; response to stress	0.418014	6.68327e-12	1041.78	0.463075	7.76694e-18	1070.07	0.716628	3.07711e-26	977.53	0.532572	NS	NS	NS	NS	NS	NS	0.35826	4.29492e-06	820.873	NS	0.160886	0.0113077	967.913	0.201927	0.000221106	992.746	0.461736	5.42572e-12	900.138	0.27485
CGI_10002756	-0.437251	NS	-0.393921	-0.415586	macrophage mannose receptor 1-like	0.459	defense response to other organism ; response to external stimulus ; defense response ; response to stress	-0.299592	0.0383115	626.898	-0.412527	0.00583113	682.798	-0.599634	2.78267e-05	723.889	-0.437251	NS	NS	NS	NS	NS	NS	-0.347985	0.000348438	759.671	NS	-0.254975	0.0257289	652.095	-0.371667	0.00267047	709.747	-0.555122	2.81908e-06	751.526	-0.393921
CGI_10027826	-0.647397	NS	-0.321034	-0.484215	macrophage-expressed gene 1 -like [Crassostrea gigas]	0.6225	defense response to other organism ; response to external stimulus ; defense response ; response to stress	-0.721351	8.42891e-17	2683.98	-0.605309	5.82108e-14	2656	-0.61553	3.02572e-12	2617.08	-0.647397	-0.224845	0.00671213	3021.53	NS	NS	NS	NS	NS	NS	NS	-0.394958	5.64786e-10	3017.62	-0.281295	1.26672e-07	2999.83	-0.28685	1.37593e-05	2954.1	-0.321034
CGI_10003367	-0.655865	NS	-0.37821	-0.517038	Neuroendocrine convertase 1	0.8135	defense response to other organism ; response to external stimulus ; defense response ; response to stress	-0.6068	0.000115294	4453.7	-0.769345	7.17946e-10	4962.37	-0.59145	4.9776e-07	4501.11	-0.655865	NS	NS	NS	NS	NS	NS	NS	NS	NS	NS	-0.330312	0.022796	4958.93	-0.494335	5.8378e-07	5496.77	-0.309982	0.00033976	5014.48	-0.37821
CGI_10022627	-0.681642	NS	-0.843182	-0.762412	C-type lectin domain family member A-like	0.63	defense response to other organism ; response to external stimulus ; defense response ; response to stress	-0.68075	2.67967e-09	333.562	-0.652333	6.42054e-07	343.625	-0.711843	1.5439e-17	344.163	-0.681642	NS	NS	NS	NS	NS	NS	NS	NS	NS	NS	-0.840767	2.29593e-08	326.986	-0.817245	3.5445e-07	336.743	-0.871534	1.14285e-11	337.46	-0.843182
CGI_10027018	-0.746314	NS	-0.850172	-0.798243	Scavenger receptor	0.694	defense response to other organism ; response to external stimulus ; defense response ; response to stress	-0.998019	0.000343436	81.8899	-0.611115	0.0258727	70.0573	-0.629809	0.0271897	69.4972	-0.746314	-0.578502	0.00841654	89.8503	NS	NS	NS	NS	NS	NS	NS	-1.11077	2.02627e-07	82.4116	-0.713304	0.000160743	70.2199	-0.726442	0.000380661	69.6449	-0.850172
CGI_10002721	-0.762149	NS	-1.45532	-1.10873	Caprin-2 [Crassostrea gigas]	0.662	defense response to other organism ; response to external stimulus ; defense response ; response to stress	-0.638071	0.00610332	46.6165	-0.708092	0.000109037	49.6519	-0.940285	1.55149e-07	54.087	-0.762149	NS	NS	NS	-0.417646	0.017879	52.6274	-0.64733	8.67159e-05	56.8621	NS	-1.31546	3.45997e-06	39.9589	-1.41582	5.77453e-09	42.7728	-1.63467	8.53273e-12	47.4352	-1.45532
CGI_10012515	-1.08555	NS	-1.13509	-1.11032	C-type lectin mannose-binding isoform-like	0.635	defense response to other organism ; response to external stimulus ; defense response ; response to stress	-0.827846	3.89471e-07	203.886	-0.777136	7.60949e-10	206.412	-1.65168	6.60987e-27	314.681	-1.08555	NS	NS	NS	NS	NS	NS	-0.980284	4.83154e-10	350.14	NS	-0.877241	3.94342e-07	206.091	-0.831792	1.66391e-09	208.602	-1.69623	8.49509e-26	319.43	-1.13509
CGI_10027625	-1.61576	NS	-0.727341	-1.17155	low affinity immunoglobulin epsilon Fc receptor	0.5535	defense response to other organism ; response to external stimulus ; defense response ; response to stress	-1.72039	1.97969e-13	83.5015	-1.66446	5.22466e-14	83.2105	-1.46242	9.60614e-13	72.2676	-1.61576	-0.672569	0.00396901	102.425	-0.60099	0.00708768	103.04	NS	NS	NS	NS	-0.847718	5.46201e-06	103.345	-0.776377	5.28366e-06	103.798	-0.557929	0.000216409	92.1867	-0.727341
CGI_10002963	-1.27608	NS	-1.13594	-1.20601	perlucin-like [Crassostrea gigas]	0.5895	defense response to other organism ; response to external stimulus ; defense response ; response to stress	-1.16804	3.04792e-07	452.037	-1.58181	1.94204e-12	586.836	-1.07841	3.18065e-06	439.754	-1.27608	-0.308233	0.0394327	558.648	-0.733632	2.91852e-07	694.991	NS	NS	NS	NS	-1.02738	1.41694e-43	485.053	-1.45602	2.11298e-53	624.44	-0.924418	4.27054e-23	472.864	-1.13594
CGI_10015763	-1.60067	NS	-1.03921	-1.31994	complement C1q tumor necrosis factor-related 4-like	0.64	defense response to other organism ; response to external stimulus ; defense response ; response to stress	-1.46716	9.21801e-21	892.38	-1.45463	1.47553e-16	926.219	-1.88022	6.76144e-37	1136.94	-1.60067	NS	NS	NS	NS	NS	NS	-0.530072	1.97893e-06	1480.5	NS	-0.905487	1.27808e-10	1033.34	-0.89669	5.19168e-08	1073.27	-1.31546	5.79132e-24	1286.07	-1.03921
CGI_10008310	-1.33386	NS	-1.35509	-1.34448	multiple epidermal growth factor-like domains 10	0.62	defense response to other organism ; response to external stimulus ; defense response ; response to stress	-2.05828	7.41542e-33	137.956	-0.915796	1.85249e-08	77.534	-1.02751	1.38985e-09	80.4486	-1.33386	-0.880599	4.94304e-05	166.642	NS	NS	NS	NS	NS	NS	NS	-2.07337	1.59487e-30	140.889	-0.942442	5.9097e-08	78.9658	-1.04946	4.74222e-09	81.9068	-1.35509
CGI_10000823	-2.23753	NS	-0.672693	-1.45511	complement C1q 3	0.7125	defense response to other organism ; response to external stimulus ; defense response ; response to stress	-2.44392	1.17943e-35	61.0273	-2.18043	1.9319e-23	54.5189	-2.08825	4.27605e-19	51.1702	-2.23753	1.39791	1.11631e-22	188.607	1.63266	2.03367e-24	187.452	1.69663	2.21552e-22	181.865	1.57573	-0.866426	1.03691e-07	82.2368	-0.615735	0.00144295	76.3736	-0.535919	0.01255	72.517	-0.672693
CGI_10008113	-2.00161	NS	-1.03882	-1.52022	complement C1q 4	0.7465	defense response to other organism ; response to external stimulus ; defense response ; response to stress	-2.23595	5.30502e-36	166.497	-1.64645	3.88471e-19	122.9	-2.12243	2.07293e-26	160.028	-2.00161	NS	NS	NS	NS	NS	NS	NS	NS	NS	NS	-1.26633	1.23842e-09	198.679	-0.688514	0.00194426	155.156	-1.16161	2.68773e-07	192.603	-1.03882
CGI_10001805	-1.92307	NS	-1.20842	-1.56574	Complement C1q tumor necrosis factor-related 3	0.635	defense response to other organism ; response to external stimulus ; defense response ; response to stress	-2.0272	3.24016e-22	121.283	-2.46449	5.83665e-34	163.748	-1.27751	9.50503e-08	81.6685	-1.92307	NS	NS	NS	-0.652953	0.000217444	222.271	0.525462	0.0133974	141.175	NS	-1.30701	7.91584e-08	139.453	-1.73708	6.3143e-14	183.681	-0.581193	0.0410505	99.116	-1.20842
CGI_10006725	-1.1791	NS	-2.11925	-1.64917	Complement C1q 4	0.6565	defense response to other organism ; response to external stimulus ; defense response ; response to stress	-1.62549	3.215e-19	319.209	-0.566108	0.0033546	196.052	-1.34569	1.30815e-23	276.138	-1.1791	-0.988549	8.1155e-08	353.596	NS	NS	NS	-0.694404	1.01416e-06	312.687	NS	-2.55767	1.007e-53	289.563	-1.50142	4.20612e-20	161.922	-2.29865	5.09333e-96	244.541	-2.11925
CGI_10016092	-1.96916	NS	-1.50715	-1.73816	multimerin-2-like [Crassostrea gigas]	0.531	defense response to other organism ; response to external stimulus ; defense response ; response to stress	-1.65756	1.00229e-20	263.274	-1.81345	6.41008e-21	300.541	-2.43648	3.48952e-47	421.136	-1.96916	NS	NS	NS	-0.566351	0.0105841	383.454	-1.16526	2.42005e-10	499.08	NS	-1.19007	5.45016e-27	296.4	-1.3519	8.97564e-22	335.834	-1.97947	2.97875e-80	458.575	-1.50715
CGI_10028113	-2.35517	NS	-1.57545	-1.96531	perlucin-like [Crassostrea gigas]	0.497	defense response to other organism ; response to external stimulus ; defense response ; response to stress	-2.11118	2.42737e-12	25.2173	-2.63964	1.41181e-24	34.9426	-2.31467	4.12362e-15	28.841	-2.35517	NS	NS	NS	NS	NS	NS	NS	NS	NS	NS	-1.34296	3.82891e-06	29.3828	-1.84514	6.48828e-15	39.5248	-1.53824	4.47686e-08	33.1696	-1.57545
CGI_10013049	-2.31465	NS	-2.95912	-2.63689	galactose-specific lectin nattectin-like	0.718	defense response to other organism ; response to external stimulus ; defense response ; response to stress	-1.90354	9.03705e-27	915.141	-3.63988	2.43023e-143	2749.09	-1.40055	3.96418e-08	727.255	-2.31465	NS	NS	NS	-2.07351	3.13735e-45	3057.58	NS	NS	NS	NS	-2.55338	4.24041e-49	866.726	-4.30425	2.7625e-212	2745.92	-2.01974	3.313e-16	672.607	-2.95912
CGI_10022841	NS	1.3735	1.79537	1.58444	interferon-induced 44-like [Crassostrea gigas]	0.643	defense response to other organism ; response to external stimulus ; defense response ; response to stress	1.39314	2.6115e-09	73.9581	1.33262	2.5878e-05	76.826	NS	NS	NS	NS	1.72668	1.72171e-25	84.2066	1.62288	1.60628e-09	87.4537	0.770956	1.42189e-05	105.048	1.3735	2.13823	6.07884e-23	116.636	2.03	3.98581e-12	121.154	1.21789	4.65488e-08	139.136	1.79537
CGI_10008908	NS	1.85445	1.19972	1.52708	complement C1q tumor necrosis factor-related 4-like [Crassostrea gigas]	0.7125	defense response to other organism ; response to external stimulus ; defense response ; response to stress	-2.09637	9.13152e-15	26.7479	-1.5547	6.67704e-09	19.6317	-2.92076	8.8335e-37	44.6124	-2.19061	1.9005	2.16984e-23	108.928	2.51032	4.02277e-47	105.309	1.15254	3.06105e-13	128.14	1.85445	1.2496	7.68724e-11	79.7333	1.8614	6.9655e-28	74.5107	0.488149	0.00264045	99.1198	1.19972
CGI_10018753	NS	0.786072	1.48436	1.13521	Scavenger receptor	0.6755	defense response to other organism ; response to external stimulus ; defense response ; response to stress	NS	NS	NS	0.602435	6.1556e-06	274.874	0.497749	0.00159854	277.407	NS	0.549434	0.00305145	338.833	0.954227	3.55675e-08	316.408	0.854556	5.73106e-06	318.306	0.786072	1.27216	0.000266636	556.748	1.63549	1.69998e-06	540.409	1.54542	9.94944e-06	538.634	1.48436
CGI_10022940	NS	0.569834	0.627425	0.59863	galectin-5-like isoform X1 [Crassostrea gigas]	0.7655	defense response to other organism ; response to external stimulus ; defense response ; response to stress	NS	NS	NS	NS	NS	NS	NS	NS	NS	NS	0.547825	7.51116e-06	579.525	0.607423	2.61089e-09	592.906	0.554254	6.31173e-08	591.51	0.569834	0.60557	1.02391e-08	624.599	0.665183	4.20905e-16	638.975	0.611522	4.23166e-14	636.957	0.627425
CGI_10012174	NS	-0.382351	-0.293465	-0.337908	Lectin	0.9933	defense response to other organism ; response to external stimulus ; defense response ; response to stress	NS	NS	NS	-0.223639	0.0187097	424.818	-0.405448	3.0853e-07	446.646	NS	-0.280429	0.00070317	373.336	-0.345119	0.000282844	398.387	-0.521504	2.35829e-10	420.029	-0.382351	-0.190563	0.0389523	404.375	-0.256832	0.0127158	431.099	-0.433	9.10331e-07	453.502	-0.293465
CGI_10010346	NS	-0.562861	-0.735889	-0.649375	[Nematostella vectensis]	0.5475	defense response to other organism ; response to external stimulus ; defense response ; response to stress	0.227315	0.049012	350.598	NS	NS	NS	NS	NS	NS	NS	-0.499708	0.000704254	267.456	-0.580202	0.00256103	289.271	-0.608672	0.00017013	286.914	-0.562861	-0.672204	0.00109956	266.773	-0.753319	0.00118193	289.138	-0.782146	0.000231218	286.826	-0.735889
CGI_10004069	NS	-0.693461	-0.627677	-0.660569	STING-stimulator of interferon genes -like isoform X3 [Crassostrea gigas]	0.6655	defense response to other organism ; response to external stimulus ; defense response ; response to stress	-0.721079	3.37129e-13	408.831	NS	NS	NS	-0.701263	1.79655e-10	414.04	NS	-0.872535	6.87307e-16	382.662	-0.358552	0.00990753	319.871	-0.849296	3.75003e-13	387.552	-0.693461	-0.80589	2.01626e-14	409.745	-0.292637	0.0332387	343.811	-0.784505	6.54493e-12	414.775	-0.627677
CGI_10018780	NS	-0.646278	-0.858791	-0.752534	Heavy metal-binding HIP	0.6785	defense response to other organism ; response to external stimulus ; defense response ; response to stress	NS	NS	NS	-0.373434	0.0471469	326.492	NS	NS	NS	NS	-0.510551	0.0343429	251.105	-0.73195	9.24481e-05	286.509	-0.696332	0.000402129	277.451	-0.646278	-0.716144	0.000262601	249.893	-0.947541	8.16134e-12	286.543	-0.912688	1.6944e-09	277.171	-0.858791
CGI_10016713	NS	-1.13484	-1.11023	-1.12253	paramyosin-like isoform X1 [Crassostrea gigas]	0.5685	defense response to other organism ; response to external stimulus ; defense response ; response to stress	NS	NS	NS	-1.10852	0.00052213	52.8896	-0.852098	0.00984405	45.2063	NS	-0.825526	0.0390217	32.694	-1.41403	3.56423e-05	47.4861	-1.16496	0.000876499	40.0723	-1.13484	-0.789577	0.0458389	34.8169	-1.39475	4.47988e-05	50.3993	-1.14636	0.00108274	42.5692	-1.11023
CGI_10011015	NS	-0.869966	-1.61429	-1.24213	Metallo ase inhibitor 3	0.6205	defense response to other organism ; response to external stimulus ; defense response ; response to stress	NS	NS	NS	NS	NS	NS	NS	NS	NS	NS	-1.13881	1.66123e-06	107.73	-0.585	0.0125517	85.0838	-0.88609	3.69561e-05	96.1177	-0.869966	-1.87173	6.45194e-18	99.3792	-1.33026	6.08826e-12	74.9569	-1.64086	6.44751e-19	86.7789	-1.61429
CGI_10024232	NS	-1.07724	-1.44673	-1.26198	C1q-domain-containing partial	0.6735	defense response to other organism ; response to external stimulus ; defense response ; response to stress	NS	NS	NS	NS	NS	NS	-0.719103	0.00366921	37.1137	NS	-1.06131	4.33612e-06	28.1701	-0.907751	0.000120004	27.0702	-1.26266	8.46871e-10	31.7664	-1.07724	-1.42483	5.83659e-10	27.4588	-1.27655	4.61446e-08	26.2076	-1.63881	3.35294e-15	31.1797	-1.44673
CGI_10026904	NS	-1.07207	-1.57558	-1.32382	complement C1q 4	0.7695	defense response to other organism ; response to external stimulus ; defense response ; response to stress	-0.33486	0.042562	133.253	NS	NS	NS	-0.929654	0.000119965	179.093	NS	-0.911188	2.60189e-10	110.412	-0.836535	1.08424e-08	110.746	-1.46848	1.40966e-10	154.683	-1.07207	-1.41941	9.48243e-12	103.143	-1.35229	6.12809e-11	102.952	-1.95504	1.94013e-13	149.369	-1.57558
CGI_10009789	NS	-1.40173	-2.29449	-1.84811	heavy metal-binding HIP-like isoform X2 [Crassostrea gigas]	0.626	defense response to other organism ; response to external stimulus ; defense response ; response to stress	-0.540281	1.60479e-05	2722.01	NS	NS	NS	-1.32477	2.82622e-23	4008.07	NS	-1.23167	3.41417e-24	2233.02	-0.967653	7.80157e-12	2049.13	-2.00586	2.45532e-51	3476.66	-1.40173	-2.12503	6.91812e-82	2028.13	-1.85689	7.73583e-46	1821.04	-2.90153	3.99689e-117	3328.88	-2.29449
CGI_10007015	NS	-3.72654	-3.30231	-3.51443	Complement C1q 4	0.8245	defense response to other organism ; response to external stimulus ; defense response ; response to stress	-0.667611	0.0444868	38.9259	NS	NS	NS	NS	NS	NS	NS	-4.0703	6.62599e-27	24.0425	-3.53945	1.87295e-19	16.1275	-3.56989	3.45809e-20	15.946	-3.72654	-3.62669	1.12047e-25	25.9915	-3.122	9.24836e-18	17.6833	-3.15824	1.83976e-18	17.4657	-3.30231
CGI_10004270	3.25841	2.15598	3.15549	2.85662	Tripartite motif-containing 3	0.8335	protein modification by small protein conjugation or removal	3.33978	3.46847e-19	12.886	2.80129	1.70387e-14	13.9268	3.63415	8.44305e-21	12.9537	3.25841	2.28859	3.29456e-08	6.41535	1.63124	0.000192609	7.1782	2.54811	5.47866e-10	6.36942	2.15598	3.24464	4.08277e-18	13.4052	2.6697	1.97244e-12	14.4683	3.55212	4.01016e-20	13.4922	3.15549
CGI_10024707	0.709278	1.0642	1.27772	1.01707	Tripartite motif-containing 3	0.8475	protein modification by small protein conjugation or removal	0.404144	0.00224502	163.477	0.830904	3.50053e-10	151.123	0.892787	4.33835e-14	146.061	0.709278	0.763391	2.48509e-07	186.288	1.18102	3.2856e-15	175.311	1.24819	1.84055e-19	170.015	1.0642	0.971664	6.49405e-21	214.488	1.39627	2.3762e-36	203.612	1.46524	1.37521e-50	197.669	1.27772
CGI_10005309	1.21675	1.00264	0.518313	0.912569	Tripartite motif-containing 2 [Crassostrea gigas]	0.909	protein modification by small protein conjugation or removal	1.0511	6.23074e-27	339.267	1.54212	1.83792e-63	320.023	1.05704	1.55125e-33	345.93	1.21675	0.837718	2.59448e-17	299.268	1.32469	6.66805e-48	279.197	0.845509	8.15558e-22	305.404	1.00264	0.354103	0.000779866	256.564	0.840529	9.86473e-20	233.046	0.360305	9.88379e-05	261.571	0.518313
CGI_10002849	0.759244	1.01479	0.915662	0.896564	Tripartite motif-containing 2	0.907	protein modification by small protein conjugation or removal	0.915264	4.60678e-21	227.078	0.798905	7.27739e-23	243.472	0.563563	1.34523e-12	254.301	0.759244	1.17011	3.46334e-33	249.63	1.05188	5.22734e-38	266.718	0.822365	3.1467e-25	276.96	1.01479	1.06912	1.64264e-15	251.916	0.95246	2.14492e-15	269.41	0.725412	9.61991e-10	280.27	0.915662
CGI_10017580	0.776849	1.07346	0.780538	0.87695	Tripartite motif-containing 2	0.824	protein modification by small protein conjugation or removal	0.540163	0.00807108	30.7835	0.52371	0.0141735	32.2196	1.26667	6.93776e-09	26.1518	0.776849	0.843632	1.49414e-05	34.3294	0.820468	5.7495e-05	35.9022	1.55629	3.85981e-13	29.9461	1.07346	0.551631	0.0206021	31.8786	0.529359	0.0366678	33.3445	1.26063	4.60933e-07	27.1373	0.780538
CGI_10003047	0.976421	0.627952	0.590383	0.731585	Tripartite motif-containing 2	0.8495	protein modification by small protein conjugation or removal	0.990233	1.40778e-13	96.6178	0.842701	1.95873e-11	104.226	1.09633	1.83518e-16	96.4523	0.976421	0.642961	3.17939e-05	80.5089	0.492525	0.000835459	87.3589	0.748368	7.52949e-07	80.1435	0.627952	0.605306	2.37749e-05	83.2592	0.453131	0.00094213	90.3882	0.712711	4.14634e-07	82.7808	0.590383
CGI_10015232	0.416775	0.702432	0.569207	0.562804	Tripartite motif-containing 2	0.9778	protein modification by small protein conjugation or removal	0.409053	0.00475198	73.1635	0.309327	0.0387929	78.4976	0.531944	0.00050028	72.0395	0.416775	0.695912	9.29255e-07	80.3575	0.593429	3.43031e-05	85.9131	0.817954	5.22139e-08	79.5128	0.702432	0.562488	4.19836e-05	79.7716	0.459123	0.00104164	85.4061	0.68601	2.52984e-06	78.7245	0.569207
CGI_10011488	0.410201	0.524923	0.510884	0.482003	Tripartite motif-containing 3	0.91	protein modification by small protein conjugation or removal	0.605227	4.61382e-06	153.071	0.26626	0.0278251	176.572	0.359115	0.00167311	168.057	0.410201	0.72034	3.05665e-09	156.757	0.378433	0.000416485	179.949	0.475995	3.36824e-06	171.63	0.524923	0.707058	5.95752e-10	163.835	0.363949	0.000297142	188.173	0.461646	1.55885e-06	179.37	0.510884
CGI_10014734	-0.47143	-0.738975	-0.381742	-0.530716	Tripartite motif-containing 2	0.838	protein modification by small protein conjugation or removal	-0.499869	5.85276e-07	225.932	-0.360912	0.00237306	222.238	-0.553508	9.04432e-08	235.721	-0.47143	-0.768435	5.25313e-13	204.35	-0.630278	2.33667e-07	200.216	-0.818212	6.40725e-14	213.635	-0.738975	-0.40967	0.000150906	237.877	-0.274155	0.0329675	234.373	-0.461402	3.01408e-05	248.028	-0.381742
CGI_10015272	-0.483532	-0.688895	-0.434198	-0.535541	Tripartite motif-containing 2	0.829	protein modification by small protein conjugation or removal	-0.578167	8.99492e-21	598.94	-0.49337	4.20551e-11	601.814	-0.379058	1.75821e-05	563.939	-0.483532	-0.783344	3.72993e-15	550.674	-0.701037	7.71245e-11	552.42	-0.582303	6.6808e-07	516.19	-0.688895	-0.527484	6.14559e-08	622.004	-0.446685	2.53929e-05	625.314	-0.328424	0.0054369	586.225	-0.434198
CGI_10000818	-0.50831	-0.815783	-0.31729	-0.547128	Tripartite motif-containing 2	0.838	protein modification by small protein conjugation or removal	-0.46694	2.09951e-05	385.656	-0.477655	4.23586e-12	402.993	-0.580336	1.24786e-16	411.789	-0.50831	-0.772581	1.61387e-08	344.18	-0.79005	1.20185e-13	359.933	-0.884719	1.35341e-16	369.098	-0.815783	-0.27589	0.037922	418.795	-0.289991	0.0020944	437.557	-0.38599	3.49774e-05	446.05	-0.31729
CGI_10028886	-0.734292	-0.75299	-0.54382	-0.677034	Tripartite motif-containing 3	0.6005	protein modification by small protein conjugation or removal	-0.70384	0.000173427	136.232	-0.830534	3.9433e-07	149.717	-0.668503	8.06303e-05	136.481	-0.734292	-0.722999	2.79855e-07	132.3	-0.852055	6.43871e-14	145.457	-0.683915	6.3907e-09	132.57	-0.75299	-0.515207	0.000204125	147.506	-0.642078	3.8634e-09	161.653	-0.474174	3.24853e-05	147.885	-0.54382
CGI_10001102	-0.67609	-1.12358	-0.520756	-0.773474	Tripartite motif-containing 2	0.911	protein modification by small protein conjugation or removal	-0.713053	1.56426e-11	247.287	-0.405232	1.46763e-05	225.942	-0.909984	7.37839e-25	275.229	-0.67609	-1.15929	8.29916e-22	215.829	-0.857335	2.86898e-15	194.139	-1.35411	5.14972e-38	242.584	-1.12358	-0.557292	8.75303e-07	264.453	-0.252986	0.0166875	243.035	-0.751988	1.18563e-15	293.252	-0.520756
CGI_10020033	-0.825079	-0.715772	-0.961556	-0.834136	Tripartite motif-containing 3	0.758	protein modification by small protein conjugation or removal	-0.613821	0.000402119	46.7937	-0.806617	4.05511e-07	53.0649	-1.0548	4.54423e-13	58.3431	-0.825079	-0.505834	0.0069505	47.0687	-0.699295	3.36751e-05	53.2552	-0.942186	5.39852e-10	58.3609	-0.715772	-0.749297	4.52256e-05	46.1147	-0.94567	2.37352e-08	52.4859	-1.1897	9.31605e-15	57.9023	-0.961556
CGI_10011739	-0.979437	-0.668151	-1.00322	-0.883603	Tripartite motif-containing 2	0.7905	protein modification by small protein conjugation or removal	-0.712669	8.52432e-07	95.2353	-1.12751	1.13787e-15	120.094	-1.09813	6.75819e-21	115.781	-0.979437	-0.402815	0.0076054	101.455	-0.817816	4.22529e-09	126.071	-0.783823	1.5511e-11	121.677	-0.668151	-0.736315	2.89328e-07	96.9754	-1.15317	1.85477e-16	122.491	-1.12018	6.08304e-22	117.999	-1.00322
CGI_10017428	-1.11099	-0.908833	-0.898004	-0.972609	Tripartite motif-containing 2	0.8265	protein modification by small protein conjugation or removal	-1.11868	1.63851e-11	103.359	-1.0786	1.12908e-19	104.471	-1.13569	7.02663e-10	106.603	-1.11099	-0.918651	6.98237e-07	105.101	-0.876432	4.76255e-10	106.41	-0.931415	3.29425e-06	108.371	-0.908833	-0.905216	1.77511e-07	111.28	-0.86721	3.84612e-12	112.678	-0.921585	1.4776e-06	114.716	-0.898004
CGI_10027572	-1.0382	-0.961982	-1.04552	-1.01523	Tripartite motif-containing 2	0.8115	protein modification by small protein conjugation or removal	-1.12307	1.97028e-11	51.9432	-0.661218	0.000402062	43.5212	-1.33032	2.85892e-18	58.644	-1.0382	-1.04543	1.46445e-07	51.252	-0.590804	0.00929762	43.0932	-1.24971	1.84328e-12	57.7895	-0.961982	-1.12951	1.24543e-11	53.1198	-0.67128	0.000300533	44.4879	-1.33577	1.0467e-18	59.9685	-1.04552
CGI_10018280	-0.783481	-1.55246	-0.868496	-1.06815	Tripartite motif-containing 3	0.7065	protein modification by small protein conjugation or removal	-0.889389	0.000397126	56.8505	-0.619083	0.00374339	51.5621	-0.841971	2.81876e-05	55.9156	-0.783481	-1.64104	8.23384e-11	47.0263	-1.40008	8.43081e-11	41.5645	-1.61627	8.22984e-15	45.9602	-1.55246	-0.971815	1.70303e-05	57.2548	-0.706607	0.000122494	51.7953	-0.927066	1.23564e-07	56.2723	-0.868496
CGI_10023039	-2.17889	-0.971848	-0.906932	-1.35256	Tripartite motif-containing 2	0.7765	protein modification by small protein conjugation or removal	-2.46502	2.15147e-22	25.0706	-1.87875	2.06889e-12	17.9368	-2.19291	2.01033e-16	21.614	-2.17889	-1.26642	2.23591e-08	29.457	-0.665182	0.00886411	22.7234	-0.983937	5.72275e-05	26.2002	-0.971848	-1.20251	3.52729e-09	31.4527	-0.595181	0.00940175	24.3784	-0.923105	2.86212e-05	28.0204	-0.906932
CGI_10017827	-2.12102	-1.12088	-1.09863	-1.44684	Tripartite motif-containing 3	0.886	protein modification by small protein conjugation or removal	-2.10326	3.49267e-23	31.9418	-1.81822	1.83578e-14	28.3132	-2.4416	2.34184e-23	41.4412	-2.12102	-1.09476	5.79901e-09	37.1986	-0.816077	0.000199223	33.9304	-1.45181	4.75405e-11	46.5788	-1.12088	-1.06889	4.87293e-09	39.4277	-0.792398	0.000229862	35.9897	-1.43458	6.78863e-11	49.2893	-1.09863
CGI_10009895	-1.36718	-2.16261	-1.14992	-1.5599	Tripartite motif-containing 2	0.8655	protein modification by small protein conjugation or removal	-1.21828	5.82265e-08	39.0976	-1.17685	1.10489e-09	39.3603	-1.70641	1.58246e-19	51.4323	-1.36718	-2.00045	7.27984e-15	32.9427	-1.98869	3.10795e-18	33.0157	-2.4987	3.40587e-29	44.843	-2.16261	-1.00626	3.39974e-07	42.1921	-0.956896	2.47885e-08	42.5574	-1.4866	2.06623e-19	54.8457	-1.14992
CGI_10012860	-1.97347	-1.52567	-1.65563	-1.71826	Tripartite motif-containing 2	0.858	protein modification by small protein conjugation or removal	-2.25163	2.55258e-34	52.9485	-1.97875	1.76489e-23	47.1899	-1.69005	3.45517e-13	39.847	-1.97347	-1.80475	2.334e-22	54.7494	-1.5304	1.92321e-14	49.3037	-1.24186	1.62622e-07	42.0756	-1.52567	-1.9325	8.07675e-31	56.7154	-1.65986	4.07754e-20	50.9415	-1.37454	1.43272e-10	43.3209	-1.65563
CGI_10006396	-1.44227	-2.08229	-4.84631	-2.79029	Tripartite motif-containing 2	0.76	protein modification by small protein conjugation or removal	-1.18798	0.00194835	46.0106	-1.25713	0.000928413	49.3136	-1.88171	1.00149e-07	71.9572	-1.44227	-1.81221	1.46294e-15	41.2107	-1.86917	1.54315e-16	44.3111	-2.56548	2.23803e-35	66.3792	-2.08229	-4.56777	2.0172e-44	35.1549	-4.65836	5.61362e-45	38.0875	-5.31282	2.54025e-62	61.4484	-4.84631
CGI_10006650	-5.89147	-1.3425	-1.18059	-2.80485	Tripartite motif-containing 2	0.745	protein modification by small protein conjugation or removal	-5.8365	6.63902e-60	54.9901	-6.22806	7.24941e-66	77.0467	-5.60985	2.94162e-49	50.8231	-5.89147	-1.26568	1.64203e-16	75.2158	-1.67205	8.11084e-25	97.6264	-1.08977	5.50569e-07	71.621	-1.3425	-1.09642	8.44253e-07	81.3571	-1.50301	8.1887e-12	105.03	-0.942354	0.000456127	77.5793	-1.18059
CGI_10019305	-3.009	-2.02975	-3.52084	-2.8532	Tripartite motif-containing 3	0.8115	protein modification by small protein conjugation or removal	-1.95652	5.66744e-11	18.0069	-2.99947	5.09305e-29	36.2367	-4.07101	1.70142e-54	76.7121	-3.009	-1.30141	0.00268833	18.4031	-2.21173	5.43738e-09	36.2133	-2.5761	9.00784e-10	75.5606	-2.02975	-2.48044	3.23305e-15	17.1808	-3.5176	1.00955e-34	35.8379	-4.56449	3.76609e-60	77.2844	-3.52084
CGI_10004869	-4.89856	-4.1549	-3.61101	-4.22149	G2 M phase-specific E3 ubiquitin- ligase [Anser cygnoides domesticus]	0.5965	protein modification by small protein conjugation or removal	-5.7411	3.07145e-88	125.504	-5.24336	2.747e-58	100.778	-3.71123	2.90557e-30	26.6414	-4.89856	-5.27978	1.52704e-78	122.605	-4.05522	1.60983e-26	98.6816	-3.12971	2.26284e-21	26.3806	-4.1549	-4.49457	8.58767e-91	131.809	-4.00035	1.86253e-49	106.699	-2.33811	1.81842e-20	30.539	-3.61101
CGI_10006147	4.44614	3.62121	NS	4.03368	tripartite motif-containing 45-like	0.557	protein modification by small protein conjugation or removal	4.72584	2.67355e-42	41.715	3.17605	8.53071e-36	46.8194	5.43653	5.59308e-46	42.0725	4.44614	3.88217	7.06513e-26	25.317	2.4176	3.09758e-17	29.6354	4.56386	1.95387e-33	25.3753	3.62121	NS	NS	NS	-2.60741	1.0377e-08	4.00708	NS	NS	NS	NS
CGI_10013269	3.03342	2.87494	NS	2.95418	Tripartite motif-containing 2	0.8135	protein modification by small protein conjugation or removal	3.99582	2.87617e-91	104.406	1.34283	4.44146e-20	142.806	3.76159	1.27996e-96	107.729	3.03342	3.83157	2.34513e-80	92.859	1.19723	3.77251e-15	129.855	3.59602	1.44952e-85	96.0434	2.87494	NS	NS	NS	-3.25002	1.11047e-36	44.0268	-0.899768	0.00833177	10.0175	NS
CGI_10004551	3.15266	2.17343	NS	2.66304	Tripartite motif-containing 2	0.7635	protein modification by small protein conjugation or removal	1.62785	5.71104e-06	48.1984	3.1254	6.0835e-24	43.3084	4.70472	1.12948e-39	39.7453	3.15266	0.913991	0.0373949	31.9731	2.09211	9.93957e-08	26.5852	3.51418	2.83979e-19	23.4415	2.17343	NS	NS	NS	2.02151	5.64904e-07	25.8081	3.51297	6.73314e-18	22.5407	NS
CGI_10004368	2.13755	1.92599	NS	2.03177	Tripartite motif-containing 2	0.86	protein modification by small protein conjugation or removal	3.45281	6.59483e-27	27.3623	1.31785	4.32467e-07	36.993	1.64199	3.20762e-11	34.1888	2.13755	3.25074	1.54421e-25	23.0257	1.10073	1.04074e-05	32.2558	1.42652	1.14848e-09	29.6287	1.92599	NS	NS	NS	-2.62751	4.76297e-12	11.1836	-2.40015	2.81917e-10	8.80866	NS
CGI_10011033	1.77174	1.65896	NS	1.71535	Tripartite motif-containing 2	0.713	protein modification by small protein conjugation or removal	2.55232	1.97735e-49	83.789	1.74237	7.9813e-29	97.0078	1.02054	9.86023e-13	109.708	1.77174	2.44122	5.72078e-49	76.3223	1.62557	5.64911e-28	88.9346	0.910089	1.64327e-11	101.517	1.65896	1.60787	1.46004e-18	49.6256	0.789843	3.84791e-06	61.6575	NS	NS	NS	NS
CGI_10028041	1.69806	1.68575	NS	1.69191	Tripartite motif-containing 3	0.6185	protein modification by small protein conjugation or removal	2.30514	2.19823e-45	175.459	1.03375	7.3052e-13	226.792	1.7553	5.71652e-63	194.22	1.69806	2.28932	7.3047e-43	170.363	1.02122	5.78602e-12	220.297	1.74673	2.48385e-57	188.793	1.68575	0.884393	0.000150304	84.4647	NS	NS	NS	NS	NS	NS	NS
CGI_10011537	1.34694	1.34111	NS	1.34402	Tripartite motif-containing 3	0.8355	protein modification by small protein conjugation or removal	0.680594	0.0285782	18.8876	1.10689	0.000186909	17.5297	2.25333	5.92371e-10	13.8617	1.34694	0.684665	0.0208765	18.403	1.09744	0.000100572	17.0762	2.24121	4.26747e-11	13.532	1.34111	NS	NS	NS	NS	NS	NS	1.41364	0.000486895	8.32745	NS
CGI_10016829	1.46523	1.21426	NS	1.33975	Tripartite motif-containing 2	0.726	protein modification by small protein conjugation or removal	1.00355	3.17182e-06	37.503	1.22345	1.68935e-09	37.3475	2.16868	1.69806e-20	31.025	1.46523	0.764792	0.00146627	32.5799	0.974437	1.28955e-05	32.26	1.90356	1.51205e-14	26.2249	1.21426	-1.22362	1.61977e-05	17.2327	-1.04211	0.000220419	16.2179	NS	NS	NS	NS
CGI_10022659	1.13397	1.38234	NS	1.25815	Tripartite motif-containing 3	0.8483	protein modification by small protein conjugation or removal	1.36304	3.76931e-12	120.95	0.673742	1.62525e-05	148.778	1.36512	9.68926e-20	124.206	1.13397	1.6088	5.02606e-18	134.613	0.920947	1.37964e-10	162.364	1.61727	3.9233e-31	138.279	1.38234	1.0204	1.68638e-05	105.34	NS	NS	NS	1.01843	3.15579e-07	108.314	NS
CGI_10018963	1.13539	1.25124	NS	1.19331	Tripartite motif-containing 38	0.787	protein modification by small protein conjugation or removal	0.519084	0.00284277	56.1729	1.72113	2.63803e-16	44.4502	1.16595	6.78352e-09	48.4741	1.13539	0.638116	8.77697e-05	57.7405	1.83115	3.48162e-20	46.4313	1.28445	1.14179e-11	50.3581	1.25124	NS	NS	NS	1.17973	3.06033e-08	34.0425	0.628879	0.00267064	38.4146	NS
CGI_10020821	1.48495	0.795721	NS	1.14034	Tripartite motif-containing 45 [Crassostrea gigas]	0.8745	protein modification by small protein conjugation or removal	1.24535	2.54154e-67	550.291	1.64338	3.66958e-106	531.594	1.56613	1.13324e-89	528.192	1.48495	0.558813	1.51342e-06	393.256	0.949832	4.04497e-17	369.168	0.878516	2.48778e-14	369.075	0.795721	NS	NS	NS	0.233055	0.0108744	286.132	NS	NS	NS	NS
CGI_10004269	1.15521	1.11447	NS	1.13484	Tripartite motif-containing 3	0.905	protein modification by small protein conjugation or removal	1.69098	5.08275e-45	174.455	1.0653	1.39838e-25	205.311	0.709335	6.24198e-12	219.657	1.15521	1.64681	4.22748e-35	166.753	1.02253	4.31732e-19	196.616	0.674068	4.65181e-09	210.809	1.11447	0.989015	8.95449e-16	125.108	0.356709	0.00118	154.499	NS	NS	NS	NS
CGI_10017411	1.30573	0.96033	NS	1.13303	Tripartite motif-containing 2	0.852	protein modification by small protein conjugation or removal	1.16851	3.20062e-16	124.419	1.31438	3.97936e-16	125.574	1.43431	1.28601e-21	120.198	1.30573	0.824424	1.89495e-08	102.922	0.966417	4.62717e-09	103.276	1.09015	8.77236e-13	98.5344	0.96033	-0.551268	0.000214247	64.7803	-0.398407	0.0284718	63.4012	NS	NS	NS	NS
CGI_10001135	1.05475	1.18291	NS	1.11883	Tripartite motif-containing 2	0.8495	protein modification by small protein conjugation or removal	0.723848	0.000250874	48.5494	0.655737	0.00411784	51.3352	1.78465	1.01989e-17	39.5279	1.05475	0.86247	5.41493e-05	50.7327	0.788511	0.00104908	53.5918	1.89776	1.21789e-17	42.0629	1.18291	NS	NS	NS	NS	NS	NS	0.775358	0.00188378	24.0358	NS
CGI_10025793	1.08594	1.0513	NS	1.06862	Tripartite motif-containing 2	0.9335	protein modification by small protein conjugation or removal	1.04442	1.91441e-11	59.0089	0.494641	0.000798714	71.0221	1.71875	2.63035e-24	52.7223	1.08594	1.01267	1.10723e-07	57.2553	0.469793	0.0129679	68.9394	1.67145	2.24379e-17	51.176	1.0513	0.448915	0.0128559	46.4599	NS	NS	NS	1.12414	7.3544e-10	39.7411	NS
CGI_10025337	0.651401	1.31859	NS	0.984998	Tripartite motif-containing 3	0.7925	protein modification by small protein conjugation or removal	0.878915	4.2399e-08	54.2992	0.629662	0.000206882	60.3495	0.445627	0.0186265	62.3933	0.651401	1.54534	1.59643e-17	74.8414	1.29487	3.22548e-12	81.5987	1.11557	9.8009e-09	83.2354	1.31859	NS	NS	NS	NS	NS	NS	NS	NS	NS	NS
CGI_10011985	0.884911	0.879911	NS	0.882411	Tripartite motif-containing 45	0.6195	protein modification by small protein conjugation or removal	0.883809	1.17316e-07	89.2815	0.991507	7.83378e-08	90.5323	0.779417	3.11269e-06	93.5779	0.884911	0.880248	1.14784e-09	86.5767	0.984255	1.87918e-09	87.7576	0.775228	7.93628e-08	90.8113	0.879911	NS	NS	NS	NS	NS	NS	NS	NS	NS	NS
CGI_10002891	0.743937	0.999564	NS	0.87175	Tripartite motif-containing 3	0.612	protein modification by small protein conjugation or removal	0.476169	0.00139036	79.9801	1.0363	3.3814e-12	71.7871	0.719337	3.4426e-06	76.0766	0.743937	0.73358	5.99505e-08	86.98	1.28818	2.8634e-20	79.3541	0.976929	6.21014e-12	83.4359	0.999564	NS	NS	NS	NS	NS	NS	NS	NS	NS	NS
CGI_10020936	0.870683	0.866194	NS	0.868438	Tripartite motif-containing 2	0.7835	protein modification by small protein conjugation or removal	0.897392	7.48824e-07	66.2299	1.09017	4.25085e-10	65.8968	0.624485	0.000111418	72.8443	0.870683	0.894538	1.30066e-06	64.6538	1.08072	1.11e-09	64.3197	0.623328	0.000143695	71.1372	0.866194	NS	NS	NS	NS	NS	NS	-0.45882	0.0137538	49.9547	NS
CGI_10006172	0.64755	1.03343	NS	0.840492	Tripartite motif-containing 2	0.7095	protein modification by small protein conjugation or removal	0.614698	5.56226e-05	139.189	0.483351	0.0025815	150.485	0.844601	2.67073e-07	133.584	0.64755	1.00056	1.14606e-26	160.272	0.864421	3.41416e-19	172.224	1.23532	3.99904e-31	155.443	1.03343	-0.727865	1.45772e-08	89.3272	-0.862762	7.46747e-11	98.7427	-0.488978	0.00169298	82.4673	-0.693202
CGI_10005584	0.895649	0.758957	NS	0.827303	Tripartite motif-containing 3	0.7595	protein modification by small protein conjugation or removal	1.01371	1.18871e-09	220.387	0.966466	1.98756e-17	233.173	0.706769	1.03992e-09	244.011	0.895649	0.878792	1.02407e-06	201.918	0.825132	3.26572e-10	213.802	0.572948	2.17172e-05	224.814	0.758957	NS	NS	NS	NS	NS	NS	NS	NS	NS	NS
CGI_10003231	1.05784	0.560781	NS	0.809309	Tripartite motif-containing 3	0.5445	protein modification by small protein conjugation or removal	0.874509	1.60508e-14	541.723	0.957375	1.01096e-16	552.785	1.34162	1.54755e-38	499.001	1.05784	0.379762	0.00687436	426.983	0.458523	0.000864523	433.667	0.844057	2.46384e-12	383.668	0.560781	NS	NS	NS	NS	NS	NS	0.449223	0.0001295	339.901	NS
CGI_10008132	0.677104	0.840901	NS	0.759003	Tripartite motif-containing 2	0.8385	protein modification by small protein conjugation or removal	0.292171	0.031978	91.2604	0.956468	9.11454e-14	78.9571	0.782674	9.86533e-10	80.9284	0.677104	0.459051	0.00106677	95.1337	1.11562	3.13826e-16	83.404	0.948037	2.25667e-12	85.2788	0.840901	NS	NS	NS	NS	NS	NS	NS	NS	NS	NS
CGI_10022493	0.698435	0.794218	NS	0.746326	Tripartite motif-containing 2	0.8595	protein modification by small protein conjugation or removal	0.786687	1.37175e-11	99.2629	0.728001	7.05367e-10	104.864	0.580618	2.03469e-05	107.025	0.698435	0.882532	2.25366e-11	101.328	0.821043	8.08592e-10	106.959	0.679077	7.12661e-06	109.078	0.794218	NS	NS	NS	NS	NS	NS	-0.377585	0.0389898	77.0853	NS
CGI_10020299	0.575006	0.844124	NS	0.709565	hypothetical protein CGI_10020299	0.588	protein modification by small protein conjugation or removal	0.714905	1.48782e-05	138.82	0.481488	0.0067097	154.305	0.528624	0.00175414	149.243	0.575006	0.984262	1.79247e-09	153.31	0.747591	1.39209e-05	169.126	0.800518	1.09995e-06	163.97	0.844124	-1.90643	2.89161e-23	66.5743	-2.13855	6.0942e-28	79.4446	-2.09698	1.5085e-28	75.6948	-2.04732
CGI_10004336	0.483187	0.799247	NS	0.641217	Tripartite motif-containing 3	0.909	protein modification by small protein conjugation or removal	0.497214	2.47245e-06	390.468	0.617018	8.23266e-08	392.985	0.33533	0.0104357	418.539	0.483187	0.814293	9.03614e-22	435.135	0.930852	4.62933e-22	439.737	0.652595	9.13778e-10	463.898	0.799247	0.31375	0.00631798	371.685	0.429673	0.000459255	373.019	NS	NS	NS	NS
CGI_10010269	0.585836	0.570928	NS	0.578382	Tripartite motif-containing 2	0.8765	protein modification by small protein conjugation or removal	0.714457	3.90412e-20	332.924	0.430198	1.20999e-08	375.073	0.612853	3.7549e-13	349.24	0.585836	0.698684	4.81131e-11	322.518	0.414519	8.9463e-05	363.505	0.599582	5.97276e-08	338.626	0.570928	NS	NS	NS	NS	NS	NS	NS	NS	NS	NS
CGI_10015673	0.462378	0.474033	NS	0.468205	Tripartite motif-containing 2 [Crassostrea gigas]	0.911	protein modification by small protein conjugation or removal	0.756086	4.54765e-09	107.347	0.301081	0.0158058	127.416	0.329967	0.00546258	123.858	0.462378	0.767571	1.80718e-09	105.099	0.310198	0.01258	124.656	0.34433	0.00324878	121.26	0.474033	0.573498	1.64715e-05	101.709	NS	NS	NS	NS	NS	NS	NS
CGI_10025533	0.354802	0.529598	NS	0.4422	transmembrane 232-like	0.6375	protein modification by small protein conjugation or removal	0.354403	9.20437e-05	452.971	0.443659	7.69071e-07	458.621	0.266343	0.0110235	474.918	0.354802	0.529449	4.48634e-09	473.505	0.615722	1.07293e-11	480.356	0.443624	1.05028e-05	495.9	0.529598	NS	NS	NS	NS	NS	NS	NS	NS	NS	NS
CGI_10027952	0.331281	0.511674	NS	0.421478	Tripartite motif-containing 2	0.9095	protein modification by small protein conjugation or removal	0.288455	0.0314054	127.074	0.337988	0.00880125	130.177	0.3674	0.00368481	126.519	0.331281	0.468986	9.10196e-05	132.82	0.515674	1.01504e-05	136.21	0.550363	1.58867e-06	132.568	0.511674	NS	NS	NS	0.298232	0.0227814	131.363	0.333136	0.00820267	127.677	NS
CGI_10028138	0.330873	0.348787	NS	0.33983	Tripartite motif-containing 2	0.6115	protein modification by small protein conjugation or removal	0.442391	9.13597e-07	416.684	0.266798	0.000312547	457.47	0.28343	0.0249875	445.757	0.330873	0.460102	1.21324e-06	408.687	0.282424	0.000365192	448.564	0.303836	0.018494	437.385	0.348787	NS	NS	NS	NS	NS	NS	NS	NS	NS	NS
CGI_10002867	0.343052	0.313691	NS	0.328371	tripartite motif-containing 3-like	0.4715	protein modification by small protein conjugation or removal	0.318865	0.0327757	133.581	0.299799	0.021524	139.928	0.410491	0.00319418	132.631	0.343052	0.289638	0.0377297	128.43	0.267691	0.0279884	134.549	0.383745	0.00264969	127.56	0.313691	NS	NS	NS	NS	NS	NS	NS	NS	NS	NS
CGI_10010164	0.383137	0.273046	NS	0.328092	ubiquitin carboxyl-terminal hydrolase 38	0.5545	protein modification by small protein conjugation or removal	0.333445	0.000336503	311.299	0.475946	2.19135e-06	310.229	0.340021	0.000562456	317.071	0.383137	0.223529	0.00807618	290.373	0.36302	5.73731e-05	288.82	0.232589	0.00895834	295.912	0.273046	NS	NS	NS	0.288698	0.00126402	295.336	NS	NS	NS	NS
CGI_10011500	-0.543739	-0.423859	NS	-0.483799	Tripartite motif-containing 3	0.871	protein modification by small protein conjugation or removal	-0.401108	0.000781826	277.23	-0.484136	1.28984e-08	297.984	-0.745974	5.85762e-22	326.614	-0.543739	-0.281861	0.0224204	280.044	-0.366745	1.51284e-05	300.731	-0.62297	1.20909e-16	328.429	-0.423859	0.262062	0.0317534	356.694	0.181435	0.0474662	380.829	NS	NS	NS	NS
CGI_10022394	-0.494375	-0.523796	NS	-0.509085	Tripartite motif-containing 2	0.849	protein modification by small protein conjugation or removal	-0.290703	0.0244935	252.028	-0.227786	0.00603573	255.707	-0.964635	2.04321e-24	342.551	-0.494375	-0.321719	0.0292687	242.677	-0.260687	0.0134935	246.209	-0.988981	1.94337e-19	330.836	-0.523796	0.407844	0.0200503	332.928	0.474072	0.000781739	339.573	NS	NS	NS	NS
CGI_10019741	-0.610174	-0.561738	NS	-0.585956	Tripartite motif-containing 2 [Crassostrea gigas]	0.7495	protein modification by small protein conjugation or removal	-0.529263	4.21329e-07	201.684	-0.738375	9.87067e-17	229.413	-0.562886	6.29104e-08	208.595	-0.610174	-0.481249	3.83271e-06	199.03	-0.692123	2.84278e-15	226.213	-0.511843	6.44058e-07	205.906	-0.561738	0.5608	1.29774e-08	303.517	0.351914	7.79004e-05	335.785	0.52957	7.63909e-08	312.606	0.480762
CGI_10001710	-0.581687	-0.596948	NS	-0.589317	Tripartite motif-containing 2	0.8595	protein modification by small protein conjugation or removal	-0.520779	2.34197e-05	181.062	-0.502805	1.21294e-07	186.785	-0.721476	1.05344e-10	201.001	-0.581687	-0.536951	0.000375128	175.064	-0.521814	2.84996e-05	180.647	-0.732078	9.05548e-08	194.518	-0.596948	NS	NS	NS	NS	NS	NS	NS	NS	NS	NS
CGI_10018151	-0.739728	-0.636098	NS	-0.687913	Tripartite motif-containing 45	0.614	protein modification by small protein conjugation or removal	-1.17655	1.32896e-43	200.375	-0.691949	9.876e-08	167.63	-0.350681	0.00149798	142.475	-0.739728	-1.07195	5.28364e-34	199.452	-0.591101	9.7983e-06	167.812	-0.245244	0.0398778	143.25	-0.636098	-0.51206	9.60052e-06	242.084	NS	NS	NS	0.305803	0.0276291	183.496	NS
CGI_10019322	-0.683316	-0.718262	NS	-0.700789	Tripartite motif-containing 3	0.8215	protein modification by small protein conjugation or removal	-0.446159	0.00365979	90.4551	-0.658112	1.70774e-06	102.783	-0.945677	2.11439e-10	115.14	-0.683316	-0.482826	0.002254	86.8941	-0.694972	1.07337e-06	98.9013	-0.976989	9.75186e-11	110.93	-0.718262	NS	NS	NS	-0.283759	0.0342333	117.761	-0.569902	4.15031e-05	130.157	NS
CGI_10025434	-0.671645	-0.82264	NS	-0.747142	ubiquitin-like-conjugating enzyme ATG10	0.657	protein modification by small protein conjugation or removal	-0.3642	0.0203608	371.024	-0.685372	2.50853e-05	442.709	-0.965361	5.47361e-13	491.622	-0.671645	-0.512553	4.56044e-07	345.909	-0.837128	9.99141e-12	415.171	-1.11824	1.89194e-39	463.073	-0.82264	0.505172	9.63471e-07	520.243	NS	NS	NS	NS	NS	NS	NS
CGI_10001250	-0.698503	-0.840884	NS	-0.769694	Tripartite motif-containing 2	0.8465	protein modification by small protein conjugation or removal	-0.806468	9.99025e-11	295.974	-0.427653	0.00010117	261.574	-0.861388	1.08824e-12	309.272	-0.698503	-0.949075	1.81341e-13	277.726	-0.573439	6.66094e-07	243.928	-1.00014	1.18586e-15	290.546	-0.840884	NS	NS	NS	0.211872	0.0432404	333.219	NS	NS	NS	NS
CGI_10015538	-0.654753	-0.908583	NS	-0.781668	Tripartite motif-containing 45	0.609	protein modification by small protein conjugation or removal	-0.468184	0.0118322	46.3211	-0.700999	0.00012713	53.3594	-0.795076	3.99333e-06	54.64	-0.654753	-0.724651	8.1585e-05	41.9828	-0.955521	1.72947e-07	48.7291	-1.04558	1.66035e-09	50.0276	-0.908583	NS	NS	NS	-0.398799	0.0261795	59.7162	-0.487059	0.0030946	60.9109	NS
CGI_10008591	-0.88882	-0.810205	NS	-0.849513	Tripartite motif-containing 3	0.898	protein modification by small protein conjugation or removal	-1.16804	1.41297e-25	177.542	-0.598524	1.41005e-07	142.407	-0.899896	4.31043e-11	160.067	-0.88882	-1.08874	2.18111e-20	175.484	-0.522615	1.87944e-05	141.44	-0.819256	7.50759e-09	158.582	-0.810205	-0.522719	6.79669e-07	213.878	NS	NS	NS	NS	NS	NS	NS
CGI_10007161	-1.07393	-0.659868	NS	-0.866897	Tripartite motif-containing 3	0.6895	protein modification by small protein conjugation or removal	-0.950129	4.06956e-08	151.44	-0.872995	1.57896e-09	151.26	-1.39865	3.11083e-18	193.141	-1.07393	-0.539505	0.00601176	164.228	-0.46037	0.00718512	164.76	-0.97973	1.45304e-08	205.187	-0.659868	NS	NS	NS	0.352075	0.00140769	229.967	NS	NS	NS	NS
CGI_10017777	-0.942561	-0.792991	NS	-0.867776	Tripartite motif-containing 3	0.7445	protein modification by small protein conjugation or removal	-1.12302	1.91441e-11	184.449	-1.04757	3.0405e-19	183.145	-0.657088	2.3091e-07	150.515	-0.942561	-0.974436	1.57188e-08	185.628	-0.898928	4.64615e-13	184.669	-0.50561	0.000219973	152.759	-0.792991	NS	NS	NS	NS	NS	NS	0.343073	0.000607362	214.515	NS
CGI_10013768	-0.763459	-1.12766	NS	-0.945561	Tripartite motif-containing 3	0.758	protein modification by small protein conjugation or removal	-1.59764	2.16032e-99	792.938	-0.206649	0.0492423	438.931	-0.486085	1.36529e-09	480.162	-0.763459	-1.95423	2.60022e-69	727.85	-0.578054	1.16825e-05	381.617	-0.850705	3.45699e-13	422.654	-1.12766	-0.871228	2.90829e-13	943.255	0.499647	0.000228135	585.584	NS	NS	NS	NS
CGI_10021500	-1.06581	-0.982095	NS	-1.02395	Tripartite motif-containing 2	0.833	protein modification by small protein conjugation or removal	-0.670017	8.73335e-12	281.172	-1.0455	1.65894e-52	345.988	-1.48193	1.71827e-43	423.334	-1.06581	-0.597139	0.00159878	277.595	-0.964353	4.0902e-09	341.013	-1.38479	2.33896e-15	416.095	-0.982095	NS	NS	NS	-0.551358	3.88118e-06	401.781	-0.982761	2.35547e-12	479.958	NS
CGI_10014606	-0.92354	-1.22539	NS	-1.07447	Tripartite motif-containing 3	0.8175	protein modification by small protein conjugation or removal	-0.502642	0.0254384	43.7874	-1.36741	1.77089e-17	68.2884	-0.900572	1.29238e-07	53.1387	-0.92354	-0.808288	0.001232	38.8216	-1.66689	1.01911e-18	62.5566	-1.201	1.78586e-09	47.8567	-1.22539	NS	NS	NS	-0.937385	1.71011e-07	76.8244	-0.470067	0.0182238	61.141	NS
CGI_10014949	-1.14139	-1.05055	NS	-1.09597	Tripartite motif-containing 3	0.854	protein modification by small protein conjugation or removal	-1.3487	4.8344e-24	178.005	-0.601951	1.20746e-07	129.914	-1.47352	1.06387e-19	195.102	-1.14139	-1.25889	2.12945e-21	176.396	-0.515048	9.24578e-06	129.755	-1.37771	7.81006e-18	193.127	-1.05055	NS	NS	NS	0.513072	2.97359e-08	196.172	-0.374979	0.01997	261.803	NS
CGI_10022497	-0.95429	-1.28084	NS	-1.11757	Tripartite motif-containing 2	0.892	protein modification by small protein conjugation or removal	-0.894301	3.66133e-12	105.191	-1.29954	8.6848e-17	134.152	-0.669024	2.33089e-06	97.1963	-0.95429	-1.22425	6.70957e-19	94.8042	-1.62273	1.99494e-23	122.769	-0.995543	1.91739e-11	86.8918	-1.28084	NS	NS	NS	-0.419115	0.0111288	171.669	NS	NS	NS	NS
CGI_10014008	-1.26033	-1.00976	NS	-1.13504	Tripartite motif-containing 2	0.7415	protein modification by small protein conjugation or removal	-1.08791	0.00730164	7.0803	-1.36003	0.00104488	8.98567	-1.33304	0.000470742	8.25629	-1.26033	-0.845053	0.0308276	7.35918	-1.12284	0.00365455	9.2359	-1.06137	0.00323001	8.51376	-1.00976	NS	NS	NS	NS	NS	NS	NS	NS	NS	NS
CGI_10015215	-1.51561	-1.00667	NS	-1.26114	Tripartite motif-containing 3	0.8755	protein modification by small protein conjugation or removal	-1.22393	8.68511e-05	12.6403	-1.76404	1.68618e-09	17.9331	-1.55888	4.32336e-08	15.428	-1.51561	-0.726342	0.0241068	13.8931	-1.25291	1.26271e-05	19.1216	-1.04076	0.00019839	16.6435	-1.00667	NS	NS	NS	-0.531849	0.0454132	24.4219	NS	NS	NS	NS
CGI_10021379	-1.62736	-0.932172	NS	-1.27977	Tripartite motif-containing 3	0.85	protein modification by small protein conjugation or removal	-1.51914	1.95526e-09	68.9971	-1.1828	2.91845e-11	57.8392	-2.18014	1.25526e-31	99.3096	-1.62736	-0.845833	0.00187276	77.7738	-0.482065	0.0249405	67.3606	-1.46862	9.16262e-14	107.502	-0.932172	NS	NS	NS	0.492831	0.0124589	100.997	-0.508772	0.0134328	142.707	NS
CGI_10005547	-1.39154	-1.32969	NS	-1.36062	Tripartite motif-containing 3	0.82	protein modification by small protein conjugation or removal	-1.12109	1.13593e-07	78.0443	-1.94913	8.5176e-47	123.749	-1.1044	3.89341e-07	78.9246	-1.39154	-1.06246	2.47224e-06	76.7802	-1.88816	4.63297e-37	121.385	-1.03845	6.79464e-06	77.6606	-1.32969	NS	NS	NS	-0.655742	7.11726e-05	165.017	NS	NS	NS	NS
CGI_10008229	-1.498	-1.29227	NS	-1.39514	Tripartite motif-containing 2	0.7705	protein modification by small protein conjugation or removal	-1.41656	5.15686e-28	151.071	-1.40374	2.59291e-26	156.248	-1.67371	4.38557e-39	176.538	-1.498	-1.2122	3.64198e-26	153.157	-1.19961	2.46238e-24	158.538	-1.465	3.98471e-38	178.106	-1.29227	-0.219858	0.0419718	210.64	NS	NS	NS	-0.47524	1.66223e-06	237.848	NS
CGI_10022499	-1.73392	-1.0671	NS	-1.40051	Tripartite motif-containing 2	0.8235	protein modification by small protein conjugation or removal	-1.07318	1.77862e-08	36.2919	-1.64679	1.11148e-21	50.7944	-2.48179	4.51556e-52	80.831	-1.73392	-0.411161	0.0397084	42.1773	-0.980302	2.38394e-09	56.6076	-1.80984	6.65525e-33	85.6917	-1.0671	0.431063	0.00952511	60.392	NS	NS	NS	-0.977741	2.71926e-13	106.499	NS
CGI_10003706	-1.42379	-1.39511	NS	-1.40945	Tripartite motif-containing 2	0.865	protein modification by small protein conjugation or removal	-1.35253	2.34309e-09	56.0734	-1.72129	9.98802e-16	71.3034	-1.19756	1.71657e-06	52.925	-1.42379	-1.32966	1.30226e-05	53.7889	-1.68072	4.30931e-09	68.6277	-1.17494	0.000233276	50.7146	-1.39511	NS	NS	NS	-0.82716	0.000129242	88.1548	NS	NS	NS	NS
CGI_10014699	-1.36138	-1.45902	NS	-1.4102	Tripartite motif-containing 2	0.788	protein modification by small protein conjugation or removal	-0.860961	6.00731e-06	41.9598	-1.82617	4.32357e-31	71.5111	-1.397	3.15331e-13	56.1173	-1.36138	-0.964237	1.38861e-06	39.7218	-1.92425	2.8006e-31	68.4952	-1.48858	6.11692e-14	53.4893	-1.45902	NS	NS	NS	-1.28012	4.14539e-17	80.754	-0.855196	8.03829e-06	64.7775	NS
CGI_10012975	-1.39611	-1.44354	NS	-1.41983	Tripartite motif-containing 2	0.7145	protein modification by small protein conjugation or removal	-1.38018	4.67705e-11	41.3222	-2.04548	3.88506e-20	63.6011	-0.76268	0.000575372	31.0274	-1.39611	-1.43129	5.43018e-11	39.6367	-2.08481	3.02482e-20	61.3457	-0.814534	0.000416677	29.6124	-1.44354	-0.769322	9.86607e-05	48.7617	-1.44524	2.76445e-12	71.8906	NS	NS	NS	NS
CGI_10006087	-1.31756	-1.63345	NS	-1.47551	Tripartite motif-containing 3	0.6685	protein modification by small protein conjugation or removal	-2.56063	4.99588e-102	142.707	-0.675112	0.000367225	55.0491	-0.716949	6.90127e-05	54.9393	-1.31756	-2.87835	1.65615e-97	134.778	-0.991826	2.17228e-06	49.2968	-1.03019	2.74004e-07	49.2685	-1.63345	-0.287986	0.0296129	228.359	1.55783	1.99139e-22	141.745	1.52725	3.11094e-23	140.112	0.932368
CGI_10017378	-1.26807	-1.73917	NS	-1.50362	Tripartite motif-containing 3	0.8265	protein modification by small protein conjugation or removal	-1.51903	2.00325e-10	48.035	-0.871699	0.000380587	35.2675	-1.41348	4.71002e-13	45.152	-1.26807	-1.98612	7.60484e-17	43.3142	-1.34413	2.59198e-08	30.7677	-1.88727	8.46691e-21	40.4356	-1.73917	NS	NS	NS	NS	NS	NS	NS	NS	NS	NS
CGI_10025268	-1.12547	-2.06161	NS	-1.59354	Tripartite motif-containing 3	0.832	protein modification by small protein conjugation or removal	-1.4143	2.71511e-18	72.7803	-1.0443	1.25251e-10	62.724	-0.917799	3.28814e-07	58.0271	-1.12547	-2.34771	2.91089e-30	61.0079	-1.98783	4.99644e-22	50.8617	-1.84929	5.0254e-17	46.4473	-2.06161	-0.613564	0.000158454	89.9529	NS	NS	NS	NS	NS	NS	NS
CGI_10012858	-1.73855	-1.61056	NS	-1.67456	Tripartite motif-containing 2	0.8815	protein modification by small protein conjugation or removal	-1.12846	0.00184684	8.04398	-2.12253	2.58309e-10	15.7885	-1.96466	2.43772e-08	14.2607	-1.73855	-1.04557	0.00816276	7.86932	-1.97613	2.39189e-08	15.42	-1.80999	1.03066e-06	13.9222	-1.61056	NS	NS	NS	-1.04902	0.000387484	19.8564	-0.907671	0.00425322	18.2062	NS
CGI_10003053	-1.95669	-1.71321	NS	-1.83495	Tripartite motif-containing 2	0.858	protein modification by small protein conjugation or removal	-2.74424	5.98394e-63	124.627	-1.2753	4.4332e-11	55.8276	-1.85053	8.38503e-26	74.5157	-1.95669	-2.44422	8.99864e-19	122.181	-1.08609	0.000667146	55.275	-1.60932	3.90012e-08	73.4411	-1.71321	-1.4873	2.98085e-19	150.549	NS	NS	NS	-0.596534	0.00162077	99.6409	NS
CGI_10003894	-2.52118	-1.36545	NS	-1.94332	Tripartite motif-containing 3	0.888	protein modification by small protein conjugation or removal	-2.59402	1.08204e-21	26.0224	-2.87243	1.91364e-16	39.0549	-2.0971	2.20982e-11	19.8858	-2.52118	-1.39576	1.10723e-07	29.9764	-1.77577	8.1909e-08	42.879	-0.924821	0.00288791	24.0977	-1.36545	0.523985	0.0177298	58.0998	NS	NS	NS	0.974728	3.13495e-05	52.4685	NS
CGI_10012869	-2.2992	-1.72988	NS	-2.01454	G2 M phase-specific E3 ubiquitin- ligase-like	0.5455	protein modification by small protein conjugation or removal	-1.55464	1.98814e-17	42.0677	-1.83016	9.27706e-23	51.0702	-3.5128	3.41371e-100	141.38	-2.2992	-0.98768	2.13791e-08	46.0177	-1.2626	9.0959e-13	55.0195	-2.93936	1.94734e-83	142.772	-1.72988	NS	NS	NS	-0.598954	0.000260569	68.2481	-2.28704	1.08511e-64	160.416	NS
CGI_10011478	-3.02969	-1.43134	NS	-2.23051	Tripartite motif-containing 3	0.889	protein modification by small protein conjugation or removal	-2.78341	8.13254e-18	17.7206	-3.63894	1.80122e-25	39.2127	-2.66673	2.18645e-13	18.1066	-3.02969	-1.13629	0.000128679	22.143	-2.07808	2.98608e-11	43.2941	-1.07963	0.0015105	22.6249	-1.43134	0.942094	1.7806e-05	49.8027	NS	NS	NS	0.929011	0.000476426	50.8533	NS
CGI_10006649	-3.58903	-1.59464	NS	-2.59184	tripartite motif-containing 55-like [Crassostrea gigas]	0.7735	protein modification by small protein conjugation or removal	-3.79121	2.04606e-98	105.3	-3.91466	1.43569e-75	124.123	-3.06122	4.75581e-59	65.8363	-3.58903	-1.79224	2.0638e-36	123.137	-1.94666	9.80695e-28	142.397	-1.04502	1.43491e-11	85.1762	-1.59464	-1.16723	2.50839e-07	144.164	-1.3379	2.79619e-08	164.981	NS	NS	NS	NS
CGI_10011740	-3.9222	-1.47955	NS	-2.70087	Tripartite motif-containing 2	0.801	protein modification by small protein conjugation or removal	-4.03945	1.33127e-28	20.4396	-4.34454	1.047e-32	25.7494	-3.3826	3.71394e-18	11.7353	-3.9222	-1.65176	1.38906e-10	25.0648	-1.91908	7.56273e-15	30.4659	-0.867821	0.00267917	16.7026	-1.47955	-1.02431	0.000395406	29.7828	-1.2971	1.64431e-06	35.5984	NS	NS	NS	NS
CGI_10015735	-3.91022	-3.23574	NS	-3.57298	Tripartite motif-containing 2	0.7015	protein modification by small protein conjugation or removal	-3.80423	1.74194e-34	31.3167	-3.1796	1.66649e-22	19.8395	-4.74684	1.27871e-59	61.0813	-3.91022	-3.13362	1.20158e-22	31.2332	-2.46695	2.76809e-13	20.11	-4.10664	6.15531e-50	60.2094	-3.23574	-0.752905	0.00130992	48.4161	NS	NS	NS	-1.6883	7.83613e-19	79.2355	NS
CGI_10017579	2.73883	NS	2.90059	2.81971	Tripartite motif-containing 2	0.816	protein modification by small protein conjugation or removal	2.02103	2.84633e-06	90.7642	1.4028	1.69566e-06	111.64	4.79267	3.49369e-43	82.9618	2.73883	-1.9625	9.49066e-06	11.3759	-3.579	8.45392e-26	28.632	NS	NS	NS	NS	2.25062	2.19584e-10	87.5222	1.37407	9.75638e-11	108.642	5.07708	1.97826e-70	79.448	2.90059
CGI_10002033	3.49781	NS	1.4664	2.48211	Tripartite motif-containing 2	0.7845	protein modification by small protein conjugation or removal	3.19159	9.18691e-26	25.5639	3.32619	1.02519e-27	26.467	3.97566	8.4209e-31	24.9792	3.49781	NS	NS	NS	NS	NS	NS	NS	NS	NS	NS	1.16012	0.00371025	7.04994	1.26486	0.00140059	7.19692	1.97422	2.24972e-06	6.06575	1.4664
CGI_10002116	2.44222	NS	1.55248	1.99735	Tripartite motif-containing 2	0.6643	protein modification by small protein conjugation or removal	3.12394	7.46517e-15	11.2488	2.1782	1.60584e-09	13.0379	2.02451	3.8027e-07	12.8882	2.44222	1.98797	5.0648e-06	4.57969	0.990142	0.0203836	6.06159	NS	NS	NS	NS	2.25446	1.01804e-07	5.82781	1.25813	0.00159961	7.42036	1.14486	0.00982225	7.38888	1.55248
CGI_10027539	1.20475	NS	1.23664	1.22069	Tripartite motif-containing 2	0.794	protein modification by small protein conjugation or removal	0.484863	0.0182602	91.8855	0.905212	1.88682e-06	85.257	2.22417	8.477e-32	66.0116	1.20475	NS	NS	NS	NS	NS	NS	1.61791	5.22023e-18	45.3244	NS	0.522738	0.0140775	95.7949	0.937029	2.35702e-06	89.0132	2.25015	8.9767e-30	69.3236	1.23664
CGI_10012226	1.10125	NS	1.2464	1.17383	Tripartite motif-containing 2 [Crassostrea gigas]	0.7995	protein modification by small protein conjugation or removal	0.396388	0.00258598	103.95	2.10312	6.40318e-37	75.2374	0.804254	5.56528e-09	94.6968	1.10125	NS	NS	NS	1.72193	2.5372e-22	59.6831	0.438367	0.00562463	78.9585	NS	0.544671	1.05532e-05	112.97	2.24134	4.73948e-44	83.7195	0.953177	4.26093e-13	103.612	1.2464
CGI_10004464	1.10313	NS	0.922551	1.01284	Tripartite motif-containing 2	0.857	protein modification by small protein conjugation or removal	1.49658	1.60659e-12	45.2663	1.20754	4.53158e-10	50.2666	0.605256	0.00106669	57.2766	1.10313	0.728809	0.00929977	30.1626	NS	NS	NS	NS	NS	NS	NS	1.31614	1.86452e-09	42.3658	1.02302	3.64255e-07	47.2956	0.428492	0.0296631	54.5991	0.922551
CGI_10000120	0.961215	NS	1.06036	1.01079	Tripartite motif-containing 3	0.882	protein modification by small protein conjugation or removal	0.808323	9.53544e-12	121.003	0.946646	3.38854e-15	121.69	1.12868	2.71027e-19	114.542	0.961215	NS	NS	NS	NS	NS	NS	0.382911	0.0115478	80.0961	NS	0.908615	2.5841e-14	129.702	1.04279	8.44788e-18	130.588	1.22969	1.94477e-22	123.233	1.06036
CGI_10019958	0.944169	NS	0.99308	0.968625	Tripartite motif-containing 3	0.7425	protein modification by small protein conjugation or removal	0.704866	0.0377826	10.7453	0.858869	0.0170901	10.6473	1.26877	0.000215638	9.52196	0.944169	NS	NS	NS	NS	NS	NS	NS	NS	NS	NS	0.756148	0.0206174	11.3326	0.903433	0.00937997	11.2376	1.31966	7.31168e-05	10.085	0.99308
CGI_10012796	0.89195	NS	0.890041	0.890995	Tripartite motif-containing 2	0.7725	protein modification by small protein conjugation or removal	1.08848	1.15081e-16	1334	0.901084	3.00888e-10	1450.08	0.686289	1.00931e-11	1506.1	0.89195	0.589963	3.05551e-05	1035.23	0.400597	0.0124056	1137.58	NS	NS	NS	NS	1.08812	4.79411e-22	1363.77	0.895586	1.30162e-12	1481.85	0.686418	1.72412e-23	1540.11	0.890041
CGI_10018899	0.971975	NS	0.784568	0.878271	Tripartite motif-containing 3	0.873	protein modification by small protein conjugation or removal	1.21727	1.54795e-21	324.38	1.29113	3.10523e-38	333.226	0.407525	0.000114735	407.577	0.971975	0.925978	2.00235e-11	274.862	0.99505	9.52887e-20	281.737	NS	NS	NS	NS	1.03104	7.03639e-18	303.155	1.1014	3.62115e-36	310.836	0.221266	0.0239601	387.815	0.784568
CGI_10026779	0.800158	NS	0.851987	0.826072	Tripartite motif-containing 2	0.796	protein modification by small protein conjugation or removal	1.06523	1.24579e-21	190.88	0.461379	3.51151e-05	232.683	0.873867	5.76566e-15	203.937	0.800158	NS	NS	NS	-0.374072	0.0151934	168.433	NS	NS	NS	NS	1.11782	1.73532e-28	200.637	0.509899	4.16656e-07	243.63	0.928246	9.30971e-20	214.18	0.851987
CGI_10015961	0.30036	NS	0.544069	0.422215	Tripartite motif-containing 2	0.8585	protein modification by small protein conjugation or removal	0.320372	0.000720239	238.333	0.240842	0.0114389	254.446	0.339867	0.000143101	241.91	0.30036	NS	NS	NS	NS	NS	NS	NS	NS	NS	NS	0.564297	1.05487e-11	269.207	0.481591	3.94977e-09	286.651	0.586319	9.72788e-14	273.415	0.544069
CGI_10014104	-0.400363	NS	-0.364328	-0.382345	Tripartite motif-containing 45	0.5085	protein modification by small protein conjugation or removal	-0.538657	0.00160166	139.107	-0.35247	0.00458786	133.772	-0.309963	0.0223733	129.045	-0.400363	NS	NS	NS	NS	NS	NS	NS	NS	NS	NS	-0.501807	0.00131402	144.295	-0.319741	0.00278089	138.884	-0.271434	0.0191573	133.995	-0.364328
CGI_10000460	-0.484235	NS	-0.427998	-0.456117	Tripartite motif-containing 3	0.829	protein modification by small protein conjugation or removal	-0.776478	3.04133e-24	405.758	-0.304631	0.000618847	346.96	-0.371596	0.000206348	349.283	-0.484235	-0.64543	7.51016e-09	408.322	NS	NS	NS	NS	NS	NS	NS	-0.719291	1.47898e-15	422.016	-0.251568	0.0181004	362.04	-0.313136	0.00625009	364.27	-0.427998
CGI_10012968	-0.569208	NS	-0.839606	-0.704407	Tripartite motif-containing 3	0.894	protein modification by small protein conjugation or removal	-0.548865	0.00169646	97.2706	-0.394061	0.014084	94.7858	-0.764698	1.75209e-10	108.672	-0.569208	-0.407915	0.0281124	98.6803	NS	NS	NS	-0.617857	8.0132e-07	109.911	NS	-0.813569	4.71708e-05	92.542	-0.668733	0.000338721	89.7181	-1.03652	1.03486e-11	104.053	-0.839606
CGI_10005948	-0.857417	NS	-0.620836	-0.739126	Tripartite motif-containing 56 [Crassostrea gigas]	0.519	protein modification by small protein conjugation or removal	-0.6523	2.53593e-08	250.02	-0.635292	1.56775e-11	257.811	-1.28466	2.20215e-75	340.978	-0.857417	NS	NS	NS	NS	NS	NS	-0.74351	4.83807e-27	376.034	NS	-0.416485	0.000564449	274.172	-0.401305	3.12904e-05	282.907	-1.04472	1.32024e-52	367.668	-0.620836
CGI_10005979	-0.740584	NS	-1.42162	-1.0811	ariadne-1 [Crassostrea gigas]	0.6636	protein modification by small protein conjugation or removal	-0.559983	0.00109747	593.322	-0.627515	2.22292e-09	632.179	-1.03425	9.20005e-15	747.66	-0.740584	0.69071	3.89685e-06	911.586	0.645965	1.88888e-17	962.962	NS	NS	NS	NS	-1.23091	8.10697e-16	515.255	-1.31952	7.3236e-58	551.491	-1.71444	2.9796e-46	671.254	-1.42162
CGI_10013818	-1.3719	NS	-0.796378	-1.08414	Tripartite motif-containing 3	0.8675	protein modification by small protein conjugation or removal	-1.4502	9.10184e-21	80.2266	-1.56938	5.20384e-18	89.7694	-1.09612	3.58693e-14	68.0909	-1.3719	NS	NS	NS	NS	NS	NS	NS	NS	NS	NS	-0.873836	3.92556e-09	93.0962	-1.00299	1.03638e-08	103.357	-0.512311	0.000275945	80.8724	-0.796378
CGI_10022231	-1.36191	NS	-1.13937	-1.25064	Tripartite motif-containing 3	0.8625	protein modification by small protein conjugation or removal	-1.57894	2.09725e-66	267.404	-1.33459	5.37661e-56	245.233	-1.1722	2.5028e-25	222.874	-1.36191	-0.522087	0.00119584	330.424	NS	NS	NS	NS	NS	NS	NS	-1.35422	6.66276e-37	285.361	-1.11499	1.61208e-28	263.214	-0.948887	6.93556e-14	239.9	-1.13937
CGI_10016740	-1.57915	NS	-1.00182	-1.29048	Tripartite motif-containing 2 [Crassostrea gigas]	0.495	protein modification by small protein conjugation or removal	-1.73653	1.64283e-23	52.8194	-2.01107	3.43161e-23	65.3674	-0.989852	8.61913e-07	36.6041	-1.57915	0.361153	0.0295921	91.8888	NS	NS	NS	1.1038	1.14502e-11	76.9891	NS	-1.15692	1.04497e-12	60.5015	-1.43984	6.32963e-14	73.6602	-0.4087	0.0428924	44.0073	-1.00182
CGI_10028608	-1.63627	NS	-1.0748	-1.35554	Tripartite motif-containing 2	0.8355	protein modification by small protein conjugation or removal	-1.08773	2.87461e-14	87.6423	-2.25309	8.89196e-35	175.885	-1.568	1.40238e-31	114.039	-1.63627	NS	NS	NS	-1.45226	3.59834e-16	193.236	-0.746158	2.22883e-08	132.513	NS	-0.520288	4.6219e-05	103.899	-1.70553	2.59456e-24	195.01	-0.998584	5.8776e-18	131.21	-1.0748
CGI_10000817	NS	1.34346	1.13085	1.23716	Tripartite motif-containing 3	0.8585	protein modification by small protein conjugation or removal	NS	NS	NS	2.26181	1.04488e-19	49.3683	NS	NS	NS	NS	0.689691	4.78491e-06	85.5099	2.69651	3.01646e-37	62.5757	0.644197	1.29912e-06	88.5601	1.34346	0.470524	0.0021859	81.9749	2.49903	5.5548e-32	57.4864	0.423003	0.0018368	84.963	1.13085
CGI_10016739	NS	1.29592	0.878577	1.08725	Tripartite motif-containing 2 [Crassostrea gigas]	0.491	protein modification by small protein conjugation or removal	-1.77427	3.60832e-16	44.9361	-1.67509	2.94845e-12	44.4656	NS	NS	NS	NS	0.84568	9.42028e-05	98.8676	0.921653	5.58943e-05	100.63	2.12043	4.43174e-24	79.443	1.29592	0.408637	0.0090149	85.035	0.490097	0.00722611	86.1175	1.737	2.77209e-30	64.1406	0.878577
CGI_10012905	NS	1.04999	0.787505	0.918747	Tripartite motif-containing 3	0.7875	protein modification by small protein conjugation or removal	NS	NS	NS	NS	NS	NS	-0.578095	0.00460232	34.6721	NS	0.919255	1.84388e-07	47.4278	1.60603	5.10414e-17	42.6429	0.624675	0.000145833	52.3038	1.04999	0.655805	0.00047556	44.2805	1.34675	1.77764e-11	38.9996	0.359957	0.0443777	49.2537	0.787505
CGI_10000839	NS	0.711508	0.66557	0.688539	Tripartite motif-containing 45 [Crassostrea gigas]	0.835	protein modification by small protein conjugation or removal	NS	NS	NS	NS	NS	NS	-0.479879	0.00038811	508.544	NS	1.06102	5.54462e-20	532.193	0.723634	3.25881e-09	600.95	0.349866	0.000417167	658.279	0.711508	1.01571	4.0692e-18	548.212	0.677945	4.06274e-08	619.891	0.30305	0.00254807	680.201	0.66557
CGI_10013175	NS	0.451569	0.764457	0.608013	Tripartite motif-containing 2	0.8185	protein modification by small protein conjugation or removal	NS	NS	NS	0.238004	0.00888791	1271.03	0.208321	0.0118558	1258.44	NS	0.313161	0.0447532	1437.3	0.532426	0.000512012	1397.78	0.509119	0.00068144	1383.71	0.451569	0.628331	0.00196425	1735.52	0.843741	2.20501e-05	1701.59	0.821298	3.09764e-05	1682.02	0.764457
CGI_10006463	NS	0.402423	0.385335	0.393879	Tripartite motif-containing 2 [Crassostrea gigas]	0.8895	protein modification by small protein conjugation or removal	0.562678	0.000344102	77.1232	NS	NS	NS	NS	NS	NS	NS	0.618594	1.48761e-05	76.7898	0.289947	0.0446964	88.1713	0.298727	0.0437174	86.2649	0.402423	0.60342	3.19967e-06	80.3763	0.272012	0.0353917	92.3048	0.280573	0.0346747	90.2826	0.385335
CGI_10006732	NS	-0.391392	-0.404374	-0.397883	Tripartite motif-containing 2	0.652	protein modification by small protein conjugation or removal	NS	NS	NS	-0.335779	0.0335829	71.5999	-0.362942	0.0165627	70.9006	NS	-0.348563	0.0451799	64.0673	-0.402134	0.0255743	68.1389	-0.423479	0.0129405	67.5024	-0.391392	-0.360542	0.0179353	67.4248	-0.415029	0.00871641	71.6888	-0.437551	0.00355496	70.9888	-0.404374
CGI_10020991	NS	-0.474967	-0.482328	-0.478648	Tripartite motif-containing 2	0.9065	protein modification by small protein conjugation or removal	NS	NS	NS	NS	NS	NS	-0.323786	4.06038e-05	328.163	NS	-0.403988	0.00244609	251.273	-0.338528	0.000345337	254.214	-0.682386	2.6904e-17	287.72	-0.474967	-0.410723	0.00521557	263.89	-0.346605	0.00176354	266.854	-0.689655	6.94835e-13	302.041	-0.482328
CGI_10018145	NS	-0.5789	-0.752004	-0.665452	Tripartite motif-containing 45	0.6185	protein modification by small protein conjugation or removal	0.601562	3.65868e-06	163.297	0.876346	1.28893e-14	158.207	0.473246	7.60126e-05	173.075	0.650385	-0.624253	8.93314e-06	103.101	-0.358444	0.00891918	95.9059	-0.754003	1.43703e-09	111.517	-0.5789	-0.794983	6.00925e-08	103.685	-0.5326	0.000111297	95.8914	-0.928427	1.05469e-12	112.364	-0.752004
CGI_10007678	NS	-0.80391	-0.639903	-0.721906	Tripartite motif-containing 2	0.7355	protein modification by small protein conjugation or removal	NS	NS	NS	-0.804952	9.59821e-08	124.748	-0.383632	0.00681109	101.869	NS	-0.571999	0.00140042	83.1081	-1.1291	1.12658e-11	112.272	-0.710631	4.63661e-06	90.1373	-0.80391	-0.406735	0.0237418	91.848	-0.967621	3.95215e-09	122.719	-0.545353	0.0003971	99.2982	-0.639903
CGI_10007800	NS	-0.813977	-0.658818	-0.736398	Tripartite motif-containing 2	0.632	protein modification by small protein conjugation or removal	-0.726449	8.63263e-14	219.56	NS	NS	NS	NS	NS	NS	NS	-1.18232	7.51626e-30	191.485	-0.594118	0.000139631	152.471	-0.665498	0.000229709	155.175	-0.813977	-1.02316	7.04241e-25	208.79	-0.439498	0.00460888	167.958	-0.513801	0.00452441	170.615	-0.658818
CGI_10013823	NS	-0.505242	-1.12192	-0.81358	Tripartite motif-containing 3	0.8645	protein modification by small protein conjugation or removal	NS	NS	NS	NS	NS	NS	NS	NS	NS	NS	-0.478982	0.00289288	68.1659	-0.374315	0.0290825	67.9291	-0.66243	0.000167341	75.5705	-0.505242	-1.09546	1.08332e-10	60.9221	-0.993375	1.35066e-08	60.2285	-1.27692	1.27189e-11	68.432	-1.12192
CGI_10009894	NS	-0.956387	-0.676934	-0.81666	Tripartite motif-containing 3	0.74	protein modification by small protein conjugation or removal	NS	NS	NS	NS	NS	NS	NS	NS	NS	NS	-0.946354	2.42315e-13	139.237	-0.919849	1.37358e-12	143.1	-1.00296	1.142e-10	147.169	-0.956387	-0.664755	1.79261e-08	157.776	-0.639419	7.503e-08	162.245	-0.726627	6.33682e-07	166.246	-0.676934
CGI_10023890	NS	-1.0371	-0.790078	-0.913591	Tripartite motif-containing 45	0.6025	protein modification by small protein conjugation or removal	NS	NS	NS	NS	NS	NS	-0.845414	1.5739e-07	241.892	NS	-0.832586	3.34474e-11	139.956	-0.731583	9.1161e-11	138.974	-1.54714	1.11562e-50	203.127	-1.0371	-0.583728	7.69132e-08	157.954	-0.483669	7.22361e-07	157.306	-1.30284	1.4105e-50	224.571	-0.790078
CGI_10017063	NS	-0.772346	-1.21465	-0.9935	Tripartite motif-containing 3	0.5395	protein modification by small protein conjugation or removal	NS	NS	NS	-0.351884	0.032423	60.8825	NS	NS	NS	NS	-0.768839	0.000683806	45.4835	-0.919432	4.24685e-07	50.5087	-0.628768	0.00238753	43.4755	-0.772346	-1.20462	1.30988e-08	43.1355	-1.366	2.92953e-15	48.2253	-1.07334	1.89309e-08	40.8907	-1.21465
CGI_10009893	NS	-1.21497	-1.01105	-1.11301	Tripartite motif-containing 2	0.8095	protein modification by small protein conjugation or removal	-0.590197	7.82739e-05	228.418	NS	NS	NS	NS	NS	NS	NS	-1.53283	7.25843e-16	178.098	-1.05082	1.49814e-08	143.488	-1.06127	1.33677e-07	142.606	-1.21497	-1.33743	3.69929e-26	196.057	-0.841778	3.02576e-14	159.936	-0.85395	5.50755e-10	158.771	-1.01105
CGI_10009897	NS	-1.27992	-1.18307	-1.2315	Tripartite motif-containing 2	0.821	protein modification by small protein conjugation or removal	NS	NS	NS	0.295275	0.0110218	268.076	NS	NS	NS	NS	-1.46861	1.32435e-22	215.033	-0.985595	1.97014e-11	175.014	-1.38557	2.58588e-20	210.608	-1.27992	-1.37319	1.63155e-31	231.228	-0.885023	1.50769e-15	189.273	-1.291	7.16599e-28	226.544	-1.18307
CGI_10009896	NS	-1.55028	-0.93129	-1.24078	Tripartite motif-containing 2	0.809	protein modification by small protein conjugation or removal	-0.302812	0.0176983	181.543	NS	NS	NS	-0.704706	1.64665e-14	218.606	NS	-1.46086	5.14144e-21	132.067	-1.32201	5.55707e-20	127.331	-1.86797	5.17429e-47	167.256	-1.55028	-0.845565	7.78696e-13	159.46	-0.700212	4.8625e-11	155.259	-1.24809	6.73364e-42	196.846	-0.93129
CGI_10015446	NS	-2.063	-1.8954	-1.9792	Tripartite motif-containing 3	0.622	protein modification by small protein conjugation or removal	-0.775845	0.00394016	22.5457	-0.748288	0.00993014	23.2229	NS	NS	NS	NS	-2.29982	5.11966e-12	16.1398	-2.23021	1.11114e-10	16.5774	-1.65896	6.78087e-06	11.0822	-2.063	-2.11746	3.25934e-11	17.4528	-2.07259	8.0991e-10	17.9304	-1.49614	3.62017e-05	12.1312	-1.8954
CGI_10005687	0.93597	0.734193	0.626644	0.765602	proline-rich transmembrane 1-like	0.7625	response to external stimulus	1.16438	5.83615e-15	268.269	1.04825	7.83271e-13	286.826	0.595281	0.000472495	315.18	0.93597	0.966308	2.95473e-21	236.07	0.844393	8.72819e-18	253.023	0.39188	0.00309171	281.383	0.734193	0.859421	1.04222e-18	236.249	0.736957	7.44573e-15	253.551	0.283554	0.0341366	283.552	0.626644
CGI_10012062	0.370826	0.38169	0.661821	0.471446	ATP-dependent RNA helicase DDX56	0.747	response to external stimulus	0.364336	0.000945054	317.527	0.243988	0.0108075	343.288	0.504155	6.74195e-08	311.253	0.370826	0.375197	0.00112169	310.416	0.252704	0.0129646	335.569	0.517169	1.13979e-07	304.561	0.38169	0.655007	3.34837e-10	366.966	0.532671	1.36647e-09	394.893	0.797784	4.72423e-19	361.381	0.661821
CGI_10019419	-0.553642	-0.635292	-0.464569	-0.551168	poly [ADP-ribose] polymerase 9 isoform X1 [Macaca nemestrina]	0.7285	response to external stimulus	-0.509981	1.79562e-05	430.4	-0.554517	7.51865e-08	456.105	-0.596427	8.19546e-07	455.726	-0.553642	-0.591638	5.13109e-05	408.633	-0.639041	1.3642e-06	433.379	-0.675198	3.1208e-06	433.195	-0.635292	-0.420369	0.00441363	452.462	-0.468228	0.000407149	479.301	-0.505109	0.000542469	478.565	-0.464569
CGI_10014610	2.45595	2.61143	NS	2.53369	poly [ADP-ribose] polymerase 14-like	0.6465	response to external stimulus	3.45351	5.29545e-48	63.7814	0.844447	1.73147e-05	95.616	3.06989	1.27918e-42	66.8577	2.45595	3.6035	1.5936e-53	70.2248	1.01548	1.20039e-07	101.527	3.21532	2.71484e-48	73.4859	2.61143	1.97983	5.1101e-14	25.1131	-0.646051	0.00300703	56.1223	1.58611	3.89745e-10	27.4682	0.973295
CGI_10005565	1.5749	1.42664	NS	1.50077	poly [ADP-ribose] polymerase 14-like	0.715	response to external stimulus	1.33205	1.82847e-06	46.8721	2.62073	1.20862e-28	41.0158	0.771922	0.000148477	55.2781	1.5749	1.19843	6.32118e-05	43.0215	2.42919	5.95329e-21	37.1858	0.652287	0.00564246	51.1767	1.42664	NS	NS	NS	0.950288	0.00242236	16.2563	-0.866264	0.00049842	31.3687	NS
CGI_10021629	1.60733	1.0755	NS	1.34142	poly [ADP-ribose] polymerase 14-like	0.808	response to external stimulus	2.51366	2.6593e-23	41.9901	1.09774	9.01924e-09	55.287	1.21059	1.19672e-08	52.7731	1.60733	1.98825	1.15706e-14	29.5446	0.557749	0.00755221	42.0256	0.680506	0.00260767	39.8351	1.0755	NS	NS	NS	-2.08283	6.69868e-12	20.9719	-1.91537	6.3296e-09	19.0619	NS
CGI_10005916	1.07964	1.28078	NS	1.18021	mesenchyme-specific cell surface glyco -like	0.6735	response to external stimulus	1.11539	2.0524e-16	433.354	0.827754	1.83162e-07	482.155	1.29576	2.13579e-26	426.334	1.07964	1.31545	4.37847e-05	512.738	1.05528	0.00178451	563.776	1.47161	2.54478e-06	508.388	1.28078	NS	NS	NS	NS	NS	NS	NS	NS	NS	NS
CGI_10001069	0.481505	0.918896	NS	0.7002	Poly [ADP-ribose] polymerase 14	0.813	response to external stimulus	0.517825	0.0104973	151.071	0.460653	0.00690424	160.361	0.466037	0.00745165	156.959	0.481505	0.952556	2.40585e-07	179.441	0.897203	7.0658e-09	189.759	0.906928	7.92268e-09	185.96	0.918896	-1.5112	3.01452e-13	83.8301	-1.60648	8.74035e-20	90.4976	-1.59418	5.57842e-19	88.345	-1.57062
CGI_10016058	0.495566	0.729798	NS	0.612682	poly [ADP-ribose] polymerase 14-like	0.6625	response to external stimulus	0.380414	0.0229469	93.0229	0.602359	0.000846247	90.5933	0.503924	0.0051082	91.4765	0.495566	0.617337	3.89899e-05	99.902	0.832111	6.94942e-07	97.9055	0.739946	5.93027e-06	98.6423	0.729798	NS	NS	NS	NS	NS	NS	NS	NS	NS	NS
CGI_10020391	0.734361	0.463076	NS	0.598719	probable ATP-dependent RNA helicase DDX47	0.934	response to external stimulus	0.775	1.86949e-11	765.633	0.605108	1.83692e-05	832.704	0.822976	1.40724e-11	771.455	0.734361	0.503887	1.02446e-07	662.454	0.331014	0.0140261	724.621	0.554328	1.20495e-07	667.097	0.463076	NS	NS	NS	NS	NS	NS	NS	NS	NS	NS
CGI_10006624	0.439034	0.37536	NS	0.407197	Proline-rich transmembrane 1	0.7005	response to external stimulus	0.356558	0.0020233	239.88	0.330337	0.00110081	251.56	0.630207	1.18744e-12	226.068	0.439034	0.293717	0.0268762	228.111	0.264551	0.0268923	239.282	0.567813	1.69146e-08	214.701	0.37536	-0.823143	4.64469e-11	167.776	-0.857358	1.02684e-14	176.62	-0.556047	1.47296e-07	151.995	-0.745516
CGI_10024661	0.221987	0.22258	NS	0.222283	charged multivesicular body 1a	0.841	response to external stimulus	0.236628	0.000311562	510.988	0.183512	0.0153672	540.663	0.245822	0.000626666	519.762	0.221987	0.237284	0.00150978	497.422	0.181561	0.0343619	526.384	0.248893	0.00199413	506.34	0.22258	0.222442	0.0223226	521.135	NS	NS	NS	0.233511	0.0185148	530.022	NS
CGI_10012483	-1.06289	-1.10058	NS	-1.08173	Poly [ADP-ribose] polymerase 14	0.6025	response to external stimulus	-1.18497	8.15527e-25	721.608	-0.952016	6.61808e-16	671.647	-1.05168	3.02367e-14	692.71	-1.06289	-1.22275	1.14029e-23	696.215	-0.992721	9.63047e-16	647.606	-1.08626	1.87177e-14	668.03	-1.10058	0.236801	0.0323344	1124.89	0.468279	5.91869e-06	1089	0.363981	0.00621084	1103.09	0.356353
CGI_10017666	-1.10776	-2.17543	NS	-1.64159	helicase with zinc finger domain 2-like	0.744	response to external stimulus	-1.13641	2.57884e-16	220.605	-0.39169	0.0252968	164.629	-1.79518	8.21447e-93	313.683	-1.10776	-2.19565	8.39187e-33	178.519	-1.46085	7.52407e-13	122.616	-2.86978	1.66869e-92	268.354	-2.17543	-0.351171	0.0188624	278.229	0.38616	0.0220418	222.914	-0.997251	2.07786e-32	374.584	-0.320754
CGI_10017667	-1.32825	-2.91289	NS	-2.12057	helicase with zinc finger domain 2-like isoform X1 [Crassostrea gigas]	0.63	response to external stimulus	-1.16153	4.68023e-09	140.039	-0.895858	1.66824e-07	126.982	-1.92737	1.96457e-53	210.833	-1.32825	-2.71674	2.12252e-34	107.885	-2.48676	4.61214e-36	94.1033	-3.53516	2.49266e-111	176.197	-2.91289	NS	NS	NS	NS	NS	NS	-0.931917	2.40307e-20	261.492	NS
CGI_10017665	-1.50979	-3.39072	NS	-2.45025	helicase with zinc finger domain 2-like [Crassostrea gigas]	0.77	response to external stimulus	-1.0992	0.000242184	23.1984	-1.5419	8.07186e-10	30.1108	-1.88826	1.62411e-17	35.6267	-1.50979	-2.91202	5.45209e-15	16.8653	-3.43955	2.56261e-24	23.384	-3.82059	1.53016e-33	28.8395	-3.39072	NS	NS	NS	NS	NS	NS	-0.802264	0.000191317	45.4621	NS
CGI_10012948	1.29003	NS	2.38637	1.8382	Exonuclease 3 -5 domain-containing 1	0.602	response to external stimulus	0.905314	0.00318313	250.75	1.23388	0.000617724	238.145	1.73091	9.22376e-07	212.267	1.29003	NS	NS	NS	NS	NS	NS	1.02119	2.69659e-06	125.221	NS	1.94479	4.15658e-34	429.05	2.32032	9.97567e-31	422.766	2.894	5.44439e-48	393.25	2.38637
CGI_10012370	0.216772	NS	0.283673	0.250222	tyrosine- kinase HTK16	0.591	response to external stimulus	0.144292	0.00470137	1281.79	0.235074	0.000125489	1294.4	0.270949	1.41153e-06	1255.14	0.216772	NS	NS	NS	0.212455	0.00533415	1250.87	0.253411	0.000307683	1213.5	NS	0.211884	0.0176535	1347.72	0.299194	0.00113634	1361.65	0.339942	0.000111127	1321.08	0.283673
CGI_10009491	-0.88599	NS	-2.08546	-1.48572	Poly [ADP-ribose] polymerase 14	0.6565	response to external stimulus	-1.0172	0.0015667	10.2252	-0.868552	0.0125199	9.9063	-0.772219	0.0394649	9.24805	-0.88599	NS	NS	NS	NS	NS	NS	NS	NS	NS	NS	-2.23926	1.25464e-09	8.19726	-2.07724	1.05471e-07	7.78511	-1.93987	2.20913e-06	7.14775	-2.08546
CGI_10007366	NS	0.481726	0.271591	0.376659	scavenger receptor class B member 1-like [Crassostrea gigas]	0.673	response to external stimulus	NS	NS	NS	NS	NS	NS	NS	NS	NS	NS	0.476111	1.68617e-06	326.385	0.497148	2.95674e-09	337.105	0.47192	8.56937e-08	334.027	0.481726	0.266013	0.041236	316.273	0.287407	0.010893	326.329	0.261354	0.0250888	323.447	0.271591
CGI_10008499	NS	-0.470081	-0.304674	-0.387377	Mitogen-activated kinase kinase kinase 2	0.804	response to external stimulus	NS	NS	NS	-0.295143	0.000575558	308.626	NS	NS	NS	NS	-0.441551	8.30737e-06	247.318	-0.603752	5.59299e-13	274.822	-0.36494	2.48859e-05	244.678	-0.470081	-0.275908	0.00838413	273.83	-0.438596	3.55908e-07	303.252	-0.199517	0.0310131	271.191	-0.304674
CGI_10028074	NS	-0.908585	-1.27938	-1.09398	Beta-1,4-N-acetylgalactosaminyltransferase bre-4	0.74	response to external stimulus	-0.718356	0.000163309	71.5421	NS	NS	NS	-0.896614	1.59813e-06	79.2961	NS	-0.994517	1.59111e-09	65.0129	-0.563602	0.0005931	55.6132	-1.16764	1.13894e-12	72.4733	-0.908585	-1.35603	8.92755e-11	62.9364	-0.946519	2.92606e-06	52.8139	-1.5356	8.0918e-14	70.6423	-1.27938
CGI_10013386	0.948041	1.29991	NS	1.12398	NF-X1-type zinc finger NFXL1-like	0.8	response to external stimulus ; defense response ; response to stress	1.32325	1.39981e-05	11.7696	0.802728	0.00548259	13.9765	0.718148	0.0153175	13.9373	0.948041	1.66666	1.36572e-08	14.1121	1.15585	2.24553e-05	16.3666	1.07722	9.07587e-05	16.2911	1.29991	1.04228	0.00164285	10.4966	NS	NS	NS	NS	NS	NS	NS
CGI_10007490	NS	-0.44061	-0.33861	-0.38961	Myeloid differentiation primary response 88	0.518	response to external stimulus ; defense response ; response to stress	NS	NS	NS	NS	NS	NS	NS	NS	NS	NS	-0.43455	1.8228e-07	282.666	-0.391197	3.61383e-07	288.843	-0.496082	1.53986e-07	296.202	-0.44061	-0.331835	0.000136717	306.999	-0.28929	0.000364911	313.819	-0.394706	6.77084e-05	321.29	-0.33861
CGI_10028026	0.435658	0.500212	0.478904	0.471591	probable E3 ubiquitin- ligase DTX3	0.796	response to external stimulus ; protein modification by small protein conjugation or removal	0.329701	0.00118847	229.387	0.598009	1.2802e-07	220.384	0.379264	0.00181795	230.3	0.435658	0.395406	0.00244004	229.575	0.65825	1.64411e-06	221.077	0.446978	0.00188368	230.74	0.500212	0.373818	0.00033451	239.336	0.637865	3.6402e-08	230.201	0.425029	0.000510313	240.368	0.478904
CGI_10027067	-2.02106	-2.54842	-2.31918	-2.29622	E3 ubiquitin- ligase HERC2	0.7915	response to external stimulus ; protein modification by small protein conjugation or removal	-2.75154	1.71323e-25	26.462	-1.95141	2.44216e-09	17.1328	-1.36024	0.000376633	12.047	-2.02106	-3.32535	2.25951e-28	24.3795	-2.47446	3.77942e-12	15.2603	-1.84545	4.6492e-06	10.3194	-2.54842	-3.05048	1.17775e-29	26.4253	-2.25272	3.19754e-12	16.8491	-1.65436	8.90388e-06	11.6338	-2.31918
CGI_10018622	1.29798	1.00486	NS	1.15142	probable E3 ubiquitin- ligase MID2	0.5115	response to external stimulus ; protein modification by small protein conjugation or removal	1.50781	8.06894e-45	603.338	1.00989	6.49994e-16	695.441	1.37625	8.99673e-46	631.956	1.29798	1.21135	1.32912e-13	511.745	0.721018	5.32004e-05	598.258	1.08219	3.55909e-12	538.45	1.00486	-0.998843	1.02169e-16	237.534	-1.48882	2.86165e-29	316.586	-1.13937	2.29783e-27	258.938	-1.20901
CGI_10015457	0.929325	0.91951	NS	0.924418	E3 ubiquitin- ligase RING2-like	0.762	response to external stimulus ; protein modification by small protein conjugation or removal	0.597199	4.57834e-05	78.2151	0.459347	0.000980704	84.8738	1.73143	2.73855e-29	62.3367	0.929325	0.591821	0.000323603	76.0776	0.45178	0.00403796	82.5539	1.71493	3.6177e-25	60.6775	0.91951	0.36928	0.0207283	72.9607	NS	NS	NS	1.50278	2.0656e-21	56.5592	NS
CGI_10014452	-0.524704	-0.537797	NS	-0.53125	probable E3 ubiquitin- ligase XERICO	0.835	response to external stimulus ; protein modification by small protein conjugation or removal	-0.754339	4.35706e-08	194.834	-0.54784	8.28773e-09	184.983	-0.271932	0.0382453	162.262	-0.524704	-0.766453	2.01568e-08	189.093	-0.564345	2.66202e-09	179.542	-0.282593	0.0288115	157.455	-0.537797	NS	NS	NS	NS	NS	NS	0.442061	0.0170629	216.11	NS
CGI_10023603	-1.1698	-0.963592	NS	-1.0667	E3 ubiquitin- ligase HERC1	0.8611	response to external stimulus ; protein modification by small protein conjugation or removal	-1.53643	5.38544e-09	83.5494	-0.771555	0.00284	57.213	-1.20142	7.42397e-07	69.5507	-1.1698	-1.348	1.82109e-10	84.8595	-0.553353	0.00482087	59.3788	-0.989424	4.43536e-08	71.3079	-0.963592	NS	NS	NS	0.585191	0.00016955	94.3859	NS	NS	NS	NS
CGI_10012323	-0.886543	-1.27199	NS	-1.07926	E3 ubiquitin- ligase NEURL1B-like isoform X2 [Crassostrea gigas]	0.659	response to external stimulus ; protein modification by small protein conjugation or removal	-1.34584	8.28565e-44	368.898	-0.860553	1.2116e-10	304.976	-0.453236	5.52167e-07	250.329	-0.886543	-1.7294	2.77634e-48	334.449	-1.24498	6.73395e-17	271.381	-0.841575	1.46919e-13	218.619	-1.27199	-0.715187	1.05939e-14	437.355	NS	NS	NS	0.18108	0.0445968	317.047	NS
CGI_10011878	-1.97974	-2.37612	NS	-2.17793	E3 ubiquitin- ligase RING2-like	0.762	response to external stimulus ; protein modification by small protein conjugation or removal	-1.66875	5.37071e-07	25.0071	-1.62994	2.22288e-07	24.4974	-2.64054	5.40536e-23	44.3183	-1.97974	-2.08451	2.86395e-14	23.0801	-2.02086	4.82997e-15	22.5555	-3.02301	5.08589e-40	41.8492	-2.37612	NS	NS	NS	NS	NS	NS	-1.25268	6.2097e-14	56.2457	NS
CGI_10009138	3.02982	NS	3.44162	3.23572	E3 ubiquitin- ligase DZIP3	0.6925	response to external stimulus ; protein modification by small protein conjugation or removal	4.20148	3.40127e-43	39.6951	1.81237	4.43608e-15	50.4297	3.0756	4.01131e-37	43.1033	3.02982	2.68008	2.22689e-13	14.8404	NS	NS	NS	1.60459	6.92109e-07	17.6928	NS	4.58066	1.81894e-55	55.3156	2.24151	1.84477e-25	66.8429	3.50269	5.72797e-52	59.127	3.44162
CGI_10007616	NS	1.87192	1.76129	1.8166	E3 ubiquitin- ligase HERC1	0.8667	response to external stimulus ; protein modification by small protein conjugation or removal	2.14708	1.74272e-07	10.6805	1.68011	0.000406779	11.4446	NS	NS	NS	NS	2.59098	5.0276e-14	12.4487	2.06315	2.67294e-07	13.2687	0.961627	0.000614337	17.0299	1.87192	2.47034	4.36379e-12	12.2489	1.95216	4.31778e-06	13.0715	0.861376	0.00384761	17.0423	1.76129
CGI_10017571	NS	1.74001	1.64334	1.69168	E3 ubiquitin- ligase DZIP3	0.651	response to external stimulus ; protein modification by small protein conjugation or removal	1.13595	1.01549e-09	919.681	1.77133	9.06189e-23	850.408	NS	NS	NS	NS	1.84048	1.47012e-90	1267.9	2.48944	2.22997e-178	1214.78	0.890117	2.37066e-22	1560.84	1.74001	1.7429	5.29037e-49	1274.24	2.38749	6.58201e-95	1215.27	0.799633	2.62045e-11	1580.24	1.64334
CGI_10022298	NS	0.738882	1.00726	0.87307	E3 ubiquitin- ligase HERC2	0.642	response to external stimulus ; protein modification by small protein conjugation or removal	NS	NS	NS	0.609756	1.4421e-06	188.384	0.873706	2.75707e-14	172.391	NS	0.323862	0.0123692	221.696	0.811535	5.71554e-12	200.657	1.08125	3.2187e-24	184.91	0.738882	0.590258	2.63474e-08	259.949	1.08016	3.47009e-26	238.75	1.35135	1.06799e-48	221.642	1.00726
CGI_10008890	NS	0.507766	0.637415	0.572591	E3 ubiquitin- ligase TRIM71-like isoform X2 [Crassostrea gigas]	0.829	response to external stimulus ; protein modification by small protein conjugation or removal	NS	NS	NS	NS	NS	NS	NS	NS	NS	NS	0.443298	1.98584e-06	269.452	0.649304	1.39598e-07	263.924	0.430697	6.44453e-05	276.586	0.507766	0.573696	8.77943e-13	298.858	0.77809	7.56505e-12	293.547	0.56046	4.49971e-09	306.507	0.637415
CGI_10023357	NS	-0.58443	-0.887381	-0.735906	E3 ubiquitin- ligase ARI3 [Crassostrea gigas]	0.5545	response to external stimulus ; protein modification by small protein conjugation or removal	NS	NS	NS	NS	NS	NS	NS	NS	NS	NS	-0.661528	2.62629e-06	686.311	-0.66902	2.74553e-06	716.266	-0.422742	0.0133902	635.087	-0.58443	-0.965222	3.39739e-20	670.336	-0.973696	4.00594e-19	699.713	-0.723224	8.13792e-08	614.888	-0.887381
CGI_10011951	0.580672	0.441418	NS	0.511045	NEDD8-activating enzyme E1 catalytic subunit	0.836	response to external stimulus ; response to stress ; protein modification by small protein conjugation or removal	0.58227	1.00779e-09	366.377	0.598326	8.61561e-12	379.629	0.561421	1.19357e-09	376.228	0.580672	0.443146	4.81409e-05	336.536	0.456513	6.46969e-06	348.659	0.424594	5.5754e-05	345.964	0.441418	NS	NS	NS	NS	NS	NS	NS	NS	NS	NS
CGI_10015152	0.347831	0.31779	NS	0.33281	transitional endoplasmic reticulum ATPase	0.9605	response to external stimulus ; response to stress ; protein modification by small protein conjugation or removal	0.395191	4.24853e-06	2082.26	0.377909	4.94598e-06	2177.76	0.270392	0.00230591	2208.19	0.347831	0.365532	8.37856e-09	2002.32	0.345193	1.43044e-08	2094.72	0.242646	0.000184013	2125.84	0.31779	0.159698	0.035192	1949.73	NS	NS	NS	NS	NS	NS	NS
CGI_10006029	-2.56791	-2.14665	NS	-2.35728	histone acetyltransferase p300-like isoform X2	0.8915	response to externalstimulus ; defense to stress	-1.53737	0.00169765	1.82456	-3.18553	4.71824e-13	6.64522	-2.98083	2.96992e-11	5.85905	-2.56791	-1.20451	0.0138237	1.93404	-2.71591	3.48877e-11	6.6409	-2.51952	1.78954e-09	5.86311	-2.14665	2.39017	2.60411e-13	15.3174	0.967854	0.00019625	20.7928	1.10588	4.96491e-05	19.7298	1.48797
CGI_10027918	-0.436452	-0.355788	-0.444341	-0.412194	E3 ubiquitin- ligase RNF8-like	0.697	response to externalstimulus ; defense to stress ; protein modification by small protein conjugation or removal	-0.306586	0.000395385	250.921	-0.302876	0.00173473	260.6	-0.699894	2.87305e-19	300.704	-0.436452	-0.225895	0.00948932	250.554	-0.22512	0.0199557	260.283	-0.616349	1.81785e-16	299.262	-0.355788	-0.314262	0.00210713	256.292	-0.313962	0.00458831	266.164	-0.704798	7.75356e-15	307.225	-0.444341
CGI_10021871	-0.596703	-0.476522	NS	-0.536612	E3 ubiquitin- ligase parkin	0.627	response to externalstimulus ; defense to stress ; protein modification by small protein conjugation or removal	-0.575311	2.63075e-06	198.448	-0.397371	0.00136024	191.681	-0.817427	2.9893e-19	224.455	-0.596703	-0.455246	6.6058e-05	200.165	-0.279623	0.0180761	193.912	-0.694697	2.87488e-17	225.71	-0.476522	NS	NS	NS	NS	NS	NS	-0.448176	8.44182e-08	254.331	NS
CGI_10008500	-1.23694	-0.595408	-0.538418	-0.790254	F-box only 31-like	0.591	response to stress	-1.20341	2.84292e-25	114.063	-1.1781	5.00836e-23	117.279	-1.3293	9.34319e-28	124.14	-1.23694	-0.562185	1.67113e-05	130.001	-0.53909	5.54491e-05	133.95	-0.684951	2.63602e-07	140.255	-0.595408	-0.503642	0.000245179	138.997	-0.482399	0.000577442	143.211	-0.629214	5.45448e-06	149.742	-0.538418
CGI_10021544	-0.860752	-0.833835	-0.794475	-0.829687	glutathione S-transferase 3-like [Crassostrea gigas]	0.6725	response to stress	-0.7099	7.25453e-10	190.052	-1.14285	8.71706e-23	241.647	-0.729506	2.58676e-06	196.231	-0.860752	-0.684763	3.03729e-09	186.37	-1.11812	3.39404e-22	236.776	-0.698625	6.7829e-06	192.522	-0.833835	-0.641674	1.25787e-12	198.437	-1.07984	8.23051e-31	251.547	-0.661907	1.12677e-06	204.818	-0.794475
CGI_10026982	-4.74067	-1.96948	-1.83679	-2.84898	universal stress A	0.7155	response to stress	-4.8235	1.54762e-66	73.9408	-5.44833	1.61039e-92	114.195	-3.95017	1.50949e-37	40.306	-4.74067	-2.07514	2.20971e-30	86.1647	-2.66767	8.45643e-67	126.037	-1.16563	9.15561e-08	53.7256	-1.96948	-1.94068	1.78737e-31	92.4507	-2.53272	4.38221e-72	134.489	-1.03697	3.25414e-07	58.3041	-1.83679
CGI_10004430	3.46875	3.44476	NS	3.45676	heat shock 70 kDa 12A-like	0.7065	response to stress	2.66355	9.3082e-09	187.767	1.29833	0.00766268	197.2	6.44436	4.64699e-112	189.885	3.46875	2.57756	8.07201e-09	218.457	1.14546	0.0103067	228.86	6.61127	6.17472e-136	221.496	3.44476	NS	NS	NS	NS	NS	NS	NS	NS	NS	NS
CGI_10022878	1.62836	0.906379	NS	1.26737	UV excision repair RAD23 homolog B	0.903	response to stress	1.20856	4.43953e-13	57.055	1.98764	1.30086e-21	51.5912	1.68887	2.22176e-20	53.1718	1.62836	0.495075	0.0191108	39.9408	1.2559	1.8346e-07	33.9763	0.968163	6.23561e-06	35.8712	0.906379	NS	NS	NS	1.10689	9.27868e-06	33.0026	0.816444	0.000241237	35.0336	NS
CGI_10015147	1.10466	0.629312	NS	0.866984	ATP-dependent DNA helicase PIF1	0.747	response to stress	1.0294	7.76427e-05	85.1793	1.2365	1.98445e-08	85.099	1.04807	1.19429e-05	86.8802	1.10466	0.562076	0.00871338	65.4778	0.753122	9.99685e-07	64.6909	0.572739	0.00169422	66.8384	0.629312	NS	NS	NS	0.370408	0.0180602	57.7538	NS	NS	NS	NS
CGI_10020324	0.965324	0.723262	NS	0.844293	A G-specific adenine DNA glycosylase	0.6665	response to stress	0.627775	2.55351e-05	78.2839	1.32185	1.36636e-16	68.9262	0.946349	3.98442e-10	73.4306	0.965324	0.389855	0.030574	69.2487	1.07237	2.45043e-09	59.8516	0.707561	4.49564e-05	64.4364	0.723262	-0.630233	0.000323705	51.3782	NS	NS	NS	NS	NS	NS	NS
CGI_10000761	0.726074	0.748993	NS	0.737533	post-GPI attachment to s factor 2 isoform X4 [Coturnix japonica]	0.7145	response to stress	0.849881	4.29965e-10	193.436	0.672349	1.54261e-09	211.189	0.655993	6.75732e-06	207.882	0.726074	0.872062	9.09505e-08	191.235	0.693981	1.14619e-06	208.6	0.680935	5.98341e-05	205.485	0.748993	0.362077	0.0048151	160.728	NS	NS	NS	NS	NS	NS	NS
CGI_10002795	0.895075	0.353076	NS	0.624075	heat shock 70 kDa 12A-like	0.698	response to stress	0.940513	1.84793e-11	262.999	0.85965	7.65594e-15	279.844	0.885061	8.37686e-17	272.733	0.895075	0.402107	0.008286	202.29	0.313491	0.00830946	216.507	0.34363	0.00198297	210.797	0.353076	NS	NS	NS	-0.325333	0.00899613	182.337	-0.296164	0.0134126	177.057	NS
CGI_10011415	0.599031	0.63651	NS	0.61777	heat shock 70 kDa 12B-like [Crassostrea gigas]	0.687	response to stress	0.394334	0.00118534	480.509	1.08971	1.55939e-27	417.077	0.313048	0.00307855	503.056	0.599031	0.431416	1.13655e-05	474.513	1.12639	2.37826e-49	412.915	0.351726	3.24368e-06	496.872	0.63651	-0.379014	7.04514e-05	375	0.313718	4.28003e-05	305.104	-0.463095	8.98596e-12	395.604	-0.17613
CGI_10011266	0.50062	0.494956	NS	0.497788	glutathione S-transferase omega-like 2	0.6445	response to stress	0.222319	0.000662547	1046.65	0.540751	9.80638e-14	988.748	0.738791	5.21861e-25	918.796	0.50062	0.217991	0.0161077	1017.29	0.532364	4.80194e-09	960.924	0.734514	2.94165e-16	893.681	0.494956	-0.526626	2.11098e-17	837.439	-0.210908	0.0106921	768.613	NS	NS	NS	NS
CGI_10017612	0.477081	0.50898	NS	0.493031	selenium-dependent glutathione peroxidase	0.8325	response to stress	0.475009	0.00350682	160.419	0.573523	0.000232581	162.127	0.382711	0.00854389	168.28	0.477081	0.506929	0.00296549	158.39	0.601628	0.000254795	160.168	0.418383	0.00683833	166.249	0.50898	NS	NS	NS	0.388838	0.0143806	154.231	NS	NS	NS	NS
CGI_10008808	0.48242	0.464421	NS	0.47342	bcl-2 homologous antagonist killer-like [Biomphalaria glabrata]	0.765	response to stress	0.595488	0.000432853	461.787	0.384125	0.0100456	512.148	0.467645	0.000450858	490.165	0.48242	0.5785	0.000154497	445.92	0.362795	0.00491341	494.764	0.451968	3.17656e-05	473.718	0.464421	NS	NS	NS	-0.393025	0.00212737	399.442	-0.306872	0.00733987	379.277	NS
CGI_10008426	0.467603	0.46354	NS	0.465571	structural maintenance of chromosomes 5-like	0.78	response to stress	0.443704	0.0161201	49.7592	0.467169	0.00723845	51.4208	0.491936	0.00491538	50.0552	0.467603	0.440057	0.0313277	48.4404	0.460462	0.0178005	50.0712	0.4901	0.0105049	48.7729	0.46354	NS	NS	NS	NS	NS	NS	NS	NS	NS	NS
CGI_10021745	0.388371	0.456575	NS	0.422473	structural maintenance of chromosomes 5-like	0.614	response to stress	0.436052	5.56781e-06	401.841	0.459313	1.07058e-06	415.135	0.269749	0.0212024	431.241	0.388371	0.504278	5.72731e-07	402.315	0.524869	1.4604e-07	415.777	0.340577	0.0041772	431.497	0.456575	NS	NS	NS	NS	NS	NS	NS	NS	NS	NS
CGI_10024074	-0.243936	-0.181373	NS	-0.212655	helicase	0.6635	response to stress	-0.243384	0.002074	792.919	-0.233799	0.000160806	821.902	-0.254626	0.000150644	812.727	-0.243936	-0.180972	0.0224035	787.662	-0.173831	0.00410744	816.737	-0.189315	0.00325505	807.67	-0.181373	NS	NS	NS	NS	NS	NS	NS	NS	NS	NS
CGI_10017947	-0.362778	-0.364906	NS	-0.363842	heat shock 70 kDa 12A-like	0.635	response to stress	-0.501083	8.6722e-10	721.166	-0.244604	0.0126103	678.251	-0.342649	4.24781e-05	690.692	-0.362778	-0.5032	1.03581e-10	701.436	-0.249391	0.00818091	659.795	-0.342127	1.42189e-05	672.083	-0.364906	-0.298464	0.000991514	785.26	NS	NS	NS	NS	NS	NS	NS
CGI_10004824	-0.379852	-0.375263	NS	-0.377557	heat shock 70 kDa 12A-like [Crassostrea gigas]	0.6965	response to stress	-0.478037	1.73175e-05	248.284	-0.384065	0.000842243	248.838	-0.277453	0.017039	233.926	-0.379852	-0.472902	0.000282015	241.764	-0.382138	0.00449223	242.371	-0.270749	0.0486358	227.917	-0.375263	NS	NS	NS	0.224139	0.0433374	313.941	0.336734	0.000804113	297.576	NS
CGI_10026265	-0.661346	-0.340651	NS	-0.500998	glutathione S-transferase P 1-like	0.733	response to stress	-0.617824	8.51344e-26	1447.97	-0.563973	3.57035e-15	1473.45	-0.802242	1.14241e-37	1599.84	-0.661346	-0.297326	5.14043e-05	1548.33	-0.24633	0.00494063	1579.25	-0.478297	1.05142e-10	1699.86	-0.340651	NS	NS	NS	NS	NS	NS	-0.177005	0.0457377	1963.44	NS
CGI_10004348	-0.821212	-0.962912	NS	-0.892062	Heat shock 70 kDa 12B	0.762	response to stress	-0.874656	4.72745e-32	1593.34	-0.602335	8.83217e-08	1474.25	-0.986645	2.63615e-23	1715.2	-0.821212	-1.01672	1.21942e-17	1495.18	-0.748555	1.80119e-07	1377.63	-1.12346	1.74497e-17	1613.14	-0.962912	0.678516	3.03386e-33	2755.74	0.936782	9.01173e-22	2677.94	0.5607	2.7793e-10	2903.76	0.725333
CGI_10024296	-0.867648	-0.948132	NS	-0.90789	heat shock 70 kDa 12A-like	0.718	response to stress	-0.843814	4.5386e-19	589.513	-0.836735	9.11238e-16	612.019	-0.922394	1.12772e-21	623.547	-0.867648	-0.924673	2.48224e-23	562.756	-0.919151	1.30649e-19	584.449	-1.00057	9.14668e-27	595.785	-0.948132	0.295812	0.00294926	867.413	0.297855	0.00625659	900.922	0.219112	0.0347784	907.614	0.270926
CGI_10006334	-0.835835	-0.987079	NS	-0.911457	heat shock 70 kDa 12A-like	0.795	response to stress	-0.598589	7.8879e-08	1325.61	-0.841518	1.57587e-13	1534.88	-1.0674	5.38801e-17	1675.59	-0.835835	-0.750646	1.02451e-14	1238.56	-0.995701	9.09283e-23	1440.86	-1.21489	4.92712e-25	1578.66	-0.987079	NS	NS	NS	-0.319165	0.000177723	1825.16	-0.543056	2.42195e-07	1964.17	NS
CGI_10002218	-0.706963	-1.20309	NS	-0.955024	E3 SUMO- ligase NSE2 isoform X1 [Macaca mulatta]	0.6205	response to stress	-0.811186	0.000295185	65.7444	-0.601412	0.000236218	61.4291	-0.70829	0.000642457	63.5957	-0.706963	-1.30005	5.28535e-08	56.759	-1.11078	1.94874e-09	52.3084	-1.19843	8.69575e-08	54.5439	-1.20309	NS	NS	NS	NS	NS	NS	NS	NS	NS	NS
CGI_10009020	-1.18873	-1.01846	NS	-1.1036	heat shock 70 kDa 12A-like	0.557	response to stress	-1.56942	5.30502e-36	158.777	-0.897129	6.51696e-13	118.196	-1.09964	1.63191e-16	127.506	-1.18873	-1.39458	2.47225e-18	159.003	-0.73399	1.07001e-05	119.739	-0.926817	4.30582e-08	128.694	-1.01846	-0.803669	1.1369e-07	191.265	NS	NS	NS	-0.337074	0.0476357	159.756	NS
CGI_10014932	-1.37422	-1.2437	NS	-1.30896	Heat shock 70 kDa 12B	0.6215	response to stress	-1.13974	5.27125e-06	68.2832	-1.27573	3.17662e-08	75.6136	-1.70718	1.98065e-15	93.6093	-1.37422	-1.01144	3.58865e-06	68.7714	-1.14355	6.46474e-09	76.0434	-1.57611	2.18746e-18	93.4836	-1.2437	1.876	6.5384e-29	238.935	1.76711	3.2082e-30	253.158	1.34048	1.54387e-19	268.422	1.6612
CGI_10014933	-1.54648	-1.22887	NS	-1.38767	Heat shock 70 kDa 12B	0.627	response to stress	-1.4761	6.48023e-18	139.181	-0.97741	4.01921e-08	112.249	-2.18592	1.03782e-82	206.546	-1.54648	-1.16093	3.01379e-11	144.267	-0.664187	0.000385053	118.461	-1.86149	1.1005e-56	210.051	-1.22887	0.806908	1.55152e-08	294.155	1.31162	2.50613e-21	272.534	NS	NS	NS	NS
CGI_10009482	-1.33962	-1.80477	NS	-1.5722	Heat shock 70 kDa 12A	0.7145	response to stress	-1.31954	2.96322e-07	39.741	-0.995603	3.176e-06	34.1782	-1.70371	9.18873e-12	50.1906	-1.33962	-1.78251	3.9704e-11	35.3352	-1.48276	1.49993e-10	29.8045	-2.14905	1.79681e-16	45.4322	-1.80477	NS	NS	NS	0.675576	9.70331e-05	61.9544	NS	NS	NS	NS
CGI_10022751	-2.31532	-2.33344	NS	-2.32438	heat shock 70 kDa 12A-like [Crassostrea gigas]	0.583	response to stress	-2.43254	1.37006e-11	15.8889	-2.17743	2.3668e-09	13.1455	-2.33599	3.83868e-10	15.0681	-2.31532	-2.47373	1.20916e-12	15.3558	-2.18609	4.50006e-10	12.6941	-2.34049	4.58736e-11	14.559	-2.33344	NS	NS	NS	NS	NS	NS	NS	NS	NS	NS
CGI_10014749	2.03448	NS	1.55806	1.79627	heat shock 70 kDa 12A-like	0.828	response to stress	2.4389	3.88106e-23	61.9089	1.73639	1.61245e-18	71.3414	1.92813	7.53632e-23	67.9442	2.03448	0.667931	0.0371365	22.1621	NS	NS	NS	NS	NS	NS	NS	1.99293	2.43007e-21	46.473	1.24079	2.48729e-14	55.3987	1.44045	9.67073e-19	52.3013	1.55806
CGI_10019882	0.415487	NS	0.728035	0.571761	Tetraspanin-33	0.6795	response to stress	0.451248	0.00543552	59.0822	0.399017	0.00889225	62.5077	0.396195	0.0133837	61.4024	0.415487	NS	NS	NS	NS	NS	NS	NS	NS	NS	NS	0.763228	1.70002e-06	69.4144	0.709687	1.5069e-06	73.2467	0.71119	3.87268e-06	71.9778	0.728035
CGI_10013532	0.685531	NS	0.358709	0.52212	heat shock 70 kDa 12B-like [Crassostrea gigas]	0.6265	response to stress	0.786181	1.92281e-13	318.297	0.764963	3.29161e-14	333.288	0.505448	2.50054e-10	351.101	0.685531	0.454682	5.43116e-05	269.275	0.429664	4.8424e-05	282.224	NS	NS	NS	NS	0.461366	4.87692e-06	284.016	0.43604	3.57028e-06	297.579	0.178723	0.0176923	316.776	0.358709
CGI_10024283	0.382128	NS	0.453174	0.417651	endonuclease 8-like 1	0.7165	response to stress	0.208187	0.0198041	843.151	0.349468	2.02817e-06	839.462	0.58873	3.2393e-11	767.314	0.382128	-0.259298	0.00439899	698.353	NS	NS	NS	NS	NS	NS	NS	0.279657	0.000945127	888.328	0.417524	4.28156e-09	885.301	0.662341	2.78988e-14	811.225	0.453174
CGI_10026447	-0.139727	NS	-0.36248	-0.251104	Cyclic AMP-responsive element-binding 3 2	0.807	response to stress	-0.111128	0.0269296	5268.9	-0.116779	0.0134275	5494.26	-0.191274	0.00120759	5537.29	-0.139727	NS	NS	NS	NS	NS	NS	NS	NS	NS	NS	-0.333326	4.97388e-17	5028.26	-0.342447	1.389e-20	5244.38	-0.411669	9.67782e-16	5295.11	-0.36248
CGI_10014682	-0.34629	NS	-0.280948	-0.313619	universal stress A [Crassostrea gigas]	0.67	response to stress	-0.342231	1.42062e-05	1760.32	-0.414373	1.13534e-10	1883.89	-0.282266	0.00016393	1754.46	-0.34629	NS	NS	NS	-0.237646	0.00244149	1939	NS	NS	NS	NS	-0.276443	0.000186118	1841.23	-0.351772	5.92058e-10	1969.46	-0.214629	0.00206024	1835.9	-0.280948
CGI_10021543	-0.587334	NS	-0.687892	-0.637613	glutathione S-transferase 3-like [Crassostrea gigas]	0.641	response to stress	-0.514641	2.61128e-09	324.987	-0.72444	2.53656e-21	369.415	-0.522921	2.72674e-06	333.163	-0.587334	NS	NS	NS	NS	NS	NS	NS	NS	NS	NS	-0.614811	1.4358e-10	323.645	-0.827921	7.27864e-22	368.901	-0.620944	1.55791e-07	331.786	-0.687892
CGI_10002852	-1.04316	NS	-0.751914	-0.897536	innexin unc-9-like isoform X2 [Octopus bimaculoides]	0.5715	response to stress	-1.26472	1.69228e-28	249.896	-0.737419	1.77848e-13	202.475	-1.12734	3.56921e-37	237.127	-1.04316	-0.395287	0.0142355	302.666	NS	NS	NS	NS	NS	NS	NS	-0.974129	4.36499e-18	272.988	-0.448609	7.5811e-06	225.102	-0.833005	1.6612e-22	260.194	-0.751914
CGI_10009321	-0.777535	NS	-1.36528	-1.07141	ankyrin repeat domain-containing 32 [Canis lupus familiaris]	0.731	response to stress	-0.615605	0.0186866	21.5347	-1.0666	6.75118e-05	28.1236	-0.650402	0.0164242	22.289	-0.777535	2.02827	1.90131e-22	70.6942	1.54921	4.84264e-12	79.1147	1.98915	4.65038e-21	72.5196	1.85554	-1.20868	1.96726e-06	19.0034	-1.64611	6.44907e-10	25.6509	-1.24107	2.15199e-06	19.712	-1.36528
CGI_10001267	NS	4.1793	4.15325	4.16628	Heat shock 70 kDa 12A	0.647	response to stress	NS	NS	NS	5.27289	1.22144e-50	56.2487	5.57703	1.16881e-50	54.8788	NS	0.797777	0.000482094	135.04	5.74432	5.21786e-71	90.7403	5.99581	3.31338e-70	88.9175	4.1793	0.585753	0.00269845	128.113	5.78408	1.33217e-73	80.8561	6.08993	3.85387e-70	79.1301	4.15325
CGI_10001266	NS	2.9193	2.93733	2.92831	Heat shock 70 kDa 12B	0.6775	response to stress	NS	NS	NS	3.34642	1.1196e-13	7.64905	3.29649	2.17039e-13	7.50441	NS	1.01946	0.000637085	17.7162	3.89072	9.8175e-23	12.7116	3.84771	2.2198e-22	12.4946	2.9193	0.929676	0.00126767	17.686	3.94888	3.76669e-22	12.3672	3.93343	9.86963e-22	12.1501	2.93733
CGI_10020716	NS	0.873806	0.610524	0.742165	glutathione S-transferase omega-1-like	0.7	response to stress	NS	NS	NS	NS	NS	NS	NS	NS	NS	NS	0.908619	1.16896e-09	279.465	0.826705	3.41182e-11	297.305	0.886093	4.79138e-09	287.195	0.873806	0.6462	1.39739e-05	261.107	0.561219	3.39772e-06	278.445	0.624151	3.24562e-05	268.248	0.610524
CGI_10009339	NS	0.679952	0.403868	0.54191	flap endonuclease GEN homolog 1	0.545	response to stress	-1.37962	2.60938e-20	212.472	-1.2203	8.32344e-14	204.303	-1.25478	2.97046e-20	202.642	-1.2849	0.585505	0.0016425	380.205	0.732863	9.98084e-05	379.171	0.721488	1.96248e-05	374.357	0.679952	0.307218	0.0244418	355.264	0.458324	0.00149457	352.312	0.446063	7.45205e-05	347.965	0.403868
CGI_10004949	NS	0.345603	0.258887	0.302245	heat shock 70 kDa 12A-like	0.774	response to stress	0.159958	0.0344697	1253.74	0.239274	1.19662e-05	1271.69	NS	NS	NS	NS	0.355735	3.15062e-06	1315.01	0.432592	7.56004e-13	1336.36	0.248481	0.000322159	1389.98	0.345603	0.269617	0.00149812	1339.24	0.345502	4.61688e-07	1359.42	0.161542	0.0412275	1416.18	0.258887
CGI_10015615	NS	-0.325634	-0.289074	-0.307354	serine threonine- kinase Nek11-like	0.7355	response to stress	NS	NS	NS	-0.196895	0.00177679	583.612	NS	NS	NS	NS	-0.301897	0.00215382	493.027	-0.403129	1.27945e-06	533.249	-0.271875	0.00254788	497.882	-0.325634	-0.265025	0.000353798	525.305	-0.367075	1.05549e-09	567.81	-0.235121	0.000428306	530.303	-0.289074
CGI_10000279	NS	-0.85256	-0.865803	-0.859182	heat shock 70 kDa 12A-like [Crassostrea gigas]	0.6615	response to stress	NS	NS	NS	-0.428754	0.0106967	118.287	NS	NS	NS	NS	-0.810267	2.69067e-08	84.3526	-1.03614	1.17197e-10	97.8183	-0.711274	3.63908e-06	82.4938	-0.85256	-0.822408	2.97479e-06	88.4497	-1.04782	2.07589e-08	102.589	-0.727182	6.73782e-05	86.4307	-0.865803
CGI_10024937	NS	-2.00724	-1.65584	-1.83154	heat shock 70 kDa 12A-like [Crassostrea gigas]	0.693	response to stress	-1.78161	1.65077e-21	116.979	-1.12659	4.16936e-06	86.8392	NS	NS	NS	NS	-2.70913	2.95236e-54	101.837	-2.01506	1.49033e-18	72.0573	-1.29751	4.66978e-12	45.8364	-2.00724	-2.35443	5.80059e-53	111.339	-1.68169	1.66961e-15	80.1338	-0.93141	1.47913e-08	52.4405	-1.65584
CGI_10001236	-1.21869	-0.956233	-0.88673	-1.02055	Tripartite motif-containing 3	0.834	response to stress ; protein modification by small protein conjugation or removal	-1.63237	2.35261e-52	185.487	-0.828787	1.81918e-13	129.913	-1.19491	1.88412e-24	151.222	-1.21869	-1.36745	6.41719e-28	189.118	-0.572063	2.36619e-05	135.402	-0.929187	5.34497e-12	155.972	-0.956233	-1.2964	2.17578e-24	201.83	-0.502781	0.000294618	145.361	-0.861009	4.35621e-10	166.926	-0.88673
CGI_10012363	4.01102	3.28126	3.09482	3.46236	mucin-2-like isoform X7	0.653		5.061	4.09508e-81	482.649	4.15755	2.93533e-103	516.504	2.8145	9.79867e-47	545.157	4.01102	4.11326	2.60225e-35	320.85	3.50836	2.24208e-55	347.385	2.22215	1.64668e-23	378.85	3.28126	3.93485	2.75411e-31	295.157	3.31508	7.91953e-45	321.331	2.03453	6.13834e-18	355.168	3.09482
CGI_10001810	3.31105	3.4532	2.51055	3.0916	hypothetical protein CGI_10001810	1		2.73414	4.23403e-16	31.8282	3.66418	4.26102e-28	31.5381	3.53485	1.52377e-27	31.1296	3.31105	2.91934	1.93926e-19	36.1672	3.77754	1.98872e-32	36.085	3.66272	6.73668e-32	35.6575	3.4532	1.96235	2.73855e-07	20.8118	2.83021	1.64041e-14	20.0327	2.73909	3.73708e-14	19.8743	2.51055
CGI_10015008	3.31292	3.09487	2.33743	2.91507	Ankyrin-1	0.6495		3.25195	7.13834e-14	9.92189	3.4202	1.14128e-14	10.3373	3.26662	7.68472e-14	10.2142	3.31292	3.10099	6.75599e-14	7.12443	3.16795	1.2073e-14	7.41481	3.01566	9.69798e-14	7.3623	3.09487	2.29491	3.69304e-07	4.3863	2.41774	1.30765e-07	4.56449	2.29964	5.51351e-07	4.56563	2.33743
CGI_10015007	3.87939	2.43185	1.92075	2.744	ankyrin-1-like isoform X3	0.6625		3.73431	1.09072e-18	21.4078	3.84052	2.29582e-19	22.3757	4.06334	1.12686e-20	21.6832	3.87939	2.36772	8.51507e-08	5.38793	2.345	7.56353e-08	5.68647	2.58283	4.11572e-09	5.34153	2.43185	1.80954	9.50117e-05	2.90949	1.79868	0.000129573	3.11174	2.15404	5.05043e-06	2.8004	1.92075
CGI_10028447	2.23952	2.42655	3.38444	2.6835	allene oxide synthase-lipoxygenase -like	0.7467		1.84888	2.27175e-18	59.1025	2.23863	5.43055e-40	58.9034	2.63105	7.03994e-42	55.2031	2.23952	2.07254	1.91855e-12	72.6174	2.43967	1.5958e-20	73.0086	2.76744	1.45805e-22	69.2295	2.42655	2.98888	1.26377e-42	127.095	3.39574	3.21517e-76	129.476	3.7687	1.22069e-73	124.542	3.38444
CGI_10002793	3.18467	2.30711	2.19822	2.56333	fibril-forming collagen alpha chain-like isoform X3	0.6445		2.7979	3.7598e-21	30.5041	3.60373	1.01897e-28	30.1218	3.15237	2.95633e-24	30.291	3.18467	1.94958	1.17914e-09	17.2018	2.70376	1.34551e-15	16.3179	2.26799	6.10114e-12	16.76	2.30711	1.81557	1.84111e-08	16.555	2.60991	3.13961e-14	15.5406	2.16918	1.02846e-10	16.033	2.19822
CGI_10000406	3.00916	2.942	1.65337	2.53484	TPR and ankyrin repeat-containing 1-like [Crassostrea gigas]	0.8227		2.9884	4.12379e-17	15.2497	2.88859	2.33951e-14	15.8976	3.15048	1.73879e-18	15.4622	3.00916	2.96058	4.8533e-16	16.6871	2.78119	4.15631e-13	17.379	3.08425	9.81984e-18	16.9514	2.942	1.65182	8.23878e-05	6.34386	1.48868	0.00113364	6.62872	1.8196	1.37376e-05	6.37617	1.65337
CGI_10028085	2.16137	2.55432	2.4545	2.39006	Zinc metallo ase nas-36	0.9573		2.33824	9.98876e-38	320.193	1.80641	2.86997e-39	359.56	2.33947	2.4862e-71	328.835	2.16137	2.72596	7.93239e-52	399.713	2.19992	1.52822e-57	441.394	2.73708	9.3047e-97	410.342	2.55432	2.6259	7.45664e-51	392.28	2.09804	9.93124e-60	434.902	2.63955	3.2202e-104	402.64	2.4545
CGI_10002639	2.52477	3.35924	1.21907	2.36769	Multiple epidermal growth factor-like domains 10	0.569		1.93374	1.84052e-13	54.5965	2.55992	3.30445e-24	52.9848	3.08064	3.92135e-30	49.6373	2.52477	2.77543	2.17913e-41	86.9899	3.39125	7.67859e-63	86.7281	3.91104	1.87959e-68	82.9253	3.35924	0.625354	0.024403	27.0324	1.23955	5.32548e-07	24.178	1.79231	1.68766e-11	21.3422	1.21907
CGI_10018471	3.06045	2.26632	1.64822	2.325	Breast cancer type 1 susceptibility	0.6795		2.85083	6.40821e-107	168.847	2.00747	6.93697e-59	192.841	4.32305	6.25791e-139	158.793	3.06045	2.06596	1.47334e-30	105.506	1.23705	1.62767e-12	126.484	3.49593	5.99345e-62	94.6602	2.26632	1.43688	1.42018e-18	77.1306	0.596069	0.000325084	97.8086	2.91172	5.58015e-49	64.8972	1.64822
CGI_10017180	3.03165	2.47826	1.43325	2.31439	kelch 9 [Crassostrea gigas]	0.7075		3.20466	2.82881e-13	7.13857	2.95887	1.31696e-11	7.65373	2.93144	1.34062e-11	7.54754	3.03165	2.70285	6.11e-10	4.55066	2.37313	3.19402e-08	4.94955	2.3588	2.88218e-08	4.90482	2.47826	1.60623	0.000543723	2.24629	1.31383	0.00781288	2.56291	1.37969	0.00521338	2.55844	1.43325
CGI_10017294	3.47969	2.13767	1.25047	2.28928	tumor necrosis factor receptor superfamily member 27-like isoform X2	0.9767		3.51004	3.54365e-18	10.3255	3.43429	6.73091e-18	10.9191	3.49475	5.0733e-18	10.6055	3.47969	2.21654	5.3776e-07	3.83202	2.061	2.10384e-06	4.15293	2.13547	9.33016e-07	3.98276	2.13767	1.3184	0.0063367	1.73414	1.16079	0.0205891	1.97953	1.27222	0.0106034	1.84237	1.25047
CGI_10002538	2.20993	1.88525	2.72461	2.27327	ficolin-2- partial	0.8575		0.746143	0.000501213	46.3709	2.67565	3.42091e-25	34.4761	3.20801	3.21204e-29	32.3376	2.20993	0.430613	0.0499807	39.3377	2.34678	7.86897e-21	27.5196	2.87836	3.08554e-25	25.5985	1.88525	1.39166	2.09989e-06	69.6546	3.15581	1.10546e-23	58.2999	3.62636	1.04297e-27	55.7638	2.72461
CGI_10019248	2.38455	1.97004	2.27704	2.21054	PREDICTED: uncharacterized protein LOC105338812	0.8625		1.64795	7.04098e-11	117.494	2.07185	2.06051e-13	114.298	3.43384	9.54505e-70	100.679	2.38455	1.25485	2.66425e-06	92.5509	1.66088	1.06006e-08	88.4955	2.99439	2.25359e-47	75.7955	1.97004	1.53517	2.70166e-10	112.616	1.95669	5.18036e-13	108.881	3.33925	4.4342e-82	95.2273	2.27704
CGI_10011245	2.98016	2.37122	1.25407	2.20182	hypothetical protein CGI_10011245	0.583		2.42242	1.27544e-26	68.3662	2.93411	2.56094e-36	67.8678	3.58394	3.21754e-61	64.085	2.98016	1.86304	2.53138e-10	50.6442	2.30063	5.08605e-14	49.4897	2.95	1.40988e-26	46.2287	2.37122	0.725417	0.0234712	27.4334	1.1963	0.000220534	25.1819	1.8405	2.71245e-11	22.191	1.25407
CGI_10010903	2.39637	2.60086	1.49877	2.16533	tetraspanin-1-like [Crassostrea gigas]	0.7965		2.57575	1.33647e-23	97.0909	1.82789	6.93113e-15	111.434	2.78547	4.4512e-35	97.9261	2.39637	2.78895	3.14514e-33	106.997	2.02167	5.30578e-22	121.392	2.99198	8.50711e-51	108.142	2.60086	1.67626	4.95345e-08	58.951	0.947822	0.00129075	71.9895	1.87222	1.22094e-11	59.0069	1.49877
CGI_10000827	2.88628	2.31383	1.19753	2.13255	TPR and ankyrin repeat-containing 1-like [Crassostrea gigas]	0.8643		2.7655	1.6436e-10	5.6689	2.9022	5.24767e-11	5.85974	2.99115	1.96422e-11	5.6934	2.88628	2.2544	3.56498e-07	4.3441	2.29634	1.89232e-07	4.48179	2.39073	5.13386e-08	4.35004	2.31383	1.11276	0.0236159	1.4336	1.1648	0.0200372	1.45298	1.31502	0.00757519	1.3713	1.19753
CGI_10020413	2.77555	2.05146	1.11875	1.98192	cytoplasmic [Crassostrea gigas]	0.8095		2.91807	3.34749e-65	203.655	2.58969	4.15483e-62	218.621	2.81888	7.11125e-64	209.665	2.77555	2.18625	8.24976e-16	139.391	1.87487	7.56903e-13	151.514	2.09325	3.37707e-15	144.162	2.05146	1.26014	2.18107e-07	81.1224	0.930501	5.75627e-05	91.2582	1.16559	1.03865e-06	84.7071	1.11875
CGI_10027317	2.48809	1.69632	1.74403	1.97614	neuronal growth regulator 1-like isoform X3	0.8345		2.9059	2.40724e-14	158.916	2.60179	3.45206e-50	177.792	1.95657	9.71117e-50	189.138	2.48809	2.17951	3.96835e-08	94.1334	1.7665	4.59103e-14	109.971	1.14294	2.70502e-08	122.375	1.69632	2.37248	6.37609e-12	94.3646	1.75287	3.82349e-21	110.826	1.10674	1.33325e-14	123.954	1.74403
CGI_10011440	2.43542	1.54555	1.94235	1.97444	Cytochrome b5	0.7735		2.55411	1.78386e-24	102.098	2.63016	5.67388e-42	106.644	2.12199	6.00236e-31	110.817	2.43542	1.68699	1.31185e-11	57.7252	1.72777	2.07915e-21	60.4028	1.2219	1.47688e-12	65.3953	1.54555	2.07318	4.01057e-18	76.2503	2.13047	3.51487e-35	79.6652	1.62341	1.15152e-23	84.611	1.94235
CGI_10010908	1.72834	2.52274	1.53377	1.92828	hypothetical protein CGI_10010908	1		1.84543	1.25678e-05	4.91555	1.36701	0.000942679	5.68441	1.97258	6.83574e-06	4.91576	1.72834	2.64659	5.73319e-12	9.69048	2.20744	1.70052e-09	10.6309	2.71419	3.12936e-12	9.80513	2.52274	1.65303	0.000116596	4.55622	1.18214	0.00572564	5.32102	1.76615	7.3659e-05	4.54867	1.53377
CGI_10027559	1.79984	2.14293	1.77242	1.90507	hypothetical protein CGI_10027559	0.8933		1.68789	0.00033742	3.0814	2.0769	1.52168e-05	2.99459	1.63473	0.000672008	3.19192	1.79984	2.0702	2.0826e-06	4.48197	2.36856	5.23361e-08	4.45515	1.99004	4.0626e-06	4.62604	2.14293	1.6656	0.000323003	3.53437	2.0181	1.54552e-05	3.45673	1.63356	0.000570242	3.65622	1.77242
CGI_10005738	1.71234	1.62872	2.32126	1.88744	hypothetical protein CGI_10005738	0.6506		1.66144	1.90915e-07	41.2645	1.72722	1.1182e-11	43.1693	1.74835	1.23488e-18	42.6803	1.71234	1.58401	6.02673e-07	38.6978	1.63568	1.36264e-10	40.4707	1.66647	9.48632e-17	40.0788	1.62872	2.23888	1.14176e-12	63.597	2.33824	3.96871e-19	66.3445	2.38666	3.07247e-28	65.5082	2.32126
CGI_10018032	1.26762	2.41652	1.96296	1.88237	hypothetical protein CGI_10018032	0.7645		1.63235	1.52558e-13	42.0052	1.18055	2.09767e-11	47.9988	0.989951	2.3687e-08	49.3567	1.26762	2.76343	2.02238e-39	82.5863	2.33565	9.85914e-43	90.0676	2.15049	5.33494e-37	90.6915	2.41652	2.30889	2.16195e-25	65.3266	1.88234	4.08454e-26	72.3171	1.69765	1.07612e-21	73.3403	1.96296
CGI_10026660	2.21456	1.32854	2.09416	1.87908	ATP-dependent DNA helicase recQ	0.67		1.89247	2.54319e-05	5.31603	2.26649	4.49466e-07	5.36681	2.48471	3.67885e-08	5.08772	2.21456	1.05793	0.0334294	2.9059	1.34542	0.00481447	2.86176	1.58228	0.000636069	2.63827	1.32854	1.79413	3.2796e-05	4.75215	2.128	9.1295e-07	4.77169	2.36033	8.10533e-08	4.50425	2.09416
CGI_10003126	1.5955	1.92853	2.11256	1.87886	Homeobox ARX	0.8425		1.03576	2.25929e-07	78.2346	1.63142	2.72561e-11	71.6886	2.11931	7.25144e-21	65.7415	1.5955	1.37021	5.09965e-17	89.5509	1.9528	2.04609e-20	83.6878	2.46258	6.44901e-38	77.7394	1.92853	1.56717	6.07091e-14	106.979	2.13869	5.54896e-18	101.272	2.63182	1.37426e-29	94.7485	2.11256
CGI_10004118	1.8013	1.57484	2.19714	1.85776	Multiple epidermal growth factor-like domains 10	0.755		2.26889	1.64704e-54	526.952	1.87019	1.21093e-28	577.104	1.26481	3.58746e-15	630.133	1.8013	2.04814	3.51225e-62	447.152	1.63914	1.77653e-27	493.208	1.03724	4.65702e-13	546.906	1.57484	2.66938	1.26125e-89	685.882	2.26052	2.54783e-47	742.394	1.66152	5.01922e-29	794.85	2.19714
CGI_10002444	2.12059	1.94773	1.36856	1.81229	Kielin chordin	0.885		2.06107	1.46787e-06	82.923	2.32682	7.46e-07	81.5474	1.97387	1.10752e-08	89.7535	2.12059	2.03932	1.55649e-08	64.5986	2.09605	1.90563e-06	62.5078	1.70783	1.4021e-08	70.9072	1.94773	1.39498	0.000386233	44.0715	1.67302	0.00032893	40.8941	1.0377	0.00216822	50.1551	1.36856
CGI_10014145	1.82744	1.7089	1.85696	1.79777	ceramide kinase-like isoform X2	0.715		2.06211	3.25439e-12	19.6902	0.896983	0.0158191	25.3552	2.52323	6.14386e-15	18.9542	1.82744	1.95231	2.92798e-11	18.1212	0.790366	0.0347586	23.5912	2.38403	4.16105e-14	17.4	1.7089	2.08879	3.64938e-12	21.1054	0.938999	0.0109354	26.9384	2.5431	6.16462e-15	20.3789	1.85696
CGI_10023468	1.8765	1.75037	1.48693	1.7046	beta-1,3-galactosyl-O-glycosyl-glyco beta-1,6-N-acetylglucosaminyltransferase 3-like [Lingula anatina]	0.778		1.92159	1.89472e-13	36.2879	2.10543	8.49507e-19	37.0864	1.60247	3.23481e-09	39.0483	1.8765	1.8004	5.9631e-11	33.7088	1.96951	2.86982e-15	34.4023	1.4812	1.49792e-07	36.4079	1.75037	1.53144	5.44808e-08	30.1116	1.70526	1.91081e-11	30.6188	1.22408	2.71278e-05	32.8091	1.48693
CGI_10011491	1.50453	2.04674	1.55319	1.70149	Cytochrome P450 1A2	0.736		1.35405	7.61925e-06	32.3109	0.989666	5.55895e-06	37.0594	2.16987	2.62032e-17	29.2552	1.50453	1.88914	1.59491e-12	42.9636	1.53871	2.48045e-16	48.0447	2.71236	1.62753e-32	40.2758	2.04674	1.40192	2.6566e-05	35.3334	1.06866	6.78343e-05	40.2867	2.18899	1.88509e-13	32.2761	1.55319
CGI_10020194	1.21555	1.36919	2.4727	1.68581	multiple epidermal growth factor-like domains 10	0.663		1.1396	9.17098e-05	22.1331	1.64057	1.72499e-08	20.8492	0.866488	0.00388889	24.1602	1.21555	1.30127	9.45289e-06	23.8927	1.77645	1.13562e-09	22.7238	1.02986	0.000532158	25.924	1.36919	2.39748	3.59614e-28	46.1977	2.8976	7.41347e-37	45.784	2.12301	5.41306e-23	48.7707	2.4727
CGI_10011108	1.06401	2.02959	1.87662	1.65674	peptidylprolyl isomerase [Schistosoma japonicum]	0.857		1.03466	0.0153628	9.26868	1.16284	0.00735747	9.34711	0.994537	0.0193396	9.65303	1.06401	2.00988	1.30753e-09	16.345	2.1188	2.96419e-10	16.7075	1.96011	1.34924e-09	16.8975	2.02959	1.84374	6.29852e-10	14.3915	1.98009	9.20588e-11	14.6601	1.80604	8.11142e-10	14.8963	1.87662
CGI_10000981	1.22914	1.98021	1.57774	1.5957	multiple epidermal growth factor-like domains 11 [Crassostrea gigas]	0.7415		1.2227	0.0143542	1.21441	1.17952	0.0244718	1.33849	1.2852	0.0122909	1.23916	1.22914	1.99163	1.31626e-05	2.97467	1.93542	2.02077e-05	3.16496	2.01358	8.22417e-06	3.0377	1.98021	1.56322	0.000954048	1.85647	1.52314	0.00173113	2.00546	1.64687	0.00068132	1.89503	1.57774
CGI_10009562	1.47862	2.12398	1.1763	1.59297	hypothetical protein CGI_10009562	0.6905		1.43676	2.00948e-09	28.6458	1.59514	2.91972e-11	28.8777	1.40395	1.08666e-09	29.3535	1.47862	2.08672	2.74647e-21	40.7475	2.23298	4.09138e-24	41.4732	2.05225	1.82543e-22	41.743	2.12398	1.1315	6.47436e-05	25.3855	1.28682	4.35055e-06	25.4546	1.1106	4.51178e-05	26.0421	1.1763
CGI_10009141	1.19568	1.23207	2.26588	1.56454	Werner syndrome ATP-dependent helicase	0.783		0.879716	0.0145831	14.7985	1.11099	0.00318081	14.4885	1.59635	2.40372e-05	12.7806	1.19568	0.934596	0.00765914	14.8752	1.1442	0.00167416	14.589	1.61741	8.15842e-06	12.9398	1.23207	1.94414	4.8365e-12	27.7331	2.17535	2.94725e-13	27.8935	2.67816	7.20817e-18	25.9273	2.26588
CGI_10014777	1.29355	2.08454	1.2834	1.55383	metal binding	0.6967		0.851459	0.00270956	25.9234	1.61906	3.53333e-08	22.7799	1.41014	7.35249e-07	23.2686	1.29355	1.6561	2.38739e-11	39.2402	2.39723	1.23337e-19	36.73	2.20029	6.06235e-18	36.9724	2.08454	0.835886	0.000910529	26.2039	1.60965	1.40563e-09	22.9491	1.40466	4.42439e-08	23.4757	1.2834
CGI_10015934	1.3865	1.06707	1.95858	1.47072	ADP-ribosylation factor-like	0.8355		1.24184	0.00136029	12.6163	1.5659	3.04677e-06	12.5343	1.35175	0.000346921	12.6596	1.3865	0.953674	0.0424153	11.4727	1.21893	0.00449223	11.3551	1.02862	0.0237574	11.5179	1.06707	1.79764	2.51629e-06	19.9172	2.14991	4.15233e-10	20.0854	1.92819	2.79745e-07	20.1032	1.95858
CGI_10005044	1.8167	1.44163	0.907349	1.38856	Zygote arrest 1	0.8208		2.31913	8.67739e-34	143.04	1.51696	1.25571e-20	168.154	1.61401	1.8398e-23	162.175	1.8167	1.94493	1.33352e-22	112.369	1.13945	2.63725e-11	135.664	1.24049	2.38329e-13	130.536	1.44163	1.4204	9.96564e-14	87.2147	0.598983	0.000310198	110.489	0.702664	1.41451e-05	105.593	0.907349
CGI_10022977	1.5639	1.11774	1.41931	1.36698	hypothetical protein CGI_10022977	0.97		1.90756	5.87673e-06	11.9228	1.46426	0.000152364	13.7481	1.31987	0.000659018	13.9326	1.5639	1.49057	0.000431271	8.37279	0.998948	0.0109856	10.0195	0.863695	0.0277734	10.2675	1.11774	1.84923	4.3727e-07	10.1276	1.27324	9.0203e-05	11.908	1.13547	0.00046822	12.1449	1.41931
CGI_10002292	0.926488	1.48011	1.69069	1.36576	phosphatidylinositol phosphatase PTPRQ-like isoform X1 [Crassostrea gigas]	0.8013		0.826884	1.4122e-07	185.001	0.472462	0.000164613	212.719	1.48012	3.23958e-26	163.941	0.926488	1.37936	1.33548e-18	236.877	1.03055	3.36488e-16	266.119	2.03044	2.66725e-44	217.804	1.48011	1.58751	1.60517e-21	279.675	1.24371	1.4216e-19	311.495	2.24085	1.86331e-46	259.973	1.69069
CGI_10005686	1.36687	1.54575	1.10787	1.34016	proline-rich transmembrane 1-like	0.6806		2.04765	3.30386e-59	952.92	1.31171	3.41733e-22	1120.44	0.74124	2.66839e-07	1253.34	1.36687	2.23	4.01612e-86	1028.06	1.48669	4.901e-34	1194.64	0.920564	1.16658e-12	1323.5	1.54575	1.78672	2.31342e-41	846.028	1.04984	1.03896e-13	1011.66	0.487055	0.00167338	1151.19	1.10787
CGI_10000756	1.48444	1.26876	1.22046	1.32455	hypothetical protein CGI_10000756	0.6936		1.57828	0.000103027	113.017	1.75245	2.8791e-08	118.693	1.12259	0.000842574	131.241	1.48444	1.46097	4.22698e-06	90.4123	1.50003	5.90061e-10	95.0456	0.845268	0.00178113	107.755	1.26876	1.33745	0.00303125	112.939	1.42196	0.000922388	118.481	0.901959	0.048812	131.537	1.22046
CGI_10013997	1.22931	1.18665	1.45845	1.29147	collagen alpha-1(XII) chain-like	0.7125		2.19938	1.81577e-37	130.531	0.560718	0.000560932	188.584	0.927828	4.12245e-10	167.91	1.22931	2.13362	1.63038e-24	126.232	0.53145	0.0111342	182.686	0.894865	2.60201e-06	162.695	1.18665	2.39199	5.2728e-27	157.875	0.810207	0.000160085	218.291	1.17316	9.2484e-09	196.734	1.45845
CGI_10009137	1.30949	0.743	1.42252	1.15834	muscle M-line assembly unc-89-like	0.6545		1.48219	8.7133e-20	151.142	1.40523	7.84545e-26	159.787	1.04105	3.12863e-13	169.159	1.30949	0.914797	6.49685e-06	111.58	0.832962	2.86407e-06	118.564	0.481241	0.0124213	128.491	0.743	1.59037	3.40277e-19	165.567	1.51696	7.2973e-24	174.733	1.16024	2.04087e-13	184.293	1.42252
CGI_10010106	1.39073	1.04981	0.98221	1.14092	programmed cell death 4-like	0.793		0.904462	2.30395e-07	948.297	1.76599	4.43236e-32	832.707	1.50174	5.55977e-23	854	1.39073	0.571318	0.00379537	795.392	1.41733	4.68882e-18	677.544	1.16077	2.63472e-12	701.438	1.04981	0.490454	0.000100722	804.217	1.35921	7.82348e-64	678.371	1.09697	2.3253e-38	704.033	0.98221
CGI_10019850	1.20986	1.15274	0.983791	1.11546	platelet endothelial aggregation receptor 1-like	0.845		0.972326	2.79138e-07	43.193	1.08622	6.13974e-06	43.4313	1.57102	2.67915e-13	38.7822	1.20986	0.919298	6.02482e-07	40.9246	1.02438	1.0673e-05	41.106	1.51455	2.2375e-13	36.6506	1.15274	0.741547	3.42867e-05	39.7171	0.858608	0.000162195	39.7514	1.35122	1.32618e-11	35.1132	0.983791
CGI_10014352	1.05662	1.18776	1.08084	1.10841	acetyl- carboxylase 1 isoform X2 [Haplochromis burtoni]	0.8085		0.837598	6.80608e-06	116.509	1.37627	2.65172e-13	107.408	0.956011	2.97217e-07	115.413	1.05662	0.969684	5.71789e-10	120.339	1.50564	1.08524e-20	111.726	1.08795	6.11375e-12	119.531	1.18776	0.863063	1.93776e-06	120.739	1.39657	2.26512e-14	111.372	0.982879	5.912e-08	119.655	1.08084
CGI_10002916	1.02463	1.13703	1.12517	1.09561	AT-rich interactive domain-containing 1B-like	0.6357		0.749526	0.00537953	128.608	1.71615	2.59947e-11	108.723	0.608222	0.0352715	136.646	1.02463	0.854071	1.15493e-07	129.166	1.85509	8.86777e-30	109.913	0.701939	0.000205135	137.135	1.13703	0.851129	0.000715895	138.284	1.81467	8.52011e-14	118.009	0.709701	0.00762544	146.576	1.12517
CGI_10002068	0.825969	1.37648	1.01004	1.07083	von Willebrand factor D and EGF domain-containing -like	0.628		0.593172	0.0318294	35.2047	0.922479	7.14458e-05	33.5743	0.962257	2.9433e-06	32.8413	0.825969	1.14188	3.89336e-05	45.5895	1.46818	3.98134e-09	44.4595	1.51939	2.25046e-11	43.579	1.37648	0.776407	0.00299304	39.4501	1.10319	1.0568e-06	37.9109	1.15054	9.27066e-09	37.1171	1.01004
CGI_10018491	1.18946	1.02757	0.950144	1.05573	apolipo D-like	0.591		1.04479	4.39389e-10	437.816	1.05984	3.62389e-14	455.04	1.46376	4.24251e-18	409.395	1.18946	0.885592	3.76603e-07	395.813	0.895398	1.35545e-09	411.418	1.30173	8.18217e-14	368.068	1.02757	0.805689	9.32367e-10	398.757	0.813595	1.25733e-18	414.358	1.23115	9.88703e-20	368.792	0.950144
CGI_10004123	1.06775	0.968533	1.05853	1.0316	nuclear pore complex Nup98-Nup96-like	0.671		0.958231	1.02897e-12	617.929	0.87243	4.56231e-26	658.572	1.3726	1.52583e-19	575.68	1.06775	0.860481	1.89339e-10	575.237	0.771095	4.97743e-21	613.649	1.27402	3.09699e-17	534.061	0.968533	0.949798	4.39269e-12	631.453	0.861244	9.88357e-24	672.665	1.36454	6.09193e-19	588.198	1.05853
CGI_10000895	0.974546	0.84457	1.23863	1.01925	N-acetylglucosamine-6-phosphate deacetylase	0.632		0.64763	3.33703e-05	109.215	0.841157	4.81184e-05	107.548	1.43485	4.74285e-21	92.9586	0.974546	0.518789	0.00105956	100.853	0.710637	0.000703237	99.0126	1.30428	5.07853e-18	85.0023	0.84457	0.913746	3.55781e-10	126.424	1.09885	1.90557e-08	125.227	1.70329	1.35608e-31	110.095	1.23863
CGI_10020079	1.50555	0.969569	0.571851	1.01566	hypothetical protein CGI_10020079	1		1.42259	1.35069e-17	239.349	1.63037	1.09926e-19	239.808	1.46369	1.28334e-20	242.719	1.50555	0.888014	1.54855e-09	178.033	1.0936	1.49226e-11	176.18	0.927093	4.91762e-12	180.318	0.969569	0.48989	0.00371434	157.256	0.697665	0.000112836	154.083	0.527999	0.000642824	158.941	0.571851
CGI_10005289	1.11237	0.876035	1.04425	1.01089	autophagy-related 9A-like	0.6795		0.719821	7.55635e-06	78.9447	1.64919	1.6713e-27	67.2741	0.968102	2.94481e-13	75.9365	1.11237	0.48902	0.00886813	69.6681	1.40418	4.01406e-17	57.9943	0.734905	8.03774e-07	66.6403	0.876035	0.658485	0.00128882	79.1616	1.56833	8.31545e-17	67.0662	0.905939	8.46799e-08	76.043	1.04425
CGI_10015767	1.3348	0.803711	0.86334	1.00062	hypothetical protein CGI_10015767	0.8		1.62533	6.96806e-13	260.729	1.22637	1.11379e-06	292.475	1.15269	5.38016e-06	291.139	1.3348	1.09567	4.50731e-07	189.982	0.692071	0.00640956	218.199	0.623388	0.0150869	218.462	0.803711	1.1393	5.21099e-05	209.977	0.757565	0.0139022	240.031	0.693152	0.026064	240.018	0.86334
CGI_10005977	0.729262	1.25395	0.876472	0.953228	collagen alpha-6(VI) chain-like	0.604		1.18893	5.42751e-19	103.799	0.500285	0.00642368	127.984	0.498573	2.26904e-05	126.097	0.729262	1.70297	7.47732e-23	134.787	1.02283	2.85838e-07	159.676	1.03605	2.98976e-11	157.35	1.25395	1.28083	2.49992e-05	120.354	0.672446	0.043018	145.568	0.676139	0.0285424	143.429	0.876472
CGI_10007761	0.806607	0.950133	1.02856	0.928435	rho guanine nucleotide exchange factor 39-like	0.702		0.738958	8.33013e-06	68.5039	0.814146	9.61445e-08	69.9162	0.866718	6.49967e-09	67.6683	0.806607	0.883967	1.43144e-08	71.4229	0.954507	4.11811e-11	72.9862	1.01193	9.9057e-13	70.7798	0.950133	0.959987	1.18914e-06	78.6547	1.03392	2.22001e-08	80.4016	1.09178	1.48701e-09	77.9866	1.02856
CGI_10006082	0.838198	0.769428	1.16632	0.92465	Multiple epidermal growth factor-like domains 10	0.671		0.878355	0.000142266	170.622	0.748499	0.000544138	184.195	0.887739	0.000466029	173.481	0.838198	0.813539	1.98975e-06	159.502	0.674134	6.79333e-06	172.422	0.820613	6.05731e-05	162.214	0.769428	1.20948	7.89971e-13	203.536	1.07486	3.91031e-13	218.495	1.21463	1.27315e-09	207.065	1.16632
CGI_10014667	1.5601	0.715133	0.43213	0.902453	hypothetical protein CGI_10014667	0.6195		1.52789	1.10075e-30	161.646	1.55338	1.06058e-33	167.467	1.59901	1.54004e-32	163.025	1.5601	0.68487	1.28718e-05	104.692	0.704842	2.67321e-06	108.189	0.755686	1.48571e-06	105.036	0.715133	0.401877	0.0164028	97.6457	0.421123	0.00811131	100.788	0.473391	0.0039133	97.6374	0.43213
CGI_10008539	0.751339	0.687655	1.16194	0.866979	hypothetical protein CGI_10008539	0.95		0.456614	0.0188996	49.3871	0.631578	0.00111028	48.893	1.16582	4.68899e-07	41.7701	0.751339	0.391284	0.0292687	46.701	0.563541	0.00137663	46.1528	1.10814	8.45572e-08	39.2882	0.687655	0.876493	1.7806e-05	61.2059	1.04523	3.75595e-07	61.0942	1.56411	9.56938e-11	53.6331	1.16194
CGI_10013998	0.839244	0.78887	0.935738	0.854617	zinc finger MYM-type 2-like	0.724		0.891619	1.92005e-06	201.698	0.853747	1.0974e-07	212.596	0.772366	2.31713e-07	212.948	0.839244	0.841964	0.000134177	193.507	0.799483	5.79687e-05	203.965	0.725162	0.000134721	204.531	0.78887	0.984166	4.0342e-05	219.607	0.947718	1.68408e-05	231.24	0.875329	4.31357e-05	231.48	0.935738
CGI_10022551	0.972721	1.07873	0.463419	0.838291	probable deferrochelatase peroxidase [Biomphalaria glabrata]	0.7755		1.13906	1.21924e-15	435.293	1.07851	3.80287e-26	460.567	0.700589	6.48738e-19	495.754	0.972721	1.24356	7.33792e-18	447.353	1.18148	1.71802e-28	472.831	0.811157	3.85345e-21	507.153	1.07873	0.63451	2.54697e-05	353.173	0.564879	1.83097e-07	375.25	0.190869	0.0342055	413.3	0.463419
CGI_10016127	1.45138	0.559242	0.497275	0.835966	Pancreatic secretory granule membrane major glyco GP2	0.6465		1.18348	1.02041e-22	1097.52	1.64341	8.94615e-31	1044.4	1.52726	3.78883e-35	1046.78	1.45138	0.291226	0.0416332	720.355	0.750915	7.90733e-07	654.476	0.635585	1.48571e-06	664.226	0.559242	0.226682	0.0315243	739.341	0.691132	6.70759e-08	668.947	0.574012	1.73616e-08	679.481	0.497275
CGI_10014030	0.812735	0.880082	0.799357	0.830725	hypothetical protein CGI_10014030	0.84		1.29728	9.09677e-14	89.2311	0.700508	3.28341e-05	107.235	0.44042	0.00201582	113.189	0.812735	1.36293	2.58657e-15	90.0546	0.764753	4.00811e-06	107.687	0.51256	0.000212389	113.503	0.880082	1.27221	1.85788e-09	91.4864	0.686183	0.000879188	109.883	0.439679	0.018911	116.033	0.799357
CGI_10001871	0.703924	0.939864	0.824133	0.82264	Origin recognition complex subunit 3	0.7195		0.676529	0.018647	22.8601	0.643897	0.0131398	24.1397	0.791346	0.00373157	22.6872	0.703924	0.914396	0.000151143	24.8738	0.876088	7.8165e-05	26.2236	1.02911	8.83916e-06	24.7771	0.939864	0.796767	0.00125744	24.6554	0.759938	0.000781739	26.0105	0.915694	0.000108477	24.5054	0.824133
CGI_10019869	0.720237	0.679545	0.922808	0.774197	inhibitor of apoptosis	0.691		0.713007	7.23645e-07	138.636	0.847903	1.48149e-09	139.313	0.5998	1.76354e-05	145.96	0.720237	0.673702	2.60095e-09	132.201	0.804599	3.78642e-13	132.741	0.560333	1.97522e-07	139.362	0.679545	0.916698	1.38451e-14	155.652	1.04775	3.4461e-19	156.814	0.803974	1.16032e-12	163.443	0.922808
CGI_10025051	0.928446	0.781399	0.523541	0.744462	sideroflexin-5-like [Biomphalaria glabrata]	0.847		0.854325	8.51443e-09	302.931	0.963707	7.23555e-12	307.108	0.967305	2.6361e-10	300.513	0.928446	0.708212	3.0906e-15	274.409	0.813729	2.55319e-23	277.646	0.822255	5.9089e-16	271.934	0.781399	0.450641	2.49559e-07	259.226	0.554787	2.59556e-12	261.374	0.565195	1.49977e-08	255.786	0.523541
CGI_10004422	0.549937	1.11485	0.524766	0.72985	CCAAT enhancer-binding zeta	0.5375		0.459947	0.000274007	292.198	0.474474	0.0114045	302.077	0.71539	1.59913e-09	277.729	0.549937	1.04585	0.00302326	403.142	1.03796	0.00507549	417.512	1.26073	0.000217918	391.746	1.11485	0.436048	0.00753017	297.36	0.448043	0.0339426	307.341	0.690206	6.2926e-06	282.557	0.524766
CGI_10024491	0.677632	0.80266	0.617991	0.699428	peptidyl-tRNA hydrolase mitochondrial	0.721		0.592248	0.011243	30.7792	0.856324	2.89828e-05	29.9671	0.584324	0.00545895	31.7101	0.677632	0.718932	0.0066965	32.0091	0.97557	2.27099e-05	31.295	0.713478	0.00243037	32.9867	0.80266	0.53318	0.0285347	30.7339	0.792872	0.000178979	29.8559	0.527921	0.0144829	31.6705	0.617991
CGI_10018297	0.823656	0.815153	0.44975	0.696186	serine ase [Ixodes scapularis]	0.636		0.942971	2.93527e-05	933.914	0.843222	8.89122e-05	999.23	0.684774	0.00263926	1021.34	0.823656	0.940392	6.70538e-10	895.566	0.831833	3.42384e-10	958.137	0.673234	5.8119e-06	980.771	0.815153	0.576745	8.63021e-05	799.04	0.464934	0.000164665	858.965	0.30757	0.0365548	885.027	0.44975
CGI_10009359	0.762169	0.551027	0.603513	0.638903	Fibroblast growth factor receptor 2	0.5465		0.504257	1.00381e-10	1937.8	0.917194	1.75824e-30	1807.49	0.865055	1.40945e-29	1795.12	0.762169	0.292813	3.18212e-06	1734.14	0.703799	8.41313e-27	1601.2	0.656468	8.70777e-27	1593.56	0.551027	0.345643	1.91445e-08	1863.28	0.755988	9.30614e-31	1724.22	0.708908	8.76786e-31	1714.98	0.603513
CGI_10027059	0.624245	0.706011	0.566109	0.632122	Aspartate mitochondrial	0.851		0.381352	0.0407496	683.937	0.470761	0.00634491	692.583	1.02062	4.66493e-10	587.11	0.624245	0.459453	2.17515e-05	684.655	0.546447	1.89724e-08	694.085	1.11213	1.04742e-29	591.535	0.706011	0.319633	0.00258987	681.709	0.405476	1.35413e-05	689.857	0.97322	1.10603e-25	582.377	0.566109
CGI_10021706	0.927597	0.473265	0.433647	0.611503	multiple coagulation factor deficiency 2 isoform X1 [Mandrillus leucophaeus]	0.7925		0.863708	1.25819e-17	164.71	0.979764	1.97757e-16	166.585	0.939319	6.26252e-19	165.033	0.927597	0.410322	0.00226424	132.189	0.522535	0.000547722	132.882	0.486937	0.000367964	132.034	0.473265	0.369735	0.00129198	136.936	0.483879	0.000267428	137.514	0.447328	0.000146448	136.621	0.433647
CGI_10015771	0.585865	0.527506	0.654657	0.589343	BTB and MATH domain-containing 38-like	0.6435		0.817717	8.95678e-08	76.8382	0.475989	0.00627316	87.83	0.463891	0.0077331	86.44	0.585865	0.75799	7.16475e-06	73.0415	0.415627	0.0323798	83.662	0.408901	0.0322557	82.4003	0.527506	0.887102	3.89916e-09	81.3171	0.541858	0.00130283	92.6351	0.535012	0.00133727	91.1909	0.654657
CGI_10005713	0.559395	0.460926	0.736893	0.585738	DNA-directed RNA polymerase II subunit RPB7	0.9575		0.619073	0.00200607	52.5535	0.560065	0.00533854	55.5926	0.499047	0.00710148	55.5743	0.559395	0.521511	0.00979537	48.9792	0.4581	0.0259704	51.8579	0.403166	0.0319658	51.9262	0.460926	0.798856	4.45134e-07	58.2106	0.733886	4.15838e-06	61.481	0.677936	4.04973e-06	61.4099	0.736893
CGI_10025145	0.643533	0.68947	0.420459	0.584487	WD repeat-containing mio	0.758		0.580355	8.33924e-08	187.018	0.774341	4.28033e-12	184.512	0.575901	2.24851e-08	191.156	0.643533	0.626743	1.54854e-09	185.55	0.816831	3.76394e-14	183.259	0.624836	2.68023e-10	189.827	0.68947	0.358044	0.00298356	175.178	0.548438	5.92627e-06	171.882	0.354894	0.00175555	179.085	0.420459
CGI_10009735	0.698702	0.584868	0.442683	0.575418	hypothetical protein CGI_10009735	0.7295		0.884583	1.86183e-09	157.471	0.5013	7.51466e-06	182.062	0.710224	5.39571e-07	168.285	0.698702	0.771125	1.09177e-06	145.956	0.384752	0.00257801	169.61	0.598727	8.71014e-05	156.434	0.584868	0.631709	2.61481e-06	143.989	0.238379	0.0190153	168.443	0.457962	0.000377883	154.704	0.442683
CGI_10005778	0.830495	0.4323	0.407536	0.556777	alpha-1,3-mannosyl-glyco 4-beta-N-acetylglucosaminyltransferase C [Poecilia reticulata]	0.685		0.865525	1.09473e-29	776.533	0.64092	3.85272e-16	856.585	0.985038	6.52483e-24	769.28	0.830495	0.467002	4.85864e-07	637.942	0.240179	0.0172558	711.096	0.589719	9.20981e-08	628.894	0.4323	0.442937	2.15207e-09	664.201	0.214306	0.00713527	740.667	0.565365	4.74525e-09	654.033	0.407536
CGI_10018680	0.571817	0.520345	0.568121	0.553428	L-cysteine desulfhydrase-like	0.741		0.521478	0.00603849	49.2924	0.533089	0.00238171	51.1332	0.660883	0.00143713	48.2704	0.571817	0.47109	0.0116411	46.9927	0.477965	0.00629166	48.7521	0.611981	0.00234675	46.0259	0.520345	0.51804	0.00580431	50.653	0.525	0.00268954	52.5375	0.661324	0.00118789	49.6201	0.568121
CGI_10011373	0.458417	0.581751	0.568803	0.536324	phosphatidylserine synthase 2 [Cynoglossus semilaevis]	0.7975		0.409926	0.0223469	207.538	0.474575	0.00660662	211.626	0.49075	0.00517759	206.548	0.458417	0.534207	0.000110609	212.146	0.594829	1.68703e-05	216.608	0.616217	7.74852e-06	211.595	0.581751	0.521259	0.000203246	222.319	0.581679	2.94401e-05	226.861	0.603471	1.52416e-05	221.547	0.568803
CGI_10023972	0.630645	0.512357	0.443209	0.528737	hypothetical protein CGI_10023972	0.87		0.631861	0.00260042	217.269	0.476001	0.0263916	236.821	0.784072	0.000105238	212.941	0.630645	0.515884	0.000479209	200.098	0.351379	0.0225544	218.626	0.669809	1.53896e-06	195.714	0.512357	0.446938	0.000946581	204.366	0.281177	0.0456123	223.532	0.601511	2.0317e-06	199.472	0.443209
CGI_10005303	0.422664	0.608403	0.518582	0.51655	G patch domain-containing 1	0.6495		0.224794	0.000641331	8512.65	0.429529	3.34998e-10	8315.31	0.61367	9.99351e-33	7738.62	0.422664	0.411042	4.44435e-09	8907.33	0.612317	4.29806e-17	8740.04	0.80185	1.06404e-43	8172.56	0.608403	0.322164	0.000296356	9059.48	0.522394	2.63665e-09	8866.93	0.711187	6.97315e-21	8272.89	0.518582
CGI_10023759	0.556461	0.577564	0.399887	0.511304	exosome complex component RRP45-like	0.787		0.472609	0.000195432	186.052	0.517811	2.59427e-05	191.002	0.678963	7.00303e-09	179.294	0.556461	0.494214	8.61995e-05	182.724	0.536091	1.23991e-05	187.623	0.702386	1.77599e-09	176.348	0.577564	0.316845	0.0217101	179.163	0.358364	0.00708234	183.725	0.524452	2.33936e-05	172.013	0.399887
CGI_10008498	0.534882	0.642277	0.353441	0.5102	DNA primase small subunit	0.771		0.437784	0.0295086	154.454	0.630003	0.00139709	151.759	0.53686	0.00361339	153.034	0.534882	0.545919	6.19863e-05	156.567	0.733981	2.89121e-07	154.233	0.646931	1.09638e-07	155.458	0.642277	0.257737	0.0499257	146.626	0.446064	0.00110757	143.397	0.356524	0.0015922	144.967	0.353441
CGI_10015798	0.547256	0.457169	0.509997	0.504807	collagen alpha chain CG42342-like isoform X1 [Bombyx mori]	0.6675		0.479078	0.00690479	745.77	0.499921	0.00334452	771.736	0.662769	0.000160123	722.109	0.547256	0.388803	0.00116712	697.579	0.405745	0.000271246	721.707	0.57696	3.3726e-06	674.5	0.457169	0.442345	0.0057677	752.103	0.459231	0.00270595	778.049	0.628413	9.01311e-05	727.804	0.509997
CGI_10027523	0.378325	0.523837	0.611248	0.50447	hypothetical protein CGI_10027523	0.5717		0.473847	0.0229469	546.705	0.384046	0.00473375	586.68	0.277083	0.0202188	594.974	0.378325	0.616291	0.00127866	565.926	0.528007	4.73434e-06	606.196	0.427212	5.23807e-06	614.132	0.523837	0.70145	0.00095132	620.922	0.615898	5.83779e-05	664.203	0.516396	0.000227143	671.786	0.611248
CGI_10020307	0.54493	0.447928	0.497741	0.496866	translocon-associated subunit delta-like	0.771		0.691126	3.64517e-09	561.455	0.572927	5.41745e-07	603.347	0.370737	0.00170031	628.068	0.54493	0.595773	3.71856e-11	523.702	0.472724	8.54996e-08	563.7	0.275287	0.00266802	588.595	0.447928	0.646236	3.12991e-14	563.135	0.52229	3.22389e-10	605.513	0.324697	0.000110366	631.255	0.497741
CGI_10023992	0.507097	0.441191	0.402357	0.450215	8-oxo-dGDP phosphatase NUDT18-like	0.5685		0.417465	0.000786843	111.106	0.458211	0.000124547	114.386	0.645615	1.59991e-08	106.218	0.507097	0.352602	0.0225586	105.365	0.389209	0.00832928	108.444	0.581763	1.79338e-05	100.613	0.441191	0.314105	0.0365322	109.379	0.350126	0.0152889	112.547	0.542838	4.70433e-05	104.3	0.402357
CGI_10028147	0.431717	0.481605	0.433229	0.44885	delta-1-pyrroline-5-carboxylate synthase-like isoform X2	0.807		0.502619	9.29021e-05	1376.13	0.514871	4.02283e-05	1426.73	0.277662	0.0235018	1504	0.431717	0.553333	1.92168e-10	1365.31	0.562385	5.10697e-11	1415.92	0.329097	1.20449e-06	1491.55	0.481605	0.504704	8.65095e-05	1411.84	0.513212	4.47988e-05	1463.48	0.281771	0.0192878	1542.97	0.433229
CGI_10028623	0.315586	0.462922	0.402296	0.393601	rogdi-like isoform X2	0.5895		0.29709	4.06806e-05	914.964	0.243152	0.00359445	967.977	0.406517	8.43448e-05	901.747	0.315586	0.444608	1.54487e-05	945.196	0.388707	0.000401392	999.099	0.555451	6.76827e-06	934.317	0.462922	0.384095	0.00335328	972.252	0.328161	0.0160662	1027.68	0.494632	0.000620816	959.445	0.402296
CGI_10012578	0.336966	0.335013	0.375632	0.349204	Ubiquitinconjugating enzyme subfamily [Acanthamoeba castellanii Neff]	0.5515		0.23754	9.29457e-05	2099.06	0.543906	8.04383e-14	1990.79	0.229451	0.00890555	2146.67	0.336966	0.235482	4.60459e-07	2041.89	0.539447	5.69145e-17	1936.56	0.230111	0.0036478	2089.65	0.335013	0.276724	2.61366e-09	2183.29	0.579758	5.76178e-19	2073.14	0.270414	0.00052525	2232.96	0.375632
CGI_10017707	0.25064	0.427052	0.312753	0.330148	TLD domain-containing 1	0.5875		0.239824	0.0396175	147.189	0.295989	0.0127347	150.572	0.216106	0.042922	151.414	0.25064	0.416531	0.000686755	153.729	0.468901	0.000203672	157.462	0.395724	0.000350438	158.173	0.427052	0.302484	0.00769699	154.58	0.354983	0.00248405	158.166	0.280791	0.00601638	158.991	0.312753
CGI_10000866	0.358813	0.204015	0.382793	0.315207	THAP domain-containing 4-like	1		0.298405	3.28543e-09	2317.51	0.399008	9.74571e-13	2337.83	0.379027	2.0454e-18	2306.67	0.358813	0.143644	0.028591	2129.36	0.241642	0.000276696	2144.2	0.226758	4.82186e-05	2117.77	0.204015	0.323045	0.000126093	2399.7	0.420028	6.2445e-07	2420.64	0.405306	1.71675e-07	2389.1	0.382793
CGI_10026543	0.239227	0.256754	0.370067	0.288683	membrane progestin receptor gamma-B-like	0.8025		0.261876	0.0031087	470.594	0.188417	0.0160533	501.285	0.267388	0.00218049	479.109	0.239227	0.279245	0.00219164	460.921	0.20372	0.0134944	491.013	0.287297	0.00125922	469.603	0.256754	0.392224	0.00377723	508.349	0.317318	0.0137919	540.688	0.400659	0.0023212	517.571	0.370067
CGI_10018240	0.250609	0.266715	0.312821	0.276715	receptor expression-enhancing 5-like isoform X1	0.76		0.291862	5.58065e-06	983.343	0.303964	1.07885e-07	1019.36	0.156002	0.0238651	1047.99	0.250609	0.30784	3.91844e-06	962.845	0.31751	1.00386e-07	998.232	0.174796	0.013103	1026.58	0.266715	0.354285	9.36224e-05	1032.95	0.363149	1.92302e-05	1070.6	0.221029	0.0176518	1099.66	0.312821
CGI_10018660	0.186053	0.225984	0.387777	0.266605	lysosomal acid lipase cholesteryl ester hydrolase-like [Lingula anatina]	0.744		0.206726	5.48275e-05	1049.48	0.126842	0.0321539	1120.61	0.224592	0.000528079	1064.15	0.186053	0.246342	0.00033667	1037.51	0.164375	0.0317627	1107.55	0.267233	0.000691057	1052.86	0.225984	0.40838	0.000181007	1164.42	0.326479	0.00351281	1240.53	0.428473	0.000146816	1181.26	0.387777
CGI_10014689	0.224262	0.257403	0.314065	0.265243	caspase-7-like isoform X1 [Crassostrea gigas]	0.658		0.226182	0.00573272	330.362	0.190307	0.0327636	347.679	0.256297	0.00194618	333.922	0.224262	0.259361	0.00900319	326.051	0.221149	0.0363447	343.099	0.291699	0.00284108	329.822	0.257403	0.316602	0.000125206	350.438	0.277197	0.00151087	368.544	0.348395	2.007e-05	354.294	0.314065
CGI_10024246	0.250603	0.16571	0.252417	0.22291	septin-2-like isoform X1 [Lingula anatina]	0.815		0.273725	0.000239101	870.337	0.240895	0.00089739	915.294	0.23719	0.00121345	898.546	0.250603	0.188965	0.0129545	820.423	0.153366	0.0391401	863.181	0.1548	0.0354736	847.842	0.16571	0.276058	6.50972e-05	892.508	0.239869	0.000283588	938.364	0.241326	0.000258476	921.381	0.252417
CGI_10024516	0.21224	0.177657	0.202504	0.197467	Zinc finger CCHC domain-containing 8	0.4655		0.209784	0.00106934	700.007	0.2057	0.000480872	729.174	0.221237	0.000121433	711.386	0.21224	0.17497	0.0353382	672.742	0.168542	0.0306623	700.861	0.189458	0.0115087	684.095	0.177657	0.200624	0.00157453	714.926	0.19308	0.000954407	744.586	0.213807	0.000148297	726.55	0.202504
CGI_10027235	-0.243251	-0.283422	-0.225716	-0.250796	Anaphase-promoting complex subunit 4	0.6235		-0.217442	1.09617e-05	1881.87	-0.261402	0.000324729	1992.13	-0.250909	9.04432e-08	1945.07	-0.243251	-0.257535	9.758e-06	1808.44	-0.304005	8.48292e-05	1915.27	-0.288728	8.81601e-08	1870.33	-0.283422	-0.199266	0.000131663	1939.73	-0.246832	0.000961335	2053.23	-0.231049	2.58137e-06	2004.58	-0.225716
CGI_10026049	-0.295877	-0.267816	-0.222465	-0.262053	C12orf4 homolog [Crassostrea gigas]	0.7375		-0.230071	0.000533837	659.023	-0.254917	0.00124162	692.433	-0.402641	1.20325e-10	718.927	-0.295877	-0.202191	0.00606211	647.344	-0.229535	0.00705562	680.274	-0.371723	4.48387e-08	706.155	-0.267816	-0.156014	0.0158048	691.723	-0.184603	0.0180967	726.625	-0.326777	3.49783e-08	753.393	-0.222465
CGI_10027480	-0.292142	-0.333195	-0.213781	-0.279706	RNA-binding PNO1	0.875		-0.349194	0.00293768	5767.01	-0.224759	0.0385433	5718.4	-0.302474	0.0032974	5776.48	-0.292142	-0.38997	0.000154602	5545.29	-0.268544	0.00247404	5495.92	-0.341071	5.73735e-05	5555.58	-0.333195	-0.270661	0.000856205	6061.69	-0.148809	0.00684313	6016.83	-0.221872	5.41655e-06	6073.12	-0.213781
CGI_10027080	-0.324283	-0.311352	-0.258967	-0.298201	uncharacterized transcriptional regulatory TBS1-like	0.6815		-0.328159	3.35911e-06	940.591	-0.35359	5.96525e-12	988.379	-0.291101	1.60459e-05	946.351	-0.324283	-0.314857	0.00174405	918.782	-0.343122	5.75941e-05	965.711	-0.276079	0.00424648	924.824	-0.311352	-0.262213	0.00160969	983.721	-0.291	7.90936e-06	1033.53	-0.223688	0.00494431	989.918	-0.258967
CGI_10011713	-0.366303	-0.464722	-0.249053	-0.360026	nuclear hormone receptor HR3	0.6805		-0.384776	6.59767e-07	272.837	-0.331063	0.000262044	277.838	-0.383069	0.000395233	278.31	-0.366303	-0.484279	0.000392866	257.658	-0.432167	0.00297868	262.286	-0.47772	0.00211128	262.932	-0.464722	-0.266574	0.000732746	289.991	-0.216563	0.0214292	295.535	-0.264021	0.0173681	295.798	-0.249053
CGI_10003342	-0.42242	-0.344531	-0.337283	-0.368078	GTP cyclohydrolase 1-like	0.7775		-0.32822	0.00331406	290.442	-0.630813	1.30023e-09	342.019	-0.308227	0.00259262	294.035	-0.42242	-0.250512	0.0179098	289.845	-0.555412	6.87332e-09	340.465	-0.227668	0.0167863	293.645	-0.344531	-0.242615	0.0167722	305.853	-0.548885	3.41562e-09	359.075	-0.220348	0.0140968	309.645	-0.337283
CGI_10015208	-0.540928	-0.321563	-0.333802	-0.398764	Aldo-keto reductase family 1 member B10	0.7085		-0.667737	1.05219e-07	591.159	-0.52431	7.4455e-06	578.172	-0.430738	6.4365e-06	545.069	-0.540928	-0.449194	0.000177666	612.597	-0.307206	0.00639814	601.629	-0.208288	0.0171347	568.814	-0.321563	-0.461495	8.97921e-05	642.496	-0.319993	0.00337908	630.713	-0.219918	0.00875546	596.03	-0.333802
CGI_10008887	-0.343102	-0.515074	-0.349876	-0.402684	solute carrier family 15 member 4-like	0.661		-0.398954	1.16443e-05	2931.77	-0.357241	1.99192e-06	2999.02	-0.27311	0.00408304	2847.52	-0.343102	-0.570913	1.13694e-14	2715.71	-0.532445	3.33002e-23	2776.69	-0.441863	5.59635e-09	2632.24	-0.515074	-0.405284	1.34427e-06	2999.09	-0.36691	3.40471e-08	3068.15	-0.277435	0.00150536	2912.53	-0.349876
CGI_10018667	-0.344126	-0.397542	-0.46857	-0.403413	golgin subfamily A member 6 22 isoform X1 [Crassostrea gigas]	0.99		-0.354493	0.00589544	250.57	-0.399723	0.00341252	265.382	-0.278161	0.035229	248.056	-0.344126	-0.408292	0.00175077	239.736	-0.455441	0.000949748	254.07	-0.328895	0.012936	237.335	-0.397542	-0.478331	0.0001738	247.095	-0.526804	8.93975e-05	261.904	-0.400575	0.00174527	244.305	-0.46857
CGI_10023355	-0.481731	-0.466932	-0.297566	-0.41541	transforming growth factor-beta-induced ig-h3-like [Crassostrea gigas]	0.578		-0.481209	0.00085438	1383.65	-0.544329	0.000116156	1477.57	-0.419656	3.06412e-05	1373.65	-0.481731	-0.466685	0.000210488	1353.47	-0.531707	1.82112e-05	1445.72	-0.402402	6.86293e-09	1344.68	-0.466932	-0.29744	0.0289671	1500.33	-0.363669	0.00594677	1600.14	-0.231589	0.00385333	1491.83	-0.297566
CGI_10019152	-0.403591	-0.54358	-0.3271	-0.424757	HAUS augmin-like complex subunit 8	0.6105		-0.619553	1.24369e-16	557.543	-0.303334	0.00079206	510.696	-0.287887	0.000617992	497.848	-0.403591	-0.759721	3.59362e-28	522.77	-0.44582	3.94916e-08	476.474	-0.425199	1.32572e-08	464.454	-0.54358	-0.542108	3.30796e-12	583.908	-0.229898	0.0142268	536.328	-0.209294	0.0168602	522.89	-0.3271
CGI_10023280	-0.400427	-0.360375	-0.55544	-0.438747	transmembrane emp24 domain-containing 5-like	0.639		-0.364948	0.00925825	126.834	-0.469764	0.000898833	137.703	-0.366569	0.00406388	129.339	-0.400427	-0.325555	0.0317295	124.944	-0.431826	0.00414716	135.628	-0.323743	0.019717	127.497	-0.360375	-0.519231	1.30957e-05	124.272	-0.626952	3.79838e-07	135.204	-0.520138	1.919e-06	126.719	-0.55544
CGI_10003919	-0.408203	-0.442205	-0.470002	-0.440137	tetratricopeptide repeat 30A-like	0.926		-0.244484	0.00259801	1135.15	-0.338284	5.58998e-05	1224.86	-0.641841	4.70689e-17	1359.43	-0.408203	-0.278525	0.000231568	1093.25	-0.374998	1.49603e-06	1180.35	-0.673093	6.92166e-21	1311.84	-0.442205	-0.305378	3.27645e-12	1141.7	-0.402877	5.29497e-15	1232.74	-0.701752	1.59782e-51	1370.85	-0.470002
CGI_10003634	-0.534648	-0.454342	-0.384947	-0.457979	PREDICTED: uncharacterized protein LOC105340401 [Crassostrea gigas]	0.59		-0.582208	2.0559e-08	579.363	-0.602713	2.88296e-09	608.046	-0.419023	0.00016599	552.763	-0.534648	-0.502394	2.63387e-15	577.8	-0.525042	2.23684e-18	606.461	-0.335591	2.68996e-06	552.416	-0.454342	-0.432271	3.84711e-11	620.462	-0.455669	2.45313e-13	650.973	-0.266901	0.000355486	593.658	-0.384947
CGI_10022386	-0.429962	-0.636857	-0.336261	-0.467694	Peroxisomal sarcosine oxidase	0.684		-0.456892	0.000843151	298.688	-0.353348	0.00615313	297.847	-0.479647	0.000173022	307.287	-0.429962	-0.663729	3.39352e-10	274.495	-0.562786	1.90361e-09	273.118	-0.684057	1.94212e-12	282.68	-0.636857	-0.363065	0.0031153	314.953	-0.261947	0.0227965	314.489	-0.383772	0.000728086	323.961	-0.336261
CGI_10016346	-0.574755	-0.401141	-0.439779	-0.471892	hypothetical protein CGI_10016346	0.8133		-0.486928	0.013227	105.789	-0.647555	0.00111684	118.168	-0.589782	0.00178664	112.832	-0.574755	-0.313668	0.015953	108.902	-0.477317	0.000534033	121.217	-0.412439	0.000836519	115.924	-0.401141	-0.351416	0.014003	113.309	-0.515782	0.000687764	126.209	-0.452138	0.00094177	120.606	-0.439779
CGI_10020757	-0.401603	-0.442218	-0.59015	-0.47799	sodium-coupled monocarboxylate transporter 1-like	0.705		-0.473249	0.00274064	487.407	-0.42757	0.00314597	497.152	-0.303988	0.023871	463.788	-0.401603	-0.514542	0.000295001	468.861	-0.470588	0.000235103	478.313	-0.341525	0.00264767	446.068	-0.442218	-0.66043	1.8907e-06	473.791	-0.619026	5.45423e-07	482.843	-0.490993	4.94922e-06	449.069	-0.59015
CGI_10009325	-0.561749	-0.527324	-0.379129	-0.489401	Mpv17-like [Crassostrea gigas]	0.7035		-0.429619	0.003917	198.989	-0.453747	0.00274954	209.084	-0.801881	2.48373e-09	238.075	-0.561749	-0.396432	0.00704475	195.527	-0.421596	0.00550674	205.544	-0.763944	6.30998e-09	233.728	-0.527324	-0.245816	0.0121262	216.368	-0.271685	0.0112817	227.287	-0.619885	1.25101e-12	256.686	-0.379129
CGI_10011568	-0.643756	-0.51764	-0.308785	-0.49006	C3 and PZP-like alpha-2-macroglobulin domain-containing 8	0.684		-0.59892	6.49201e-13	428.721	-0.731764	1.26006e-13	472.868	-0.600585	2.56947e-12	437.849	-0.643756	-0.473015	0.000132558	432.249	-0.607417	3.33228e-06	475.995	-0.472488	0.000131331	441.615	-0.51764	-0.263128	0.00112327	485.549	-0.40022	3.14076e-05	532.693	-0.263006	0.00144292	495.774	-0.308785
CGI_10003346	-0.449323	-0.521079	-0.529338	-0.499913	pancreatic triacylglycerol lipase-like	0.726		-0.410241	5.15047e-05	1005.88	-0.663593	3.27879e-08	1164.82	-0.274135	0.032313	973.578	-0.449323	-0.482977	9.83407e-11	959.107	-0.737913	3.52306e-13	1113.4	-0.342346	0.000900102	927.676	-0.521079	-0.490312	4.41015e-12	1007.43	-0.746848	8.61675e-14	1169.63	-0.350854	0.000465271	973.742	-0.529338
CGI_10011588	-0.472893	-0.486704	-0.549494	-0.503031	branchpoint-bridging -like [Crassostrea gigas]	1		-0.366722	0.000319542	212.682	-0.262047	0.00399531	212.42	-0.789909	4.55135e-17	259.405	-0.472893	-0.38053	0.00403701	206.131	-0.280506	0.0219398	205.878	-0.799077	7.95263e-12	251.647	-0.486704	-0.442665	0.000131284	212.945	-0.342472	0.000987218	212.491	-0.863346	4.6174e-16	260.668	-0.549494
CGI_10013583	-0.651198	-0.476707	-0.413116	-0.513674	Tyrosine- phosphatase non-receptor type 23	0.9045		-0.917003	2.22019e-08	305.703	-0.510537	3.90253e-05	264.196	-0.526054	1.46471e-05	260.754	-0.651198	-0.746299	3.73387e-07	310.981	-0.336901	0.000582974	271.187	-0.346922	0.000217747	267.63	-0.476707	-0.682052	1.02133e-05	333.096	-0.273519	0.0133669	291.319	-0.283777	0.00714645	287.346	-0.413116
CGI_10016312	-0.529764	-0.407181	-0.626603	-0.521183	Serine-threonine kinase receptor-associated	0.827		-0.443517	0.000328464	1084	-0.515073	4.36329e-13	1158.49	-0.630703	2.26402e-12	1193.92	-0.529764	-0.322466	0.0293307	1094.09	-0.394277	9.3913e-05	1168.56	-0.504799	8.40505e-06	1202.53	-0.407181	-0.539304	7.70336e-05	1079.26	-0.614959	4.16513e-11	1154.46	-0.725547	1.01448e-11	1190.98	-0.626603
CGI_10003564	-0.464189	-0.430127	-0.67305	-0.522455	cathepsin L1-like [Crassostrea gigas]	0.8145		-0.328564	0.028775	23249.3	-0.705031	1.46038e-06	28326.1	-0.35897	0.0131473	23996	-0.464189	-0.295228	0.036917	22873.6	-0.673293	9.99685e-07	27838.7	-0.32186	0.0185003	23623.4	-0.430127	-0.53697	3.69116e-05	22386	-0.916343	9.56862e-12	27541.5	-0.565838	8.15303e-06	23123.4	-0.67305
CGI_10005384	-0.644923	-0.510639	-0.423139	-0.526234	synaptobrevin homolog YKT6	0.828		-0.521809	0.000536768	100.791	-0.698533	1.29017e-06	113.206	-0.714428	8.99747e-06	111.948	-0.644923	-0.389001	0.0174195	102.291	-0.566506	0.000211188	114.591	-0.576409	0.000582929	113.275	-0.510639	-0.29928	0.0199273	110.647	-0.478664	7.52568e-05	123.687	-0.491473	0.000373458	122.209	-0.423139
CGI_10017012	-0.478987	-0.707223	-0.504877	-0.563696	UPF0696 C11orf68 homolog [Astyanax mexicanus]	0.63		-0.42947	0.000241424	136.067	-0.342149	0.0044347	136.77	-0.665343	2.21546e-09	153.296	-0.478987	-0.658284	4.63469e-07	123.9	-0.573786	1.46535e-05	124.292	-0.889598	1.54921e-12	140.565	-0.707223	-0.454877	8.64885e-05	138.497	-0.370874	0.0017782	139.184	-0.688879	4.02767e-10	156.109	-0.504877
CGI_10028808	-0.846217	-0.463161	-0.383248	-0.564208	Arylacetamide deacetylase	0.581		-0.700501	2.65631e-07	587.132	-0.948341	1.3244e-14	682.494	-0.889809	3.15264e-13	651.356	-0.846217	-0.317913	0.00466202	639.771	-0.567926	6.61246e-10	735.672	-0.503643	2.95828e-08	704.038	-0.463161	-0.237494	0.0123838	691.008	-0.488575	1.85958e-11	792.468	-0.423674	2.02031e-09	758.587	-0.383248
CGI_10014654	-0.625625	-0.511524	-0.581825	-0.572991	proteoglycan 4-like [Crassostrea gigas]	0.5905		-0.501174	4.69927e-10	542.903	-0.62255	5.16852e-09	594.703	-0.753149	5.37733e-16	616.682	-0.625625	-0.390346	0.0255085	544.467	-0.51099	0.00461843	595.814	-0.633237	0.000152938	616.916	-0.511524	-0.459709	0.0194531	560.661	-0.581965	0.00339916	613.999	-0.703801	0.000190726	636.216	-0.581825
CGI_10016692	-0.238817	-0.749628	-0.731262	-0.573236	ADAM family mig-17	0.596		-0.288451	0.00162274	922.499	-0.199346	0.0347677	928.46	-0.228654	0.00163993	919.971	-0.238817	-0.798176	5.3941e-17	776.407	-0.712327	3.19465e-14	777.542	-0.738381	2.02241e-21	771.702	-0.749628	-0.778678	6.749e-11	820.474	-0.695009	5.35147e-09	821.759	-0.720099	2.52285e-11	815.28	-0.731262
CGI_10012766	-0.525435	-0.534929	-0.768223	-0.609529	PREDICTED: uncharacterized protein LOC105349008	0.65		-0.381097	0.0111764	167.81	-0.602085	9.99937e-07	190.954	-0.593124	2.69939e-09	186.307	-0.525435	-0.391646	0.0232197	162.712	-0.61298	2.07756e-05	185.278	-0.60016	1.29914e-06	180.788	-0.534929	-0.62239	3.27904e-06	160.195	-0.848324	2.64935e-14	183.465	-0.833955	2.40307e-20	178.876	-0.768223
CGI_10020308	-0.642971	-0.491323	-0.698123	-0.610806	Metabotropic glutamate receptor 2	0.5525		-0.696628	2.49662e-12	394.461	-0.707206	3.39667e-21	411.822	-0.525079	2.6214e-10	373.962	-0.642971	-0.54518	1.76575e-07	400.289	-0.557796	2.16693e-12	418.003	-0.370993	2.88811e-05	380.836	-0.491323	-0.751337	2.63003e-15	398.466	-0.765047	1.42974e-27	416.136	-0.577985	8.85116e-14	377.29	-0.698123
CGI_10002232	-0.628374	-0.66578	-0.552036	-0.615397	E3 ubiquitin- ligase Praja- partial	0.594		-0.770112	8.98514e-11	207.538	-0.406245	0.00110988	185.109	-0.708767	3.94734e-08	206.198	-0.628374	-0.808385	1.36729e-16	200.08	-0.444507	1.04438e-05	178.219	-0.744447	4.97948e-12	198.797	-0.66578	-0.692622	6.68596e-09	216.824	-0.332467	0.00827032	193.988	-0.631018	8.9233e-07	215.465	-0.552036
CGI_10001563	-0.75261	-0.550481	-0.552286	-0.618459	leukocyte elastase inhibitor-like	0.682		-0.551889	4.51634e-05	169.721	-0.878357	2.27102e-13	203.608	-0.827583	6.28329e-11	195.109	-0.75261	-0.351299	0.0193049	175.24	-0.677755	8.86978e-08	208.704	-0.622387	3.42446e-06	200.235	-0.550481	-0.349443	0.000393872	184.835	-0.68044	7.88212e-16	220.045	-0.626975	5.88429e-12	211.046	-0.552286
CGI_10007658	-0.298781	-0.831856	-0.79384	-0.641492	c-binding -like	0.6815		-0.191718	0.0413743	20072.1	-0.238323	0.000449135	21249.2	-0.466302	2.60554e-17	22772.4	-0.298781	-0.723336	2.63036e-18	16705.7	-0.77457	2.01106e-34	17744.6	-0.997663	4.60451e-73	19283.6	-0.831856	-0.685047	1.4742e-12	17761	-0.736886	2.52665e-20	18855.8	-0.959586	2.41549e-39	20465.7	-0.79384
CGI_10022013	-0.627179	-0.641984	-0.678235	-0.649133	solute carrier family 13 member 5-like	0.6835		-0.511639	0.0104337	568.966	-0.582275	0.00276895	610.108	-0.787622	5.10017e-05	656.638	-0.627179	-0.525466	0.000237033	553.146	-0.598757	1.76993e-05	593.311	-0.80173	3.06862e-08	638.597	-0.641984	-0.559922	2.93011e-06	577.142	-0.634852	5.9453e-08	619.047	-0.839931	3.0739e-11	666.596	-0.678235
CGI_10004827	-0.8392	-0.547786	-0.585252	-0.657413	Violaxanthin de-epoxidase	0.475		-0.707008	4.30327e-06	573.587	-0.922502	5.8239e-27	653.329	-0.888088	2.74008e-25	630.454	-0.8392	-0.420702	0.0330453	605.004	-0.63104	3.87148e-06	684.746	-0.591617	1.50079e-05	661.512	-0.547786	-0.455687	0.0076856	630.808	-0.669745	1.06703e-10	714.493	-0.630325	1.20061e-09	689.921	-0.585252
CGI_10004447	-0.509859	-0.945859	-0.575059	-0.676926	[Nematostella vectensis]	0.7125		-0.688679	8.77299e-06	154.098	-0.397516	0.015878	141.6	-0.443382	0.00216038	141.158	-0.509859	-1.124	6.38231e-14	134.714	-0.834963	5.70855e-08	121.997	-0.878616	1.28008e-10	121.852	-0.945859	-0.750992	2.72624e-05	154.939	-0.466975	0.0130132	142.03	-0.507208	0.00288746	141.606	-0.575059
CGI_10013797	-0.4658	-0.896702	-0.741801	-0.701434	Williams-Beuren syndrome chromosomal region 27 -like	0.6805		-0.519734	0.00979509	2163.73	-0.453845	0.0138895	2185.9	-0.423821	0.0256774	2116.62	-0.4658	-0.949825	6.39795e-13	1885.51	-0.888648	9.23447e-18	1898.76	-0.851632	1.01917e-14	1835.85	-0.896702	-0.793719	8.30411e-06	2056.41	-0.733667	3.65431e-06	2072.96	-0.698016	2.0117e-05	2004.91	-0.741801
CGI_10017314	-0.873109	-0.648609	-0.631585	-0.717767	membrane frizzled-related -like [Crassostrea gigas]	0.5105		-0.659163	4.85157e-16	1846	-1.14795	8.04704e-31	2405.91	-0.812216	3.1486e-19	2015.42	-0.873109	-0.437478	0.00264999	1909.21	-0.922577	1.32956e-10	2459.72	-0.585773	4.98293e-05	2077.41	-0.648609	-0.416682	5.36055e-06	2026.17	-0.909282	2.32369e-18	2605.88	-0.56879	5.94876e-09	2202.12	-0.631585
CGI_10005742	-0.694162	-0.716346	-0.80105	-0.737186	hypothetical protein CGI_10005742	0.6008		-0.614482	5.95684e-12	434.771	-0.529409	2.60543e-05	437.363	-0.938594	2.72311e-11	515.322	-0.694162	-0.638297	3.67997e-10	420.447	-0.554797	3.41752e-05	422.981	-0.955946	5.46721e-11	498.917	-0.716346	-0.721306	6.01561e-08	431.716	-0.641057	4.40762e-05	433.868	-1.04079	4.17906e-10	513.886	-0.80105
CGI_10023150	-0.602508	-0.918998	-0.717159	-0.746222	zinc metallo ase nas-15-like	0.551		-0.716066	0.00914305	4991.37	-0.526978	0.00360381	4702.08	-0.56448	0.00191338	4687.15	-0.602508	-1.02088	2.2346e-05	4499.79	-0.851764	5.6493e-11	4204.86	-0.88435	2.18025e-11	4196.65	-0.918998	-0.824863	0.00112243	4973.18	-0.64679	5.22136e-06	4670.69	-0.679825	2.41843e-06	4656.16	-0.717159
CGI_10005285	-0.999606	-1.01598	-0.286561	-0.767382	Caspase- partial	0.4865		-0.958642	1.28213e-27	231.46	-1.04873	1.09944e-30	250.789	-0.991446	1.89899e-32	239.477	-0.999606	-0.976555	2.16033e-13	223.736	-1.06564	1.18689e-15	242.628	-1.00574	2.49188e-15	231.572	-1.01598	-0.24498	0.0027234	289.279	-0.339264	4.8324e-05	311.237	-0.275438	0.000279225	298.532	-0.286561
CGI_10003546	-0.588162	-1.04766	-0.687617	-0.774479	lachesin- partial	0.6775		-1.02528	2.49306e-11	270.122	-0.497466	1.20439e-06	220.714	-0.241743	0.031195	195.516	-0.588162	-1.47569	1.0591e-20	239.116	-0.963478	5.62445e-18	190.168	-0.703812	6.70327e-10	166.084	-1.04766	-1.12107	2.19972e-13	270.873	-0.601136	1.77619e-09	219.998	-0.340645	0.00117152	194.243	-0.687617
CGI_10003892	-0.745677	-0.789686	-0.876257	-0.803873	probable cytochrome P450 49a1	0.6575		-0.786821	1.2239e-19	615.683	-0.843382	3.06752e-22	656.712	-0.606827	6.99589e-18	580.428	-0.745677	-0.830832	1.06707e-23	592.794	-0.889399	1.05372e-26	632.793	-0.648827	3.31245e-23	558.579	-0.789686	-0.916452	4.33201e-23	610.935	-0.976077	4.48698e-26	652.354	-0.736243	2.66914e-21	574.305	-0.876257
CGI_10014388	-0.580096	-1.12573	-0.743544	-0.816455	B(0,+)-type amino acid transporter 1	0.8375		-0.828969	1.09065e-16	196.425	-0.259823	0.0437305	161.081	-0.651495	6.51968e-07	185.723	-0.580096	-1.37588	5.94295e-25	168.881	-0.811458	8.45898e-08	133.641	-1.18984	4.11692e-14	158.073	-1.12573	-0.992495	3.0685e-28	193.54	-0.426025	0.000120986	157.025	-0.812113	1.18352e-11	182.377	-0.743544
CGI_10024979	-1.07498	-0.762456	-0.6171	-0.818177	hypothetical protein CGI_10024979	1		-0.914479	1.22428e-06	60.0811	-0.922934	7.66871e-08	62.2674	-1.38752	3.59594e-14	77.4994	-1.07498	-0.604721	0.00151423	63.4942	-0.611538	0.000443859	65.8615	-1.07111	2.29201e-09	80.5853	-0.762456	-0.456838	0.0136867	69.833	-0.464625	0.00537945	72.4142	-0.929836	7.37292e-08	87.8334	-0.6171
CGI_10014128	-1.02324	-0.576999	-0.865291	-0.821845	Alkaline tissue-nonspecific isozyme	0.72		-0.703978	5.99855e-08	150.868	-0.88671	4.31619e-10	170.59	-1.47905	6.68545e-20	225.53	-1.02324	-0.253964	0.0289919	167.642	-0.441995	0.000428001	187.742	-1.03504	9.55779e-13	240.811	-0.576999	-0.545815	0.000127478	161.436	-0.731986	1.1748e-06	181.957	-1.31807	3.95582e-15	238.051	-0.865291
CGI_10010214	-0.701239	-0.781771	-0.982634	-0.821881	Voltage-gated hydrogen channel 1	0.588		-0.62923	2.0216e-06	182.027	-0.796357	6.21218e-09	203.78	-0.67813	3.5829e-08	189.374	-0.701239	-0.710487	4.96814e-08	173.478	-0.878055	7.99822e-11	194.602	-0.75677	3.76714e-10	180.623	-0.781771	-0.910212	3.50299e-07	172.77	-1.07843	1.42663e-09	194.584	-0.959263	1.76789e-08	179.996	-0.982634
CGI_10021805	-0.949971	-0.926489	-0.625071	-0.833844	serine threonine- phosphatase 6 regulatory ankyrin repeat subunit B-like	0.659		-1.491	2.07825e-52	323.656	-0.772843	8.40945e-15	238.101	-0.586072	7.87131e-08	215.161	-0.949971	-1.46777	1.59949e-53	316.27	-0.751612	8.90549e-15	233.139	-0.560083	1.49497e-07	210.782	-0.926489	-1.16494	2.3667e-31	353.94	-0.450873	1.84255e-05	267.181	-0.2594	0.0312043	243.2	-0.625071
CGI_10009110	-0.649716	-1.14077	-0.854789	-0.88176	DUF4434 domain-containing	0.536		-0.465717	0.00128062	715.548	-0.971486	3.25673e-16	928.882	-0.511944	8.43483e-06	742.791	-0.649716	-0.958119	3.96126e-08	608.338	-1.45972	1.37593e-20	812.958	-1.00449	8.40861e-11	633.293	-1.14077	-0.668744	7.91383e-08	692.592	-1.18024	1.0166e-30	909.97	-0.715387	2.10071e-14	719.672	-0.854789
CGI_10004611	-1.26344	-0.694107	-0.698456	-0.885333	HAUS augmin-like complex subunit 3	0.5945		-1.43425	7.12612e-42	312.441	-0.95585	5.85513e-27	256.225	-1.40021	5.38319e-50	312.363	-1.26344	-0.866466	4.42621e-15	343.888	-0.388413	9.86111e-05	290.882	-0.827441	6.18834e-17	344.756	-0.694107	-0.869941	1.42202e-14	361.82	-0.392992	0.000123475	305.928	-0.832435	2.29569e-16	362.509	-0.698456
CGI_10015908	-0.826557	-0.881635	-0.961311	-0.889834	hypothetical protein CGI_10015908	0.838		-0.535361	7.00097e-06	181.433	-0.603663	0.00014188	194.573	-1.34065	5.11277e-21	270.149	-0.826557	-0.593538	7.55298e-07	173.752	-0.661245	2.91663e-05	186.491	-1.39012	1.85987e-22	260.12	-0.881635	-0.670037	2.3544e-11	179.232	-0.740017	2.19948e-07	192.456	-1.47388	3.51446e-29	269.956	-0.961311
CGI_10024095	-1.23121	-0.669244	-0.81474	-0.905063	3-demethylubiquinone-9 3-methyltransferase [Crassostrea gigas]	0.689		-0.979201	2.48891e-15	277.67	-1.25608	1.64851e-35	328.833	-1.45833	3.30498e-36	358.686	-1.23121	-0.419379	0.000635844	313.947	-0.69439	1.51154e-13	365.694	-0.893964	2.24247e-16	393.843	-0.669244	-0.564694	7.22352e-05	316.667	-0.840467	1.2898e-12	370.536	-1.03906	1.08218e-15	400.266	-0.81474
CGI_10012584	-0.873122	-0.975878	-0.879092	-0.909364	monocarboxylate transporter 13-like	0.5325		-1.01262	1.17479e-05	102.403	-0.913881	4.51743e-05	101.177	-0.692863	0.000523721	88.9088	-0.873122	-1.11517	3.19866e-07	97.4448	-1.0163	1.3113e-06	96.1927	-0.79616	1.28082e-05	84.2818	-0.975878	-1.01974	8.66977e-07	104.957	-0.922154	3.16703e-06	103.715	-0.695379	2.90397e-05	91.0992	-0.879092
CGI_10028460	-0.721277	-0.823861	-1.23161	-0.925583	hypothetical protein CGI_10028460	0.757		-0.590814	4.20497e-12	764.988	-0.480551	2.74726e-06	760.939	-1.09247	8.28018e-44	977.266	-0.721277	-0.694267	9.07534e-12	723.27	-0.586531	3.9441e-07	718.733	-1.19078	1.05391e-36	929.696	-0.823861	-1.10121	6.99465e-28	689.547	-0.993376	2.90227e-18	681.893	-1.60024	7.08091e-63	904.968	-1.23161
CGI_10002477	-0.968362	-0.995142	-0.81827	-0.927258	Arrestin domain-containing 2	0.8655		-1.38158	2.02473e-13	40.6594	-0.688744	0.00183895	30.1685	-0.834767	0.000128191	31.6666	-0.968362	-1.39964	2.06447e-09	39.156	-0.724889	0.00812041	28.933	-0.860894	0.00117315	30.391	-0.995142	-1.23182	1.56785e-12	42.9992	-0.539778	0.0095454	32.3013	-0.68321	0.000716098	33.8	-0.81827
CGI_10009713	-1.17677	-0.894057	-0.766358	-0.945728	hypothetical protein CGI_10009713	0.807		-1.179	8.34342e-26	169.678	-0.880915	2.40593e-06	154.926	-1.47039	2.26639e-43	200.455	-1.17677	-0.894198	1.07398e-09	175.681	-0.608904	0.00477326	161.815	-1.17907	1.0708e-17	205.915	-0.894057	-0.764612	4.22828e-14	191.67	-0.481186	0.0101996	177.292	-1.05328	7.42922e-29	223.509	-0.766358
CGI_10021295	-1.62884	-0.481159	-0.755129	-0.955043	transmembrane 220-like isoform X1	0.5938		-1.57122	1.02341e-16	137.811	-1.57771	9.53252e-21	142.502	-1.73759	2.55882e-34	151.11	-1.62884	-0.437176	0.0439245	175.691	-0.431977	0.027441	181.984	-0.574326	0.000475038	189.54	-0.481159	-0.707843	5.9807e-06	171.626	-0.705353	4.67389e-08	177.674	-0.852192	1.33404e-18	185.796	-0.755129
CGI_10027291	-0.960071	-0.951169	-0.976031	-0.962424	probable cytochrome P450 mitochondrial	0.666		-0.755045	0.000139941	346.943	-1.34123	2.17025e-13	480.379	-0.783943	5.42773e-05	358.438	-0.960071	-0.742001	2.13122e-11	340.982	-1.34393	2.50891e-40	471.281	-0.767578	4.9732e-13	352.317	-0.951169	-0.766184	4.44663e-10	356.32	-1.36837	1.13789e-34	493.252	-0.793538	1.65916e-11	367.962	-0.976031
CGI_10024784	-1.28031	-0.804488	-0.901081	-0.995293	serine threonine- phosphatase 6 regulatory ankyrin repeat subunit C-like isoform X4 [Octopus bimaculoides]	0.563		-1.39557	1.51865e-29	317.099	-1.25083	2.18689e-19	307.366	-1.19453	8.08219e-23	291.923	-1.28031	-0.920297	7.05035e-17	342.309	-0.778443	8.70154e-10	334.313	-0.714724	4.16163e-11	318.611	-0.804488	-1.01479	3.86166e-15	351.812	-0.876055	7.66582e-10	342.966	-0.812401	1.49212e-10	326.461	-0.901081
CGI_10003239	-1.21061	-0.785263	-1.02859	-1.00816	Organic cation transporter	0.672		-0.944701	1.26482e-05	88.1943	-1.65746	2.68962e-24	130.951	-1.02967	2.6581e-11	92.518	-1.21061	-0.531193	0.0360602	95.7784	-1.22498	6.9301e-11	137.879	-0.599619	0.00207087	100.247	-0.785263	-0.766249	0.000730362	94.4591	-1.47447	8.20418e-18	138.525	-0.845066	4.86081e-07	98.9655	-1.02859
CGI_10026708	-0.966778	-1.16915	-0.917129	-1.01768	allene oxide synthase-lipoxygenase -like	0.746		-1.30182	1.13279e-20	113.28	-0.66304	1.19302e-05	86.9389	-0.935474	1.527e-09	96.7685	-0.966778	-1.50425	1.44149e-23	106.009	-0.869558	8.33373e-08	80.2408	-1.13362	5.8364e-12	89.8876	-1.16915	-1.24714	4.91494e-13	116.961	-0.619245	0.00112115	90.0167	-0.884999	2.48835e-06	100.033	-0.917129
CGI_10005499	-0.639445	-1.40577	-1.10163	-1.04895	serine threonine- phosphatase 6 regulatory ankyrin repeat subunit B-like	0.5745		-0.821783	7.23882e-08	164.6	-0.652451	3.64723e-05	158.699	-0.4441	0.0279337	142.767	-0.639445	-1.58965	1.95424e-17	135.154	-1.42404	5.89369e-14	128.482	-1.20361	3.02225e-08	113.398	-1.40577	-1.28779	9.44311e-27	152.024	-1.11908	5.22494e-19	145.365	-0.898019	5.56011e-08	129.278	-1.10163
CGI_10028341	-1.1888	-1.01879	-0.951928	-1.05317	hypothetical protein CGI_10028341	1		-0.922524	0.00100457	20.0384	-1.62707	1.58299e-11	30.1802	-1.01679	0.000107683	21.3231	-1.1888	-0.759599	0.00802607	20.3441	-1.45235	1.40317e-09	30.2741	-0.844412	0.00140537	21.6158	-1.01879	-0.688027	0.00962414	21.8877	-1.39121	5.77171e-10	32.3562	-0.776546	0.0015924	23.2271	-0.951928
CGI_10020658	-0.804359	-1.46438	-0.918732	-1.06249	hypothetical protein CGI_10020658	1		-0.463891	0.000254792	330.923	-0.513521	0.000207254	351.798	-1.43567	3.80887e-32	531.389	-0.804359	-1.12782	9.85948e-17	271.308	-1.17645	5.21797e-16	289.694	-2.08887	4.56033e-55	465.368	-1.46438	-0.579873	0.000111888	327.434	-0.632764	6.15868e-05	348.426	-1.54356	9.31436e-28	532.429	-0.918732
CGI_10019088	-2.39499	-0.454651	-0.369392	-1.07301	lactosylceramide 4-alpha-galactosyltransferase-like	0.683		-2.49306	1.39049e-70	293.554	-2.37051	1.61674e-62	283.196	-2.32141	2.77218e-67	268.567	-2.39499	-0.557578	2.04388e-06	409.369	-0.432362	0.000442164	404.439	-0.374013	0.00105975	387.729	-0.454651	-0.47217	6.11728e-06	441.916	-0.347253	0.00184448	437.105	-0.288754	0.00448805	419.204	-0.369392
CGI_10016221	-1.01846	-0.938485	-1.38836	-1.1151	PREDICTED: uncharacterized protein LOC105319526, partial	0.8		-0.907671	2.82052e-13	282.722	-1.07004	4.39458e-18	317.402	-1.07766	3.83683e-18	312.147	-1.01846	-0.828782	1.03847e-13	280.775	-0.992039	6.1437e-19	314.941	-0.994635	1.48536e-18	309.679	-0.938485	-1.27756	1.93664e-24	266.577	-1.44243	1.1673e-30	301.352	-1.44508	4.78163e-30	296.232	-1.38836
CGI_10007410	-0.988459	-1.50399	-0.857009	-1.11649	[Nematostella vectensis]	0.5975		-0.840601	2.11249e-07	311.343	-1.25027	4.08689e-37	390.711	-0.874508	1.35455e-20	320.083	-0.988459	-1.35183	4.97305e-12	268.58	-1.76702	1.34323e-31	344.659	-1.39312	2.29394e-20	276.433	-1.50399	-0.710283	0.000117577	329.489	-1.11941	1.62612e-18	411.431	-0.741339	7.28474e-09	338.654	-0.857009
CGI_10019192	-1.3926	-1.30674	-0.663033	-1.12079	3-demethylubiquinone-9 3-methyltransferase [Crassostrea gigas]	0.8573		-1.40826	5.52361e-12	76.9616	-1.48325	7.25719e-21	81.8938	-1.28631	4.12957e-14	72.6944	-1.3926	-1.32404	6.48072e-10	75.9514	-1.39856	2.12164e-16	80.8559	-1.19761	5.16333e-11	71.8474	-1.30674	-0.688715	0.000299874	93.4698	-0.750055	5.68358e-08	99.1432	-0.55033	0.000323867	89.3851	-0.663033
CGI_10002397	-1.70454	-1.08429	-0.63179	-1.14021	hypothetical protein CGI_10002397	0.7545		-1.96616	5.57344e-64	309.724	-1.50581	9.00889e-46	250.19	-1.64164	1.4062e-53	263.538	-1.70454	-1.34608	7.2568e-25	334.154	-0.888249	6.42671e-13	277.64	-1.01853	7.66473e-17	289.91	-1.08429	-0.894492	8.72208e-12	388.56	-0.435096	0.000774274	330.516	-0.565783	7.42927e-06	342.666	-0.63179
CGI_10015865	-0.927856	-1.26199	-1.27734	-1.15573	PREDICTED: uncharacterized protein LOC105332805 [Crassostrea gigas]	0.6905		-1.06521	8.74885e-05	109.318	-0.6687	0.00655098	92.4601	-1.04966	1.12509e-06	108.475	-0.927856	-1.3914	4.80921e-09	99.6113	-1.00269	3.75864e-07	82.9625	-1.39187	1.29097e-16	98.6599	-1.26199	-1.40093	3.69797e-07	103.842	-1.02645	3.82978e-05	86.2941	-1.40463	5.46434e-10	102.792	-1.27734
CGI_10005557	-1.55676	-1.43026	-0.592118	-1.19305	multidrug and toxin extrusion 2-like	0.611		-1.53622	4.94582e-16	45.5171	-1.60266	1.09715e-16	49.0803	-1.53141	2.26017e-16	46.2365	-1.55676	-1.41305	4.60738e-14	45.362	-1.47672	7.12728e-15	48.9017	-1.40101	2.66242e-14	46.0923	-1.43026	-0.572785	0.00148733	58.4346	-0.641387	0.000432553	62.5802	-0.562182	0.00144311	59.4102	-0.592118
CGI_10019752	-1.23724	-1.32057	-1.02632	-1.19471	Tubulin beta chain	0.9995		-1.19835	5.26593e-14	3743.99	-0.944193	2.84073e-14	3420.09	-1.56918	1.43309e-33	4591.53	-1.23724	-1.28485	1.10542e-06	3516.88	-1.04886	3.36899e-05	3198.49	-1.62801	2.7868e-11	4340.15	-1.32057	-0.987455	4.14822e-15	4033.69	-0.732345	7.90148e-32	3710.24	-1.35916	3.66437e-61	4905.09	-1.02632
CGI_10004691	-1.39166	-1.29205	-0.91967	-1.20113	PREDICTED: uncharacterized protein LOC105341058 [Crassostrea gigas]	0.6131		-1.34273	0.00125321	118.53	-1.32045	1.31413e-05	106.351	-1.51181	2.31278e-08	114.446	-1.39166	-1.31711	9.56273e-05	119.203	-1.18235	1.34409e-06	107.602	-1.37667	4.77964e-12	115.378	-1.29205	-0.927064	0.0241542	134.772	-0.826452	0.00432696	122.901	-1.00549	6.77084e-05	130.863	-0.91967
CGI_10001846	-1.58243	-1.40078	-0.65707	-1.21343	probable phytanoyl- dioxygenase	0.8095		-1.64346	2.26272e-58	384.031	-1.59718	1.90177e-90	387.754	-1.50665	2.72011e-51	364.176	-1.58243	-1.46293	7.60324e-36	385.203	-1.41693	6.06898e-47	389.55	-1.32248	3.11889e-30	366.242	-1.40078	-0.720027	4.97886e-11	479.463	-0.670544	1.01365e-13	486.845	-0.580638	8.20997e-08	460.788	-0.65707
CGI_10011348	-1.79728	-1.099	-0.928572	-1.27495	histone-lysine N-methyltransferase set-1	0.866		-2.25335	1.27618e-19	27.4881	-1.72279	2.19662e-08	21.4881	-1.41569	4.16083e-07	17.0763	-1.79728	-1.55108	9.1007e-11	29.6545	-1.03699	0.000788497	23.9481	-0.708936	0.0130273	19.5857	-1.099	-1.38017	6.749e-11	32.4527	-0.875825	0.00191114	26.4899	-0.529717	0.0379406	21.8658	-0.928572
CGI_10022500	-1.73257	-1.02971	-1.06838	-1.27689	biogenesis of lysosome-related organelles complex 1 subunit 3-like isoform X2	0.9281		-1.25658	3.31365e-17	303.435	-1.88756	1.48589e-32	444.459	-2.05358	1.02746e-55	473.977	-1.73257	-0.553775	2.10761e-05	351.382	-1.18974	1.14137e-17	491.205	-1.34563	5.5533e-37	518.69	-1.02971	-0.590576	8.76424e-06	366.259	-1.22858	4.97566e-18	513.249	-1.38598	2.16394e-37	541.999	-1.06838
CGI_10023739	-1.0501	-1.38878	-1.41156	-1.28348	Cyclin-G1	0.68		-1.30766	7.31241e-09	1555.34	-0.899073	1.46576e-05	1302.9	-0.943566	6.28437e-07	1301.37	-1.0501	-1.64599	8.85898e-19	1427.89	-1.23729	2.63486e-15	1179.3	-1.28306	1.81364e-22	1179.03	-1.38878	-1.66766	1.0314e-20	1500.19	-1.26036	2.2185e-18	1237.86	-1.30666	2.37047e-29	1237.39	-1.41156
CGI_10005628	-1.3339	-0.80677	-1.72561	-1.28876	mannan endo-1,4-beta-mannosidase-like	0.7015		-1.18058	6.59461e-10	92.7824	-1.18214	1.97849e-13	95.7358	-1.63897	6.98337e-22	119.581	-1.3339	-0.663054	0.00787673	102.153	-0.658903	0.00352872	105.555	-1.09835	4.81347e-07	128.532	-0.80677	-1.56778	8.65238e-19	88.2764	-1.57925	9.57931e-27	91.0889	-2.0298	6.39292e-37	115.59	-1.72561
CGI_10009937	-0.872837	-1.48843	-1.59006	-1.31711	cytochrome P450 3A4-like	0.7735		-1.36228	2.04587e-26	327.181	-0.543436	0.00026222	232.11	-0.712793	5.26987e-07	244.694	-0.872837	-1.98048	6.63905e-57	287.473	-1.16008	1.12261e-16	193.786	-1.32473	1.50235e-22	206.595	-1.48843	-2.08282	3.61724e-84	298.731	-1.26017	1.09619e-24	199.915	-1.42717	4.15834e-33	213.409	-1.59006
CGI_10022669	-1.60136	-1.05345	-1.35714	-1.33731	hypothetical protein CGI_10022669	0.715		-1.09351	1.03288e-05	45.4498	-1.95975	6.68837e-21	75.4511	-1.7508	7.92658e-15	65.9335	-1.60136	-0.547129	0.00823735	51.2946	-1.40984	5.21832e-18	80.8346	-1.20337	2.03333e-11	71.3999	-1.05345	-0.846078	2.40833e-05	49.7762	-1.71657	5.87499e-25	80.7096	-1.50876	1.41968e-16	70.8245	-1.35714
CGI_10010593	-0.925471	-1.7352	-1.40902	-1.35657	Transient receptor potential cation channel subfamily M member 3	0.9195		-0.748136	0.000305208	467.165	-1.04472	1.69369e-09	556.196	-0.98356	1.61632e-09	528.549	-0.925471	-1.54768	9.09876e-21	382.026	-1.85917	2.96714e-45	466.034	-1.79876	9.00388e-55	440.296	-1.7352	-1.2242	1.23985e-10	427.368	-1.53262	4.42179e-22	516.72	-1.47025	1.25526e-23	488.965	-1.40902
CGI_10018716	-0.995379	-1.80931	-1.42399	-1.40956	hypothetical protein CGI_10018716	1		-0.910001	0.009444	12.5677	-1.26771	0.00021663	15.858	-0.808422	0.0197807	11.9954	-0.995379	-1.73833	4.18887e-06	9.98748	-2.04644	3.32271e-08	13.1158	-1.64315	1.00216e-05	9.38933	-1.80931	-1.33712	0.000165957	11.4949	-1.6844	1.64431e-06	14.8244	-1.25046	0.000354006	10.878	-1.42399
CGI_10004761	-2.17788	-0.875434	-1.18688	-1.4134	Kelch 3	0.7005		-1.76631	3.88232e-21	40.9642	-2.56814	3.58322e-30	71.4954	-2.19918	4.75217e-25	54.8272	-2.17788	-0.453431	0.0441207	53.5996	-1.27709	3.52011e-08	83.9267	-0.895784	8.1681e-05	67.3982	-0.875434	-0.758004	5.9409e-06	51.8483	-1.59331	8.43121e-15	83.5814	-1.20932	3.81068e-10	66.2432	-1.18688
CGI_10017366	-1.32	-1.33258	-1.62798	-1.42685	BTB POZ domain-containing 2-like [Crassostrea gigas]	0.497		-0.858228	0.00141612	23.2134	-1.75769	1.70048e-09	40.8721	-1.34409	6.12242e-06	31.386	-1.32	-0.887136	0.00169879	22.3448	-1.75946	2.33184e-09	39.5483	-1.35113	7.22034e-06	30.2924	-1.33258	-1.17612	4.23844e-06	22.0151	-2.05906	4.27721e-13	40.0711	-1.64874	9.76999e-09	30.3364	-1.62798
CGI_10022489	-1.87457	-1.54076	-1.02703	-1.48079	alkyl aryl-sulfatase BDS1-like [Aplysia californica]	0.5975		-2.11256	2.0592e-40	114.876	-1.28202	3.4484e-14	75.7208	-2.22914	1.6792e-52	124.757	-1.87457	-1.78037	1.90211e-27	116.998	-0.953668	8.43418e-08	79.1303	-1.88824	1.2061e-35	126.729	-1.54076	-1.26882	1.28593e-19	135.702	-0.435178	0.00646567	96.3192	-1.3771	2.17268e-27	146.153	-1.02703
CGI_10020401	-1.96113	-1.11949	-1.42075	-1.50046	cytochrome P450 10-like	0.704		-1.65904	2.07029e-07	52.5961	-2.39159	1.2832e-14	87.7249	-1.83276	3.29564e-12	56.3211	-1.96113	-0.84794	0.0155603	60.8187	-1.54744	1.34426e-06	95.4658	-0.963096	0.000976798	64.6649	-1.11949	-1.13071	0.000400317	59.8976	-1.85708	9.35443e-10	96.242	-1.27445	8.77197e-07	63.8389	-1.42075
CGI_10020402	-1.91201	-1.19814	-1.61008	-1.57341	cytochrome P450 10-like	0.6925		-1.6541	4.75441e-09	169.773	-2.2801	4.32e-16	260.921	-1.80182	3.36293e-16	180.066	-1.91201	-0.996816	0.00218994	187.523	-1.49891	2.48429e-05	277.34	-1.0987	5.94751e-05	198.072	-1.19814	-1.38781	3.2071e-06	181.703	-1.91857	7.48221e-09	275.726	-1.52386	2.87663e-10	192.411	-1.61008
CGI_10022049	-1.57818	-1.57634	-1.59105	-1.58186	receptor-type tyrosine- phosphatase T-like	0.7135		-2.10432	4.44647e-20	307.407	-1.19012	1.23426e-06	189.144	-1.44011	1.75571e-07	216.658	-1.57818	-2.13207	8.07473e-52	301.479	-1.17317	7.02389e-14	186.554	-1.42379	1.3981e-11	213.214	-1.57634	-2.14999	9.31453e-79	317.811	-1.18426	2.81744e-20	196.747	-1.4389	1.78065e-13	224.762	-1.59105
CGI_10021592	-1.65588	-1.74475	-1.40839	-1.60301	multiple epidermal growth factor-like domains 10	0.6935		-1.71189	5.88011e-17	62.4331	-0.778509	0.000439918	39.9425	-2.47725	1.61616e-25	104.233	-1.65588	-1.80811	1.19571e-20	59.8921	-0.872235	3.36919e-05	37.981	-2.55392	1.0511e-29	100.55	-1.74475	-1.46437	6.71798e-20	67.143	-0.512876	0.00412334	44.2206	-2.24793	7.04627e-29	109.976	-1.40839
CGI_10005579	-1.66882	-1.80075	-1.35115	-1.60691	PREDICTED: uncharacterized protein LOC105349214	0.76		-1.57809	0.00061193	3.76267	-1.55159	0.00148154	4.15796	-1.87678	4.08472e-05	4.85901	-1.66882	-1.75397	0.000111877	3.43851	-1.66458	0.000318644	3.81822	-1.9837	6.76448e-06	4.50171	-1.80075	-1.25992	0.0051654	4.16355	-1.23294	0.0101002	4.58503	-1.56057	0.000458751	5.29242	-1.35115
CGI_10003833	-0.866612	-1.99878	-2.00968	-1.62502	MAM domain-containing glycosylphosphatidylinositol anchor 1-like	0.6965		-1.13216	2.9744e-11	93.3728	-0.46743	0.0258727	71.758	-1.00024	2.50668e-10	89.0703	-0.866612	-2.26702	1.12834e-41	75.136	-1.59448	4.61244e-17	53.4903	-2.13482	3.53373e-42	70.6179	-1.99878	-2.25798	2.55565e-21	78.2712	-1.61347	9.69274e-10	55.4579	-2.1576	5.24686e-22	73.4789	-2.00968
CGI_10006542	-1.59334	-2.31786	-0.99392	-1.63504	bcl-2 1	0.651		-1.55873	0.00100732	53.5795	-1.55877	0.00143241	64.7049	-1.66251	0.000650792	60.2073	-1.59334	-2.24795	5.50029e-19	60.2398	-2.31715	3.46873e-14	71.4653	-2.38848	4.12802e-23	66.8608	-2.31786	-0.891192	2.51929e-07	82.3452	-1.0592	2.6327e-05	94.8791	-1.03136	1.91894e-10	89.6678	-0.99392
CGI_10008971	-1.33177	-1.59186	-1.98425	-1.63596	probable cytochrome P450 49a1 [Biomphalaria glabrata]	0.562		-1.41836	0.00162727	59.3126	-1.27727	0.000507298	46.7906	-1.29969	0.000487914	46.8648	-1.33177	-1.75643	1.7715e-06	56.3439	-1.50266	1.82121e-07	44.1214	-1.51651	3.88472e-07	44.1861	-1.59186	-2.12194	9.2744e-10	56.9327	-1.90804	7.36966e-14	43.9378	-1.92277	8.87391e-13	44.0493	-1.98425
CGI_10019682	-1.38374	-2.32036	-1.2198	-1.6413	hypothetical protein CGI_10019682	0.995		-1.58339	1.50137e-12	48.0468	-1.84541	7.13321e-19	57.5326	-0.722412	0.002644	31.4099	-1.38374	-2.5147	4.04394e-24	40.996	-2.77651	2.49235e-32	50.0416	-1.66986	8.95534e-11	24.6907	-2.32036	-1.41981	1.09194e-10	50.7396	-1.68222	1.12563e-16	60.5588	-0.557355	0.0194798	33.7144	-1.2198
CGI_10001302	-1.51997	-1.82018	-1.65908	-1.66641	A-kinase anchor 9-like	0.834		-1.74328	9.45617e-24	87.7189	-1.83003	1.63189e-26	95.5783	-0.986611	5.99844e-06	60.5936	-1.51997	-2.04868	1.17655e-31	81.6516	-2.13298	5.08124e-35	89.2123	-1.27888	2.80705e-09	55.1697	-1.82018	-1.88268	3.21564e-27	87.9222	-1.97171	3.36968e-30	95.9748	-1.12286	2.5673e-07	60.0854	-1.65908
CGI_10018726	-2.75192	-1.4794	-0.78105	-1.67079	transmembrane GTPase Marf-like	0.607		-2.43758	3.43324e-31	40.4929	-3.25023	2.95945e-41	75.0281	-2.56795	4.31697e-29	45.747	-2.75192	-1.15675	5.05865e-06	47.7542	-1.98532	1.61713e-14	81.7802	-1.29614	6.33504e-07	53.0509	-1.4794	-0.434665	0.0090175	61.5529	-1.31929	7.78089e-12	97.8163	-0.589198	0.00129858	67.3341	-0.78105
CGI_10018739	-2.43541	-1.49349	-1.20719	-1.71203	kynurenine formamidase-like [Biomphalaria glabrata]	0.714		-2.09168	2.4685e-61	1091.74	-2.76428	2.57757e-140	1682.5	-2.45028	3.82662e-126	1360.13	-2.43541	-1.15762	8.15817e-17	1245.55	-1.82126	2.6436e-50	1829.31	-1.50159	7.08422e-37	1510.96	-1.49349	-0.870585	6.44759e-10	1402.11	-1.53526	6.77818e-36	2020.34	-1.21574	7.30794e-25	1682.66	-1.20719
CGI_10003826	-1.84477	-2.03538	-1.29041	-1.72352	zinc finger 554-like isoform X1 [Poecilia formosa]	0.6735		-2.19613	1.77329e-08	20.0492	-1.57479	3.56871e-05	12.0087	-1.76338	2.04268e-06	13.3119	-1.84477	-2.37697	7.67464e-10	18.9791	-1.77436	2.63283e-06	11.1475	-1.9548	1.04698e-07	12.4163	-2.03538	-1.69136	1.67164e-06	22.4107	-0.991733	0.00315874	14.2552	-1.18812	0.000253323	15.5462	-1.29041
CGI_10008649	-2.29954	-2.02556	-0.870661	-1.73192	hypothetical protein CGI_10008649	0.813		-1.91399	1.20273e-15	24.8243	-2.15372	1.071e-20	29.4357	-2.83091	5.28097e-37	44.5119	-2.29954	-1.64819	3.02823e-11	25.2114	-1.8801	1.38162e-15	29.7644	-2.54838	5.6807e-30	44.3911	-2.02556	-0.485643	0.0229201	35.0806	-0.719562	0.000201626	40.2028	-1.40678	3.13654e-15	55.4332	-0.870661
CGI_10008880	-2.08371	-1.69474	-1.53195	-1.77013	kyphoscoliosis peptidase-like	0.516		-1.32619	4.47868e-06	14.7391	-3.27679	1.0496e-48	49.9826	-1.64813	2.50224e-09	17.9422	-2.08371	-0.94883	0.00148344	15.5968	-2.88086	1.22669e-41	50.0012	-1.25453	6.02656e-06	18.7476	-1.69474	-0.775001	0.00592729	17.2688	-2.72794	3.21087e-43	53.5166	-1.09291	2.95167e-05	20.5903	-1.53195
CGI_10011083	-1.08831	-1.2338	-3.25992	-1.86068	PREDICTED: uncharacterized protein LOC105348627	0.8757		-0.650257	0.00573753	542.965	-1.09973	1.19273e-07	697.748	-1.51495	7.73176e-15	848.795	-1.08831	-0.799185	0.000522858	506.717	-1.24704	1.25315e-09	656.823	-1.65518	1.21789e-17	803.961	-1.2338	-2.79121	1.49475e-62	389.356	-3.27704	2.24477e-111	541.604	-3.71151	2.42591e-174	698.919	-3.25992
CGI_10023218	-2.74531	-1.66352	-1.21925	-1.87602	hypothetical protein CGI_10023218	0.5744		-3.15239	9.34607e-19	35.4453	-2.83806	2.36564e-13	30.5475	-2.24548	6.2636e-09	17.9882	-2.74531	-2.08059	2.57261e-10	38.2227	-1.77542	5.52566e-07	33.6291	-1.13454	0.00180733	21.3069	-1.66352	-1.65425	2.95641e-10	43.7626	-1.35168	8.9137e-06	39.0771	-0.651812	0.0302653	26.0274	-1.21925
CGI_10015659	-2.89553	-1.42237	-1.42355	-1.91381	cell death abnormality 1-like	0.7485		-2.69905	1.65449e-18	16.0822	-2.97329	1.5535e-21	20.2811	-3.01425	1.55543e-19	21.9775	-2.89553	-1.20927	2.03659e-06	19.6271	-1.4833	6.15288e-09	23.8902	-1.57453	3.91149e-08	25.4526	-1.42237	-1.20625	1.04968e-06	20.8589	-1.48614	2.96662e-09	25.3466	-1.57824	3.14643e-08	26.98	-1.42355
CGI_10009360	-2.1569	-1.73313	-1.96786	-1.95263	hypothetical protein CGI_10009360	0.8517		-1.56279	7.24059e-06	10.8634	-2.42575	1.97723e-14	19.4462	-2.48215	1.4483e-16	19.3712	-2.1569	-1.15684	0.000536872	11.5749	-1.99831	1.13935e-11	19.9869	-2.04423	2.52737e-13	19.8796	-1.73313	-1.37566	0.000161463	11.4874	-2.22908	7.39148e-12	20.3111	-2.29884	8.37309e-14	20.2023	-1.96786
CGI_10005772	-1.82297	-1.63047	-2.41742	-1.95695	hypothetical protein CGI_10005772	1		-1.84224	1.12773e-16	45.8104	-1.57582	4.11836e-13	40.6272	-2.05084	9.33964e-22	52.5399	-1.82297	-1.65503	1.26376e-13	45.8685	-1.38487	2.58405e-10	40.8941	-1.8515	4.47135e-18	52.4506	-1.63047	-2.427	7.70949e-23	43.2409	-2.17977	1.84928e-19	37.8054	-2.6455	9.0719e-29	50.0397	-2.41742
CGI_10000132	-1.82054	-2.18195	-1.90636	-1.96962	PREDICTED: uncharacterized protein LOC105323533 [Crassostrea gigas]	0.995		-1.23924	1.6014e-10	76.2894	-2.27006	1.02343e-23	146.416	-1.95233	8.52282e-26	115.154	-1.82054	-1.61873	2.4896e-13	68.5529	-2.61318	5.76972e-27	136.688	-2.31393	2.95494e-28	106.274	-2.18195	-1.33487	2.94114e-08	75.8818	-2.34682	4.02581e-20	147.776	-2.0374	2.30549e-19	115.597	-1.90636
CGI_10005430	-2.08847	-1.61008	-2.27172	-1.99009	A disintegrin and metallo ase with thrombospondin motifs 13	0.691		-1.98935	8.85542e-06	107.28	-1.67538	0.000490105	88.9755	-2.60069	4.19807e-10	152.172	-2.08847	-1.56934	2.34683e-06	118.623	-1.07917	0.0135337	101.418	-2.18173	1.63884e-19	162.583	-1.61008	-2.163	9.13231e-08	110.205	-1.77021	6.60807e-05	91.5041	-2.88194	1.35972e-16	156.072	-2.27172
CGI_10022844	-2.1805	-1.69413	-2.1153	-1.99664	amine oxidase [flavin-containing] B	0.7445		-1.8799	1.29155e-15	29.2383	-1.17001	3.92617e-05	20.6634	-3.49158	1.07202e-74	80.2928	-2.1805	-1.39404	9.87199e-09	30.8889	-0.692933	0.026167	22.6524	-2.99542	4.20547e-60	80.6304	-1.69413	-1.81061	1.44699e-13	30.1007	-1.1095	0.000198641	21.3324	-3.42579	4.3073e-72	82.389	-2.1153
CGI_10004152	-2.39963	-1.74501	-1.87272	-2.00579	PREDICTED: uncharacterized protein LOC105337641 [Crassostrea gigas]	0.61		-1.65576	1.0113e-07	13.2409	-1.86523	2.69597e-08	16.0984	-3.67789	4.10837e-50	49.5458	-2.39963	-1.00722	0.00127033	14.7809	-1.22169	0.000188119	17.6518	-3.00613	3.94107e-40	50.1545	-1.74501	-1.11784	3.73479e-05	15.3503	-1.35377	2.27871e-06	18.3622	-3.14656	3.10244e-50	52.5737	-1.87272
CGI_10016738	-3.71941	-1.23796	-1.08939	-2.01559	meiosis expressed gene 1 homolog	0.751		-3.50246	1.61233e-37	30.9712	-3.89962	4.88451e-47	41.9808	-3.75614	2.906e-40	38.3848	-3.71941	-1.01871	2.9671e-07	41.7036	-1.40857	4.27124e-14	52.9214	-1.28662	1.11571e-09	49.1698	-1.23796	-0.863234	2.61294e-07	45.8349	-1.26015	1.58278e-15	57.7124	-1.14477	2.08476e-10	53.702	-1.08939
CGI_10018369	-1.73982	-3.37715	-1.03196	-2.04964	F-box LRR-repeat 4	0.724		-1.4221	2.46083e-05	751.463	-1.91016	8.53095e-10	1032.45	-1.88721	3.0493e-09	1008.06	-1.73982	-3.02031	6.53891e-52	616.555	-3.57503	2.11475e-108	886.377	-3.53612	6.68689e-91	863.966	-3.37715	-0.695842	0.000265871	939.669	-1.20972	1.58917e-19	1234.93	-1.19031	4.27161e-15	1205.8	-1.03196
CGI_10004314	-1.83777	-1.97503	-2.44486	-2.08589	hypothetical protein CGI_10004314	0.79		-3.31768	6.0328e-34	32.7095	-0.885836	0.0326344	7.49186	-1.3098	0.00120621	9.7096	-1.83777	-3.45193	2.62534e-33	31.3828	-1.04178	0.0138914	6.8229	-1.43139	0.000421169	8.98711	-1.97503	-3.92276	2.19713e-38	32.3588	-1.51541	0.000317702	6.46863	-1.89641	5.25913e-06	8.75376	-2.44486
CGI_10014840	-2.3501	-2.32505	-1.84253	-2.17256	short-chain collagen C4-like [Crassostrea gigas]	0.708		-2.01351	1.58637e-17	67.1966	-1.82801	3.56947e-15	62.0722	-3.20879	1.40767e-83	136.944	-2.3501	-1.99821	2.39357e-13	64.8088	-1.81514	1.61637e-11	59.8328	-3.16179	1.29061e-51	132.676	-2.32505	-1.51858	4.35716e-14	74.8777	-1.32303	1.21528e-11	69.8846	-2.68599	8.16878e-89	146.403	-1.84253
CGI_10003487	-1.83143	-1.98057	-2.8825	-2.2315	hypothetical protein CGI_10003487	0.89		-2.18137	4.91624e-15	80.0572	-1.2808	0.00762665	61.3232	-2.03212	3.53248e-12	74.6191	-1.83143	-2.37104	5.28691e-31	77.1296	-1.37863	0.00149757	58.9099	-2.19204	8.3027e-23	71.8086	-1.98057	-3.37796	1.79827e-33	73.9561	-2.05141	5.7632e-06	54.4676	-3.21812	1.70579e-27	68.1622	-2.8825
CGI_10000603	-2.43502	-2.57232	-1.68808	-2.2318	Baculoviral IAP repeat-containing 3	0.7705		-3.08551	6.69002e-36	37.7965	-2.28367	1.16206e-16	23.3892	-1.93587	2.52104e-10	18.9259	-2.43502	-3.23923	9.39005e-34	36.2105	-2.42226	3.91966e-16	22.1791	-2.05546	3.81475e-10	17.8287	-2.57232	-2.34044	1.54112e-27	41.5742	-1.52959	6.52044e-10	26.9393	-1.19421	2.75946e-05	22.2872	-1.68808
CGI_10004421	-2.2373	-2.93823	-1.6371	-2.27087	[Nematostella vectensis]	0.6353		-1.75037	1.8431e-06	14.1728	-2.85448	2.70999e-24	27.3828	-2.10704	1.08681e-12	16.4011	-2.2373	-2.42186	6.43997e-10	12.3123	-3.55224	2.76835e-28	25.1383	-2.84057	4.90328e-17	14.4462	-2.93823	-1.16787	0.00215066	16.1783	-2.24696	3.64578e-17	29.8154	-1.49648	1.85306e-07	18.4947	-1.6371
CGI_10007538	-3.49322	-1.2761	-2.15887	-2.3094	hypothetical protein CGI_10007538	0.836		-3.40935	2.56942e-19	12.0184	-4.16101	3.13714e-29	22.5735	-2.90931	2.26085e-12	8.67725	-3.49322	-1.17861	3.10709e-05	15.7582	-1.96899	5.3483e-14	26.2191	-0.680702	0.0493419	12.5927	-1.2761	-2.0709	1.4852e-11	14.1838	-2.85511	3.16333e-22	25.1014	-1.5506	1.42533e-05	10.7928	-2.15887
CGI_10003048	-3.0978	-0.993585	-2.83924	-2.31021	hypothetical protein CGI_10003048	0.7864		-3.00943	1.98577e-40	50.5759	-2.72461	1.66403e-37	42.3927	-3.55936	7.72345e-67	72.4025	-3.0978	-0.927599	1.4712e-07	67.3554	-0.601909	0.000224792	60.1482	-1.45125	4.58193e-23	88.9826	-0.993585	-2.75227	1.42262e-38	53.0274	-2.46389	1.82769e-35	44.7298	-3.30156	1.42533e-66	75.3944	-2.83924
CGI_10014528	-2.83505	-2.47018	-1.714	-2.33974	Multiple epidermal growth factor-like domains 10	0.705		-2.56377	5.44364e-25	58.8594	-3.20059	1.29655e-51	88.6837	-2.7408	2.61412e-33	65.3034	-2.83505	-2.21581	7.74874e-19	59.2958	-2.82636	1.4608e-39	88.4929	-2.36837	1.00118e-24	65.6151	-2.47018	-1.46237	1.97863e-12	70.783	-2.06713	1.51698e-33	101.842	-1.6125	5.32063e-18	77.5673	-1.714
CGI_10018727	-3.11084	-2.35824	-1.61157	-2.36022	Multiple epidermal growth factor-like domains 6	0.7385		-2.86673	1.81642e-12	17.8088	-3.08757	8.54579e-17	16.7394	-3.37823	3.84011e-20	21.3233	-3.11084	-2.17498	7.17674e-08	18.2698	-2.30214	7.02039e-11	17.2855	-2.5976	1.06163e-13	21.7087	-2.35824	-1.49192	4.93391e-05	22.0392	-1.5042	5.81807e-07	21.1055	-1.83859	1.15311e-09	25.6973	-1.61157
CGI_10007644	-2.4419	-2.563	-2.2715	-2.42546	hypothetical protein CGI_10007644	0.564		-1.48224	0.00262181	3.01073	-2.36645	1.33241e-07	5.10757	-3.477	6.61373e-18	12.5342	-2.4419	-1.63928	0.000444256	2.71084	-2.4956	1.0481e-08	4.74882	-3.5541	4.44858e-19	11.9749	-2.563	-1.26582	0.00911203	3.16258	-2.19668	5.37153e-07	5.31597	-3.35201	1.63964e-17	12.9148	-2.2715
CGI_10003453	-3.35987	-2.9959	-0.990469	-2.44875	fibroblast growth factor receptor-like 1 [Lingula anatina]	0.6115		-3.13741	2.24247e-25	24.0105	-3.59646	5.53737e-34	34.1636	-3.34576	4.35739e-30	27.5334	-3.35987	-2.78324	2.63805e-18	23.7227	-3.2273	1.76966e-26	33.6502	-2.97715	6.34754e-23	27.158	-2.9959	-0.784281	0.00954314	35.304	-1.22874	9.76624e-06	46.1734	-0.958385	0.000701469	39.1279	-0.990469
CGI_10013166	-2.21418	-2.55912	-2.59109	-2.4548	hypothetical protein CGI_10013166	1		-2.27606	1.34978e-07	8.87537	-2.63287	8.65043e-11	10.1566	-1.73362	9.75805e-05	4.98511	-2.21418	-2.60792	1.50584e-09	8.17207	-2.95478	5.00466e-13	9.41121	-2.11466	1.3818e-06	4.37451	-2.55912	-2.57479	3.21837e-09	8.66222	-3.02293	3.11964e-13	9.96568	-2.17556	1.30675e-06	4.66207	-2.59109
CGI_10010492	-2.94124	-2.14505	-2.74868	-2.61166	hypothetical protein CGI_10010492	1		-2.08276	1.86261e-08	23.5231	-3.29752	9.08317e-42	44.7868	-3.44346	2.60295e-34	52.8856	-2.94124	-1.35883	9.38491e-05	26.0283	-2.44916	1.5231e-31	46.8952	-2.62716	3.8792e-26	54.6548	-2.14505	-1.89222	3.28072e-07	24.6148	-3.10585	1.26122e-39	46.4762	-3.24798	2.40849e-31	54.6917	-2.74868
CGI_10004844	-3.95977	-2.39886	-1.65577	-2.67147	cell death abnormality 1-like	0.7745		-3.90777	2.43016e-25	25.4259	-3.91406	1.2185e-25	23.2558	-4.05748	3.36665e-29	24.3487	-3.95977	-2.40669	2.18348e-10	26.7324	-2.32738	1.94654e-10	24.7293	-2.4625	1.46002e-12	25.7269	-2.39886	-1.69761	2.79276e-08	32.0377	-1.5764	2.70828e-08	30.0624	-1.6933	8.61713e-11	31.0326	-1.65577
CGI_10011860	-2.23538	-2.51986	-3.3784	-2.71121	Atrial natriuretic peptide receptor A	0.7035		-1.29801	9.04568e-05	11.2122	-2.00961	1.50841e-10	18.1176	-3.39852	3.78237e-34	44.9651	-2.23538	-1.6181	2.44934e-06	10.1255	-2.29469	1.09093e-12	16.8296	-3.6468	9.29745e-37	42.9622	-2.51986	-2.48361	1.66558e-11	9.37277	-3.16109	7.31703e-19	16.3821	-4.4905	3.16606e-43	43.8951	-3.3784
CGI_10002306	-2.89934	-2.94074	-2.51507	-2.78505	ribosomal L1 domain-containing 1- partial	0.9733		-2.02622	5.09927e-08	7.8691	-2.78244	2.33224e-16	13.2347	-3.88937	2.52275e-33	30.6955	-2.89934	-2.07521	3.39134e-07	7.34045	-2.85131	1.29872e-15	12.5651	-3.89568	5.24012e-31	29.5518	-2.94074	-1.63481	2.53237e-06	8.63958	-2.3832	1.22909e-14	14.1747	-3.5272	1.33719e-32	32.0255	-2.51507
CGI_10000138	-2.9609	-3.10991	-2.42247	-2.83109	E3 SUMO- ligase 2-like	0.627		-3.06047	3.37729e-17	13.7081	-2.39371	5.07206e-09	9.06051	-3.42852	8.17812e-23	17.1718	-2.9609	-3.23787	4.1285e-18	13.0372	-2.5366	4.09435e-10	8.51003	-3.55525	1.2968e-23	16.4008	-3.10991	-2.52849	9.31376e-15	14.7872	-1.8588	6.31888e-07	10.0615	-2.88012	9.70135e-21	18.3424	-2.42247
CGI_10000562	-3.35012	-2.78041	-2.60238	-2.91097	2 -deoxynucleoside 5 -phosphate N-hydrolase 1	0.758		-2.52243	5.37323e-08	4.36335	-4.05416	1.25332e-21	13.3388	-3.47378	2.25026e-15	7.3464	-3.35012	-2.02158	7.46445e-06	4.49841	-3.46199	4.06412e-19	13.2619	-2.85766	1.18134e-12	7.40654	-2.78041	-1.81472	4.96411e-05	4.99119	-3.30878	1.55247e-18	14.224	-2.68366	8.32288e-12	8.05342	-2.60238
CGI_10012847	-2.45243	-3.27974	-3.68929	-3.14049	THAP domain-containing 4	0.739		-2.79436	2.56677e-16	15.2825	-2.19841	2.41593e-09	10.1935	-2.36453	9.96695e-11	11.4065	-2.45243	-3.62201	2.09803e-21	13.88	-3.04108	2.53564e-14	8.89739	-3.17614	7.32599e-16	10.0891	-3.27974	-3.97269	2.40714e-24	14.4488	-3.4696	6.20627e-17	9.18963	-3.62559	1.78226e-18	10.4458	-3.68929
CGI_10000080	-5.42818	-1.46243	-2.54014	-3.14359	Cytochrome b5	0.807		-5.2183	2.17644e-42	146.354	-5.33665	4.57053e-62	73.2349	-5.72958	2.60599e-78	92.7405	-5.42818	-1.97757	1.32411e-18	174.113	-1.02176	2.88137e-08	104.281	-1.38797	1.00585e-18	122.607	-1.46243	-3.00578	8.3437e-35	164.48	-2.11631	4.22084e-26	90.1309	-2.49835	2.75222e-46	109.736	-2.54014
CGI_10005437	-4.27152	-3.46847	-1.94191	-3.2273	hypothetical protein CGI_10005437	1		-5.0414	1.7137e-40	46.9154	-4.5162	3.80613e-31	23.6875	-3.25698	1.86417e-14	8.02462	-4.27152	-4.34987	3.52553e-35	46.2168	-3.69439	5.14077e-27	23.6597	-2.36116	9.85774e-10	8.37196	-3.46847	-2.95959	3.51115e-24	52.4349	-2.14507	2.02876e-16	28.8161	-0.721075	0.0242974	12.6505	-1.94191
CGI_10025774	-3.80838	-3.3604	-3.64842	-3.60574	immunoglobulin superfamily member 10- partial	0.651		-4.7471	4.94336e-34	24.9388	-2.87563	5.72245e-10	4.56173	-3.80242	2.0044e-18	12.1806	-3.80838	-4.37631	1.96315e-32	24.4181	-2.37153	4.58021e-08	4.59712	-3.33337	1.33244e-16	12.002	-3.3604	-4.60866	6.81829e-35	25.6434	-2.68111	1.65451e-09	4.76328	-3.6555	2.7908e-18	12.5602	-3.64842
CGI_10006434	-4.60334	-3.44695	-4.16763	-4.07264	hypothetical protein CGI_10006434	0.6775		-4.55247	9.0764e-42	34.6954	-4.56336	2.06217e-41	33.541	-4.6942	3.87388e-44	37.3364	-4.60334	-3.43629	1.49905e-35	35.3468	-3.37958	8.5166e-37	34.3239	-3.52498	1.94018e-39	37.9472	-3.44695	-4.12923	1.52885e-42	36.0712	-4.11103	6.22482e-43	34.9417	-4.26264	1.30533e-45	38.7674	-4.16763
CGI_10006435	-4.49415	-5.12092	-3.96667	-4.52725	THAP domain-containing 2	0.7265		-4.24657	7.84795e-65	125.813	-4.51412	1.76079e-91	145.388	-4.72177	7.66331e-92	170.528	-4.49415	-4.87602	6.74572e-67	120.006	-5.15552	4.2673e-90	139.119	-5.33124	6.68689e-91	163.46	-5.12092	-3.72973	1.16902e-60	131.589	-3.97635	9.5203e-91	151.866	-4.19394	1.03498e-89	177.373	-3.96667
CGI_10024724	-3.01381	-4.12942	-6.95548	-4.69957	Histone H4 transcription factor	0.81		-3.02298	7.90473e-62	195.828	-3.53286	4.43934e-103	278.098	-2.48558	1.56857e-41	141.231	-3.01381	-4.1272	2.04749e-25	173.524	-4.52438	1.63235e-31	253.191	-3.7367	5.15103e-21	120.012	-4.12942	-6.90601	1.82172e-103	180.656	-7.44565	1.4341e-122	264.459	-6.51479	1.84581e-84	124.236	-6.95548
CGI_10012034	5.5625	5.29535	NS	5.42893	Cell adhesion molecule 3	0.657		4.8027	1.99138e-46	842.321	6.57531	1.7657e-90	865.631	5.30948	6.53764e-50	853.311	5.5625	4.46297	9.31352e-48	563.401	6.45605	1.36556e-134	574.82	4.96704	1.37805e-53	569.737	5.29535	NS	NS	NS	2.06636	3.35152e-15	21.5823	0.930513	0.00270613	26.0712	NS
CGI_10001774	5.18676	5.58585	NS	5.38631	toll-like receptor 3 [Lingula anatina]	0.7538		1.82217	1.12638e-14	174.897	7.02685	9.01255e-91	144.866	6.71128	2.75508e-93	142.285	5.18676	2.35268	1.91603e-26	235.676	7.33589	4.19464e-120	208.955	7.06897	2.99416e-123	205.592	5.58585	NS	NS	NS	4.572	6.47696e-31	24.4993	4.25457	7.62021e-29	24.317	NS
CGI_10002305	5.1969	4.59648	NS	4.89669	Carboxypeptidase B	0.556		6.52374	5.90934e-235	1172.56	2.2727	5.99579e-21	1431.87	6.79427	1.74426e-249	1195.16	5.1969	5.92382	1.70405e-160	807.122	1.70034	7.45494e-09	1045.5	6.16527	4.58484e-174	823.526	4.59648	NS	NS	NS	-3.7404	1.17537e-50	240.317	0.595988	0.0201253	21.272	NS
CGI_10013868	5.07702	4.34716	NS	4.71209	hypothetical protein CGI_10013868	0.6733		4.5497	2.82259e-43	38.2885	5.31404	2.5683e-45	39.2279	5.36732	7.79386e-45	38.3907	5.07702	3.87291	2.37613e-31	22.6943	4.55499	1.34137e-35	22.9961	4.61357	1.68553e-35	22.5276	4.34716	NS	NS	NS	NS	NS	NS	NS	NS	NS	NS
CGI_10005791	4.73233	4.68426	NS	4.70829	VWFA and cache domain-containing 1	0.653		6.47421	1.61019e-80	114.998	1.21402	1.55244e-16	170.019	6.50875	3.93445e-81	117.442	4.73233	6.42319	9.2844e-86	114.385	1.24363	1.23918e-19	167.989	6.38596	4.90372e-89	116.957	4.68426	4.65192	2.07549e-36	27.4671	-0.835334	8.21297e-07	80.1817	4.67873	1.44324e-36	28.1049	2.83177
CGI_10020832	5.02967	3.26183	NS	4.14575	hypothetical protein CGI_10020832	0.8		5.26896	7.30386e-62	67.7153	5.11803	1.13118e-64	70.8129	4.70201	1.68899e-62	70.0359	5.02967	3.55387	4.59526e-24	19.1127	3.3297	8.09897e-24	20.2165	2.90192	1.12046e-19	20.4378	3.26183	NS	NS	NS	NS	NS	NS	NS	NS	NS	NS
CGI_10003370	3.83713	3.71772	NS	3.77742	Ribulose-5-phosphate 4-epimerase and related epimerases and aldolases [Legionella pneumophila]	0.6318		4.20849	5.3344e-34	25.0117	3.85252	5.5652e-34	26.5606	3.45038	1.18924e-30	26.5658	3.83713	4.09231	8.23577e-33	24.3642	3.72301	9.34004e-33	25.8514	3.33783	1.65521e-28	25.9159	3.71772	NS	NS	NS	NS	NS	NS	NS	NS	NS	NS
CGI_10002039	3.94505	3.5585	NS	3.75178	glutamate receptor-like	0.588		4.99848	9.94786e-97	136.073	2.41411	1.48189e-35	162.566	4.42257	7.8619e-95	141.053	3.94505	4.59494	6.76929e-72	107.477	2.06671	1.19597e-21	132.18	4.01386	7.12104e-66	111.956	3.5585	NS	NS	NS	-2.13044	2.19761e-14	29.3778	NS	NS	NS	NS
CGI_10001768	4.06216	3.41188	NS	3.73702	rRNA-processing FCF1	0.898		3.48491	1.34147e-33	40.4126	4.19036	2.67816e-39	40.8428	4.51121	3.19822e-40	39.5517	4.06216	2.86392	1.8909e-23	25.329	3.52567	2.44705e-29	25.1625	3.84606	5.75245e-31	24.2342	3.41188	NS	NS	NS	NS	NS	NS	NS	NS	NS	NS
CGI_10026512	3.57147	3.71585	NS	3.64366	zinc finger MYM-type 3-like	0.9867		3.44377	4.98975e-27	20.9982	3.97958	9.83872e-29	21.233	3.29105	1.57294e-26	21.7025	3.57147	3.63326	3.10018e-30	25.5435	4.04492	1.653e-31	25.9554	3.46938	3.76721e-30	26.3645	3.71585	0.998497	0.0290702	4.27343	1.24213	0.0127708	3.80903	NS	NS	NS	NS
CGI_10025131	3.39415	3.75073	NS	3.57244	hypothetical protein CGI_10025131	1		2.78737	4.66994e-21	55.2227	3.89159	2.35173e-32	53.8924	3.5035	6.87164e-29	53.7833	3.39415	3.15166	8.68643e-38	64.3155	4.24507	1.11806e-51	63.4011	3.85547	4.50099e-48	63.1798	3.75073	NS	NS	NS	NS	NS	NS	NS	NS	NS	NS
CGI_10001988	3.14265	3.90324	NS	3.52295	c-binding -like	0.6295		3.20028	3.95272e-13	7.69873	3.24632	3.09852e-13	8.10118	2.98136	7.01091e-12	8.08936	3.14265	4.00297	4.27457e-24	14.8041	3.9709	9.96983e-25	15.4786	3.73584	3.13753e-23	15.3577	3.90324	NS	NS	NS	NS	NS	NS	NS	NS	NS	NS
CGI_10024721	3.05084	3.88811	NS	3.46948	hypothetical protein CGI_10024721	0.8467		1.84305	6.37669e-07	44.8573	4.09288	1.42242e-24	39.4517	3.21658	1.1657e-18	40.2957	3.05084	2.6043	1.52803e-21	64.3476	5.00039	3.73458e-54	59.8775	4.05965	7.25616e-49	60.4204	3.88811	-1.99365	1.11618e-06	8.86699	NS	NS	NS	NS	NS	NS	NS
CGI_10024722	2.92605	3.95682	NS	3.44144	hypothetical protein CGI_10024722	0.7133		2.15484	7.25987e-09	66.2767	3.44516	1.16097e-15	61.5084	3.17815	2.37564e-18	62.439	2.92605	2.97752	1.85769e-28	95.8226	4.83223	1.70367e-58	92.373	4.06072	1.23314e-52	92.838	3.95682	-0.91882	0.00731783	13.2544	1.09617	0.00668147	6.10786	NS	NS	NS	NS
CGI_10026939	3.30269	3.55837	NS	3.43053	phosphatidate [Pediculus humanus corporis]	0.6715		3.61763	3.72244e-19	18.094	3.01315	1.5148e-14	19.6335	3.27727	4.77768e-17	18.9305	3.30269	3.90678	1.18823e-26	19.0427	3.27083	5.12604e-23	20.5842	3.49749	5.34066e-25	19.9195	3.55837	1.52069	0.00112088	2.8515	NS	NS	NS	1.04255	0.0285886	3.38906	NS
CGI_10005016	3.28969	3.39641	NS	3.34305	hypothetical protein CGI_10005016	0.91		0.868178	0.00072636	110.351	5.11061	5.36632e-68	76.6242	3.89027	5.05825e-57	77.886	3.28969	1.00907	3.40952e-05	115.407	5.16638	2.09529e-77	82.8555	4.01377	3.62009e-68	84.0873	3.39641	NS	NS	NS	4.25562	1.80368e-37	51.0266	3.08277	4.15733e-23	52.9305	NS
CGI_10008999	3.00051	3.63254	NS	3.31653	hypothetical protein CGI_10008999	0.8133		3.30526	1.45028e-14	15.9652	2.07427	1.06782e-07	18.9749	3.62201	2.50645e-16	16.1026	3.00051	4.03371	1.47895e-27	20.0206	2.60008	3.41416e-19	23.1103	4.26383	1.0831e-29	20.2676	3.63254	NS	NS	NS	-1.09141	0.0177885	3.56671	NS	NS	NS	NS
CGI_10023180	3.75256	2.78693	NS	3.26974	Hemicentin- partial	0.837		3.8974	9.52964e-71	78.8425	3.43856	1.4322e-66	84.078	3.92171	1.79963e-71	80.4055	3.75256	2.94141	9.3372e-32	42.272	2.47009	1.06585e-25	45.9367	2.94929	3.1721e-32	43.1252	2.78693	-0.815915	0.0457509	6.27755	-1.30591	0.000424883	8.61772	NS	NS	NS	NS
CGI_10028177	3.33854	3.19463	NS	3.26658	hypothetical protein CGI_10028177	0.8205		2.57871	1.26714e-18	19.95	3.86222	2.39798e-27	18.9968	3.57469	9.55418e-26	18.9001	3.33854	2.49792	5.95632e-14	20.7324	3.66677	1.523e-24	19.8402	3.4192	8.40919e-23	19.7521	3.19463	NS	NS	NS	NS	NS	NS	NS	NS	NS	NS
CGI_10009959	3.94407	2.39936	NS	3.17172	disintegrin and metallo ase domain-containing 10-like	0.9575		4.34399	2.09595e-48	42.9531	2.9964	3.41972e-39	48.243	4.49183	1.41078e-49	43.7114	3.94407	2.81702	2.95427e-16	15.1168	1.441	2.62836e-06	19.1702	2.94006	5.50452e-18	15.3208	2.39936	NS	NS	NS	-1.59364	0.000242002	5.84603	NS	NS	NS	NS
CGI_10019347	2.91364	3.39673	NS	3.15518	DNA polymerase III polC-type	0.694		2.8258	1.55698e-18	16.4516	2.94904	1.00151e-19	17.0379	2.96608	8.98749e-20	16.6204	2.91364	3.32989	1.30801e-20	31.3875	3.40562	9.48646e-22	32.5545	3.45466	9.55394e-23	31.8902	3.39673	NS	NS	NS	NS	NS	NS	NS	NS	NS	NS
CGI_10027198	3.19197	3.02462	NS	3.10829	hypothetical protein CGI_10027198	0.93		3.27556	1.49545e-49	91.8551	4.02392	9.59322e-72	92.3598	2.27643	8.8424e-23	102.063	3.19197	3.13429	1.88924e-63	78.4733	3.84573	4.32199e-82	78.4452	2.09383	1.28208e-23	88.2802	3.02462	-0.730564	0.0398492	11.6814	NS	NS	NS	-1.67464	1.11232e-07	20.4471	NS
CGI_10002616	3.63183	2.56925	NS	3.10054	fibropellin-1- partial	0.7335		3.89267	1.25317e-104	501.288	4.22944	1.3247e-31	504.889	2.77338	9.60705e-41	545.568	3.63183	2.80168	1.67108e-70	232.758	3.23016	2.1659e-20	225.906	1.6759	8.38589e-18	271.169	2.56925	1.47685	7.47009e-18	112.681	2.31262	1.00803e-12	100.15	NS	NS	NS	NS
CGI_10000705	2.90054	3.12891	NS	3.01473	serine arginine repetitive matrix 1-like	0.6235		2.16807	6.8563e-14	21.4899	3.03797	2.66946e-22	20.5311	3.49559	2.54061e-24	19.4691	2.90054	2.47649	4.52128e-14	29.1361	3.2667	7.12613e-23	28.5187	3.64354	2.84887e-25	27.366	3.12891	NS	NS	NS	NS	NS	NS	NS	NS	NS	NS
CGI_10015409	3.1416	2.78717	NS	2.96438	hypothetical protein CGI_10015409	0.985		3.16829	7.30538e-13	7.37836	3.33892	1.36348e-13	7.67736	2.91759	2.62456e-11	7.77064	3.1416	2.87416	2.75558e-11	5.47632	2.93768	6.80719e-12	5.69451	2.54966	1.11571e-09	5.83228	2.78717	NS	NS	NS	NS	NS	NS	NS	NS	NS	NS
CGI_10002837	2.55649	3.20943	NS	2.88296	GTPase IMAP family member 4-like	0.7595		2.46052	1.08671e-34	75.4762	1.15654	2.52024e-06	96.0179	4.05241	2.05833e-62	69.2107	2.55649	3.14114	1.99749e-38	124.231	1.88443	4.11809e-13	146.191	4.60271	1.23104e-65	119.246	3.20943	-1.61297	1.12677e-05	13.698	-2.75608	1.21091e-15	32.1877	NS	NS	NS	NS
CGI_10007622	3.19151	2.36192	NS	2.77671	Protein YNG1	0.55		3.34842	5.12914e-15	9.88457	2.99787	4.73557e-13	10.6903	3.22823	3.80686e-14	10.2558	3.19151	2.57638	3.4851e-09	5.05978	2.13869	4.06615e-07	5.64981	2.37068	3.03969e-08	5.33119	2.36192	1.23649	0.0094096	1.6051	NS	NS	NS	1.0722	0.034527	1.80731	NS
CGI_10020759	2.96448	2.54903	NS	2.75676	Vacuolar sorting-associated 13C	0.694		2.6656	5.87755e-10	6.10033	3.06786	6.86454e-12	6.17363	3.15999	2.5451e-12	5.96667	2.96448	2.32856	9.30632e-08	5.45154	2.62117	1.60776e-09	5.49644	2.69736	5.49152e-10	5.31926	2.54903	NS	NS	NS	NS	NS	NS	NS	NS	NS	NS
CGI_10016966	2.84533	2.45642	NS	2.65088	Tyrosine- phosphatase Lar	0.7225		3.40804	2.23962e-15	11.5165	1.59431	4.50473e-05	14.9327	3.53364	5.57072e-16	11.7644	2.84533	3.0787	2.0301e-13	7.92763	1.18316	0.00181213	11.1134	3.1074	6.23374e-14	8.11086	2.45642	NS	NS	NS	-2.16193	4.05923e-06	3.10655	NS	NS	NS	NS
CGI_10004783	2.87003	2.25551	NS	2.56277	hypothetical protein CGI_10004783	1		2.41768	5.61597e-19	80.0411	1.9472	1.66052e-16	88.882	4.24519	2.36064e-47	73.0617	2.87003	1.84758	2.74801e-09	57.0679	1.38415	9.98242e-07	64.8339	3.53481	3.67374e-28	49.9005	2.25551	NS	NS	NS	-0.898523	0.000789387	26.1288	1.51214	1.3614e-05	11.1489	NS
CGI_10018168	2.84454	2.27865	NS	2.56159	hypothetical protein CGI_10018168	0.81		2.69339	1.67366e-15	22.5836	3.09931	1.58853e-20	22.9175	2.74093	1.01971e-18	23.2013	2.84454	2.16548	5.31699e-11	14.8644	2.51457	9.05984e-15	14.9003	2.15589	1.10901e-12	15.3439	2.27865	NS	NS	NS	NS	NS	NS	NS	NS	NS	NS
CGI_10018161	2.22111	2.87037	NS	2.54574	multiple epidermal growth factor-like domains 10	0.787		1.76114	1.33799e-05	8.3617	2.52431	2.88764e-09	7.82135	2.3779	1.83426e-08	7.80707	2.22111	2.4546	8.51075e-13	12.6981	3.14148	1.11612e-17	12.3485	3.01503	9.15414e-17	12.2671	2.87037	NS	NS	NS	1.05297	0.0354736	2.67987	NS	NS	NS	NS
CGI_10014002	2.84731	2.22361	NS	2.53546	Beta-hexosaminidase subunit alpha	0.5753		2.19338	5.03835e-30	118.896	3.58776	4.01457e-61	110.171	2.76079	2.12176e-37	114.045	2.84731	1.58268	4.61344e-15	81.6009	2.94934	1.09409e-39	71.6939	2.13881	1.31685e-21	76.2469	2.22361	-0.572872	0.0121701	33.9536	0.835261	0.0013331	21.4407	NS	NS	NS	NS
CGI_10009669	2.68867	2.30379	NS	2.49623	hypothetical protein CGI_10009669	0.684		1.64042	3.20553e-15	49.5622	3.30808	4.37544e-34	42.7405	3.11751	6.0832e-32	42.4404	2.68867	1.27323	1.14784e-09	39.6074	2.90956	3.72151e-27	32.6107	2.72859	3.92858e-25	32.5595	2.30379	-1.01276	0.000138188	17.149	NS	NS	NS	NS	NS	NS	NS
CGI_10018623	2.77009	2.16266	NS	2.46638	hypothetical protein CGI_10018623	1		2.17777	6.94071e-36	91.1152	2.46274	3.53165e-39	91.8285	3.66977	6.51513e-64	82.1874	2.77009	1.60945	9.77515e-12	66.3589	1.86591	3.70129e-14	66.0978	3.01263	4.6712e-30	57.2643	2.16266	-1.82455	3.32514e-12	19.9761	-1.53454	7.95037e-08	17.7195	NS	NS	NS	NS
CGI_10012932	2.47155	2.43726	NS	2.4544	hypothetical protein CGI_10012932	0.6485		1.30702	0.00015042	16.488	3.48364	2.50457e-17	13.099	2.62398	2.14864e-12	13.7489	2.47155	1.31738	4.28051e-05	16.1147	3.40016	7.8634e-19	12.8092	2.59423	1.1769e-13	13.474	2.43726	-1.26898	0.00293951	5.59896	NS	NS	NS	NS	NS	NS	NS
CGI_10019629	3.00359	1.87852	NS	2.44106	multiple epidermal growth factor-like domains 10	0.639		3.08101	3.01176e-78	144.002	2.05874	8.96693e-77	167.084	3.87104	2.57921e-137	140.885	3.00359	1.95377	2.89487e-18	72.9362	0.95022	3.69815e-08	92.6629	2.73158	2.17093e-43	68.6221	1.87852	NS	NS	NS	-0.730915	0.000500666	51.7337	1.06171	1.46854e-05	27.1913	NS
CGI_10012951	2.6968	2.14109	NS	2.41894	NADH dehydrogenase [ubiquinone] 1 alpha subcomplex subunit 7	0.666		2.68617	3.75666e-38	63.1887	2.6592	2.70352e-43	66.1455	2.74503	7.24855e-42	64.2927	2.6968	2.13395	8.58987e-18	45.5235	2.10406	3.29514e-20	47.7175	2.18525	6.90482e-20	46.3361	2.14109	NS	NS	NS	NS	NS	NS	NS	NS	NS	NS
CGI_10025964	2.24578	2.51539	NS	2.38059	hemolymph lipopolysaccharide-binding -like [Crassostrea gigas]	0.6667		2.25771	7.87098e-09	11.504	2.61907	9.89241e-11	11.56	1.86056	7.6072e-07	12.597	2.24578	2.55301	8.8692e-14	12.7099	2.87744	3.24007e-16	12.8164	2.11573	2.98976e-11	13.8202	2.51539	NS	NS	NS	1.12036	0.0173976	3.85727	NS	NS	NS	NS
CGI_10021130	2.13081	2.55465	NS	2.34273	hypothetical protein CGI_10021130	1		1.84271	6.38909e-06	10.1783	1.94163	1.52268e-06	10.545	2.60808	1.52713e-09	9.36804	2.13081	2.29292	5.93686e-11	12.7006	2.3492	6.70593e-12	13.1568	3.02182	7.92448e-16	11.9845	2.55465	NS	NS	NS	NS	NS	NS	NS	NS	NS	NS
CGI_10002323	1.90606	2.72672	NS	2.31639	hypothetical protein CGI_10002323	0.9233		1.79938	0.000166439	2.54511	1.90167	0.000102244	2.61855	2.01713	3.49002e-05	2.50768	1.90606	2.66188	4.01277e-10	6.00064	2.71622	1.3927e-10	6.20942	2.80206	3.72713e-11	6.04304	2.72672	NS	NS	NS	NS	NS	NS	NS	NS	NS	NS
CGI_10000931	2.56472	2.02275	NS	2.29374	hypothetical protein CGI_10000931	0.975		2.09714	2.36826e-07	22.2105	2.30598	1.0007e-13	23.5014	3.29104	5.74026e-21	21.059	2.56472	1.60269	0.000151838	15.679	1.76106	8.0058e-08	16.6848	2.70452	3.85676e-14	14.4592	2.02275	NS	NS	NS	NS	NS	NS	NS	NS	NS	NS
CGI_10014402	2.08301	2.50178	NS	2.2924	[Nematostella vectensis]	0.6505		1.24856	0.000198271	10.7962	3.12624	2.51934e-14	8.57568	1.87424	1.92124e-07	9.77733	2.08301	1.80945	5.37382e-07	16.4702	3.37359	1.12042e-17	14.531	2.3223	4.14857e-10	15.6063	2.50178	NS	NS	NS	1.04099	0.0416569	1.80715	NS	NS	NS	NS
CGI_10005119	2.886	1.66996	NS	2.27798	hypothetical protein CGI_10005119	0.6457		2.38364	5.55235e-12	13.873	3.20323	6.6691e-17	13.3973	3.07112	5.74668e-16	13.2384	2.886	1.25127	0.00315081	6.80398	1.93713	6.71587e-06	6.06769	1.82149	2.25479e-05	6.05917	1.66996	NS	NS	NS	NS	NS	NS	NS	NS	NS	NS
CGI_10027603	1.51699	2.9347	NS	2.22585	mediator of DNA damage checkpoint 1-like isoform X1	0.7067		1.20528	8.28359e-05	18.7972	1.63069	7.56319e-07	17.8763	1.71499	1.09258e-07	17.3645	1.51699	2.6355	3.30526e-28	42.9627	3.04152	6.29678e-32	43.0481	3.12709	9.45451e-34	42.1376	2.9347	NS	NS	NS	NS	NS	NS	NS	NS	NS	NS
CGI_10026614	1.7496	2.6882	NS	2.2189	hemolymph lipopolysaccharide-binding -like [Crassostrea gigas]	0.701		1.52971	2.03185e-09	30.319	2.3657	7.07161e-19	27.9685	1.35338	1.38596e-07	31.9675	1.7496	2.4808	5.15528e-32	51.364	3.29009	2.15201e-46	49.9439	2.29372	5.45024e-28	53.4808	2.6882	NS	NS	NS	NS	NS	NS	NS	NS	NS	NS
CGI_10012594	2.17731	2.22153	NS	2.19942	hypothetical protein CGI_10012594	0.9467		2.59702	1.48525e-11	31.8795	2.32717	4.77553e-10	34.4343	1.60773	1.69192e-05	37.4042	2.17731	2.71077	4.27681e-17	28.4304	2.35703	5.43009e-15	30.7673	1.59681	4.71194e-08	33.7712	2.22153	NS	NS	NS	NS	NS	NS	-1.08584	0.000896173	11.0792	NS
CGI_10000753	2.14057	2.25525	NS	2.19791	Histone acetyltransferase MYST2	0.609		2.06023	1.33299e-09	10.643	0.882404	0.00203641	14.2086	3.47907	4.81946e-17	9.36728	2.14057	2.21068	3.20088e-10	12.4141	1.121	0.000185327	15.9651	3.43406	3.44581e-18	11.2318	2.25525	NS	NS	NS	-1.87069	4.79322e-06	5.76837	NS	NS	NS	NS
CGI_10005942	2.33948	2.03775	NS	2.18862	hypothetical protein CGI_10005942	1		2.52764	4.80333e-15	32.3725	1.24782	8.73537e-06	41.489	3.24299	1.92846e-22	31.3178	2.33948	2.25061	5.75148e-14	25.1635	0.921336	0.000338471	33.7812	2.9413	1.33033e-21	24.0263	2.03775	NS	NS	NS	-0.982316	0.000745122	17.3652	1.14254	0.00316627	7.41778	NS
CGI_10011841	2.41169	1.927	NS	2.16935	neuronal acetylcholine receptor subunit alpha-6-like isoform X1	1		2.88394	5.43674e-11	5.72781	3.03675	1.31208e-11	5.94887	1.31439	0.000600179	7.64232	2.41169	2.38388	8.07077e-08	4.4641	2.44799	2.75583e-08	4.63241	0.949118	0.0255664	6.31151	1.927	1.13418	0.0165858	1.55472	1.22861	0.0113422	1.60847	NS	NS	NS	NS
CGI_10024977	2.44471	1.79651	NS	2.12061	Cytosolic Fe-S cluster assembly factor NBP35	0.7925		2.70352	5.2313e-21	24.1306	1.7884	2.35548e-08	27.8067	2.8422	2.58251e-24	24.4557	2.44471	2.04214	6.24622e-10	16.3176	1.16502	0.00183645	19.5944	2.18236	1.37914e-12	16.5032	1.79651	NS	NS	NS	NS	NS	NS	0.912221	0.0202417	7.84531	NS
CGI_10025430	2.65554	1.58252	NS	2.11903	carbohydrate sulfotransferase 15-like	0.6295		2.31983	5.74057e-08	6.4512	3.20182	1.7062e-12	6.2049	2.44496	1.06745e-08	6.56308	2.65554	1.30331	0.00654595	3.14363	2.0519	6.41767e-06	2.77247	1.39235	0.00268235	3.19138	1.58252	NS	NS	NS	0.942771	0.0407843	0.812977	NS	NS	NS	NS
CGI_10021426	2.68863	1.54247	NS	2.11555	OTU domain containin	0.61		2.35537	1.1739e-08	6.07403	2.93979	2.06567e-11	5.9692	2.77073	1.57259e-10	5.91118	2.68863	1.26751	0.0077065	2.85651	1.74525	0.00015811	2.62925	1.61464	0.000458671	2.64014	1.54247	NS	NS	NS	NS	NS	NS	NS	NS	NS	NS
CGI_10024429	2.78751	1.42992	NS	2.10871	hypothetical protein CGI_10024429	1		2.53278	8.7288e-11	10.0186	3.06528	1.59521e-13	9.97461	2.76447	5.92388e-12	10.0347	2.78751	1.23704	0.00772512	3.9781	1.64911	0.000328143	3.70073	1.40361	0.00209955	3.88456	1.42992	NS	NS	NS	1.22725	0.0126552	2.37968	NS	NS	NS	NS
CGI_10015469	2.85366	1.29673	NS	2.0752	atrial natriuretic peptide receptor 1	0.607		2.99833	3.75274e-26	38.3006	2.65997	1.3958e-24	41.242	2.90268	2.41986e-25	39.4842	2.85366	1.46797	9.95812e-07	13.5697	1.07644	0.000112599	15.4755	1.34579	5.32141e-06	14.2676	1.29673	NS	NS	NS	NS	NS	NS	NS	NS	NS	NS
CGI_10018279	1.78479	2.36081	NS	2.0728	hypothetical protein CGI_10018279	0.9933		0.609141	0.025839	151.222	3.44328	2.96755e-77	104.278	1.30196	1.5056e-07	130.057	1.78479	1.20659	2.67476e-06	199.706	3.98879	2.20457e-86	156.023	1.88706	1.38108e-14	180.395	2.36081	NS	NS	NS	3.12474	6.3179e-28	103.418	1.1842	0.000219113	130.056	NS
CGI_10009503	1.78317	2.28093	NS	2.03205	Blastula protease 10	0.975		1.93866	5.16952e-07	15.4485	1.43956	0.000209848	17.6558	1.9713	7.26565e-08	15.9134	1.78317	2.46003	2.49931e-13	20.7135	1.92133	5.02987e-09	23.0837	2.46143	5.49544e-15	21.3011	2.28093	NS	NS	NS	-1.04061	0.0221103	5.59481	NS	NS	NS	NS
CGI_10027008	1.84952	2.19362	NS	2.02157	hypothetical protein CGI_10027008	0.7533		1.91809	3.20034e-05	4.70786	1.97627	2.06754e-05	4.94107	1.65421	0.000395624	5.09876	1.84952	2.28415	9.92637e-08	6.55308	2.29173	5.39007e-08	6.85774	2.00496	1.84885e-06	6.98011	2.19362	NS	NS	NS	NS	NS	NS	NS	NS	NS	NS
CGI_10009782	2.29283	1.73569	NS	2.01426	hypothetical protein CGI_10009782	0.6633		2.28486	9.02558e-11	13.0408	1.5657	1.9765e-07	15.4117	3.02792	6.80679e-16	12.3912	2.29283	1.73309	9.30219e-06	9.39231	1.05757	0.0021715	11.5655	2.41641	5.54681e-10	8.70619	1.73569	-1.31194	0.00415242	1.65534	-2.5176	3.92481e-08	3.6151	NS	NS	NS	NS
CGI_10022217	2.345	1.67153	NS	2.00826	hypothetical protein CGI_10022217	0.69		2.61936	1.74734e-44	165.461	3.13217	8.22133e-67	165.518	1.28346	2.298e-10	204.837	2.345	1.93829	3.62113e-15	111.828	2.41387	6.34852e-24	109.779	0.662439	0.0140711	149.175	1.67153	0.997743	1.87833e-06	67.6187	1.49538	2.01458e-14	63.4694	NS	NS	NS	NS
CGI_10027315	2.37793	1.62084	NS	1.99939	hemicentin-2-like isoform X3 [Crassostrea gigas]	0.7245		3.12299	3.38919e-99	1037.55	2.13987	4.60938e-38	1185.22	1.87092	8.48267e-53	1211.29	2.37793	2.33475	1.03955e-25	659.235	1.39538	2.88342e-09	788.183	1.13239	1.15283e-07	821.374	1.62084	NS	NS	NS	-1.19072	6.61111e-12	307.179	-1.51453	2.60356e-38	351.233	NS
CGI_10004324	2.6611	1.33739	NS	1.99925	short-chain collagen C4-like	0.9185		3.18954	2.27982e-75	102.357	2.47767	9.75171e-61	113.347	2.31609	6.38738e-14	110.045	2.6611	1.82998	1.46216e-19	43.9026	1.11196	9.3071e-10	52.3268	1.07023	0.00175657	50.2851	1.33739	0.993183	9.86607e-05	29.6671	NS	NS	NS	NS	NS	NS	NS
CGI_10013867	2.08466	1.91144	NS	1.99805	[Nematostella vectensis]	0.6494		1.74983	1.11697e-05	6.53559	2.54416	2.61947e-09	6.07911	1.95998	1.57419e-06	6.45081	2.08466	1.62769	7.21426e-05	6.26182	2.3117	3.3412e-08	5.80881	1.79492	1.13408e-05	6.18477	1.91144	NS	NS	NS	NS	NS	NS	NS	NS	NS	NS
CGI_10005838	1.72249	2.2725	NS	1.9975	Protocadherin Fat 4	0.7925		1.71864	2.71681e-07	14.659	1.62692	1.13754e-06	15.5183	1.82193	9.28218e-09	14.8284	1.72249	2.28138	8.12851e-15	20.2725	2.17085	5.78103e-14	21.3442	2.36527	3.30338e-17	20.5847	2.2725	NS	NS	NS	NS	NS	NS	NS	NS	NS	NS
CGI_10008237	2.0894	1.87343	NS	1.98141	multiple epidermal growth factor-like domains 10 [Crassostrea gigas]	0.6865		1.09484	1.30309e-10	153.49	2.17793	3.45184e-65	133.197	2.99542	6.71976e-92	120.319	2.0894	0.905877	1.55997e-05	137.762	1.95742	3.06686e-30	117.492	2.757	1.4673e-50	105.355	1.87343	NS	NS	NS	0.584078	0.0183438	61.3599	1.3759	1.30791e-08	49.6558	NS
CGI_10007900	1.60754	2.318	NS	1.96277	hypothetical protein CGI_10007900	0.7788		1.83003	5.41791e-11	31.5568	1.54661	1.97473e-10	34.8113	1.44599	3.83868e-10	34.8215	1.60754	2.51557	1.25372e-17	50.8799	2.25954	1.33937e-17	54.8377	2.17888	8.10171e-18	54.5022	2.318	NS	NS	NS	NS	NS	NS	NS	NS	NS	NS
CGI_10016045	1.7338	2.18652	NS	1.96016	hypothetical protein CGI_10016045	0.922		1.71417	0.000374535	2.36405	1.83707	0.000187519	2.43133	1.65016	0.000836869	2.45547	1.7338	2.19505	7.48772e-07	3.91829	2.261	2.74599e-07	4.04787	2.1035	1.63293e-06	4.04831	2.18652	NS	NS	NS	NS	NS	NS	NS	NS	NS	NS
CGI_10025554	1.81299	2.10004	NS	1.95651	hypothetical protein CGI_10025554	0.756		1.37328	0.000737923	8.20849	2.5514	2.16678e-09	7.13877	1.51428	0.00038016	8.16075	1.81299	1.73604	1.69431e-05	11.2069	2.74296	1.55804e-11	10.2924	1.82113	9.25492e-06	11.239	2.10004	NS	NS	NS	NS	NS	NS	NS	NS	NS	NS
CGI_10025314	1.9513	1.92282	NS	1.93706	scavenger receptor class F member 2-like	0.95		1.32083	7.39014e-08	52.2116	2.57303	3.22815e-26	45.2711	1.96004	8.72544e-17	47.8769	1.9513	1.2919	2.14807e-09	49.6753	2.54002	8.76028e-33	42.8477	1.93655	1.62039e-21	45.4955	1.92282	-0.945251	0.0012932	21.5039	NS	NS	NS	NS	NS	NS	NS
CGI_10006886	2.07412	1.75928	NS	1.9167	sperm receptor for egg jelly-like	0.4555		1.66218	6.34712e-21	104.004	2.13268	6.82703e-29	100.793	2.4275	2.29573e-33	95.5489	2.07412	1.36439	1.51043e-10	87.4476	1.81444	4.56156e-16	83.7631	2.09902	1.46863e-19	79.042	1.75928	-1.446	5.00306e-12	33.1161	-0.967185	6.32886e-05	26.8826	-0.653802	0.0147952	22.9419	-1.02233
CGI_10014690	1.94225	1.89028	NS	1.91627	caspase-7-like isoform X1 [Crassostrea gigas]	0.6195		2.16565	9.11014e-26	82.1651	0.847939	2.21864e-05	109.427	2.81317	3.48177e-24	77.5352	1.94225	2.12458	8.95497e-39	75.7963	0.770981	6.38759e-07	102.134	2.77528	3.05549e-31	71.2681	1.89028	1.38391	2.11478e-07	55.4962	NS	NS	NS	2.02178	5.62108e-10	50.1538	NS
CGI_10023138	2.17482	1.65331	NS	1.91406	hypothetical protein CGI_10023138	0.865		1.91721	5.02372e-05	2.86454	2.32609	1.53995e-06	2.811	2.28116	2.28527e-06	2.75598	2.17482	1.49802	0.00159107	2.27926	1.74452	0.000147805	2.20343	1.71738	0.000168429	2.16695	1.65331	NS	NS	NS	NS	NS	NS	NS	NS	NS	NS
CGI_10020253	1.92518	1.90112	NS	1.91315	Multiple epidermal growth factor-like domains 10	0.745		1.03932	3.59336e-14	619.796	3.58867	5.56939e-171	470.793	1.14755	2.18959e-05	607.658	1.92518	1.0118	3.76753e-21	593.405	3.57993	0	447.607	1.11162	1.4823e-05	581.813	1.90112	-0.528215	0.019335	344.934	1.92886	5.86469e-22	180.188	NS	NS	NS	NS
CGI_10005043	1.97382	1.85211	NS	1.91296	hypothetical protein CGI_10005043	0.8765		0.852627	0.00809848	14.9796	1.80394	1.78779e-06	12.5468	3.26488	1.3992e-15	10.4913	1.97382	0.790131	0.0155949	14.0865	1.69077	5.06646e-06	11.6947	3.07543	3.29631e-15	9.7192	1.85211	-2.64093	8.04259e-10	5.30459	-1.49734	0.00210014	2.40596	NS	NS	NS	NS
CGI_10020487	1.5197	2.28576	NS	1.90273	guanylate cyclase soluble subunit beta-2-like	1		1.26091	0.00774906	3.33575	1.57136	0.000980525	3.25042	1.72684	0.000338121	3.03896	1.5197	2.07137	3.90651e-07	6.20524	2.32601	1.19635e-08	6.23853	2.4599	2.93257e-09	5.98786	2.28576	NS	NS	NS	NS	NS	NS	NS	NS	NS	NS
CGI_10011228	1.83837	1.94399	NS	1.89118	short-chain collagen C4-like	0.791		1.01864	0.000258697	352.152	3.02059	2.79845e-27	275.444	1.47586	3.03124e-08	326.61	1.83837	1.09469	2.12988e-08	347.962	3.17181	5.40761e-53	273.305	1.56548	4.919e-17	323.53	1.94399	NS	NS	NS	1.69794	5.80568e-15	113.052	NS	NS	NS	NS
CGI_10011138	2.60844	1.12301	NS	1.86573	Alpha-2C adrenergic receptor	0.7554		2.51798	3.52596e-23	904.215	2.05559	3.50737e-49	1010.46	3.25176	7.14194e-140	884.353	2.60844	1.10019	0.000100042	378.861	0.547682	0.00412655	461.902	1.72115	8.31279e-25	349.541	1.12301	-0.663581	0.0245317	190.823	-1.35476	7.93428e-20	270.042	NS	NS	NS	NS
CGI_10010675	2.63283	1.05437	NS	1.8436	hypothetical protein CGI_10010675	0.99		2.67424	2.31432e-12	8.97779	2.64049	2.64957e-12	9.45819	2.58377	8.08608e-12	9.33476	2.63283	1.13254	0.0172076	3.05565	1.03984	0.0290181	3.29046	0.990723	0.0364564	3.29148	1.05437	NS	NS	NS	NS	NS	NS	NS	NS	NS	NS
CGI_10012963	2.16482	1.4843	NS	1.82456	hypothetical protein CGI_10012963	0.61		2.17048	4.27322e-77	468.833	2.90302	1.2581e-95	452.179	1.42095	1.53164e-31	537.806	2.16482	1.49103	4.71557e-30	315.068	2.21453	2.2403e-48	292.969	0.747342	5.67187e-08	379.565	1.4843	0.328424	0.00983969	193.003	1.067	1.97744e-13	164.191	-0.419364	0.0011434	257.782	0.325355
CGI_10025049	1.81692	1.8001	NS	1.80851	hypothetical protein CGI_10025049	0.89		1.98199	8.70677e-07	11.8557	2.45325	3.57372e-10	11.8404	1.01553	0.00416348	15.0661	1.81692	1.99485	1.2628e-07	11.2641	2.41168	3.3511e-11	11.231	0.993765	0.00227669	14.3933	1.8001	NS	NS	NS	NS	NS	NS	NS	NS	NS	NS
CGI_10028624	1.79015	1.80271	NS	1.79643	hypothetical protein CGI_10028624	0.8565		1.38786	0.00383911	3.1359	2.15891	8.2077e-06	2.78525	1.82367	0.000163984	2.91075	1.79015	1.46628	0.00146656	3.37895	2.1146	2.69454e-06	3.04867	1.82724	4.96915e-05	3.1708	1.80271	NS	NS	NS	1.06412	0.0301931	1.11508	NS	NS	NS	NS
CGI_10020794	1.48107	2.09402	NS	1.78755	Scavenger receptor class F member 2	0.717		1.41403	0.000772428	6.87268	1.57523	9.25015e-05	7.0362	1.45396	0.000451321	7.01117	1.48107	2.03415	2.07022e-07	11.1499	2.18373	5.12173e-09	11.4813	2.06417	5.80252e-08	11.3822	2.09402	NS	NS	NS	NS	NS	NS	NS	NS	NS	NS
CGI_10027435	1.38858	2.18359	NS	1.78609	hypothetical protein CGI_10027435	1		1.63953	0.000709486	2.85596	1.3912	0.00556784	3.23253	1.13501	0.0249202	3.3861	1.38858	2.4263	2.05031e-08	5.98588	2.1762	3.61383e-07	6.48174	1.94829	3.81172e-06	6.57769	2.18359	NS	NS	NS	NS	NS	NS	NS	NS	NS	NS
CGI_10014694	2.12189	1.42408	NS	1.77299	hypothetical protein CGI_10014694	0.7575		1.58637	1.74775e-05	9.68343	3.04676	2.69602e-13	8.32547	1.73253	1.42476e-06	9.69838	2.12189	0.935371	0.0292435	6.48845	2.27954	8.65217e-08	5.04129	1.05734	0.0089632	6.44504	1.42408	NS	NS	NS	NS	NS	NS	NS	NS	NS	NS
CGI_10014983	2.36087	1.16412	NS	1.7625	protocadherin Fat 3-like	0.6665		2.00881	7.84082e-17	37.4785	2.39321	4.26249e-25	37.3575	2.68059	4.90852e-27	35.4354	2.36087	0.833162	0.00867603	19.3522	1.18652	3.58912e-05	18.5407	1.47269	1.0205e-06	17.0441	1.16412	NS	NS	NS	NS	NS	NS	0.865535	0.00562121	12.549	NS
CGI_10002156	1.41215	2.06477	NS	1.73846	tigger transposable element-derived 4-like	0.8378		1.26489	0.00240871	5.37571	0.816748	0.0452032	6.36247	2.1548	1.17167e-06	4.59043	1.41215	1.94872	2.84522e-07	8.79501	1.5386	1.67172e-05	9.89438	2.70699	1.09699e-11	8.10972	2.06477	NS	NS	NS	-1.25773	0.0094965	2.63266	NS	NS	NS	NS
CGI_10004084	1.7992	1.64405	NS	1.72163	hypothetical protein CGI_10004084	0.6415		2.05456	1.55995e-05	2.46963	2.04916	2.7986e-05	2.65951	1.29388	0.00907216	3.11841	1.7992	1.90846	3.33163e-05	2.3762	1.84001	6.41756e-05	2.55965	1.18369	0.0125936	3.01173	1.64405	1.4409	0.00196004	1.58646	1.42188	0.00349952	1.74006	NS	NS	NS	NS
CGI_10019200	1.35048	2.07464	NS	1.71256	hypothetical protein CGI_10019200	0.6085		0.796772	6.32449e-07	99.2845	2.02791	2.09225e-38	81.4187	1.22677	9.47385e-14	91.5806	1.35048	1.53543	1.62631e-17	141.321	2.73449	4.03794e-51	125.701	1.95402	5.94922e-26	134.937	2.07464	-1.64865	3.84876e-14	47.6784	NS	NS	NS	-1.22666	1.71352e-07	38.6838	NS
CGI_10025553	1.85686	1.4907	NS	1.67378	hypothetical protein CGI_10025553	0.85		1.55915	0.00140202	2.68358	2.09275	2.01744e-05	2.50911	1.91869	9.70377e-05	2.54945	1.85686	1.28777	0.00784543	2.3901	1.64319	0.000347949	2.20987	1.54114	0.000885249	2.25958	1.4907	NS	NS	NS	NS	NS	NS	NS	NS	NS	NS
CGI_10021340	2.22822	1.11168	NS	1.66995	hypothetical protein CGI_10021340	0.803		2.44706	2.46241e-75	244.871	2.77875	9.48055e-66	246.393	1.45883	9.36499e-36	288.517	2.22822	1.33082	6.51227e-18	128.171	1.65727	1.0814e-19	125.105	0.346954	0.0217375	168.506	1.11168	0.982117	2.99801e-06	114.834	1.30864	1.15145e-08	110.754	NS	NS	NS	NS
CGI_10027202	2.10876	1.22086	NS	1.66481	BTB POZ domain-containing KCTD14	0.525		2.01041	2.05931e-05	3.59068	2.18088	5.35886e-06	3.73667	2.13501	8.23472e-06	3.677	2.10876	1.17928	0.0156091	1.57386	1.25642	0.00938505	1.63458	1.22686	0.0104267	1.6185	1.22086	NS	NS	NS	NS	NS	NS	NS	NS	NS	NS
CGI_10005863	1.76885	1.53474	NS	1.65179	MAM domain-containing glycosylphosphatidylinositol anchor 1-like	0.6605		1.95005	2.45484e-52	179.338	1.55503	7.6529e-31	198.878	1.80146	1.30714e-38	187.126	1.76885	1.7146	1.69495e-23	156.198	1.32207	5.49571e-14	174.428	1.56754	1.055e-18	163.525	1.53474	-0.806539	1.11064e-05	57.5708	-1.19611	6.55419e-11	72.5059	-0.943977	1.05846e-06	62.962	-0.98221
CGI_10019728	1.70007	1.60289	NS	1.65148	tetraspanin-1-like [Crassostrea gigas]	0.6447		2.10239	1.80225e-71	430.224	2.24572	9.46779e-44	438.263	0.752095	8.49458e-08	568.15	1.70007	2.004	9.57467e-51	399.49	2.13905	4.73472e-36	406.313	0.665635	1.60815e-05	533.71	1.60289	-0.532432	0.000128064	137.31	NS	NS	NS	-1.86281	5.10212e-38	272.366	NS
CGI_10020385	1.48632	1.7949	NS	1.64061	hypothetical protein CGI_10020385	1		1.4249	0.00324128	1.23348	1.53535	0.00211721	1.28345	1.49871	0.00260517	1.2593	1.48632	1.77115	0.000123419	2.3094	1.82061	7.23177e-05	2.39936	1.79293	8.36699e-05	2.3583	1.7949	NS	NS	NS	NS	NS	NS	NS	NS	NS	NS
CGI_10018895	1.71573	1.55968	NS	1.6377	hypothetical protein CGI_10018895	1		1.75761	5.27655e-25	87.1839	2.48976	2.06033e-19	81.2285	0.899807	6.31872e-08	105.925	1.71573	1.60763	2.96462e-15	79.5944	2.30235	1.50953e-15	73.532	0.769072	0.000123925	97.7748	1.55968	0.753912	6.10858e-05	53.5314	1.51918	3.08602e-07	45.938	NS	NS	NS	NS
CGI_10024832	1.5732	1.70139	NS	1.6373	PREDICTED: uncharacterized protein LOC105331530	0.8283		1.70995	2.41654e-07	20.164	1.51273	2.16118e-06	21.886	1.49692	3.46288e-06	21.5252	1.5732	1.85025	4.40763e-10	20.9945	1.63191	6.65001e-09	22.7203	1.62202	1.04079e-08	22.3597	1.70139	NS	NS	NS	NS	NS	NS	NS	NS	NS	NS
CGI_10017530	1.29764	1.94638	NS	1.62201	hypothetical protein CGI_10017530	0.94		0.946994	0.000852379	49.8513	1.80576	7.65813e-13	44.098	1.14016	4.07242e-06	49.0638	1.29764	1.58486	5.22233e-12	67.833	2.46173	6.97981e-33	62.9722	1.79254	8.71297e-20	67.5118	1.94638	NS	NS	NS	NS	NS	NS	NS	NS	NS	NS
CGI_10006821	1.6901	1.55083	NS	1.62046	hypothetical protein CGI_10006821	0.845		1.43994	0.00302432	3.01346	2.02381	3.73638e-05	2.77119	1.60654	0.00114019	2.97333	1.6901	1.35316	0.0043948	2.77813	1.83262	6.92722e-05	2.53397	1.46672	0.00165772	2.73741	1.55083	NS	NS	NS	NS	NS	NS	NS	NS	NS	NS
CGI_10004037	1.52963	1.69361	NS	1.61162	Hepatocyte growth factor	0.5955		1.95079	6.07453e-17	45.8181	1.61837	1.01102e-15	50.6264	1.01974	3.24744e-07	56.0679	1.52963	2.11061	5.79899e-20	49.4646	1.77838	7.92913e-19	54.3361	1.19185	1.5196e-09	59.6123	1.69361	NS	NS	NS	NS	NS	NS	-0.764821	0.000403938	29.1651	NS
CGI_10018999	1.47311	1.70246	NS	1.58779	PREDICTED: uncharacterized protein LOC105322229 [Crassostrea gigas]	0.717		2.65022	1.82072e-118	272.816	0.923793	9.14579e-12	373.77	0.845328	4.06061e-07	372.789	1.47311	2.86071	2.42988e-78	311.636	1.16073	1.2558e-12	411.696	1.08595	5.54942e-09	410.311	1.70246	1.68036	7.42709e-20	163.895	NS	NS	NS	NS	NS	NS	NS
CGI_10003177	1.81379	1.36077	NS	1.58728	25 kDa ookinete surface antigen-like	0.6529		1.85072	8.17184e-14	42.7544	0.927129	1.49582e-06	53.9535	2.66351	1.82995e-28	39.8277	1.81379	1.40965	2.86505e-08	32.4788	0.470777	0.0270276	43.023	2.20189	1.07869e-19	29.4845	1.36077	0.777344	0.0139992	24.6244	NS	NS	NS	1.5591	5.92393e-08	21.2464	NS
CGI_10018823	1.62166	1.5393	NS	1.58048	Extracellular matrix FRAS1	0.778		0.875528	0.00156662	15.3088	2.50303	2.57925e-13	11.7851	1.48643	6.59087e-07	13.5444	1.62166	0.824834	0.00447995	14.7081	2.37855	2.49235e-12	11.2616	1.41453	3.3599e-06	12.998	1.5393	-1.92307	9.96294e-07	6.20299	NS	NS	NS	-1.32289	0.00308609	4.19978	NS
CGI_10026368	2.00628	1.12438	NS	1.56533	hypothetical protein CGI_10026368	0.8425		2.12924	5.92339e-06	3.11449	1.93901	6.30791e-05	3.38843	1.9506	4.75219e-05	3.33021	2.00628	1.27994	0.00702056	1.62985	1.00751	0.0407852	1.83697	1.0857	0.0253066	1.81049	1.12438	NS	NS	NS	NS	NS	NS	NS	NS	NS	NS
CGI_10017552	1.69333	1.41037	NS	1.55185	hypothetical protein CGI_10017552	0.84		1.23343	1.87277e-05	23.0435	1.34709	1.17982e-06	23.5579	2.49946	5.33471e-16	19.2728	1.69333	0.972184	0.00166592	19.6285	1.07032	0.000305306	20.0156	2.18861	4.45027e-12	15.919	1.41037	NS	NS	NS	NS	NS	NS	1.10122	0.00493991	8.45293	NS
CGI_10011490	1.74625	1.33256	NS	1.53941	Cytochrome P450 1A2	0.692		1.42926	4.23715e-06	81.647	2.04182	3.20903e-13	77.5163	1.76767	1.87013e-12	79.5841	1.74625	1.05721	0.00620319	67.8754	1.59155	6.46501e-06	63.4168	1.34893	6.65189e-05	65.7845	1.33256	-0.854346	0.00398316	30.97	NS	NS	NS	-0.642594	0.0026317	27.8259	NS
CGI_10004338	1.95366	1.12303	NS	1.53834	histone H4 transcription factor-like isoform X4 [Lepisosteus oculatus]	0.641		2.03249	3.00357e-25	1002.56	1.58261	2.20709e-22	1124.22	2.24586	3.01839e-39	999.621	1.95366	1.21104	7.97285e-08	624.819	0.750304	0.000243685	728.965	1.40775	2.91266e-12	615.271	1.12303	NS	NS	NS	NS	NS	NS	NS	NS	NS	NS
CGI_10015494	1.5377	1.53637	NS	1.53703	hypothetical protein CGI_10015494	1		0.892313	0.0106362	10.6315	1.65806	3.67114e-06	9.32716	2.06272	1.10362e-07	8.47994	1.5377	0.938673	0.00881051	10.6794	1.65397	4.00777e-06	9.41907	2.01646	1.40928e-07	8.60142	1.53637	-1.43718	0.00115762	4.33104	NS	NS	NS	NS	NS	NS	NS
CGI_10010556	1.54523	1.50849	NS	1.52686	Tenascin-X [Schistosoma haematobium]	0.5095		1.67658	2.03363e-08	17.6972	0.772838	0.00852604	22.7022	2.18627	1.17833e-10	16.6862	1.54523	1.65286	5.60272e-06	18.8205	0.833669	0.0258232	23.7526	2.03892	1.20495e-07	17.8907	1.50849	NS	NS	NS	-0.749661	0.0292397	12.9514	NS	NS	NS	NS
CGI_10016410	1.54188	1.48869	NS	1.51528	hypothetical protein CGI_10016410	1		1.83072	8.06006e-05	4.25391	1.20414	0.00917903	5.2556	1.59078	0.000606337	4.62792	1.54188	1.75591	0.000122226	4.48952	1.18291	0.0097884	5.47983	1.52724	0.000680059	4.86985	1.48869	1.55779	0.000637109	3.19919	NS	NS	NS	1.26688	0.00566591	3.56258	NS
CGI_10024018	1.6238	1.3808	NS	1.5023	PREDICTED: uncharacterized protein LOC105338054 isoform X2 [Crassostrea gigas]	0.995		1.47571	0.00221517	10.9298	1.67358	0.000674872	10.974	1.72211	0.000407974	10.7305	1.6238	1.23077	0.0052568	6.98116	1.42814	0.00122602	6.85857	1.48349	0.000671277	6.70215	1.3808	NS	NS	NS	NS	NS	NS	NS	NS	NS	NS
CGI_10011920	1.32681	1.66309	NS	1.49495	SPRY domain-containing 3-like	0.554		1.39233	5.71361e-26	389.36	1.59769	4.43491e-29	390.018	0.990398	5.8215e-13	432.914	1.32681	1.73187	3.65016e-110	448.249	1.93248	6.65211e-97	451.477	1.32494	1.43199e-55	492.543	1.66309	NS	NS	NS	NS	NS	NS	-0.454115	5.58956e-06	253.863	NS
CGI_10010474	1.76241	1.17021	NS	1.46631	40S ribosomal S28 [Salmo salar]	0.972		2.22118	9.58278e-77	2554.27	1.49552	6.7452e-23	2957.34	1.57053	3.85057e-27	2863.04	1.76241	1.62364	1.0282e-32	1789.23	0.904136	6.44555e-08	2153.16	0.982847	9.12247e-10	2077.58	1.17021	NS	NS	NS	-0.9797	4.89985e-10	1163.17	-0.905104	3.21505e-09	1102.13	NS
CGI_10018759	1.78517	1.14725	NS	1.46621	acetylcholine receptor subunit alpha-1-B-like isoform X2 [Crassostrea gigas]	0.693		1.75133	1.29391e-06	16.6383	2.11535	3.37336e-09	16.5543	1.48884	6.41793e-05	17.8658	1.78517	1.13181	0.00653026	11.4396	1.43766	0.000321768	11.1594	0.87227	0.0412377	12.5378	1.14725	NS	NS	NS	NS	NS	NS	NS	NS	NS	NS
CGI_10004250	1.73453	1.19682	NS	1.46568	peroxisome assembly 26-like	0.685		1.59895	9.08727e-26	218.652	2.02202	1.84519e-48	213.488	1.58264	6.46434e-33	224.245	1.73453	1.06536	9.90275e-13	161.825	1.47981	1.83613e-29	154.668	1.04529	9.66991e-17	166.347	1.19682	NS	NS	NS	0.302407	0.0436683	94.2366	NS	NS	NS	NS
CGI_10013733	1.28461	1.63172	NS	1.45817	Multiple epidermal growth factor-like domains 6	0.721		1.28185	1.24372e-11	78.0904	0.654191	0.000362429	94.8771	1.91778	4.03105e-37	71.8097	1.28461	1.62776	6.71965e-19	91.7963	1.00036	7.7145e-09	108.752	2.26706	3.96821e-53	86.0962	1.63172	-0.683733	0.00624285	36.1353	-1.32404	5.57681e-10	51.5858	NS	NS	NS	NS
CGI_10003969	1.1251	1.78995	NS	1.45752	cysteine-rich motor neuron 1 -like [Crassostrea gigas]	0.733		0.796108	0.00433862	1149.19	1.14937	0.000501119	1084.98	1.42982	6.05625e-09	1019.67	1.1251	1.4395	1.57824e-15	1518.45	1.82375	3.07e-18	1471.3	2.1066	1.56386e-44	1401.87	1.78995	NS	NS	NS	NS	NS	NS	NS	NS	NS	NS
CGI_10026167	1.82111	1.08985	NS	1.45548	hypothetical protein CGI_10026167	0.784		2.99814	2.6192e-47	53.5091	1.20865	1.64008e-13	71.2279	1.25656	3.21686e-14	69.1322	1.82111	2.25312	3.05842e-22	33.3431	0.481688	0.0216643	49.8262	0.53474	0.00941265	48.1977	1.08985	0.72477	0.0274205	15.091	-1.03092	2.85481e-05	31.6417	-0.979795	7.78519e-05	30.2811	-0.42865
CGI_10001802	1.32534	1.5782	NS	1.45177	leukocyte elastase inhibitor-like	0.7175		1.53301	4.90204e-14	44.5095	1.04135	7.24548e-08	51.3395	1.40167	3.40524e-13	46.6055	1.32534	1.78827	5.28026e-21	50.0957	1.29158	4.26158e-13	56.9974	1.65475	3.07448e-20	52.3263	1.5782	0.766757	0.000404169	30.9256	NS	NS	NS	0.630542	0.00243511	32.7814	NS
CGI_10019397	1.47462	1.41715	NS	1.44589	F-box WD repeat-containing 5-like	0.7095		0.819768	8.62061e-06	145.563	1.40166	5.0854e-15	132.953	2.20244	3.81234e-32	115.042	1.47462	0.772771	9.19836e-05	139.009	1.34273	1.89783e-12	126.635	2.13596	1.69713e-27	109.406	1.41715	NS	NS	NS	0.421087	0.0105988	85.6541	1.24448	1.00408e-14	68.2788	NS
CGI_10025295	1.83653	1.03904	NS	1.43779	Multiple epidermal growth factor-like domains 10	0.725		1.1519	5.65708e-40	288.043	2.15792	4.09849e-85	252.834	2.19977	9.53425e-126	246.891	1.83653	0.365485	0.0101343	198.642	1.35249	2.73472e-19	161.022	1.39915	2.10563e-26	157.061	1.03904	-0.510914	0.000112163	154.688	0.486367	0.00307273	112.867	0.526608	0.000153317	109.664	0.167354
CGI_10002693	1.62715	1.24594	NS	1.43654	hypothetical protein CGI_10002693	1		1.35745	1.31235e-08	36.0412	1.77418	6.3237e-14	34.7935	1.74981	9.29677e-14	34.3118	1.62715	0.983324	2.11473e-05	28.802	1.38628	1.04788e-09	27.3253	1.36821	1.26526e-09	27.0113	1.24594	NS	NS	NS	NS	NS	NS	NS	NS	NS	NS
CGI_10003460	1.25089	1.61781	NS	1.43435	hypothetical protein CGI_10003460	0.96		1.34204	0.00502489	3.73658	1.29076	0.00768098	4.00822	1.11988	0.0204419	4.14291	1.25089	1.72038	8.58262e-05	5.02205	1.64288	0.000149182	5.3448	1.49017	0.00048297	5.45289	1.61781	1.0883	0.0241229	3.17641	1.02027	0.0376044	3.4288	NS	NS	NS	NS
CGI_10007478	1.36136	1.49815	NS	1.42975	patched domain-containing 3-like	0.6465		1.07209	2.06049e-14	613.4	2.43116	5.89324e-62	512.058	0.580819	0.00275403	707.516	1.36136	1.21331	2.72975e-18	640.625	2.56036	3.88211e-69	543.553	0.720779	0.000122227	733.778	1.49815	0.52385	0.026522	494.834	1.83276	3.39486e-17	385.302	NS	NS	NS	NS
CGI_10009201	1.50331	1.34153	NS	1.42242	Spore cortex-lytic enzyme	0.7725		1.66512	0.000198426	226.23	1.63304	0.00041539	237.025	1.21177	0.00845957	256.183	1.50331	1.57871	4.8734e-08	152.752	1.50498	8.15866e-07	160.264	0.940915	0.000281905	180.411	1.34153	NS	NS	NS	NS	NS	NS	NS	NS	NS	NS
CGI_10003770	1.5277	1.30251	NS	1.4151	Baculoviral IAP repeat-containing 3	0.6895		1.97589	6.09531e-34	178.49	0.794532	2.99247e-11	235.043	1.81267	2.33954e-21	186.315	1.5277	1.74975	5.40935e-24	153.932	0.571548	2.66179e-05	208.179	1.58623	1.16679e-15	161.313	1.30251	0.527487	0.00955035	87.9227	-0.675659	1.4134e-06	142.078	NS	NS	NS	NS
CGI_10005792	1.30634	1.50424	NS	1.40529	hypothetical protein CGI_10005792	0.6385		0.66468	4.8902e-15	212.821	1.22472	4.78766e-23	193.46	2.02962	1.20649e-74	165.233	1.30634	0.878858	9.59496e-11	229.021	1.41922	1.83163e-18	211.011	2.21464	6.36639e-46	183.336	1.50424	-0.359092	0.00381416	149.558	NS	NS	NS	1.00098	1.7544e-11	99.41	NS
CGI_10000544	1.16502	1.64249	NS	1.40376	Crt-like 1	0.6471		0.837563	9.88417e-09	70.2741	0.822667	3.35911e-05	73.0054	1.83484	1.33942e-23	58.5991	1.16502	1.32876	1.68028e-17	87.4923	1.30016	6.02374e-11	90.9108	2.29856	5.71693e-33	76.6085	1.64249	NS	NS	NS	NS	NS	NS	0.799235	0.00025359	35.2974	NS
CGI_10024957	1.40688	1.35742	NS	1.38215	probable transporter mch1	0.5255		2.59956	5.02061e-16	20.8766	0.955373	0.000178776	29.0002	0.665708	0.0221696	30.4653	1.40688	2.55046	2.12689e-16	19.8272	0.901587	0.000333578	27.7111	0.620202	0.0295437	29.1752	1.35742	NS	NS	NS	NS	NS	NS	-0.969667	0.01599	16.7771	NS
CGI_10016798	1.19548	1.49414	NS	1.34481	PREDICTED: uncharacterized protein LOC105342758 [Crassostrea gigas]	1		1.14278	0.0171965	0.895375	1.23805	0.0127859	0.931219	1.2056	0.0150691	0.913866	1.19548	1.47603	0.00149134	1.4896	1.51609	0.00103109	1.54823	1.4903	0.00114462	1.52133	1.49414	NS	NS	NS	NS	NS	NS	NS	NS	NS	NS
CGI_10023327	1.31506	1.37241	NS	1.34373	tyrosine- phosphatase non-receptor type 23-like	0.718		1.46499	9.60381e-39	280.929	1.18894	1.17461e-42	309.612	1.29124	1.96944e-33	296.69	1.31506	1.51965	4.32059e-22	285.237	1.24623	1.76671e-19	313.589	1.35135	3.841e-19	301.054	1.37241	NS	NS	NS	NS	NS	NS	NS	NS	NS	NS
CGI_10018158	1.24293	1.43936	NS	1.34114	tyrosine- phosphatase non-receptor type 23-like	0.7155		1.80225	6.02885e-38	341.022	1.0753	3.99114e-22	408.254	0.851236	9.59555e-13	421.975	1.24293	1.99059	2.15531e-34	374.415	1.27211	8.35396e-20	441.491	1.05538	3.17219e-13	454.37	1.43936	NS	NS	NS	-0.486312	1.90583e-07	228.962	-0.704007	2.50114e-12	246.573	NS
CGI_10020210	1.42014	1.26167	NS	1.34091	hypothetical protein CGI_10020210	0.849		1.95936	6.75163e-16	26.4096	1.12939	1.15484e-06	32.241	1.17167	2.2294e-07	31.2885	1.42014	1.78605	1.48024e-10	24.1113	0.975385	0.000416485	29.7162	1.02357	0.000132631	28.8432	1.26167	1.05966	0.000218048	16.3941	NS	NS	NS	NS	NS	NS	NS
CGI_10020615	1.28979	1.35829	NS	1.32404	multiple epidermal growth factor-like domains 6	0.712		0.796666	0.00207955	614.958	1.11643	4.11872e-07	594.948	1.95627	1.74319e-14	497.489	1.28979	0.920339	0.00861348	664.341	1.21463	0.000121826	647.201	1.93991	8.59457e-09	551.518	1.35829	NS	NS	NS	NS	NS	NS	NS	NS	NS	NS
CGI_10002668	1.15916	1.47486	NS	1.31701	hypothetical protein CGI_10002668	1		1.5478	0.000631905	6.2381	1.03281	0.0233301	7.47275	0.896881	0.0480725	7.6273	1.15916	1.89045	3.04361e-06	7.3926	1.33415	0.000644221	8.64239	1.19999	0.00174316	8.77706	1.47486	1.13741	0.0114524	4.37274	NS	NS	NS	NS	NS	NS	NS
CGI_10026858	1.85287	0.740896	NS	1.29688	baculoviral IAP repeat-containing 7	0.6235		1.68991	1.01219e-32	245.935	1.39416	2.13136e-31	270.567	2.47453	3.31034e-34	224.722	1.85287	0.575344	0.000148737	138.705	0.267176	0.0498499	158.606	1.38017	4.90244e-11	116.103	0.740896	0.392123	0.0463215	135.477	NS	NS	NS	1.19734	3.53108e-07	111.364	NS
CGI_10023328	1.25631	1.33684	NS	1.29657	tyrosine- phosphatase non-receptor type 23-like	0.739		1.53446	1.05856e-24	210.355	0.930829	6.77427e-15	249.099	1.30364	2.77067e-27	224.922	1.25631	1.60624	3.78198e-16	217.938	1.01838	7.58431e-09	256.158	1.3859	2.0636e-15	232.556	1.33684	0.871472	1.99187e-07	155.236	NS	NS	NS	0.636854	4.63333e-06	168.956	NS
CGI_10004356	1.48726	1.10494	NS	1.2961	hypothetical protein CGI_10004356	0.78		1.45023	0.00259886	1.54454	1.57748	0.00152184	1.60727	1.43407	0.00465816	1.6608	1.48726	1.11159	0.0144991	1.16964	1.14794	0.0114284	1.21706	1.05529	0.0237716	1.27922	1.10494	NS	NS	NS	NS	NS	NS	NS	NS	NS	NS
CGI_10009712	1.35039	1.2152	NS	1.2828	nidogen and EGF-like domain-containing 1	0.762		1.00367	7.83309e-06	96.7374	2.14253	9.34136e-39	82.8162	0.904978	2.44186e-09	102.133	1.35039	0.876393	0.000188837	88.8538	1.99418	3.11732e-30	75.0538	0.775034	2.36056e-06	94.064	1.2152	-1.06618	2.76559e-05	46.3476	NS	NS	NS	-1.24966	1.78902e-12	50.764	NS
CGI_10014702	1.38934	1.16107	NS	1.27521	polycystic kidney disease 1-like 2	0.7055		1.47304	3.16684e-18	119.652	1.7796	5.66409e-38	118.635	0.915395	5.17347e-08	137.707	1.38934	1.24509	4.07638e-11	104.036	1.54309	2.46553e-22	102.534	0.695041	0.000265684	121.473	1.16107	NS	NS	NS	0.564636	0.000132653	66.903	NS	NS	NS	NS
CGI_10023946	0.83954	1.70284	NS	1.27119	hypothetical protein CGI_10023946	0.8445		0.9262	0.0120757	8.81591	0.805674	0.0261765	9.56701	0.786745	0.0366183	9.38809	0.83954	1.79085	2.31714e-09	14.0858	1.6681	7.2824e-09	15.0373	1.64957	1.91214e-08	14.7703	1.70284	NS	NS	NS	NS	NS	NS	NS	NS	NS	NS
CGI_10006215	1.2741	1.26691	NS	1.27051	ATP synthase mitochondrial F1 complex assembly factor 2	0.7		1.3382	5.54841e-17	173.093	1.27351	1.68236e-15	182.428	1.21061	1.86417e-14	181.407	1.2741	1.33473	1.00432e-27	166.771	1.26116	1.86108e-24	175.775	1.20485	2.22636e-23	175.012	1.26691	NS	NS	NS	-0.328529	0.014737	96.3432	-0.385391	0.00237043	97.0074	NS
CGI_10025970	1.52467	1.01079	NS	1.26773	receptor-type tyrosine- phosphatase T-like	0.706		1.83903	3.26125e-19	184.577	1.43335	5.03437e-20	207.437	1.30163	1.07663e-16	208.521	1.52467	1.32843	6.11963e-09	136.775	0.913601	9.7309e-07	157.254	0.790344	2.5586e-05	159.284	1.01079	NS	NS	NS	-0.398315	0.0364416	98.5893	-0.523871	0.00410155	101.88	NS
CGI_10015096	1.1306	1.36245	NS	1.24653	Acetyl- carboxylase	0.7735		1.17199	7.22325e-17	115.555	1.50752	1.06058e-33	112.718	0.712311	1.60057e-08	132.068	1.1306	1.40382	3.40029e-24	126.738	1.7354	5.34005e-45	124.507	0.948131	1.27875e-14	143.238	1.36245	0.42176	0.0108842	84.3809	0.74787	8.31084e-08	80.0557	NS	NS	NS	NS
CGI_10022798	1.39934	1.08813	NS	1.24373	Lupus brain antigen 1	0.7375		1.19773	2.02679e-12	248.035	1.96926	6.54011e-27	225.164	1.03103	1.42892e-11	263.256	1.39934	0.896446	0.000137037	211.531	1.63316	3.76734e-12	187.982	0.734767	0.00100149	225.842	1.08813	NS	NS	NS	0.987855	2.16041e-08	136.255	NS	NS	NS	NS
CGI_10006512	1.44027	1.04567	NS	1.24297	ganglioside GM2 activator-like	0.7867		1.82368	6.64174e-47	146.623	0.880598	6.26138e-11	183.799	1.61654	1.14492e-46	154.858	1.44027	1.42633	7.88928e-23	116.056	0.488464	0.00216796	151.153	1.22221	5.05343e-21	123.657	1.04567	NS	NS	NS	-0.732198	2.56124e-05	104.629	NS	NS	NS	NS
CGI_10008256	1.34993	1.12471	NS	1.23732	Gametocyte-specific factor 1	0.8522		1.27199	0.00382675	4.52652	1.39397	0.00142218	4.62843	1.38382	0.00214189	4.52634	1.34993	1.07849	0.022808	4.28649	1.17429	0.0110247	4.37718	1.12137	0.0176277	4.28573	1.12471	NS	NS	NS	NS	NS	NS	NS	NS	NS	NS
CGI_10010959	1.33068	1.14329	NS	1.23699	Myb-related transcription partner of profilin	0.7779		1.28401	6.65977e-06	18.4888	1.09831	9.43772e-05	20.1908	1.60972	1.63497e-08	17.7365	1.33068	1.10502	0.000529404	16.7262	0.914752	0.00402439	18.3341	1.41011	6.02656e-06	15.9916	1.14329	NS	NS	NS	NS	NS	NS	NS	NS	NS	NS
CGI_10019209	1.31628	1.1429	NS	1.22959	Transformation transcription domain-associated	0.619		1.21302	2.53546e-05	38.6563	1.22731	4.94324e-06	40.3746	1.50852	2.4025e-08	37.3706	1.31628	1.05064	0.00196211	35.4493	1.05442	0.00107079	37.0172	1.32365	3.05545e-05	34.1935	1.1429	NS	NS	NS	NS	NS	NS	NS	NS	NS	NS
CGI_10015380	1.20811	1.24785	NS	1.22798	prostate-associated microsemino -like	0.558		1.39323	3.89983e-05	13.0058	1.49985	3.2397e-06	13.3466	0.731247	0.0134467	15.7651	1.20811	1.43265	1.92297e-05	13.0862	1.5238	1.60816e-06	13.426	0.787097	0.0069176	15.7891	1.24785	NS	NS	NS	NS	NS	NS	NS	NS	NS	NS
CGI_10021070	0.767774	1.68254	NS	1.22515	hypothetical protein CGI_10021070	0.9225		0.67434	0.00013963	45.8676	0.905578	5.24049e-06	44.6409	0.723403	0.000951015	45.8682	0.767774	1.6061	2.34243e-09	75.8394	1.80977	1.13576e-10	75.8941	1.63174	2.2483e-08	76.5936	1.68254	NS	NS	NS	NS	NS	NS	NS	NS	NS	NS
CGI_10004833	1.45343	0.985195	NS	1.21931	2-oxoglutarate and iron-dependent oxygenase domain-containing 1	0.7435		1.64989	5.15083e-27	99.3286	1.35454	2.9844e-27	109.457	1.35586	3.0617e-23	107.394	1.45343	1.18212	2.29212e-10	76.5386	0.884258	2.1603e-08	85.5773	0.889209	1.60579e-07	84.0478	0.985195	NS	NS	NS	NS	NS	NS	NS	NS	NS	NS
CGI_10015765	0.948747	1.47211	NS	1.21043	hypothetical protein CGI_10015765	0.7467		1.1671	2.26323e-13	199.476	0.557309	0.000431759	242.221	1.12184	3.00795e-11	205.601	0.948747	1.6946	4.10438e-52	253.201	1.07369	4.59936e-26	297.113	1.64803	5.22682e-41	260.588	1.47211	0.597456	0.000632671	156.891	NS	NS	NS	0.555	0.00276268	162.189	NS
CGI_10002485	1.34077	1.07238	NS	1.20658	hypothetical protein CGI_10002485	0.6243		1.26699	1.74394e-18	89.0745	1.64064	1.28158e-21	86.2365	1.11468	8.4101e-18	94.0102	1.34077	1.00042	7.297e-12	76.2138	1.369	1.9338e-15	73.0126	0.847708	1.36365e-10	80.8761	1.07238	0.431487	0.0138798	62.2887	0.805126	4.26094e-05	58.1763	NS	NS	NS	NS
CGI_10021156	1.32619	1.08628	NS	1.20623	ER membrane complex subunit 7-like	0.7585		1.8502	3.63837e-58	135.74	0.580834	1.04677e-09	184.939	1.54752	1.07488e-42	145.351	1.32619	1.60598	4.83178e-33	116.629	0.343558	0.00463626	163.913	1.3093	1.85415e-23	125.801	1.08628	0.732464	2.67121e-06	79.9116	-0.533941	2.78543e-05	127.959	0.437071	0.0059651	88.5635	0.211865
CGI_10024947	1.54304	0.858895	NS	1.20097	dynein heavy chain axonemal-like	0.8235		1.5451	2.65662e-08	17.8957	1.35394	5.40251e-07	19.3356	1.73008	1.66811e-10	17.736	1.54304	0.86602	0.01034	12.1781	0.670585	0.0485752	13.3653	1.04008	0.000980242	11.9246	0.858895	NS	NS	NS	NS	NS	NS	0.743922	0.0346126	10.7943	NS
CGI_10013029	1.14389	1.25761	NS	1.20075	cell division control 6 homolog	0.8065		1.04885	1.96797e-08	109.328	1.11891	4.06276e-10	112.163	1.2639	3.94427e-12	106.537	1.14389	1.16217	5.48655e-19	111.215	1.22914	5.25529e-23	114.164	1.38153	8.57836e-27	108.727	1.25761	NS	NS	NS	NS	NS	NS	NS	NS	NS	NS
CGI_10012325	1.11447	1.25108	NS	1.18278	28S ribosomal mitochondrial precursor [Schistosoma japonicum]	0.6935		0.3863	0.00842051	78.8806	1.57196	3.05756e-26	61.8319	1.38516	7.1872e-21	62.7109	1.11447	0.537716	0.0026485	82.1052	1.69659	8.76744e-22	65.7109	1.51895	1.04527e-17	66.5548	1.25108	-1.0568	5.61761e-09	51.2172	NS	NS	NS	NS	NS	NS	NS
CGI_10018741	1.08395	1.27491	NS	1.17943	kynurenine formamidase-like [Biomphalaria glabrata]	0.706		1.53709	7.93677e-46	504.375	1.13987	1.7995e-43	568.751	0.574885	4.21224e-05	640.32	1.08395	1.72663	8.06353e-49	545.866	1.32908	1.75973e-44	610.623	0.769004	7.7513e-08	679.898	1.27491	1.30282	4.82212e-15	464.912	0.91053	2.71482e-09	528.738	NS	NS	NS	NS
CGI_10023990	1.52536	0.827129	NS	1.17624	transcription factor COE1-like isoform X2	0.8435		1.4565	2.155e-10	304.091	1.52138	4.7173e-12	313.584	1.59819	2.87745e-12	302.946	1.52536	0.764284	0.00107394	207.231	0.816416	0.000210516	212.759	0.900686	7.737e-05	204.263	0.827129	-0.268124	0.0441691	144.282	NS	NS	NS	NS	NS	NS	NS
CGI_10007419	1.23577	1.11432	NS	1.17505	Three prime repair exonuclease 1	0.5685		0.583986	0.00449995	96.2764	1.34815	1.23612e-11	83.3728	1.77518	2.83975e-25	76.051	1.23577	0.462124	0.0190407	88.8939	1.22377	3.91602e-11	76.1395	1.65707	1.68919e-26	69.1902	1.11432	-1.28196	8.41255e-10	54.2036	-0.526465	0.0321266	39.2106	NS	NS	NS	NS
CGI_10014328	1.2908	1.05192	NS	1.17136	transient receptor potential cation channel subfamily M member 2-like [Crassostrea gigas]	0.8355		1.72774	1.43456e-113	3015.64	1.10735	2.78061e-39	3528.83	1.03732	3.13695e-36	3514.94	1.2908	1.49046	1.68831e-133	2585.65	0.865162	1.59248e-33	3070.81	0.800151	8.25731e-31	3067.25	1.05192	0.55509	6.14511e-13	1760.8	NS	NS	NS	NS	NS	NS	NS
CGI_10001715	1.39192	0.944912	NS	1.16842	glycine receptor subunit alpha-3-like isoform X1 [Biomphalaria glabrata]	0.7515		1.30321	6.53261e-13	272.485	1.70922	3.80366e-21	263.468	1.16333	4.67187e-10	286.623	1.39192	0.857083	4.89775e-10	211.347	1.26158	5.33501e-20	200.289	0.716079	1.5003e-06	224.134	0.944912	NS	NS	NS	NS	NS	NS	NS	NS	NS	NS
CGI_10004167	1.12489	1.18767	NS	1.15628	vacuolar sorting-associated 13D isoform X3	0.64		1.09344	3.95538e-20	1031.61	1.27207	2.6563e-24	1032.96	1.00914	1.71057e-16	1073.16	1.12489	1.15757	1.45604e-17	1040.39	1.3304	2.14009e-21	1043.02	1.07504	5.60241e-15	1082.49	1.18767	NS	NS	NS	0.314289	0.00476925	689.302	NS	NS	NS	NS
CGI_10007617	1.23243	1.05986	NS	1.14615	serine threonine- phosphatase 6 regulatory ankyrin repeat subunit B-like	0.572		1.16077	8.02393e-06	27.745	1.48519	2.19809e-07	26.9128	1.05135	3.66054e-05	29.1042	1.23243	0.992933	5.36629e-05	24.6632	1.30828	1.45071e-06	23.7467	0.878374	0.000236684	25.9452	1.05986	NS	NS	NS	0.745597	0.0146602	18.5222	NS	NS	NS	NS
CGI_10024466	1.16075	1.12266	NS	1.14171	chondroitin proteoglycan-2-like	0.5735		0.939507	7.40961e-06	65.2539	1.4713	2.35173e-18	60.8505	1.07143	9.17094e-11	64.9043	1.16075	0.90581	9.09182e-05	62.9955	1.42549	4.99718e-14	58.6595	1.03669	3.08095e-08	62.686	1.12266	NS	NS	NS	NS	NS	NS	NS	NS	NS	NS
CGI_10005108	1.14072	1.1389	NS	1.13981	c-binding -like	0.6915		1.03178	0.00712675	24.2905	1.21564	0.00112582	24.3472	1.17472	0.00137721	24.1534	1.14072	1.03211	0.000625546	22.5844	1.2113	2.9309e-05	22.5848	1.17329	3.11722e-05	22.4402	1.1389	NS	NS	NS	0.652162	0.0459904	17.7598	NS	NS	NS	NS
CGI_10003276	0.96396	1.3027	NS	1.13333	hypothetical protein CGI_10003276	0.6495		0.893508	6.36451e-05	34.8589	1.21063	3.82134e-09	33.7107	0.787744	0.000155008	36.5544	0.96396	1.23153	3.9443e-07	40.8198	1.54151	9.10062e-12	39.9827	1.13508	6.31971e-07	42.6748	1.3027	-1.12424	7.94494e-05	17.3515	-0.848654	0.00252189	15.4395	-1.25547	1.96105e-06	18.7151	-1.07612
CGI_10014130	0.888328	1.34961	NS	1.11897	Alkaline tissue-nonspecific isozyme [Crassostrea gigas]	0.733		1.60144	9.1511e-21	55.2979	0.74333	8.33232e-06	69.5487	0.320216	0.0404509	77.0047	0.888328	2.03665	2.24932e-21	71.407	1.20425	7.37357e-09	85.9663	0.807929	3.92177e-05	92.9909	1.34961	NS	NS	NS	-0.750422	0.000180588	41.7811	-1.17841	1.07464e-12	49.9803	NS
CGI_10018033	0.875225	1.33905	NS	1.10714	Collagen alpha-5(IV) partial	0.8395		0.365876	0.0119862	159.874	0.921419	7.84025e-11	142.531	1.33838	7.24471e-29	127.691	0.875225	0.831538	1.24369e-10	190.083	1.38083	8.26231e-25	174.57	1.80479	8.42439e-55	159.658	1.33905	NS	NS	NS	0.640708	2.92795e-05	128.938	1.06155	1.17824e-16	114.132	NS
CGI_10024815	0.947251	1.22382	NS	1.08554	NFU1 iron-sulfur cluster scaffold mitochondrial-like	0.914		0.913102	1.86535e-05	49.0953	1.00406	4.30316e-08	50.1545	0.924589	2.25783e-07	50.2073	0.947251	1.18906	7.07452e-08	55.3858	1.27747	5.01091e-11	56.717	1.20495	1.75077e-10	56.6854	1.22382	NS	NS	NS	NS	NS	NS	NS	NS	NS	NS
CGI_10006911	1.23646	0.918791	NS	1.07762	hypothetical protein CGI_10006911	0.7333		1.26843	9.12237e-10	74.6169	1.16413	3.40546e-13	79.9604	1.27681	1.40734e-07	75.8434	1.23646	0.951351	0.00188958	64.0055	0.846247	0.00211055	68.8273	0.958776	0.00281493	65.0516	0.918791	NS	NS	NS	NS	NS	NS	NS	NS	NS	NS
CGI_10007647	1.09638	1.04318	NS	1.06978	15-hydroxyprostaglandin dehydrogenase [NAD(+)]	0.6845		0.657488	8.08226e-06	182.006	1.11952	1.41113e-10	168.36	1.51213	4.18116e-15	151.996	1.09638	0.640832	0.0377435	180.561	1.0631	0.000374434	167.396	1.4256	2.09856e-06	151.694	1.04318	NS	NS	NS	NS	NS	NS	1.00781	0.0143203	133.589	NS
CGI_10008231	0.959814	1.17305	NS	1.06643	transmembrane 145 isoform X1	0.6275		0.636942	1.04964e-06	335.14	0.555544	8.89928e-05	356.748	1.68696	1.90321e-28	271.426	0.959814	0.853398	8.72245e-12	359.224	0.767708	1.08195e-08	381.529	1.89806	1.17151e-37	298.173	1.17305	-0.4288	0.0103698	231.942	-0.511417	0.0026537	249.564	0.620347	0.00110028	164.343	-0.106623
CGI_10017062	1.00447	1.12316	NS	1.06382	vacuolar sorting-associated 13D-like	0.61		0.920851	7.26878e-11	985.087	1.07146	1.32449e-12	988.939	1.02111	1.16311e-11	981.194	1.00447	1.04178	2.00676e-12	1018.21	1.18626	3.5556e-14	1024.22	1.14143	1.83031e-13	1016.41	1.12316	NS	NS	NS	NS	NS	NS	NS	NS	NS	NS
CGI_10022657	0.855007	1.27157	NS	1.06329	hypothetical protein CGI_10022657	0.89		0.481697	0.0325674	43.5271	1.04455	2.23404e-05	38.821	1.03877	4.41842e-05	38.0597	0.855007	0.914805	3.404e-05	51.6892	1.45122	3.07819e-09	47.4776	1.44869	6.35273e-09	46.5974	1.27157	NS	NS	NS	NS	NS	NS	NS	NS	NS	NS
CGI_10028395	1.25384	0.869175	NS	1.06151	Kynurenine--oxoglutarate transaminase 1	0.726		1.17963	0.000471208	151.306	1.31826	0.000670948	150.523	1.26363	0.00102794	149.468	1.25384	0.751596	0.00572153	113.494	0.956041	0.000695269	111.462	0.899888	0.00114059	111.273	0.869175	NS	NS	NS	0.553253	0.0430085	95.669	NS	NS	NS	NS
CGI_10017437	0.817225	1.30311	NS	1.06017	poly-Ala Shelk2	0.951		0.689002	0.0058974	7976.93	0.834339	0.000923474	7984.85	0.928333	6.47752e-06	7681.09	0.817225	1.17358	0.00205522	10954.8	1.31344	0.000312894	11087	1.4223	2.64902e-05	10749.8	1.30311	NS	NS	NS	NS	NS	NS	0.681022	0.0376322	7183.46	NS
CGI_10003067	1.24601	0.857021	NS	1.05152	calcitonin gene-related peptide type 1 receptor-like	0.7921		0.880967	2.08855e-09	64.2942	1.08903	5.52635e-13	63.8328	1.76803	2.17578e-26	54.731	1.24601	0.500421	0.0100344	53.1139	0.698307	0.000291316	52.278	1.37233	5.24135e-12	43.6618	0.857021	NS	NS	NS	NS	NS	NS	1.06101	1.95908e-05	39.4684	NS
CGI_10024236	1.3429	0.753225	NS	1.04806	hypothetical protein CGI_10024236	0.7089		1.21578	1.30878e-10	37.6718	1.61408	3.87645e-16	36.3548	1.19884	3.10195e-09	38.7065	1.3429	0.631924	0.00655933	27.7995	1.01557	1.142e-05	26.152	0.612185	0.0138729	28.6572	0.753225	-0.60607	0.0431831	18.4472	NS	NS	NS	NS	NS	NS	NS
CGI_10014910	1.17908	0.915396	NS	1.04724	Tyrosine- kinase Abl	0.7518		0.994826	7.94847e-21	2194.62	2.08308	6.77406e-77	1877.4	0.459325	2.46225e-05	2579.19	1.17908	0.730735	3.2605e-24	1890.29	1.82181	1.66974e-108	1571.08	0.193644	0.0121119	2261.4	0.915396	-0.412517	0.000640364	1304.82	0.671115	7.04253e-08	941.257	-0.946868	7.60903e-18	1679.76	-0.229423
CGI_10019538	1.05508	1.03272	NS	1.0439	PREDICTED: uncharacterized protein LOC105334022 [Crassostrea gigas]	0.6205		1.16114	0.000250403	292.683	0.838684	3.12132e-06	336.565	1.16543	4.04742e-10	305.072	1.05508	1.10123	0.00178843	284.316	0.832716	4.16933e-07	327.035	1.16422	1.45646e-11	296.777	1.03272	-3.25978	8.65801e-23	91.0429	-4.15488	2.06276e-84	127.764	-3.79324	3.84511e-62	99.5667	-3.73597
CGI_10013188	0.968191	1.1154	NS	1.0418	[Nematostella vectensis]	0.708		1.47685	3.28631e-09	24.7554	0.932689	0.00102837	28.8941	0.495035	0.0407313	32.2282	0.968191	1.6282	1.52305e-12	26.1028	1.07236	2.52725e-05	30.2052	0.645658	0.00234087	33.4428	1.1154	1.03623	0.000232794	20.2151	NS	NS	NS	NS	NS	NS	NS
CGI_10013105	1.05256	1.00279	NS	1.02768	Baculoviral IAP repeat-containing 7-A [Crassostrea gigas]	0.6165		0.643894	0.000317999	562.151	1.38639	1.54227e-08	486.626	1.1274	3.94497e-07	505.91	1.05256	0.600228	0.00109207	537.492	1.32881	4.78909e-08	463.429	1.07933	1.17227e-06	482.93	1.00279	-5.6061	3.37744e-141	225.836	-4.59069	8.82322e-58	134.294	-4.95503	4.64923e-77	160.823	-5.05061
CGI_10000731	1.10101	0.952427	NS	1.02672	basic phospholipase A2 Ts-G6D49-like isoform X1 [Octopus bimaculoides]	0.6295		0.819709	2.42526e-16	174.953	1.85875	4.87485e-42	147.752	0.624581	1.08497e-05	187.583	1.10101	0.677735	3.84432e-06	160.767	1.69078	1.31264e-22	133.824	0.488768	0.0078951	173.003	0.952427	-0.433814	0.000649045	112.054	0.604374	0.000577127	81.4142	-0.612236	0.000226242	123.606	-0.147226
CGI_10009862	1.35942	0.68397	NS	1.02169	mitochondrial carrier homolog 2	0.709		1.49547	7.50498e-195	1146.49	1.39995	2.08119e-96	1213.53	1.18283	9.1221e-105	1243.88	1.35942	0.818357	1.14743e-20	808.826	0.722633	1.62314e-13	861.549	0.51092	2.7313e-08	898.094	0.68397	0.141937	0.0192277	645.617	NS	NS	NS	-0.168378	0.00781209	734.568	NS
CGI_10018157	0.929796	1.09988	NS	1.01484	tyrosine- phosphatase non-receptor type 23-like	0.765		1.16122	2.88932e-22	310.187	0.667867	1.41438e-13	364.746	0.9603	1.35778e-19	331.798	0.929796	1.32295	2.09251e-11	335.098	0.84506	4.89951e-06	389.519	1.13161	1.67449e-09	357.047	1.09988	NS	NS	NS	-0.331515	0.0170105	258.194	NS	NS	NS	NS
CGI_10017435	0.917841	1.10785	NS	1.01285	neuronal acetylcholine receptor subunit alpha-7-like	0.6555		0.843849	0.00483536	16.3754	0.880883	0.00298648	16.9018	1.02879	0.000607412	15.9274	0.917841	1.03833	9.9476e-05	17.5401	1.06692	5.30784e-05	18.1124	1.21831	5.27227e-06	17.1483	1.10785	NS	NS	NS	NS	NS	NS	NS	NS	NS	NS
CGI_10022224	1.31172	0.696498	NS	1.00411	hypothetical protein CGI_10022224	0.7475		1.05871	6.56308e-07	315.403	1.60611	2.69153e-15	294.584	1.27034	6.15854e-10	307.898	1.31172	0.440723	0.00671252	229.412	0.993857	2.26671e-12	205.899	0.654915	7.45746e-06	220.549	0.696498	-0.605937	3.32568e-05	168.174	NS	NS	NS	-0.394307	0.00576029	157.15	NS
CGI_10005790	1.1439	0.860952	NS	1.00243	cell wall DAN4-like isoform X2	0.7273		0.722849	1.04981e-11	1132.4	1.47879	3.06571e-36	994.848	1.23007	1.52213e-24	1024.19	1.1439	0.450691	0.0180116	987.402	1.18454	3.33678e-11	848.902	0.94763	1.84556e-07	880.525	0.860952	NS	NS	NS	0.573162	0.000254121	666.827	0.333266	0.0468706	703.918	NS
CGI_10009861	1.30749	0.680681	NS	0.994084	Tetratricopeptide repeat 23	0.7095		1.43455	5.81935e-12	33.1451	1.30192	5.85437e-10	35.4649	1.18598	3.47294e-09	35.7585	1.30749	0.810056	0.00086987	23.4981	0.670598	0.0078641	25.4067	0.561389	0.0201658	25.8876	0.680681	NS	NS	NS	NS	NS	NS	-0.567812	0.0355019	17.9766	NS
CGI_10025108	1.06355	0.923272	NS	0.99341	meiosis inhibitor 1-like	0.69		0.870491	2.13882e-07	81.508	1.13038	2.02386e-11	79.7878	1.18977	1.56375e-12	77.2429	1.06355	0.732815	2.15622e-05	74.4865	0.986327	9.23619e-09	72.604	1.05067	7.10803e-10	70.2952	0.923272	NS	NS	NS	NS	NS	NS	NS	NS	NS	NS
CGI_10016169	0.721628	1.25574	NS	0.988686	monocarboxylate transporter 5-like isoform X2 [Crassostrea gigas]	0.63		0.447146	0.00130447	93.1226	1.15396	1.40514e-14	80.6912	0.563781	0.000122331	91.8579	0.721628	0.987043	2.94594e-11	115.648	1.6781	5.28119e-25	104.536	1.10208	1.13516e-12	115.032	1.25574	NS	NS	NS	1.01783	1.68219e-09	77.934	0.437766	0.00972661	89.5059	NS
CGI_10015817	0.946911	1.0274	NS	0.987158	phosphatidylinositol 4,5-bisphosphate 3-kinase catalytic subunit alpha isoform-like	0.773		0.895108	3.96455e-05	1100.99	1.00454	2.02962e-06	1117.4	0.941081	2.51749e-05	1111.22	0.946911	0.977484	1.17335e-13	1098.21	1.08338	6.60223e-18	1114.76	1.02135	1.99513e-12	1109.34	1.0274	NS	NS	NS	NS	NS	NS	NS	NS	NS	NS
CGI_10007147	0.895804	1.0728	NS	0.984304	serine threonine- phosphatase 6 regulatory ankyrin repeat subunit A-like [Crassostrea gigas]	0.5885		0.719989	3.88646e-06	76.0402	1.55609	1.12728e-21	65.8035	0.411338	0.0184151	84.7889	0.895804	0.90071	2.27467e-08	80.5045	1.72314	1.50182e-24	70.7819	0.594561	0.00058078	89.2127	1.0728	NS	NS	NS	0.86512	4.25576e-05	48.1275	NS	NS	NS	NS
CGI_10025406	1.115	0.839828	NS	0.977414	zinc finger X-linked ZXDB-like	0.8022		1.07259	1.03799e-09	42.3831	1.056	4.44025e-09	44.3377	1.21641	1.04402e-09	41.774	1.115	0.803718	0.00234919	37.1422	0.779117	0.00399842	38.8667	0.936649	0.000938375	36.4918	0.839828	-1.23663	1.34276e-06	19.1369	-1.25451	2.21673e-06	20.1627	-1.0629	0.000327311	18.0093	-1.18468
CGI_10004768	0.972085	0.978034	NS	0.975059	atrial natriuretic peptide receptor 1-like	0.745		1.17097	2.86912e-43	1070.2	1.09294	4.13143e-60	1133.79	0.652352	2.77676e-29	1239.29	0.972085	1.17659	4.6222e-44	1044.92	1.09611	2.61424e-62	1106.78	0.6614	2.90063e-31	1210.58	0.978034	0.293657	0.00871652	747.928	0.209242	0.0311712	798.81	-0.225611	0.00819658	914.024	0.0924291
CGI_10005301	0.99487	0.948282	NS	0.971576	Ankyrin-1	0.699		0.671331	8.06773e-09	666.211	1.0952	3.95704e-08	619.843	1.21808	4.6257e-28	596.467	0.99487	0.62693	3.38626e-08	636.226	1.04319	1.13936e-07	590.579	1.17472	8.57697e-28	568.652	0.948282	NS	NS	NS	NS	NS	NS	0.366101	0.00303969	417.863	NS
CGI_10021609	0.756936	1.18507	NS	0.971002	prostaglandin E2 receptor EP4 subtype-like [Crassostrea gigas]	0.678		0.968614	1.12814e-05	35.4243	0.516126	0.0171784	41.6841	0.786068	0.000475613	37.9765	0.756936	1.39858	2.60139e-13	42.9008	0.940352	1.66974e-07	49.3316	1.21627	2.05357e-10	45.6045	1.18507	NS	NS	NS	NS	NS	NS	NS	NS	NS	NS
CGI_10019548	0.813057	1.12135	NS	0.967204	coiled-coil domain-containing 57-like	0.5845		0.778013	9.04935e-12	269.159	0.888853	9.76955e-16	272.391	0.772306	1.45359e-10	274.928	0.813057	1.08721	4.54357e-17	303.503	1.19417	4.0483e-21	308.298	1.08267	5.9089e-16	310.271	1.12135	NS	NS	NS	NS	NS	NS	NS	NS	NS	NS
CGI_10012640	0.940991	0.991024	NS	0.966007	short-chain collagen C4-like	0.8435		0.621701	6.56308e-07	413.01	1.72477	2.02185e-29	337.349	0.476497	0.00432531	438.54	0.940991	0.674389	5.9767e-08	411.831	1.76813	1.90723e-31	338.462	0.530556	0.00119266	437.206	0.991024	NS	NS	NS	1.22113	1.18934e-13	266.41	NS	NS	NS	NS
CGI_10005235	1.0403	0.886366	NS	0.963332	angiopoietin-2-like isoform X1	0.871		0.605392	7.47177e-08	553.478	0.966689	2.18416e-16	524.821	1.54881	2.25227e-24	455.122	1.0403	0.454921	0.000426178	506.35	0.810814	3.3012e-10	477.067	1.39336	2.30012e-18	410.371	0.886366	-1.13287	6.38386e-19	324.552	-0.775242	2.30579e-08	285.378	NS	NS	NS	NS
CGI_10017389	0.765297	1.15504	NS	0.960167	ATP-dependent DNA helicase Q4	0.7425		0.758597	4.46563e-08	85.4077	0.756869	1.44007e-06	88.8366	0.780425	3.93847e-10	86.8439	0.765297	1.14934	1.01663e-16	100.023	1.14053	1.36142e-13	104.029	1.17524	1.98298e-21	101.848	1.15504	NS	NS	NS	NS	NS	NS	NS	NS	NS	NS
CGI_10028159	0.859062	1.04026	NS	0.949662	PREDICTED: uncharacterized protein LOC105348448 [Crassostrea gigas]	0.4994		0.702266	0.00628937	191.826	1.03852	2.71145e-06	184.024	0.836401	0.000791359	189.215	0.859062	0.881776	1.01732e-05	201.625	1.22167	4.89469e-14	194.528	1.01734	1.53469e-07	199.465	1.04026	-0.441409	0.0366002	126.212	NS	NS	NS	NS	NS	NS	NS
CGI_10018601	0.97872	0.917079	NS	0.947899	hypothetical protein CGI_10018601	0.6535		1.26835	0.00924073	121.673	0.404483	0.000550676	207.824	1.26332	5.81162e-18	163.438	0.97872	1.17197	0.0123864	115.548	0.363653	0.0155015	199.307	1.21562	3.76273e-13	156.316	0.917079	NS	NS	NS	-3.84045	3.89385e-86	97.0057	-2.91939	2.55812e-34	53.6613	NS
CGI_10023626	0.770426	1.12321	NS	0.946817	cartilage matrix -like	0.7405		0.491311	4.61017e-06	786.951	0.401917	0.0122499	839.771	1.41805	2.41715e-21	641.361	0.770426	0.8523	1.49963e-09	900.012	0.756215	1.55786e-05	956.857	1.76111	2.87486e-25	761.748	1.12321	NS	NS	NS	NS	NS	NS	0.664218	0.000281268	458.352	NS
CGI_10003400	0.830639	1.05525	NS	0.942945	tyrosine- phosphatase non-receptor type 23-like	0.8035		1.05095	4.15544e-18	127.979	0.794037	1.07288e-10	141.902	0.646928	2.98205e-08	144.58	0.830639	1.27009	2.78726e-12	141.185	1.01535	2.51378e-08	155.389	0.880318	6.97276e-07	157.784	1.05525	NS	NS	NS	NS	NS	NS	NS	NS	NS	NS
CGI_10013599	1.10291	0.767784	NS	0.935347	U11 U12 small nuclear ribonucleo 35 kDa	0.844		1.00604	1.12879e-06	34.4817	1.16515	3.42035e-08	34.6684	1.13754	7.74227e-09	34.2125	1.10291	0.675902	0.00694529	28.9173	0.82286	0.00108302	28.9122	0.804591	0.00048525	28.589	0.767784	NS	NS	NS	NS	NS	NS	NS	NS	NS	NS
CGI_10023444	0.878276	0.98358	NS	0.930928	serine threonine- kinase Nek1- partial	0.7145		0.981119	0.00276438	24.1479	0.681997	0.0378883	27.3659	0.971711	0.00769946	24.5927	0.878276	1.09529	0.000138878	24.7924	0.781633	0.00585921	27.9655	1.07381	0.000929973	25.2656	0.98358	0.857771	0.00697225	23.1677	NS	NS	NS	0.852402	0.0163013	23.5869	NS
CGI_10025933	1.00336	0.852588	NS	0.927972	WW domain binding 1-like isoform X1	0.782		0.498978	0.000865212	2317.5	1.70129	1.3311e-35	1841.91	0.809794	9.53002e-11	2175.27	1.00336	0.350078	0.0219086	2122.98	1.54629	6.29678e-32	1653.83	0.661393	3.49054e-08	1982.77	0.852588	-0.330365	0.0142168	1754.72	0.87217	5.02024e-13	1241.24	NS	NS	NS	NS
CGI_10015048	0.597007	1.25266	NS	0.924833	THAP domain-containing 4	0.7278		0.739919	1.07016e-07	498.647	0.51728	0.00039363	552.001	0.533823	5.48137e-05	539.131	0.597007	1.39651	2.95687e-38	663.282	1.1682	5.1373e-26	722.23	1.19327	3.36825e-35	706.986	1.25266	NS	NS	NS	-0.448233	4.93664e-05	401.139	-0.430032	1.8072e-06	391.063	NS
CGI_10009994	0.888636	0.934411	NS	0.911523	maestro heat-like repeat-containing family member 1	0.784		1.17936	3.13672e-18	137.861	0.656233	4.58208e-07	163.135	0.830314	5.20248e-14	153.015	0.888636	1.21876	2.39647e-11	138.72	0.704268	9.23545e-05	163.514	0.880205	6.31468e-08	153.685	0.934411	-1.47151	1.01284e-15	57.294	-2.00524	1.66876e-32	79.8737	-1.84886	2.32134e-34	71.0914	-1.7752
CGI_10000358	0.800037	1.02266	NS	0.911348	Crossover junction endonuclease MUS81	0.97		0.542047	0.0311879	59.0039	1.07628	1.32151e-06	53.5683	0.781785	0.00098939	56.3493	0.800037	0.765161	0.000438594	63.5214	1.29757	4.87358e-11	58.4515	1.00524	1.31645e-06	61.0898	1.02266	NS	NS	NS	0.593121	0.00392682	43.5253	NS	NS	NS	NS
CGI_10011936	0.899142	0.922525	NS	0.910834	glass-like	0.8125		0.983777	0.0022274	13.2898	0.9001	0.00244609	14.2308	0.813549	0.00601172	14.2509	0.899142	1.00484	0.00246408	13.2231	0.920005	0.00268237	14.147	0.842726	0.00528573	14.176	0.922525	NS	NS	NS	NS	NS	NS	NS	NS	NS	NS
CGI_10005354	0.845134	0.973781	NS	0.909457	steroid 17-alpha-hydroxylase 17,20 lyase-like [Crassostrea gigas]	0.7575		1.1432	1.50729e-35	399.447	0.418979	1.93204e-05	500.875	0.973225	3.25242e-21	423.322	0.845134	1.27172	2.11932e-42	415.042	0.545813	2.08527e-08	514.847	1.10381	9.72986e-27	439.218	0.973781	0.336007	0.000122204	287.365	-0.392632	1.03356e-05	386.454	NS	NS	NS	NS
CGI_10009889	0.915167	0.878859	NS	0.897013	Titin	0.614		0.596146	0.000287405	170.017	1.36184	9.20901e-11	146.583	0.787512	5.61943e-06	164.835	0.915167	0.563045	0.000454351	163.226	1.31873	1.35761e-10	140.264	0.754804	6.96372e-06	158.21	0.878859	NS	NS	NS	0.763894	0.00282337	112.473	NS	NS	NS	NS
CGI_10012797	0.870579	0.915844	NS	0.893211	myosin-2 heavy chain-like	0.72		0.811836	2.18317e-10	1090.89	0.963178	1.62488e-15	1094.68	0.836723	2.91023e-12	1107.02	0.870579	0.857279	7.93794e-18	1081.51	1.00606	1.00614e-28	1085.64	0.884193	2.01115e-23	1098.4	0.915844	NS	NS	NS	0.201549	0.00318357	812.771	NS	NS	NS	NS
CGI_10020296	1.08245	0.69784	NS	0.890147	BCL2 adenovirus E1B 19 kDa -interacting 3-like	0.635		0.953142	4.62418e-08	152.183	1.19799	8.73704e-12	149.8	1.09623	3.96563e-09	149.978	1.08245	0.569361	0.000679924	124.467	0.809587	1.0599e-06	121.166	0.714571	7.15954e-05	121.959	0.69784	NS	NS	NS	NS	NS	NS	NS	NS	NS	NS
CGI_10025093	0.895874	0.876486	NS	0.88618	cyclin-H-like isoform X1 [Biomphalaria glabrata]	0.795		0.539139	3.54119e-07	230.068	1.53421	2.97957e-33	189.84	0.614276	4.78723e-08	229.52	0.895874	0.523779	0.000101208	223.016	1.50401	2.2719e-23	183.785	0.601668	1.21056e-05	222.635	0.876486	-0.762211	5.69103e-09	151.773	NS	NS	NS	-0.683676	7.62095e-07	149.473	NS
CGI_10009312	0.820869	0.949594	NS	0.885231	fibrillin-1-like [Crassostrea gigas]	0.6045		0.632233	0.00188222	1620.82	0.65873	7.43731e-09	1684.01	1.17164	3.68074e-15	1453.97	0.820869	0.761442	0.000321991	1679.01	0.788764	1.12384e-08	1744.24	1.29858	1.93357e-15	1519.53	0.949594	NS	NS	NS	NS	NS	NS	0.544099	0.00632121	1119.63	NS
CGI_10006748	0.925077	0.839334	NS	0.882205	Ileal sodium bile acid cotransporter	0.6465		0.912756	0.000728955	18.7554	0.828404	0.00190831	19.9714	1.03407	0.000148706	18.5349	0.925077	0.830729	0.0027052	17.5765	0.740012	0.00711433	18.7303	0.947262	0.000575249	17.3596	0.839334	NS	NS	NS	NS	NS	NS	NS	NS	NS	NS
CGI_10012965	0.96072	0.787639	NS	0.874179	NLRC3- partial	0.4855		0.525721	1.72826e-08	2824.47	1.09115	1.70065e-29	2545.43	1.26529	2.35538e-41	2405.18	0.96072	0.355149	0.00187724	2568.5	0.914774	8.28133e-17	2289.21	1.09299	7.78892e-25	2158.27	0.787639	NS	NS	NS	0.4121	5.51128e-07	1936.03	0.592068	1.27027e-14	1806.03	NS
CGI_10012704	0.935702	0.810328	NS	0.873015	Neurogenic locus notch 3	0.7042		0.386004	0.000129784	215.319	1.70759	1.99709e-29	164.813	0.713508	0.000135829	199.376	0.935702	0.266768	0.0461254	200.231	1.56979	1.02138e-20	150.622	0.59443	0.00330999	184.608	0.810328	NS	NS	NS	1.30673	2.20532e-16	137.173	NS	NS	NS	NS
CGI_10010107	0.927655	0.808617	NS	0.868136	myosin heavy fast skeletal muscle-like	0.799		1.07881	1.80733e-39	333.229	0.929658	1.45625e-28	358.779	0.774498	3.41578e-17	365.63	0.927655	0.958226	6.33842e-17	307.823	0.808251	3.22548e-12	332.02	0.659375	6.30732e-08	339.236	0.808617	0.373465	9.32081e-06	251.253	0.220678	0.0169885	273.762	NS	NS	NS	NS
CGI_10017239	0.882481	0.84873	NS	0.865606	POC1 centriolar homolog A-like	0.932		1.35403	5.08768e-12	44.2217	0.717752	2.04005e-05	53.6045	0.575658	0.00220559	54.6073	0.882481	1.31197	2.09386e-09	42.6441	0.68479	0.000396827	51.7603	0.549434	0.00961005	52.7687	0.84873	0.555103	0.0427264	31.0533	NS	NS	NS	NS	NS	NS	NS
CGI_10011244	0.581152	1.14823	NS	0.864692	mantle N25	0.711		0.447935	0.011134	509.675	0.639174	8.92973e-05	502.331	0.656346	0.000158494	489.986	0.581152	1.01555	4.86597e-13	638.531	1.20484	1.0753e-19	636.911	1.2243	1.97893e-17	622.785	1.14823	NS	NS	NS	NS	NS	NS	NS	NS	NS	NS
CGI_10018693	0.927785	0.801146	NS	0.864465	nuclear mitotic apparatus 1-like	0.7355		0.786979	9.84966e-07	469.278	0.951969	1.19483e-18	470.342	1.04441	2.45611e-16	450.739	0.927785	0.663694	0.000577841	434.036	0.821742	3.30429e-08	434.144	0.918	1.39556e-08	415.859	0.801146	NS	NS	NS	NS	NS	NS	NS	NS	NS	NS
CGI_10016157	0.918652	0.808542	NS	0.863597	cation-transporting ATPase 13A3	0.663		0.760255	0.00029512	46.0146	0.851514	0.000261736	46.6126	1.14419	9.86656e-08	42.7479	0.918652	0.654967	0.00397832	42.7856	0.738347	0.00314993	43.2757	1.03231	5.03633e-06	39.5876	0.808542	NS	NS	NS	NS	NS	NS	NS	NS	NS	NS
CGI_10005325	0.961689	0.74015	NS	0.85092	Protocadherin Fat 4	0.627		0.771347	1.57329e-16	2440.25	1.13277	1.17613e-35	2330.59	0.980948	8.79195e-29	2365.07	0.961689	0.554982	0.00159848	2177.53	0.904145	3.9316e-08	2062.67	0.761325	3.79431e-06	2101.91	0.74015	NS	NS	NS	0.368181	0.00069981	1709.97	0.221916	0.0468602	1759.05	NS
CGI_10006242	0.854249	0.846215	NS	0.850232	hypothetical protein CGI_10006242	0.6465		0.509849	0.000104079	258.019	1.13343	2.36605e-21	229.303	0.919462	1.0865e-18	236.486	0.854249	0.521993	0.0443755	255.63	1.10693	2.21377e-06	227.834	0.909722	7.37303e-05	234.918	0.846215	NS	NS	NS	0.432094	0.00359469	172.264	NS	NS	NS	NS
CGI_10008313	0.973438	0.724899	NS	0.849169	hypothetical protein CGI_10008313	0.82		0.867781	7.32501e-11	149.347	1.01042	2.18006e-17	150.363	1.04212	1.26292e-14	146.27	0.973438	0.620612	3.98114e-06	130.423	0.757684	1.04502e-10	130.766	0.796401	2.51673e-09	127.198	0.724899	-0.388292	0.0168769	94.4665	NS	NS	NS	NS	NS	NS	NS
CGI_10014608	0.779117	0.91051	NS	0.844814	PREDICTED: uncharacterized protein LOC105337279 [Crassostrea gigas]	0.6433		0.884846	4.61179e-05	43.9595	0.668551	0.000453003	48.5603	0.783953	0.00480904	45.7768	0.779117	1.01663	1.90211e-05	45.9811	0.806636	0.00014298	50.5742	0.908262	0.00149916	47.8525	0.91051	NS	NS	NS	NS	NS	NS	NS	NS	NS	NS
CGI_10027747	0.54247	1.14151	NS	0.841992	Thioredoxin domain-containing 9	0.8115		0.891793	1.10775e-11	102.994	0.321069	0.0197434	125.765	0.414548	0.00801483	119.7	0.54247	1.49005	5.74015e-30	135.316	0.919836	4.53453e-13	158.892	1.01465	2.21068e-12	152.468	1.14151	0.524729	0.000677856	90.0156	NS	NS	NS	NS	NS	NS	NS
CGI_10004817	0.941292	0.724529	NS	0.83291	Collagen alpha-3(VI) chain	0.9433		0.569374	0.000151159	188.613	1.25299	4.47674e-15	165.985	1.00151	7.16202e-13	172.281	0.941292	0.353275	0.019291	167.856	1.03347	1.5758e-11	145.158	0.786843	2.41888e-09	151.74	0.724529	NS	NS	NS	0.706446	0.00114051	132.326	0.464188	0.0247745	139.56	NS
CGI_10015018	0.775742	0.88727	NS	0.831506	solute carrier family 26 member 6-like [Lingula anatina]	0.6745		0.890044	0.00201514	1072.71	0.694101	0.0408961	1172.28	0.74308	0.0309828	1132.35	0.775742	0.997441	7.61135e-10	1068.5	0.8025	7.89124e-07	1165.86	0.861871	5.6472e-07	1127.37	0.88727	0.411032	0.039084	866.714	NS	NS	NS	NS	NS	NS	NS
CGI_10013469	0.660572	0.983489	NS	0.822031	kunitz-type serine protease inhibitor Bi-KTI-like [Crassostrea gigas]	0.796		0.673201	5.62474e-11	134.824	0.88549	1.11201e-16	132.775	0.423025	0.000139806	147.566	0.660572	0.996572	3.34154e-22	152.086	1.20463	3.16943e-29	150.916	0.749263	3.29795e-12	165.061	0.983489	-0.419448	0.00806457	92.3714	NS	NS	NS	-0.663238	1.69947e-05	104.482	NS
CGI_10012199	0.722853	0.914034	NS	0.818444	zwilch homolog	0.542		0.880752	3.10536e-05	73.8726	0.672177	0.000139285	81.4524	0.615631	0.0010859	81.0835	0.722853	1.0728	2.28633e-09	78.4409	0.861176	2.31666e-09	86.0936	0.808124	1.45542e-07	85.6681	0.914034	NS	NS	NS	NS	NS	NS	NS	NS	NS	NS
CGI_10022807	0.842283	0.793166	NS	0.817725	28 kDa heat- and acid-stable phospho -like	0.815		0.621621	9.59984e-15	298.878	0.486835	5.78381e-07	322.527	1.41839	2.78395e-25	252.719	0.842283	0.574528	8.6812e-12	285.156	0.436689	1.61751e-05	307.956	1.36828	3.66967e-23	240.362	0.793166	-1.33992	7.67937e-14	166.196	-1.46883	8.82055e-16	184.832	-0.538531	0.0237163	115.998	-1.11576
CGI_10015942	0.643016	0.974242	NS	0.808629	hypothetical protein CGI_10015942	0.7635		0.673495	9.39123e-11	453.252	0.627934	3.99868e-06	476.96	0.627618	5.55286e-07	467.988	0.643016	1.00625	7.97441e-13	516.19	0.955372	3.11327e-09	542.289	0.961102	3.00928e-10	532.458	0.974242	-0.418227	0.00303503	311.042	-0.458927	0.00596987	329.132	-0.457604	0.00351716	322.96	-0.444919
CGI_10009628	0.473302	1.13474	NS	0.804022	neuronal acetylcholine receptor subunit alpha-9-like isoform X2 [Crassostrea gigas]	0.7695		0.554313	0.000762987	183.896	0.367819	0.0309838	202.446	0.497776	0.00115608	190.9	0.473302	1.21493	3.62113e-15	243.949	1.02619	1.89101e-11	264.552	1.1631	3.38474e-16	252.262	1.13474	0.341851	0.0163789	172.468	NS	NS	NS	0.284845	0.0253067	179.328	NS
CGI_10006400	0.866518	0.72395	NS	0.795234	glutamic acid-rich -like isoform X2	1		0.972317	2.08028e-12	890.13	0.606502	1.21931e-07	1019.66	1.02073	6.02904e-19	899.592	0.866518	0.830344	1.86165e-08	812.736	0.462096	0.000306004	936.527	0.879408	2.14924e-12	821.62	0.72395	0.552008	0.000195104	755.855	NS	NS	NS	0.598751	8.44729e-07	762.402	NS
CGI_10026852	0.859664	0.695197	NS	0.77743	vacuolar sorting-associated 13A-like	0.717		0.648038	1.67033e-24	2043.97	0.971054	6.69387e-51	1960.57	0.959899	1.30063e-36	1926.5	0.859664	0.486021	1.36345e-05	1863.93	0.802402	7.49855e-14	1777.43	0.797168	2.12028e-12	1748.33	0.695197	NS	NS	NS	0.293806	0.000125405	1510.46	0.289243	0.00115309	1485.64	NS
CGI_10011127	0.703576	0.849958	NS	0.776767	diphthine--ammonia ligase	0.675		0.565626	4.82798e-05	138.033	0.607767	0.000208833	141.734	0.937335	2.19312e-12	127.955	0.703576	0.714728	1.11196e-06	143.198	0.749882	9.56046e-06	147.184	1.08526	1.90515e-14	133.704	0.849958	NS	NS	NS	NS	NS	NS	NS	NS	NS	NS
CGI_10019176	0.822891	0.725265	NS	0.774078	NADPH:adrenodoxin mitochondrial	0.727		0.7855	3.08749e-24	376.304	0.678448	2.50848e-20	402.904	1.00472	5.17401e-28	364.183	0.822891	0.688209	1.96487e-20	350.606	0.578606	1.97133e-16	375.867	0.90898	7.04372e-25	338.783	0.725265	NS	NS	NS	NS	NS	NS	0.365392	0.000272262	282.951	NS
CGI_10018826	0.903015	0.641414	NS	0.772214	U3 small nucleolar ribonucleo IMP4	0.875		0.858849	2.29583e-13	369.721	0.852718	2.50641e-11	385.007	0.997478	8.78765e-18	364.848	0.903015	0.598045	0.000217289	321.918	0.589545	0.000534108	335.342	0.736652	3.01451e-06	316.765	0.641414	NS	NS	NS	NS	NS	NS	0.206799	0.0209064	266.945	NS
CGI_10022248	0.649307	0.889837	NS	0.769572	PREDICTED: uncharacterized protein LOC105337756	1		0.609511	0.00454198	45.5886	0.85383	9.63141e-07	44.7385	0.484579	0.00614629	48.4887	0.649307	0.849533	8.92221e-05	49.8304	1.08927	1.50429e-09	49.2165	0.730708	4.37548e-05	52.8195	0.889837	-4.29272	6.89799e-28	18.2142	-4.31391	1.26037e-27	16.2052	-4.63585	1.02793e-32	20.5953	-4.41416
CGI_10026142	0.566741	0.95864	NS	0.762691	stimulated by retinoic acid gene 6 homolog	0.654		0.338177	0.000135632	628.3	0.804193	1.96568e-13	572.796	0.557852	8.2794e-12	600.87	0.566741	0.731188	1.33112e-20	719.755	1.1913	3.31726e-31	669.942	0.953431	3.11713e-38	695.839	0.95864	-0.568382	1.49702e-09	474.92	NS	NS	NS	-0.348404	0.000234833	443.327	NS
CGI_10021624	0.656821	0.867567	NS	0.762194	Threonine dehydratase biosynthetic	0.6413		0.230612	0.0253874	159.922	0.957551	5.78789e-20	135.764	0.7823	2.09943e-13	138.965	0.656821	0.444756	8.42709e-05	169.579	1.1633	2.03051e-22	146.6	0.994643	1.58242e-16	149.59	0.867567	-0.564591	2.04491e-05	125.845	NS	NS	NS	NS	NS	NS	NS
CGI_10016078	0.562787	0.96103	NS	0.761908	Chromosome-associated kinesin KIF4A	0.7335		0.432045	0.0219923	253.648	0.603679	0.000124901	251.207	0.652635	9.73686e-05	242.874	0.562787	0.828315	2.00547e-10	292.135	1.00099	9.51339e-23	291.62	1.05378	2.1865e-20	282.813	0.96103	NS	NS	NS	NS	NS	NS	NS	NS	NS	NS
CGI_10009247	0.994582	0.500532	NS	0.747557	hypothetical protein CGI_10009247	0.622		0.849054	1.27622e-16	611.376	0.836283	3.09891e-27	639.157	1.29841	1.1716e-54	564.516	0.994582	0.357988	0.00685423	483.749	0.339218	0.00168171	506.337	0.804391	2.98315e-14	436.269	0.500532	NS	NS	NS	NS	NS	NS	0.693315	1.26148e-09	437.062	NS
CGI_10025355	0.491809	1.00312	NS	0.747466	arrestin domain-containing 3-like	0.6905		0.324978	9.28703e-05	425.476	0.709205	7.00557e-17	396.712	0.441244	3.1841e-08	419.399	0.491809	0.83688	9.79991e-27	513.321	1.21701	6.04662e-49	489.242	0.95548	2.97296e-36	509.852	1.00312	-0.192129	0.0490449	362.269	NS	NS	NS	NS	NS	NS	NS
CGI_10006241	0.535086	0.952971	NS	0.744029	CCAAT enhancer-binding zeta	0.55		0.563339	6.67271e-06	105.152	0.347091	0.0337407	116.637	0.694827	1.02031e-07	103.474	0.535086	0.981055	0.000232305	128.132	0.774823	0.00625814	140.349	1.10304	2.64723e-05	127.112	0.952971	NS	NS	NS	NS	NS	NS	0.376343	0.0373373	93.0959	NS
CGI_10023690	0.589545	0.890482	NS	0.740014	cysteine- acidic integral membrane -like	0.666		0.579995	0.010363	172.446	0.469554	0.00290239	186.26	0.719086	8.19546e-07	170.161	0.589545	0.875338	1.4525e-05	192.276	0.770505	6.20892e-09	206.73	1.0256	1.20487e-16	190.738	0.890482	NS	NS	NS	NS	NS	NS	NS	NS	NS	NS
CGI_10010355	0.926142	0.546674	NS	0.736408	WD repeat-containing 6	0.546		0.832136	2.35615e-15	288.026	1.06984	9.15837e-22	283.137	0.876444	5.61546e-17	290.924	0.926142	0.452753	6.74738e-06	238.082	0.687592	1.03122e-10	231.622	0.499675	5.07319e-07	240.227	0.546674	-0.221612	0.0355325	196.023	NS	NS	NS	NS	NS	NS	NS
CGI_10010841	0.838288	0.629847	NS	0.734068	Ubiquitin-like modifier-activating enzyme 1	0.832		0.732193	1.72367e-10	187.65	0.819395	7.56746e-16	191.15	0.963277	5.8354e-23	180.948	0.838288	0.524083	2.28856e-05	166.939	0.608141	2.2257e-08	169.705	0.757318	2.58557e-13	160.229	0.629847	NS	NS	NS	0.270779	0.0289734	156.209	0.419321	0.00019344	146.552	NS
CGI_10017614	0.796271	0.664238	NS	0.730255	PREDICTED: uncharacterized protein C19orf47-like isoform X1 [Crassostrea gigas]	0.6005		0.819567	6.66195e-14	245.279	0.783646	7.25525e-12	257.287	0.785601	4.71063e-15	252.467	0.796271	0.688288	1.07524e-10	225.478	0.648802	7.90793e-09	236.64	0.655625	1.34479e-11	232.398	0.664238	NS	NS	NS	NS	NS	NS	NS	NS	NS	NS
CGI_10024943	0.656171	0.787335	NS	0.721753	glutamyl-tRNA(Gln) amidotransferase subunit mitochondrial	0.802		0.513092	0.00318647	93.5013	0.811013	2.4836e-07	89.7866	0.644407	0.000632482	91.7033	0.656171	0.647322	0.000778379	96.8308	0.937226	1.41559e-07	93.4555	0.777456	0.000140755	95.3036	0.787335	NS	NS	NS	0.452387	0.00130222	78.8424	NS	NS	NS	NS
CGI_10002169	0.911825	0.511783	NS	0.711804	DNA-directed RNA polymerase III subunit RPC8	0.833		1.10579	5.9028e-14	70.3869	0.782227	4.79455e-09	79.2404	0.847457	2.82538e-09	76.3	0.911825	0.703386	0.000184274	57.213	0.380264	0.0369694	65.3793	0.4517	0.0160311	62.7777	0.511783	NS	NS	NS	NS	NS	NS	NS	NS	NS	NS
CGI_10016652	0.665742	0.734568	NS	0.700155	fibrillin-1-like [Crassostrea gigas]	0.5985		0.494148	0.00753333	2070.78	1.00988	1.04191e-15	1887.35	0.493193	0.00125247	2116.58	0.665742	0.57041	0.0307674	2105.44	1.06093	1.21952e-06	1930.58	0.572361	0.0186518	2153.91	0.734568	-0.550721	0.00164127	1463.52	NS	NS	NS	-0.562824	7.9877e-05	1497.42	NS
CGI_10012128	0.60485	0.788438	NS	0.696644	---NA---	0		0.3005	0.000513331	432.737	0.76619	2.8335e-23	394.377	0.747861	8.10255e-13	387.979	0.60485	0.487164	2.13782e-05	454.289	0.946182	8.55127e-19	418.27	0.931968	1.47092e-13	411.772	0.788438	-0.492102	1.61541e-08	339.44	NS	NS	NS	NS	NS	NS	NS
CGI_10018463	0.757025	0.634173	NS	0.695599	helicase POLQ-like	0.754		0.531377	0.000623434	179.069	0.579411	1.50868e-05	183.968	1.16029	2.02469e-23	156.349	0.757025	0.412116	0.0375224	166.069	0.456619	0.0106785	170.54	1.03378	1.6773e-11	143.913	0.634173	NS	NS	NS	NS	NS	NS	0.709548	2.45282e-11	129.783	NS
CGI_10009126	0.830093	0.556793	NS	0.693443	dynein assembly factor axonemal	0.5975		0.842647	1.11322e-08	209.546	0.820852	1.21261e-15	219.667	0.82678	3.45726e-19	215.541	0.830093	0.572555	0.00026661	181.193	0.543835	8.80447e-07	190.133	0.553989	2.72153e-08	186.729	0.556793	NS	NS	NS	NS	NS	NS	NS	NS	NS	NS
CGI_10008238	0.762246	0.606153	NS	0.6842	receptor-type tyrosine- phosphatase T-like	0.589		0.505895	4.87811e-05	1009.47	0.878514	7.67577e-15	951.039	0.90233	7.11338e-24	928.21	0.762246	0.350243	0.00268624	922.25	0.719657	7.96044e-13	862.825	0.748559	2.62685e-26	842.539	0.606153	NS	NS	NS	0.477672	0.00533	822.661	0.504616	0.00109595	802.511	NS
CGI_10005908	0.942725	0.417129	NS	0.679927	von Willebrand factor D and EGF domain-containing -like	0.576		0.985731	7.19843e-26	1277.83	0.973827	9.50504e-20	1332.88	0.868618	1.30266e-13	1339.79	0.942725	0.459372	7.94432e-06	988.506	0.445358	0.000135919	1031.64	0.346657	0.00795951	1044.15	0.417129	NS	NS	NS	NS	NS	NS	NS	NS	NS	NS
CGI_10008568	0.879537	0.460529	NS	0.670033	hypothetical protein CGI_10008568	0.955		0.825774	9.15315e-11	143.365	1.00585	3.15073e-21	143.087	0.806987	1.26329e-12	147.31	0.879537	0.408842	0.00386506	116.777	0.582508	3.04734e-07	115.572	0.390238	0.0017393	120.219	0.460529	NS	NS	NS	NS	NS	NS	NS	NS	NS	NS
CGI_10019884	0.630264	0.705432	NS	0.667848	PREDICTED: uncharacterized protein LOC105326636	0.747		0.600329	2.16268e-06	91.0313	0.809904	6.27161e-10	89.6221	0.480559	0.000722805	96.055	0.630264	0.676232	2.42866e-07	91.7206	0.881183	5.71587e-11	90.4563	0.558881	0.000103985	96.7434	0.705432	0.395483	0.0271067	85.9325	0.59778	0.00072739	84.1599	NS	NS	NS	NS
CGI_10001812	0.768223	0.561857	NS	0.66504	hypothetical protein CGI_10001812	0.9367		0.623754	0.00427395	88.9212	1.00798	1.48867e-07	83.9106	0.672934	0.000800655	89.535	0.768223	0.419391	0.0452483	79.19	0.798862	5.03247e-06	74.031	0.467318	0.0128426	79.7202	0.561857	NS	NS	NS	NS	NS	NS	NS	NS	NS	NS
CGI_10025251	0.814478	0.512961	NS	0.663719	translation factor mitochondrial	0.7605		0.718436	6.35125e-11	194.918	1.07095	3.11885e-23	186.052	0.654045	2.50402e-10	202.449	0.814478	0.41773	0.000286308	167.366	0.766208	3.04567e-12	157.85	0.354946	0.00119341	174.394	0.512961	NS	NS	NS	0.27572	0.0124998	135.515	NS	NS	NS	NS
CGI_10003080	0.859268	0.465538	NS	0.662403	cilia- and flagella-associated 43-like	0.795		1.01374	2.08066e-10	144.2	0.920455	6.89922e-09	153.437	0.64361	7.08296e-05	161.805	0.859268	0.62364	6.28755e-08	117.018	0.522906	7.4427e-06	125.086	0.250069	0.045892	133.784	0.465538	NS	NS	NS	NS	NS	NS	-0.451863	0.0165366	110.714	NS
CGI_10001561	0.717823	0.605614	NS	0.661719	cartilage matrix -like	0.7015		0.636324	0.000879802	138.549	0.862994	7.44903e-07	135.778	0.654153	3.55591e-05	140.992	0.717823	0.525217	0.00425698	128.371	0.746966	5.62585e-06	125.425	0.544659	0.000217918	130.759	0.605614	NS	NS	NS	NS	NS	NS	NS	NS	NS	NS
CGI_10028729	0.801166	0.519456	NS	0.660311	[Nematostella vectensis]	0.579		0.739489	1.58764e-06	128.14	0.635509	1.06106e-07	137.648	1.0285	5.71792e-17	122.046	0.801166	0.46136	0.00914332	110.88	0.350262	0.0144079	119.558	0.746745	5.87169e-08	104.736	0.519456	-1.15558	8.47595e-09	69.5602	-1.29348	1.26677e-15	76.8201	-0.896174	3.10119e-07	62.0463	-1.11508
CGI_10019732	0.847656	0.472746	NS	0.660201	vacuole membrane 1	0.7025		0.68957	9.23583e-10	583.425	0.689353	4.75834e-12	607.582	1.16404	6.79867e-33	531.507	0.847656	0.315815	0.00545185	486.651	0.311206	0.00131887	506.93	0.791217	1.28272e-19	434.734	0.472746	NS	NS	NS	NS	NS	NS	0.276445	0.00683209	369.551	NS
CGI_10011904	0.683486	0.634048	NS	0.658767	cyclic nucleotide-gated cation channel beta-1-like	0.7285		0.713724	6.83905e-17	252.855	0.587258	3.21398e-11	272.463	0.749476	3.70575e-14	255.253	0.683486	0.664518	1.5504e-15	241.005	0.535371	5.04266e-10	259.888	0.702254	2.55349e-13	243.432	0.634048	NS	NS	NS	NS	NS	NS	NS	NS	NS	NS
CGI_10009180	0.544436	0.765423	NS	0.654929	SCO-spondin-like isoform X3	0.5535		0.577715	7.07011e-05	2362.82	0.397394	0.010827	2593.28	0.6582	0.000363334	2352.99	0.544436	0.801203	1.25249e-09	2536.84	0.6169	8.43472e-06	2770.35	0.878165	2.70723e-07	2533.76	0.765423	-0.346928	0.019049	1721.1	-0.530726	0.000237947	1929.06	NS	NS	NS	NS
CGI_10016875	0.666373	0.642002	NS	0.654187	probable secreted beta-glucosidase adg3	0.5535		0.628704	0.000237623	48.7505	0.687309	2.7907e-05	50.0034	0.683105	8.17781e-05	48.8877	0.666373	0.605377	0.000542948	47.0501	0.659717	8.773e-05	48.2545	0.660912	0.000167876	47.2135	0.642002	NS	NS	NS	NS	NS	NS	NS	NS	NS	NS
CGI_10014589	0.585633	0.719927	NS	0.65278	myb X isoform X1	1		0.538717	2.4938e-05	153.268	0.734321	2.80158e-09	151.192	0.48386	0.00136305	158.769	0.585633	0.674506	2.47068e-05	158.898	0.863764	2.51378e-08	157.274	0.621511	0.000412653	164.563	0.719927	NS	NS	NS	NS	NS	NS	NS	NS	NS	NS
CGI_10005910	0.858224	0.447027	NS	0.652626	von Willebrand factor D and EGF domain-containing -like	0.5875		0.949936	1.41012e-17	1976.48	0.852202	1.18992e-11	2105.39	0.772534	1.61178e-11	2108.3	0.858224	0.538574	3.33872e-05	1606	0.439018	0.00261877	1718.49	0.36349	0.00740091	1728.55	0.447027	NS	NS	NS	NS	NS	NS	NS	NS	NS	NS
CGI_10009087	0.629732	0.667781	NS	0.648756	ammonium transporter 1	0.653		0.188869	0.0313002	4162.03	1.23285	5.51669e-45	3282.38	0.467478	1.76786e-08	3895.65	0.629732	0.22709	0.00371639	4109.93	1.26813	6.843e-55	3255.19	0.508125	1.67285e-11	3854.66	0.667781	-0.243863	0.019655	3671.78	0.793379	1.51154e-14	2745.06	NS	NS	NS	NS
CGI_10000418	0.688804	0.584108	NS	0.636456	meiosis-specific nuclear structural 1-like	0.8335		0.717984	2.37553e-11	179.968	0.61929	8.3345e-10	192.219	0.729137	1.13922e-09	182.955	0.688804	0.613274	5.78753e-07	167.79	0.512488	1.09821e-05	179.424	0.626561	2.68252e-06	170.678	0.584108	NS	NS	NS	-0.278736	0.0299781	141.342	NS	NS	NS	NS
CGI_10001170	0.598703	0.663958	NS	0.63133	pyruvate dehydrogenase E1 component subunit mitochondrial	0.8835		0.52087	0.000123577	180.98	0.524387	0.000178865	187.93	0.750851	6.47714e-08	173.067	0.598703	0.587119	3.9609e-08	180.976	0.58619	2.5116e-07	187.972	0.818565	6.19098e-13	173.553	0.663958	NS	NS	NS	NS	NS	NS	0.248822	0.0398894	143.772	NS
CGI_10013614	0.563437	0.69673	NS	0.630084	MIT domain-containing 1-like [Lingula anatina]	0.7975		0.725015	6.83519e-12	140.733	0.419456	9.71355e-05	159.764	0.545841	1.35359e-06	150.618	0.563437	0.858201	7.17997e-15	145.42	0.550486	6.20173e-07	164.282	0.681503	3.84245e-09	155.33	0.69673	NS	NS	NS	NS	NS	NS	NS	NS	NS	NS
CGI_10026352	0.583172	0.670932	NS	0.627052	hypothetical protein CGI_10026352	0.895		0.598504	5.5084e-07	883.446	0.564246	4.15437e-07	928.891	0.586768	3.65965e-06	904.755	0.583172	0.686823	4.87199e-08	894.333	0.649584	3.39613e-08	939.822	0.676389	2.08103e-07	916.272	0.670932	0.280932	0.0358483	795.901	NS	NS	NS	NS	NS	NS	NS
CGI_10006932	0.654554	0.593896	NS	0.624225	probable methyltransferase TARBP1	0.5745		0.59561	0.00343665	109.984	0.602364	1.67529e-05	114.814	0.765689	0.00023916	107.239	0.654554	0.535321	0.00767975	104.197	0.541155	5.4344e-05	108.791	0.70521	0.000534176	101.541	0.593896	NS	NS	NS	NS	NS	NS	NS	NS	NS	NS
CGI_10002143	0.564107	0.671272	NS	0.617689	epidermal growth factor receptor-like isoform X1	0.5325		0.773884	4.25301e-23	1145.83	0.339303	3.08935e-05	1348.28	0.579135	2.34234e-10	1231.38	0.564107	0.878654	7.7798e-13	1174.88	0.44658	0.000515146	1374.42	0.688581	1.17168e-07	1260.24	0.671272	NS	NS	NS	-0.505476	8.70455e-14	1039.27	-0.258227	0.00384338	925.923	NS
CGI_10008548	0.606946	0.625134	NS	0.61604	excitatory amino acid transporter-like [Crassostrea gigas]	0.5625		0.491418	0.00284067	236.18	0.716235	7.92388e-06	230.966	0.613185	0.000113954	232.84	0.606946	0.509552	0.000163849	231.453	0.732494	3.30837e-08	226.37	0.633356	1.13196e-06	228.38	0.625134	-0.354502	0.0176344	177.706	NS	NS	NS	NS	NS	NS	NS
CGI_10012418	0.368298	0.863741	NS	0.61602	Sperm-associated antigen 7	0.7565		0.395826	0.0029868	188.636	0.220018	0.0468474	207.746	0.489051	2.24383e-05	187.391	0.368298	0.889036	1.7756e-15	226.886	0.715059	1.93348e-16	247.24	0.987128	3.38819e-24	226.75	0.863741	0.272464	0.035565	184.122	NS	NS	NS	0.367293	0.000674806	182.658	NS
CGI_10020609	0.483803	0.747022	NS	0.615412	hypothetical protein CGI_10020609	0.7325		0.694411	5.25686e-09	334.547	0.285474	0.0059217	392.256	0.471524	6.41338e-06	363.578	0.483803	0.954362	1.94316e-11	368.124	0.549213	2.14085e-05	426.007	0.737489	1.68503e-08	397.632	0.747022	0.674463	4.75313e-06	340.945	NS	NS	NS	0.456405	0.000877313	370.727	NS
CGI_10005522	0.539702	0.666261	NS	0.602981	transmembrane 145 isoform X2	0.6915		0.699968	8.28672e-11	246.75	0.583391	2.16538e-10	265.401	0.335748	0.000787518	279.833	0.539702	0.825582	1.20999e-10	254.903	0.706738	6.14498e-10	273.635	0.466462	0.000107902	287.593	0.666261	0.323997	0.00319897	216.556	0.20191	0.0367156	234.17	NS	NS	NS	NS
CGI_10000504	0.579218	0.622391	NS	0.600805	arginine--tRNA cytoplasmic	0.7635		0.342198	0.0332515	87.8265	1.08737	8.24132e-12	74.8132	0.308082	0.0386018	90.703	0.579218	0.386455	0.0119311	87.1857	1.12662	2.03981e-13	74.5729	0.354097	0.0122856	90.0862	0.622391	NS	NS	NS	0.965269	5.35103e-10	72.416	NS	NS	NS	NS
CGI_10005681	0.525617	0.673041	NS	0.599329	proline-rich transmembrane 1-like	0.67		0.46372	0.00188279	221.583	0.348277	0.0360889	238.818	0.764855	0.000117361	207.112	0.525617	0.613821	5.32536e-06	229.699	0.494273	0.000954676	247.03	0.911028	9.48954e-07	216.041	0.673041	-0.429801	0.0148528	164.802	-0.546516	0.00222341	179.9	NS	NS	NS	NS
CGI_10005037	0.849986	0.346573	NS	0.59828	DNA-directed RNA polymerase III subunit RPC8 isoform X2	0.734		0.84597	1.44084e-23	422.018	0.749522	1.1659e-17	450.036	0.954465	1.31253e-26	419.452	0.849986	0.342359	3.27082e-05	332.488	0.243351	0.00693672	356.646	0.454011	1.31809e-07	328.639	0.346573	-0.277262	0.00102222	280.985	-0.376926	1.1296e-05	303.596	NS	NS	NS	NS
CGI_10004012	0.644354	0.549963	NS	0.597158	[Nematostella vectensis]	0.5935		1.04113	1.55721e-16	1534.39	0.417647	0.000112279	1885.1	0.474282	0.000197771	1816.53	0.644354	0.946916	2.31395e-14	1429.3	0.320556	0.00301118	1768.13	0.382416	0.00253179	1703.57	0.549963	0.41889	0.00367818	1194.76	NS	NS	NS	NS	NS	NS	NS
CGI_10010520	0.544828	0.644767	NS	0.594797	WW domain-binding 4-like	0.6855		0.545707	1.56361e-08	242.172	0.583609	2.57814e-05	248.908	0.505167	6.1669e-07	249.819	0.544828	0.647298	2.55626e-13	245.727	0.678735	2.07159e-07	252.68	0.608268	3.86197e-11	253.567	0.644767	NS	NS	NS	NS	NS	NS	NS	NS	NS	NS
CGI_10016886	0.717964	0.471144	NS	0.594554	Cell adhesion molecule 3	0.6522		0.701373	2.10297e-07	308.352	0.737039	7.84662e-06	317.548	0.715481	8.58852e-07	313.51	0.717964	0.454728	0.00666366	270.983	0.488406	0.0114837	278.713	0.470298	0.00690694	275.58	0.471144	-0.735213	6.99497e-09	190.606	-0.68944	2.21734e-05	194.936	-0.715723	3.02098e-07	193.284	-0.713458
CGI_10008716	0.663887	0.517121	NS	0.590504	glycine--tRNA ligase-like	0.841		0.841272	5.85979e-05	171.633	0.60227	0.00197065	190.817	0.54812	0.002691	190.266	0.663887	0.694237	0.00170478	156.208	0.45275	0.0346892	174.532	0.404376	0.0431847	174.302	0.517121	NS	NS	NS	NS	NS	NS	NS	NS	NS	NS
CGI_10004201	0.675016	0.504901	NS	0.589959	FAM69C-like [Lingula anatina]	0.554		0.560053	1.17046e-05	164.297	0.756448	1.31446e-10	162.133	0.708547	1.23172e-08	160.975	0.675016	0.390939	0.00522024	149.267	0.583131	3.06966e-06	146.707	0.540633	4.31755e-05	145.914	0.504901	NS	NS	NS	NS	NS	NS	NS	NS	NS	NS
CGI_10008294	0.590353	0.585693	NS	0.588023	seleno O-like	0.763		0.972616	5.61191e-12	143.046	0.408416	0.00249445	173.59	0.390028	0.00715415	171.18	0.590353	0.969161	8.02371e-15	138.786	0.400431	0.000592018	168.477	0.387486	0.00218222	166.269	0.585693	0.743127	1.41176e-10	131.563	NS	NS	NS	NS	NS	NS	NS
CGI_10002760	0.53156	0.633595	NS	0.582578	hypothetical protein CGI_10002760	0.6065		0.491846	0.000532381	85.1055	0.624558	7.17801e-07	85.5202	0.478277	0.000215877	87.3265	0.53156	0.595177	0.000630406	86.9393	0.721736	3.18517e-06	87.5071	0.583873	0.000220354	89.2609	0.633595	NS	NS	NS	NS	NS	NS	NS	NS	NS	NS
CGI_10016100	0.530154	0.628989	NS	0.579571	calcium calmodulin-dependent kinase kinase 1-like isoform X1 [Crassostrea gigas]	0.9133		0.391083	0.00182986	130.848	0.665474	1.03608e-07	125.863	0.533905	3.52627e-05	128.069	0.530154	0.489887	9.15678e-06	132.586	0.761621	9.12165e-12	127.929	0.635458	2.58198e-08	130.084	0.628989	NS	NS	NS	0.391432	0.00416877	115.143	NS	NS	NS	NS
CGI_10008958	0.481227	0.67691	NS	0.579068	TRMT1- partial	0.553		0.496631	1.34773e-07	581.096	0.303262	0.00847254	641.28	0.643787	3.80791e-11	569.056	0.481227	0.693082	2.74163e-10	615.383	0.496728	6.11584e-05	675.947	0.84092	2.31603e-14	605.063	0.67691	-0.215307	0.0104937	458.433	-0.410115	2.64074e-05	514.551	NS	NS	NS	NS
CGI_10022275	0.609267	0.542901	NS	0.576084	DNA replication licensing factor mcm4	0.8985		0.65211	0.00017422	129.111	0.745774	2.01503e-05	130.926	0.429915	0.0281516	140.609	0.609267	0.586815	0.000160652	121.913	0.675935	1.85471e-05	123.537	0.365952	0.0432913	133.155	0.542901	NS	NS	NS	NS	NS	NS	NS	NS	NS	NS
CGI_10027413	0.773529	0.378547	NS	0.576038	Condensin-2 complex subunit H2	0.575		0.815971	5.0286e-12	185.364	0.760763	1.13606e-12	195.622	0.743853	7.94138e-12	192.746	0.773529	0.420886	0.00435964	152.341	0.363282	0.00797525	161.212	0.351472	0.010494	159.056	0.378547	NS	NS	NS	NS	NS	NS	NS	NS	NS	NS
CGI_10009589	0.547375	0.591773	NS	0.569574	hypothetical protein CGI_10009589	0.5989		0.900786	5.61831e-24	179.271	0.393603	9.16835e-06	214.009	0.347737	6.04838e-05	213.108	0.547375	0.944507	3.39799e-24	178.165	0.435765	2.57251e-06	212.15	0.395048	1.04345e-05	211.339	0.591773	0.75367	1.87404e-10	172.283	NS	NS	NS	NS	NS	NS	NS
CGI_10008106	0.618136	0.516111	NS	0.567123	Canalicular multispecific organic anion transporter partial	0.7555		0.780258	1.98523e-14	1438.07	0.70305	3.51328e-12	1526.91	0.3711	0.000141728	1646.36	0.618136	0.678711	7.4362e-13	1338.55	0.598184	2.67958e-10	1422.72	0.271439	0.00302847	1541.28	0.516111	0.238121	0.00228425	1177.65	NS	NS	NS	-0.173675	0.0077923	1385.27	NS
CGI_10024133	0.493838	0.63927	NS	0.566554	ATP-dependent zinc metalloprotease partial	0.6675		0.416277	0.0018806	212.884	0.681158	0.000203476	204.464	0.384079	0.00890555	219.334	0.493838	0.564269	3.37569e-10	219.648	0.820136	1.61282e-07	211.991	0.533405	3.81866e-07	226.382	0.63927	NS	NS	NS	0.411281	0.014526	186.754	NS	NS	NS	NS
CGI_10027648	0.580109	0.552328	NS	0.566218	probable pyruvate dehydrogenase E1 component subunit mitochondrial	0.833		0.63146	6.34923e-13	739.172	0.437379	0.000167576	812.14	0.671488	6.67949e-09	745.086	0.580109	0.604288	1.22823e-13	711.082	0.406846	0.000338471	781.904	0.645848	8.52541e-09	717.345	0.552328	NS	NS	NS	-0.445919	0.00606447	609.812	NS	NS	NS	NS
CGI_10002290	0.61117	0.518832	NS	0.565001	multiple epidermal growth factor-like domains 10	0.7195		0.447611	0.0013209	367.403	0.595986	0.000165524	366.121	0.789912	3.85089e-07	340.665	0.61117	0.357147	0.0273417	345.263	0.501246	0.00410914	343.445	0.698103	3.25584e-05	319.131	0.518832	-1.05495	7.25851e-17	233.946	-0.899524	3.27721e-09	226.867	-0.700346	8.32059e-06	203.555	-0.884941
CGI_10005492	0.544029	0.578667	NS	0.561348	FAM207A-like isoform X2 [Lingula anatina]	0.6547		0.523275	0.000117999	147.796	0.69731	2.89014e-05	146.002	0.411501	0.00672784	155.645	0.544029	0.55912	0.000464857	146.097	0.726223	8.65244e-05	144.466	0.450659	0.00954177	153.93	0.578667	0.255041	0.0335067	135.774	0.425908	0.00658692	133.275	NS	NS	NS	NS
CGI_10015199	0.5466	0.569921	NS	0.558261	uncharacterized threonine-rich GPI-anchored glyco -like	1		0.329433	0.000138442	708.033	0.811262	3.27541e-20	643.5	0.499105	4.18645e-13	686.877	0.5466	0.354281	0.00109598	696.657	0.830193	3.28565e-15	634.046	0.525289	9.31453e-09	676.689	0.569921	NS	NS	NS	0.61578	1.10969e-10	606.789	0.308843	0.000110565	652.527	NS
CGI_10012224	0.599278	0.515114	NS	0.557196	hypothetical protein CGI_10012224	0.618		0.411357	0.000182808	811.055	0.711096	6.47316e-12	775.345	0.67538	8.31477e-10	767.162	0.599278	0.327217	0.000882919	763.273	0.62453	9.06807e-12	727.526	0.593595	2.55643e-09	720.725	0.515114	NS	NS	NS	0.261867	0.00509935	661.804	0.231826	0.0261682	656.193	NS
CGI_10013827	0.610199	0.503202	NS	0.556701	DD3-3-like	0.719		0.506465	1.04495e-06	804.532	0.600985	3.45983e-08	814.815	0.723148	3.8698e-09	772.465	0.610199	0.400548	0.00407511	751.218	0.491292	0.000470823	760.001	0.617767	3.38159e-05	720.047	0.503202	NS	NS	NS	NS	NS	NS	NS	NS	NS	NS
CGI_10027087	0.63496	0.476153	NS	0.555557	Trehalase	0.621		0.752328	4.54493e-26	800.661	0.656324	1.25597e-25	854.754	0.496229	8.85586e-15	876.719	0.63496	0.592549	7.52678e-07	729.939	0.494933	1.60938e-05	780.55	0.340976	0.00411166	803.379	0.476153	NS	NS	NS	NS	NS	NS	NS	NS	NS	NS
CGI_10008042	0.434715	0.675789	NS	0.555252	ATP-binding cassette sub-family G member 2-like	0.767		0.535107	2.81154e-12	714.321	0.528911	2.34728e-07	743.825	0.240127	0.00146513	796.905	0.434715	0.776538	3.82642e-22	771.379	0.765927	1.54561e-13	803.231	0.484904	1.95064e-10	853.979	0.675789	NS	NS	NS	NS	NS	NS	-0.204318	0.0338014	698.352	NS
CGI_10009510	0.639064	0.469065	NS	0.554065	ubiquitin-conjugating enzyme E2 G2	0.9405		0.556668	4.20367e-15	397.751	0.706361	1.57909e-23	397.202	0.654163	1.66123e-13	394.702	0.639064	0.386897	0.000151718	361.881	0.533245	6.97659e-08	360.348	0.487053	2.7814e-05	358.718	0.469065	NS	NS	NS	NS	NS	NS	NS	NS	NS	NS
CGI_10016468	0.529318	0.575405	NS	0.552361	PREDICTED: uncharacterized protein C9orf117 homolog [Crassostrea gigas]	0.7365		0.577591	0.0118977	39.1785	0.52456	0.0176259	41.5545	0.485802	0.0181169	41.2471	0.529318	0.624857	0.00570169	39.112	0.567637	0.00942567	41.4599	0.533719	0.00793683	41.1702	0.575405	NS	NS	NS	NS	NS	NS	NS	NS	NS	NS
CGI_10017402	0.385429	0.695432	NS	0.54043	amyloid -binding 2	0.796		0.436882	4.61336e-07	484.918	0.367381	7.37619e-05	515.262	0.352025	6.90041e-05	507.731	0.385429	0.74733	2.75626e-33	537.426	0.67443	5.51918e-24	569.571	0.664535	4.03559e-27	561.377	0.695432	NS	NS	NS	NS	NS	NS	NS	NS	NS	NS
CGI_10023419	0.548928	0.514158	NS	0.531543	probable tRNA N6-adenosine mitochondrial	0.7185		0.467957	0.00259271	71.5613	0.68057	1.09274e-05	70.1442	0.498256	0.00214837	72.5592	0.548928	0.436568	0.0279371	68.8124	0.640955	0.000853893	67.3867	0.46495	0.0206685	69.8093	0.514158	NS	NS	NS	NS	NS	NS	NS	NS	NS	NS
CGI_10025124	0.434019	0.625401	NS	0.52971	NACHT domain- and WD repeat-containing 1-like	0.6235		0.368987	0.00116044	476.25	0.566528	8.77729e-07	467.643	0.366542	0.00557625	485.919	0.434019	0.561276	2.97362e-07	501.732	0.754957	1.63839e-11	494.819	0.55997	7.90103e-06	512.279	0.625401	NS	NS	NS	NS	NS	NS	NS	NS	NS	NS
CGI_10027535	0.445089	0.60731	NS	0.5262	[Nematostella vectensis]	0.5585		0.548378	1.24803e-11	2413.18	0.308104	0.00201945	2697.2	0.478786	1.80083e-05	2510.81	0.445089	0.708587	2.38121e-05	2535.87	0.471386	0.009034	2819.58	0.641957	0.000336724	2635.95	0.60731	NS	NS	NS	NS	NS	NS	NS	NS	NS	NS
CGI_10026053	0.454367	0.594206	NS	0.524286	60 kDa SS-A Ro ribonucleo	0.6185		0.440688	9.69023e-12	1277.31	0.26342	0.00130378	1402.42	0.658991	6.45593e-20	1224.81	0.454367	0.580644	2.03241e-09	1319.06	0.402118	0.000207642	1444	0.799854	1.37764e-15	1270.67	0.594206	0.300586	7.77542e-07	1238.98	NS	NS	NS	0.520776	1.56034e-14	1183.81	NS
CGI_10027273	0.464954	0.576476	NS	0.520715	transcriptional regulator ATRX isoform X2	0.748		0.456724	1.543e-07	1664.56	0.403834	2.32926e-05	1758.9	0.534306	1.92931e-06	1659.25	0.464954	0.568705	7.07922e-07	1699.79	0.5135	2.21276e-05	1795.13	0.647222	8.70104e-07	1697.63	0.576476	NS	NS	NS	NS	NS	NS	NS	NS	NS	NS
CGI_10010395	0.677393	0.358041	NS	0.517717	tetraspanin-9-like [Aplysia californica]	0.5445		0.593786	5.23606e-17	2596.29	0.871729	8.29323e-32	2511.65	0.566663	2.54326e-21	2670.11	0.677393	0.274902	4.14818e-05	2223.88	0.549905	6.29129e-16	2129.08	0.249315	1.25265e-06	2291.07	0.358041	NS	NS	NS	0.340569	0.0211005	2064.58	NS	NS	NS	NS
CGI_10022156	0.407786	0.623025	NS	0.515406	leucine-rich repeat-containing 15-like	0.552		0.434296	0.00429047	994.839	0.337315	0.00156678	1067.71	0.451747	0.000189396	1010.63	0.407786	0.647973	1.11876e-05	1060.74	0.551463	2.28343e-07	1135.52	0.669639	3.03776e-08	1079.09	0.623025	NS	NS	NS	NS	NS	NS	NS	NS	NS	NS
CGI_10005243	0.491018	0.522218	NS	0.506618	vitamin D3 hydroxylase-associated -like	0.6325		0.405696	0.016867	473.503	0.445062	0.0161061	486.411	0.622295	0.000106905	453.45	0.491018	0.436362	1.10428e-06	465.365	0.472246	0.000137078	478.227	0.658046	8.3522e-14	446.351	0.522218	NS	NS	NS	NS	NS	NS	0.443838	0.000110658	429.673	NS
CGI_10007401	0.396399	0.615192	NS	0.505796	novel containing four WD G-beta repeats [Xenopus tropicalis]	0.612		0.551642	4.88946e-10	317.355	0.222311	0.00403992	365.068	0.415244	6.44873e-07	337.216	0.396399	0.769984	5.90486e-20	339.287	0.439011	4.22695e-10	387.005	0.636583	1.97971e-16	359.514	0.615192	0.484594	4.21509e-07	316.44	NS	NS	NS	0.350126	0.000100099	336.612	NS
CGI_10022473	0.386503	0.621631	NS	0.504067	epidermal growth factor receptor isoform X2	0.6635		0.476688	5.50271e-11	1123.77	0.469884	1.48271e-11	1171.75	0.212936	0.0170639	1243.24	0.386503	0.710576	4.09128e-08	1212.46	0.701371	3.48425e-08	1263.98	0.452945	0.0010081	1331.99	0.621631	-0.16532	0.0405641	909.601	-0.176241	0.021296	948.972	-0.42666	2.092e-07	1027.01	-0.256074
CGI_10022183	0.533826	0.462674	NS	0.49825	Coiled-coil domain-containing 47	0.7		0.422981	1.41114e-05	1473.32	0.742182	3.25222e-11	1400.66	0.436315	1.9021e-05	1497.11	0.533826	0.352094	0.000103468	1393.89	0.668082	5.31409e-10	1321.78	0.367848	0.000141307	1417.43	0.462674	NS	NS	NS	0.364774	9.69781e-05	1226.38	NS	NS	NS	NS
CGI_10021945	0.504228	0.482507	NS	0.493367	peripheral plasma membrane CASK-like isoform X5	0.909		0.526947	0.000145635	274.67	0.609982	6.94285e-07	279.32	0.375754	0.00390925	293.374	0.504228	0.505393	9.42418e-05	264.8	0.58566	2.07069e-07	269.255	0.356467	0.00257188	283.131	0.482507	0.267943	0.0216354	253.3	0.346398	0.000290005	256.891	NS	NS	NS	NS
CGI_10007101	0.510324	0.471867	NS	0.491095	GPI mannosyltransferase partial	0.644		0.556275	6.99173e-07	116.783	0.637843	1.87723e-09	118.783	0.336853	0.00247752	127.25	0.510324	0.517041	0.000641731	112.025	0.595829	2.57596e-05	113.912	0.302731	0.0461761	122.267	0.471867	0.42674	0.00106519	113.533	0.50483	3.10694e-05	115.291	NS	NS	NS	NS
CGI_10022240	0.616839	0.357467	NS	0.487153	hypothetical protein CGI_10022240	0.99		0.686127	3.71988e-06	229.876	0.652057	2.52535e-12	241.818	0.512333	1.13571e-08	246.81	0.616839	0.427343	0.0107886	200.552	0.389597	0.000488611	211.268	0.25546	0.0215545	216.709	0.357467	NS	NS	NS	NS	NS	NS	-0.31566	0.0133311	187.117	NS
CGI_10003999	0.483614	0.479904	NS	0.481759	tyrosine--tRNA cytoplasmic	0.9015		0.49625	0.000172791	284.114	0.438698	0.00264808	300.449	0.515895	2.82877e-07	288.675	0.483614	0.492473	0.000362729	276.149	0.431767	0.00484336	292.102	0.515473	1.74337e-06	280.828	0.479904	NS	NS	NS	NS	NS	NS	NS	NS	NS	NS
CGI_10023723	0.641386	0.316759	NS	0.479072	ATP-dependent RNA helicase	0.6622		0.758448	2.61313e-18	812.225	0.706988	6.34097e-16	856.51	0.458721	2.62631e-08	900.311	0.641386	0.435235	1.22218e-11	689.342	0.379796	1.33578e-08	728.441	0.135245	0.0323114	773.593	0.316759	0.356633	2.27874e-07	703.556	0.300756	2.71313e-05	743.591	NS	NS	NS	NS
CGI_10026022	0.464613	0.493528	NS	0.479071	trafficking particle complex subunit 2	0.917		0.363874	0.00116239	205.395	0.443395	0.000222227	208.5	0.586569	5.55286e-07	196.151	0.464613	0.394037	0.0108689	202.783	0.470118	0.00306245	205.951	0.61643	6.42654e-05	194.056	0.493528	NS	NS	NS	NS	NS	NS	0.361303	0.00169075	183.273	NS
CGI_10013758	0.525782	0.429778	NS	0.47778	meiosis expressed gene 1 homolog	0.754		0.610323	2.42848e-08	297.282	0.575681	9.29735e-07	312.08	0.391342	0.000549747	323.098	0.525782	0.515317	1.13963e-08	278.01	0.476866	2.1958e-06	291.982	0.29715	0.00179719	303.137	0.429778	0.337719	0.00133724	272.562	0.299638	0.0108744	286.414	NS	NS	NS	NS
CGI_10004715	0.378009	0.569437	NS	0.473723	ORF42 [Ostreid herpesvirus 1]	0.71		0.467078	1.21833e-10	708.923	0.497994	7.32941e-09	730.646	0.168954	0.0495519	793.313	0.378009	0.658478	5.98949e-16	748.196	0.686269	7.38461e-14	771.611	0.363563	3.17014e-05	832.068	0.569437	NS	NS	NS	NS	NS	NS	-0.470969	2.82759e-06	657.358	NS
CGI_10024255	0.495031	0.449367	NS	0.472199	Calpain [Pediculus humanus corporis]	0.6945		0.449797	0.00845221	95.6659	0.600755	5.68865e-06	95.4827	0.434541	0.00194695	98.3799	0.495031	0.403923	0.0225626	91.3332	0.552418	5.95811e-05	91.0952	0.39176	0.00705882	94.0116	0.449367	NS	NS	NS	NS	NS	NS	NS	NS	NS	NS
CGI_10016167	0.329792	0.610211	NS	0.470001	monocarboxylate transporter 12 [Orussus abietinus]	0.5865		0.267281	0.00810982	206.865	0.342738	0.000838422	210.259	0.379356	0.000242353	203.801	0.329792	0.548159	5.62682e-09	225.448	0.620412	1.49222e-10	229.719	0.662062	1.05474e-11	223.122	0.610211	-0.27791	0.0106145	175.075	NS	NS	NS	NS	NS	NS	NS
CGI_10005663	0.410569	0.528045	NS	0.469307	epidermal growth factor receptor- partial	0.685		0.622175	6.69711e-13	316.286	0.311529	0.0002106	360.711	0.298002	0.00534858	355.062	0.410569	0.737785	4.31418e-09	324.967	0.427532	0.000686606	368.92	0.418819	0.0027273	363.271	0.528045	NS	NS	NS	-0.254497	0.00234515	303.33	-0.260035	0.0147659	298.801	NS
CGI_10010125	0.422302	0.508668	NS	0.465485	pachytene checkpoint 2 homolog	0.8345		0.286165	0.0437447	109.346	0.400029	0.00822726	109.53	0.580711	1.22466e-05	102.058	0.422302	0.373315	0.00794345	110.261	0.483621	0.00138405	110.608	0.669069	5.27749e-07	103.335	0.508668	NS	NS	NS	NS	NS	NS	NS	NS	NS	NS
CGI_10011516	0.447134	0.48112	NS	0.464127	Receptor-type tyrosine- phosphatase U	0.653		0.752148	4.24511e-15	786.553	0.269479	0.0169679	941.143	0.319775	0.019073	907.833	0.447134	0.786487	5.6625e-17	777.51	0.301105	0.00625522	928.509	0.355769	0.0069147	896.289	0.48112	0.539233	9.50686e-09	735.942	NS	NS	NS	NS	NS	NS	NS
CGI_10014448	0.580703	0.331384	NS	0.456044	transcription factor ETV7-like isoform X1 [Crassostrea gigas]	0.695		0.443613	1.32395e-10	412.051	0.742508	1.99391e-27	394.583	0.555988	2.82917e-10	407.06	0.580703	0.194294	0.0104488	364.165	0.490161	1.99266e-12	345.68	0.309697	0.000828505	358.803	0.331384	NS	NS	NS	NS	NS	NS	NS	NS	NS	NS
CGI_10010087	0.422057	0.483722	NS	0.452889	Nucleolar 14	0.6695		0.46026	9.86558e-09	327.471	0.246837	0.00122389	363.563	0.559073	3.53248e-12	324.969	0.422057	0.521541	5.29473e-07	326.9	0.308166	0.0025601	362.42	0.621458	1.37209e-09	324.906	0.483722	-0.329499	0.00226908	253.097	-0.546386	5.16427e-09	286.78	-0.230338	0.0392184	248.81	-0.368741
CGI_10005127	0.349205	0.552965	NS	0.451085	FAM214A isoform X1 [Callorhinchus milii]	0.764		0.376231	4.2346e-06	748.315	0.417978	4.27315e-07	769.01	0.253406	0.0149601	793.187	0.349205	0.580528	5.52808e-12	791.955	0.619093	1.59514e-13	814.57	0.459274	3.95357e-06	837.427	0.552965	NS	NS	NS	NS	NS	NS	NS	NS	NS	NS
CGI_10010316	0.467636	0.434274	NS	0.450955	Glycerophosphodiester phosphodiesterase domain-containing 1	0.753		0.579681	0.000122208	172.046	0.385906	0.00948256	189.525	0.437322	0.00267612	183.206	0.467636	0.546833	8.65588e-05	165.023	0.349261	0.0126837	181.983	0.406728	0.00252428	175.995	0.434274	0.315081	0.0433077	158.194	NS	NS	NS	NS	NS	NS	NS
CGI_10003924	0.404979	0.485745	NS	0.445362	Neurogenic locus Notch	0.5805		0.506665	2.10606e-06	273.681	0.292771	0.0191244	303.672	0.4155	4.10608e-05	286.836	0.404979	0.587795	8.47837e-10	275.918	0.371128	0.000956559	305.523	0.498314	2.19623e-08	289.135	0.485745	NS	NS	NS	-0.266691	0.0226953	255.869	NS	NS	NS	NS
CGI_10025665	0.648795	0.241767	NS	0.445281	Leucine- glutamate- and lysine-rich 1	0.579		0.613732	1.4918e-08	275.495	0.686485	2.34881e-10	281.096	0.646167	1.39554e-08	278.381	0.648795	0.206717	0.0353382	227.605	0.277416	0.00417536	231.474	0.241168	0.0206605	229.774	0.241767	NS	NS	NS	NS	NS	NS	NS	NS	NS	NS
CGI_10010868	0.521698	0.367991	NS	0.444845	probable phytanoyl- dioxygenase	0.81		0.579465	9.03631e-09	265.561	0.533302	2.67524e-07	279.962	0.452329	6.60794e-06	281.412	0.521698	0.425985	3.84517e-05	242.903	0.376868	0.000412242	256.288	0.301119	0.00347618	258.156	0.367991	NS	NS	NS	NS	NS	NS	NS	NS	NS	NS
CGI_10024270	0.394243	0.491778	NS	0.443011	INO80 complex subunit B-like	0.7225		0.294741	0.00162036	268.423	0.579335	3.0648e-10	256.557	0.308654	0.000405171	272.447	0.394243	0.392519	9.74623e-06	271.401	0.673782	4.78925e-14	260.269	0.409035	8.96598e-07	275.748	0.491778	NS	NS	NS	0.38768	0.000141236	243.639	NS	NS	NS	NS
CGI_10022920	0.454664	0.429646	NS	0.442155	CTD nuclear envelope phosphatase 1 homolog isoform X3 [Tribolium castaneum]	0.9035		0.414914	0.000567297	194.622	0.378079	0.000425701	204.736	0.570998	1.92815e-07	189.663	0.454664	0.38986	0.00269545	187.522	0.350941	0.00300079	197.317	0.548137	3.24743e-06	182.807	0.429646	NS	NS	NS	NS	NS	NS	0.340202	0.00173322	176.827	NS
CGI_10027754	0.482583	0.38674	NS	0.434662	hypothetical protein CGI_10027754	0.722		0.399572	0.0129383	232.86	0.624696	6.52849e-05	226.715	0.42348	0.00402336	235.855	0.482583	0.304288	0.0139779	217.793	0.52644	1.79911e-05	211.494	0.329493	0.00217269	220.721	0.38674	NS	NS	NS	0.287656	0.0213755	202.289	NS	NS	NS	NS
CGI_10026712	0.363918	0.491582	NS	0.42775	D-beta-hydroxybutyrate mitochondrial-like [Crassostrea gigas]	0.565		0.375648	0.000713061	224.145	0.422743	0.00777608	229.419	0.293363	0.00142598	234.818	0.363918	0.503816	0.000228636	230.448	0.546618	0.00158957	236.072	0.424311	0.000343262	241.221	0.491582	-0.371847	0.00183805	176.492	NS	NS	NS	-0.455475	1.15131e-06	186.306	NS
CGI_10005106	0.400506	0.442995	NS	0.421751	Fas ligand	0.6756		0.673481	4.08122e-10	953.742	0.315128	0.00781217	1101.85	0.21291	0.0494102	1116.32	0.400506	0.716617	5.31807e-13	945.992	0.354691	0.000985629	1090.8	0.257676	0.00588812	1105.25	0.442995	0.619224	2.6549e-11	954.22	0.256352	0.0129653	1104.7	NS	NS	NS	NS
CGI_10018891	0.444508	0.392477	NS	0.418493	TPR repeat-containing DDB_G0287407-like	0.607		0.43842	6.89464e-06	228.182	0.578959	7.66244e-10	228.096	0.316147	0.00142557	241.931	0.444508	0.38662	0.000143594	217.475	0.524003	6.89557e-08	217.208	0.266807	0.0100632	230.92	0.392477	-0.370392	0.000892868	175.317	-0.234486	0.043576	172.839	-0.491892	2.99672e-06	188.18	-0.36559
CGI_10019460	0.381675	0.444967	NS	0.413321	battenin-like isoform X1 [Biomphalaria glabrata]	0.6615		0.341117	8.72147e-05	544.792	0.532838	9.71475e-12	535.873	0.27107	0.000218564	568.414	0.381675	0.404669	8.92543e-06	544.062	0.593035	6.43953e-13	535.914	0.337197	1.20077e-05	567.709	0.444967	NS	NS	NS	0.373444	5.59728e-05	515.86	NS	NS	NS	NS
CGI_10018532	0.398435	0.409759	NS	0.404097	Neurochondrin	0.5625		0.430911	0.00798404	77.2799	0.328759	0.0268081	83.0592	0.435635	0.00564464	78.8827	0.398435	0.442273	0.00387132	75.5093	0.337481	0.0180579	81.1599	0.449522	0.00234675	77.1359	0.409759	NS	NS	NS	NS	NS	NS	NS	NS	NS	NS
CGI_10005208	0.348123	0.456032	NS	0.402078	Dynactin subunit 3	0.6775		0.452621	1.57259e-10	588.185	0.208639	0.0100916	659.764	0.383108	5.83875e-06	612.507	0.348123	0.559675	2.00085e-07	599.237	0.315244	0.00724668	670.071	0.493177	2.49493e-05	624.013	0.456032	0.185926	0.00461524	543.428	NS	NS	NS	NS	NS	NS	NS
CGI_10025764	0.443654	0.355895	NS	0.399774	sodium-coupled neutral amino acid transporter 10	0.695		0.331566	0.000257249	701.582	0.410947	5.02566e-05	712.536	0.588448	2.90724e-07	663.423	0.443654	0.243714	0.00182887	660.14	0.320577	0.000472159	669.93	0.503395	1.74337e-06	622.9	0.355895	NS	NS	NS	NS	NS	NS	NS	NS	NS	NS
CGI_10015190	0.463684	0.315916	NS	0.3898	ATP-binding cassette sub-family B member mitochondrial	0.8035		0.359949	0.0150187	363.353	0.450713	0.0037102	367.512	0.580391	1.04123e-05	347.39	0.463684	0.211836	0.0378562	333.241	0.299335	0.0130496	336.578	0.436577	1.32904e-07	317.583	0.315916	NS	NS	NS	NS	NS	NS	0.337808	0.000106153	321.541	NS
CGI_10024676	0.302539	0.456152	NS	0.379346	coiled-coil domain-containing 60-like isoform X2	0.71		0.324688	0.00611765	298.594	0.218433	0.0442976	321.392	0.364496	0.00456718	300.587	0.302539	0.478309	7.61844e-05	309.501	0.370002	0.000932945	332.525	0.520146	5.89664e-05	312.076	0.456152	NS	NS	NS	NS	NS	NS	NS	NS	NS	NS
CGI_10010631	0.366906	0.385716	NS	0.376311	signal recognition particle 9 kDa -like	0.858		0.471128	4.42492e-05	217.39	0.248189	0.0261692	242.141	0.381401	0.00346993	227.727	0.366906	0.490203	8.76685e-06	213.185	0.264529	0.0135261	237.377	0.402417	0.00131837	223.465	0.385716	NS	NS	NS	NS	NS	NS	NS	NS	NS	NS
CGI_10024395	0.452521	0.293353	NS	0.372937	substance-K receptor-like [Crassostrea gigas]	0.58		0.433378	2.06568e-06	708.602	0.439602	2.46842e-05	735.803	0.484582	8.74255e-11	712.53	0.452521	0.274568	0.00146739	647.972	0.277971	0.00662678	672.803	0.327519	4.0341e-07	651.396	0.293353	NS	NS	NS	NS	NS	NS	0.203139	0.00125266	653.832	NS
CGI_10006924	0.388451	0.350454	NS	0.369453	nuclear pore complex Nup107-like	0.7055		0.310938	0.00150554	1175.27	0.308662	0.00184473	1223.9	0.545753	3.04241e-08	1118.28	0.388451	0.273138	0.00145999	1126.71	0.267986	0.00234898	1173.5	0.510239	3.4055e-09	1071.58	0.350454	-0.25483	6.07908e-05	986.502	-0.260747	6.71374e-05	1027.45	NS	NS	NS	NS
CGI_10014181	0.400882	0.329551	NS	0.365217	tubulin-specific chaperone cofactor E isoform X1 [Macaca nemestrina]	0.619		0.369272	2.6702e-06	325.467	0.341347	1.49339e-05	341.32	0.492028	6.91214e-11	320.175	0.400882	0.298002	0.000623544	308.206	0.267609	0.002378	323.34	0.42304	1.90975e-07	303.094	0.329551	NS	NS	NS	NS	NS	NS	0.293989	0.00035069	303.249	NS
CGI_10012225	0.436241	0.293749	NS	0.364995	hypothetical protein CGI_10012225	0.5725		0.473753	8.68763e-11	1202.42	0.449281	2.2464e-12	1260.42	0.385687	2.80917e-07	1259.31	0.436241	0.331329	8.56492e-06	1105.91	0.304077	2.86805e-06	1159.9	0.245841	0.00171875	1160.85	0.293749	NS	NS	NS	NS	NS	NS	NS	NS	NS	NS
CGI_10002179	0.385433	0.342868	NS	0.36415	cell cycle regulator Mat89Bb like	0.7075		0.354779	0.00253035	127.565	0.428788	0.000141975	129.876	0.372732	0.00203719	129.592	0.385433	0.312303	0.0066444	122.094	0.38344	0.000476322	124.257	0.332862	0.00403372	124.095	0.342868	NS	NS	NS	NS	NS	NS	NS	NS	NS	NS
CGI_10006996	0.329985	0.394813	NS	0.362399	DNA polymerase delta subunit 3	0.629		0.422009	1.15937e-05	518.173	0.28717	0.0015223	562.08	0.280777	0.0033715	552.169	0.329985	0.487201	6.87896e-10	517.895	0.349245	6.88689e-07	561.224	0.347993	3.84477e-06	551.657	0.394813	NS	NS	NS	-0.184089	0.0273119	487.786	-0.184997	0.0365614	479.341	NS
CGI_10021808	0.429601	0.278139	NS	0.35387	exportin-2-like [Aplysia californica]	0.804		0.506497	1.46224e-14	770.627	0.347861	7.56256e-07	840.197	0.434446	8.48579e-12	803.213	0.429601	0.355069	2.76733e-07	705.521	0.193667	0.0130188	771.574	0.285679	1.9657e-05	736.846	0.278139	NS	NS	NS	NS	NS	NS	NS	NS	NS	NS
CGI_10026129	0.417324	0.264277	NS	0.340801	alternative splicing factor SRp20 [Ixodes scapularis]	0.8225		0.450217	1.0082e-08	1143.42	0.428792	1.0324e-08	1197.7	0.372963	0.000180922	1193.71	0.417324	0.29741	1.23851e-07	1047.56	0.272855	2.35849e-08	1097.74	0.222567	0.0102582	1095.88	0.264277	NS	NS	NS	NS	NS	NS	NS	NS	NS	NS
CGI_10018193	0.341346	0.339721	NS	0.340534	Tetratricopeptide repeat 19	0.592		0.31021	0.00122024	232.433	0.4081	0.000240393	234.342	0.305728	0.00456327	237.328	0.341346	0.308609	0.00986436	226.248	0.403615	0.00221125	228.14	0.30694	0.0181767	231.217	0.339721	NS	NS	NS	NS	NS	NS	NS	NS	NS	NS
CGI_10004679	0.33687	0.341842	NS	0.339356	polypeptide N-acetylgalactosaminyltransferase 2-like	0.6		0.431312	4.83211e-05	310.179	0.246033	0.00926653	341.798	0.333266	0.000388222	326.301	0.33687	0.435675	0.000137205	302.415	0.249005	0.0182921	333.265	0.340844	0.000909883	318.357	0.341842	NS	NS	NS	NS	NS	NS	NS	NS	NS	NS
CGI_10007830	0.364643	0.304491	NS	0.334567	UNC5C [Bos taurus]	0.504		0.286725	0.0301022	742.431	0.375964	0.00116946	751.446	0.431239	0.000851455	724.385	0.364643	0.226313	0.00763747	705.121	0.313069	8.80125e-07	713.324	0.37409	2.52687e-05	687.831	0.304491	NS	NS	NS	0.207881	0.0242031	722.526	0.270123	0.0142622	695.901	NS
CGI_10006979	0.297435	0.351546	NS	0.324491	nucleolar and coiled-body phospho 1-like isoform X3	0.8635		0.294464	0.00160741	748.298	0.316074	0.00305589	773.162	0.281768	0.0153599	766.662	0.297435	0.349243	4.17712e-05	743.71	0.367355	0.00024016	768.617	0.33804	0.00167514	762.394	0.351546	NS	NS	NS	NS	NS	NS	NS	NS	NS	NS
CGI_10002241	0.341287	0.30737	NS	0.324328	EF-hand calcium-binding domain-containing 11-like	0.607		0.256378	0.00253136	1073.8	0.388927	1.15501e-08	1072.15	0.378555	1.10556e-08	1054.42	0.341287	0.222552	0.046548	1032.63	0.352107	0.000188966	1030.63	0.347452	0.000205708	1014.37	0.30737	NS	NS	NS	0.200063	0.0297454	1023.28	0.195114	0.0303862	1006.79	NS
CGI_10011869	0.371683	0.270089	NS	0.320886	nucleoporin seh1 isoform X2	0.8395		0.394201	4.28587e-09	401.097	0.321697	0.000450225	426.391	0.399149	2.38705e-06	408.418	0.371683	0.292391	0.000457097	375.343	0.217744	0.0494443	399.412	0.300132	0.00269954	382.443	0.270089	0.215765	0.00718721	384.115	NS	NS	NS	0.223656	0.0227282	391.079	NS
CGI_10009262	0.264356	0.37412	NS	0.319238	hypothetical protein CGI_10009262	0.572		0.32977	2.04121e-08	2273.01	0.243146	0.00119374	2429.48	0.220151	0.00684319	2399.59	0.264356	0.438747	3.92406e-05	2314.04	0.350506	0.00257991	2470.66	0.333107	0.00551125	2441.31	0.37412	NS	NS	NS	NS	NS	NS	NS	NS	NS	NS
CGI_10026789	0.288924	0.341129	NS	0.315026	28S ribosomal mitochondrial	0.656		0.271252	0.000852014	282.928	0.337132	7.94089e-06	288.187	0.258389	0.0013818	289.538	0.288924	0.322631	0.00891119	281.569	0.386532	0.000783753	286.944	0.314223	0.00908747	288.329	0.341129	-0.203771	0.0434685	244.97	NS	NS	NS	-0.214335	0.0271972	250.796	NS
CGI_10023580	0.338919	0.287283	NS	0.313101	Ferric-chelate reductase 1	0.598		0.433938	9.7734e-08	817.595	0.273223	0.00129295	893.73	0.309596	0.00152899	866.206	0.338919	0.382805	1.34443e-08	779.546	0.218707	0.00191414	853.031	0.260336	0.00271605	827.108	0.287283	0.263958	0.000661701	783.749	NS	NS	NS	NS	NS	NS	NS
CGI_10009088	0.338025	0.285308	NS	0.311666	ammonium transporter 1	0.6805		0.321357	0.0216515	1046.59	0.372034	0.00189788	1072.98	0.320684	0.0036863	1068.95	0.338025	0.269142	0.0442497	998.09	0.316664	0.00398627	1022.92	0.270117	0.00591287	1020.03	0.285308	-0.248005	0.0335237	875.259	-0.203458	0.0288745	894.133	-0.252274	0.000524264	893.981	-0.234579
CGI_10010434	0.25895	0.363114	NS	0.311032	PREDICTED: uncharacterized protein LOC105331603 [Crassostrea gigas]	1		0.257245	0.0453042	3281.67	0.250409	0.0418172	3422.07	0.269195	0.0116905	3336.27	0.25895	0.361243	0.00151927	3326.44	0.351764	0.00131867	3469.01	0.376334	4.92705e-05	3385.22	0.363114	NS	NS	NS	NS	NS	NS	NS	NS	NS	NS
CGI_10004678	0.299319	0.321438	NS	0.310378	[Nematostella vectensis]	0.721		0.344428	0.0002623	213.019	0.250061	0.023757	228.242	0.303467	0.00207154	220.309	0.299319	0.366793	6.39903e-05	209.034	0.269163	0.0134376	223.965	0.328357	0.000558895	216.328	0.321438	NS	NS	NS	NS	NS	NS	NS	NS	NS	NS
CGI_10011037	0.326507	0.270314	NS	0.298411	GPI inositol-deacylase	0.649		0.386644	0.00129973	762.92	0.320371	2.28278e-05	810.919	0.272508	0.000207397	807.303	0.326507	0.330886	0.00900863	726.613	0.261406	0.00153406	772.726	0.218651	0.00602804	769.923	0.270314	NS	NS	NS	NS	NS	NS	NS	NS	NS	NS
CGI_10019873	0.288222	0.304166	NS	0.296194	RNA RNP complex-1-interacting phosphatase	0.678		0.29611	0.00174175	275.067	0.31423	0.00184055	284.575	0.254326	0.0131429	284.604	0.288222	0.311863	0.000101067	269.39	0.32728	0.000162877	278.748	0.273356	0.00160682	278.898	0.304166	NS	NS	NS	NS	NS	NS	NS	NS	NS	NS
CGI_10018769	0.23712	0.346155	NS	0.291637	TBC1 domain family member 10B	0.796		0.201571	0.00566495	388.764	0.313813	2.61635e-05	390.349	0.195975	0.0188401	397.182	0.23712	0.310982	2.88195e-05	394.32	0.420034	4.55991e-08	396.523	0.307448	0.000182387	403.091	0.346155	NS	NS	NS	0.206621	0.0337285	384.472	NS	NS	NS	NS
CGI_10004370	0.311762	0.268428	NS	0.290095	PREDICTED: uncharacterized protein C7orf62-like isoform X2 [Crassostrea gigas]	0.759		0.350209	1.71583e-05	278.901	0.241897	0.00273875	300.386	0.34318	0.0019261	284.988	0.311762	0.306491	0.00082877	267.347	0.195348	0.0363447	288.134	0.303445	0.0108709	273.371	0.268428	NS	NS	NS	NS	NS	NS	NS	NS	NS	NS
CGI_10007439	0.23291	0.337881	NS	0.285396	peptidyl-prolyl cis-trans isomerase G-like	0.985		0.239908	0.00632503	528.16	0.240721	0.0124054	548.953	0.218101	0.028809	542.508	0.23291	0.344796	0.000922107	535.477	0.343306	0.00209697	556.726	0.325543	0.00376588	550.317	0.337881	NS	NS	NS	NS	NS	NS	NS	NS	NS	NS
CGI_10014381	0.358793	0.207194	NS	0.282994	binding zinc ion binding [Galdieria sulphuraria]	0.672		0.444705	1.78551e-05	1270.98	0.333324	0.00293895	1367.83	0.29835	0.00472794	1356.56	0.358793	0.293884	9.1051e-05	1164.81	0.178777	0.0488452	1256.34	0.148922	0.0499207	1247.29	0.207194	NS	NS	NS	NS	NS	NS	-0.142951	0.0217538	1185.62	NS
CGI_10009943	0.381924	0.161011	NS	0.271467	von Willebrand factor A domain-containing 5A [Myotis brandtii]	0.6535		0.354203	7.46517e-15	1212.44	0.375234	4.00532e-11	1253.14	0.416335	3.15128e-20	1214.16	0.381924	0.133185	0.0406979	1086.32	0.152098	0.0441552	1122.3	0.19775	0.00104422	1086.79	0.161011	NS	NS	NS	NS	NS	NS	NS	NS	NS	NS
CGI_10010236	0.243586	0.286282	NS	0.264934	heparan sulfate glucosamine 3-O-sulfotransferase 3B1-like	0.765		0.207377	0.0150224	600.181	0.318146	0.0003829	603.048	0.205235	0.0117992	612.779	0.243586	0.250132	0.000479002	593.507	0.358187	3.93736e-06	596.675	0.250528	0.000198398	606.385	0.286282	NS	NS	NS	NS	NS	NS	NS	NS	NS	NS
CGI_10015009	0.20633	0.298073	NS	0.252201	histone acetyltransferase KAT8	0.891		0.289382	4.64815e-05	378.992	0.165129	0.0394478	410.02	0.164479	0.0258541	402.452	0.20633	0.380922	3.42696e-07	382.314	0.254348	0.00193329	413.123	0.25895	0.000607268	405.74	0.298073	0.21165	0.0109593	377.158	NS	NS	NS	NS	NS	NS	NS
CGI_10028689	0.234912	0.262709	NS	0.248811	cyclin-G-associated kinase isoform X2	0.649		0.172131	0.0179187	1321.83	0.330824	3.65921e-05	1307.27	0.201782	0.0195667	1335.42	0.234912	0.200152	0.00456579	1300.01	0.355897	7.9533e-06	1286.61	0.232079	0.00565023	1314.45	0.262709	NS	NS	NS	NS	NS	NS	NS	NS	NS	NS
CGI_10009374	0.244378	0.245882	NS	0.24513	FAS-associated factor 1	0.5665		0.262502	1.0888e-05	1240.02	0.170063	0.00440782	1329.24	0.300569	1.24012e-06	1249.98	0.244378	0.264224	6.51657e-08	1207.67	0.169005	0.000392506	1294.72	0.304418	2.08099e-09	1218.19	0.245882	NS	NS	NS	NS	NS	NS	0.156698	0.00980046	1213.12	NS
CGI_10013494	0.249662	0.229711	NS	0.239687	ras and EF-hand domain-containing -like	0.78		0.214659	4.4297e-05	1557.62	0.280973	4.40791e-05	1586.9	0.253353	0.00266849	1569.2	0.249662	0.194956	0.0320456	1505.86	0.258114	0.00891453	1534.09	0.236065	0.0305189	1517.81	0.229711	0.116691	0.0204909	1539.59	0.179416	0.00869227	1567.04	NS	NS	NS	NS
CGI_10009014	0.223179	0.255818	NS	0.239498	Phosphatidylinositol 4-kinase type 2-beta	0.7465		0.230767	0.000958461	893.618	0.216358	0.000392345	934.142	0.222411	0.000259569	914.321	0.223179	0.263214	0.000176793	880.44	0.246459	7.07425e-05	920.462	0.257781	2.48887e-05	901.454	0.255818	NS	NS	NS	NS	NS	NS	NS	NS	NS	NS
CGI_10010048	0.222615	0.208985	NS	0.2158	Thioredoxin domain-containing 11	0.606		0.232617	0.000771675	440.646	0.248645	0.000842243	456.135	0.186583	0.00949577	456.364	0.222615	0.219056	0.00323866	426.606	0.232228	0.00384957	441.675	0.175672	0.0221493	442.169	0.208985	NS	NS	NS	NS	NS	NS	NS	NS	NS	NS
CGI_10002220	0.201152	0.196618	NS	0.198885	[Nematostella vectensis]	0.6263		0.234493	0.0020491	1295.36	0.182534	0.032254	1370.29	0.186429	0.0197409	1341.93	0.201152	0.229945	0.0026485	1259.03	0.175359	0.044805	1332.12	0.184548	0.0219906	1305.28	0.196618	NS	NS	NS	NS	NS	NS	NS	NS	NS	NS
CGI_10014093	-0.166822	-0.225715	NS	-0.196269	max dimerization 1-like	0.771		-0.159837	0.000643239	1444.02	-0.173389	0.00574425	1509.86	-0.167239	0.043508	1477.16	-0.166822	-0.219433	1.82613e-06	1379.38	-0.23482	0.000122961	1442.78	-0.222893	0.00510431	1411.83	-0.225715	NS	NS	NS	NS	NS	NS	NS	NS	NS	NS
CGI_10021619	-0.231745	-0.193167	NS	-0.212456	semaphorin-1A-like isoform X1 [Lingula anatina]	0.7525		-0.252831	3.10674e-13	3217.23	-0.241062	0.00165858	3334.51	-0.201343	1.65238e-08	3220.52	-0.231745	-0.214146	5.33743e-06	3170.53	-0.204979	0.016455	3287.1	-0.160376	0.000812284	3176.25	-0.193167	-0.132889	0.00265953	3427.18	NS	NS	NS	NS	NS	NS	NS
CGI_10023922	-0.210789	-0.243062	NS	-0.226925	pleckstrin homology domain-containing family A member 2-like	0.712		-0.274505	3.66494e-07	2097.36	-0.125123	0.0153212	2064.62	-0.232738	5.02236e-05	2106.62	-0.210789	-0.306652	1.97649e-06	2020.87	-0.160212	0.0125059	1988.67	-0.262322	8.58468e-05	2030.51	-0.243062	NS	NS	NS	0.190964	0.00838152	2367.92	NS	NS	NS	NS
CGI_10025955	-0.272454	-0.195896	NS	-0.234175	Lamin-B receptor	0.7215		-0.252183	0.000337836	1353.63	-0.278376	3.53491e-06	1422.18	-0.286803	4.54455e-05	1399.05	-0.272454	-0.175906	0.0461741	1350.38	-0.204423	0.00862861	1418.85	-0.20736	0.0174499	1396.18	-0.195896	NS	NS	NS	NS	NS	NS	NS	NS	NS	NS
CGI_10019578	-0.223298	-0.297214	NS	-0.260256	ral GTPase-activating subunit alpha-1-like isoform X4 [Biomphalaria glabrata]	0.7555		-0.313735	1.99307e-16	2053.96	-0.125261	0.00516406	1992.04	-0.2309	9.28701e-07	2030.72	-0.223298	-0.387409	4.70665e-10	1954.38	-0.202234	0.00333229	1892.82	-0.301999	1.03546e-05	1931.89	-0.297214	NS	NS	NS	NS	NS	NS	NS	NS	NS	NS
CGI_10003651	-0.290204	-0.233116	NS	-0.26166	FAM172A isoform X1	0.6755		-0.25428	1.4251e-05	821.519	-0.30047	1.16228e-05	870.342	-0.315862	4.94566e-08	858.278	-0.290204	-0.197212	0.0290401	814.599	-0.245911	0.00936739	862.933	-0.256224	0.00254333	851.075	-0.233116	0.169179	0.000403486	973.462	NS	NS	NS	0.109394	0.0295161	1013.8	NS
CGI_10009708	-0.243103	-0.28351	NS	-0.263307	Tetratricopeptide repeat 38	0.6805		-0.223242	0.00424443	698.778	-0.228154	0.00307805	728.784	-0.277914	9.88794e-05	727.989	-0.243103	-0.263604	0.00101336	671.635	-0.271293	0.00048249	700.628	-0.315633	1.8526e-05	700.272	-0.28351	0.484311	1.60194e-09	927.059	0.476051	1.54126e-09	966.026	0.432076	1.78534e-08	961.338	0.464146
CGI_10016339	-0.228406	-0.309643	NS	-0.269024	myosin heavy striated muscle-like	0.5615		-0.246763	0.000805618	1281.24	-0.178942	0.0374267	1300.13	-0.259513	0.00162572	1313.98	-0.228406	-0.328054	4.22039e-05	1215.7	-0.262831	0.00347368	1233.12	-0.338043	0.000100785	1247.53	-0.309643	NS	NS	NS	NS	NS	NS	NS	NS	NS	NS
CGI_10002951	-0.259361	-0.283052	NS	-0.271206	CAP-Gly domain-containing linker 1-like isoform X4	0.63		-0.217249	0.0118958	295.418	-0.228416	0.0142584	308.77	-0.332417	0.00155096	315.16	-0.259361	-0.240967	0.0412547	284.792	-0.254992	0.0391905	297.768	-0.353196	0.00668173	304.14	-0.283052	NS	NS	NS	NS	NS	NS	NS	NS	NS	NS
CGI_10007637	-0.328439	-0.220379	NS	-0.274409	[Nematostella vectensis]	0.741		-0.352096	2.29288e-05	1228.08	-0.255708	0.000585147	1231.05	-0.377514	6.80095e-08	1265.64	-0.328439	-0.24451	0.00102001	1236.37	-0.150003	0.0200301	1241.23	-0.266624	2.4563e-06	1274.41	-0.220379	NS	NS	NS	0.204209	0.00252134	1480.24	NS	NS	NS	NS
CGI_10024363	-0.301517	-0.26166	NS	-0.281588	Carboxypeptidase Q	0.81		-0.342695	1.86183e-09	590.782	-0.19957	0.000579926	581.883	-0.362285	1.31505e-07	607.571	-0.301517	-0.303009	3.97792e-06	582.559	-0.162601	0.0185742	574.356	-0.319371	2.62694e-05	599.355	-0.26166	NS	NS	NS	0.148881	0.0311991	673.605	NS	NS	NS	NS
CGI_10011932	-0.250088	-0.33914	NS	-0.294614	Calcitonin receptor	0.6905		-0.245906	0.0219464	659.209	-0.228399	0.0399347	681.384	-0.27596	0.00381364	680.169	-0.250088	-0.335179	0.00012244	624.131	-0.319698	0.000521065	645.222	-0.362543	2.08402e-06	644.579	-0.33914	NS	NS	NS	NS	NS	NS	NS	NS	NS	NS
CGI_10014936	-0.262513	-0.342266	NS	-0.30239	lysosome-associated membrane glyco 1-like	0.8133		-0.286712	0.000981899	1195.74	-0.333589	2.09356e-05	1266.75	-0.167239	0.040352	1166.08	-0.262513	-0.366197	0.000107854	1135.3	-0.415804	1.36454e-06	1203.59	-0.244799	0.00530365	1106.36	-0.342266	NS	NS	NS	-0.232863	0.0172251	1340.91	NS	NS	NS	NS
CGI_10026556	-0.25578	-0.37754	NS	-0.31666	Tetratricopeptide repeat 17	0.6735		-0.289164	1.02417e-07	1023.93	-0.218374	0.00250576	1037.71	-0.259801	0.0021363	1033.64	-0.25578	-0.411065	3.72864e-07	960.056	-0.34302	0.00021368	972.26	-0.378537	0.000178859	969.19	-0.37754	NS	NS	NS	NS	NS	NS	NS	NS	NS	NS
CGI_10008678	-0.29292	-0.39066	NS	-0.34179	Receptor-type tyrosine- phosphatase T	0.685		-0.342656	0.00759448	337.887	-0.278679	0.0335273	342.839	-0.257425	0.0470748	333.555	-0.29292	-0.440466	4.32409e-06	319.432	-0.379223	8.64072e-05	323.937	-0.352292	0.000127884	315.14	-0.39066	0.446505	4.94056e-08	458.89	0.507365	2.3708e-10	468.333	0.535503	5.50048e-13	456.714	0.496458
CGI_10012494	-0.231967	-0.451648	NS	-0.341807	PREDICTED: uncharacterized protein LOC105334747 [Crassostrea gigas]	0.5709		-0.239619	0.00781888	434.506	-0.257484	0.00010411	454.863	-0.198798	0.00724591	436.18	-0.231967	-0.458926	2.56432e-08	395.371	-0.47997	2.78284e-14	414.245	-0.416048	7.01117e-10	396.647	-0.451648	NS	NS	NS	NS	NS	NS	NS	NS	NS	NS
CGI_10006025	-0.308093	-0.375769	NS	-0.341931	CREB-binding -like isoform X2	0.7405		-0.47141	1.76941e-12	999.759	-0.245185	0.000591268	952.105	-0.207684	0.00903343	920.62	-0.308093	-0.538822	1.59237e-15	954.328	-0.315544	6.41679e-06	907.388	-0.27294	0.000356874	877.273	-0.375769	NS	NS	NS	NS	NS	NS	0.206377	0.0249469	1089.4	NS
CGI_10002650	-0.351968	-0.339488	NS	-0.345728	PACRG isoform X1	0.8075		-0.381723	2.16532e-05	212.31	-0.360939	6.69488e-05	219.143	-0.31324	0.00189329	210.979	-0.351968	-0.369213	0.000620836	207.479	-0.351104	0.00115424	214.226	-0.298146	0.011766	206.298	-0.339488	NS	NS	NS	NS	NS	NS	NS	NS	NS	NS
CGI_10025143	-0.454832	-0.269465	NS	-0.362149	Signal peptide peptidase-like 2B	0.684		-0.369151	1.44899e-07	426.602	-0.536196	9.28133e-13	475.087	-0.45915	1.12795e-06	451.84	-0.454832	-0.183663	0.0112035	440.277	-0.353266	1.22524e-06	488.61	-0.271467	0.00448157	465.588	-0.269465	NS	NS	NS	-0.247667	0.000472091	531.778	NS	NS	NS	NS
CGI_10021671	-0.429296	-0.297177	NS	-0.363236	hypothetical protein CGI_10021671	0.7395		-0.403321	4.51869e-13	740.251	-0.441244	4.79452e-11	782.083	-0.443323	1.3487e-15	767.501	-0.429296	-0.271363	4.78716e-05	750.631	-0.311436	5.03131e-05	792.814	-0.308731	1.98934e-06	778.159	-0.297177	0.205938	0.00070746	931.386	0.164156	0.0296946	981.109	0.167807	0.00669705	962.854	0.1793
CGI_10019507	-0.337977	-0.412789	NS	-0.375383	von Willebrand factor type EGF and pentraxin domain-containing 1	0.5425		-0.218403	0.00022765	2106.93	-0.487321	3.23967e-16	2435.16	-0.308208	0.00121292	2226.43	-0.337977	-0.293513	0.000122226	2001.87	-0.564388	2.3476e-14	2320.17	-0.380468	0.000218204	2117.99	-0.412789	NS	NS	NS	-0.43301	5.12156e-08	2537.14	-0.250097	0.0245254	2321.98	NS
CGI_10002351	-0.338965	-0.414246	NS	-0.376605	nucleoporin p58 p45-like isoform X1	0.753		-0.36239	1.37507e-09	853.551	-0.216197	0.00038998	839.772	-0.438309	1.65238e-13	897.643	-0.338965	-0.437657	1.66839e-14	811.908	-0.294098	1.86156e-07	797.942	-0.510981	8.85818e-20	854.819	-0.414246	NS	NS	NS	NS	NS	NS	NS	NS	NS	NS
CGI_10014109	-0.297731	-0.467143	NS	-0.382437	probable cation-transporting ATPase 13A3	0.7715		-0.364485	4.11206e-05	1231.14	-0.184034	0.0257629	1195.49	-0.344673	3.62424e-06	1246.36	-0.297731	-0.533572	6.29389e-12	1140.62	-0.356179	5.50047e-08	1103.9	-0.511679	6.11448e-17	1154.77	-0.467143	NS	NS	NS	0.211674	0.0135982	1409.56	NS	NS	NS	NS
CGI_10007208	-0.414903	-0.354276	NS	-0.38459	bifunctional heparan sulfate N-deacetylase N-sulfotransferase-like	0.74		-0.397805	9.54033e-07	426.879	-0.432722	1.25099e-06	450.382	-0.414183	1.5509e-10	437.9	-0.414903	-0.337653	0.000362729	422.953	-0.374811	0.00023478	446.311	-0.350364	6.17543e-06	434.06	-0.354276	NS	NS	NS	NS	NS	NS	NS	NS	NS	NS
CGI_10015205	-0.322238	-0.44703	NS	-0.384634	Mediator of RNA polymerase II transcription subunit 15	0.7565		-0.253316	0.001369	816.377	-0.19961	0.0141603	832.667	-0.513788	1.85515e-09	923.819	-0.322238	-0.378187	6.08394e-07	764.406	-0.3274	1.29104e-05	779.182	-0.635505	3.01909e-14	868.736	-0.44703	NS	NS	NS	NS	NS	NS	-0.246679	0.0165002	1025.66	NS
CGI_10022318	-0.358731	-0.422701	NS	-0.390716	cyclic nucleotide-binding domain-containing 2-like	0.6335		-0.356727	0.00471536	253.792	-0.330918	0.0166129	261.435	-0.388548	0.000103935	261.974	-0.358731	-0.420715	0.000316788	242.277	-0.397101	0.0020508	249.592	-0.450289	7.02478e-07	250.253	-0.422701	NS	NS	NS	NS	NS	NS	NS	NS	NS	NS
CGI_10013622	-0.418615	-0.364131	NS	-0.391373	integrator complex subunit 5	0.574		-0.394267	1.23546e-07	974.928	-0.290282	5.5535e-05	974.192	-0.571296	9.51054e-14	1069.33	-0.418615	-0.339727	6.08548e-09	965.202	-0.238132	6.56943e-06	965.336	-0.514532	3.38819e-17	1057.84	-0.364131	NS	NS	NS	NS	NS	NS	-0.267404	0.00429323	1198.61	NS
CGI_10004181	-0.4472	-0.344534	NS	-0.395867	probable pyruvate dehydrogenase E1 component subunit mitochondrial	0.823		-0.451387	1.02333e-05	738.373	-0.391717	0.000142571	749.614	-0.498496	4.17396e-06	767.742	-0.4472	-0.348898	4.79086e-05	741.444	-0.291468	0.00100416	753.605	-0.393235	3.56494e-05	770.96	-0.344534	0.294871	7.78091e-06	975.175	0.3509	1.26989e-07	995.384	0.247258	0.00242106	1009.84	0.297676
CGI_10011666	-0.247216	-0.554205	NS	-0.40071	Polyphosphoinositide phosphatase	0.6525		-0.248345	0.000152675	561.817	-0.137023	0.0436582	560.922	-0.356281	7.68558e-08	597.593	-0.247216	-0.555379	1.87395e-11	498.34	-0.44723	4.84865e-08	495.691	-0.660005	2.37491e-15	532.416	-0.554205	NS	NS	NS	NS	NS	NS	-0.233629	0.000756235	636.121	NS
CGI_10026956	-0.355143	-0.448932	NS	-0.402038	tRNA selenocysteine 1-associated 1-like	0.7855		-0.489358	6.7982e-13	870.417	-0.318543	5.08263e-06	846.169	-0.257528	0.000757029	810.567	-0.355143	-0.583262	2.94798e-19	824.774	-0.414933	2.87161e-10	800.534	-0.348601	1.26031e-06	766.467	-0.448932	-0.18686	0.00082249	979.695	NS	NS	NS	NS	NS	NS	NS
CGI_10026676	-0.37378	-0.433625	NS	-0.403702	Methionine aminopeptidase mitochondrial	0.738		-0.488834	3.58653e-06	172.893	-0.338052	0.00561994	169.466	-0.294454	0.00906821	163.419	-0.37378	-0.549136	1.54676e-07	165.57	-0.399777	0.000829408	162.17	-0.351961	0.00135323	156.364	-0.433625	NS	NS	NS	NS	NS	NS	NS	NS	NS	NS
CGI_10006187	-0.342376	-0.468749	NS	-0.405563	alkylglycerol monooxygenase	0.726		-0.403833	4.22991e-06	692.767	-0.298746	0.00388336	691.781	-0.324551	0.000364869	684.945	-0.342376	-0.530447	5.70762e-14	649.773	-0.42754	7.54227e-07	648.036	-0.448259	1.10192e-09	642.002	-0.468749	NS	NS	NS	NS	NS	NS	NS	NS	NS	NS
CGI_10001020	-0.468338	-0.363803	NS	-0.416071	hypothetical protein CGI_10001020	0.8433		-0.435406	0.00251405	74.6155	-0.458013	0.00105585	78.554	-0.511596	0.00115608	78.6814	-0.468338	-0.331233	0.0362387	75.0012	-0.356256	0.0196655	78.9507	-0.403919	0.0164186	79.0423	-0.363803	0.423136	0.00444646	103.61	0.397938	0.00611078	108.706	0.3454	0.0378233	108.33	0.388825
CGI_10017893	-0.452956	-0.380469	NS	-0.416713	PREDICTED: uncharacterized protein LOC105326098 [Crassostrea gigas]	0.6532		-0.406198	1.80298e-06	246.71	-0.357865	1.2133e-05	251.724	-0.594806	2.70994e-09	271.924	-0.452956	-0.334075	0.000453445	245.406	-0.288153	0.00173889	250.568	-0.519179	1.34927e-06	270.192	-0.380469	NS	NS	NS	NS	NS	NS	NS	NS	NS	NS
CGI_10021791	-0.411411	-0.436942	NS	-0.424177	F-box LRR-repeat 21-like [Crassostrea gigas]	0.5611		-0.288154	0.0313409	198.178	-0.541238	1.93809e-06	228.218	-0.404842	0.00136305	211.824	-0.411411	-0.313662	0.00779082	191.349	-0.569365	8.85425e-09	220.594	-0.4278	0.000102645	204.667	-0.436942	0.486163	1.24488e-06	268.933	0.231319	0.0179254	302.308	0.371603	0.000218709	284.242	0.363028
CGI_10012774	-0.387885	-0.485096	NS	-0.436491	Amyloid beta A4 precursor -binding family A member 2	0.7759		-0.41608	0.00142229	1703.67	-0.312316	0.00952306	1700.6	-0.43526	0.000149259	1750.97	-0.387885	-0.51279	3.63059e-07	1613.09	-0.41181	6.16317e-07	1608.53	-0.530687	1.86104e-11	1658.69	-0.485096	-0.235198	0.0277785	1848.6	NS	NS	NS	-0.252326	0.00203896	1898.86	NS
CGI_10012576	-0.594408	-0.30594	NS	-0.450174	Non-histone 10	0.6155		-0.580415	0.000119711	112.07	-0.623316	5.4457e-05	118.773	-0.579495	0.000257823	114.367	-0.594408	-0.292015	0.0306696	118.957	-0.337619	0.0146594	125.913	-0.288186	0.0454458	121.466	-0.30594	0.221964	0.0452867	149.966	NS	NS	NS	NS	NS	NS	NS
CGI_10013587	-0.527686	-0.377524	NS	-0.452605	Polycystic kidney disease 1-like 2	0.569		-0.529802	2.8976e-05	138.169	-0.492853	0.000190023	141.421	-0.560402	0.000215877	142.921	-0.527686	-0.379551	0.00319175	140.584	-0.344909	0.0108329	144.044	-0.408111	0.00727241	145.396	-0.377524	NS	NS	NS	NS	NS	NS	NS	NS	NS	NS
CGI_10024158	-0.508421	-0.412651	NS	-0.460536	LPS-induced TNF-alpha factor	0.778		-0.414171	6.90157e-05	374.073	-0.608499	5.68085e-12	421.503	-0.502593	4.20006e-05	395.78	-0.508421	-0.318809	0.0024334	374.969	-0.515276	2.3097e-09	421.716	-0.403867	0.0011574	396.573	-0.412651	NS	NS	NS	-0.227884	0.00212761	484.605	NS	NS	NS	NS
CGI_10028718	-0.410471	-0.543156	NS	-0.476814	Major facilitator superfamily domain-containing 4	0.629		-0.443335	6.85404e-05	195.523	-0.295651	0.0108277	191.937	-0.492428	3.89947e-06	203.534	-0.410471	-0.576257	1.37749e-08	183.123	-0.430945	2.96886e-05	179.382	-0.622267	1.63015e-10	190.858	-0.543156	NS	NS	NS	NS	NS	NS	NS	NS	NS	NS
CGI_10018511	-0.478228	-0.494823	NS	-0.486526	hypothetical protein CGI_10018511	0.9725		-0.398385	0.00182079	88.6302	-0.469068	0.000431548	94.8	-0.567233	1.08759e-05	96.8752	-0.478228	-0.415992	0.00171334	85.8723	-0.48777	0.000389181	91.8964	-0.580707	1.06065e-05	93.9257	-0.494823	0.258132	0.0298206	113.958	NS	NS	NS	NS	NS	NS	NS
CGI_10025403	-0.527353	-0.448173	NS	-0.487763	Developmentally-regulated GTP-binding 2	0.91		-0.350951	0.000809862	326.039	-0.782517	1.32707e-14	406.345	-0.448591	7.35953e-05	346.125	-0.527353	-0.272047	0.00908971	325.115	-0.705592	1.01381e-12	403.81	-0.366879	0.00108296	345.03	-0.448173	NS	NS	NS	-0.393028	4.1339e-06	465.312	NS	NS	NS	NS
CGI_10028292	-0.510547	-0.48891	NS	-0.499728	PREDICTED: uncharacterized protein LOC105333801 [Crassostrea gigas]	0.599		-0.454087	1.16189e-05	237.264	-0.606869	6.81048e-14	262.618	-0.470684	4.68899e-07	243.526	-0.510547	-0.43278	0.000197397	232.384	-0.587616	2.98279e-10	257.235	-0.446335	2.64723e-05	238.638	-0.48891	NS	NS	NS	NS	NS	NS	NS	NS	NS	NS
CGI_10020285	-0.534059	-0.485779	NS	-0.509919	target of rapamycin complex 2 subunit MAPKAP1 isoform X2	0.6255		-0.737082	2.84111e-13	232.837	-0.321161	0.00538051	203.853	-0.543935	7.48352e-08	218.532	-0.534059	-0.689178	1.31957e-14	229.126	-0.275587	0.00901169	201.083	-0.492571	4.35717e-08	215.362	-0.485779	-0.488701	1.78357e-07	255.422	NS	NS	NS	-0.293289	0.0022112	241.084	NS
CGI_10020670	-0.621387	-0.41703	NS	-0.519208	mono [ADP-ribose] polymerase PARP16-like	0.683		-0.54452	1.12519e-05	103.441	-0.63355	1.68899e-07	111.721	-0.68609	3.81751e-08	111.883	-0.621387	-0.340544	0.00928486	106.9	-0.431341	0.00055556	115.248	-0.479204	0.000156541	115.291	-0.41703	NS	NS	NS	NS	NS	NS	NS	NS	NS	NS
CGI_10018850	-0.44273	-0.596495	NS	-0.519613	monocarboxylate transporter 14-like [Crassostrea gigas]	0.588		-0.504467	0.00810982	1038.04	-0.335652	0.022713	1004.59	-0.488072	0.000273325	1047.39	-0.44273	-0.656763	7.28212e-05	968.267	-0.492262	1.19967e-05	934.37	-0.64046	4.08604e-10	977.074	-0.596495	NS	NS	NS	NS	NS	NS	NS	NS	NS	NS
CGI_10024446	-0.500085	-0.546142	NS	-0.523114	aquaporin-like isoform X1 [Crassostrea gigas]	0.656		-0.329608	0.0412304	65.7526	-0.384654	0.0116659	69.8823	-0.785994	4.77607e-08	81.3745	-0.500085	-0.376839	0.0222334	63.0806	-0.433749	0.00555628	67.0837	-0.827837	1.65252e-08	78.3027	-0.546142	NS	NS	NS	NS	NS	NS	-0.412072	0.0103954	92.4371	NS
CGI_10025172	-0.475716	-0.578045	NS	-0.52688	gastrin-releasing peptide receptor-like	0.596		-0.476488	0.0141676	47.0169	-0.436968	0.0379683	48.1308	-0.513693	0.0101531	48.8228	-0.475716	-0.580534	0.00667623	44.368	-0.540897	0.0185841	45.4198	-0.612703	0.00478396	46.1275	-0.578045	NS	NS	NS	NS	NS	NS	NS	NS	NS	NS
CGI_10019245	-0.601271	-0.467257	NS	-0.534264	Kinesin KIF26A	0.739		-0.7943	7.4279e-17	249.409	-0.343892	0.000307168	214.709	-0.66562	1.01667e-15	240.197	-0.601271	-0.660744	2.17213e-12	251.376	-0.212549	0.0360002	218.023	-0.528479	1.73479e-10	242.715	-0.467257	-0.360855	0.000615142	288.474	NS	NS	NS	-0.228607	0.0168078	279.704	NS
CGI_10013974	-0.570727	-0.497874	NS	-0.534301	aldose 1-epimerase-like	0.6885		-0.722684	4.85261e-16	1424.83	-0.508463	8.48272e-06	1355.39	-0.481034	1.43514e-07	1312.67	-0.570727	-0.650344	5.30398e-21	1414.97	-0.437682	1.12867e-05	1348.84	-0.405597	7.65749e-09	1306.94	-0.497874	-0.367376	7.81956e-06	1615.39	NS	NS	NS	NS	NS	NS	NS
CGI_10017345	-0.539619	-0.563402	NS	-0.55151	beta-lactamase 4	0.5865		-0.832386	5.36049e-13	498.116	-0.402547	0.00637751	431.377	-0.383922	0.000372649	419.155	-0.539619	-0.851393	5.01648e-07	480.453	-0.43137	0.0322171	415.483	-0.407442	0.020623	403.787	-0.563402	NS	NS	NS	0.406992	0.00320958	589.573	0.438109	5.53044e-06	574.413	NS
CGI_10021911	-0.581475	-0.528482	NS	-0.554978	probable palmitoyltransferase ZDHHC24	0.5875		-0.526724	4.15914e-08	162.923	-0.635704	3.017e-09	177.8	-0.581996	9.72744e-10	170.314	-0.581475	-0.473828	3.28509e-05	160.812	-0.585146	2.22111e-06	175.452	-0.526471	2.61174e-06	168.144	-0.528482	0.212589	0.0228628	213.25	NS	NS	NS	NS	NS	NS	NS
CGI_10022233	-0.517818	-0.595323	NS	-0.556571	trifunctional nucleotide phosphoesterase -like	0.758		-0.320271	0.0106806	173.988	-0.32305	0.0100643	181.117	-0.910134	8.70365e-21	227.537	-0.517818	-0.399274	0.00360009	165.165	-0.403956	0.0031181	171.992	-0.982738	1.31202e-19	217.285	-0.595323	0.786444	2.42669e-14	271.508	0.780705	4.18835e-14	282.463	0.201357	0.0420095	328.309	0.589502
CGI_10002362	-0.559865	-0.566157	NS	-0.563011	PREDICTED: uncharacterized protein LOC105318453	0.71		-0.552956	0.00532363	58.9944	-0.488273	0.00123386	59.2362	-0.638367	8.44382e-05	62.1032	-0.559865	-0.560048	0.0190333	57.0935	-0.498132	0.00911207	57.3426	-0.640291	0.0014357	60.1367	-0.566157	NS	NS	NS	NS	NS	NS	-0.454328	0.00724084	66.9195	NS
CGI_10027870	-0.532919	-0.604549	NS	-0.568734	potassium voltage-gated channel subfamily H member 2-like	0.7325		-0.345391	0.0087863	138.727	-0.556973	6.75697e-08	157.496	-0.696393	2.84411e-11	163.947	-0.532919	-0.417158	0.00221186	132.045	-0.63135	5.53515e-09	150.247	-0.765139	2.08962e-12	156.577	-0.604549	0.254217	0.039014	175.111	NS	NS	NS	NS	NS	NS	NS
CGI_10022020	-0.453347	-0.69715	NS	-0.575248	mediator of RNA polymerase II transcription subunit 15-like	1		-0.492415	1.47223e-11	517.338	-0.291293	0.00059748	497.542	-0.576332	1.68101e-14	546.731	-0.453347	-0.736148	4.79087e-20	470.767	-0.537952	9.93071e-10	450.291	-0.81735	7.76108e-24	498.867	-0.69715	NS	NS	NS	NS	NS	NS	NS	NS	NS	NS
CGI_10003100	-0.766558	-0.42613	NS	-0.596344	transmembrane 2-like	0.5705		-0.721886	3.93155e-16	419.02	-0.684441	7.79953e-24	428.229	-0.893347	2.28302e-39	460.573	-0.766558	-0.383556	0.00620319	448.105	-0.346914	0.00605202	458.821	-0.547918	4.50549e-06	489.62	-0.42613	0.249363	0.0133336	586.512	0.2886	0.00021101	602.2	NS	NS	NS	NS
CGI_10020664	-0.605329	-0.588248	NS	-0.596789	contactin-like	0.584		-0.544578	0.0073407	41.3972	-0.654432	0.000715554	45.0665	-0.616977	0.00042444	43.4686	-0.605329	-0.528734	0.00933386	40.4834	-0.639028	0.000959617	44.0863	-0.596982	0.000719881	42.523	-0.588248	NS	NS	NS	NS	NS	NS	NS	NS	NS	NS
CGI_10006275	-0.683481	-0.528364	NS	-0.605923	hypothetical protein CGI_10006275	0.6555		-0.571215	0.00244527	53.1124	-0.606937	0.00123386	56.0976	-0.872292	4.73979e-08	61.7944	-0.683481	-0.417495	0.0269594	54.0931	-0.454664	0.0151922	57.1089	-0.712933	4.41487e-06	62.6094	-0.528364	0.365726	0.0354266	75.2118	NS	NS	NS	NS	NS	NS	NS
CGI_10019704	-0.886905	-0.328945	NS	-0.607925	carnosine synthase 1	0.6555		-0.859646	1.92418e-09	3504.27	-0.890023	1.00077e-07	3709.46	-0.911047	2.52104e-10	3662.04	-0.886905	-0.300454	0.00163069	4002.07	-0.336781	0.0162842	4226.63	-0.349601	0.000311706	4169.47	-0.328945	0.192226	0.0297106	4989.58	NS	NS	NS	NS	NS	NS	NS
CGI_10005444	-0.559551	-0.668098	NS	-0.613825	phospholipase B-like 2 isoform X2	0.678		-0.426852	0.00381259	130.276	-0.740832	2.01127e-08	154.953	-0.510971	6.32787e-05	137.59	-0.559551	-0.536035	0.00150938	122.748	-0.849738	2.6373e-08	146.678	-0.61852	3.64801e-05	129.842	-0.668098	NS	NS	NS	-0.326447	0.00356869	179.149	NS	NS	NS	NS
CGI_10012448	-0.644192	-0.586532	NS	-0.615362	probable G- coupled receptor 139 isoform X1 [Lingula anatina]	0.567		-0.576297	0.0219908	32.4847	-0.588156	0.0149511	34.0093	-0.768123	0.000656329	36.1467	-0.644192	-0.522336	0.0201473	32.1613	-0.53089	0.0151629	33.6716	-0.706372	0.00045176	35.748	-0.586532	NS	NS	NS	NS	NS	NS	NS	NS	NS	NS
CGI_10006208	-0.76201	-0.472459	NS	-0.617235	voltage-dependent calcium channel gamma-5 subunit-like	0.6275		-0.658068	0.000199496	84.3809	-1.0442	3.09865e-13	104.567	-0.583758	9.35542e-05	83.2102	-0.76201	-0.370208	0.0343946	89.5569	-0.756437	1.2756e-08	109.552	-0.290731	0.0497021	88.6115	-0.472459	NS	NS	NS	-0.486992	0.000332435	124.152	NS	NS	NS	NS
CGI_10025261	-0.730919	-0.511249	NS	-0.621084	urea-proton symporter DUR3-like	0.681		-0.631309	0.0013709	135.555	-0.826535	1.66864e-06	153.591	-0.734911	1.10339e-05	144.273	-0.730919	-0.414419	0.0295648	140.695	-0.608425	0.000144856	158.694	-0.510904	0.000970541	149.475	-0.511249	NS	NS	NS	NS	NS	NS	NS	NS	NS	NS
CGI_10012534	-0.657254	-0.586442	NS	-0.621848	cephalotocin receptor 1-like [Crassostrea gigas]	0.6435		-0.63992	0.000892135	45.4247	-0.732864	1.88274e-05	49.1219	-0.598978	0.0108197	45.7606	-0.657254	-0.569943	0.0047503	44.9528	-0.661713	0.000229436	48.606	-0.52767	0.0288013	45.3225	-0.586442	NS	NS	NS	NS	NS	NS	NS	NS	NS	NS
CGI_10025303	-0.63784	-0.607512	NS	-0.622676	carbohydrate sulfotransferase 11-like isoform X2 [Crassostrea gigas]	0.67		-0.574814	8.14313e-07	140.252	-0.678147	1.6113e-06	152.92	-0.660558	3.75322e-10	148.287	-0.63784	-0.545053	9.17139e-06	137.571	-0.649998	8.026e-06	149.997	-0.627485	1.41706e-08	145.476	-0.607512	NS	NS	NS	NS	NS	NS	NS	NS	NS	NS
CGI_10027438	-0.57016	-0.677729	NS	-0.623945	zygote arrest 1-like	0.6215		-0.527212	0.000450016	429.805	-0.352253	0.0309668	416.578	-0.831015	1.8373e-06	503.388	-0.57016	-0.636169	4.45698e-06	405.759	-0.462984	0.00186629	392.464	-0.934034	1.32679e-08	477.19	-0.677729	NS	NS	NS	NS	NS	NS	NS	NS	NS	NS
CGI_10007718	-0.682051	-0.567339	NS	-0.624695	serine threonine- kinase pats1	0.629		-0.724877	6.01179e-11	224.03	-0.712645	4.86346e-13	231.903	-0.608631	9.60051e-10	217.392	-0.682051	-0.608981	0.000177044	224.282	-0.600278	8.48292e-05	232.295	-0.492759	0.0015313	218.035	-0.567339	0.302617	0.0100133	321.068	0.314726	0.00272339	332.809	0.423974	2.7077e-05	316.173	0.347106
CGI_10003096	-0.533641	-0.72156	NS	-0.6276	Polycystic kidney disease 1-like 2	0.556		-0.490792	0.0145728	60.9419	-0.588648	0.0101826	66.2411	-0.521482	0.00265498	62.8448	-0.533641	-0.681013	0.00244306	56.0841	-0.771418	0.00184723	61.1421	-0.71225	0.000321993	57.8924	-0.72156	NS	NS	NS	NS	NS	NS	0.308528	0.0413029	85.6432	NS
CGI_10027245	-0.396424	-0.860803	NS	-0.628613	PREDICTED: uncharacterized protein LOC105338663 isoform X1 [Crassostrea gigas]	0.84		-0.467026	0.00228611	231.897	-0.32085	0.0250021	227.289	-0.401395	0.00243923	229.983	-0.396424	-0.928882	1.29209e-10	199.406	-0.788487	1.89576e-09	193.95	-0.86504	3.02051e-12	197.101	-0.860803	NS	NS	NS	NS	NS	NS	NS	NS	NS	NS
CGI_10000748	-0.414203	-0.853611	NS	-0.633907	ceramide kinase-like isoform X2	0.7155		-0.475794	2.68797e-06	169.106	-0.44433	1.61064e-06	173.755	-0.322484	0.0213179	162.734	-0.414203	-0.916313	4.76425e-17	146.437	-0.889619	7.27783e-19	150.298	-0.754901	4.53997e-08	139.919	-0.853611	NS	NS	NS	NS	NS	NS	NS	NS	NS	NS
CGI_10027045	-0.645301	-0.623096	NS	-0.634198	3-ketodihydrosphingosine reductase	0.761		-1.29605	5.1972e-59	374.658	-0.295016	0.00352238	250.161	-0.344838	0.000514281	250.417	-0.645301	-1.27334	1.01527e-55	366.217	-0.275738	0.00817195	245.157	-0.320211	0.00157676	245.436	-0.623096	-0.961912	7.72961e-47	413.299	NS	NS	NS	NS	NS	NS	NS
CGI_10013783	-0.646783	-0.62266	NS	-0.634722	NA	0		-1.13203	1.23221e-31	502.946	-0.465672	2.18499e-08	388.383	-0.342651	0.00257111	363.299	-0.646783	-1.10719	7.78967e-29	491.992	-0.444113	3.33136e-07	380.699	-0.31668	0.00703318	356.261	-0.62266	NS	NS	NS	0.709349	6.53708e-24	610.903	0.832454	5.81057e-19	581.355	NS
CGI_10012475	-0.552382	-0.721236	NS	-0.636809	transport Sec61 subunit gamma isoform X1	0.968		-0.498208	2.73837e-08	1317.2	-0.606106	1.70351e-11	1433.62	-0.552832	4.29983e-07	1375.98	-0.552382	-0.66769	1.67251e-09	1221.55	-0.777568	1.10026e-12	1332.88	-0.718449	7.37012e-09	1277.94	-0.721236	NS	NS	NS	NS	NS	NS	NS	NS	NS	NS
CGI_10027562	-0.535043	-0.744212	NS	-0.639628	neuroglian-like isoform X1 [Crassostrea gigas]	0.6685		-0.442518	0.0115852	121.131	-0.506009	0.00110881	129.361	-0.656603	2.80322e-05	135.268	-0.535043	-0.652153	1.98008e-05	110.924	-0.717051	1.17248e-07	118.701	-0.863431	4.25127e-10	124.583	-0.744212	NS	NS	NS	NS	NS	NS	NS	NS	NS	NS
CGI_10011678	-0.605438	-0.692922	NS	-0.64918	Beta-lactamase [Crassostrea gigas]	0.685		-0.828911	1.87748e-11	127.996	-0.5045	0.000341636	115.682	-0.482903	0.000114919	112.242	-0.605438	-0.915038	1.10503e-09	121.642	-0.595139	0.000382899	109.578	-0.56859	0.000206658	106.31	-0.692922	NS	NS	NS	0.421876	0.000642641	163.736	0.452308	2.3217e-05	159.392	NS
CGI_10015274	-0.762809	-0.538732	NS	-0.650771	alpha-L-fucosidase-like isoform X2	0.789		-0.720488	1.19903e-09	837.42	-1.03875	9.91218e-25	1005.72	-0.529188	4.71917e-08	786.145	-0.762809	-0.497156	9.88013e-08	868.296	-0.818244	1.28336e-30	1034.8	-0.300796	3.73719e-07	819.907	-0.538732	NS	NS	NS	-0.480046	3.82032e-08	1193.43	NS	NS	NS	NS
CGI_10024167	-0.81911	-0.495744	NS	-0.657427	N-acetyltransferase 9	0.716		-0.875255	5.65353e-13	116.319	-0.665019	5.08388e-08	110.047	-0.917058	2.56565e-10	121.23	-0.81911	-0.552181	0.000278521	123.408	-0.345225	0.0318463	117.756	-0.589827	0.000590461	128.468	-0.495744	-0.254496	0.0358693	142.121	NS	NS	NS	-0.299256	0.0392556	147.603	NS
CGI_10002625	-0.753495	-0.573888	NS	-0.663692	gamma-glutamyltranspeptidase 1-like isoform X2	0.7295		-0.394507	1.54364e-05	818.757	-0.773328	5.10847e-24	998.229	-1.09265	3.03751e-30	1136.19	-0.753495	-0.214605	0.012857	843.258	-0.596257	1.00841e-20	1020.16	-0.910804	7.03156e-26	1153.53	-0.573888	NS	NS	NS	-0.428529	2.98034e-09	1126.64	-0.744744	2.85666e-16	1265.58	NS
CGI_10017056	-0.776274	-0.5745	NS	-0.675387	uncharacterized calcium-binding [Ceratitis capitata]	0.873		-0.605341	2.31155e-08	118.077	-0.912441	7.57291e-17	140.642	-0.811041	9.51732e-16	131.635	-0.776274	-0.404623	0.000746035	121.87	-0.712306	1.01069e-09	144.177	-0.606572	1.80984e-08	135.263	-0.5745	NS	NS	NS	NS	NS	NS	NS	NS	NS	NS
CGI_10001845	-0.733275	-0.624804	NS	-0.67904	probable phytanoyl- dioxygenase	0.648		-0.775996	6.67908e-24	602.556	-0.785872	2.74208e-30	629.27	-0.637957	9.03119e-18	578.798	-0.733275	-0.667469	1.13267e-16	603.474	-0.680001	1.49672e-21	630.388	-0.526942	1.06604e-11	580.941	-0.624804	-0.310294	0.00160929	704.412	-0.322594	0.00027119	735.265	NS	NS	NS	NS
CGI_10025463	-0.720607	-0.640521	NS	-0.680564	multiple epidermal growth factor-like domains 10	0.829		-0.730022	0.000143759	43.9541	-0.662557	0.00324581	44.5345	-0.769244	0.000134347	45.7126	-0.720607	-0.650045	0.0122783	43.3202	-0.586918	0.0412105	43.92	-0.6846	0.00870129	45.048	-0.640521	NS	NS	NS	NS	NS	NS	NS	NS	NS	NS
CGI_10011633	-0.981676	-0.389626	NS	-0.685651	synaptotagmin-7-like [Lingula anatina]	0.614		-0.927579	2.56955e-14	107.761	-1.06239	5.55977e-18	119.724	-0.955062	1.35e-13	111.51	-0.981676	-0.335774	0.0106642	123.568	-0.472209	0.000200418	136.015	-0.360897	0.00841722	127.656	-0.389626	NS	NS	NS	-0.307769	0.0218576	150.357	NS	NS	NS	NS
[truncated: 704 more rows]
