# Supplementary material for: Differential basal expression of immune genes confers Crassostrea gigas resistance to Pacific oyster mortality syndrome
Source: BMC Genomics. 2020 Jan 20;21:63. doi: 10.1186/s12864-020-6471-x (PMC6971885; doi:10.1186/s12864-020-6471-x)
Supplement: Supplementary file 3 — Additional file 3. List of DEGs specifics to the RF21 oyster family. This table presents the Log2 fold change of each CGI differentially expressed (significant) only in the the RF21 oyster family compared to the three susceptible families (SF11, SF14 and SF15), the Blast results, the enriched functional categories and details of each comparison (Log2 fold change, p-value, GO categories and number of reads). [file 12864_2020_6471_MOESM3_ESM.xlsx]

## Sheet: Feuil1
N° CGI	Log2_Fold change_RF21 VS SF11	pval_RF21 VS SF11	Reads_RF21 VS SF11	Log2_Fold change_RF21 VS SF14	pval_RF21 VS SF14	Reads_RF21 VS SF14	Log2_Fold change_RF21 VS SF15	pval_RF21 VS SF15	Reads_RF21 VS SF15	Log2_Fold change_Mean	Blast	MeanSimilarity	Enrichment	GO
CGI_10003123	3.27299	1.16242e-58	254.388	2.5758	2.02417e-33	279.376	2.2208	5.95135e-43	286.597	2.68986	microfibril-associated glyco 4-like	0.8455	defense response ; response to stress	GO:0006952
CGI_10016296	2.05886	2.50357e-17	139.481	1.03051	0.000356226	174.192	4.84746	6.85458e-60	119.804	2.64561	microfibril-associated glyco 4-like	0.788	defense response ; response to stress	GO:0016021;GO:0006952
CGI_10002660	2.17201	1.25205e-80	887.906	2.22905	8.49831e-76	917.116	3.31391	1.22713e-171	816.553	2.57166	ficolin-2-like [Crassostrea gigas]	0.7745	defense response ; response to stress	GO:0006952
CGI_10026100	2.49814	7.4019e-15	14.356	3.62476	1.62544e-21	13.6263	0.704541	0.00737273	20.5908	2.27581	myeloid differentiation primary response 88-like [Crassostrea gigas]	0.6735	defense response ; response to stress	GO:0007165;GO:0006952;GO:0008063;GO:0050776
CGI_10002045	2.21997	7.46713e-32	119.682	2.83172	1.47671e-09	106.746	1.41013	2.93157e-16	138.848	2.15394	ryncolin-1-like	0.791	defense response ; response to stress	GO:0016021;GO:0006952
CGI_10022836	3.68305	1.03736e-113	1648.53	0.927849	8.32858e-07	2422.5	1.67552	2.38944e-20	2039.17	2.09547	microfibril-associated glyco 4-like	0.7245	defense response ; response to stress	GO:0006952
CGI_10020135	0.400557	0.0452329	1862.16	1.78329	4.63159e-15	1404.34	3.75157	2.05584e-126	1160.63	1.97847	Fibrinogen-like protein A	0.7195	defense response ; response to stress	GO:0006952
CGI_10014317	1.15865	7.83032e-29	193.028	0.967689	1.18899e-10	209.027	2.24273	7.06529e-81	164.507	1.45636	ryncolin-1-like	0.68	defense response ; response to stress	GO:0006952
CGI_10007043	1.9145	7.80598e-29	261.921	1.70439	1.06061e-17	280.79	0.618499	1.41239e-07	351.723	1.41246	microfibril-associated glyco 4-like	0.8705	defense response ; response to stress	GO:0006952
CGI_10001346	1.28532	2.7828e-05	11.8107	1.69388	3.13526e-07	11.3591	1.24955	9.16765e-05	12.0794	1.40958	Toll-like receptor 13	0.751	defense response ; response to stress	GO:0007165;GO:0006952;GO:0008063;GO:0050776
CGI_10026883	2.3597	1.77928e-15	17.8929	0.976688	0.000343135	23.8341	0.808197	0.000794204	24.5358	1.38153	Fibrinogen C domain-containing partial	0.86	defense response ; response to stress	GO:0016021;GO:0006952
CGI_10028870	0.933	2.99747e-05	46.7223	1.23214	2.49323e-08	45.4451	1.27983	7.15815e-08	43.9518	1.14832	toll-like receptor 2 type-2-like	0.577	defense response ; response to stress	GO:0007165;GO:0016021;GO:0006952;GO:0008063;GO:0050776
CGI_10021876	0.942857	1.55427e-12	81.9611	1.669	7.52981e-29	73.6438	0.757728	1.61637e-07	87.6072	1.1232	Vacuolar 8	0.6765	defense response ; response to stress	GO:0007165;GO:0006952;GO:0008063;GO:0050776
CGI_10024348	0.898805	0.0347468	6.43275	1.31488	0.00211063	5.97302	1.10576	0.0092713	6.21867	1.10648	microfibril-associated glyco 4-like	0.8295	defense response ; response to stress	GO:0016021;GO:0006952
CGI_10024436	0.802492	0.00525422	15.9431	1.5372	1.67001e-07	14.0736	0.939306	0.000871201	15.7994	1.093	fibrinogen 1 [Poecilia formosa]	0.5235	defense response ; response to stress	GO:0006952
CGI_10010804	0.884569	0.0022344	13.6086	1.24775	8.18771e-05	12.9703	0.839771	0.00650416	14.063	0.990698	microfibril-associated glyco 4-like	0.6155	defense response ; response to stress	GO:0006952
CGI_10001352	0.504934	0.0429218	137.07	1.37069	7.13194e-12	115.629	1.04432	1.90739e-07	121.762	0.973315	microfibril-associated glyco 4-like	0.7195	defense response ; response to stress	GO:0006952
CGI_10022340	1.03136	0.000255646	51.9287	0.534867	0.033856	62.2843	1.11512	3.51091e-06	52.3963	0.893784	microfibril-associated glyco 4-like	0.8145	defense response ; response to stress	GO:0016020;GO:0006952
CGI_10017269	0.509426	1.97525e-06	262.336	0.902204	1.40232e-12	245.479	0.737135	1.91115e-14	251.474	0.716255	partial [Drosophila simulans]	0.5995	defense response ; response to stress	GO:0007165;GO:0045087;GO:0016021;GO:0006952;GO:0008063;GO:0050776
CGI_10027545	0.710356	1.39107e-27	2437.78	0.867125	1.29302e-30	2436.64	0.253468	0.00155727	2840.09	0.610316	Transient receptor potential cation channel subfamily M member 3	0.748	defense response ; response to stress	GO:0005216;GO:0034220;GO:0016021;GO:0006952
CGI_10006284	0.471733	3.13192e-14	429.423	0.266367	0.00103602	475.474	0.232747	0.000203974	471.75	0.323616	toll interleukin-1 receptor domain-containing adapter isoform X2 [Lepisosteus oculatus]	0.6407	defense response ; response to stress	GO:0007165;GO:0006952;GO:0008063;GO:0050776
CGI_10026099	0.281358	4.00589e-06	1438.41	0.463692	2.88727e-15	1416.02	0.218901	0.000565245	1497.36	0.321317	myeloid differentiation primary response 88-like [Crassostrea gigas]	0.7265	defense response ; response to stress	GO:0007165;GO:0006952;GO:0008063;GO:0050776
CGI_10016949	0.282437	4.40321e-08	7440.6	0.356428	3.6293e-10	7566.15	0.159736	0.0136387	7896.4	0.2662	Nuclear Factor of Kappa light polypeptide gene enhancer in b(B)-cells n [Caenorhabditis elegans]	0.628	defense response ; response to stress	GO:0006952;GO:0008063;GO:0050776
CGI_10014826	-0.353067	3.40564e-06	867.518	-0.216511	0.00152915	856.38	-0.204077	0.0238809	836.117	-0.257885	nitric oxide brain-like isoform X1 [Crassostrea gigas]	0.7715	defense response ; response to stress	GO:0010181;GO:0007263;GO:0031284;GO:0045909;GO:0045776;GO:0005622;GO:0020037;GO:0005516;GO:0050661;GO:0004517;GO:0005506;GO:0050660;GO:0055114;GO:0006809;GO:0006952;GO:0006979
CGI_10026493	-0.571975	1.50548e-08	322.986	-0.296727	0.000339835	300.769	-0.244043	0.0177963	289.119	-0.370915	Toll-like receptor	0.6185	defense response ; response to stress	GO:0007165;GO:0006952;GO:0008063;GO:0050776
CGI_10004837	-0.459809	0.00101864	93.6305	-0.502258	0.000638928	99.1359	-0.668725	2.11291e-05	104.463	-0.543597	inhibitor of nuclear factor-kappaB	0.693	defense response ; response to stress	GO:0006952;GO:0008063;GO:0050776
CGI_10021064	-0.305169	0.0368629	96.1009	-0.736303	5.87797e-07	120.123	-0.760434	2.63515e-09	118.722	-0.600636	Ficolin-2	0.7415	defense response ; response to stress	GO:0006952
CGI_10008641	-0.475429	0.00259407	145.651	-0.982372	4.0084e-15	189.168	-0.372417	0.0143001	142.229	-0.610073	microfibril-associated glyco 4-like	0.7285	defense response ; response to stress	GO:0006952
CGI_10000088	-0.657292	0.000260771	62.7067	-0.519783	0.002798	61.2751	-0.905454	6.84595e-08	71.506	-0.694176	microfibril-associated glyco 4-like	0.8365	defense response ; response to stress	GO:0016021;GO:0006952
CGI_10021136	-1.03083	4.1768e-20	282.394	-0.590591	0.00107755	242.526	-0.646555	3.55879e-07	242.498	-0.755993	Toll-like receptor 1	0.6315	defense response ; response to stress	GO:0007165;GO:0016021;GO:0006952;GO:0008063;GO:0050776
CGI_10000165	-0.902559	5.85262e-05	30.236	-0.728088	0.00321526	29.0072	-0.994738	5.64912e-07	32.02	-0.875128	Interleukin-1 receptor-associated kinase 4	0.7355	defense response ; response to stress	GO:0005524;GO:0004674;GO:0006468;GO:0006952;GO:0070098;GO:0050776
CGI_10013672	-0.951264	5.43405e-08	143.826	-0.831891	1.57036e-05	141.545	-0.877826	1.62357e-07	141.302	-0.886994	myeloid differentiation primary response 88-like [Crassostrea gigas]	0.712	defense response ; response to stress	GO:0007165;GO:0006952;GO:0008063;GO:0050776
CGI_10016953	-1.33421	3.20265e-32	646.338	-0.491764	2.26351e-06	455.472	-1.0618	5.91859e-27	575.337	-0.962592	serine threonine- kinase TBK1-like isoform X2 [Crassostrea gigas]	0.96	defense response ; response to stress	GO:0005634;GO:0046872;GO:0016310;GO:0006886;GO:0016301;GO:0000398;GO:0006952;GO:0008063;GO:0050776
CGI_10011912	-1.20505	8.85858e-07	69.9566	-1.26654	1.62907e-07	74.8247	-0.844481	0.000646922	59.088	-1.10536	tyrosinase tyr-3	0.62	defense response ; response to stress	GO:0016491;GO:0046872;GO:0055114;GO:0016740;GO:0006952;GO:0006954
CGI_10016587	-0.524515	0.000230346	91.6109	-1.94752	7.25924e-50	193.148	-0.881854	7.56915e-05	110.742	-1.11796	microfibril-associated glyco 4-like	0.749	defense response ; response to stress	GO:0006952
CGI_10019716	-1.00665	0.0384003	3.43063	-1.07039	0.0229823	3.54157	-1.3971	0.00231635	4.5097	-1.15805	Toll-like receptor 2	0.718	defense response ; response to stress	GO:0007165;GO:0006952;GO:0008063;GO:0050776
CGI_10011462	-1.16561	0.0134922	4.93756	-1.45521	0.000664981	5.70245	-1.1316	0.0148912	4.57502	-1.25081	Fibrinogen C domain-containing 1	0.7685	defense response ; response to stress	GO:0016021;GO:0006952
CGI_10014279	-1.36073	1.99765e-06	13.8346	-1.66978	2.24313e-08	17.3485	-1.25379	2.05664e-05	13.2885	-1.4281	laccase-1-like [Hydra vulgaris]	0.82	defense response ; response to stress	GO:0005507;GO:0016491;GO:0016021;GO:0055114;GO:0006952;GO:0006954
CGI_10013675	-0.841632	0.00690535	22.4771	-2.56252	4.12672e-42	59.4038	-1.05094	1.48014e-05	24.927	-1.48503	microfibril-associated glyco 4-like	0.816	defense response ; response to stress	GO:0006952
CGI_10002370	-1.92504	8.36109e-35	64.5197	-0.582032	0.00388282	34.0368	-2.01036	9.76942e-28	69.897	-1.50581	fibroleukin-like isoform X2	0.6735	defense response ; response to stress	GO:0016020;GO:0006952
CGI_10000672	-0.46786	0.0163092	70.8586	-2.41406	3.16353e-30	211.604	-1.83764	1.90971e-42	140.654	-1.57319	fibroleukin-like [Crassostrea gigas]	0.672	defense response ; response to stress	GO:0006952
CGI_10019717	-1.99835	5.76307e-12	18.6743	-1.38979	2.85195e-05	13.5936	-1.5037	1.34785e-06	14.1233	-1.63062	Toll-like receptor 2	0.732	defense response ; response to stress	GO:0007165;GO:0006952;GO:0008063;GO:0050776
CGI_10019058	-2.25088	6.18394e-12	13.8148	-1.29494	0.000653145	7.70484	-1.51603	3.50955e-05	8.73456	-1.68728	26S proteasome non-ATPase regulatory subunit 3-like	0.8255	defense response ; response to stress	GO:0050790;GO:0042176;GO:0000502;GO:0030234;GO:0006952
CGI_10017375	-2.34805	4.02888e-50	126.3	-2.13478	3.54665e-30	117.298	-0.733258	0.00489947	55.043	-1.7387	laccase-like isoform X2	0.7185	defense response ; response to stress	GO:0005507;GO:0016491;GO:0055114;GO:0006952;GO:0006954
CGI_10016586	-1.38369	2.58432e-14	92.7666	-3.05134	1.38735e-153	248.508	-2.02003	2.69449e-39	132.844	-2.15169	fibrinogen A	0.637	defense response ; response to stress	GO:0006952
CGI_10007537	-1.81511	1.40314e-09	37.3099	-2.94325	2.64916e-19	89.5264	-1.70041	2.15098e-05	40.4088	-2.15292	laccase-like isoform X2	0.72	defense response ; response to stress	GO:0005507;GO:0016491;GO:0055114;GO:0006952;GO:0006954
CGI_10018708	-3.20208	1.32153e-31	110.573	-1.84737	9.82533e-08	49.1889	-2.31368	1.16024e-10	69.7994	-2.45438	Tenascin- partial	0.824	defense response ; response to stress	GO:0006952
CGI_10027979	-2.16681	3.68102e-19	173.289	-1.54076	4.33754e-10	123.124	-1.17511	1.65087e-05	99.7189	-1.62756	TRAF-TNF receptor-associated factor 6	0.562	defense response ; response to stress protein modification by small protein conjugation or removal	GO:0034097;GO:0043229;GO:0008270;GO:0007166;GO:0009653;GO:0048513;GO:0044444;GO:1902533;GO:0005886;GO:0002376;GO:0002684;GO:0004842;GO:0044093;GO:0051247;GO:0071310;GO:0045893;GO:0030154;GO:0016881;GO:0001819;GO:0035556;GO:0019899;GO:0016567;GO:0006952;GO:0008063;GO:004298GO:0050776
CGI_10000271	0.348719	0.01514	297.424	0.61122	1.32654e-07	286.651	1.80335	9.8169e-32	217.389	0.921096	Clathrin heavy chain 1	0.8975	receptor-mediated endocytosis	GO:0032051;GO:0043209;GO:0008022;GO:0030130;GO:0007030;GO:0005198;GO:0042277;GO:0006886;GO:0030669;GO:0070062;GO:0005925;GO:0043195;GO:0003725;GO:0030506;GO:0001649;GO:0071439;GO:0019901;GO:0031072;GO:1903077;GO:0033572;GO:1900126;GO:0042147;GO:0044822;GO:0030315;GO:0042470;GO:0005739;GO:0005819;GO:0030132;GO:0031523;GO:0031623;GO:0090307
CGI_10020770	0.296881	3.70338e-05	1523.86	0.173535	0.0114775	1649.52	0.196129	0.00628446	1605.81	0.222182	dynamin-1-like isoform X2	0.9055	receptor-mediated endocytosis	GO:0005525;GO:0072583;GO:0003924;GO:0008152
CGI_10020058	-1.07218	5.41425e-23	388.297	-1.33197	3.68969e-39	458.196	-1.37	9.19433e-48	457.306	-1.25805	short-chain collagen C4-like	0.818	receptor-mediated endocytosis	GO:0016020;GO:0005044;GO:0006898
CGI_10004895	1.15246	4.28957e-12	63.8103	1.31769	1.31052e-09	63.7549	0.996542	3.08258e-07	67.3171	1.15556	probable ATP-dependent RNA helicase DDX28	0.639	response to external stimulus	GO:0008152;GO:0004386;GO:0039528;GO:0098586;GO:0050776
CGI_10023201	0.993161	2.38564e-07	158.714	0.616927	4.95656e-10	182.978	1.58654	2.66343e-25	143.963	1.06554	DNA damage-regulated autophagy modulator 2	0.57	response to external stimulus	GO:0010506;GO:0016021;GO:0007601;GO:0010506;GO:0098586
CGI_10017960	0.742002	2.20676e-05	54.8848	1.78053	3.20388e-14	45.4265	0.659308	8.08026e-05	57.2082	1.06061	probable ATP-dependent permease [Bactrocera dorsalis]	0.685	response to external stimulus	GO:0016887;GO:0005524;GO:0008152;GO:0016021;GO:0039528;GO:0098586;GO:0050776
CGI_10016060	0.451183	0.00261974	205.286	0.924048	1.0077e-13	188.043	0.655897	2.50817e-05	197.251	0.677043	poly [ADP-ribose] polymerase 14-like	0.667	response to external stimulus	GO:0008152;GO:0003950;GO:0098586
CGI_10004894	0.505499	0.000939315	70.6544	0.879887	3.3041e-10	66.5979	0.55203	0.000342786	71.3624	0.645805	probable ATP-dependent RNA helicase DDX28	0.572	response to external stimulus	GO:0003676;GO:0005524;GO:0008152;GO:0004386;GO:0039528;GO:0098586;GO:0050776
CGI_10020727	0.601781	1.81479e-05	139.396	0.541729	1.7632e-06	147.501	0.503558	1.88134e-05	146.42	0.549023	ATP-dependent RNA helicase DDX54	0.864	response to external stimulus	GO:0005524;GO:0003714;GO:0016021;GO:0010501;GO:0006396;GO:0030331;GO:0005730;GO:1903507;GO:0004004;GO:0044822;GO:0039528;GO:0098586;GO:0050776
CGI_10015992	0.564508	9.84604e-08	12117.4	0.679774	7.99015e-16	12227.4	0.362337	6.38324e-05	13131.1	0.53554	galactose-3-O-sulfotransferase 2-like isoform X2 [Aplysia californica]	0.5755	response to external stimulus	GO:0009607;GO:0001733;GO:0016021;GO:0009247;GO:0005794
CGI_10017920	0.334	0.0208062	167.63	0.621335	4.23635e-05	160.233	0.36497	0.0257969	169.458	0.440101	probable ATP-dependent RNA helicase DHX35	0.8115	response to external stimulus	GO:0005524;GO:0071013;GO:0005737;GO:0006396;GO:0004004;GO:0044822;GO:0039528;GO:0098586;GO:0050776
CGI_10017067	0.33341	0.0052379	121.196	0.520885	1.84898e-05	119.114	0.349695	0.00502456	123.057	0.40133	Lathosterol oxidase	0.806	response to external stimulus	GO:0005506;GO:0016491;GO:0001878;GO:0016021;GO:0055114;GO:0006633
CGI_10016614	0.222734	0.0498898	691.251	0.387944	2.85145e-10	684.094	0.289383	0.00353771	690.442	0.30002	Exonuclease 3 -5 domain-containing 1	0.7315	response to external stimulus	GO:0003676;GO:0008408;GO:0090305;GO:0098586
CGI_10009423	0.382755	1.52355e-09	1222.36	0.227434	0.000545279	1334.96	0.286999	0.000173199	1284.95	0.299063	Pre-mRNA-processing-splicing factor 8	0.9235	response to external stimulus	GO:0005682;GO:0044822;GO:0000244;GO:0000386;GO:0017070;GO:0030623;GO:0097157;GO:0071013;GO:0071222;GO:0070530;GO:0030619;GO:0016021;GO:0071356;GO:0030620
CGI_10017222	0.344406	0.00049533	820.335	0.267927	0.00137446	874.574	0.263994	0.0039629	858.486	0.292109	poly [ADP-ribose] polymerase 12	0.522	response to external stimulus	GO:0046872;GO:0008152;GO:0003950;GO:0098586
CGI_10015695	0.220894	0.000576382	529.101	0.239367	0.000439442	547.251	0.264588	0.000132482	532.282	0.241616	vesicle-associated membrane synaptobrevin-binding -like isoform X1	0.742	response to external stimulus	GO:0015630;GO:0044829;GO:0007165;GO:0031175;GO:0044828;GO:0090114;GO:0043123;GO:0000139;GO:0004871;GO:0005886;GO:0008017;GO:0005789;GO:0005923;GO:0048471;GO:0008219;GO:0044791;GO:0046982;GO:0016021;GO:0031982;GO:0070972;GO:0033149
CGI_10018486	-0.227261	0.0438326	135.849	-0.278023	0.0172423	144.251	-0.470202	1.15821e-06	152.491	-0.325162	TBC1 domain family member 20-like	0.7475	response to external stimulus	GO:0065008;GO:0008584;GO:0007283;GO:0022607;GO:1902589;GO:0005783;GO:0048524;GO:0048468;GO:0002088;GO:0044403;GO:0044446;GO:0006888;GO:0032989;GO:0016050;GO:0098588;GO:0016021;GO:0010256
CGI_10014800	-0.264904	0.00620604	314.871	-0.396309	0.000248055	344.905	-0.388786	0.000950111	337.346	-0.35	DNA damage-regulated autophagy modulator 2	0.574	response to external stimulus	GO:0016021;GO:0010506;GO:0098586
CGI_10003920	-0.355426	0.0171364	121.335	-0.452018	0.00053805	131.256	-0.296929	0.0250981	120.823	-0.368124	Guanine nucleotide-binding subunit gamma-e	0.709	response to external stimulus	GO:0005834;GO:0010906;GO:0007186;GO:0071244;GO:0005737;GO:0046982;GO:0004871;GO:0007602;GO:0016028
CGI_10014035	-0.772183	1.99408e-10	207.514	-0.618345	6.68897e-12	201.53	-0.355283	0.00846288	177.722	-0.581937	probable ATP-dependent RNA helicase DHX58	0.6315	response to external stimulus	GO:0003677;GO:0005524;GO:0008152;GO:0004386;GO:0042981;GO:0039528;GO:0098586;GO:0050776
CGI_10024492	-0.949313	3.79836e-33	2321.91	-0.480569	2.44127e-08	1970.71	-0.400378	0.000290623	1872.6	-0.610086	Poly [ADP-ribose] polymerase 14	0.6535	response to external stimulus	GO:0000166;GO:0003676;GO:0008152;GO:0003950;GO:0098586
CGI_10014591	-0.977378	3.11812e-18	394.276	-0.591296	1.39731e-09	344.977	-1.10405	2.40841e-11	431.006	-0.89091	DNA damage-regulated autophagy modulator 2	0.673	response to external stimulus	GO:0006914;GO:0045494;GO:0010506;GO:0016021;GO:0005794;GO:0007601;GO:0005764;GO:0010506;GO:0098586
CGI_10027493	-1.33165	0.000197808	9.08127	-1.03788	0.0101764	8.00758	-1.96122	8.30469e-10	13.4195	-1.44358	Poly [ADP-ribose] polymerase 14	0.9392	response to external stimulus	GO:0000166;GO:0003676;GO:0047961;GO:0005739;GO:0008152;GO:0016021;GO:0003950;GO:0098586
CGI_10023396	0.594816	4.98306e-05	2108.48	0.782494	6.23422e-09	2087.59	1.77869	2.16479e-41	1668.79	1.052	NFX1-type zinc finger-containing 1-like	0.628	response to external stimulus ; defense response ; response to stress	GO:0044822;GO:0006952;GO:0006954;GO:0098586
CGI_10027966	0.480535	1.23371e-10	1071.65	0.459581	4.85808e-12	1122.22	0.579078	3.61179e-18	1063.56	0.506398	HMG box-containing 4-like [Limulus polyphemus]	0.8395	response to external stimulus ; defense response ; response to stress	GO:0003677;GO:0016055;GO:0008333;GO:0030178;GO:0016589;GO:0006952;GO:0039528
CGI_10001246	1.6531	2.36621e-09	419.171	1.68825	4.73818e-10	435.327	0.928793	0.000290839	501.467	1.42338	probable E3 ubiquitin- ligase RNF144A	0.578	response to external stimulus protein modification by small protein conjugation or removal	GO:0004842;GO:0006508;GO:0016787;GO:0016567;GO:0098586;GO:0016567;GO:0050776
CGI_10011326	2.19825	2.41478e-19	166.561	1.45969	2.94638e-19	196.8	0.485889	0.00484445	243.774	1.38127	E3 ubiquitin- ligase TRIM33	0.6115	response to external stimulus protein modification by small protein conjugation or removal	GO:0008270;GO:0008152;GO:0005622;GO:0016874;GO:0098586;GO:0016567
CGI_10011458	0.259459	0.0285388	168.762	1.66641	1.35998e-17	124.498	0.797385	7.43729e-11	147.437	0.907752	E3 ubiquitin- ligase TRIM56-like [Lingula anatina]	0.6929	response to external stimulus protein modification by small protein conjugation or removal	GO:0008270;GO:0016021;GO:0005622;GO:0098586;GO:0016567
CGI_10005990	0.66077	6.81785e-10	174.869	0.282649	0.0220239	203.616	0.903263	2.52104e-10	167.475	0.615561	E3 ubiquitin- ligase TRIM36-like	0.9533	response to external stimulus protein modification by small protein conjugation or removal	GO:0008270;GO:0008152;GO:0005622;GO:0016874;GO:0098586;GO:0016567
CGI_10004787	0.519792	5.56092e-06	320.127	0.524735	9.96428e-07	332.683	0.427971	0.000112772	335.559	0.490832	E3 ubiquitin- ligase RNF123-like	0.677	response to external stimulus protein modification by small protein conjugation or removal	GO:0008270;GO:0005737;GO:0098586;GO:0016567
CGI_10025080	0.483961	1.97184e-05	128.71	0.620379	2.91926e-08	129.082	0.331382	0.00560751	137.741	0.478574	E3 ubiquitin- ligase partial	0.7775	response to external stimulus protein modification by small protein conjugation or removal	GO:0008270;GO:0008152;GO:0016021;GO:0016874;GO:0098586;GO:0016567
CGI_10009742	0.277371	0.00194608	2358.86	0.69831	1.14415e-14	2171.8	0.37331	2.37614e-06	2337.21	0.449663	E3 ubiquitin- ligase HACE1-like isoform X2 [Biomphalaria glabrata]	0.6345	response to external stimulus protein modification by small protein conjugation or removal	GO:0005524;GO:0004672;GO:0006468;GO:0098586;GO:0016567
CGI_10028530	0.194242	0.023717	331.013	0.289437	0.000179471	333.884	0.45648	9.68714e-08	311.448	0.313387	E3 ubiquitin- ligase HECTD3	0.7045	response to external stimulus protein modification by small protein conjugation or removal	GO:0005634;GO:0004842;GO:0005737;GO:0016874;GO:0042787;GO:0098586;GO:0016567
CGI_10028474	-0.753464	6.7107e-10	227.598	-0.547838	1.17667e-07	216.248	-0.284625	0.0116167	190.814	-0.528642	E3 ubiquitin- ligase synoviolin A-like	0.75	response to external stimulus protein modification by small protein conjugation or removal	GO:0098586;GO:0016567
CGI_10019296	-0.575755	8.77169e-06	197.489	-0.983643	1.90436e-17	246.521	-0.52069	5.07544e-06	196.735	-0.693363	E3 ubiquitin- ligase TRIM71-like	0.7855	response to external stimulus protein modification by small protein conjugation or removal	GO:0003777;GO:0008270;GO:0008152;GO:0007018;GO:0005622;GO:0098586;GO:0016567
CGI_10011103	-0.491018	0.0178239	47.6242	-0.817018	2.77647e-06	57.2453	-0.974807	6.80523e-08	60.5728	-0.760948	E3 ubiquitin- ligase TRIM56	0.5025	response to external stimulus protein modification by small protein conjugation or removal	GO:0008270;GO:0005622;GO:0002376;GO:0098586;GO:0016567
CGI_10011463	-1.33677	4.3865e-09	29.7905	-0.85849	0.000731583	24.238	-0.667736	0.00947155	21.756	-0.954332	E3 ubiquitin- ligase TRIM71-like isoform X2 [Crassostrea gigas]	0.573	response to external stimulus protein modification by small protein conjugation or removal	GO:0008270;GO:0005622;GO:0098586;GO:0016567
CGI_10027068	-2.13342	1.62819e-16	70.4874	-0.823837	2.26354e-05	33.9613	-0.720256	0.000451161	31.7201	-1.22584	E3 ubiquitin- ligase mib1	0.566	response to external stimulus protein modification by small protein conjugation or removal	GO:0004842;GO:0046872;GO:0016874;GO:0016567;GO:0098586;GO:0016567
CGI_10001501	-1.42921	1.20042e-05	13.1971	-1.03425	0.00264808	10.818	-1.3541	7.42695e-05	12.9064	-1.27252	E3 ubiquitin- ligase HECTD1	0.5595	response to external stimulus protein modification by small protein conjugation or removal	GO:0004842;GO:0046872;GO:0016567;GO:0098586;GO:0016567
CGI_10007364	-1.18986	7.59413e-25	527.886	-0.43424	0.0355697	392.773	-2.31459	5.33987e-56	1007.77	-1.3129	E3 ubiquitin- ligase RNF213-like	0.7505	response to external stimulus protein modification by small protein conjugation or removal	GO:0016887;GO:0004842;GO:0008270;GO:0016567;GO:0098586;GO:0016567
CGI_10001502	-2.17622	4.05261e-06	2.4802	-1.35901	0.00626481	1.2094	-2.32099	1.42768e-06	2.82815	-1.95207	E3 ubiquitin- ligase HERC2	0.787	response to external stimulus protein modification by small protein conjugation or removal	GO:0004842;GO:0046872;GO:0016874;GO:0016567;GO:0098586;GO:0016567
CGI_10026536	-4.64561	1.01691e-50	49.5019	-1.31592	0.00293567	4.56266	-1.33006	0.00355655	4.73307	-2.43053	probable E3 ubiquitin- ligase ARI5	0.5595	response to external stimulus protein modification by small protein conjugation or removal	GO:0004842;GO:0046872;GO:0016021;GO:0016874;GO:0016567;GO:0098586;GO:0016567
CGI_10006581	-2.93604	1.75614e-17	19.672	-5.44314	2.57538e-92	108.656	-1.23616	0.00355718	6.06531	-3.20512	E3 ubiquitin- ligase UPL2-like	0.7725	response to external stimulus protein modification by small protein conjugation or removal	GO:0003676;GO:0098586;GO:0016567
CGI_10005981	2.09933	4.09501e-32	232.23	0.591659	0.00204097	327.49	1.41859	2.78909e-14	263.98	1.36986	Ribosomal RNA-processing 8	0.7595	response to external stimulus response to stress	GO:0003676;GO:0000183;GO:0035064;GO:0033553;GO:0046015;GO:0005730;GO:0008757;GO:0005677;GO:0042149;GO:0032259
CGI_10022112	0.287116	0.049036	1123.3	0.29303	0.0384935	1166.42	0.553736	4.26602e-05	1057.75	0.377961	Translational activator GCN1	0.7575	response to external stimulus response to stress	GO:0005921;GO:0006417;GO:0019901;GO:0006811;GO:0045859;GO:0043022;GO:0034198;GO:0016021;GO:0033674;GO:0019887;GO:0044424
CGI_10006046	0.182479	0.00376908	638.981	0.190467	0.00922314	663.286	0.267337	0.000343318	634.579	0.213428	IMPACT isoform X1	0.6485	response to external stimulus response to stress	GO:0004930;GO:0007186;GO:0010605;GO:0016021;GO:0010468;GO:0032268;GO:2000112;GO:0009267;GO:0051171;GO:0031324
CGI_10008995	-0.599746	0.025839	20.345	-0.812998	0.00125773	23.3262	-0.766435	0.00237127	22.4724	-0.726393	excitatory amino acid transporter 1-like isoform X1	0.726	response to external stimulus response to stress	GO:0055085;GO:0007399;GO:0042221;GO:0008652;GO:0042995;GO:0006950;GO:0005313;GO:0006536;GO:0009628;GO:0009605;GO:0097458;GO:0017153;GO:0016021;GO:0016043;GO:0015813;GO:0016597;GO:0050789;GO:0050877;GO:0016236;GO:0071944;GO:0043090
CGI_10018425	-1.32627	0.00398159	7.41829	-1.47419	0.000830555	8.0552	-3.17742	4.68177e-15	34.317	-1.99262	78 kDa glucose-regulated	0.7995	response to external stimulus response to stress	GO:0016887;GO:0036498;GO:0036499;GO:0005790;GO:0005793;GO:0005788;GO:0021680;GO:0005509;GO:0051087;GO:0031398;GO:0035437;GO:0001948;GO:0034663;GO:0008180;GO:1903891;GO:0019904;GO:1903894;GO:0021589;GO:1903897;GO:0005125;GO:1901998;GO:0005886;GO:0042149;GO:0031625;GO:0030176;GO:0030496;GO:0030335;GO:0034975;GO:0043209;GO:0090074;GO:0040019;GO:0006983;GO:0005524;GO:0070062;GO:0005925;GO:0060904;GO:…
CGI_10028056	0.711645	0.00938301	20.013	0.576666	0.0306447	21.7114	0.80448	0.00248253	19.9598	0.697597	E3 ubiquitin- ligase HUWE1	0.9525	response to external stimulus response to stress protein modification by small protein conjugation or removal	GO:0008270;GO:0070737;GO:0070738;GO:0006284;GO:0000209;GO:0043774;GO:0043773;GO:0006513;GO:0008766;GO:0042787;GO:1903955;GO:0005654;GO:0044822;GO:0003677;GO:0004842;GO:0070062;GO:0005515;GO:0016021;GO:0030154;GO:0005829;GO:0018169;GO:0070740;GO:0016574;GO:0070736;GO:0098586;GO:0016567
CGI_10000063	-1.71338	7.28004e-10	22.51	-1.15819	0.000399562	17.2469	-1.99862	2.28592e-15	26.6484	-1.6234	E3 ubiquitin- ligase HUWE1	0.9595	response to external stimulus response to stress protein modification by small protein conjugation or removal	GO:0008270;GO:0070737;GO:0070738;GO:0006284;GO:0000209;GO:0043774;GO:0043773;GO:0006513;GO:0008766;GO:0042787;GO:1903955;GO:0005654;GO:0044822;GO:0003677;GO:0004842;GO:0070062;GO:0005515;GO:0016021;GO:0030154;GO:0005829;GO:0018169;GO:0070740;GO:0016574;GO:0070736;GO:0098586;GO:0016567
CGI_10003167	-1.70649	5.67023e-12	22.0413	-1.91317	8.65445e-15	25.8039	-1.86738	1.53753e-14	24.7589	-1.82901	E3 ubiquitin- ligase HERC2	0.7035	response to external stimulus response to stress protein modification by small protein conjugation or removal	GO:0004842;GO:0008270;GO:0005515;GO:0007283;GO:0070735;GO:0006974;GO:0005743;GO:0016567;GO:0098586;GO:0016567
CGI_10012643	-3.75302	1.94158e-63	66.6135	-3.70127	1.28465e-40	73.5627	-2.83181	5.46107e-33	36.1236	-3.4287	RING-box 1 [Salmo salar]	0.999	response to external stimulus response to stress protein modification by small protein conjugation or removal	GO:0000717;GO:0000715;GO:0034450;GO:0006283;GO:0043224;GO:0061418;GO:0005654;GO:0000165;GO:0016032;GO:0005829;GO:0097602;GO:0016055;GO:0019788;GO:0032403;GO:0016874;GO:0008270;GO:0042769;GO:0006295;GO:0006296;GO:0000209;GO:0006293;GO:0006294;GO:0045116;GO:0006513;GO:0042787;GO:0090090;GO:0031625;GO:0030891;GO:0031464;GO:0031465;GO:0031146;GO:0031462;GO:0031463;GO:0070911;GO:0031466;GO:0031467
CGI_10028723	-1.08194	2.72509e-16	99.7862	-1.05376	1.39836e-18	102.087	-0.854671	3.46013e-11	91.2593	-0.996791	Vacuolar sorting-associated 4B	0.6965	response to external stimulusubiquitin-dependent protein catabolic process via the multivesicular body sorting pathway	GO:0090611;GO:1903542;GO:0008022;GO:1903543;GO:0060548;GO:1903724;GO:0005524;GO:0070062;GO:0033993;GO:0010971;GO:0042803;GO:0090543;GO:1901673;GO:1902188;GO:0000922;GO:0051261;GO:0000920;GO:0006997;GO:0042623;GO:0005634;GO:0005813;GO:0019076;GO:0043162;GO:0032510;GO:0010008;GO:0039702;GO:0007080
CGI_10004826	4.49628	0	5455.51	2.37062	5.7758e-13	6252.35	4.0914	5.43145e-296	5642.79	3.65277	CD109 antigen-like	0.665	defense response to other organism ; response to external stimulus ; defense response ; response to stress	GO:0005615;GO:0004866;GO:0016021;GO:0010951;GO:0006952;GO:0042742;GO:0008228
CGI_10022875	3.26226	8.49785e-31	62.9054	0.810761	0.000795412	94.1902	3.13148	3.96849e-28	64.8511	2.4015	heavy metal-binding HIP-like	0.815	defense response to other organism ; response to external stimulus ; defense response ; response to stress	GO:0005581;GO:0016021;GO:0006952;GO:0042742
CGI_10012888	2.60882	7.29805e-40	91.3732	0.923897	2.31597e-05	124.864	3.44329	4.76017e-50	87.4005	2.32534	Complement C1q 4	0.6615	defense response to other organism ; response to external stimulus ; defense response ; response to stress	GO:0046983;GO:0006952;GO:0042742
CGI_10017365	2.45415	4.31404e-68	186.638	0.65063	0.000535862	268.907	3.27108	3.48854e-95	177.79	2.12529	Complement C1q tumor necrosis factor-related 3	0.837	defense response to other organism ; response to external stimulus ; defense response ; response to stress	GO:0016021;GO:0006952;GO:0042742
CGI_10005427	1.3323	4.2894e-23	113.397	3.23459	3.64484e-83	93.2813	1.61649	1.19011e-33	109.947	2.06113	complement C1q 2	0.6555	defense response to other organism ; response to external stimulus ; defense response ; response to stress	GO:0006952;GO:0042742
CGI_10004828	2.97889	7.29805e-40	1239.93	0.812726	0.0186478	1773.99	2.1246	1.61321e-23	1379.73	1.97207	von Willebrand factor D and EGF domain-containing -like	0.646	defense response to other organism ; response to external stimulus ; defense response ; response to stress	GO:0006952;GO:0042742;GO:000222GO:0008228;GO:0050776
CGI_10022880	0.743982	0.00652472	43.0132	3.89864	1.19293e-29	29.5414	1.08109	0.000575045	40.0746	1.9079	SAMHD1-deoxynucleoside triphosphate triphosphohydrolase	0.811	defense response to other organism ; response to external stimulus ; defense response ; response to stress	GO:0008270;GO:0003723;GO:0051289;GO:0045088;GO:0051607;GO:0046061;GO:0005886;GO:0008832;GO:0005654;GO:0032567;GO:0006203;GO:0006952;GO:0051607;GO:0039528;GO:0098586;GO:0050776
CGI_10024034	2.43265	5.26584e-38	629.676	1.12483	2.77417e-10	808.792	1.95771	7.56443e-41	684.972	1.8384	complement C1q tumor necrosis factor-related 3-like	0.7385	defense response to other organism ; response to external stimulus ; defense response ; response to stress	GO:0005581;GO:0016021;GO:0006952;GO:0042742
CGI_10022927	1.81217	0.000155041	2.75186	2.19811	6.68513e-06	2.69007	1.35426	0.00556209	3.23331	1.78818	zinc finger CCCH domain-containing 11A-like	0.687	defense response to other organism ; response to external stimulus ; defense response ; response to stress	GO:0006952;GO:0051607;GO:0039528;GO:0098586;GO:0050776
CGI_10023473	0.70694	0.000292162	238.435	1.26954	1.04663e-11	217.133	2.98868	4.89313e-77	170.083	1.65505	Complement C1q 4	0.801	defense response to other organism ; response to external stimulus ; defense response ; response to stress	GO:0006952;GO:0042742
CGI_10015347	1.8342	2.31008e-08	11.6434	2.43501	1.27967e-11	11.1941	0.681437	0.0279589	15.5131	1.65022	Complement C1q tumor necrosis factor-related 3	0.695	defense response to other organism ; response to external stimulus ; defense response ; response to stress	GO:0006952;GO:0042742
CGI_10018405	1.94835	1.40683e-33	558.973	0.764586	1.65548e-08	738.011	2.06104	3.71998e-51	563.298	1.59133	D-galactoside-specific lectin	0.6995	defense response to other organism ; response to external stimulus ; defense response ; response to stress	GO:0016021;GO:0030246;GO:0006952;GO:0042742
CGI_10011385	1.73808	5.41704e-20	900.243	1.26629	1.6525e-17	1027.21	1.47064	1.96935e-22	967.391	1.49167	complement C1q 4	0.766	defense response to other organism ; response to external stimulus ; defense response ; response to stress	GO:0006952;GO:0042742
CGI_10023643	1.17716	0.0169923	4.10833	1.84516	0.000183317	3.66072	1.03359	0.0435503	4.39583	1.35197	Lectin AAEL000556-PA [Aedes aegypti]	0.586	defense response to other organism ; response to external stimulus ; defense response ; response to stress	GO:0006952;GO:0042742;GO:000222GO:0008228;GO:0050776
CGI_10011670	0.833849	1.29884e-23	712.119	0.226978	0.0266244	881.605	2.96361	6.70139e-68	521.606	1.34148	perlucin-like isoform X1	0.6535	defense response to other organism ; response to external stimulus ; defense response ; response to stress	GO:0006952;GO:0042742;GO:000222GO:0008228;GO:0050776
CGI_10001514	0.816818	1.70716e-10	96.8951	1.26652	3.87492e-16	90.683	1.93097	1.14559e-35	79.3333	1.3381	Complement C1q 3	0.8005	defense response to other organism ; response to external stimulus ; defense response ; response to stress	GO:0005634;GO:0005524;GO:0006281;GO:0005581;GO:0007049;GO:0006952;GO:0042742
CGI_10018364	1.44459	6.2757e-11	124.709	0.825887	0.000178464	149.387	1.47609	4.19219e-13	126.939	1.24886	perlucin	0.84	defense response to other organism ; response to external stimulus ; defense response ; response to stress	GO:0016021;GO:0030246;GO:0006952;GO:0042742;GO:000222GO:0008228;GO:0050776
CGI_10002102	0.441022	0.00756713	767.288	1.62185	1.62544e-21	605.261	1.6296	2.91975e-25	593.661	1.23083	complement C1q tumor necrosis factor-related 3-like	0.764	defense response to other organism ; response to external stimulus ; defense response ; response to stress	GO:0005581;GO:0006952;GO:0042742
CGI_10022591	1.32424	3.28543e-09	291.629	0.944001	1.15954e-18	334.35	0.904847	2.2356e-12	330.475	1.0577	complement C1q tumor necrosis factor-related 3-like	0.785	defense response to other organism ; response to external stimulus ; defense response ; response to stress	GO:0008061;GO:0016020;GO:0006030;GO:0005576;GO:0006952;GO:0042742
CGI_10005300	0.878406	0.000297439	23.5981	1.43913	5.04929e-08	21.5234	0.558698	0.0384686	26.3279	0.958746	Neuronal calcium sensor 2	0.782	defense response to other organism ; response to external stimulus ; defense response ; response to stress	GO:0007165;GO:0005739;GO:0051607;GO:0004871
CGI_10003957	0.65335	4.10771e-05	368.824	0.966427	1.45684e-13	354.935	1.22872	9.58031e-17	327.563	0.949498	Complement C1q tumor necrosis factor-related 3	0.856	defense response to other organism ; response to external stimulus ; defense response ; response to stress	GO:0016021;GO:0006952;GO:0042742
CGI_10018609	1.60102	1.75164e-12	74.5612	0.533061	0.00869611	100.153	0.594587	0.00151384	96.474	0.909557	perlucin [Crassostrea gigas]	0.6855	defense response to other organism ; response to external stimulus ; defense response ; response to stress	GO:0016491;GO:0046872;GO:0055114;GO:0030246;GO:0006952;GO:0042742;GO:000222GO:0008228;GO:0050776
CGI_10023843	1.26072	4.65234e-34	431.426	0.625779	0.00374339	519.631	0.828987	7.33746e-05	482.188	0.905162	cerebellin-3-like isoform X4 [Crassostrea gigas]	0.6365	defense response to other organism ; response to external stimulus ; defense response ; response to stress	GO:0006952;GO:0042742
CGI_10011387	0.888218	1.46297e-07	1717.28	0.777121	0.000602803	1830.47	0.980953	3.94823e-16	1719.94	0.882097	Complement C1q 4	0.806	defense response to other organism ; response to external stimulus ; defense response ; response to stress	GO:0006952;GO:0042742
CGI_10020715	0.633805	7.61295e-06	76.0776	0.544538	5.11768e-05	81.3264	1.43771	1.70426e-19	64.3053	0.872016	Heavy metal-binding HIP	0.6545	defense response to other organism ; response to external stimulus ; defense response ; response to stress	GO:0006952;GO:0042742
CGI_10005274	1.50968	3.82481e-26	322.547	0.469127	0.00128468	429.652	0.628638	3.16301e-06	402.392	0.869149	Lectin	0.688	defense response to other organism ; response to external stimulus ; defense response ; response to stress	GO:0006952;GO:0042742;GO:000222GO:0008228;GO:0050776
CGI_10024071	0.705474	1.26219e-06	186.128	1.02041	8.54595e-12	179.155	0.853013	4.52161e-13	183.416	0.859633	interferon-induced 44-like [Crassostrea gigas]	0.768	defense response to other organism ; response to external stimulus ; defense response ; response to stress	GO:0005525;GO:0006952;GO:0051607;GO:0039528;GO:0098586;GO:0050776
CGI_10010999	0.945655	7.68126e-16	183.199	0.523236	4.51887e-07	213.476	1.07224	1.00752e-10	181.043	0.847043	Complement C1q 2	0.6825	defense response to other organism ; response to external stimulus ; defense response ; response to stress	GO:0006952;GO:0042742
CGI_10002674	0.93189	9.30404e-09	2181.52	0.704955	1.26551e-06	2409.23	0.774571	5.36191e-09	2320.8	0.803805	complement C1q tumor necrosis factor-related 4-like [Crassostrea gigas]	0.72	defense response to other organism ; response to external stimulus ; defense response ; response to stress	GO:0006952;GO:0042742
CGI_10027187	1.22748	2.08449e-09	216.058	0.741893	1.02116e-07	254.105	0.359144	0.0168016	278.166	0.776173	N-acetylmuramoyl-L-alanine amidase	0.73	defense response to other organism ; response to external stimulus ; defense response ; response to stress	GO:0008270;GO:0009253;GO:0006952;GO:0008745;GO:0002376;GO:0006952;GO:0042742;GO:0061057;GO:0050776
CGI_10028278	1.34823	2.37518e-18	241.891	0.42305	0.0243963	316.807	0.495592	0.000884096	304.36	0.755625	Complement C1q 4	0.6505	defense response to other organism ; response to external stimulus ; defense response ; response to stress	GO:0006952;GO:0042742
CGI_10006548	0.882858	2.13876e-15	346.508	0.709737	1.5309e-09	376.874	0.453059	0.000143314	396.858	0.681885	complement C1q 2	0.593	defense response to other organism ; response to external stimulus ; defense response ; response to stress	GO:0048523;GO:0006952;GO:0042742
CGI_10011184	0.377591	0.0128825	356.678	0.670806	1.36079e-19	342.043	0.994131	6.4172e-09	307.143	0.680843	Interferon-induced 44	0.6665	defense response to other organism ; response to external stimulus ; defense response ; response to stress	GO:0006952;GO:0051607;GO:0039528;GO:0098586;GO:0050776
CGI_10021419	0.526851	3.13385e-06	1335	0.687758	5.27139e-13	1329.71	0.649285	9.77669e-10	1316.82	0.621298	bactericidal permeability increasing	0.6495	defense response to other organism ; response to external stimulus ; defense response ; response to stress	GO:0006952;GO:0042742
CGI_10025581	0.332581	0.0496833	1262.15	1.10932	4.6978e-18	1069.59	0.401985	0.00724591	1261.57	0.614629	collagen alpha-2(VIII) chain-like	0.701	defense response to other organism ; response to external stimulus ; defense response ; response to stress	GO:0006952;GO:0042742
CGI_10001869	0.300546	0.0187627	539.045	0.812506	3.44725e-10	484.684	0.576638	5.52275e-07	506.799	0.56323	interferon-induced 44-like	0.7475	defense response to other organism ; response to external stimulus ; defense response ; response to stress	GO:0005525;GO:0006952;GO:0051607;GO:0039528;GO:0098586;GO:0050776
CGI_10011669	0.413532	0.00177119	577.947	0.551184	0.00110825	576.991	0.44583	9.66019e-05	584.723	0.470182	perlucin-like	0.642	defense response to other organism ; response to external stimulus ; defense response ; response to stress	GO:0006952;GO:0042742;GO:000222GO:0008228;GO:0050776
CGI_10028882	0.453271	0.000339849	190.813	0.362703	0.00337438	203.808	0.242249	0.0373437	207.878	0.352741	metalloendopeptidase mitochondrial-like [Aplysia californica]	0.659	defense response to other organism ; response to external stimulus ; defense response ; response to stress	GO:0006508;GO:0016021;GO:0004222;GO:0006952;GO:0042742
CGI_10023695	0.20374	0.0179133	1543.77	0.294047	0.000235587	1561.17	0.428721	6.86362e-07	1469.05	0.308836	cysteine- acidic integral membrane -like	0.6905	defense response to other organism ; response to external stimulus ; defense response ; response to stress	GO:0006952;GO:0042742;GO:000222GO:0008228;GO:0050776
CGI_10009281	-0.278273	0.00461631	864.583	-0.234782	0.00478166	884.76	-0.309126	0.000118322	892.375	-0.27406	integrin beta-PS-like	0.7615	defense response to other organism ; response to external stimulus ; defense response ; response to stress	GO:0007229;GO:0016021;GO:0006355;GO:0007155;GO:0006952;GO:0051607;GO:0097696;GO:0098586;GO:0050776
CGI_10022970	-0.477109	4.03965e-09	2264.64	-0.31063	0.00013438	2205.81	-0.174108	0.0476043	2054.17	-0.320616	STING-stimulator of interferon genes -like isoform X3 [Crassostrea gigas]	0.5325	defense response to other organism ; response to external stimulus ; defense response ; response to stress	GO:0002218;GO:0007165;GO:0032481;GO:0006952;GO:0051607;GO:0039528;GO:0098586;GO:0050776
CGI_10012778	-0.448258	0.000618298	466.946	-0.229329	0.023119	445.582	-0.329339	0.000106036	453.819	-0.335642	C-type mannose receptor 2	0.6355	defense response to other organism ; response to external stimulus ; defense response ; response to stress	GO:0006952;GO:0042742;GO:000222GO:0008228;GO:0050776
CGI_10022000	-0.648026	3.16495e-23	928.268	-0.242298	0.00233706	820.965	-0.217746	0.0118706	797.317	-0.369357	probable ATP-dependent RNA helicase YTHDC2	0.739	defense response to other organism ; response to external stimulus ; defense response ; response to stress	GO:0070063;GO:0005634;GO:0005524;GO:1990247;GO:0044829;GO:0070555;GO:0005783;GO:0006396;GO:0004004;GO:0044822;GO:0034612;GO:0006952;GO:0051607;GO:0039528;GO:0098586;GO:0050776
CGI_10020809	-0.555336	2.13065e-18	1019.32	-0.36103	3.10793e-08	980.505	-0.257102	0.00609599	924.076	-0.391156	complement C1q 4	0.6035	defense response to other organism ; response to external stimulus ; defense response ; response to stress	GO:0006952;GO:0042742
CGI_10014037	-0.393519	0.000199669	1696.24	-0.42697	3.97241e-05	1788.97	-0.395459	0.0012747	1733.61	-0.405316	venom factor-like isoform X1 [Lingula anatina]	0.5365	defense response to other organism ; response to external stimulus ; defense response ; response to stress	GO:0005615;GO:0004866;GO:0010951;GO:0006952;GO:0042742
CGI_10005862	-0.634471	1.63821e-09	350.856	-0.435526	2.44457e-05	335.801	-0.236663	0.0140479	304.406	-0.435554	monocarboxylate transporter 13-like [Crassostrea gigas]	0.708	defense response to other organism ; response to external stimulus ; defense response ; response to stress	GO:0004930;GO:0007186;GO:0016021;GO:0006952;GO:0042742;GO:000222GO:0008228;GO:0050776
CGI_10020508	-0.459325	0.00478591	117.064	-0.351432	0.0302059	116.447	-0.734791	1.42025e-06	134.344	-0.515183	Lectin	0.962	defense response to other organism ; response to external stimulus ; defense response ; response to stress	GO:0006952;GO:0042742;GO:000222GO:0008228;GO:0050776
CGI_10015859	-0.571148	2.97364e-06	150.588	-0.728458	2.29256e-10	167.553	-0.387494	0.00281033	142.558	-0.562367	sodium-coupled neutral amino acid transporter 11	0.7605	defense response to other organism ; response to external stimulus ; defense response ; response to stress	GO:0016021;GO:0005783;GO:0015171;GO:0003333;GO:0006952;GO:0042742
CGI_10004177	-0.640812	2.28801e-05	348.695	-0.472535	0.00712669	337.926	-0.581505	2.90369e-05	346.116	-0.564951	complement C1q 2 [Crassostrea gigas]	0.617	defense response to other organism ; response to external stimulus ; defense response ; response to stress	GO:0008270;GO:0005622;GO:0006952;GO:0042742
CGI_10006439	-0.775048	5.01315e-10	602.596	-0.437231	0.000539639	542.73	-0.515943	2.31625e-05	549.707	-0.576074	STING-stimulator of interferon genes -like isoform X3 [Crassostrea gigas]	0.5495	defense response to other organism ; response to external stimulus ; defense response ; response to stress	GO:0002218;GO:0007165;GO:0032481;GO:0006952;GO:0051607;GO:0039528;GO:0098586;GO:0050776
CGI_10010505	-0.861217	6.20353e-09	1200.9	-0.502586	0.000878645	1066.08	-0.63155	7.56643e-08	1101.92	-0.665118	galactose-specific lectin nattectin-like [Poecilia reticulata]	0.5555	defense response to other organism ; response to external stimulus ; defense response ; response to stress	GO:0016020;GO:0006952;GO:0042742;GO:000222GO:0008228;GO:0050776
CGI_10019317	-0.823031	1.315e-06	48.038	-0.822437	3.20272e-07	49.9978	-0.407739	0.0453072	40.9066	-0.684403	CUB and sushi domain-containing 3-like	0.661	defense response to other organism ; response to external stimulus ; defense response ; response to stress	GO:0016021;GO:0006952;GO:0042742;GO:000222GO:0008228;GO:0050776
CGI_10023012	-0.727836	7.72994e-06	239.155	-0.863023	3.54428e-12	263.335	-0.565407	0.00711061	228.117	-0.718755	complement C1q 4	0.7245	defense response to other organism ; response to external stimulus ; defense response ; response to stress	GO:0006952;GO:0042742
CGI_10016989	-1.04067	4.75768e-11	210.441	-0.340651	0.0448902	160.641	-0.850729	1.30007e-06	196.751	-0.744018	Interferon-induced helicase C domain-containing 1	0.54	defense response to other organism ; response to external stimulus ; defense response ; response to stress	GO:0097159;GO:1901363;GO:0008152;GO:0004386;GO:0006952;GO:0051607;GO:0039528;GO:0098586;GO:0050776
CGI_10004798	-0.761067	3.21233e-08	121.986	-0.379762	0.00309237	107.603	-1.09126	1.00124e-16	144.826	-0.744029	membrane-attack complex perforin domain-containing [Eimeria acervulina]	0.6095	defense response to other organism ; response to external stimulus ; defense response ; response to stress	GO:0006952;GO:0042742
CGI_10016348	-0.738679	3.08334e-09	123.761	-0.914905	1.2576e-16	139.125	-1.14235	6.10274e-29	151.749	-0.931978	Complement C1q 2	0.7945	defense response to other organism ; response to external stimulus ; defense response ; response to stress	GO:0006952;GO:0042742
CGI_10024123	-0.8654	2.36962e-06	421.544	-1.29093	1.64068e-22	534.671	-0.66836	7.95611e-05	391.721	-0.941565	C3 and PZP-like alpha-2-macroglobulin domain-containing 8	0.5945	defense response to other organism ; response to external stimulus ; defense response ; response to stress	GO:0006952;GO:0042742;GO:000222GO:0008228;GO:0050776
CGI_10014905	-0.855754	6.2908e-06	69.6869	-1.26595	1.94139e-08	89.7428	-1.00925	0.000107897	77.7898	-1.04365	perlucin [Crassostrea gigas]	0.632	defense response to other organism ; response to external stimulus ; defense response ; response to stress	GO:0006952;GO:0042742;GO:000222GO:0008228;GO:0050776
CGI_10028107	-0.90803	2.93939e-07	113.753	-1.40808	3.09021e-20	150.991	-1.02573	5.51424e-08	122.723	-1.11395	Heavy metal-binding HIP	0.7355	defense response to other organism ; response to external stimulus ; defense response ; response to stress	GO:0006952;GO:0042742
CGI_10013361	-1.78589	1.63912e-16	92.9439	-0.896188	2.76833e-07	59.2678	-0.718942	0.000293304	53.5962	-1.13367	Complement C1q 2	0.755	defense response to other organism ; response to external stimulus ; defense response ; response to stress	GO:0006952;GO:0042742
CGI_10018638	-1.36702	1.56047e-29	192.418	-1.25567	4.35337e-22	189.573	-0.808279	7.37394e-08	150.569	-1.14365	methionine--tRNA mitochondrial-like	0.719	defense response to other organism ; response to external stimulus ; defense response ; response to stress	GO:0005524;GO:0004825;GO:0006431;GO:0044444;GO:0006952;GO:0042742
CGI_10020742	-1.76216	1.43795e-13	56.4961	-0.649857	0.00279155	32.2974	-1.05946	8.52309e-08	38.3215	-1.15716	VWFA and cache domain-containing 1	0.59	defense response to other organism ; response to external stimulus ; defense response ; response to stress	GO:0016021;GO:0006952;GO:0042742;GO:000222GO:0008228;GO:0050776
CGI_10002246	-1.00889	3.77178e-06	44.4867	-0.833578	0.0010626	42.5593	-1.98512	9.72115e-12	83.1004	-1.27586	[Nematostella vectensis]	0.7345	defense response to other organism ; response to external stimulus ; defense response ; response to stress	GO:0005975;GO:0004563;GO:0030247;GO:0006952;GO:0042742;GO:000222GO:0008228;GO:0050776
CGI_10011027	-1.18856	0.00344835	5.96056	-1.40666	0.000392049	7.01378	-1.237	0.00509252	6.58797	-1.27741	Lectin AAEL006456-PA [Aedes aegypti]	0.5875	defense response to other organism ; response to external stimulus ; defense response ; response to stress	GO:0005488;GO:0006952;GO:0042742;GO:000222GO:0008228;GO:0050776
CGI_10026716	-2.22933	1.77481e-19	72.4703	-0.65788	0.00677785	30.9558	-1.42158	3.84357e-10	44.5578	-1.43627	Complement C1q 4	0.6485	defense response to other organism ; response to external stimulus ; defense response ; response to stress	GO:0006952;GO:0042742
CGI_10007386	-1.1425	1.44219e-05	32.3874	-1.32182	5.91482e-09	36.3778	-1.89365	2.42399e-17	49.3232	-1.45266	perlucin 5	0.6155	defense response to other organism ; response to external stimulus ; defense response ; response to stress	GO:0006952;GO:0042742;GO:000222GO:0008228;GO:0050776
CGI_10027615	-0.889373	0.0276955	6.93597	-0.82075	0.0437295	6.81767	-2.67528	1.0561e-17	21.4213	-1.4618	metallo ase inhibitor 3-like isoform X1 [Crassostrea gigas]	0.808	defense response to other organism ; response to external stimulus ; defense response ; response to stress	GO:0016021;GO:0010951;GO:0008191;GO:0006952;GO:0042742
CGI_10024457	-1.65226	0.000117256	33.0709	-1.76857	1.56596e-06	31.6086	-1.40454	0.00125306	26.8022	-1.60846	lysozyme	0.804	defense response to other organism ; response to external stimulus ; defense response ; response to stress	GO:0019835;GO:0008152;GO:0005576;GO:0042742;GO:0003796;GO:0006952;GO:0042742
CGI_10014140	-1.33478	0.000110137	56.3465	-2.01977	6.23134e-09	92.3855	-1.56227	8.97196e-06	66.445	-1.63894	hemagglutinin amebocyte aggregation factor-like	0.7905	defense response to other organism ; response to external stimulus ; defense response ; response to stress	GO:0003824;GO:0008152;GO:0006952;GO:0042742
CGI_10012132	-1.05034	0.003726	8.1505	-0.970973	0.0106532	8.1275	-3.09532	8.78462e-29	29.8868	-1.70555	hypothetical protein CGI_10012132	0.7056	defense response to other organism ; response to external stimulus ; defense response ; response to stress	GO:0016021;GO:0006952;GO:0042742;GO:000222GO:0008228;GO:0050776
CGI_10023840	-2.0607	5.70413e-23	32.9194	-0.96691	0.000124268	18.8167	-2.20132	2.18664e-18	37.888	-1.74298	low affinity immunoglobulin epsilon Fc receptor-like isoform X2	0.6135	defense response to other organism ; response to external stimulus ; defense response ; response to stress	GO:0006952;GO:0042742;GO:000222GO:0008228;GO:0050776
CGI_10025155	-1.38834	0.00287647	4.01254	-2.38529	3.69596e-08	9.46345	-1.55904	0.000565812	4.3485	-1.77756	Lectin	0.637	defense response to other organism ; response to external stimulus ; defense response ; response to stress	GO:0006952;GO:0042742;GO:000222GO:0008228;GO:0050776
CGI_10009270	-0.650474	0.037284	22.6797	-2.73907	1.84747e-40	74.8117	-2.00131	1.90902e-15	48.0528	-1.79695	Multimerin-2 [Crassostrea gigas]	0.7095	defense response to other organism ; response to external stimulus ; defense response ; response to stress	GO:0006952;GO:0042742
CGI_10018642	-2.13605	1.72345e-31	75.229	-2.40299	4.56554e-52	90.3987	-1.44982	2.87958e-14	51.9485	-1.99629	complement C1q 3	0.7805	defense response to other organism ; response to external stimulus ; defense response ; response to stress	GO:0005524;GO:0004825;GO:0005737;GO:0016021;GO:0006431;GO:0006952;GO:0042742
CGI_10002101	-1.42405	6.4064e-05	13.6849	-1.7638	9.33069e-07	17.7283	-2.90437	2.42683e-18	38.7437	-2.03074	complement C1q tumor necrosis factor-related 3-like	0.7745	defense response to other organism ; response to external stimulus ; defense response ; response to stress	GO:0005581;GO:0006952;GO:0042742
CGI_10001435	-2.94078	1.13527e-21	43.0868	-1.57774	3.33024e-05	18.6021	-1.59132	4.72997e-05	18.7994	-2.03662	complement C1q 4	0.7456	defense response to other organism ; response to external stimulus ; defense response ; response to stress	GO:0006952;GO:0042742
CGI_10008908	-2.09637	9.13152e-15	26.7479	-1.5547	6.67704e-09	19.6317	-2.92076	8.8335e-37	44.6124	-2.19061	complement C1q tumor necrosis factor-related 4-like [Crassostrea gigas]	0.7125	defense response to other organism ; response to external stimulus ; defense response ; response to stress	GO:0006952;GO:0042742
CGI_10010262	-2.37445	1.24592e-10	14.0282	-3.34586	2.63163e-21	29.8217	-1.02778	0.025763	5.71793	-2.24936	Complement C1q 4	0.8325	defense response to other organism ; response to external stimulus ; defense response ; response to stress	GO:0006952;GO:0042742
CGI_10024455	-2.25223	1.00867e-07	35.7609	-2.5509	3.16376e-18	29.8485	-2.30385	4.0194e-09	31.154	-2.36899	Lysozyme	0.747	defense response to other organism ; response to external stimulus ; defense response ; response to stress	GO:0019835;GO:0050829;GO:0008152;GO:0005576;GO:0050830;GO:0003796;GO:0006952;GO:0042742
CGI_10015044	-2.67648	1.34034e-140	3108.38	-2.24931	1.73866e-23	2679.99	-2.70793	7.41745e-172	3216.37	-2.54457	heavy metal-binding HIP-like isoform X2 [Crassostrea gigas]	0.6345	defense response to other organism ; response to external stimulus ; defense response ; response to stress	GO:0005581;GO:0016021;GO:0006952;GO:0042742
CGI_10002821	-2.39955	2.89853e-07	42.7715	-2.32774	1.62745e-06	41.058	-3.14137	9.37377e-12	66.4241	-2.62289	complement C1q 4 [Crassostrea gigas]	0.6225	defense response to other organism ; response to external stimulus ; defense response ; response to stress	GO:0006952;GO:0042742
CGI_10017436	-2.69071	2.13725e-09	6.9492	-3.28019	1.28627e-14	8.14152	-2.17487	7.11689e-06	5.26511	-2.71526	Complement C1q tumor necrosis factor-related 3	0.6945	defense response to other organism ; response to external stimulus ; defense response ; response to stress	GO:0006952;GO:0042742
CGI_10025046	-2.03331	7.43437e-09	12.7375	-4.80381	2.13561e-64	91.4029	-3.40772	8.62789e-27	33.8498	-3.41495	Caprin-2 [Crassostrea gigas]	0.684	defense response to other organism ; response to external stimulus ; defense response ; response to stress	GO:0006952;GO:0042742
CGI_10002936	-2.99551	6.31304e-15	10.6651	-4.36806	2.04818e-31	37.333	-3.45156	4.44682e-20	15.0664	-3.60504	Complement C1q 4	0.8871	defense response to other organism ; response to external stimulus ; defense response ; response to stress	GO:0006952;GO:0042742
CGI_10015725	-4.41067	1.74651e-29	48.9528	-2.97591	3.79541e-12	12.3004	-5.66405	2.69158e-58	97.5493	-4.35021	lysozyme 1-like	0.563	defense response to other organism ; response to external stimulus ; defense response ; response to stress	GO:0006952;GO:0042742
CGI_10023546	-5.61771	4.69219e-96	127.415	-4.53734	2.91995e-57	56.681	-3.59904	1.05881e-32	28.3959	-4.5847	C-type lectin domain family 10 member A-like	0.6735	defense response to other organism ; response to external stimulus ; defense response ; response to stress	GO:0016020;GO:0006952;GO:0042742;GO:000222GO:0008228;GO:0050776
CGI_10016426	0.953688	0.000332345	486.332	1.47338	6.23717e-09	453.367	1.17824	3.60887e-07	473.934	1.20177	neurotrypsin-like	0.618	defense response to other organism ; response to external stimulus ; defense response ; response to stressreceptor-mediated endocytosis	GO:0016020;GO:0005044;GO:0006898;GO:0016787;GO:0006952;GO:0042742
CGI_10018755	0.886476	5.68842e-06	165.329	1.12643	1.75305e-10	162.899	0.898771	1.46142e-09	168.9	0.970559	collagen alpha-3(VI) chain-like isoform X1	0.713	defense response to other organism ; response to external stimulus ; defense response ; response to stressreceptor-mediated endocytosis	GO:0005581;GO:0005509;GO:0016020;GO:0005044;GO:0006898;GO:0006952;GO:0042742
CGI_10018395	0.633043	0.00196448	44.302	0.750108	0.000159727	44.8188	0.753366	8.46273e-05	43.798	0.712172	Deleted in malignant brain tumors 1	0.7705	defense response to other organism ; response to external stimulus ; defense response ; response to stressreceptor-mediated endocytosis	GO:0016020;GO:0005044;GO:0006898;GO:0006952;GO:0042742
CGI_10001511	0.468748	0.0191907	865.494	0.732096	8.63494e-09	839.678	0.552468	0.00539935	862.17	0.584437	deleted in malignant brain tumors 1 -like	0.7235	defense response to other organism ; response to external stimulus ; defense response ; response to stressreceptor-mediated endocytosis	GO:0008061;GO:0006030;GO:0006508;GO:0016021;GO:0004252;GO:0005044;GO:0004386;GO:0005576;GO:0006898;GO:0006952;GO:0042742
CGI_10016401	0.335025	0.00814492	14816.8	0.779481	2.69156e-08	13575.8	0.588144	3.83303e-06	14029.6	0.56755	MAM and LDL-receptor class A domain-containing 2-like	0.4795	defense response to other organism ; response to external stimulus ; defense response ; response to stressreceptor-mediated endocytosis	GO:0016020;GO:0006508;GO:0004252;GO:0005044;GO:0006898;GO:0006952;GO:0042742
CGI_10018754	-0.45214	4.53746e-07	992.607	-0.243035	0.000799446	950.92	-0.358053	6.38183e-07	974.796	-0.351076	deleted in malignant brain tumors 1 -like	0.71	defense response to other organism ; response to external stimulus ; defense response ; response to stressreceptor-mediated endocytosis	GO:0016020;GO:0005044;GO:0006898;GO:0006952;GO:0042742
CGI_10021829	-0.401743	0.0375497	1134.5	-0.422436	0.0163193	1188.68	-0.687428	0.00152952	1313.26	-0.503869	deleted in malignant brain tumors 1 -like	0.6175	defense response to other organism ; response to external stimulus ; defense response ; response to stressreceptor-mediated endocytosis	GO:0016020;GO:0006508;GO:0004252;GO:0005044;GO:0006898;GO:0006952;GO:0042742;GO:000222GO:0008228;GO:0050776
CGI_10004025	-1.22156	6.70811e-13	263.927	-0.792297	5.8263e-06	222.907	-1.23077	6.78448e-10	272.661	-1.08154	deleted in malignant brain tumors 1 -like	0.5965	defense response to other organism ; response to external stimulus ; defense response ; response to stressreceptor-mediated endocytosis	GO:0016020;GO:0005044;GO:0006898;GO:0006952;GO:0042742
CGI_10022550	-1.87891	5.71313e-28	181.153	-0.713575	0.000640053	103.52	-1.56322	2.07293e-27	152.919	-1.38524	deleted in malignant brain tumors 1 -like	0.738	defense response to other organism ; response to external stimulus ; defense response ; response to stressreceptor-mediated endocytosis	GO:0016021;GO:0005044;GO:0006898;GO:0006952;GO:0042742
CGI_10000329	2.7167	4.81723e-30	215.747	0.374489	9.08474e-06	351.835	6.98258	2.18478e-113	195.3	3.35793	Down syndrome cell adhesion molecule 1 partial	0.7088	defense responseresponse to stress	GO:0016020;GO:0006470;GO:0006952
CGI_10009419	3.57249	7.85499e-19	11.1932	3.38138	1.37797e-17	11.8604	3.44607	4.51214e-18	11.605	3.46664	Tripartite motif-containing 2	0.7625	protein modification by small protein conjugation or removal	GO:0016567
CGI_10022830	1.4387	2.92926e-10	35.2439	3.81537	5.23477e-32	28.4182	2.62362	1.12935e-22	30.3427	2.6259	Tripartite motif-containing 3	0.734	protein modification by small protein conjugation or removal	GO:0016567
CGI_10009418	2.90561	4.37789e-25	37.1822	2.01843	9.00095e-11	42.2295	2.86501	6.88376e-26	38.3387	2.59635	tripartite motif-containing 55-like [Crassostrea gigas]	0.8195	protein modification by small protein conjugation or removal	GO:0008270;GO:0005622;GO:0016567
CGI_10012801	2.5423	3.67626e-08	4.11962	2.69737	1.15354e-08	4.29021	1.00885	0.0322059	5.79486	2.08284	Tripartite motif-containing 2	0.7135	protein modification by small protein conjugation or removal	GO:0016567
CGI_10010909	3.56876	9.04955e-31	27.0207	1.61165	2.33231e-12	34.8855	0.839151	0.0051921	39.9789	2.00652	Tripartite motif-containing 3	0.871	protein modification by small protein conjugation or removal	GO:0008270;GO:0005622;GO:0016567
CGI_10000558	2.20847	1.89129e-40	73.3397	2.42672	1.58717e-38	74.2261	0.94693	7.81979e-06	93.2862	1.8607	Tripartite motif-containing 3	0.6805	protein modification by small protein conjugation or removal	GO:0016567
CGI_10012013	2.63868	7.96283e-38	139.012	1.72057	1.38844e-22	163.148	1.12077	2.63661e-06	178.201	1.82667	Tripartite motif-containing 2	0.8175	protein modification by small protein conjugation or removal	GO:0008270;GO:0005622;GO:0016567
CGI_10005350	2.30795	5.76095e-07	3.38734	1.76738	0.000168742	3.91817	1.01059	0.0257297	4.68617	1.69531	tripartite motif-containing 2-like	0.8545	protein modification by small protein conjugation or removal	GO:0022891;GO:0055085;GO:0016021;GO:0016567
CGI_10003335	2.78504	2.97922e-35	44.2276	1.72307	2.5514e-18	52.6261	0.365971	0.0433575	71.1453	1.62469	Tripartite motif-containing 45 [Crassostrea gigas]	0.8645	protein modification by small protein conjugation or removal	GO:0005524;GO:0008270;GO:0005622;GO:0016567
CGI_10008266	1.52401	4.56257e-19	55.4878	2.22611	5.36963e-34	51.9079	0.819353	5.10935e-08	66.1688	1.52316	Tripartite motif-containing 3	0.906	protein modification by small protein conjugation or removal	GO:0008270;GO:0005622;GO:0016567
CGI_10028791	0.600549	0.0092534	55.4069	3.32424	2.88811e-38	37.9389	0.42265	0.0212817	59.9172	1.44915	Tripartite motif-containing 2	0.713	protein modification by small protein conjugation or removal	GO:0008270;GO:0005622;GO:0016567
CGI_10001417	1.17882	1.00625e-07	56.4809	1.24853	5.24914e-06	57.6101	1.78654	8.37453e-15	51.5531	1.40463	Tripartite motif-containing 2	0.751	protein modification by small protein conjugation or removal	GO:0016567
CGI_10004913	1.43035	2.26507e-15	53.5408	1.77706	8.28749e-21	52.41	0.958049	1.77955e-08	60.6045	1.38848	Tripartite motif-containing 3	0.7355	protein modification by small protein conjugation or removal	GO:0016567
CGI_10015676	2.00157	1.47394e-09	11.0121	1.29171	2.21446e-05	13.2219	0.810972	0.00803175	14.5238	1.36808	Tripartite motif-containing 2	0.7085	protein modification by small protein conjugation or removal	GO:0016567
CGI_10010200	0.473994	0.0422273	50.5696	1.8133	5.56671e-12	38.5861	1.8085	4.02978e-19	38.2984	1.36526	Tripartite motif-containing 2	0.798	protein modification by small protein conjugation or removal	GO:0008270;GO:0005622;GO:0016567
CGI_10020115	0.452482	0.0170602	103.054	1.00067	9.99275e-10	92.7906	2.6202	3.37721e-49	70.2518	1.35778	Tripartite motif-containing 2	0.777	protein modification by small protein conjugation or removal	GO:0016567
CGI_10001167	1.14592	0.00016881	23.638	1.48372	3.21829e-07	23.0737	0.998743	0.000360983	25.1504	1.20946	Tripartite motif-containing 3	0.8595	protein modification by small protein conjugation or removal	GO:0008270;GO:0071203;GO:0016567
CGI_10011066	0.79045	3.52026e-09	584.568	1.24058	1.30107e-22	548.241	1.346	3.7298e-19	525.069	1.12568	Tripartite motif-containing 2	0.519	protein modification by small protein conjugation or removal	GO:0016567
CGI_10019537	0.510722	1.01525e-07	430.232	1.27059	1.14764e-53	371.603	1.17152	6.92974e-42	372.152	0.984277	F-box LRR-repeat 4	0.7475	protein modification by small protein conjugation or removal	GO:0004842;GO:0008270;GO:0016021;GO:0016829;GO:0006520;GO:0016874;GO:0016567
CGI_10009237	0.616716	2.99685e-08	110.239	1.24373	9.48598e-22	98.6668	0.97597	1.40672e-14	102.649	0.945472	Tripartite motif-containing 2	0.8935	protein modification by small protein conjugation or removal	GO:0005524;GO:0008270;GO:0042626;GO:0055085;GO:0006508;GO:0016021;GO:0004222;GO:0005622;GO:0016567
CGI_10004345	1.17509	2.9616e-28	131.921	1.07532	6.58825e-18	140.112	0.568506	1.46046e-08	156.589	0.939638	Tripartite motif-containing 45	0.852	protein modification by small protein conjugation or removal	GO:0005524;GO:0008270;GO:0016491;GO:0055114;GO:0005622;GO:0016567
CGI_10026422	0.435446	0.00028833	1042.78	1.27722	4.44078e-30	879.721	1.04769	1.51193e-18	906.023	0.92012	tripartite motif-containing 55-like	0.8795	protein modification by small protein conjugation or removal	GO:0008270;GO:0005622;GO:0016567
CGI_10000087	1.19588	2.0524e-16	114.917	1.16715	3.37064e-18	120.503	0.348755	0.00264111	146.487	0.903926	Tripartite motif-containing 3	0.9145	protein modification by small protein conjugation or removal	GO:0008270;GO:0008152;GO:0016740;GO:0005622;GO:0016567
CGI_10026574	0.756258	8.73879e-06	84.7942	1.16071	7.28578e-10	79.9586	0.794531	8.77243e-05	85.6331	0.903832	Tripartite motif-containing 2	0.571	protein modification by small protein conjugation or removal	GO:0008270;GO:0005622;GO:0016567
CGI_10000805	0.695523	0.00233995	26.9488	1.06469	3.90117e-06	25.5508	0.942546	5.02236e-05	25.8486	0.90092	Tripartite motif-containing 2	0.6335	protein modification by small protein conjugation or removal	GO:0008270;GO:0005622;GO:0016567
CGI_10000229	0.910255	5.24204e-39	508.898	1.23042	1.34736e-60	492.959	0.412403	1.35524e-05	593.833	0.851025	Tripartite motif-containing 2	0.9055	protein modification by small protein conjugation or removal	GO:0008270;GO:0005622;GO:0016567
CGI_10002848	1.4199	1.98748e-26	88.2436	0.785136	7.35551e-12	106.198	0.326235	0.00861636	118.587	0.843758	Tripartite motif-containing 2	0.8495	protein modification by small protein conjugation or removal	GO:0008270;GO:0016020;GO:0005622;GO:0016567
CGI_10000688	0.556745	0.000590045	271.827	0.394782	0.0105291	297.122	1.57507	2.42812e-24	220.042	0.842197	Tripartite motif-containing 2	0.8015	protein modification by small protein conjugation or removal	GO:0008270;GO:0005622;GO:0016567
CGI_10000619	0.849338	1.56599e-16	179.175	0.631438	8.79701e-12	197.516	0.882202	4.75867e-17	181.397	0.78766	Tripartite motif-containing 2	0.91	protein modification by small protein conjugation or removal	GO:0003677;GO:0004820;GO:0005524;GO:0008270;GO:0006426;GO:0003713;GO:0005737;GO:0006355;GO:0016567
CGI_10015988	0.668462	0.00657923	25.3183	0.974452	2.72657e-05	24.3673	0.717411	0.00752933	25.3882	0.786775	Tripartite motif-containing 3	0.5495	protein modification by small protein conjugation or removal	GO:0016567
CGI_10011817	0.678331	4.02385e-07	138.754	1.2287	1.81243e-24	126.468	0.450421	3.49958e-05	151.197	0.785818	Tripartite motif-containing 2	0.8075	protein modification by small protein conjugation or removal	GO:0008270;GO:0005622;GO:0016567
CGI_10001185	0.371744	0.0163728	96.1282	0.583451	0.000111515	93.9815	1.38396	1.24909e-20	76.1904	0.779718	tripartite motif-containing 55-like [Crassostrea gigas]	0.7995	protein modification by small protein conjugation or removal	GO:0008270;GO:0005622;GO:0016567
CGI_10016199	0.415536	0.0186327	223.388	1.00454	2.18861e-16	199.066	0.889648	2.40508e-14	200.731	0.769907	Tripartite motif-containing 3	0.836	protein modification by small protein conjugation or removal	GO:0008270;GO:0005622;GO:0016567
CGI_10007284	0.80866	1.82904e-10	138.301	0.845177	1.47058e-10	142.422	0.62213	3.27135e-07	148.278	0.758655	Tripartite motif-containing 3	0.837	protein modification by small protein conjugation or removal	GO:0008270;GO:0005622;GO:0016567
CGI_10015669	1.09137	6.51189e-45	329.452	0.793179	6.39429e-15	367.773	0.366121	3.36461e-06	406.745	0.750223	Tripartite motif-containing 2	0.907	protein modification by small protein conjugation or removal	GO:0008270;GO:0005622;GO:0016567
CGI_10011020	1.06133	4.36971e-09	73.2322	0.424783	0.0164076	90.478	0.760373	4.02206e-05	80.6637	0.748828	apolipo L3-like	0.7871	protein modification by small protein conjugation or removal	GO:0004842;GO:0006869;GO:0008270;GO:0016021;GO:0008289;GO:0042157;GO:0005576;GO:0016567
CGI_10018146	0.724116	4.47227e-06	94.8775	0.533288	5.18375e-05	104.323	0.981641	6.85324e-12	90.7909	0.746348	Tripartite motif-containing 45	0.6225	protein modification by small protein conjugation or removal	GO:0008270;GO:0005622;GO:0016567
CGI_10002675	0.407465	0.000432809	216.447	0.485342	4.54321e-05	220.162	1.30034	9.72828e-24	176.501	0.731049	Tripartite motif-containing 45	0.7565	protein modification by small protein conjugation or removal	GO:0000166;GO:0008270;GO:0005622;GO:0016567
CGI_10015972	0.568359	0.0112405	37.3496	0.846917	0.000968673	35.9322	0.744093	0.000436356	36.357	0.719789	Tripartite motif-containing 2	0.8895	protein modification by small protein conjugation or removal	GO:0008270;GO:0071203;GO:0016567
CGI_10028137	0.537351	6.7003e-05	111.268	0.704803	1.61776e-07	110.786	0.909423	2.56923e-09	102.966	0.717192	Tripartite motif-containing 2	0.764	protein modification by small protein conjugation or removal	GO:0008270;GO:0005622;GO:0016567
CGI_10007681	0.489479	8.10693e-08	504.718	0.987144	4.11495e-28	461.089	0.673497	5.59107e-13	489.426	0.716707	Tripartite motif-containing 2	0.846	protein modification by small protein conjugation or removal	GO:0003677;GO:0004820;GO:0005524;GO:0008270;GO:0006426;GO:0003713;GO:0005737;GO:0006355;GO:0016567
CGI_10017352	0.692223	0.00600013	469.216	0.62753	0.0123466	498.093	0.776473	0.00188217	468.536	0.698742	Tripartite motif-containing 2	0.599	protein modification by small protein conjugation or removal	GO:0016567
CGI_10000350	0.781987	3.95257e-13	226.054	0.895864	3.13619e-13	228.606	0.334949	0.000584359	262.011	0.670934	Tripartite motif-containing 2	0.907	protein modification by small protein conjugation or removal	GO:0008270;GO:0005622;GO:0016567
CGI_10018145	0.601562	3.65868e-06	163.297	0.876346	1.28893e-14	158.207	0.473246	7.60126e-05	173.075	0.650385	Tripartite motif-containing 45	0.6185	protein modification by small protein conjugation or removal	GO:0008270;GO:0005622;GO:0016567
CGI_10009382	0.540072	0.000564474	180.898	1.0242	4.96986e-17	166.537	0.375476	0.00203041	194.278	0.646583	Tripartite motif-containing 3	0.906	protein modification by small protein conjugation or removal	GO:0008270;GO:0008152;GO:0016740;GO:0005622;GO:0016567
CGI_10009607	0.80404	5.54991e-10	90.1304	0.457968	0.000697681	103.138	0.675979	3.46888e-08	95.1873	0.645996	Tripartite motif-containing 2	0.8945	protein modification by small protein conjugation or removal	GO:0008270;GO:0005622;GO:0016567
CGI_10024285	0.488636	0.0290143	2751.36	0.620712	0.000142742	2766.43	0.752582	1.16107e-05	2615.66	0.620643	ariadne-1 [Crassostrea gigas]	0.4885	protein modification by small protein conjugation or removal	GO:0004842;GO:0008270;GO:0016567
CGI_10020024	0.586855	1.06186e-05	115.96	0.587352	0.00759963	120.244	0.668803	4.64496e-06	115.841	0.614337	Tripartite motif-containing 3	0.91	protein modification by small protein conjugation or removal	GO:0008270;GO:0008152;GO:0016740;GO:0005622;GO:0016567
CGI_10019905	0.597083	9.73568e-06	154.971	0.802858	3.83005e-16	153.031	0.417253	5.86003e-05	166.704	0.605731	Tripartite motif-containing 2	0.613	protein modification by small protein conjugation or removal	GO:0008270;GO:0005622;GO:0016567
CGI_10007414	1.09065	5.46841e-20	194.763	0.279395	0.0386985	252.414	0.407775	0.00139168	237.912	0.592607	Tripartite motif-containing 2	0.877	protein modification by small protein conjugation or removal	GO:0008270;GO:0005622;GO:0016567
CGI_10022650	0.368315	0.0030472	108.19	0.537	0.000203555	107.126	0.722376	2.76452e-08	99.7645	0.542563	Tripartite motif-containing 2	0.899	protein modification by small protein conjugation or removal	GO:0008270;GO:0005622;GO:0016567
CGI_10020823	0.687738	2.58242e-11	265.125	0.689134	2.25391e-07	275.34	0.213024	0.0234212	311.679	0.529966	Tripartite motif-containing 45	0.86	protein modification by small protein conjugation or removal	GO:0005524;GO:0008270;GO:0016491;GO:0055114;GO:0005622;GO:0016567
CGI_10023411	0.473847	1.62895e-11	337.981	0.397587	7.02377e-09	359.615	0.647169	7.2569e-17	328.27	0.506201	Tripartite motif-containing 2	0.8465	protein modification by small protein conjugation or removal	GO:0003677;GO:0004820;GO:0005524;GO:0008270;GO:0006426;GO:0003713;GO:0005737;GO:0006355;GO:0016567
CGI_10006169	0.518373	0.00288415	58.6427	0.486681	0.00895227	61.6047	0.487612	0.00537152	60.3464	0.497555	Tripartite motif-containing 2	0.743	protein modification by small protein conjugation or removal	GO:0008270;GO:0005622;GO:0016567
CGI_10011277	0.518832	1.22913e-05	405.316	0.613685	1.54781e-10	411.143	0.257522	0.00284266	448.343	0.463346	Tripartite motif-containing 2 [Crassostrea gigas]	0.9045	protein modification by small protein conjugation or removal	GO:0008270;GO:0071203;GO:0016567
CGI_10023517	0.240177	0.0110128	544.706	0.470988	2.27031e-07	528.194	0.528928	2.77305e-09	509.351	0.413364	Tripartite motif-containing 2	0.8985	protein modification by small protein conjugation or removal	GO:0008270;GO:0006508;GO:0004222;GO:0005622;GO:0016567
CGI_10003703	0.320577	0.0286173	88.5352	0.420121	0.00206978	89.3142	0.473081	0.0010115	86.2047	0.404593	Tripartite motif-containing 2	0.89	protein modification by small protein conjugation or removal	GO:0008270;GO:0071203;GO:0016567
CGI_10007505	0.425567	9.16436e-06	357.187	0.383303	9.41466e-05	376.519	0.344606	6.15348e-05	373.767	0.384492	Tripartite motif-containing 2	0.8665	protein modification by small protein conjugation or removal	GO:0008270;GO:0005622;GO:0016567
CGI_10000289	0.339874	0.00671563	227.307	0.40546	0.00011383	231.907	0.362774	0.000997434	230.511	0.369369	Tripartite motif-containing 2	0.8505	protein modification by small protein conjugation or removal	GO:0008270;GO:0016310;GO:0016301;GO:0005622;GO:0016567
CGI_10011966	0.328914	0.000883067	258.383	0.423292	2.82578e-05	261.299	0.341958	0.00128758	262.326	0.364722	Tripartite motif-containing 2	0.8705	protein modification by small protein conjugation or removal	GO:0008270;GO:0005622;GO:0016567
CGI_10028494	0.33163	0.00931041	103.283	0.475374	0.000313082	102.914	0.275933	0.027955	107.278	0.360979	Tripartite motif-containing 2	0.555	protein modification by small protein conjugation or removal	GO:0016567
CGI_10021906	0.379049	0.0012196	163.739	0.404625	0.000620546	169.012	0.29877	0.0178184	171.368	0.360815	Tripartite motif-containing 2	0.5095	protein modification by small protein conjugation or removal	GO:0008270;GO:0005622;GO:0016567
CGI_10016677	0.329942	0.00118835	197.961	0.439478	3.12168e-06	199.518	0.277893	0.00278651	205.409	0.349104	Tripartite motif-containing 2	0.871	protein modification by small protein conjugation or removal	GO:0003777;GO:0008270;GO:0008152;GO:0007018;GO:0005622;GO:0016567
CGI_10028544	0.22115	0.0359755	155.372	0.380083	8.52715e-05	153.84	0.385865	0.000204559	150.667	0.329033	Tripartite motif-containing 3	0.508	protein modification by small protein conjugation or removal	GO:0008270;GO:0005622;GO:0016567
CGI_10019715	0.337867	0.000188237	347.914	0.25951	0.00517343	371.115	0.383815	1.44888e-05	349.918	0.327064	tripartite motif-containing 2-like isoform X5 [Crassostrea gigas]	0.4985	protein modification by small protein conjugation or removal	GO:0008270;GO:0005622;GO:0016567
CGI_10011868	0.235012	3.14736e-05	1230.97	0.188103	0.00332662	1300.69	0.435667	1.0431e-18	1181.16	0.28626	Cytoplasmic tRNA 2-thiolation 2	0.656	protein modification by small protein conjugation or removal	GO:0016779;GO:0005737;GO:0002098;GO:0000049;GO:0032447;GO:0035556;GO:0034227
CGI_10010265	0.238899	0.00274214	733.404	0.277352	0.000779776	754.137	0.168688	0.00774073	765.577	0.228313	tripartite motif-containing 2-like	0.5025	protein modification by small protein conjugation or removal	GO:0008270;GO:0005622;GO:0016567
CGI_10008093	-0.21054	0.0143525	255.42	-0.203657	0.0180836	264.945	-0.325802	0.000137701	272.291	-0.246666	Tripartite motif-containing 3	0.539	protein modification by small protein conjugation or removal	GO:0008270;GO:0016567
CGI_10010960	-0.266623	0.0034531	360.444	-0.233257	0.0098651	370.3	-0.259927	0.0132961	366.73	-0.253269	ariadne-2 [Harpegnathos saltator]	0.841	protein modification by small protein conjugation or removal	GO:0004842;GO:0008270;GO:0016567
CGI_10020847	-0.288537	9.77426e-10	4341.77	-0.23329	0.000298507	4425.41	-0.283982	8.22662e-07	4423.76	-0.268603	Nicotinamide riboside kinase 1	0.6605	protein modification by small protein conjugation or removal	GO:0004842;GO:0046872;GO:0016310;GO:0016301;GO:0016567
CGI_10024010	-0.390731	2.64274e-09	1350.83	-0.272697	3.26482e-10	1342.47	-0.268728	6.67949e-09	1314.06	-0.310719	ubiquitin carboxyl-terminal hydrolase 8-like	0.68	protein modification by small protein conjugation or removal	GO:0016579;GO:0044444;GO:0036459;GO:0006511
CGI_10001634	-0.480188	4.13905e-06	290.25	-0.208928	0.0170808	271.381	-0.647706	7.68151e-12	317.122	-0.445607	Tripartite motif-containing 2	0.858	protein modification by small protein conjugation or removal	GO:0008270;GO:0005622;GO:0016567
CGI_10008424	-0.615806	1.96739e-06	185.277	-0.378169	0.00279917	174.31	-0.433102	0.000153886	174.89	-0.475692	SUMO-activating enzyme subunit 1 isoform X1	0.743	protein modification by small protein conjugation or removal	GO:0019948;GO:0008022;GO:0016925;GO:0008047;GO:0043008;GO:0007346;GO:1903955;GO:0005654;GO:0046982;GO:0043085;GO:0005829;GO:0004839;GO:0031510;GO:0016567
CGI_10021132	-0.579183	2.33569e-12	305.041	-0.608289	2.01046e-14	321.265	-0.295713	0.00301202	277.477	-0.494395	Tripartite motif-containing 2	0.8475	protein modification by small protein conjugation or removal	GO:0008270;GO:0016310;GO:0016301;GO:0005622;GO:0016567
CGI_10000301	-0.300578	0.0196441	99.4379	-0.417706	0.00115054	108.337	-0.777752	6.73169e-10	123.999	-0.498679	Tripartite motif-containing 3	0.8745	protein modification by small protein conjugation or removal	GO:0008270;GO:0005622;GO:0016567
CGI_10021385	-0.655285	2.63663e-10	138.413	-0.595891	4.72358e-08	140.433	-0.362391	0.0026405	125.401	-0.537855	Tripartite motif-containing 2	0.9125	protein modification by small protein conjugation or removal	GO:0008270;GO:0005622;GO:0016567
CGI_10001235	-0.633179	7.61317e-08	169.699	-0.263601	0.0330221	151.772	-0.840082	4.07793e-10	189.926	-0.578954	Tripartite motif-containing 2	0.8075	protein modification by small protein conjugation or removal	GO:0008270;GO:0016310;GO:0016301;GO:0005622;GO:0016567
CGI_10011476	-0.953824	2.12562e-24	253.594	-0.413756	0.00452827	209.391	-0.384731	0.000317623	202.368	-0.584104	Tripartite motif-containing 2	0.898	protein modification by small protein conjugation or removal	GO:0008270;GO:0005622;GO:0016567
CGI_10023516	-0.663206	6.41254e-07	115.393	-0.573368	8.86676e-05	115.507	-0.530294	0.000151477	111.19	-0.588956	Tripartite motif-containing 2	0.8575	protein modification by small protein conjugation or removal	GO:0008270;GO:0005622;GO:0016567
CGI_10001089	-0.748479	7.26001e-18	270.489	-0.569501	2.14382e-10	260.634	-0.506454	3.07065e-08	248.817	-0.608145	Tripartite motif-containing 3	0.8825	protein modification by small protein conjugation or removal	GO:0008270;GO:0005622;GO:0016567
CGI_10008923	-0.661887	0.000332166	43.3377	-0.512413	0.006193	42.2551	-0.662182	0.00107076	44.431	-0.612161	Tripartite motif-containing 3	0.8725	protein modification by small protein conjugation or removal	GO:0008270;GO:0005622;GO:0016567
CGI_10019358	-0.510204	3.10536e-05	189.607	-0.930601	1.25e-17	237.251	-0.405385	6.35247e-05	185.166	-0.615397	Tripartite motif-containing 2	0.863	protein modification by small protein conjugation or removal	GO:0008270;GO:0016021;GO:0005622;GO:0016567
CGI_10003482	-0.552597	0.0105992	106.915	-0.41028	0.048009	104.594	-0.886871	2.58579e-06	126.645	-0.616583	tripartite motif-containing 45-like	0.6564	protein modification by small protein conjugation or removal	GO:0008270;GO:0005622;GO:0016567
CGI_10012999	-0.940397	2.34518e-21	245.609	-0.257617	0.0121757	191.323	-0.717341	3.61231e-17	226.442	-0.638452	Tripartite motif-containing 45	0.876	protein modification by small protein conjugation or removal	GO:0005524;GO:0008270;GO:0016491;GO:0055114;GO:0005622;GO:0016567
CGI_10011993	-0.605242	2.73838e-07	139.639	-0.736899	1.11112e-11	153.838	-0.627109	2.35246e-07	143.912	-0.656417	Tripartite motif-containing 2	0.848	protein modification by small protein conjugation or removal	GO:0008270;GO:0005622;GO:0016567
CGI_10013297	-0.661963	3.2168e-31	549.27	-0.453465	8.22196e-10	524.705	-0.888522	2.11436e-53	619.304	-0.667983	Tripartite motif-containing 45	0.87	protein modification by small protein conjugation or removal	GO:0005524;GO:0008270;GO:0016491;GO:0055114;GO:0005622;GO:0016567
CGI_10019024	-0.692384	7.46052e-07	74.9104	-0.377945	0.0159207	68.3786	-1.01042	2.1323e-10	88.7283	-0.693583	Tripartite motif-containing 2	0.504	protein modification by small protein conjugation or removal	GO:0008270;GO:0008152;GO:0005622;GO:0016874;GO:0016567
CGI_10011632	-0.699985	5.38043e-07	107.62	-0.369702	0.0150653	97.4904	-1.01211	1.3379e-17	126.34	-0.693934	Tripartite motif-containing 2	0.657	protein modification by small protein conjugation or removal	GO:0016567
CGI_10001580	-0.890557	3.64157e-15	198.52	-0.537397	1.41305e-05	176.772	-0.711215	3.7408e-07	187.366	-0.713056	Tripartite motif-containing 2	0.728	protein modification by small protein conjugation or removal	GO:0016567
CGI_10013816	-0.716755	4.62094e-08	100.559	-1.08623	4.25214e-15	124.455	-0.369143	0.0117775	88.7801	-0.724041	Tripartite motif-containing 3	0.868	protein modification by small protein conjugation or removal	GO:0008270;GO:0005622;GO:0016567
CGI_10013602	-0.47639	0.0479741	27.6575	-0.981139	4.25617e-06	36.2342	-0.715274	0.000688178	31.2717	-0.724268	Tripartite motif-containing 2	0.84	protein modification by small protein conjugation or removal	GO:0008270;GO:0005622;GO:0016567
CGI_10003944	-0.726221	4.27002e-13	154.94	-0.465462	5.29057e-05	144.535	-1.02974	8.47583e-28	181.614	-0.740475	Tripartite motif-containing 45 [Crassostrea gigas]	0.8585	protein modification by small protein conjugation or removal	GO:0005524;GO:0008270;GO:0016491;GO:0055114;GO:0005622;GO:0016567
CGI_10001204	-0.958167	7.24791e-23	283.979	-0.420202	2.66561e-06	233.916	-0.851739	1.43333e-24	275.721	-0.74337	Tripartite motif-containing 45	0.8795	protein modification by small protein conjugation or removal	GO:0005524;GO:0008270;GO:0016491;GO:0055114;GO:0005622;GO:0016567
CGI_10027641	-0.973867	1.76182e-16	234.4	-0.92404	4.74264e-09	239.341	-0.354746	0.0494758	183.317	-0.750884	Tripartite motif-containing 2	0.6345	protein modification by small protein conjugation or removal	GO:0016567
CGI_10025123	-0.674477	2.797e-05	131.762	-0.834871	6.88714e-15	146.805	-0.860539	3.01988e-14	145.735	-0.789962	Tripartite motif-containing 2	0.773	protein modification by small protein conjugation or removal	GO:0008270;GO:0005622;GO:0016567
CGI_10007051	-0.63025	6.82852e-10	132.056	-0.98602	2.41686e-20	161.48	-0.799614	5.10975e-16	145.219	-0.805295	Tripartite motif-containing 3	0.891	protein modification by small protein conjugation or removal	GO:0008270;GO:0005622;GO:0016567
CGI_10001464	-0.779723	6.051e-12	167.139	-0.397835	0.000365997	147.924	-1.54052	3.53831e-69	246.037	-0.906025	Tripartite motif-containing 3	0.8975	protein modification by small protein conjugation or removal	GO:0008270;GO:0005622;GO:0016567
CGI_10025047	-1.487	1.04248e-28	82.3269	-0.762348	4.72382e-05	60.481	-0.56095	0.00289033	54.1776	-0.936765	Tripartite motif-containing 3	0.82	protein modification by small protein conjugation or removal	GO:0008270;GO:0005622;GO:0016567
CGI_10009481	-1.20567	5.00328e-07	26.724	-1.06238	1.16311e-05	25.8133	-0.736361	0.00373291	21.4679	-1.00147	Tripartite motif-containing 2	0.736	protein modification by small protein conjugation or removal	GO:0008270;GO:0016020;GO:0005622;GO:0016567
CGI_10008921	-1.31629	5.12051e-10	58.9307	-0.779695	0.000273926	46.7902	-0.966848	8.99119e-05	50.6241	-1.02094	Tripartite motif-containing 3	0.876	protein modification by small protein conjugation or removal	GO:0008270;GO:0005622;GO:0016567
CGI_10014299	-1.27164	0.000241236	9.64124	-1.06024	0.00514871	8.98519	-1.03841	0.00539845	8.62505	-1.12343	Tripartite motif-containing 2	0.8005	protein modification by small protein conjugation or removal	GO:0008270;GO:0006508;GO:0004222;GO:0005622;GO:0016567
CGI_10021095	-1.04264	1.30528e-12	83.8167	-0.78701	4.78654e-06	77.4834	-1.58659	4.88752e-29	112.753	-1.13875	Tripartite motif-containing 2	0.909	protein modification by small protein conjugation or removal	GO:0008270;GO:0005622;GO:0016567
CGI_10022716	-1.666	1.05096e-56	150.632	-1.58162	4.69183e-41	150.037	-0.318317	0.0342179	81.8415	-1.18864	tripartite motif-containing 55-like [Crassostrea gigas]	0.8305	protein modification by small protein conjugation or removal	GO:0008270;GO:0005622;GO:0016567
CGI_10012041	-1.3831	4.41737e-11	31.5184	-1.1364	4.09729e-06	29.0665	-1.06778	0.000117685	27.693	-1.19576	Tripartite motif-containing 45	0.6	protein modification by small protein conjugation or removal	GO:0008270;GO:0016567
CGI_10004584	-2.32374	3.7753e-74	106.083	-0.708876	0.000402876	47.7932	-0.671977	0.000235497	45.8262	-1.23486	Tripartite motif-containing 2	0.801	protein modification by small protein conjugation or removal	GO:0008270;GO:0005622;GO:0016567
CGI_10015214	-0.840515	0.0058269	15.1693	-1.41131	3.2023e-06	21.6876	-1.71494	2.53872e-10	25.0133	-1.32226	Tripartite motif-containing 3	0.854	protein modification by small protein conjugation or removal	GO:0008270;GO:0005622;GO:0016567
CGI_10003409	-1.47158	3.71383e-08	30.7461	-0.985575	9.0518e-05	24.2024	-1.56541	8.52171e-11	32.2764	-1.34086	Tripartite motif-containing 2	0.7735	protein modification by small protein conjugation or removal	GO:0008270;GO:0005622;GO:0016567
CGI_10007535	-1.15942	0.0123985	53.5915	-1.18974	0.00108597	48.6784	-1.89955	1.91012e-06	83.7978	-1.41624	Tripartite motif-containing 2	0.5965	protein modification by small protein conjugation or removal	GO:0008270;GO:0005622;GO:0016567
CGI_10021296	-1.41703	2.98731e-15	52.1815	-1.75638	8.15265e-31	64.7016	-1.19181	5.99275e-13	47.1853	-1.45507	Tripartite motif-containing 2	0.83	protein modification by small protein conjugation or removal	GO:0008270;GO:0005622;GO:0016567
CGI_10011981	-0.930288	0.00571423	17.2789	-2.01344	2.33951e-14	32.7087	-1.42401	1.7003e-07	22.5342	-1.45591	Tripartite motif-containing 45	0.599	protein modification by small protein conjugation or removal	GO:0008270;GO:0005622;GO:0016567
CGI_10023474	-1.21308	0.00429047	7.23071	-1.02766	0.0155677	6.47768	-2.20456	4.01464e-11	12.94	-1.48176	tripartite motif-containing 2-like	0.6715	protein modification by small protein conjugation or removal	GO:0008270;GO:0008152;GO:0005622;GO:0016874;GO:0016567
CGI_10006379	-1.26193	5.46715e-09	40.9675	-2.16158	5.67438e-39	68.9582	-1.19871	2.48029e-10	40.0594	-1.54074	Tripartite motif-containing 3	0.627	protein modification by small protein conjugation or removal	GO:0008270;GO:0005622;GO:0016567
CGI_10025122	-1.60216	6.07854e-13	75.5345	-1.30015	1.42691e-10	66.0197	-2.10471	1.31345e-56	98.2641	-1.669	Tripartite motif-containing 3	0.814	protein modification by small protein conjugation or removal	GO:0008270;GO:0005622;GO:0016567
CGI_10012007	-1.90055	2.42141e-11	48.3755	-2.14655	2.08121e-26	54.1093	-1.43578	1.30236e-09	35.7801	-1.82762	Tripartite motif-containing 2	0.821	protein modification by small protein conjugation or removal	GO:0008270;GO:0005622;GO:0016567
CGI_10004094	-1.32795	1.88058e-19	68.0538	-1.56859	2.37276e-19	80.985	-2.88775	1.35363e-104	169.853	-1.9281	Tripartite motif-containing 2	0.8615	protein modification by small protein conjugation or removal	GO:0008270;GO:0005622;GO:0016567
CGI_10004342	-1.44152	0.000855266	4.86698	-2.13779	8.33569e-08	8.13743	-2.3068	5.58519e-10	8.47843	-1.96203	Tripartite motif-containing 45	0.762	protein modification by small protein conjugation or removal	GO:0008270;GO:0005622;GO:0016567
CGI_10010493	-1.5764	2.85182e-07	24.4353	-1.75027	8.73787e-10	27.5227	-3.05478	4.52443e-48	58.1263	-2.12715	Tripartite motif-containing 2	0.6295	protein modification by small protein conjugation or removal	GO:0008270;GO:0005622;GO:0016567
CGI_10009727	-4.62579	2.14239e-67	65.6366	-2.13957	4.85171e-09	12.704	-4.29228	1.7072e-55	51.5004	-3.68588	Tripartite motif-containing 3	0.669	protein modification by small protein conjugation or removal	GO:0016567
CGI_10001655	3.67456	5.2169e-34	32.002	2.50131	4.33907e-26	36.6758	1.27265	1.41017e-08	43.245	2.48284	Heat shock 70 kDa 12A	0.736	response to stress	GO:0006950
CGI_10005319	1.62787	8.54851e-16	43.2082	1.44396	9.33094e-07	45.7271	1.87584	7.39673e-15	42.1104	1.64922	heat-shock Hsp20	0.868	response to stress	GO:0006950
CGI_10027393	1.27597	1.01956e-10	49.4095	1.13143	9.05883e-08	52.8796	1.2792	2.86781e-11	50.4517	1.22887	structural maintenance of chromosomes 3-like	0.612	response to stress	GO:0006281;GO:0019827;GO:0008280;GO:0050794;GO:0034991;GO:0036033;GO:0007064;GO:0000800;GO:0003682;GO:0007126
CGI_10015706	1.16385	4.02874e-12	223.406	0.614373	0.00123192	266.413	1.74068	4.57702e-26	204.685	1.17297	heat shock 70 kDa 12B-like	0.758	response to stress	GO:0016021;GO:0006950
CGI_10005009	0.928587	1.05119e-12	108.856	1.38255	8.62197e-22	102.592	1.07288	3.75872e-16	107.57	1.128	heat shock 70 kDa 12A-like	0.717	response to stress	GO:0016021;GO:0006950
CGI_10023203	1.03492	2.56754e-13	147.613	1.23684	5.17129e-16	146.897	1.07746	2.14695e-14	149.26	1.11641	flap endonuclease GEN homolog 1 [Loxodonta africana]	0.6425	response to stress	GO:0003677;GO:0006281;GO:0090305;GO:0004519
CGI_10019917	1.30173	2.77299e-20	190.807	0.59599	4.06252e-05	235.359	1.01915	4.0048e-14	207.165	0.972293	Microsomal triglyceride transfer large subunit	0.6085	response to stress	GO:0006869;GO:0005319;GO:0006950
CGI_10022516	0.590697	0.00196448	74.9506	0.525348	0.00160029	79.6699	1.59592	2.2108e-11	60.4522	0.903987	heat shock 70 kDa 12A-like [Crassostrea gigas]	0.7605	response to stress	GO:0006950
CGI_10011430	0.862793	8.89224e-25	803.073	0.924308	3.58851e-35	823.433	0.778572	4.54739e-25	837.297	0.855225	serine threonine- kinase Nek4-like	0.8485	response to stress	GO:2001020;GO:1900062;GO:0007067;GO:0006974;GO:0042995;GO:0023014;GO:0051301;GO:0005524;GO:0004702;GO:0005737;GO:0045893;GO:0030145;GO:2000772
CGI_10013509	0.6618	1.9406e-05	79.164	0.880649	5.68927e-10	78.0047	0.803909	7.56958e-08	77.8835	0.782119	heat shock 70 kDa 12A-like	0.6565	response to stress	GO:0006950
CGI_10010863	0.674381	0.00247485	54.9031	0.588284	0.00566402	58.5801	0.689532	0.00487564	55.7091	0.650732	7,8-dihydro-8-oxoguanine triphosphatase	0.8185	response to stress	GO:0006281;GO:0009155;GO:0005739;GO:0009217;GO:0008413
CGI_10028250	0.431781	0.000467151	141.462	0.615187	2.66394e-08	139.568	0.850302	2.26295e-12	128.671	0.632424	CCR4-NOT transcription complex subunit 1	0.906	response to stress	GO:0090503;GO:0006351;GO:0035195;GO:0000932;GO:0060213;GO:0042974;GO:0000289;GO:0044822;GO:0005778;GO:0004535;GO:0000122;GO:0005634;GO:0032947;GO:0005615;GO:0006977;GO:0010606;GO:0048387;GO:0070016;GO:2000036;GO:0005829;GO:0033147;GO:0030331;GO:0030015;GO:0001829
CGI_10004092	0.51877	0.0229499	30056.2	0.306582	8.93183e-05	33566.3	0.77513	5.11393e-16	28790.6	0.533494	Extracellular superoxide dismutase [Cu-Zn] [Crassostrea gigas]	0.781	response to stress	GO:0046872;GO:0019430;GO:0055114;GO:0004784;GO:0008228;GO:0006979
CGI_10001443	0.647233	2.29048e-20	524.394	0.385519	0.000278754	587.85	0.542034	5.92133e-08	550.451	0.524929	heat shock 70 kDa 12A-like [Crassostrea gigas]	0.603	response to stress	GO:0006950
CGI_10019804	0.577939	0.00067985	416.24	0.396837	0.0156117	457.151	0.543154	0.000228026	429.401	0.505977	glutathione S-transferase theta-2-like [Biomphalaria glabrata]	0.743	response to stress	GO:0008152;GO:0016740;GO:0006979
CGI_10005917	0.517395	1.00784e-06	211.57	0.400656	0.00276784	227.822	0.549996	7.09435e-07	213.834	0.489349	Heat shock 70 kDa 12A	0.7005	response to stress	GO:0006950
CGI_10023374	0.445231	3.38957e-07	212.46	0.391632	6.46553e-05	224.679	0.594322	7.0956e-11	207.69	0.477062	DNA-(apurinic or apyrimidinic site) lyase 2-like	0.639	response to stress	GO:0003677;GO:0006281;GO:0090305;GO:0008270;GO:0043231;GO:0003906
CGI_10012978	0.367333	0.00129821	621.687	0.601464	2.7542e-08	604.261	0.457775	8.39626e-06	617.726	0.475524	heat shock 70 kDa 12B-like [Crassostrea gigas]	0.6055	response to stress	GO:0006950
CGI_10004561	0.353943	0.00148028	144.602	0.32544	0.00443546	151.869	0.610642	1.55866e-08	136.912	0.430008	DNA-directed RNA polymerase II subunit RPB9	0.9035	response to stress	GO:0003677;GO:0008270;GO:0003899;GO:0001193;GO:0006283;GO:0005730;GO:0006367;GO:0005665
CGI_10005805	0.49637	1.75524e-09	414.932	0.271812	0.00050831	462.196	0.510496	4.8808e-11	421.593	0.426226	thioredoxin-related transmembrane 1-like	0.7545	response to stress	GO:0003756;GO:0016021;GO:0005783;GO:0045454;GO:0006457;GO:0034976
CGI_10002640	0.223475	0.015357	328.095	0.551996	2.10185e-08	309.261	0.483596	7.75106e-08	308.959	0.419689	DNA repair RAD51 homolog 2	0.703	response to stress	GO:0033063;GO:0008094;GO:0007131;GO:0003690;GO:0000724;GO:0000732;GO:0007596;GO:0000731;GO:0000400;GO:0005654;GO:0003697;GO:0005657;GO:0005524;GO:0005515;GO:0010971
CGI_10008023	0.171908	0.0195213	575.566	0.319305	0.000193832	571.075	0.577188	1.75487e-13	518.97	0.356134	DNA excision repair ERCC-6-like 2	0.7795	response to stress	GO:0003676;GO:0005524;GO:0005737;GO:0043231;GO:0008152;GO:0004386;GO:0006974
CGI_10008373	0.208662	0.00462411	702.583	0.219157	0.004187	728.755	0.252177	0.00185984	707.115	0.226665	TGF-beta-activated kinase 1 and MAP3K7-binding 3 isoform X2	0.87	response to stress	GO:0008270;GO:0038095;GO:0007254;GO:0007249;GO:0051092;GO:0005886;GO:0005654;GO:0002223;GO:0000187;GO:0070062;GO:0005515;GO:0002755;GO:0010507;GO:0016021;GO:0070423;GO:0005829;GO:0010008;GO:0016301
CGI_10017098	0.191284	0.0224121	314.862	0.263055	0.000529062	319.9	0.199086	0.018148	319.887	0.217808	histone acetyltransferase KAT5-like isoform X2	0.804	response to stress	GO:0000812;GO:1901985;GO:0003682;GO:0005730;GO:0045944;GO:0006302;GO:0000122;GO:0006978;GO:0005667;GO:0004402;GO:0043161;GO:0071392;GO:0070491;GO:0032703;GO:0003713;GO:0043274;GO:0005829;GO:0016573;GO:0032777;GO:0032403;GO:0010212
CGI_10024475	0.148797	0.0109421	12826.2	0.185953	0.000595202	13186	0.23693	2.93889e-06	12720.6	0.19056	major vault -like [Biomphalaria glabrata]	0.869	response to stress	GO:0005634;GO:0001654;GO:0030529;GO:0005737;GO:0031102;GO:0007420
CGI_10005974	-0.201667	0.0130051	1258.39	-0.187952	0.0330544	1303.28	-0.336594	5.44978e-05	1352.2	-0.242071	universal stress A [Aplysia californica]	0.6555	response to stress	GO:0006950;GO:0006950
CGI_10007259	-0.352733	1.56726e-09	1619.3	-0.167251	0.0460588	1570.45	-0.228639	0.000312284	1575.41	-0.249541	universal stress A [Crassostrea gigas]	0.682	response to stress	GO:0006950
CGI_10007955	-0.230539	0.00137764	508.787	-0.184223	0.0302638	520.449	-0.343832	7.76976e-07	542.303	-0.252865	universal stress A [Crassostrea gigas]	0.6585	response to stress	GO:0006950;GO:0006950
CGI_10015472	-0.207536	0.0282482	1245.86	-0.422245	1.7059e-08	1408.25	-0.212761	0.01153	1273.18	-0.280848	peroxidasin homolog isoform X2	0.6635	response to stress	GO:0004601;GO:0006979;GO:0098869;GO:0055114;GO:0020037;GO:0008063
CGI_10005388	-0.317816	4.67341e-05	1591.94	-0.164064	0.0170749	1562.69	-0.394712	3.58465e-07	1673.96	-0.292197	cysteine-rich 1	0.8985	response to stress	GO:0071493;GO:0008270;GO:0010043;GO:0005737;GO:0003680;GO:0008301;GO:0042277;GO:0008630;GO:0071236
CGI_10005918	-0.20326	0.00603026	544.519	-0.393955	6.41969e-06	610.235	-0.317009	1.28677e-05	580.369	-0.304741	heat shock 70 kDa 12A-like [Crassostrea gigas]	0.657	response to stress	GO:0006950
CGI_10008263	-0.422321	1.3473e-09	1154.11	-0.310517	1.50425e-06	1148.72	-0.241065	0.00706654	1097.28	-0.324634	universal stress A	0.7215	response to stress	GO:0006950
CGI_10014868	-0.230106	0.0448814	149.747	-0.366745	0.000578728	164.243	-0.389608	0.000693311	162.595	-0.32882	dnaJ homolog subfamily C member 17	0.7125	response to stress	GO:0000166;GO:0003676;GO:0006950
CGI_10005614	-0.304313	4.86186e-05	1789.5	-0.302126	1.92351e-05	1860.49	-0.389036	1.7393e-07	1887.61	-0.331825	heat shock 70 kDa 12A-like	0.663	response to stress	GO:0006950
CGI_10006174	-0.307007	3.70474e-05	2316	-0.405582	3.91634e-07	2504.83	-0.417698	2.30535e-05	2469.9	-0.376762	fibulin-1-like isoform X2	0.641	response to stress	GO:0005634;GO:0045002;GO:0005509;GO:0000730
CGI_10014254	-0.277146	0.028652	114.074	-0.443029	0.00621232	127.185	-0.469819	0.000207869	125.815	-0.396665	dnaJ homolog subfamily C member 22-like	0.6175	response to stress	GO:0016021;GO:0006950
CGI_10020963	-0.61536	5.11068e-07	194.025	-0.376419	0.00177085	182.676	-0.341535	0.00664294	176.747	-0.444438	heat shock 70 kDa 12B-like [Crassostrea gigas]	0.608	response to stress	GO:0006950
CGI_10008268	-0.529183	2.8413e-05	412.585	-0.429321	0.000524243	411.751	-0.573286	0.000134207	429.489	-0.510597	microsomal triglyceride transfer large subunit-like	0.6555	response to stress	GO:0006869;GO:0005319;GO:0006950
CGI_10002994	-0.42538	3.83918e-07	425.579	-0.485951	8.19714e-09	453.965	-0.632487	2.73959e-10	473.602	-0.514606	heat shock 70 kDa 12A-like	0.8042	response to stress	GO:0006950
CGI_10015527	-1.2825	1.68406e-05	305.5	-0.319498	0.0133893	192.912	-0.498244	3.56598e-05	203.143	-0.700081	Breast cancer type 2 susceptibility	0.5845	response to stress	GO:0050794;GO:0051276;GO:0000724;GO:0048856;GO:1902589;GO:0044424;GO:0032501;GO:0044767
CGI_10004251	-0.722298	0.000475732	43.6148	-0.793744	6.95895e-05	46.8696	-0.711105	0.000267826	44.3077	-0.742382	universal stress A	0.732	response to stress	GO:0006950
CGI_10021628	-0.726777	2.89983e-13	167.907	-0.677021	4.06464e-12	170.913	-0.885341	3.77904e-16	184.339	-0.763046	heat shock 70 kDa 12A-like [Crassostrea gigas]	0.6605	response to stress	GO:0006950
CGI_10022387	-0.735683	1.58703e-07	181.779	-0.887711	9.82643e-12	202.269	-0.806499	9.64332e-11	190.964	-0.809964	universal stress A	0.793	response to stress	GO:0006950
CGI_10026981	-0.877992	1.04017e-09	153.122	-1.00542	1.96488e-23	168.164	-0.59902	8.37944e-09	137.733	-0.827477	USP isoform 2	0.7145	response to stress	GO:0006950;GO:0006950
CGI_10018333	-0.946183	9.86787e-06	31.1267	-0.705835	0.00607455	29.0884	-0.954143	9.61015e-06	31.9468	-0.86872	Heat shock 70 kDa 12A	0.9133	response to stress	GO:0006950
CGI_10008719	-0.684177	0.000779787	129.577	-1.48117	9.68286e-28	196.548	-0.796839	1.10666e-07	138.056	-0.987395	heat shock 70 kDa 12A-like	0.6785	response to stress	GO:0006950
CGI_10000285	-1.44166	1.46907e-22	70.3602	-0.714152	1.16695e-05	51.4422	-0.865926	1.48258e-07	54.0589	-1.00724	Structure-specific endonuclease subunit SLX4	0.9836	response to stress	GO:0017108;GO:0006281;GO:0090305;GO:0006260;GO:0033557
CGI_10019803	-1.39139	1.59776e-09	77.2977	-0.496489	0.0470086	51.5689	-1.39219	3.0863e-14	77.307	-1.09336	glutathione S-transferase theta-2-like [Biomphalaria glabrata]	0.5945	response to stress	GO:0008152;GO:0016740;GO:0006979
CGI_10009306	-1.80131	1.48116e-32	193.914	-0.593854	0.0062545	110.845	-1.02771	1.27832e-11	131.783	-1.14096	heat shock 70 kDa 12A-like	0.7415	response to stress	GO:0006950
CGI_10013206	-1.6314	1.02371e-06	15.3495	-0.899102	0.0210556	10.4405	-1.14661	0.000569068	11.4543	-1.22571	Chorion peroxidase	0.7425	response to stress	GO:0004601;GO:0006979;GO:0098869;GO:0055114;GO:0020037
CGI_10009339	-1.37962	2.60938e-20	212.472	-1.2203	8.32344e-14	204.303	-1.25478	2.97046e-20	202.642	-1.2849	flap endonuclease GEN homolog 1	0.545	response to stress	GO:0003677;GO:0006281;GO:0090305;GO:0004519
CGI_10002928	-1.62308	1.4038e-20	286.096	-0.818619	2.9665e-08	196.457	-1.45266	2.66325e-33	261.717	-1.29812	asteroid homolog 1-like	0.712	response to stress	GO:0006281;GO:0090305;GO:0004518
CGI_10003417	-1.30326	0.00015704	67.0961	-2.47995	6.70751e-18	140.521	-2.42563	3.07422e-16	135.062	-2.06961	heat shock 70	0.9225	response to stress	GO:0005524;GO:0006950
CGI_10023199	-3.11678	5.02536e-26	28.3445	-1.54517	0.000126385	10.9686	-2.09357	5.5219e-09	15.1005	-2.25184	Chorion peroxidase	0.6945	response to stress	GO:0004601;GO:0006979;GO:0098869;GO:0055114;GO:0020037
CGI_10017415	-1.61047	7.08302e-05	11.2826	-3.2096	6.66053e-25	31.1191	-3.40309	6.1632e-25	38.0816	-2.74105	Chorion peroxidase	0.589	response to stress	GO:0004601;GO:0006979;GO:0098869;GO:0055114;GO:0020037
CGI_10003675	-3.72595	2.82259e-43	57.7377	-1.87286	1.60524e-09	16.9138	-2.95993	1.38138e-29	32.5076	-2.85291	Werner syndrome ATP-dependent helicase-like	0.6815	response to stress	GO:0003676;GO:0005524;GO:0006281;GO:0003678;GO:0008026;GO:0044424
CGI_10024145	1.5729	1.2203e-07	262.531	5.02527	2.67831e-39	213.513	5.85078	4.00198e-62	208.484	4.14965	kelch 24	0.575		unknown
CGI_10002575	5.2693	9.63994e-64	71.7042	0.844284	0.000398533	113.515	6.10973	9.72059e-63	72.3933	4.07444	short-chain collagen C4-like	0.7165		unknown
CGI_10018393	2.23797	4.91166e-25	40.4785	4.38932	4.0349e-43	36.2568	4.96332	8.18143e-43	34.8991	3.86353	Ras 3	0.6414		unknown
CGI_10012422	4.91327	2.02697e-61	73.4822	0.801083	2.80817e-05	117.43	5.71678	8.34282e-62	73.9934	3.81038	hypothetical protein CGI_10012422	0.6515		unknown
CGI_10000052	1.03665	6.01379e-09	604.54	2.51072	7.31459e-66	498.207	7.6659	4.6767e-161	419.45	3.73775	sodium- and chloride-dependent glycine transporter 1-like	0.6615		GO:0006836;GO:0005328;GO:0055085;GO:0016021
CGI_10008734	3.91104	1.24029e-23	17.8093	3.55544	7.08108e-22	18.9771	3.16685	8.40508e-18	18.9631	3.54445	hypothetical protein CGI_10008734	0.8525		unknown
CGI_10014691	4.8401	9.25026e-38	30.0673	0.623736	0.0231994	50.7493	5.06819	1.73557e-38	30.6079	3.51067	caspase-7-like isoform X1 [Crassostrea gigas]	0.9378		unknown
CGI_10002601	2.60373	1.07043e-16	30.4221	3.37203	4.58648e-26	30.099	4.52943	2.83396e-32	27.9533	3.50173	deoxyribonuclease TATDN2	0.653		GO:0016788;GO:0008152
CGI_10019592	2.61406	9.39852e-14	13.4089	3.57191	4.67266e-19	12.9884	3.86648	1.52084e-20	12.4979	3.35082	deoxyribonuclease TATDN2	0.6645		GO:0016788;GO:0008152
CGI_10025148	3.19647	3.13937e-14	8.82586	3.25059	1.32158e-14	9.2597	3.56529	3.92114e-16	8.84627	3.33745	GTPase IMAP family member 4	0.7095		GO:0005525
CGI_10005454	2.5118	8.89704e-41	148.133	2.57753	1.05658e-50	153.632	4.78244	1.047e-107	133.963	3.29059	GTPase IMAP family member 4	0.747		GO:0005525
CGI_10019196	2.34961	2.5349e-44	146.984	4.03592	9.99512e-43	134.295	3.35336	3.93006e-91	137.917	3.24629	short-chain collagen C4-like	0.7485		GO:0016021
CGI_10016224	2.82702	2.2574e-21	49.1181	2.74864	4.30247e-20	51.4988	4.07716	2.12897e-35	46.8355	3.21761	hypothetical protein CGI_10016224	1		unknown
CGI_10017422	1.284	5.15196e-23	209.829	3.90044	3.73344e-84	164.62	4.32285	7.68592e-116	159.222	3.1691	Ras 3	0.63		unknown
CGI_10009248	2.8008	4.46353e-10	6.61962	3.08855	2.23506e-11	6.79427	3.0424	3.86409e-11	6.66289	2.97725	subfamily C member 24	0.8067		unknown
CGI_10014950	4.00317	1.37604e-24	20.0897	3.028	1.65118e-18	22.2337	1.59372	4.5973e-08	26.1071	2.87496	Bromodomain and WD repeat-containing 2	0.668		unknown
CGI_10005335	6.06571	4.27581e-81	116.851	0.769669	0.0022695	189.507	1.75075	5.82542e-16	151.555	2.86204	Endoglucanase E-4	0.8265		GO:0019902;GO:0008270;GO:0007156;GO:0005576;GO:0005763;GO:0004222;GO:0008810;GO:0030414;GO:0007229;GO:0003723;GO:0007219;GO:0003735;GO:0006509;GO:0010923;GO:0005509;GO:0016021;GO:0030245;GO:0010466;GO:0030159;GO:0030247
CGI_10017033	1.96127	4.15977e-27	547.193	0.576809	0.0474452	755.798	6.00077	1.29398e-163	455.119	2.84628	hypothetical protein CGI_10017033	0.8533		GO:0016021
CGI_10006751	2.74477	1.099e-13	12.0978	2.70855	4.26464e-13	12.6901	2.90511	1.01484e-14	12.2216	2.78614	VWFA and cache domain-containing 1	0.8223		unknown
CGI_10004912	3.02707	1.30836e-17	768.953	1.11449	0.0142378	1007.92	4.21646	5.00192e-37	753.3	2.78601	hypothetical protein CGI_10004912	0.8229		GO:0005509;GO:0016021
CGI_10021503	2.05679	1.29581e-07	56.5848	1.91377	1.42632e-07	61.0681	4.22879	1.44737e-42	51.5073	2.73312	hypothetical protein CGI_10021503	1		unknown
CGI_10000373	2.00901	1.44085e-07	8.34437	2.43573	3.8762e-10	8.30715	3.44865	4.26974e-15	7.3299	2.63113	short-chain collagen C4-like	0.7845		unknown
CGI_10020833	2.44332	5.99205e-18	19.9604	3.74165	4.2826e-26	18.731	1.627	4.49791e-11	22.9638	2.60399	GATA zinc finger domain-containing 14-like	1		unknown
CGI_10011067	0.891352	3.40243e-05	87.3606	5.06184	1.05786e-60	60.6828	1.5382	1.22094e-18	78.1726	2.49713	hypothetical protein CGI_10011067	0.64		unknown
CGI_10025586	0.516638	0.000832276	333.185	0.552463	0.00136025	343.021	6.40582	7.96295e-108	201.987	2.49164	ammonium transporter 3	0.6575		GO:0046872;GO:0006810
CGI_10014806	1.31758	0.000474652	10.6217	2.57723	1.89445e-11	9.18701	3.56876	2.5141e-16	8.2045	2.48786	hyaluronan mediated motility receptor-like [Crassostrea gigas]	0.9233		GO:0005525
CGI_10020704	3.04568	4.60458e-13	7.10442	2.40041	6.50145e-10	8.02065	1.99161	1.28262e-07	8.30486	2.47923	ATP-dependent DNA helicase -like	0.59		GO:0008152;GO:0004386
CGI_10015447	1.10411	3.8218e-06	129.587	5.75678	9.71915e-72	94.3427	0.541189	0.0486677	153.274	2.46736	nuclease HARBI1	0.826		unknown
CGI_10026845	2.5937	7.82538e-14	25.5366	2.39693	1.60078e-10	26.9828	2.37891	1.26384e-12	26.8227	2.45651	coadhesin-like isoform X1	0.7115		unknown
CGI_10006139	2.87148	8.03929e-11	5.95162	2.40442	4.72211e-08	6.55362	1.94825	1.77399e-06	6.99075	2.40805	dentin sialophospho -like isoform X1	0.944		GO:0016021
CGI_10014841	0.760549	0.00438092	23.9678	2.48511	2.41921e-13	18.0114	3.95358	5.29044e-24	15.8921	2.39974	short-chain collagen C4-like	0.7415		unknown
CGI_10004387	1.4218	3.23252e-07	30.6517	2.36994	6.02562e-17	27.6898	3.16636	1.45482e-22	25.1466	2.31937	Receptor-type tyrosine- phosphatase F	0.638		GO:0004725;GO:0046872;GO:0016021;GO:0035335
CGI_10015517	1.07821	6.08986e-06	133.699	4.56723	1.92613e-77	99.0558	1.27949	3.57586e-17	132.057	2.30831	hypothetical protein CGI_10015517	0.7867		unknown
CGI_10008195	2.87481	2.26577e-12	7.67591	2.00076	6.33876e-08	8.98288	2.00028	8.58415e-08	8.82259	2.29195	hypothetical protein CGI_10008195	1		unknown
CGI_10004190	2.27143	6.61378e-07	3.99122	2.06215	6.43239e-06	4.36614	2.49497	9.92137e-08	3.97622	2.27618	hypothetical protein CGI_10004190	0.902		GO:0016021
CGI_10000786	2.50908	1.19135e-09	8.18437	2.57031	4.52426e-10	8.56723	1.66605	1.43807e-05	9.60705	2.24848	melatonin receptor type 1B-like	0.6625		GO:0004930;GO:0007186;GO:0016021
CGI_10026723	2.81751	2.72776e-52	255.967	0.722243	5.13583e-06	377.113	3.16161	4.48507e-64	254.831	2.23379	Paired box pox-meso	0.7425		GO:0005634;GO:0003677;GO:0006351;GO:0007275;GO:0016021;GO:0006355
CGI_10001717	2.1279	8.39217e-12	14.0091	2.05057	1.3901e-11	14.7799	2.51989	7.57214e-14	13.5765	2.23279	hypothetical protein CGI_10001717	0.88		unknown
CGI_10014982	1.63711	2.24724e-08	18.3885	2.70765	3.38669e-15	16.5075	2.3138	1.22777e-12	16.9011	2.21952	protocadherin Fat 4-like	0.597		GO:0005509;GO:0016020;GO:0007156
CGI_10008861	1.88965	1.31527e-73	224.399	1.36482	4.5274e-46	255.594	3.37987	2.08817e-51	195.81	2.21145	hypothetical protein CGI_10008861	1		unknown
CGI_10001318	0.869728	0.00963706	19.1749	3.35365	4.885e-16	13.7362	2.36228	5.11129e-11	14.7983	2.19522	Tyrosine- phosphatase non-receptor type 6	0.8875		GO:0008270;GO:0004725;GO:0016021;GO:0035335
CGI_10011855	1.72622	0.000342147	5.05786	2.43992	4.46187e-07	4.84163	2.40215	6.06107e-07	4.74774	2.18943	Collagen alpha-5(VI) chain	0.7371		GO:0005581;GO:0005509;GO:0016021;GO:0007156
CGI_10000930	2.5819	1.70095e-31	205.833	1.34655	3.58036e-11	256.857	2.57421	4.00219e-46	211.699	2.16755	Sushi domain-containing 2	0.7306		GO:0043167
CGI_10003401	0.61465	0.00478856	39.2683	2.85155	1.31388e-25	27.6149	2.90475	6.46437e-26	26.9647	2.12365	hypothetical protein CGI_10003401	0.7005		unknown
CGI_10008656	0.898937	1.15847e-06	131.46	0.56186	0.00234582	149.974	4.88105	6.77928e-66	89.9764	2.11395	hypothetical protein CGI_10008656	0.6875		GO:0046872
CGI_10008654	0.601083	0.00073479	139.347	0.689136	0.000212306	141.511	5.0113	1.54964e-68	87.8535	2.10051	ammonium transporter 3	0.72		GO:0008519;GO:0072488;GO:0046872;GO:0016021
CGI_10005759	2.16447	4.66016e-10	31.4362	1.82834	2.69156e-08	34.6442	2.30669	4.61069e-11	31.6766	2.09983	sortilin-related receptor	0.565		GO:0016021
CGI_10003430	1.57852	6.63088e-15	2828.45	2.33303	7.67312e-44	2656.63	2.29511	1.75212e-35	2611.41	2.06889	von Willebrand factor D and EGF domain-containing -like	0.6195		GO:0016021
CGI_10011591	1.53515	0.000358639	4.62222	2.47613	7.3629e-08	4.1006	2.17518	1.57835e-06	4.17981	2.06216	---NA---	0		unknown
CGI_10025952	2.22923	1.61287e-06	3.13898	1.92339	4.71887e-05	3.52414	1.91248	4.54991e-05	3.4644	2.0217	Mannose-binding A	0.9225		GO:0005524;GO:0005737;GO:0016021;GO:0004828;GO:0016310;GO:0016301;GO:0006434
CGI_10014531	0.699921	0.00046996	34.1734	3.44483	1.06662e-29	23.5975	1.88137	1.10687e-16	27.1921	2.00871	hypothetical protein CGI_10014531	0.868		GO:0046872
CGI_10024316	2.22733	4.34821e-11	15.1964	2.50961	1.07488e-13	15.3985	1.28611	0.000102858	18.279	2.00768	hypothetical protein CGI_10024316	0.609		GO:0016568;GO:0005634;GO:0008270
CGI_10016280	1.75527	4.50625e-08	32.33	2.81853	6.71365e-23	30.0617	1.41792	1.09045e-08	35.7403	1.99724	hypothetical protein CGI_10016280	0.94		unknown
CGI_10005704	1.94837	1.06787e-25	157.416	3.36133	3.17596e-58	142.918	0.66473	0.00127414	209.138	1.99148	hypothetical protein CGI_10005704	0.7375		unknown
CGI_10000322	3.31052	2.86011e-34	36.3149	1.97497	6.31954e-19	43.3164	0.644957	0.00388248	56.0173	1.97682	hypothetical protein CGI_10000322	0.801		unknown
CGI_10002492	2.06235	7.38056e-18	58.4725	2.18354	8.89878e-20	59.9334	1.66865	4.40231e-12	63.3212	1.97151	hypothetical protein CGI_10002492	0.7482		GO:0016021
CGI_10021294	3.04444	6.57469e-27	38.5581	0.83053	0.000572209	56.7435	1.99836	6.97506e-15	44.0984	1.95778	hypothetical protein CGI_10021294	0.6335		unknown
CGI_10013702	3.36464	2.40444e-17	12.0737	1.13405	0.000236047	17.2938	1.3629	7.71824e-06	16.1084	1.95386	F-box WD repeat-containing 5-like	0.6675		unknown
CGI_10005422	2.28967	1.59274e-56	222.775	1.19198	1.14272e-08	275.012	2.37623	3.69932e-83	225.494	1.95263	beta-lactamase 4	0.6295		GO:0016021
CGI_10003246	2.31214	1.24906e-08	8.12246	1.67055	1.48988e-05	9.43553	1.87293	4.71266e-06	8.86137	1.95187	hypothetical protein CGI_10003246	1		unknown
CGI_10000074	0.859482	0.000120969	37.6815	0.731771	0.010076	40.2872	4.24343	2.77539e-32	25.5859	1.94489	39S ribosomal mitochondrial	0.5795		GO:0003735;GO:0015934;GO:0006412
CGI_10012079	1.82263	1.13496e-23	66.4394	1.83777	7.31999e-28	69.1556	2.16721	2.85926e-34	64.7323	1.94254	cyclin-dependent kinase 14-like	0.6179		GO:0005524;GO:0004672;GO:0016310
CGI_10003233	1.96093	3.20343e-16	276.534	1.74357	9.19982e-06	285.197	2.10586	1.4706e-20	277.723	1.93678	PREDICTED: uncharacterized protein LOC106817620 isoform X1 [Priapulus caudatus]	0.671		unknown
CGI_10008194	2.60111	4.64337e-11	8.06495	1.74638	1.58888e-06	9.53602	1.45213	8.89463e-05	9.88131	1.93321	hypothetical protein CGI_10008194	0.97		GO:0016021
CGI_10027304	1.75176	9.52547e-09	19.2167	0.875138	0.0134525	23.9405	3.12259	1.1967e-17	16.6522	1.91649	Scavenger receptor class F member 2	0.7229		unknown
CGI_10005140	1.57415	1.07824e-05	422.128	3.58993	8.62376e-48	369.608	0.558158	0.00651776	566.578	1.90741	UPF0676 -like	0.6455		GO:0016491;GO:0046872;GO:0055114
CGI_10017551	1.23412	9.98842e-07	198.094	2.52158	1.64953e-33	170.99	1.89743	7.02881e-20	181.169	1.88438	microfibril-associated glyco 4-like	0.737		unknown
CGI_10001631	2.42262	4.49265e-25	55.6876	2.68299	1.47004e-31	56.531	0.545807	9.73946e-05	82.0423	1.8838	multiple epidermal growth factor-like domains 10	0.7684		unknown
CGI_10009205	1.64592	0.000661284	2.76793	1.88659	0.000126553	2.76749	2.09546	1.7971e-05	2.56407	1.87599	hypothetical protein CGI_10009205	0.5757		unknown
CGI_10025980	1.75152	1.59084e-24	247.082	1.72196	6.02562e-17	257.51	2.12181	9.41464e-22	237.65	1.86509	PREDICTED: uncharacterized protein LOC105345659 [Crassostrea gigas]	0.6114		GO:0016021
CGI_10003472	1.60589	3.88384e-52	168.566	0.8944	5.77618e-08	202.768	3.08363	7.32737e-123	144.768	1.86131	multiple epidermal growth factor-like domains 10	0.7005		GO:0016021
CGI_10005741	1.44817	4.2705e-12	48.8172	2.29499	4.47959e-28	44.7306	1.83798	5.65139e-21	46.7217	1.86038	A disintegrin and metallo ase with thrombospondin motifs 18	0.5795		GO:0007229
CGI_10017358	2.32467	3.38689e-07	4.25464	1.16512	0.00786451	5.71832	2.07508	5.3543e-06	4.58681	1.85496	hypothetical protein CGI_10017358	0.7433		unknown
CGI_10004172	1.84236	1.82922e-13	27.6609	2.62009	9.64018e-15	25.6673	1.02433	1.81967e-05	33.1283	1.82893	Scavenger receptor class F member 2	0.819		GO:0016020
CGI_10000378	2.79174	2.61359e-10	5.11569	1.11816	0.00374525	7.28073	1.48021	0.000163495	6.55399	1.7967	hypothetical protein CGI_10000378	0.876		GO:0003676;GO:0008270
CGI_10012080	1.55085	4.40924e-20	78.1787	1.85267	3.85623e-24	77.3046	1.96427	2.68649e-26	74.5114	1.78926	[Trichoplax adhaerens]	0.632		GO:0005524;GO:0004674;GO:0006468
CGI_10024453	1.12373	1.91444e-05	45.8255	1.39132	1.81626e-07	45.154	2.76954	8.47067e-17	36.095	1.76153	hypothetical protein CGI_10024453	0.8329		unknown
CGI_10012628	1.92905	4.51753e-05	3.94795	1.69929	0.000360681	4.42225	1.64361	0.000576977	4.37772	1.75732	Forkhead box H1	0.645		GO:0005634;GO:0003700;GO:0006351;GO:0006355;GO:0043565
CGI_10001023	2.08854	1.34422e-07	8.16601	1.89059	1.82887e-06	8.78863	1.26635	0.00376362	9.55415	1.74849	carbohydrate sulfotransferase 15-like	0.5725		GO:0016020;GO:0008152;GO:0008146
CGI_10027485	2.87133	4.54439e-43	134.091	1.44935	2.84073e-14	168.058	0.877477	6.23937e-07	187.071	1.73272	hypothetical protein CGI_10027485	0.694		unknown
CGI_10014762	2.06284	1.33887e-05	3.24433	1.56746	0.00151461	3.77703	1.54664	0.00193855	3.67894	1.72564	Neuronal acetylcholine receptor subunit alpha-6	0.7615		GO:0034220;GO:0016021;GO:0005230
CGI_10014014	2.51788	4.77447e-65	99.2584	1.76764	5.15515e-48	114.061	0.883625	5.76779e-12	133.434	1.72305	DIS3-like exonuclease 1	0.7515		GO:0090503;GO:0000175;GO:0016020;GO:0016075
CGI_10015983	1.54269	0.00166228	2.04729	1.82865	0.000233198	2.02847	1.78359	0.000324434	2.00235	1.71831	Proton myo-inositol cotransporter	0.7805		GO:0022857;GO:0016020;GO:0006810
CGI_10021457	1.74388	0.00019158	3.19753	1.06358	0.0227273	4.03096	2.34679	1.04037e-06	2.91149	1.71808	IMPACT	0.8335		GO:0006749;GO:0003840
CGI_10002423	1.07899	0.00033378	92.4398	1.65214	9.60355e-15	87.121	2.36352	4.38214e-20	76.8155	1.69822	multiple epidermal growth factor-like domains 10	0.5985		GO:0003824;GO:0006796
CGI_10005104	1.70508	1.90864e-05	7.26173	1.55274	6.08291e-05	7.90105	1.83652	4.34795e-06	7.3388	1.69811	3-demethylubiquinone-9 3-methyltransferase [Crassostrea gigas]	0.9567		unknown
CGI_10012710	2.93603	2.52007e-51	124.726	1.72926	5.9703e-36	150.128	0.403962	0.0389742	199.045	1.68975	Nucleolar 16	0.75		GO:0016020
CGI_10007475	1.32545	6.37405e-06	18.0836	1.45644	9.00931e-07	18.36	2.18553	8.69784e-13	16.0107	1.65581	---NA---	0		unknown
CGI_10021382	1.29658	0.000294969	11.4727	2.67386	1.49384e-11	9.61359	0.986992	0.00479297	12.6137	1.65248	alpha-(1,3)-fucosyltransferase C-like [Lingula anatina]	0.6635		GO:0008417;GO:0032580;GO:0036065;GO:0016021;GO:0006486
CGI_10012794	1.2206	0.000217005	12.054	1.59766	1.85255e-06	11.6375	2.12804	1.96601e-09	10.4403	1.64877	talin-1-like isoform X1 [Crassostrea gigas]	0.952		GO:0051015;GO:0005856;GO:0005925;GO:0001726;GO:0016021;GO:0005200;GO:0007155;GO:0005158;GO:0007016
CGI_10016156	2.21237	1.19825e-09	13.9739	1.07876	0.000977069	18.0971	1.63227	2.80842e-07	15.8687	1.64113	hypothetical protein CGI_10016156	0.6665		unknown
CGI_10024196	1.14576	0.00323869	6.905	1.72178	1.29134e-05	6.37175	2.04718	6.38183e-07	5.87612	1.63824	hypothetical protein CGI_10024196	1		unknown
CGI_10014358	2.53327	5.48009e-19	22.6227	0.78836	0.000358264	32.281	1.58915	1.09717e-11	26.5574	1.63693	epidermal growth factor 6 isoform X1	0.714		GO:0005509;GO:0016021;GO:0005201;GO:0005578;GO:0009987
CGI_10006247	2.08143	5.61637e-12	28.5177	1.44803	1.26221e-06	33.0789	1.36323	1.27228e-05	32.7854	1.63089	calmodulin variant 1	0.8735		GO:0043548;GO:0010880;GO:0043388;GO:0030426;GO:0051343;GO:0034704;GO:0070062;GO:0000086;GO:0030801;GO:0072542;GO:0005509;GO:0043274;GO:0032465;GO:0031432;GO:0031996;GO:0031997;GO:0050998;GO:0019901;GO:0019904;GO:0008076;GO:0000922;GO:0048306;GO:0060316;GO:0008179;GO:0044325;GO:0021762;GO:0005634;GO:0005876;GO:0002027;GO:0005513;GO:0005813;GO:0031800;GO:0032516;GO:0030235;GO:0055117;GO:0030017
CGI_10018698	0.821508	0.0294281	10.3549	1.41982	7.73599e-05	9.39817	2.64676	1.69611e-10	7.5072	1.62936	cytochrome P450 2J2-like isoform X2	0.679		GO:0005506;GO:0016705;GO:0055114;GO:0004497;GO:0020037
CGI_10019816	1.4489	0.000130147	9.20393	2.58324	9.10886e-09	7.82202	0.833996	0.0367293	10.9035	1.62205	PREDICTED: uncharacterized protein LOC105338148	0.7123		unknown
CGI_10014668	1.2785	9.18821e-05	11.263	1.47145	3.90024e-06	11.3211	2.10921	3.67072e-09	9.92665	1.61972	hypothetical protein CGI_10014668	1		unknown
CGI_10020706	1.82546	1.75324e-11	21.682	1.64684	2.07549e-10	23.2868	1.35709	4.06427e-08	24.2309	1.6098	hypothetical protein CGI_10020706	1		GO:0016021
CGI_10002777	1.66788	0.000356782	3.4686	1.3813	0.0038952	3.88934	1.77971	0.00014428	3.53549	1.60963	5-hydroxytryptamine receptor 1B	0.48		GO:0004930;GO:0010033;GO:0007186;GO:0009719;GO:0016021;GO:0044464;GO:0048523;GO:0005488
CGI_10001481	1.04724	4.76175e-07	33.1419	1.59986	6.88973e-10	30.5164	2.16997	1.324e-17	27.5486	1.60569	hypothetical protein CGI_10001481	1		GO:0016021
CGI_10004116	1.80269	4.80573e-05	10.0964	1.13646	0.0124122	12.2191	1.85915	4.19274e-05	10.235	1.59943	hypothetical protein CGI_10004116	0.6689		unknown
CGI_10001366	1.10104	0.0229819	133.923	2.25182	2.59014e-07	117.978	1.42831	0.00185684	129.948	1.59372	hypothetical protein CGI_10001366	0.906		unknown
CGI_10009574	0.915054	5.37243e-07	56.7602	2.11992	3.84376e-24	47.1601	1.72177	7.49611e-14	48.7741	1.58558	S-crystallin SL11	0.637		GO:0016740
CGI_10016520	1.63771	1.25627e-12	56.1522	1.52973	1.37797e-11	59.6349	1.58077	1.51522e-12	57.952	1.58274	Phosphatidylinositol-glycan biosynthesis class F	0.712		GO:0005789;GO:0006506;GO:0016021
CGI_10017245	1.90035	1.30253e-07	12.9431	1.34728	1.11372e-05	15.1803	1.49833	5.0742e-06	14.3448	1.58199	Threonine synthase-like 1	0.6655		GO:0016020
CGI_10009203	1.64201	3.23968e-20	361.948	1.32856	1.80553e-10	397.701	1.77416	2.4731e-26	362.04	1.58158	afadin- and alpha-actinin-binding -like	0.7565		unknown
CGI_10015623	1.2565	0.000130977	11.1947	1.64122	5.94247e-07	10.79	1.82951	2.27621e-07	10.1596	1.57574	Mannose-binding A	0.916		GO:0005524;GO:0016021;GO:0008137;GO:0004828;GO:0042773;GO:0016301;GO:0005743;GO:0006434
CGI_10018699	0.791349	0.0237529	12.4493	1.49202	1.56868e-05	10.9747	2.43577	2.93902e-10	9.25111	1.57305	cytochrome P450 2C14-like isoform X2 [Crassostrea gigas]	0.6555		GO:0005506;GO:0016705;GO:0055114;GO:0004497;GO:0020037
CGI_10005785	1.90132	5.40628e-12	18.2241	2.08241	4.27805e-14	18.5674	0.69928	0.00523781	24.1608	1.56101	EGF and Hyalin and GCC2 GCC3 domain containing	0.6835		GO:0016021
CGI_10018285	1.21199	1.2965e-09	43.137	0.859936	2.06042e-05	48.6996	2.59464	3.81424e-26	35.5773	1.55552	hypothetical protein CGI_10018285	1		unknown
CGI_10016335	0.818366	0.00298599	18.9806	2.0708	3.83756e-12	15.3724	1.76128	2.3085e-08	15.758	1.55015	collagen alpha-2(VI) chain-like	1		unknown
CGI_10014899	0.433581	0.0333749	50.4236	1.80511	2.22932e-19	38.4812	2.39562	1.20635e-27	34.8698	1.54477	lisH domain-containing -like	0.8333		GO:0016020
CGI_10013862	2.0228	2.36163e-11	26.0535	1.36191	2.6583e-07	30.6007	1.24166	1.99396e-06	30.7626	1.54212	short-chain collagen C4-like	0.9045		GO:0008270;GO:0005581;GO:0016021;GO:0005622
CGI_10010620	2.52597	6.43705e-11	8.06497	0.754988	0.0206997	11.9601	1.33798	5.90742e-05	10.0906	1.53965	Glyco 3-alpha-L-fucosyltransferase A	0.6765		GO:0008417;GO:0032580;GO:0036065;GO:0016021;GO:0006486
CGI_10003389	1.53018	6.48162e-05	7.76123	1.89783	2.8634e-06	7.54369	1.16845	0.00259313	8.63155	1.53215	hypothetical protein CGI_10003389	0.965		unknown
CGI_10021848	1.64689	0.000647247	1.66934	1.34456	0.00916326	1.9958	1.59991	0.00145778	1.77897	1.53045	Tubulin polymerization-promoting family member 2	0.6235		unknown
CGI_10018319	1.2721	0.0087612	3.21059	1.3479	0.00472852	3.38038	1.96537	4.82212e-05	2.82166	1.52846	hypothetical protein CGI_10018319	0.97		unknown
CGI_10022593	0.500803	1.47435e-05	640.431	2.07621	8.75882e-102	482.407	2.00324	1.93341e-69	477.42	1.52675	carboxypeptidase B-like	0.6705		GO:0008061;GO:0008270;GO:0004181;GO:0006030;GO:0006508;GO:0005576
CGI_10022138	0.961718	2.07827e-05	35.935	0.742475	8.02244e-05	39.6946	2.84366	1.45286e-28	27.3448	1.51595	hypothetical protein CGI_10022138	0.725		GO:0003677;GO:0090305;GO:0004518
CGI_10023800	3.22308	1.34147e-33	166.217	0.534009	0.0490835	267.057	0.764299	9.9035e-08	247.62	1.50713	hypothetical protein CGI_10023800	0.7675		unknown
CGI_10025582	2.07323	1.30205e-35	224.134	1.89284	2.52321e-24	238.935	0.534877	0.0144689	313.427	1.50031	multiple epidermal growth factor-like domains 10	0.8025		unknown
CGI_10001746	0.937618	2.23808e-15	295.03	2.07274	1.177e-41	248.508	1.49056	8.70945e-26	267.448	1.5003	cell adhesion molecule 3-like isoform X2	0.6315		GO:0016021
CGI_10007102	1.16185	0.00701584	5.3538	1.3828	0.00165758	5.26794	1.94728	1.98679e-05	4.55143	1.49731	ribonuclease kappa-A-like	0.685		GO:0090502;GO:0016021;GO:0009303;GO:0004521
CGI_10000785	1.42915	4.75768e-11	36.0416	2.38858	2.66405e-21	32.355	0.673848	0.00487459	43.7353	1.49719	polypeptide N-acetylgalactosaminyltransferase 5-like	0.8555		GO:0008270;GO:0016757;GO:0016021;GO:0006486;GO:0000139;GO:0030246
CGI_10001061	1.43951	1.17612e-06	22.0954	2.07877	9.82295e-14	20.8735	0.966991	0.000159471	25.3934	1.49509	apolipo L3-like	0.7727		GO:0006869;GO:0016021;GO:0008289;GO:0042157;GO:0005576
CGI_10019845	1.41842	0.00313962	1.59638	1.54814	0.00182606	1.66057	1.5148	0.00219609	1.62863	1.49378	Collagen alpha-5(VI) chain	0.8355		GO:0005581;GO:0005509;GO:0016021;GO:0007156
CGI_10021061	1.93048	1.02502e-25	46.9659	1.48476	1.28555e-18	52.7672	1.05302	1.23758e-07	56.3829	1.48942	hypothetical protein CGI_10021061	0.644		unknown
CGI_10011840	2.62523	1.94201e-96	130.172	1.21383	4.74485e-25	166.871	0.614698	1.63772e-11	189.626	1.48459	neuronal acetylcholine receptor subunit alpha-6-like	0.7205		GO:0034220;GO:0016021;GO:0005230
CGI_10003431	0.435946	0.0142189	2847.97	1.85574	2.19577e-89	2177.69	2.13185	4.11454e-39	2042.31	1.47451	[Nematostella vectensis]	0.5425		GO:0016020
CGI_10023119	1.20335	8.19793e-10	60.3654	1.75232	4.40529e-16	56.6744	1.46585	6.34321e-13	58.4146	1.47384	kelch 3	0.814		unknown
CGI_10013667	1.44217	4.38978e-37	226.643	1.50019	4.50064e-40	233.318	1.46972	5.61398e-39	230.096	1.47069	Replication factor C subunit 3	0.883		GO:0003689;GO:0006261;GO:0046683;GO:0005663
CGI_10028382	1.88517	3.54543e-07	14.9328	1.59342	6.34332e-06	16.5348	0.931272	0.00537408	18.879	1.46995	NADH dehydrogenase [ubiquinone] iron-sulfur mitochondrial	0.7075		GO:0016021
CGI_10019037	1.70422	0.000162681	4.33449	1.54916	0.00074664	4.68743	1.14321	0.0148618	5.05545	1.46553	partial [Nematostella vectensis]	0.448		unknown
CGI_10010557	1.54367	8.17934e-05	8.40628	0.91548	0.010003	10.3175	1.93722	1.60294e-06	8.02655	1.46546	zonadhesin-like isoform X3	0.529		unknown
CGI_10017853	0.831222	3.22921e-05	72.6733	1.8373	6.02562e-17	61.487	1.71771	2.3239e-18	61.6974	1.46208	Multiple epidermal growth factor-like domains 10	0.5805		unknown
CGI_10014021	0.667	0.00790499	117.731	1.36488	1.30036e-08	103.697	2.31125	3.70978e-20	87.6445	1.44771	angiopoietin-2-like isoform X1	0.819		GO:0005216;GO:0034220;GO:0016021
CGI_10014057	1.00274	1.21874e-05	64.5831	1.51858	1.11185e-07	59.6685	1.80261	1.00185e-14	56.3029	1.44131	atrial natriuretic peptide receptor 1-like	0.658		GO:0005524;GO:0006182;GO:0016021;GO:0004383;GO:0042562;GO:0004672;GO:0007166;GO:0043234;GO:0006468;GO:0008217;GO:0005622;GO:0035556
CGI_10002832	2.29287	1.11721e-17	67.5524	1.47486	9.88877e-21	80.9339	0.53586	0.000327294	99.1382	1.43453	hypothetical protein CGI_10002832	0.8629		unknown
CGI_10002496	1.20414	0.0166038	2.41424	1.49173	0.00333343	2.32756	1.60091	0.00143992	2.22082	1.43226	hypothetical protein CGI_10002496	0.761		unknown
CGI_10021807	1.77133	1.25721e-10	52.5083	1.58239	9.0881e-12	56.9736	0.94283	0.000400601	63.6793	1.43218	multiple epidermal growth factor-like domains 10	0.658		GO:0016021
CGI_10003692	1.3513	3.10221e-11	640.487	0.674021	8.7813e-05	785.576	2.26643	6.0488e-35	568.591	1.43059	[Nematostella vectensis]	0.6575		GO:0016020;GO:0008237
CGI_10006211	1.75436	1.0377e-05	6.65336	1.47599	0.000100897	7.40428	1.05501	0.0055321	8.01265	1.42845	chitotriosidase-1 isoform X1	0.637		GO:0005975;GO:0005615;GO:0008061;GO:0006032;GO:0008843;GO:0050896
CGI_10020888	1.69699	2.64358e-16	75.1555	0.505935	0.00126168	102.935	2.05892	2.39119e-33	73.0667	1.42062	receptor-type tyrosine- phosphatase epsilon-like	0.7		GO:0004725;GO:0016020;GO:0035335
CGI_10014653	1.66108	4.36144e-62	178.933	1.44599	9.83948e-54	193.338	1.13618	7.2828e-34	202.019	1.41442	methylmalonic aciduria and homocystinuria type C homolog	0.7305		unknown
CGI_10004206	1.15144	0.000207878	21.4622	2.45893	1.34034e-11	17.8419	0.632753	0.0389738	25.2351	1.41437	Mediator of RNA polymerase II transcription subunit 23	0.814		GO:0016021
CGI_10001409	0.430582	1.87749e-05	845.327	3.38979	3.40178e-39	544.285	0.418536	0.00251011	865.069	1.41297	Receptor-type tyrosine- phosphatase zeta	0.6605		GO:0004725;GO:0035335
CGI_10026152	1.84429	0.000113724	3.21798	1.26536	0.0108915	4.17083	1.12187	0.0285235	4.16631	1.41051	Apoptosis inhibitor IAP	0.6895		unknown
CGI_10002618	1.59382	4.42362e-05	7.39653	1.47274	7.23369e-05	8.01805	1.13712	0.0017362	8.43022	1.40122	hypothetical protein CGI_10002618	0.6975		unknown
CGI_10014958	1.66696	5.89352e-172	5591.04	1.15363	7.73917e-68	6412.75	1.37056	1.1341e-102	6015.48	1.39705	Thioredoxin domain-containing 3	0.9425		GO:0005623;GO:0006228;GO:0006241;GO:0006183;GO:0006165;GO:0007155;GO:0045454;GO:0004550;GO:0030246
CGI_10011271	1.18997	2.12702e-18	353.194	1.26944	1.11429e-19	361.605	1.72818	4.51292e-34	325.823	1.39586	phytanoyl- peroxisomal-like	0.798		unknown
CGI_10016900	0.590007	0.00669061	331.235	1.62521	4.1972e-15	272.723	1.95309	1.67138e-20	253.732	1.38943	hypothetical protein CGI_10016900	0.8585		GO:0008270
CGI_10025138	2.15441	5.5106e-21	43.3123	1.46885	6.02679e-11	50.3095	0.530362	0.00745005	61.9517	1.38454	hypothetical protein CGI_10025138	1		GO:0016021
CGI_10027973	1.68857	1.08615e-13	43.1642	1.29733	5.68986e-09	48.368	1.16023	5.1801e-08	48.9514	1.38204	Target of EGR1 1	0.702		GO:0003676;GO:0005634
CGI_10006040	0.782754	0.00558544	154.992	2.49339	7.59933e-32	120.607	0.862087	3.81908e-05	156.153	1.37941	N-acetylated-alpha-linked acidic dipeptidase	0.6775		GO:0016021
CGI_10027683	0.720272	0.0335959	15.8707	1.63907	5.37308e-06	13.2516	1.76343	1.1698e-06	12.7249	1.37426	per-hexamer repeat 5	1		unknown
CGI_10025440	2.034	7.41806e-13	62.5148	1.11889	7.33712e-06	77.4516	0.946702	0.0013647	78.5829	1.36653	hypothetical protein CGI_10025440	0.8925		GO:0016021
CGI_10027011	1.47155	0.00137105	4.88781	1.67785	0.000276578	4.94044	0.940649	0.0497702	5.77947	1.36335	Programmed cell death 2- partial	0.66		GO:0005737
CGI_10002194	1.28518	7.24489e-05	18.8255	1.44898	6.57937e-06	18.9857	1.35531	4.8682e-05	18.943	1.36316	[Laccaria bicolor S238N-H82]	0.6465		GO:0016021
CGI_10025334	1.22676	1.77893e-08	31.805	2.12507	3.3528e-19	28.4263	0.727472	0.00055912	36.7144	1.35977	hypothetical protein CGI_10025334	0.86		GO:0003677;GO:0090305;GO:0004518
CGI_10008039	1.61659	1.25504e-07	20.1828	1.04419	8.18487e-05	23.9632	1.3724	7.8607e-07	21.8105	1.34439	Multiple epidermal growth factor-like domains 8	0.8914		GO:0016021
CGI_10014119	1.48083	0.000310301	8.34216	0.90342	0.0326694	10.0926	1.58693	0.000237874	8.31286	1.32373	Ferric-chelate reductase 1	0.576		unknown
CGI_10006959	1.04052	4.15774e-05	19.3018	2.11494	1.99997e-12	16.3245	0.815431	0.000665627	20.8711	1.32363	ficolin-2- partial	0.8895		GO:0003677;GO:0003713;GO:0016021;GO:0006355
CGI_10014989	1.09591	3.49044e-05	21.2507	1.30195	2.33196e-06	21.1464	1.57007	8.2758e-09	19.6651	1.32264	CG4362 [Drosophila melanogaster]	0.575		GO:0019028
CGI_10006812	1.1415	0.022284	2.55	1.6009	0.00134479	2.35382	1.21649	0.0159891	2.58711	1.31963	coadhesin- partial	0.5885		GO:0008061;GO:0006030;GO:0016021;GO:0005576
CGI_10023465	0.670927	9.72424e-05	3813.12	1.64392	3.43155e-39	3218.91	1.6305	1.13056e-25	3154.12	1.31511	multiple epidermal growth factor-like domains 10	0.764		unknown
CGI_10019038	1.35264	5.77681e-09	54.9263	1.46678	1.51003e-10	55.8926	1.11535	2.37384e-05	58.6201	1.31159	hypothetical protein CGI_10019038	0.9567		GO:0016021
CGI_10013103	1.08238	1.42444e-07	107.715	1.34559	3.38656e-11	105.958	1.49868	1.89159e-13	100.902	1.30888	DNA polymerase theta	0.755		GO:0003677;GO:0005524;GO:0003887;GO:0006261;GO:0071897
CGI_10000502	0.869553	0.00013474	308.859	1.51687	6.8569e-13	280.018	1.53474	1.16836e-12	273.521	1.30705	huntingtin-interacting 1-related - partial	0.9325		GO:0043065;GO:0042981
CGI_10020600	0.926977	5.57511e-05	33.4711	1.90901	6.55335e-14	28.6242	1.08239	9.59522e-07	32.9295	1.30612	PREDICTED: uncharacterized protein LOC105319064 isoform X2	1		unknown
CGI_10016606	1.37715	0.000794765	6.16867	0.924244	0.0281198	7.26506	1.60765	0.000160408	5.99016	1.30301	hypothetical protein CGI_10016606	0.68		GO:0003677
CGI_10007281	2.2163	2.486e-21	99.6674	0.958732	1.52112e-07	130.975	0.715598	8.44645e-09	137.049	1.29688	calcium calmodulin-dependent kinase type IV-like	0.66		GO:0005524;GO:0004674;GO:0006468
CGI_10017830	0.347671	2.06156e-05	1330.26	2.36295	3.5844e-45	917.893	1.17451	3.83041e-07	1079.9	1.29504	insulin-degrading enzyme isoform X1	0.715		GO:0005777;GO:0005515;GO:0043171;GO:0070013;GO:0046872;GO:0030163;GO:0006508;GO:0004222
CGI_10016787	1.61028	5.99709e-34	145.409	1.44439	8.12241e-34	156.007	0.830074	5.14388e-15	175.143	1.29491	multiple epidermal growth factor-like domains 10	0.7375		GO:0016020
CGI_10003908	2.54607	2.00229e-13	15.1052	0.598633	0.0199438	23.1433	0.709118	0.00706654	21.9869	1.28461	estrogen sulfotransferase-like	0.645		GO:0008152;GO:0008146
CGI_10016226	1.54993	0.00153376	2.05358	1.03847	0.0489146	2.61104	1.26328	0.0148932	2.26855	1.28389	hypothetical protein CGI_10016226	0.755		unknown
CGI_10000671	1.66384	2.10328e-19	45.5432	1.46511	2.67508e-16	49.0159	0.713884	1.02918e-05	57.2879	1.28095	homeobox Wariai-like	0.8775		unknown
CGI_10003061	1.40028	7.83735e-18	504.566	1.09744	1.5748e-09	558.664	1.34256	3.28871e-17	521.098	1.28009	hypothetical protein CGI_10003061	0.7567		unknown
CGI_10018489	1.28914	1.33748e-12	193.876	1.16072	4.2996e-11	207.594	1.37461	1.79343e-14	194.725	1.27483	HAUS augmin-like complex subunit 4	0.6225		unknown
CGI_10024460	1.2693	1.11553e-44	685.338	1.37846	1.19231e-30	696.626	1.14456	2.03588e-09	712.037	1.26411	multiple epidermal growth factor-like domains 10	0.603		GO:0016020;GO:0016310;GO:0016301
CGI_10019486	1.69422	4.67597e-23	150.465	1.39604	5.1467e-29	165.958	0.698758	9.25045e-10	191.018	1.26301	conserved oligomeric Golgi complex subunit 8-like	0.8783		unknown
CGI_10008428	1.62284	2.07069e-15	224.447	1.26838	6.45945e-07	248.35	0.88865	0.0259012	258.846	1.25995	hypothetical protein CGI_10008428	1		unknown
CGI_10001259	0.742012	0.0253154	12.5899	1.65351	1.05738e-06	10.5934	1.35804	2.02574e-05	11.0638	1.25119	hypothetical protein CGI_10001259	0.9067		unknown
CGI_10009198	1.44318	7.50952e-07	40.3894	1.54924	1.39729e-07	41.269	0.753928	0.015954	48.4492	1.24878	peptidoglycan-binding [Herpetosiphon geysericola]	0.6755		GO:0008152;GO:0016787
CGI_10006446	1.79361	4.63949e-17	39.2598	1.26405	5.46483e-10	45.2167	0.667578	0.000387974	51.2771	1.24175	Three prime repair exonuclease 1	0.773		GO:0016788;GO:0043170;GO:0097159;GO:1901363;GO:0016829;GO:0044763;GO:0006139;GO:0006796
CGI_10002879	0.626752	0.0205152	2226.69	1.68394	1.80767e-16	1844.39	1.38649	1.22597e-12	1910.65	1.23239	myb X isoform X1 [Crassostrea gigas]	0.98		unknown
CGI_10000882	1.35541	4.40968e-19	106.288	0.880805	4.30761e-14	123.206	1.45282	4.27169e-25	106.55	1.22968	hypothetical protein CGI_10000882	1		GO:0016021
CGI_10013944	1.24081	5.76673e-07	19.2442	1.09597	7.55997e-06	20.7195	1.32654	1.05116e-07	19.2869	1.22111	potassium voltage-gated channel Shaw-like [Lingula anatina]	0.6195		GO:0005249;GO:0071805;GO:0008076
CGI_10006877	0.871191	0.00147768	153.469	1.31603	1.58606e-05	143.174	1.46514	3.62524e-08	137.416	1.21745	hypothetical protein CGI_10006877	1		unknown
CGI_10027947	1.73354	1.2681e-29	124.826	1.47056	2.24813e-17	135.685	0.437596	0.0194749	170.953	1.2139	Multiple epidermal growth factor-like domains 10	0.6645		GO:0016021
CGI_10019336	2.31607	5.24824e-14	19.6178	0.526935	0.049764	29.5705	0.792821	0.00154188	26.9656	1.21194	SREK1IP1-like [Biomphalaria glabrata]	0.864		GO:0003676;GO:0008270
CGI_10018803	1.27374	1.19709e-22	280.498	1.52014	2.35827e-35	278.727	0.813195	2.60982e-05	316.96	1.20236	hypothetical protein CGI_10018803	1		GO:0016021
CGI_10023451	0.584412	0.00532591	56.9418	1.05028	1.56596e-06	52.3427	1.94675	7.17324e-19	43.4754	1.19382	short-chain collagen C4-like	0.8625		GO:0008270;GO:0005581
CGI_10007911	1.13536	0.023404	1.12832	1.09443	0.0384467	1.24113	1.34856	0.0066651	1.05267	1.19279	hypothetical protein CGI_10007911	0.975		unknown
CGI_10004128	0.988981	1.72675e-15	597.248	2.15398	3.71699e-77	505.98	0.430586	8.46586e-06	708.011	1.19118	cell wall DAN4-like isoform X2	0.7317		unknown
CGI_10003153	1.11235	4.8167e-05	33.0783	1.05321	2.50853e-05	35.2122	1.4068	2.78195e-09	31.9289	1.19078	GPR107-like isoform X3	0.776		GO:0016021
CGI_10020468	1.37796	2.06037e-18	86.4678	0.721272	2.74899e-05	104.603	1.4667	1.29891e-19	86.893	1.18864	Metabotropic glutamate receptor 5	0.499		GO:0004930;GO:0007186;GO:0016021
CGI_10010187	1.40682	4.50768e-07	19.5478	0.768703	0.00360012	23.6923	1.37446	1.4632e-06	20.1188	1.18333	leucine-rich repeat-containing 42-like	0.616		unknown
CGI_10026074	1.82055	2.32648e-07	11.0907	0.723199	0.023761	14.9478	0.987226	0.00206989	13.5521	1.17699	CD97 antigen [Crassostrea gigas]	0.5125		GO:0004930;GO:0007186;GO:0016021;GO:0007166
CGI_10014354	0.363223	0.0268083	73.9264	1.27913	4.70422e-07	59.9489	1.87995	5.05045e-20	53.3819	1.1741	hypothetical protein CGI_10014354	0.7173		unknown
CGI_10004735	1.44627	4.67341e-05	9.59784	1.01258	0.0162096	10.8748	1.03844	0.00439598	10.7614	1.16576	hypothetical protein CGI_10004735	0.8767		unknown
CGI_10001214	0.993101	0.0189154	5.91737	0.952931	0.0237348	6.27663	1.54723	0.00029357	5.28888	1.16442	Heavy metal-binding HIP	0.863		GO:0016021
CGI_10026414	0.935469	0.00267268	17.1044	1.0256	0.00237194	17.2373	1.52368	8.49838e-06	15.181	1.16158	hypothetical protein CGI_10026414	0.9867		unknown
CGI_10002942	1.33743	2.57791e-05	57.4138	1.24448	1.66501e-05	61.5863	0.885012	0.00460061	65.569	1.15564	chorion class high-cysteine HCB 13-like	0.97		GO:0016021
CGI_10024416	1.46906	1.61594e-13	268.725	1.52323	7.55075e-17	277.904	0.463221	0.00215307	351.495	1.15184	hypothetical protein CGI_10024416	0.94		unknown
CGI_10002392	1.3649	2.09447e-11	36.3873	0.77001	0.00151324	43.2034	1.29964	1.30818e-10	37.5802	1.14485	Peroxisomal acyl-coenzyme A oxidase 3	0.869		GO:0003995;GO:0005777;GO:0003997;GO:0006635;GO:0050660;GO:0005739;GO:0016020;GO:0005102
CGI_10025475	0.932971	1.92165e-08	379.925	0.943491	4.98671e-17	395.974	1.53459	3.60512e-42	343.415	1.13702	60 kDa lysophospholipase	0.782		GO:0006520;GO:0004067
CGI_10027667	0.745369	4.44394e-15	204.433	1.60204	3.72391e-16	175.266	1.06142	4.23179e-08	191.719	1.13628	hemicentin-2-like isoform X3 [Crassostrea gigas]	0.5625		GO:0008152;GO:0005488
CGI_10012513	0.477815	0.00070113	678.316	0.2915	0.0374778	747.642	2.63326	1.27825e-47	464.309	1.13419	transmembrane GTPase Marf-like	0.524		GO:0005525
CGI_10012992	1.12204	0.0144854	4.80118	0.935515	0.031279	5.39028	1.34219	0.00294018	4.70763	1.13325	allene oxide synthase-lipoxygenase -like	0.6635		GO:0016702;GO:0046872;GO:0055114
CGI_10012623	1.20177	6.75439e-09	182.888	1.20502	2.98067e-10	190.587	0.977376	4.66981e-07	196.793	1.12806	kinetochore Spc24-like	0.92		unknown
CGI_10003889	0.994523	5.08355e-14	383.344	1.13792	4.33997e-26	386.962	1.2506	7.38164e-16	369.107	1.12768	multiple epidermal growth factor-like domains 10	0.723		GO:0016021;GO:0016310;GO:0016301
CGI_10011614	2.05393	1.19151e-12	16.7846	0.62338	0.0390521	23.6767	0.705144	0.00381736	22.7275	1.12749	Bromodomain and WD repeat-containing 2	0.6965		unknown
CGI_10016008	2.25993	4.18808e-64	439.514	0.732259	2.67655e-09	608.276	0.370121	0.0145967	660.763	1.12077	Histone-lysine N-methyltransferase PRDM9	0.642		GO:0008168;GO:0032259
CGI_10017350	1.07025	0.00271693	643.365	0.936151	0.00662092	697.717	1.35027	0.000302518	614.009	1.11889	hypothetical protein CGI_10017350	0.5545		GO:0016021
CGI_10000557	1.01057	7.86348e-20	177.28	1.41021	8.91705e-32	169.336	0.901942	2.21704e-14	185.631	1.10758	cell wall DAN4-like isoform X2	0.7438		unknown
CGI_10008913	1.80807	2.3641e-11	62.3119	1.07565	3.7507e-05	75.1274	0.40725	0.0493643	88.8869	1.09699	diamine acetyltransferase 2-like	0.7793		GO:0008152;GO:0008080
CGI_10012251	0.77427	0.00513935	33.2208	1.69668	9.68159e-12	28.3919	0.808428	0.000105367	33.7516	1.09313	hypothetical protein CGI_10012251	1		unknown
CGI_10018016	0.898454	0.000747663	63.7595	1.05518	4.39788e-06	64.1204	1.32271	6.14214e-09	59.4156	1.09212	PREDICTED: uncharacterized protein LOC105329183	0.724		unknown
CGI_10024749	0.787426	0.00117551	27.9873	1.06274	9.15386e-07	27.2109	1.41414	7.48287e-09	24.6058	1.0881	Blastula protease 10	0.7315		GO:0008270;GO:0005509;GO:0016020;GO:0006508;GO:0004222
CGI_10005564	1.44175	7.38837e-10	27.6825	0.47841	0.0311873	36.731	1.34285	3.61786e-07	28.8152	1.08767	polyhomeotic partial	0.9		GO:0005634;GO:0008270
CGI_10008177	0.974343	5.46758e-12	583.172	0.841728	3.69139e-10	627.144	1.43057	4.0018e-26	540.256	1.08221	glycine receptor subunit alpha-3 isoform X1	0.6235		GO:0016934;GO:0007154;GO:1902476;GO:0009897;GO:0051260;GO:0045202;GO:0045664;GO:0044700;GO:0043679;GO:0071361;GO:0005887;GO:0071230;GO:0004888;GO:0007417;GO:0071294;GO:0097112;GO:0030054;GO:0016594
CGI_10028419	0.496503	0.000838995	341.921	1.92492	1.31055e-29	261.237	0.814352	1.82878e-17	320.88	1.07859	[Nematostella vectensis]	0.674		unknown
CGI_10003190	1.06383	7.6159e-19	186.346	1.36366	6.11449e-27	182.06	0.801861	1.43564e-10	202.562	1.07645	SAM-dependent methyltransferase	0.5295		unknown
CGI_10014616	0.551075	0.000102705	33530.5	1.65094	5.8122e-36	27281.5	1.02557	3.22207e-16	30298.1	1.07586	Natterin-3 [Crassostrea gigas]	0.6405		GO:0016491;GO:0008152
CGI_10002713	0.644452	0.000998822	40.8544	1.65314	4.71444e-17	33.8798	0.928917	5.78948e-07	38.7248	1.0755	hypothetical protein CGI_10002713	0.98		unknown
CGI_10022109	0.937471	1.36028e-12	372.603	1.79723	1.49668e-49	328.076	0.476213	0.00358763	429.952	1.0703	phosphatidylinositol phosphatase PTPRQ-like	0.8		GO:0004930;GO:0007165;GO:0016020;GO:0006470
CGI_10025128	1.00011	3.9004e-05	12097.4	1.44074	1.23975e-14	11547.6	0.769994	0.000124232	13157.5	1.07028	GMP synthase [glutamine-hydrolyzing]	0.7995		GO:0005524;GO:0003921;GO:0003922;GO:0005829;GO:0016462;GO:0006177
CGI_10022182	1.22146	3.58424e-11	113.667	1.37523	5.84683e-14	114.722	0.610593	6.80095e-08	135.591	1.0691	PREDICTED: uncharacterized protein LOC105342740 isoform X1 [Crassostrea gigas]	0.715		GO:0016021
CGI_10005635	0.993826	0.000966459	14.0535	0.996265	0.000638928	14.6491	1.21473	5.76007e-05	13.5841	1.06827	hypothetical protein CGI_10005635	1		unknown
CGI_10004495	0.919307	0.00264915	15.3198	1.47564	2.62405e-06	14.0408	0.807501	0.0115944	16.0433	1.06748	zinc finger 554-like isoform X1 [Poecilia formosa]	0.7465		GO:0003676
CGI_10022652	1.69916	3.97055e-10	25.552	0.985146	0.000296772	30.7788	0.507475	0.0422746	34.5793	1.06393	Hyaluronan mediated motility receptor	0.8527		GO:0005540
CGI_10021353	1.37094	3.29433e-11	56.5142	1.24457	3.80003e-12	60.7256	0.575894	0.00629768	70.1708	1.0638	cell death abnormality 1-like	0.6715		GO:0016021
CGI_10017301	0.803353	1.06895e-05	221.909	1.46776	8.662e-27	200.272	0.917935	0.000570276	218.132	1.06302	Fibronectin type III domain-containing 1	0.666		GO:0016021
CGI_10017171	1.09049	4.89938e-23	267.53	1.1106	1.09512e-14	276.39	0.945035	1.04441e-18	282.396	1.04871	placenta-specific gene 8 -like	0.5775		unknown
CGI_10004111	1.10167	2.29282e-12	130.842	0.955932	3.6688e-12	141.093	1.07968	2.1447e-14	134.316	1.04576	sequestosome-1-like isoform X1 [Crassostrea gigas]	0.87		unknown
CGI_10011482	1.18145	1.77465e-11	46.9646	1.34992	1.53969e-14	47.1983	0.594149	0.000446861	55.594	1.04184	blood vessel epicardial substance-like	0.588		unknown
CGI_10008917	0.830266	7.29932e-08	481.023	1.12257	2.9265e-20	468.432	1.1665	5.67718e-20	454.719	1.03978	multiple epidermal growth factor-like domains 10	0.731		GO:0016020
CGI_10011333	0.542498	0.00114954	271.357	0.936068	6.98918e-08	253.933	1.63769	1.75515e-24	215.9	1.03875	Prohibitin	0.844		GO:0016020
CGI_10022660	0.852634	0.0347679	7.65423	1.08288	0.00716177	7.47236	1.17872	0.00519639	7.1024	1.03808	[Nematostella vectensis]	0.5575		unknown
CGI_10010005	2.07144	5.8024e-20	36.7838	0.503215	0.033208	53.3904	0.532683	0.00896983	51.9831	1.03578	hypothetical protein CGI_10010005	0.94		GO:0016021
CGI_10011264	1.06678	2.70223e-12	114.191	0.940574	7.31909e-09	122.399	1.08118	1.03229e-11	116.274	1.02951	Multiple epidermal growth factor-like domains 10	0.567		unknown
CGI_10020684	1.57008	8.27241e-13	27.824	1.03957	1.36112e-07	32.4181	0.445545	0.0199879	37.3082	1.0184	F-box and leucine-rich repeat 7	0.5495		GO:0016310;GO:0016301
CGI_10006494	1.14641	3.64779e-16	298.471	1.19191	3.52382e-20	307.972	0.714175	2.84572e-05	337.745	1.0175	BTB POZ domain-containing 6-like	0.587		unknown
CGI_10014496	1.15456	8.72834e-14	71.6646	0.705363	1.40436e-06	83.4078	1.19095	3.71946e-16	72.6039	1.01696	cholecystokinin receptor-like [Crassostrea gigas]	0.5845		GO:0004930;GO:0007186;GO:0016021
CGI_10002422	0.739887	0.023947	15.3886	0.768585	0.0231128	15.9526	1.53693	1.07736e-06	13.0561	1.01513	PREDICTED: uncharacterized protein LOC105336587	1		unknown
CGI_10017550	0.732272	0.000145325	73.1277	1.24275	9.98767e-14	67.5036	1.06793	7.70363e-12	68.8565	1.01432	histone acetyltransferase KAT7-like	0.8585		GO:0005634;GO:0004402;GO:0003700;GO:0008270;GO:0006355;GO:0016573
CGI_10021661	0.774585	0.000527467	31.5574	1.21853	4.72211e-08	29.4772	1.04835	3.07106e-06	29.9825	1.01382	AP-4 complex subunit epsilon-1-like	0.98		GO:0030117;GO:0016192;GO:0009166;GO:0009116;GO:0004850;GO:0006886
CGI_10025099	1.16704	4.26101e-09	172.332	0.551137	0.00453275	210.202	1.30452	4.23464e-10	170.771	1.00757	cell death abnormality 1-like	0.7105		GO:0016310;GO:0016301
CGI_10026684	1.39807	1.12517e-26	335.881	1.10275	1.19625e-14	371.495	0.506541	0.000570898	424.707	1.00245	Cys-loop ligand-gated ionic channel	1		GO:0034220;GO:0016021;GO:0005230
CGI_10015671	1.71013	1.76605e-21	48.8258	0.890131	1.65525e-06	60.2338	0.403544	0.0110317	67.7768	1.00127	hypothetical protein CGI_10015671	0.714		GO:0016021
CGI_10008095	1.11343	0.00344481	15.29	0.966992	0.00166191	16.9423	0.923155	0.00368172	16.7199	1.00119	hypothetical protein CGI_10008095	0.835		unknown
CGI_10026974	1.12338	2.61296e-05	20.9606	0.611986	0.0487371	24.8052	1.25571	5.34197e-06	20.7186	0.997028	U3 small nucleolar RNA-associated 25-like	0.96		unknown
CGI_10024762	1.12215	3.05182e-07	63.4025	1.15145	1.26502e-09	65.7521	0.714316	1.49854e-05	72.046	0.995973	Phosphatidylinositol-binding clathrin assembly	0.8156		GO:0098793;GO:0048268;GO:0048488;GO:0005829;GO:0030276;GO:0030136;GO:0005545;GO:0007269
CGI_10021823	1.1603	6.52782e-13	109.357	1.32026	9.16607e-16	110.184	0.499844	0.00135597	132.312	0.993468	PREDICTED: uncharacterized protein C7orf50 homolog [Crassostrea gigas]	0.708		unknown
CGI_10028012	0.648509	0.0120369	101.637	1.87869	4.31323e-15	81.6296	0.452131	0.0379699	110.489	0.993109	calmodulin-like [Crassostrea gigas]	0.7435		GO:0005509
CGI_10003620	1.16599	1.68959e-35	334.654	0.797165	5.09336e-16	379.939	0.98403	5.23633e-27	355.957	0.982395	glycine-rich domain-containing 2-like [Biomphalaria glabrata]	0.5935		unknown
CGI_10014940	1.41623	6.24103e-60	258.842	1.16927	1.99564e-33	282.853	0.352364	1.62518e-06	342.838	0.979287	PREDICTED: uncharacterized protein LOC105336621	0.8967		unknown
CGI_10000215	0.772812	0.000931205	41.2557	1.14662	2.14776e-08	39.3256	1.01483	1.3489e-05	39.7056	0.978087	WD repeat-containing 74	0.7255		GO:0042273;GO:0005730;GO:0030687
CGI_10023040	0.887848	7.22865e-07	186.575	1.13848	9.02705e-13	183.391	0.896179	6.11286e-12	190.683	0.97417	piggyBac transposable element-derived 4-like	1		unknown
CGI_10027409	0.795315	9.58979e-18	198.969	1.35235	6.0922e-40	182.517	0.774229	1.09729e-13	203.922	0.973964	bombesin receptor-activated C6orf89 homolog	0.541		GO:0016021
CGI_10028098	0.621045	0.000137774	817.164	1.32184	1.09411e-20	720.706	0.978387	1.88171e-11	761.396	0.973759	hypothetical protein CGI_10028098	1		unknown
CGI_10023757	0.791393	2.55277e-14	312.337	1.30164	1.14033e-43	289.265	0.820886	2.94916e-16	315.983	0.971306	MORC family CW-type zinc finger 3	0.744		GO:0008270
CGI_10020830	1.16597	1.32891e-13	106.896	0.729175	9.14955e-11	124.106	1.00783	6.06917e-16	113.449	0.967659	probable caffeoyl- O-methyltransferase 1	0.6486		GO:0008168
CGI_10010015	1.44812	6.1025e-44	205.679	1.01714	4.22967e-16	233.571	0.431962	0.00031623	267.745	0.96574	gamma-glutamyltransferase isoform X3 [Alligator mississippiensis]	0.754		GO:0006749;GO:0003840
CGI_10025201	0.621942	1.1809e-07	178.49	1.18842	3.1893e-26	161.87	1.05704	1.09485e-20	163.277	0.955801	transmembrane anterior posterior transformation 1 homolog	0.7575		GO:0001701;GO:0009791;GO:0016021;GO:0048706
CGI_10008495	1.17617	9.86394e-09	35.4623	0.705418	0.00392429	41.3255	0.982695	2.98152e-06	37.805	0.954762	turtle homolog B-like isoform X2	0.6065		unknown
CGI_10016465	1.26826	1.71964e-12	546.096	1.1504	3.93272e-14	584.94	0.441384	0.00517281	689.187	0.953349	receptor-type tyrosine- phosphatase epsilon-like	0.7245		GO:0004725;GO:0035335
CGI_10015294	0.678866	0.000498437	37.1375	1.0511	4.60206e-08	35.1382	1.12411	6.42605e-09	33.8993	0.951356	dual specificity phosphatase 3-like [Crassostrea gigas]	0.7255		GO:0004725;GO:0035335;GO:0008138
CGI_10006091	0.575928	0.0142086	41.3663	1.35448	2.36989e-12	35.7796	0.92069	1.74335e-06	38.5448	0.950366	DNA polymerase III polC-type	0.637		unknown
CGI_10023331	0.730723	0.000850327	29.2343	1.32026	5.39182e-10	26.4397	0.794313	9.26941e-05	29.2683	0.948434	U2 small nuclear ribonucleo auxiliary factor 35 kDa subunit-related 2-like	0.9775		GO:0000166;GO:0089701;GO:0003723;GO:0030529;GO:0046872;GO:0019013;GO:0000398
CGI_10009728	0.721816	2.59212e-05	84.3354	0.988916	3.17284e-14	82.5013	1.10788	4.82196e-13	78.6531	0.939538	multiple epidermal growth factor-like domains 10	0.8475		GO:0004725;GO:0016021;GO:0016310;GO:0016301;GO:0035335
CGI_10026658	1.00998	3.80534e-05	284.542	0.833934	0.000412875	310.36	0.967788	5.74207e-05	294.021	0.937234	Transmembrane 2	0.5715		GO:0016021
CGI_10003186	1.4127	1.61248e-15	139.415	0.675047	8.40066e-09	172.986	0.713779	4.58297e-07	167.763	0.933842	Vacuolar sorting-associated 4B	0.8585		GO:0005634;GO:0005524;GO:0048471;GO:1903774;GO:0016021;GO:0016197;GO:0031122;GO:0061738;GO:0018149;GO:0036258;GO:0008568
CGI_10014538	0.853769	3.15259e-05	66.7182	1.2796	4.73495e-13	63.2241	0.664184	0.000883085	71.6685	0.932517	Multiple epidermal growth factor-like domains 10	0.718		unknown
CGI_10021181	1.05492	9.95169e-09	49.0469	0.898405	3.9623e-07	53.2176	0.837893	4.7695e-06	52.879	0.930407	multiple epidermal growth factor-like domains 10	0.7775		GO:0016020
CGI_10016061	1.09835	2.79717e-06	35.7436	1.15592	1.84072e-05	36.6424	0.516153	0.0177293	42.7143	0.923476	hypothetical protein CGI_10016061	1		unknown
CGI_10005909	0.950581	3.05039e-18	710.047	0.974809	3.27891e-18	734.876	0.829647	1.70632e-13	746.545	0.918346	hypothetical protein CGI_10005909	0.862		unknown
CGI_10027154	1.21794	6.73548e-24	1058.94	0.430954	0.000958475	1345.61	1.08853	8.43593e-13	1108.9	0.912475	hypothetical protein CGI_10027154	0.5873		GO:0016021
CGI_10023240	0.362856	0.000148471	213.168	1.37649	9.37609e-42	172.414	0.946513	1.18819e-19	185.438	0.895286	CARD-caspase [Hydra vulgaris]	0.637		GO:0006508;GO:0004197
CGI_10023317	1.07347	0.00032883	15.9752	0.847635	0.00888913	17.6358	0.758607	0.0049663	17.8839	0.893238	multiple epidermal growth factor-like domains 10	0.669		unknown
CGI_10007871	0.979671	2.70561e-09	79.8674	0.759954	2.13769e-06	87.9625	0.933982	8.59517e-08	82.5346	0.891202	PIH1 domain-containing 2-like	0.5775		unknown
CGI_10012427	1.14742	2.52254e-10	80.6534	0.90303	7.88938e-09	89.1326	0.611422	7.81565e-06	94.5654	0.887292	mitochondrial inner membrane protease subunit 1-like	0.99		GO:0006627;GO:0005739;GO:0016021;GO:0008236
CGI_10021630	0.920231	1.21494e-09	222.948	0.964943	2.83546e-20	230.396	0.776613	7.025e-11	236.661	0.887262	PREDICTED: uncharacterized protein LOC105326539 [Crassostrea gigas]	0.9522		unknown
CGI_10023894	0.414235	0.00740933	964.121	1.24433	4.31139e-18	812.897	1	3.08083e-12	841.337	0.886189	neurogenic locus Notch -like	0.6075		GO:0005509
CGI_10006776	1.12634	2.4883e-06	21.7758	0.70725	0.0088784	25.0159	0.82145	0.000367564	23.9621	0.885013	uncharacterized transmembrane DDB_G0289901-like	1		unknown
CGI_10015631	0.798925	6.91269e-18	220.773	0.930631	2.13277e-25	222.466	0.917787	3.60289e-24	218.639	0.882448	acyl-coenzyme A amino acid N-acyltransferase 2-like	0.6925		GO:0004930;GO:0016746;GO:0007186;GO:0008152;GO:0016021
CGI_10001795	0.90471	1.19679e-06	180.756	0.746835	7.22278e-09	196.662	0.991816	7.02183e-13	181.407	0.88112	Nacrein P2	0.685		GO:0008270;GO:0004089;GO:0006730
CGI_10015989	0.9951	0.000846303	13.1325	0.996164	0.00108677	13.6967	0.636955	0.0395351	14.7812	0.876073	hypothetical protein CGI_10015989	0.78		unknown
CGI_10015546	0.776452	0.000127941	512.189	0.918817	3.0786e-07	515.534	0.932318	1.86051e-07	503.861	0.875862	transmembrane 2-like	0.5875		GO:0005634;GO:0003700;GO:0016021;GO:0006355;GO:0043565
CGI_10016379	0.696344	8.99619e-05	85.6526	0.481258	0.00221845	94.9986	1.44767	4.86663e-16	73.6978	0.875092	hypothetical protein CGI_10016379	1		unknown
CGI_10009880	0.53275	0.000356021	219.601	0.763372	1.73287e-09	214.773	1.30822	9.83228e-34	185.934	0.868113	cytochrome P450 4B1-like	0.5845		GO:0005506;GO:0016705;GO:0016021;GO:0055114;GO:0020037
CGI_10016225	0.507748	0.00421682	1027.74	0.908843	3.13411e-08	961.031	1.18694	8.99651e-14	884.251	0.867842	Fas ligand	0.7413		GO:0006955;GO:0016020;GO:0005164;GO:0043065;GO:0042981
CGI_10010963	0.572	0.000888587	1158.13	1.28261	1.38166e-18	1015.16	0.748497	7.34418e-06	1125.93	0.867701	cell wall DAN4-like isoform X1	0.746		unknown
CGI_10010551	0.973644	3.35884e-15	873.336	0.781373	1.1538e-09	952.902	0.847371	8.20139e-09	918.206	0.867463	methionine synthase isoform X1	0.8495		GO:0009086;GO:0042558;GO:0008705;GO:0008270;GO:0031419;GO:0016021;GO:0005829;GO:0008898;GO:0032259
CGI_10019948	0.513904	0.015658	210.967	1.10695	2.17768e-10	188.832	0.972544	1.48214e-07	190.952	0.864467	GTPase IMAP family member 7	0.625		GO:0005811;GO:0005525;GO:0042803;GO:0003924
CGI_10015361	0.736202	0.00414607	28.2982	0.574695	0.0360961	30.8619	1.27378	1.17123e-06	25.2897	0.86156	Endothelial cells scavenger receptor	0.6345		unknown
CGI_10003880	0.716821	0.000486919	526.795	0.820566	1.77391e-28	538.405	1.04667	3.46562e-36	499.687	0.861352	Autophagy-related 9A	0.7405		GO:0006914;GO:0016021;GO:0010506
CGI_10005272	1.16959	1.91981e-10	85.1605	0.542179	0.0412654	103.468	0.871478	5.91724e-08	93.5144	0.861083	PREDICTED: uncharacterized protein LOC105322628	0.7305		GO:0005509;GO:0006629
CGI_10027821	0.79862	5.14696e-06	384.747	0.963775	1.6996e-08	384.438	0.806797	4.35723e-06	392.06	0.856397	selenocysteine lyase isoform X1	0.754		GO:0008152;GO:0016021;GO:0016829
CGI_10002319	0.678179	7.84676e-07	202.901	0.611575	2.83359e-10	215.504	1.26453	3.55432e-19	180.145	0.851429	hypothetical protein CGI_10002319	0.6545		GO:0097159;GO:1901363;GO:0016021
CGI_10012793	0.416065	0.0126811	154.514	0.972529	1.17169e-11	138.349	1.16281	1.39085e-16	130.044	0.850469	nucleoside diphosphate kinase 6	0.7925		GO:0005524;GO:0006228;GO:0006241;GO:0006183;GO:0005739;GO:0016021;GO:0006165;GO:0004550
CGI_10006994	0.838334	2.5534e-09	69.0601	0.586072	0.000416162	76.8745	1.12633	5.20619e-13	65.9525	0.850244	multiple epidermal growth factor-like domains 10	0.6544		unknown
CGI_10003624	0.829177	7.36e-10	91.4476	1.03001	1.88309e-10	90.639	0.68758	7.98817e-07	96.8263	0.848921	YD repeat	0.7033		GO:0016021
CGI_10023856	0.98537	2.59851e-09	324.146	0.728047	3.9445e-05	360.02	0.804214	1.0393e-05	345.887	0.83921	non-canonical poly(A) RNA polymerase PAPD5-like	0.753		GO:0016779;GO:0008152
CGI_10002316	0.857041	1.69313e-08	108.831	0.569882	7.44113e-07	122.563	1.08866	1.11492e-20	105.311	0.838529	integumentary mucin -like	0.97		unknown
CGI_10026192	0.492	0.00424036	256.596	0.852915	5.7537e-08	242.272	1.16522	1.27891e-13	220.769	0.83671	transcriptional regulator SKO1-like [Crassostrea gigas]	1		GO:0003700;GO:0006355;GO:0043565
CGI_10019916	0.423967	0.000664711	112.281	1.10529	6.17907e-18	97.7658	0.966432	7.52017e-16	99.0935	0.831896	tRNA methyltransferase 10 homolog A	0.731		GO:0008168;GO:0032259
CGI_10007988	0.632573	0.000569443	61.6713	1.29035	3.50062e-12	54.661	0.560789	0.00171412	64.2639	0.827905	Membrane metallo-endopeptidase-like 1	0.6135		unknown
CGI_10026635	0.84491	1.09313e-05	58.9422	0.588331	0.000210646	65.9726	1.0485	9.38086e-10	57.5519	0.827248	caspase-8-like [Biomphalaria glabrata]	0.5885		GO:0005515;GO:0050794;GO:0006508;GO:0006915;GO:0004197;GO:0044424;GO:0050896;GO:0043065;GO:0042981
CGI_10001191	0.600443	0.00173074	34.5918	0.429358	0.0246498	37.9994	1.42679	3.76622e-11	29.0807	0.818863	prostaglandin E2 receptor EP4 subtype-like [Crassostrea gigas]	0.618		GO:0004930;GO:0007186;GO:0016021
CGI_10020259	0.734473	0.000164672	285.632	0.572288	0.000167702	311.927	1.14821	3.12492e-13	264.44	0.818324	NEDD8-conjugating enzyme UBC12-like	0.566		GO:0044260;GO:0005488;GO:0044238
CGI_10016570	0.651124	4.72543e-08	435.021	1.00746	8.54579e-17	413.769	0.796101	1.19316e-10	427.103	0.818228	---NA---	0		unknown
CGI_10018894	0.609754	0.000444079	99.2354	1.26799	4.07817e-14	88.1303	0.575751	0.000555406	102.401	0.817832	retinol dehydrogenase 12-like	0.6445		GO:0016491;GO:0055114
CGI_10015626	0.285327	0.00254199	1972.1	1.00038	7.29969e-23	1687.26	1.16122	4.51202e-68	1598.59	0.815643	receptor-type tyrosine- phosphatase T-like	0.619		GO:0004725;GO:0035335
CGI_10009987	1.12643	9.97394e-16	1874.46	0.555353	0.00457673	2248.19	0.757735	1.45111e-07	2090.88	0.813173	solute carrier organic anion transporter family member 5A1-like [Crassostrea gigas]	0.742		GO:0000166;GO:0006811;GO:0016849;GO:0016021;GO:0004672;GO:0006468;GO:0005886;GO:0005215;GO:0009190
CGI_10024805	1.06487	7.45804e-21	120.91	0.881302	5.06744e-15	131.39	0.485024	5.44056e-05	143.209	0.810399	transmembrane 196-like	0.7125		GO:0016021
CGI_10022750	0.885757	1.42938e-09	173.188	0.689889	4.44305e-06	189.657	0.847709	2.19104e-06	178.095	0.807785	sulfate transporter-like [Lingula anatina]	0.6295		GO:0008271;GO:0016021;GO:1902358
CGI_10021875	0.829966	0.000856099	32.387	0.983195	0.000207116	32.3809	0.604467	0.00781042	35.3722	0.805876	tctex1 domain-containing 4	0.6475		unknown
CGI_10001108	0.759503	3.78357e-08	87.5991	1.1164	1.06492e-10	83.1426	0.527906	0.000644423	95.0901	0.801269	multiple epidermal growth factor-like domains 10	0.633		unknown
CGI_10022698	0.757882	7.34257e-11	136.734	0.70485	2.57477e-08	144.22	0.937644	3.7549e-13	133.645	0.800125	AAEL010828- partial [Aedes aegypti]	0.697		GO:0003824;GO:0008152
CGI_10002191	0.345205	0.0152396	1583.86	1.13221	3.91463e-22	1340.41	0.918995	2.26295e-12	1379.81	0.798804	sacsin-like [Acropora digitifera]	0.513		unknown
CGI_10027286	0.670012	1.08794e-07	371.902	0.444994	0.00612285	412.254	1.27746	2.08488e-34	328.932	0.797488	hypothetical protein CGI_10027286	0.7064		unknown
CGI_10026657	1.07202	3.17523e-09	47.8905	0.510244	0.00654988	57.6935	0.802257	8.4444e-07	52.2439	0.794841	hypothetical protein CGI_10026657	0.632		unknown
CGI_10005683	0.844588	1.41578e-10	187.296	0.87262	3.89764e-14	193.723	0.659053	8.92382e-10	201.153	0.792087	---NA---	0		unknown
CGI_10006308	0.359626	0.0274155	212.499	0.693506	7.11522e-05	200.552	1.32178	1.31746e-13	169.502	0.791636	neutral and basic amino acid transport rBAT-like	0.9156		GO:0005975;GO:0003824;GO:0016021;GO:0043169
CGI_10008703	0.877194	1.93585e-19	11055.1	0.84574	2.57786e-16	11592.8	0.645579	4.1214e-12	11982	0.789504	Protocadherin Fat 4	0.48		GO:0005509;GO:0016021;GO:0007156;GO:0005886
CGI_10018181	1.31469	1.20422e-60	446.214	0.260703	0.000682082	608.658	0.789126	4.74183e-10	511.864	0.788174	transforming growth factor-beta-induced ig-h3-like	0.631		GO:0044421
CGI_10000964	0.641862	0.0051447	52.9823	0.693219	0.000726947	54.501	1.02199	3.95792e-06	49.1437	0.785689	hypothetical protein CGI_10000964	1		unknown
CGI_10016876	0.746061	4.11093e-05	56.1145	0.752502	1.55036e-06	58.5277	0.85693	1.0725e-06	55.7664	0.785164	probable secreted beta-glucosidase adg3	0.5928		GO:0016021
CGI_10024485	0.836409	0.00118251	34.4275	0.722009	0.000991328	37.1657	0.791697	0.00120871	35.7434	0.783372	Limulus clotting factor C	0.4905		GO:0016021
CGI_10009965	0.413884	0.00357369	116.716	1.22649	4.90024e-17	98.6631	0.709231	2.24935e-05	109.546	0.783202	spire homolog 1-like	0.6945		GO:0016192;GO:0003779;GO:0045010
CGI_10026675	1.10781	3.44532e-10	60.254	0.585597	0.000467317	71.7233	0.640205	0.00101832	69.0814	0.777872	canopy homolog 2	0.629		unknown
CGI_10020073	0.735541	9.49216e-16	267.788	0.794012	1.19075e-15	274.352	0.796628	2.02628e-22	269.024	0.775394	zinc finger CCHC-type and RNA-binding motif-containing 1	0.7735		GO:0000166;GO:0005689;GO:0008270;GO:0003723;GO:0000398
CGI_10001977	0.910883	4.22509e-08	49.899	0.967084	8.02523e-08	51.3197	0.424904	0.011617	58.2556	0.767624	hypothetical protein CGI_10001977	1		GO:0016021
CGI_10024417	0.871169	2.38502e-07	458.157	1.03833	6.77007e-11	458.566	0.388491	0.0026694	536.24	0.765997	hypothetical protein CGI_10024417	1		unknown
CGI_10000646	0.626747	0.00135693	56.5563	1.19487	4.81077e-13	51.3404	0.464714	0.00336437	60.798	0.76211	Cytochrome b5	0.795		GO:0043231;GO:0009055;GO:0016020;GO:0005488
CGI_10015832	0.574694	0.00164832	57.6428	1.17917	4.46257e-11	51.5962	0.519963	0.0123928	59.8194	0.757943	hypothetical protein CGI_10015832	0.6767		unknown
CGI_10016490	0.680252	2.71479e-12	186.8	0.638535	6.07695e-10	196.646	0.953215	1.15633e-24	177.994	0.757334	SAC3 domain-containing 1-like	0.5995		GO:0016021
CGI_10019430	0.833164	9.93646e-13	234.753	0.801039	6.13027e-12	246.402	0.63487	5.27086e-08	252.533	0.756358	ninein-like isoform X1 [Crassostrea gigas]	0.718		GO:0001733;GO:0005509;GO:0016021;GO:0009247;GO:0005794
CGI_10015567	1.10433	3.3834e-09	220.832	0.46066	0.0262392	272.357	0.700566	5.2266e-05	249.62	0.755186	Kunitz-type ase inhibitor 5 II	0.7215		GO:0004867;GO:0010951;GO:0005576
CGI_10007706	0.814394	5.3079e-18	686.719	0.880715	3.86881e-25	702.963	0.554485	1.66979e-12	751.336	0.749864	nuclear receptor ROR-beta-like [Crassostrea gigas]	0.679		GO:0005634;GO:0003700;GO:0008270;GO:0006351;GO:0003707;GO:0006355;GO:0043565;GO:0043401
CGI_10025728	0.352481	0.0138401	274.946	1.02161	3.70223e-20	239.131	0.873837	2.2735e-17	243.068	0.749309	hypothetical protein CGI_10025728	0.6485		GO:0016020
CGI_10003260	1.00008	6.07053e-05	19.351	0.633215	0.0080814	22.2466	0.609392	0.0266003	21.935	0.747561	hypothetical protein CGI_10003260	0.925		GO:0016021
CGI_10011594	0.695818	0.00490715	35.0481	0.558105	0.00539199	38.0965	0.986657	6.47667e-07	33.3136	0.74686	Scavenger receptor class F member 2	0.781		unknown
CGI_10019781	0.679166	0.000251678	164.3	1.1529	1.99775e-06	151.029	0.405147	0.0355923	181.662	0.745737	low-density lipo receptor-related 4-like	0.828		GO:0016021
CGI_10008646	0.676013	0.0330477	16.7486	0.944048	0.00288115	16.2202	0.616388	0.0288744	17.5202	0.745483	MAM and LDL-receptor class A domain-containing 1-like	0.57		GO:0016020;GO:0016787
CGI_10010282	0.541622	0.0262252	217.014	0.882519	0.00318064	203.711	0.811302	8.58718e-05	205.906	0.745148	blastula protease 10-like	0.716		GO:0008270;GO:0005509;GO:0006508;GO:0016021;GO:0004222
CGI_10025033	0.843473	2.96346e-05	1523.79	0.451916	0.0119169	1772.63	0.930462	6.37781e-06	1520.6	0.741951	beta-1,3-galactosyl-O-glycosyl-glyco beta-1,6-N-acetylglucosaminyltransferase 3-like [Lingula anatina]	0.7625		GO:0008375;GO:0016020;GO:0008152
CGI_10020817	0.610699	1.19973e-05	120.215	0.85292	5.14062e-08	117.118	0.761615	1.3313e-07	117.599	0.741745	histone-lysine N-methyltransferase 2E-like	0.6563		GO:0016021
CGI_10027978	0.333795	0.0341481	379.288	0.898313	1.33594e-17	338.204	0.992882	6.82202e-09	322.668	0.741663	major facilitator superfamily domain-containing 1-like	0.6695		GO:0055085;GO:0016021
CGI_10015602	0.815636	6.40494e-09	285.649	1.03751	6.85745e-07	280.01	0.366897	2.78389e-05	331.496	0.740014	short-chain collagen C4-like	0.6845		GO:0006508;GO:0004222
CGI_10001396	0.569134	0.0054823	52.138	0.819339	1.95144e-06	50.8233	0.82556	1.60635e-06	49.8799	0.738011	B-cell receptor CD22-like	0.8385		GO:0003677;GO:0090305;GO:0008270;GO:0016020;GO:0004518
CGI_10021249	0.453594	0.00821644	323.119	0.950111	1.58495e-07	293.414	0.796155	2.84027e-06	299.326	0.733287	S-methyl-5-thioribose kinase [Bacillus methanolicus]	0.5955		GO:0016310;GO:0016301
CGI_10010321	0.723174	7.21414e-12	500.05	0.877446	1.07158e-15	500.217	0.589589	1.80577e-06	528.851	0.730069	multiple epidermal growth factor-like domains 11 [Crassostrea gigas]	0.95		GO:0008270;GO:0005622
CGI_10009199	0.459783	0.000187719	225.839	0.885962	5.81425e-14	209.414	0.835092	1.55808e-05	207.098	0.726946	[Monosiga brevicollis MX1]	0.6321		unknown
CGI_10015390	0.679405	0.000142437	50.6801	0.660456	2.23542e-05	53.1042	0.828164	3.34174e-07	49.669	0.722675	hypothetical protein CGI_10015390	0.7425		unknown
CGI_10004647	0.544321	1.73635e-07	275.415	1.11681	2.368e-41	248.549	0.505394	2.07483e-08	284.329	0.722176	Protection of telomeres 1	0.6375		GO:0000723;GO:0043047;GO:0000784
CGI_10016717	1.00647	0.00437131	29.5046	0.535085	0.0249201	35.7591	0.622044	0.00638852	34.1674	0.721201	serine--tRNA cytoplasmic-like	0.8575		GO:0005524;GO:0005737;GO:0001569;GO:0004828;GO:0006434
CGI_10021025	0.813065	8.39208e-22	285.809	0.826622	3.42675e-15	296.38	0.518697	1.28822e-08	316.093	0.719461	hypothetical protein CGI_10021025	1		unknown
CGI_10018307	0.717937	1.03722e-09	109.743	1.17489	7.36888e-11	101.595	0.263723	0.0320904	127.786	0.71885	arrestin domain-containing 2 isoform X1	0.574		unknown
CGI_10002995	0.812085	4.79454e-05	96.4362	0.359955	0.0249953	114.608	0.983323	7.3857e-09	94.6153	0.718454	hypothetical protein CGI_10002995	0.83		unknown
CGI_10020275	0.583517	7.23715e-07	114.624	0.926105	1.77416e-14	109.023	0.643532	2.45606e-08	115.097	0.717718	NACHT and WD repeat domain-containing 1	0.6		unknown
CGI_10023293	0.698598	0.000289047	33.6869	0.957328	6.74367e-06	32.7398	0.492809	0.0122167	36.474	0.716245	thyrotropin-releasing hormone receptor-like	0.772		GO:0004997;GO:0007186;GO:0016021
CGI_10013104	0.352086	0.00804006	143.286	0.543463	0.000491635	140.601	1.2396	1.13685e-19	116.178	0.711717	N-acetylneuraminate lyase [Bacteroides fragilis]	0.6725		GO:0008152;GO:0016829
CGI_10019441	0.798986	0.000205908	70.7241	0.845386	8.45695e-05	72.637	0.484614	0.0452131	78.8251	0.709662	sodium-dependent phosphate transport 2A	0.7985		GO:0015321;GO:0005315;GO:0005436;GO:0005903;GO:0005737;GO:0044341;GO:0016021;GO:0031982;GO:0010038;GO:0035725;GO:0016324;GO:0035435;GO:0030643
CGI_10001788	0.708551	0.0002972	38.3257	0.913575	4.12113e-05	37.7339	0.503689	0.00956502	41.5429	0.708605	ceramide kinase-like	0.5255		GO:0016310;GO:0016301
CGI_10016970	0.989376	4.95452e-10	90.533	0.682658	9.49658e-06	102.066	0.416278	0.0177662	107.91	0.696104	hypothetical protein CGI_10016970	1		unknown
CGI_10027293	0.701307	8.60154e-06	169.35	0.641555	0.00037418	178.768	0.742553	4.88016e-06	170.806	0.695138	peroxisome assembly 26-like	0.905		GO:0005779;GO:0045046;GO:0032403
CGI_10005158	0.857805	1.13758e-12	310.983	0.543512	0.000108227	351.885	0.68306	1.52513e-11	332.423	0.694792	hypothetical protein CGI_10005158	0.6855		unknown
CGI_10024761	0.468815	1.20677e-07	1676.03	0.947152	4.83239e-34	1536.66	0.658274	3.35566e-22	1621.98	0.691414	Phosphatidylinositol-binding clathrin assembly	0.814		GO:0048268;GO:0030136;GO:0006897;GO:0005545
CGI_10006698	0.427212	0.00287009	371.412	1.0135	2.61541e-14	330.777	0.632043	2.4484e-06	357.4	0.690917	multiple epidermal growth factor-like domains 10	0.654		GO:0004725;GO:0035335
CGI_10020845	0.343744	0.0100911	195.522	1.17434	2.04405e-24	163.902	0.54586	7.13344e-05	187.812	0.687983	Plasma kallikrein	0.7845		GO:0008233
CGI_10018014	1.02767	1.103e-20	103.386	0.68397	1.22601e-10	117.259	0.351357	0.000882924	126.67	0.687667	AAEL001143-PA [Aedes aegypti]	0.6265		GO:0016021
CGI_10002809	0.793926	1.12179e-17	191.918	1.04711	1.40411e-28	188.084	0.217739	0.048332	231.19	0.686259	transient receptor potential cation channel subfamily M member 2 isoform X1 [Mustela putorius furo]	0.589		GO:0006811;GO:0016021
CGI_10007993	0.583487	5.51618e-05	1846.93	0.376517	0.00937589	2043.31	1.09369	3.98884e-17	1657.45	0.684566	c-binding -like	0.835		GO:0005216;GO:0034220;GO:0016021
CGI_10028902	0.592263	0.00014182	238.603	0.856627	3.3559e-06	230.701	0.602372	1.22323e-05	242.72	0.683754	hypothetical protein CGI_10028902	0.84		unknown
CGI_10006539	0.553687	0.0135251	26.1426	0.818271	0.000188463	25.287	0.6624	0.00264324	25.8502	0.678119	retinol dehydrogenase 13-like	0.844		GO:0016491;GO:0055114
CGI_10011456	0.324694	0.00259199	282.198	1.32749	1.48152e-17	227.092	0.377732	0.00988058	283.055	0.67664	replication A 70 kDa DNA-binding subunit-like [Parasteatoda tepidariorum]	0.6055		GO:0044763;GO:0006259;GO:0006996;GO:0044424;GO:0044710
CGI_10005711	0.79922	0.000194522	34.1626	0.742845	0.000292454	36.1873	0.48135	0.0161369	38.281	0.674472	probable RNA-dependent RNA polymerase 2	1		unknown
CGI_10004593	0.467117	0.00926759	185.364	0.96935	3.31709e-10	168.828	0.586653	0.000318975	182.944	0.674373	Multiple epidermal growth factor-like domains 10	0.653		GO:0016021
CGI_10008057	0.437664	0.00895282	175.128	0.850647	6.06036e-10	162.673	0.733481	1.05995e-08	164.471	0.673931	histone H2B-like [Crassostrea gigas]	0.936		GO:0005811;GO:0003677;GO:0035267;GO:0046982;GO:0000786
CGI_10005685	0.869666	7.98759e-09	280.125	0.62696	1.75779e-06	311.196	0.522457	3.14261e-06	314.69	0.673028	proline-rich transmembrane 1-like	0.6984		GO:0016021
CGI_10025694	0.704405	3.40163e-13	243.954	0.906284	1.47149e-15	240.968	0.406833	1.9021e-05	271.057	0.672508	N-acetylated-alpha-linked acidic dipeptidase 2	0.548		GO:0016021;GO:0005488
CGI_10006039	0.463844	0.00968534	827.514	0.819574	6.21218e-09	781.669	0.733572	5.89005e-11	784.898	0.67233	N-acetylated-alpha-linked acidic dipeptidase	0.697		GO:0016021
CGI_10003163	1.15934	6.07117e-22	440.772	0.271754	0.0448766	581.097	0.583142	2.63193e-07	519.313	0.671411	ATP synthase subunits region ORF 7	0.648		GO:0009260;GO:0007155;GO:0009201;GO:0030246;GO:0042455
CGI_10010789	0.577184	6.80617e-05	99.6912	0.885209	5.15093e-09	95.5568	0.551279	5.81999e-05	102.523	0.671224	hypothetical protein CGI_10010789	0.995		unknown
CGI_10012305	0.395752	0.044678	395.16	0.706186	5.44389e-09	377.457	0.901406	6.84175e-10	351.729	0.667781	PREDICTED: uncharacterized protein LOC105344292 [Crassostrea gigas]	0.7238		GO:0016021
CGI_10019612	0.384727	0.0434867	5299.35	0.920149	2.25273e-07	4755.58	0.683628	0.000388222	4954.77	0.662835	hypothetical protein CGI_10019612	0.5915		unknown
CGI_10022028	0.619212	7.52797e-13	224.77	0.869891	2.08661e-16	218.73	0.476718	7.73481e-07	238.589	0.655273	retinol dehydrogenase 13-like	0.6805		GO:0016491;GO:0055114
CGI_10009641	0.635861	4.8167e-05	1836.85	0.565556	0.00107332	1947.58	0.75097	1.92476e-06	1816.61	0.650796	valine--tRNA ligase-like	0.8265		GO:0004832;GO:0005524;GO:0006438;GO:0006450;GO:0016021;GO:0002161;GO:0005829
CGI_10019436	0.818047	6.39469e-14	121.765	0.665286	1.13762e-06	131.879	0.463806	6.42678e-05	137.115	0.649046	histone H4 transcription factor [Sinocyclocheilus rhinocerous]	0.7155		GO:0005634;GO:0003677;GO:0010629;GO:0046872;GO:0022402;GO:0006355
CGI_10006033	0.714876	2.88388e-24	351.422	0.542141	4.00314e-09	383.066	0.686846	6.33444e-16	360.817	0.647955	peptide-N(4)-(N-acetyl-beta-glucosaminyl)asparagine amidase	0.68		GO:0006516;GO:0005737
CGI_10007796	0.504551	5.88357e-10	1017.74	0.752475	6.25214e-17	989.11	0.681675	3.93571e-10	987.478	0.646234	cytochrome P450 2J6-like	0.6795		GO:0005506;GO:0016705;GO:0016021;GO:0055114;GO:0004497;GO:0020037
CGI_10000509	0.282973	0.0229652	1760.36	0.768	1.47286e-12	1594.04	0.881478	3.99731e-13	1517.7	0.64415	Amyloid beta A4 precursor -binding family A member 2	0.81		unknown
CGI_10026191	0.35885	0.0242711	212.394	0.54241	8.23341e-05	209.354	1.0173	1.9703e-11	181.355	0.639521	basic leucine zipper transcriptional factor ATF-like isoform X2 [Crassostrea gigas]	0.7575		GO:0003700;GO:0006355;GO:0043565
CGI_10021881	0.775736	5.48152e-05	38.5119	0.609031	0.00082738	42.0931	0.506616	0.00598763	42.4672	0.630461	probable G- coupled receptor	0.545		GO:0004930;GO:0007186;GO:0016021
CGI_10005712	0.827444	2.69268e-05	88.4176	0.6814	0.000346256	95.8557	0.377419	0.0415599	102.724	0.628754	RNA-dependent RNA polymerase 1-like	0.7505		GO:0097159;GO:1901363;GO:0003968;GO:0001172
CGI_10008207	0.270533	0.0273239	376.92	0.871252	1.02286e-19	331.286	0.735285	5.89837e-07	335.573	0.62569	Nucleolar pre-ribosomal-associated 1	0.617		unknown
CGI_10009314	0.479874	0.00106019	253.137	0.486942	1.37693e-07	263.607	0.907807	4.88016e-18	231.005	0.624874	tyrosyl-DNA phosphodiesterase 2-like	0.637		unknown
CGI_10005450	0.467181	0.00608658	194.425	0.755923	6.66937e-06	186.503	0.651194	0.000149349	188.044	0.624766	leucine-rich repeat-containing 32	0.566		GO:0016021
CGI_10003529	0.467184	0.0147173	197.709	0.984613	2.27669e-17	180.104	0.416123	0.03903	204.833	0.62264	GPI-anchored isoform X2	0.7407		GO:0016021
CGI_10014853	0.781496	1.01094e-06	57.9342	0.349145	0.0346979	68.1749	0.736427	8.35009e-07	59.8036	0.622356	peptidyl-prolyl cis-trans isomerase FKBP8-like	1		GO:0016021;GO:0006457
CGI_10004429	0.771503	7.6264e-18	530.156	0.39528	0.0274412	611.298	0.692108	1.09995e-13	552.123	0.61963	Crt-like 1	0.5615		GO:0016021
CGI_10023341	0.369408	0.00919796	113.893	0.883325	5.52966e-10	102.712	0.603527	3.5504e-05	108.508	0.618753	alpha-L-fucosidase-like [Crassostrea gigas]	0.823		GO:0004560;GO:0006004
CGI_10021725	0.763973	1.64908e-07	89.4687	0.465931	0.00192604	101.198	0.625845	3.66054e-05	94.7919	0.618583	yrdC domain-containing mitochondrial-like	0.8085		GO:0016779;GO:0005737;GO:0003725;GO:0006450;GO:0002949;GO:0000049
CGI_10018125	0.769178	2.10375e-21	291.808	0.287109	0.000366999	348.709	0.799303	1.62326e-19	295.366	0.61853	hypothetical protein CGI_10018125	1		unknown
CGI_10020546	0.684947	0.000762872	31.5614	0.703423	0.000461676	32.7122	0.466394	0.020643	34.3287	0.618255	ankyrin repeat and MYND domain-containing 2	0.778		GO:0046872;GO:0042995
CGI_10019688	0.975022	1.20082e-16	122.103	0.468629	2.47116e-05	145.337	0.408632	0.0004223	145.065	0.617428	FGFR1 oncogene partner 2	0.8005		unknown
CGI_10011784	0.559512	1.88147e-05	293.777	0.777216	9.79345e-09	288.146	0.514211	8.35383e-05	303.976	0.61698	FMRFamide receptor-like [Crassostrea gigas]	0.5485		GO:0004930;GO:0007186;GO:0016021
CGI_10004713	0.571203	1.17445e-07	165.877	0.658002	3.71628e-12	168.545	0.621029	6.27391e-09	166.818	0.616745	coiled-coil domain-containing KIAA1407 homolog	0.557		unknown
CGI_10020178	0.598336	1.76795e-05	373.273	0.495922	5.91696e-05	400.192	0.752071	7.1578e-09	365.336	0.615443	GRIP1-associated protein 1	0		unknown
CGI_10000577	0.675484	2.35552e-08	156.044	0.402362	0.00155363	175.642	0.744677	3.03521e-10	156.274	0.607508	PRDM9 zinc finger domain partial	0.612		GO:0003676;GO:0046872;GO:0008168;GO:0032259
CGI_10016571	0.40542	1.08415e-07	1220.53	0.636578	1.49603e-15	1188.77	0.777251	3.87268e-11	1121.19	0.606416	von Willebrand factor A domain-containing 7-like	0.51		GO:0016021
CGI_10002791	0.573715	3.42878e-06	158.51	0.651046	6.42112e-06	161.537	0.588737	0.00010221	161.112	0.604499	hypothetical protein CGI_10002791	0.9225		GO:0005525;GO:0016020
CGI_10008853	0.713574	1.04373e-08	150.439	0.378599	0.00163397	172.371	0.71862	2.59778e-10	153.342	0.603598	tRNA (guanine(10)-N2)-methyltransferase homolog	0.6345		GO:0003676;GO:0008168;GO:0032259
CGI_10000676	0.482288	0.0055367	57.6817	0.713677	0.000179454	56.0701	0.61403	0.000132759	56.7015	0.603332	transcription initiation factor TFIID subunit 3-like	0.6905		GO:0003677;GO:0003743;GO:0005524;GO:0008270;GO:0046982;GO:0004672;GO:0006413;GO:0006468
CGI_10021957	0.647439	2.44812e-06	511.082	0.390196	0.00575882	572.911	0.768719	1.05278e-09	505.199	0.602118	aspartate--tRNA cytoplasmic-like	0.875		GO:0005524;GO:0070062;GO:0005737;GO:0016020;GO:0004815;GO:0006422;GO:0044822
CGI_10001524	0.504633	0.00662985	46.6812	0.656049	0.000472787	46.5702	0.644836	0.000519323	45.8037	0.601839	[Nematostella vectensis]	0.607		unknown
CGI_10012553	0.470186	5.11598e-10	413.023	0.806026	1.07773e-23	392.141	0.527016	3.78277e-13	414.77	0.601076	partial [Nematostella vectensis]	0.5885		GO:0006508;GO:0006915;GO:0004197;GO:0042981
CGI_10018187	0.800539	1.0642e-15	550.664	0.637894	7.15311e-09	597.928	0.36376	0.000215744	634.951	0.600731	short-chain collagen C4-like	0.8195		GO:0046872;GO:0005581
CGI_10003796	0.475663	0.000463885	494.067	0.911668	2.70406e-09	456.589	0.411653	2.55797e-06	514.379	0.599662	stanniocalcin [Haliotis diversicolor supertexta]	0.6767		GO:0005576;GO:0005179
CGI_10027882	0.690619	1.22963e-28	714.252	0.413339	9.09308e-11	803.593	0.694906	2.04558e-21	728.016	0.599621	Zinc transporter 5	0.7545		GO:0005634;GO:0010043;GO:0006829;GO:0061088;GO:0098655;GO:0016021;GO:0005385;GO:0005794
CGI_10022809	0.863432	0.000130069	34.3627	0.412312	0.0365704	40.6419	0.520403	0.0162367	38.5507	0.598716	SET domain-containing partial	0.752		unknown
CGI_10016879	0.67392	3.63522e-06	4290.23	0.462349	0.00601354	4738.61	0.649384	2.14667e-05	4405.76	0.595218	serine protease inhibitor Cvsi-2-like	0.605		GO:0016021
CGI_10012989	0.50718	0.000332312	176.375	0.980822	9.67839e-15	162.256	0.290973	0.0284375	192.522	0.592992	Werner syndrome ATP-dependent helicase-like	0.737		GO:0003676;GO:0005524;GO:0008152;GO:0004386
CGI_10021597	0.820925	9.77363e-06	47.2094	0.566378	0.00563305	52.8011	0.368421	0.031156	54.9356	0.585242	cystinosin-like isoform X2	0.7875		GO:0016021;GO:0015184;GO:0015811;GO:0005765
CGI_10023698	0.433072	0.00686519	82.471	0.76582	0.00013906	77.7733	0.553474	0.000464173	81.2385	0.584122	espin-like isoform X2	0.704		unknown
CGI_10014114	0.455117	0.00054103	155.75	0.5534	9.79892e-07	157.553	0.74347	1.04061e-10	146.745	0.583996	alpha-(1,3)-fucosyltransferase C-like	0.6345		GO:0008417;GO:0032580;GO:0036065;GO:0016021;GO:0006486
CGI_10003851	0.49573	0.004535	51.4465	0.709126	9.61784e-06	50.4956	0.537211	0.00217909	51.9608	0.580689	Tyramine octopamine receptor [Crassostrea gigas]	0.594		GO:0004930;GO:0007186;GO:0016021
CGI_10022775	0.376846	0.0106863	1013.92	0.697051	1.66627e-06	962.182	0.663063	7.96873e-07	952.865	0.578987	coadhesin- partial	0.706		GO:0016021
CGI_10022434	0.480553	0.00189496	135.301	0.66762	3.43533e-10	133.631	0.583622	0.000293469	133.988	0.577265	ribosomal L1 domain-containing 1-like [Aplysia californica]	0.6925		GO:0003723
CGI_10026867	0.627022	9.56449e-06	566.133	0.201183	0.00284427	671.475	0.886466	2.94489e-36	541.988	0.571557	retinal dehydrogenase 1-like	0.8415		GO:0005737;GO:0001758;GO:0042572;GO:0055114
CGI_10020221	0.721774	6.25868e-07	147.435	0.465412	0.00138436	165.196	0.522834	0.000197853	159.211	0.570007	XK-related 6-like	0.72		GO:0016021
CGI_10026802	0.658475	9.94856e-07	143.087	0.423274	0.00180052	159.437	0.617956	7.79413e-06	147.571	0.566568	multiple epidermal growth factor-like domains 8	0.5905		unknown
CGI_10005984	0.704494	4.47612e-16	303.741	0.445117	3.05205e-06	339.573	0.549517	6.82232e-10	323.091	0.566376	sodium channel and clathrin linker 1-like	0.6835		GO:0005813;GO:0051297
CGI_10012800	0.550366	2.02868e-08	270.272	0.519251	0.00144617	283.124	0.629399	5.56495e-09	269.723	0.566339	serine threonine- kinase BUR1-like	0.91		GO:0005509;GO:0016021;GO:0007156
CGI_10018675	0.917683	4.45528e-33	1056.79	0.227167	0.0189748	1334.93	0.553101	1.54598e-06	1185.02	0.565984	mucin-4-like isoform X2	0.6255		GO:0007160;GO:0005509;GO:0016021;GO:0005201;GO:0005578
CGI_10011054	0.502754	0.0011495	561.153	0.511201	3.78832e-06	583.599	0.678327	4.16871e-12	546.413	0.564094	hypothetical protein CGI_10011054	0.73		GO:0007165
CGI_10000013	0.518437	0.0003061	150.106	0.330123	0.0153179	165.143	0.839578	1.82485e-10	140.314	0.562713	Elongation factor mitochondrial	0.7545		GO:0005525;GO:0003746;GO:0003924;GO:0005739;GO:0070125
CGI_10018760	0.48674	2.2089e-05	426.75	0.732079	6.16908e-08	414.285	0.465193	0.000275434	437.982	0.561337	acetylcholine receptor subunit alpha-1-B-like isoform X2 [Crassostrea gigas]	0.636		GO:0034220;GO:0016021;GO:0005230
CGI_10021664	0.444701	1.7628e-06	1046.73	0.422333	7.31078e-05	1095.83	0.813605	1.45968e-17	965.199	0.560213	ATP-binding cassette sub-family A member 3	0.663		GO:0016887;GO:0005524;GO:0043231;GO:0008152;GO:0016021;GO:0044763;GO:0044765;GO:0005215
CGI_10012083	0.605997	1.14888e-05	72.3512	0.415513	0.00171357	79.4821	0.641269	5.28868e-06	73.0408	0.554259	zinc finger 451-like [Crassostrea gigas]	0.6635		GO:0046872
CGI_10011203	0.436242	0.0452329	45.6567	0.672499	0.00145993	44.3838	0.542447	0.0241951	45.1547	0.550396	hypothetical protein CGI_10011203	1		unknown
CGI_10004035	0.481629	5.96602e-07	200.773	0.500236	3.98051e-07	207.875	0.663314	2.53023e-07	194.732	0.548393	[Nematostella vectensis]	0.606		unknown
CGI_10011086	0.475523	0.00938301	136.769	0.44203	0.0148318	143.613	0.722032	0.000106332	129.948	0.546528	mitochondrial import inner membrane translocase subunit Tim13-like	0.8405		GO:0046872;GO:0005739;GO:0015031
CGI_10027531	0.745907	4.13982e-14	328.005	0.354871	0.00135846	381.242	0.535006	1.15184e-06	354.575	0.545261	General transcription factor 3C polypeptide 1	0.6015		unknown
CGI_10014917	0.56526	1.19873e-05	192.113	0.479449	1.93274e-06	204.977	0.588169	1.53438e-08	194.893	0.544293	N-terminal EF-hand calcium-binding 1-like	0.661		GO:0005509
CGI_10006854	0.436639	0.00181	329.14	0.482875	1.87717e-05	338.159	0.707079	4.20943e-07	311.221	0.542198	Protoporphyrinogen oxidase	0.5745		GO:0006779;GO:0004729;GO:0055114
CGI_10006123	0.765	3.53076e-06	160.228	0.512516	0.000539925	179.163	0.346913	0.0195536	184.574	0.541476	TATA box-binding -associated factor RNA polymerase I subunit A	0.6115		GO:0043229
CGI_10023816	0.45891	0.0157655	118.28	0.488601	0.00110402	122.169	0.673118	0.000164545	113.55	0.54021	[Nematostella vectensis]	0.7005		GO:0005975;GO:0004563;GO:0030247
CGI_10016736	0.483372	4.65363e-05	416.929	0.478509	4.51743e-05	434.357	0.652441	5.07865e-09	405.715	0.538107	MON2 homolog isoform X2	0.8005		unknown
CGI_10023301	0.644918	1.29055e-06	203.429	0.727441	1.82875e-10	207.384	0.228302	0.0204513	235.216	0.533554	hypothetical protein CGI_10023301	0.688		unknown
CGI_10006846	0.617133	2.42848e-08	127.631	0.549809	2.91457e-06	135.144	0.4292	0.00015143	137.375	0.532048	glutamate receptor kainate 2-like	0.7385		GO:0006811;GO:0016021;GO:0005230;GO:0045202;GO:0044763;GO:0005886
CGI_10006978	0.648032	5.98027e-12	2359.74	0.587945	8.53952e-10	2496.06	0.355784	0.00103857	2619.38	0.530587	cilia- and flagella-associated 47	0.663		unknown
CGI_10012739	0.353066	0.00506406	583.742	0.715922	5.78624e-09	547.325	0.517856	1.25173e-05	567.204	0.528948	G- coupled receptor Mth2	0.5345		GO:0004930;GO:0007186;GO:0016021;GO:0007166
CGI_10003264	0.981185	2.37641e-41	398.582	0.261269	0.00108843	505.462	0.343327	2.31894e-05	483.311	0.528594	ADAM 17-like protease	0.513		GO:0006508;GO:0016021;GO:0004222
CGI_10022508	0.337848	0.0294745	109.309	0.295934	0.039852	115.3	0.941364	1.80664e-10	94.3709	0.525049	testis-expressed sequence 10 isoform X2	0.5545		unknown
CGI_10009951	0.230313	0.0204693	353.015	0.459318	6.25404e-06	342.262	0.880349	7.60108e-12	298.96	0.523327	aminopeptidase	0.845		GO:0005737;GO:0006508;GO:0008235;GO:0004177;GO:0030145
CGI_10028862	0.456242	1.613e-06	424.516	0.770618	8.01848e-12	404.622	0.341197	2.18931e-05	448.841	0.522686	von Willebrand factor D and EGF domain-containing -like	0.4965		unknown
CGI_10020539	0.736152	2.93077e-09	1378.48	0.496831	1.05304e-05	1533.63	0.324773	0.00566522	1583.8	0.519252	Quinone oxidoreductase PIG3	0.767		unknown
CGI_10004077	0.656136	8.60036e-11	247.425	0.579488	8.80641e-10	263.142	0.321194	0.00359874	278.532	0.518939	Sjoegren syndrome nuclear autoantigen 1	0.674		unknown
CGI_10010897	0.271451	0.0437032	1259.4	0.414218	0.0046806	1252.73	0.869528	1.08241e-12	1084.56	0.518399	proline iminopeptidase-like isoform X2 [Crassostrea gigas]	0.731		GO:0006508;GO:0008233
CGI_10003385	0.333518	0.0140221	1075.59	0.756945	8.47159e-10	992.001	0.456939	0.00294808	1056.46	0.5158	Receptor-type tyrosine- phosphatase kappa	0.5485		GO:0004725;GO:0016021;GO:0035335
CGI_10026971	0.432294	0.000221188	147.036	0.504683	0.00036989	149.532	0.605934	1.61708e-06	142.664	0.514304	alanine--tRNA cytoplasmic	0.5935		GO:0003676;GO:0005524;GO:0005737;GO:0004813;GO:0006419
CGI_10009309	0.510791	0.00753918	972.021	0.592104	0.00205026	988.475	0.432047	0.0125951	1016.9	0.511647	short-chain collagen C4-like	0.804		GO:0005581
CGI_10009516	0.346828	0.0152459	166.679	0.540164	3.22602e-06	163.763	0.647493	5.73424e-06	155.858	0.511495	Chitin synthase 3	0.826		GO:0016758;GO:0008152;GO:0016021
CGI_10016234	0.35724	0.00085249	210.54	0.529779	2.16303e-08	208.01	0.641532	1.63623e-09	197.722	0.509517	hypothetical protein CGI_10016234	0.613		GO:0007165
CGI_10019009	0.301625	0.0219185	473.412	0.94349	2.22277e-25	413.189	0.278294	0.0267855	486.956	0.507803	hypothetical protein CGI_10019009	1		unknown
CGI_10009223	0.504631	1.30444e-16	840.46	0.641418	7.936e-25	841.557	0.3708	3.19369e-05	891.576	0.505616	UPF0518 AAEL005291 isoform X1 [Megachile rotundata]	0.681		unknown
CGI_10008992	0.417695	7.11885e-05	1729.85	0.815432	2.58909e-19	1613.19	0.282633	0.00446652	1839.9	0.505254	hypothetical protein CGI_10008992	0.8938		GO:0008061;GO:0006030;GO:0016021;GO:0005576
CGI_10013334	0.353102	1.55995e-05	6012.41	0.734195	5.45027e-34	5618.93	0.423436	1.449e-10	6008.08	0.503577	VWFA and cache domain-containing 1-like	0.6055		GO:0016021
CGI_10014240	0.783183	2.81814e-34	539.196	0.22101	0.00249008	660.021	0.501461	9.35973e-09	593.663	0.501885	dyslexia-associated KIAA0319 isoform X2	0.712		GO:0070062;GO:0005515;GO:0016020;GO:0031410
CGI_10027840	0.496433	0.00189208	1219.33	0.418849	0.00896537	1298.46	0.562806	5.44059e-05	1221.34	0.492696	arylsulfatase B-like	0.733		GO:0008484;GO:0008152
CGI_10006214	0.493929	3.06144e-06	855.236	0.510221	2.77723e-05	885.045	0.469637	5.13689e-05	878.371	0.491262	leucine-rich repeat-containing 48 isoform X1 [Pelodiscus sinensis]	0.7965		GO:0008063
CGI_10000675	0.371554	0.0016453	108.332	0.579709	2.23992e-05	105.88	0.515775	0.00199544	105.698	0.489013	Transcription initiation factor TFIID subunit 3	0.8285		GO:0003677;GO:0003743;GO:0005524;GO:0008270;GO:0046982;GO:0004672;GO:0006413;GO:0006468
CGI_10012635	0.454509	1.8328e-06	241.67	0.424449	0.000412963	253.446	0.587473	4.60657e-09	237.343	0.48881	3-oxoacyl-[acyl-carrier- ] reductase -like	0.8465		GO:0016491;GO:0055114
CGI_10016529	0.647599	0.000418935	52.8513	0.449853	0.00687015	58.286	0.367561	0.0250402	58.5898	0.488338	prolyl-tRNA synthetase associated domain-containing 1-like	0.718		GO:0006450;GO:0002161
CGI_10020329	0.458943	4.89614e-13	577.538	0.330228	1.1183e-07	624.442	0.667385	7.73131e-30	555.889	0.485519	activating signal cointegrator 1 complex subunit 2	0.6105		unknown
CGI_10017987	0.543574	0.000778169	104.556	0.383532	0.0207262	114.111	0.529001	0.00160312	107.157	0.485369	hypothetical protein CGI_10017987	0.9967		unknown
CGI_10005856	0.493653	0.000152127	803.552	0.444761	0.00076939	848.729	0.517526	1.69407e-05	814.958	0.485314	chitin synthase	0.6425		GO:0016758;GO:0008152;GO:0016021
CGI_10005722	0.435239	7.07587e-05	320.268	0.4267	0.000363414	333.748	0.593895	7.30972e-09	311.896	0.485278	Vacuolar sorting-associated 45	0.776		GO:0005515;GO:0006904;GO:0016021;GO:0000139;GO:0010008;GO:0007596;GO:0006886
CGI_10016640	0.790795	4.81169e-10	960.003	0.329094	0.00362625	1139.77	0.335044	0.000632391	1115.87	0.484978	steroid 17-alpha-hydroxylase 17,20 lyase-like	0.7875		GO:0005506;GO:0016705;GO:0055114;GO:0004497;GO:0020037
CGI_10012866	0.620227	2.59245e-13	212.707	0.47315	1.54804e-07	230.625	0.354643	4.48833e-05	234.465	0.482673	MCM10 homolog	0.6055		GO:0005634;GO:0006260;GO:0005488
CGI_10003475	0.53971	3.62007e-06	1352.62	0.345463	0.0043533	1491.08	0.56185	3.93977e-06	1370.86	0.482341	Isocitrate dehydrogenase [NAD] subunit mitochondrial	0.876		GO:0000287;GO:0004449;GO:0051287;GO:0005739;GO:0006099
CGI_10024177	0.511743	0.001397	67.6955	0.587841	0.000243798	68.9251	0.34078	0.0494875	72.8061	0.480121	endoplasmic reticulum membrane-associated RNA degradation -like [Crassostrea gigas]	0.98		unknown
CGI_10002645	0.576452	1.14719e-13	999.517	0.307195	0.00075402	1125.85	0.554659	7.21371e-12	1025.46	0.479435	ralA-binding 1-A-like [Priapulus caudatus]	0.7735		GO:0016020
CGI_10009451	0.402657	0.000502637	254.733	0.411224	0.00122542	264.559	0.624017	1.10462e-08	244.232	0.479299	PREDICTED: uncharacterized protein LOC105319759 isoform X1	0.56		unknown
CGI_10007227	0.411935	0.001464	132.391	0.304498	0.0160312	142.403	0.719918	1.52398e-06	123.766	0.478784	RPA-interacting A-like [Aplysia californica]	0.6445		unknown
CGI_10018571	0.588533	0.000326852	1294.52	0.418972	0.0090758	1416.06	0.418646	0.0146757	1388.08	0.475384	kinesin KIF28P	0.757		GO:0016887;GO:0005524;GO:0003777;GO:0030705;GO:0016020;GO:0008152;GO:0005871;GO:0007018;GO:0005874;GO:0008017
CGI_10004711	0.423938	6.24005e-08	546.549	0.564177	1.81789e-07	545.928	0.43733	9.68137e-06	555.511	0.475148	centrosomal of 85 kDa-like isoform X1 [Crassostrea gigas]	1		unknown
CGI_10018897	0.552936	1.34332e-05	116.206	0.394904	0.000564743	126.911	0.462346	4.94353e-05	121.992	0.470062	EGF domain-specific O-linked N-acetylglucosamine transferase-like [Aplysia californica]	0.797		GO:0005788;GO:0006493;GO:0016262
CGI_10024115	0.422914	0.000503362	114.881	0.679305	1.9043e-08	110.932	0.29932	0.0268021	121.446	0.46718	liprin-alpha-1-like isoform X1	0.635		unknown
CGI_10025920	0.290226	0.01084	1282.32	0.513796	8.17203e-06	1247.17	0.594849	1.23449e-09	1195.54	0.46629	MAM and LDL-receptor class A domain-containing 1-like	0.576		GO:0008270;GO:0006508;GO:0004222
CGI_10011320	0.399234	0.0104881	105.457	0.521904	7.53853e-06	106.06	0.476578	0.000207991	105.413	0.465906	hypothetical protein CGI_10011320	0.8		unknown
CGI_10026588	0.386248	1.32102e-05	426.893	0.709743	1.89557e-17	405.094	0.300893	0.015325	447.091	0.465628	Vitamin K-dependent gamma-carboxylase	0.695		GO:0016021;GO:0017187;GO:0008488
CGI_10026130	0.54795	0.00026255	89.796	0.306428	0.0281469	100.501	0.539723	0.000253548	91.9096	0.4647	glycine receptor subunit alpha-3-like isoform X1 [Lingula anatina]	0.683		GO:0007154;GO:0034220;GO:0016021;GO:0005230;GO:0044700;GO:0006821;GO:0005886;GO:0050896
CGI_10024381	0.330884	0.000359415	749.093	0.824473	1.38313e-17	678.732	0.227092	0.0243834	789.999	0.460816	troponin skeletal muscle-like	0.583		GO:0005509
CGI_10011906	0.453124	0.000646914	552.912	0.413966	0.00504635	581.642	0.513856	6.06782e-05	554.167	0.460315	mitochondrial inner membrane OXA1L	0.571		GO:0016021;GO:0051205
CGI_10007686	0.45336	3.04297e-06	251.598	0.676147	8.43276e-13	245.965	0.25122	0.0118761	273.345	0.460242	F-box WD repeat-containing 5-like	0.7605		GO:0005509;GO:0016021
CGI_10002983	0.486677	0.00169003	110.221	0.460398	0.000363647	115.995	0.425602	0.000560308	114.655	0.457559	Y+L amino acid transporter 2 [Acromyrmex echinatior]	0.64		GO:0016021;GO:0015171;GO:0003333
CGI_10020977	0.523183	0.0052051	200.269	0.4622	0.0134688	212.083	0.386829	0.034195	212.935	0.457404	elongation of very long chain fatty acids 4-like	0.7025		GO:0016021;GO:0016740;GO:0006633
CGI_10027328	0.528055	2.16633e-09	872.548	0.382394	6.17672e-06	947.561	0.456664	2.64755e-10	909.176	0.455704	Polyprenol reductase	0.6655		unknown
CGI_10011092	0.367929	0.00063954	448.913	0.357936	0.00466929	468.156	0.640192	1.18673e-10	423.328	0.455353	pancreatic triacylglycerol lipase-like isoform X1 [Crassostrea gigas]	0.9		GO:0006629;GO:0005576;GO:0052689
CGI_10001650	0.253013	0.042623	141.239	0.746863	9.7359e-09	127.332	0.361289	0.00448288	139.278	0.453722	Constitutive coactivator of PPAR-gamma 1	0.7195		GO:0005634
CGI_10016083	0.367179	0.0116623	79.1232	0.522935	0.000212488	78.5291	0.467574	0.000686523	78.2983	0.452563	NAD-dependent deacetylase sirtuin-4	0.737		GO:0044429;GO:0016811;GO:0006464;GO:0019752;GO:0048523;GO:0016740;GO:0019216;GO:0070403;GO:0010565
CGI_10017719	0.44526	3.03217e-05	340.113	0.523148	2.35615e-07	345.783	0.382992	4.82882e-05	353.817	0.450466	centrosomal of 72 kDa isoform X1	0.59		unknown
CGI_10026120	0.340678	0.00195686	455.913	0.540395	2.43665e-08	447.134	0.462268	2.71366e-08	448.54	0.447781	ER membrane complex subunit 10-like	0.5485		unknown
CGI_10020634	0.401605	4.97255e-05	334.023	0.37724	0.00055232	349.729	0.560461	1.89057e-10	325.389	0.446435	nuclear cap-binding subunit 2 [Microplitis demolitor]	0.883		GO:0000166;GO:0005634;GO:0005846;GO:0045292;GO:0006370;GO:0000339;GO:0031047
CGI_10025706	0.516263	0.00100457	338.132	0.360037	0.0466871	368.504	0.460787	0.0132961	350.44	0.445696	methylenetetrahydrofolate reductase-like isoform X1 [Biomphalaria glabrata]	0.811		GO:0035999;GO:0055114;GO:0004489;GO:0006555
CGI_10017607	0.664751	9.34154e-18	550.979	0.31046	6.93085e-05	635.702	0.355054	1.50786e-05	614.936	0.443422	yellow-like [Harpegnathos saltator]	0.567		unknown
CGI_10002717	0.291614	0.000699929	468.251	0.47714	1.72392e-09	460.722	0.554818	5.50289e-10	441.56	0.44119	Uncharacterized protein C12orf56-like protein	0.75		unknown
CGI_10026119	0.178448	0.0497716	465.616	0.681182	4.64232e-15	417.227	0.456692	5.11599e-08	435.6	0.438774	FMRFamide receptor-like [Lingula anatina]	0.608		GO:0003676;GO:0046872;GO:0016021
CGI_10011636	0.301192	0.0053444	179.43	0.542782	1.1411e-05	173.792	0.4703	0.000108306	174.046	0.438091	dehydrogenase reductase SDR family member 7-like	0.738		GO:0016491;GO:0016020;GO:0055114
CGI_10020496	0.822238	8.37207e-17	311.493	0.19642	0.00612362	388.414	0.292445	2.75778e-05	369.611	0.437034	dynein light chain axonemal	0.9075		GO:0008063
CGI_10021534	0.394446	2.43016e-07	311.369	0.440169	4.4277e-05	319.087	0.471589	7.03278e-07	309.975	0.435401	NF-kappa-B inhibitor 1 isoform X1	0.5405		GO:0008063;GO:0050776
CGI_10003728	0.277601	0.020742	945.578	0.605526	1.25857e-06	892.205	0.422898	0.000179261	922.854	0.435341	Glutamate receptor kainate 2	0.513		GO:0034220;GO:0016021;GO:0035235;GO:0004970;GO:0005234
CGI_10020388	0.540598	9.14682e-12	486.264	0.496748	5.50875e-12	512.722	0.268471	5.15982e-05	538.633	0.435273	unconventional myosin-IXb isoform X2 [Halyomorpha halys]	0.6685		GO:0016459;GO:0005524;GO:0008152;GO:0003774
CGI_10027520	0.528136	4.32828e-07	286.634	0.413314	1.38142e-05	308.407	0.35617	8.61883e-05	307.755	0.43254	probable tubulin polyglutamylase TTLL9	0.833		GO:0006464
CGI_10004909	0.45363	0.00568333	126.065	0.335353	0.018371	136.135	0.504892	0.00225333	126.641	0.431292	PREDICTED: uncharacterized protein LOC105317645 isoform X1 [Crassostrea gigas]	0.72		GO:0016021
CGI_10022885	0.480793	5.91038e-06	158.299	0.518622	9.16725e-07	162.9	0.291914	0.00601172	170.957	0.430443	Leucine-rich repeat-containing 69	0.7875		GO:0008063
CGI_10011093	0.396938	3.11507e-05	1028.61	0.312154	0.0111483	1097.86	0.582208	7.92125e-08	994.015	0.430433	pancreatic triacylglycerol lipase-like isoform X1	0.576		GO:0008152;GO:0005576;GO:0052689
CGI_10020439	0.444112	7.52834e-09	587.412	0.37138	9.61375e-05	624.45	0.475421	2.39234e-09	593.615	0.430304	[Nematostella vectensis]	0.5033		GO:0005158
CGI_10012715	0.455792	0.00377897	132.324	0.381409	0.00217725	140.776	0.441864	0.00769211	135.332	0.426355	probable NADH dehydrogenase [ubiquinone] 1 alpha subcomplex subunit 12	0.7465		GO:0009055;GO:0016020;GO:0008137;GO:0055114
CGI_10024854	0.498088	0.00108403	112.418	0.423051	0.00426408	119.731	0.357335	0.020966	119.665	0.426158	Ig-like and fibronectin type-III domain-containing	0.533		GO:0016021
CGI_10011507	0.200355	0.0184533	903.378	0.609844	8.28541e-15	831.474	0.461046	5.45213e-09	850.569	0.423748	trichohyalin-like isoform X1 [Crassostrea gigas]	0.6127		unknown
CGI_10025169	0.294355	0.00251528	401.753	0.487801	1.07661e-07	394.084	0.487948	7.40907e-06	386.238	0.423368	SWI SNF-related matrix-associated actin-dependent regulator of chromatin subfamily A containing DEAD H box 1 isoform X2	0.772		GO:0005524;GO:0031981;GO:0016575;GO:0044427
CGI_10015861	0.309543	0.0162165	608.025	0.488702	1.73698e-05	599.787	0.466454	4.30801e-05	592.003	0.421566	kyphoscoliosis peptidase-like	0.5225		unknown
CGI_10014201	0.518596	2.80405e-07	1551.77	0.425884	0.000404656	1658.68	0.318724	0.00739214	1681.09	0.421068	carbonic anhydrase-like	0.688		GO:0008270;GO:0016021;GO:0004089;GO:0006730
CGI_10025361	0.226152	0.0460756	486.749	0.602378	1.93461e-10	452.604	0.42625	0.000188967	466.615	0.41826	arrestin domain-containing 3-like	0.719		unknown
CGI_10003841	0.403888	3.1696e-09	381.364	0.310425	0.00121262	408.444	0.539374	7.62881e-13	373.879	0.417895	ribokinase	0.711		GO:0004747;GO:0006014;GO:0046835
CGI_10019949	0.381587	0.00256015	524.459	0.295595	0.0298911	560.156	0.574917	2.50637e-06	505.57	0.417366	Deoxyuridine 5 -triphosphate mitochondrial	0.8545		GO:0000287;GO:0005525;GO:0070062;GO:0004170;GO:0005739;GO:0006226;GO:0005654;GO:0044822;GO:0046081
CGI_10018958	0.527605	3.09858e-08	437.546	0.512611	1.41032e-06	456.967	0.210691	0.0406948	491.815	0.416969	neuropilin and tolloid 1	0.5555		GO:0016021
CGI_10010071	0.315331	0.00125586	456.454	0.469716	2.90972e-06	453.367	0.463429	2.00675e-06	445.581	0.416159	exosome complex component MTR3-like	0.7745		GO:0000177;GO:0000176;GO:0090305;GO:0071051;GO:0034475;GO:0004527;GO:0016075;GO:0016021;GO:0071028;GO:0005730;GO:0034427;GO:0031125
CGI_10015776	0.452047	4.2951e-07	695.398	0.337765	2.27595e-06	749.182	0.457383	9.71854e-11	708.417	0.415732	sodium- and chloride-dependent glycine transporter 1-like	0.742		GO:0006836;GO:0005328;GO:0055085;GO:0016021
CGI_10017351	0.585524	3.52376e-08	304.503	0.250508	0.00727994	350.43	0.408318	3.08097e-05	327.135	0.414783	beta-1,3-galactosyltransferase 1-like	0.6395		GO:0016021;GO:0006486;GO:0008378;GO:0005794
CGI_10027967	0.502185	0.000329863	370.114	0.355186	0.0277015	402.195	0.379367	0.010197	391.736	0.412246	phospholipase A-2-activating	0.7075		unknown
CGI_10009927	0.264292	0.0389063	246.179	0.42562	0.00172672	243.434	0.540343	2.31411e-05	230.85	0.410085	thiosulfate sulfurtransferase-like	0.6315		GO:0008152;GO:0016740
CGI_10017186	0.367681	0.000888426	614.444	0.287245	0.0157276	655.325	0.573962	5.7777e-09	590.338	0.409629	bifunctional glutamate proline--tRNA ligase-like	0.7405		GO:0005524;GO:0005737;GO:0004827;GO:0004818;GO:0006424;GO:0006433
CGI_10010453	0.320966	0.000150859	10456.2	0.538397	5.12208e-14	10201.5	0.35933	5.86861e-05	10541.5	0.406231	chitin synthase	0.7625		GO:0016459;GO:0005524;GO:0016758;GO:0008152;GO:0016021;GO:0003774
CGI_10008541	0.566455	4.7339e-05	467.966	0.289339	0.0164901	529.569	0.360067	0.00174939	508.195	0.405287	ATP-binding cassette sub-family D member 2	0.8395		GO:0005524;GO:0042626;GO:0006635;GO:0005779;GO:1902001;GO:0000038
CGI_10027191	0.326131	0.00261511	166.41	0.291573	0.00270707	175.177	0.595707	1.91104e-08	156.943	0.40447	star [Acyrthosiphon pisum]	0.677		unknown
CGI_10008423	0.298936	0.000580153	315.092	0.408748	1.33418e-06	316.787	0.502035	1.82167e-05	301.875	0.40324	early endosome antigen 1-like	0.566		GO:0046872
CGI_10024178	0.36775	0.0228504	97.9861	0.37279	0.0099233	101.922	0.465508	0.00283215	97.0773	0.402016	endoplasmic reticulum membrane-associated RNA degradation	0.54		GO:0016021
CGI_10011743	0.416061	0.000676834	91.0826	0.278599	0.0377945	98.8991	0.491491	0.000176754	90.9578	0.395384	DNA fragmentation factor subunit beta	0.6565		GO:0005634;GO:0005737;GO:0006309;GO:0016787
CGI_10014406	0.48433	1.20509e-06	288.524	0.403374	3.50722e-06	307.342	0.292957	0.00332191	311.704	0.393554	DNA helicase B	0.6085		GO:0090304;GO:0044260;GO:0008026
CGI_10003419	0.216112	0.00396396	359.425	0.375894	3.0649e-06	355.464	0.583917	4.34304e-15	328.081	0.391974	Glycerophosphodiester phosphodiesterase domain-containing 5	0.6105		GO:0006629;GO:0008889
CGI_10009434	0.296781	0.00496374	303.146	0.219437	0.0467652	323.321	0.654252	1.05245e-09	278.589	0.390157	NADH dehydrogenase [ubiquinone] complex assembly factor 7	0.724		unknown
CGI_10017925	0.393581	0.00124491	270.17	0.340337	0.00323774	285.683	0.430849	0.00031263	272.467	0.388256	small nuclear ribonucleo -associated B -like	0.853		GO:0051170;GO:0005697;GO:0006369;GO:0005654;GO:0005689;GO:0070062;GO:0071013;GO:0034709;GO:0046540;GO:0005829;GO:0098779;GO:0030620;GO:0005682;GO:0008334;GO:0005683;GO:0002230;GO:0005686;GO:0006479;GO:0005685;GO:0098792;GO:0005687;GO:0044822;GO:0000387;GO:0005515;GO:0070034;GO:0034719;GO:0071204;GO:0019013;GO:0071004;GO:0071208
CGI_10017758	0.276678	0.00119067	453.815	0.696501	1.11993e-16	417.802	0.186795	0.0293702	477.07	0.386658	LPS-induced TNF-alpha factor	0.6935		GO:0016021
CGI_10027088	0.421126	0.000240144	189.407	0.413501	1.45227e-05	197.798	0.320617	0.0331943	199.449	0.385081	irregular chiasm C-roughest -like isoform X1	0.5208		unknown
CGI_10009739	0.371281	0.000820616	805.75	0.585493	1.00958e-09	788.051	0.197694	0.0128437	868.626	0.384823	von Willebrand factor C domain-containing 2-like	0.642		unknown
CGI_10005109	0.576134	2.63835e-07	2019.7	0.288343	0.0211476	2290.84	0.287805	0.00637194	2247.14	0.384094	tumor necrosis factor ligand superfamily member 10	0.62		GO:0006955;GO:0016021;GO:0005164;GO:0043065;GO:0042981
CGI_10008709	0.491511	1.87234e-06	369.593	0.375705	0.00188838	397.663	0.280504	0.017039	401.699	0.382574	UPF0562 C7orf55 homolog	0.692		unknown
CGI_10002069	0.393647	0.0052658	759.758	0.283827	0.0287875	818.46	0.466387	0.000104281	758.844	0.381287	von Willebrand factor D and EGF domain-containing -like	0.579		GO:0016021
CGI_10024642	0.455238	4.8521e-08	678.813	0.291875	0.000701476	742.2	0.394961	5.78894e-06	705.201	0.380692	centrosomal of 192 kDa isoform X1	0.5745		unknown
CGI_10007652	0.312677	0.00645966	2134.05	0.529987	4.88712e-11	2082.77	0.296471	0.00137721	2190.1	0.379712	Calmodulin 12	0.6305		unknown
CGI_10006532	0.21174	0.0354619	1023.14	0.579606	8.39237e-15	952.977	0.347508	2.82568e-05	1000.15	0.379618	actin cytoskeleton-regulatory complex pan1-like isoform X3	0.5374		unknown
CGI_10019462	0.240771	0.0103356	2534.56	0.609836	3.50895e-14	2362.83	0.284237	0.00144561	2550.72	0.378281	ETS-related transcription factor Elf-3	0.5685		GO:0005634;GO:0003700;GO:0006355;GO:0043565;GO:0009987;GO:0044767
CGI_10024479	0.340817	0.022738	125.535	0.352279	0.0287597	130.131	0.436173	0.00898329	124.44	0.376423	ran guanine nucleotide release factor	0.7165		unknown
CGI_10011047	0.384402	0.02827	2163.61	0.359472	0.0395875	2270	0.383195	0.0359845	2209.44	0.37569	Neuronal acetylcholine receptor subunit alpha-6	0.7115		GO:0034220;GO:0016021;GO:0005230
CGI_10023428	0.518971	8.05327e-10	367.512	0.377819	1.46044e-06	398.667	0.228314	0.0373654	409.956	0.375035	RNA polymerase I-specific transcription initiation factor RRN3	0.6345		GO:0065007;GO:0003743;GO:0006413
CGI_10017637	0.433494	1.02552e-12	1164.08	0.422053	2.53389e-07	1215.34	0.26918	0.00234887	1249.19	0.374909	amino acid transporter ANTL1-like isoform X1	0.6645		GO:0016021
CGI_10004583	0.487839	7.45268e-07	2715.4	0.34061	4.34195e-05	2954.81	0.293449	0.000198759	2940.5	0.373966	dispatched homolog 1-like	0.5915		GO:0016021;GO:0008158;GO:0007224
CGI_10008821	0.303328	0.000934666	1178.27	0.590425	2.82883e-17	1127.12	0.228122	0.000106036	1231.63	0.373958	DNA ligase 1-like	1		unknown
CGI_10022831	0.393886	0.000104469	454.085	0.42533	0.000215718	467.688	0.302202	0.00289896	476.429	0.373806	Uncharacterized protein C12orf56	0.6515		unknown
CGI_10024638	0.301206	1.1664e-07	2748.96	0.412869	8.58399e-10	2764.15	0.404971	9.52545e-13	2717.55	0.373015	Kyphoscoliosis peptidase	0.691		unknown
CGI_10012246	0.225527	0.0261889	455.933	0.508097	4.81625e-07	434.908	0.383907	0.000478654	442.533	0.37251	Hermansky-Pudlak syndrome 3 homolog	0.5395		unknown
CGI_10021080	0.298015	2.70785e-05	455.612	0.427207	9.27802e-08	455.505	0.386123	6.02053e-07	452.347	0.370448	Mitochondrial folate transporter carrier	0.749		GO:0055085;GO:0016021
CGI_10024872	0.240186	0.000262666	415.968	0.495746	9.73642e-09	400.189	0.374874	1.6702e-08	406.893	0.370269	biogenesis of lysosome-related organelles complex 1 subunit 6	0.7585		unknown
CGI_10010800	0.283831	0.00489956	259.659	0.281868	0.000681355	270.33	0.540041	6.22689e-11	245.362	0.36858	Laminin subunit beta-1	0.8517		unknown
CGI_10012714	0.349417	0.0298758	314.015	0.370983	0.0151098	324.889	0.383229	0.0164938	317.393	0.367876	leucine-rich repeat-containing C10orf11 homolog [Biomphalaria glabrata]	0.7395		unknown
CGI_10003512	0.388925	7.83572e-07	323.21	0.180628	0.0292702	359.053	0.533714	7.02769e-11	316.018	0.367755	SMG5-like isoform X2 [Crassostrea gigas]	0.745		GO:0044424;GO:0031323;GO:0019899
CGI_10026470	0.426655	1.82047e-05	337.62	0.268277	0.00557698	369.013	0.402851	0.000351666	346.826	0.365928	secernin-2-like [Priapulus caudatus]	0.583		GO:0016805;GO:0006508
CGI_10028051	0.581629	6.26665e-08	373.827	0.240828	0.0219412	431.216	0.269154	0.00715415	418.944	0.36387	Multiple epidermal growth factor-like domains 11	0.5785		unknown
CGI_10026908	0.349797	7.71407e-09	428.968	0.470319	1.04492e-12	430.125	0.269572	0.000195555	448.355	0.363229	magnesium transporter NIPA2-like isoform X3 [Lingula anatina]	0.85		GO:0015693;GO:0016021;GO:0015095;GO:1903830
CGI_10013991	0.289259	4.87679e-05	2580.62	0.576312	2.31872e-29	2467.45	0.223382	0.00299159	2689.13	0.362984	AGAP002157-PA [Anopheles gambiae PEST]	0.5755		GO:0005509;GO:0016021;GO:0007156;GO:0005576;GO:0005886;GO:0008063
CGI_10024852	0.30935	0.00398159	678.769	0.266555	0.0174108	715.61	0.510295	1.2578e-06	651.884	0.362067	leucine-rich repeat-containing 40-like [Aplysia californica]	0.709		GO:0008063
CGI_10013805	0.375015	0.0134542	807.847	0.375651	0.0326638	839.522	0.334398	0.0272911	834.63	0.361688	Peroxisomal acyl-coenzyme A oxidase 3	0.8015		GO:0003995;GO:0005777;GO:0033539;GO:0000062;GO:0050660;GO:0009055;GO:0052890;GO:0055088;GO:0016402
CGI_10025490	0.477023	6.26374e-06	457.779	0.355684	0.00151024	494.236	0.248865	0.0146126	501.088	0.360524	cereblon homolog	0.609		unknown
CGI_10008953	0.320779	0.0118772	1093.16	0.496226	3.21281e-06	1079.56	0.261082	0.00981844	1137.58	0.359362	[Nematostella vectensis]	0.64		unknown
CGI_10024489	0.32931	0.0152336	82.3115	0.307566	0.028229	86.0423	0.437747	0.0012361	81.3126	0.358208	Zinc finger HIT domain-containing 3	0.693		unknown
CGI_10009378	0.261062	0.0193898	293.502	0.436421	9.12882e-06	289.545	0.376594	1.34343e-05	289.081	0.358026	Major facilitator superfamily domain-containing 8	0.788		GO:0055085;GO:0043231;GO:0016021
CGI_10008900	0.468897	5.55689e-07	2739.31	0.189334	0.0415263	3109.16	0.412639	6.12482e-07	2843.48	0.356957	cysteine-rich and transmembrane domain-containing 1-like	0.9933		GO:0016021
CGI_10008026	0.44572	6.32634e-05	1454.58	0.278468	0.0268279	1593.43	0.344777	0.00785848	1530.3	0.356322	hypothetical protein CGI_10008026	0.4795		GO:0016021
CGI_10014725	0.388406	0.000684706	921.247	0.441987	2.50267e-05	943.196	0.238378	0.0323582	985.013	0.356257	dynein regulatory complex 1	0.734		GO:0005856;GO:0005929;GO:0001539
CGI_10023094	0.378437	1.7421e-05	252.487	0.467261	2.17639e-07	255.722	0.207116	0.0337673	271.861	0.350938	hypothetical protein CGI_10023094	0.96		GO:0016021
CGI_10003509	0.365674	0.0407769	657.75	0.423047	0.000915467	673.892	0.262787	0.0436095	694.681	0.350503	Integrin beta-3	0.609		GO:0007229;GO:0016020
CGI_10007292	0.233457	0.0395244	150.689	0.438176	9.83347e-05	147.089	0.379535	0.00163863	146.93	0.350389	uncharacterized threonine-rich GPI-anchored glyco -like	0.7675		GO:0016021
CGI_10011338	0.421451	8.18052e-10	929.145	0.368267	4.38485e-06	982.04	0.261322	0.00269758	996.017	0.350347	nuclear pore complex Nup160-like	0.594		unknown
CGI_10021099	0.44447	3.38292e-10	666.183	0.323023	0.000145153	718.469	0.282989	0.000308126	713.463	0.350161	palmitoyltransferase ZDHHC18-like isoform X1	0.8125		GO:0008270;GO:0019706;GO:0008152;GO:0016021
CGI_10003330	0.373425	0.0016973	127.154	0.42008	0.0018038	130.466	0.255655	0.035253	134.652	0.34972	Methyltransferase 10	0.755		GO:0005737;GO:0018022;GO:0016279
CGI_10011155	0.363069	0.00036122	425.568	0.393947	1.55901e-07	438.783	0.290311	0.002652	443.844	0.349109	Leucine-rich repeat-containing 45	0.703		GO:0005813;GO:0005515;GO:0005737;GO:0005886;GO:0005654;GO:0008063
CGI_10006785	0.391709	2.81154e-12	2408.52	0.340967	3.68043e-11	2545.64	0.314507	7.3026e-11	2516.48	0.349061	serine arginine repetitive matrix 1-like isoform X3	0.7615		GO:0005509
CGI_10020297	0.217756	0.0220416	1705.13	0.609623	9.16653e-14	1578.28	0.219557	0.0480725	1738.81	0.348979	Usherin	0.523		GO:0005524;GO:0016021;GO:0044464;GO:0004672;GO:0006468;GO:0032501
CGI_10017868	0.303643	0.00192678	243.85	0.290699	0.000353943	254.756	0.451009	1.67232e-06	237.801	0.34845	gephyrin-like isoform X2	0.8005		GO:0060077;GO:0008270;GO:0061598;GO:0061599;GO:0006777;GO:0000166;GO:0045184;GO:0030425;GO:0005515;GO:0097112;GO:0005737;GO:0045211;GO:0031234;GO:0072579;GO:0018315
CGI_10025532	0.474097	5.93358e-14	1390.98	0.286472	0.00418947	1531.14	0.279146	1.92017e-05	1505.19	0.346572	Acid sphingomyelinase-like phosphodiesterase 3b	0.631		GO:0016020;GO:0008152;GO:0016787
CGI_10006313	0.249499	0.00865315	211.464	0.433375	1.36667e-06	207.9	0.354021	0.000561897	208.875	0.345632	transferase mitochondrial	0.569		GO:0008152;GO:0016740
CGI_10005111	0.193001	0.0316777	574.919	0.35419	1.02419e-05	568.677	0.487087	1.06612e-09	535.939	0.344759	solute carrier family 26 member 6-like [Lingula anatina]	0.7315		GO:0008271;GO:0016021;GO:1902358
CGI_10003391	0.251964	0.000306926	355.83	0.369736	1.11931e-07	356.807	0.408254	2.38675e-09	346.089	0.343318	zinc finger 76-like isoform X3 [Lingula anatina]	0.674		GO:0003676;GO:0046872
CGI_10020540	0.269655	0.014348	4911.56	0.525081	3.22375e-13	4735.65	0.232392	0.00115172	5074.18	0.342376	balbiani ring 3-like	0.4842		unknown
CGI_10027375	0.470961	2.00101e-14	572.13	0.353919	3.21979e-10	616.5	0.195125	0.0122505	635.793	0.340002	Gamma-tubulin complex component 6	0.666		GO:0015631;GO:0005815;GO:0006461;GO:0000280;GO:0000922;GO:0022402;GO:0090063;GO:0000226
CGI_10009921	0.386128	2.65447e-06	1785.38	0.364519	2.72466e-06	1870.01	0.261955	0.000987384	1893.25	0.337534	dynein regulatory complex subunit 7-like	0.8315		unknown
CGI_10021300	0.310813	7.54692e-08	1288.51	0.415236	8.53952e-10	1298.62	0.283406	9.93986e-06	1325.98	0.336485	Glutamine-rich 2	0.7825		unknown
CGI_10025447	0.323373	0.0145033	1741.16	0.350661	0.00385668	1796.55	0.332096	0.0121207	1771.33	0.335377	multidrug resistance-associated 1-like isoform X1	0.7545		GO:0005524;GO:0042626;GO:0055085;GO:0008152;GO:0016021
CGI_10008372	0.358138	0.000210091	290.673	0.376482	1.5679e-05	300.583	0.270115	0.00388957	304.918	0.334912	ADP-ribosylation factor 13B	0.74		GO:0005525;GO:0009790;GO:0007264;GO:0044441;GO:0035295;GO:0042384;GO:0007420;GO:0060429;GO:0003002;GO:0016477;GO:0005622;GO:0007368
CGI_10022079	0.294337	0.0118955	560.599	0.334185	0.00202568	576.041	0.365688	0.00171853	559.331	0.331403	3-keto-steroid reductase	0.7265		GO:0016491;GO:0055114
CGI_10011726	0.32185	0.00355094	197.896	0.310444	0.00108787	206.729	0.356479	0.000209456	199.802	0.329591	transmembrane 145 [Trichogramma pretiosum]	0.681		GO:0007186;GO:0016021;GO:0019236
CGI_10024608	0.412512	4.84169e-05	215.124	0.306108	0.0013931	231.596	0.262977	0.00282782	230.062	0.327199	tRNA-dihydrouridine(47) synthase [NAD(P)(+)]-like	0.705		GO:0017150;GO:0002943;GO:0046872;GO:0050660;GO:0055114
CGI_10010140	0.374912	5.16117e-13	793.281	0.261011	6.29642e-05	854.912	0.343727	9.21288e-11	817.02	0.32655	transcription initiation SPT3 homolog	0.7245		GO:0003677;GO:0005669;GO:0003712;GO:0046982;GO:0006366;GO:0016573;GO:0000124;GO:0006357
CGI_10023083	0.177058	0.0296762	324.479	0.19599	0.0312862	335.598	0.604131	1.39709e-13	291.06	0.325726	PREDICTED: uncharacterized protein LOC105330591 [Crassostrea gigas]	0.657		unknown
CGI_10025807	0.306235	0.000425515	948.826	0.254282	0.0110372	1003.38	0.414729	1.1475e-06	936.534	0.325082	GTP-binding 1 [Trichogramma pretiosum]	0.846		GO:0005525;GO:0003924;GO:0008152
CGI_10015959	0.522384	8.87348e-10	1440.77	0.217477	0.00599629	1645.11	0.234179	0.00284514	1604.6	0.32468	Laminin subunit beta-1	0.727		GO:0008063
CGI_10007096	0.288563	0.00499034	492.279	0.373419	1.92184e-05	499.138	0.310903	0.00140734	498.917	0.324295	1-phosphatidylinositol 4,5-bisphosphate phosphodiesterase epsilon-1-like	0.7625		GO:0004435;GO:0007264;GO:0005085;GO:0006629;GO:0004871;GO:0005622;GO:0043547
CGI_10024180	0.49542	4.96648e-15	1380.61	0.28309	2.02434e-07	1531.85	0.186483	0.000903145	1549.05	0.321664	pre-rRNA-processing FHL1-like	0.7163		unknown
CGI_10014846	0.279318	0.0332516	222.244	0.295811	0.0132807	229.986	0.385369	0.00184837	219.656	0.320166	phosphoribosylformylglycinamidine synthase	0.7925		GO:0005524;GO:0005737;GO:0006189;GO:0006541;GO:0004642
CGI_10018109	0.411244	3.27487e-12	994.98	0.379266	9.01211e-08	1045.46	0.166764	0.0225731	1095.83	0.319091	serine arginine repetitive matrix 2-like isoform X9	0.9705		unknown
CGI_10020890	0.309577	1.53268e-10	4318.02	0.281036	1.53839e-06	4532.71	0.354824	4.52311e-12	4345.4	0.315146	pre-mRNA-processing-splicing factor 8	0.973		GO:0000386;GO:0017070;GO:0030623;GO:0097157;GO:0071013;GO:0030619;GO:0005682;GO:0030620;GO:0000244
CGI_10014243	0.336955	8.0114e-10	3961.48	0.399796	2.51436e-12	4044.58	0.205429	0.0191305	4212.5	0.31406	mechanosensory 2-like isoform X1	0.9085		GO:0016021
CGI_10025035	0.28919	0.0213118	109.082	0.32371	0.0227113	112.292	0.327243	0.0222922	109.64	0.313381	ETS translocation variant 1 isoform X2 [Myotis lucifugus]	0.593		GO:0005634;GO:0003700;GO:0006355;GO:0043565;GO:0009987;GO:0044767
CGI_10013803	0.318392	0.0213713	722.933	0.343962	0.0239855	745.665	0.277743	0.0491336	746.885	0.313366	Peroxisomal acyl-coenzyme A oxidase 3	0.814		GO:0003995;GO:0005777;GO:0033539;GO:0000062;GO:0050660;GO:0009055;GO:0052890;GO:0055088;GO:0016402
CGI_10018124	0.396538	4.45007e-05	391.641	0.257128	0.00864332	425.504	0.286232	0.0139646	413.134	0.313299	RIIa domain-containing 1-like	0.791		unknown
CGI_10024267	0.293144	3.93367e-05	545.731	0.252705	0.0117781	575.33	0.39263	2.48453e-05	540.299	0.312826	probable RNA-binding 19	0.712		GO:0000166;GO:0003676
CGI_10023772	0.354412	6.12662e-05	405.683	0.207406	0.0042197	442.163	0.373514	1.2613e-05	411.509	0.311777	transmembrane 165	0.8155		GO:0016021
CGI_10006397	0.424983	3.07899e-13	685.583	0.318272	3.8403e-08	736.476	0.187462	0.00211124	753.039	0.310239	transcription initiation factor TFIID subunit 2-like	0.817		GO:0003743;GO:0008270;GO:0005669;GO:0001075;GO:0006508;GO:0044212;GO:0001129;GO:0043565;GO:0003682;GO:0006413;GO:0045944;GO:0008237
CGI_10005720	0.266425	1.45897e-07	2061.94	0.389495	1.84592e-09	2064.62	0.274368	1.93209e-07	2098.24	0.310096	splicing factor 3B subunit 2-like	0.874		GO:0005689;GO:0071013;GO:0071011;GO:0005684;GO:0005686;GO:0000398
CGI_10025433	0.22933	0.00417223	2106.28	0.451744	2.10693e-11	2047.19	0.244052	0.00543045	2138.82	0.308375	single-stranded DNA-binding 3-like isoform X1 [Octopus bimaculoides]	0.7345		GO:0003697
CGI_10016213	0.191465	0.00822808	1574.99	0.34238	2.16892e-05	1562.45	0.389958	2.89719e-10	1510.51	0.307934	probable serine threonine- kinase pats1 isoform X1 [Crassostrea gigas]	0.6515		GO:0005525;GO:0007264;GO:0005622;GO:0008063
CGI_10017381	0.217126	0.0103573	1460.3	0.45287	5.64229e-09	1413.07	0.253786	0.00400359	1472.74	0.307927	multiple epidermal growth factor-like domains 6	0.4705		GO:0004725;GO:0035335
CGI_10018900	0.44893	1.674e-08	230.834	0.190393	0.0354174	260.152	0.278679	0.00190253	248.172	0.306001	EGF domain-specific O-linked N-acetylglucosamine transferase [Ficedula albicollis]	0.7105		GO:0016757;GO:0008152
CGI_10019919	0.397806	4.19679e-08	707.725	0.242205	0.00518839	773.115	0.276313	0.00164687	749.772	0.305441	SEC14 1	0.773		GO:0098772;GO:0015871;GO:0039552;GO:0016021;GO:0005794;GO:0039536;GO:0005215
CGI_10020063	0.322598	2.62686e-07	733.852	0.304536	4.02495e-06	767.95	0.288215	7.72265e-06	756.994	0.305116	F-box LRR-repeat 5	0.575		GO:0008063
CGI_10017125	0.349167	6.88305e-05	658.964	0.324131	0.000218857	690.99	0.237777	0.0238267	696.095	0.303692	C2 domain-containing 3	0.609		unknown
CGI_10018529	0.27122	0.0186327	272.309	0.399115	0.0069022	271.893	0.236199	0.0404598	280.928	0.302178	hypothetical protein CGI_10018529	1		unknown
CGI_10020330	0.268119	0.000266769	449.775	0.409982	8.42245e-09	447.834	0.217232	0.0230064	466.067	0.298444	Inositol polyphosphate multikinase	0.684		GO:0005634;GO:0008440;GO:0016310
CGI_10024402	0.27386	0.00115756	275.59	0.437771	1.5163e-07	272.888	0.181833	0.0388311	289.619	0.297821	tetratricopeptide repeat 39C	0.7075		GO:0048856;GO:0044767
CGI_10011810	0.170248	0.0186933	666.185	0.320811	0.000168484	660.332	0.399022	0.000106332	631.757	0.296694	WD repeat-containing 26-like	0.8295		GO:0005737;GO:0005654
CGI_10014975	0.342797	2.63075e-06	821.259	0.243746	0.00171357	881.501	0.301816	3.70405e-05	848.86	0.29612	B-cell CLL lymphoma 9 -like isoform X1 [Lingula anatina]	0.5795		unknown
CGI_10012610	0.259107	0.000883934	14233	0.30869	4.47637e-05	14580.6	0.316219	0.000235061	14261.3	0.294672	isocitrate dehydrogenase	0.88		GO:0000287;GO:0051287;GO:0004450;GO:0006102;GO:0006099
CGI_10015777	0.1806	0.0467313	561.15	0.410574	2.0064e-06	543.303	0.291716	0.000420928	552.718	0.294296	sodium- and chloride-dependent glycine transporter 1-like	0.784		GO:0005887;GO:0006836;GO:0005328;GO:0055085
CGI_10021126	0.286414	0.000576457	586.529	0.372531	1.31861e-06	594.266	0.222135	0.0123639	610.773	0.293693	[Nematostella vectensis]	0.6045		unknown
CGI_10009342	0.360354	0.000236147	373.156	0.235045	0.0125207	403.866	0.280759	0.0375845	390.023	0.292053	partial [Nematostella vectensis]	0.65		unknown
CGI_10028266	0.362436	2.44533e-05	880.738	0.193872	0.0409298	966.348	0.315272	0.000430949	911.778	0.290527	charged multivesicular body 2b	0.817		GO:0007034;GO:0005622
CGI_10015143	0.313	0.000136949	276.144	0.355406	9.56192e-06	283.589	0.201853	0.0105165	291.907	0.290086	O-linked-mannose beta-1,2-N-acetylglucosaminyltransferase 1-like	0.7265		GO:0008375;GO:0016020;GO:0006486
CGI_10023186	0.305207	1.18101e-05	464.244	0.385092	3.70317e-08	471.364	0.179724	0.0100111	492.753	0.290008	RING finger and SPRY domain-containing 1-like [Nasonia vitripennis]	0.635		unknown
CGI_10022142	0.291328	1.41835e-07	593.902	0.276788	1.62641e-06	620.795	0.30111	1.23831e-07	604.197	0.289742	NAD kinase-like isoform X12 [Diaphorina citri]	0.854		GO:0003951;GO:0019674;GO:0016310;GO:0006741
CGI_10016160	0.374013	3.85756e-06	258.747	0.25571	0.0020403	279.278	0.233628	0.00389667	275.758	0.287784	Cytidine deaminase	0.577		GO:0016310;GO:0016301;GO:0005622;GO:0035556
CGI_10028749	0.247172	0.0115827	218.452	0.224136	0.00810769	228.999	0.392042	3.46182e-05	213.027	0.287783	chondroitin sulfate N-acetylgalactosaminyltransferase 1-like [Crassostrea gigas]	0.728		GO:0016020;GO:0016740
CGI_10010452	0.243798	0.00383843	2043.5	0.351434	4.41676e-05	2055.55	0.26634	0.00263945	2069.65	0.287191	chitin synthase	0.693		GO:0016459;GO:0005524;GO:0008152;GO:0003774
CGI_10012376	0.204209	0.00212379	1458.11	0.333901	6.54456e-10	1456.47	0.322048	1.63385e-07	1433.36	0.286719	Dynamin- partial	0.6905		GO:0005525;GO:0003924;GO:0008152
CGI_10020641	0.223951	0.0114024	542.736	0.32168	2.6548e-05	547.51	0.310056	0.000662457	539.032	0.285229	Transducin beta 3	0.746		GO:0032040;GO:0000462;GO:0030515;GO:0034388
CGI_10018111	0.299999	0.000423909	376.928	0.358204	4.53327e-07	385.308	0.190884	0.0366895	398.098	0.283029	serine arginine repetitive matrix 2-like isoform X9	1		unknown
CGI_10010482	0.260169	0.0026754	608.786	0.360562	3.6615e-06	614.081	0.22807	0.0068878	627.845	0.282934	kelch 24 [Crassostrea gigas]	0.5775		unknown
CGI_10020483	0.261529	0.00135294	609.452	0.293169	0.00036152	627.709	0.288595	0.000170358	616.737	0.281098	TALPID3 -like	0.514		GO:0007224
CGI_10024435	0.224331	0.0220107	490.426	0.313523	0.000269325	496.16	0.305106	0.00697441	487.481	0.280987	Golgin subfamily A member 1	0.5655		unknown
CGI_10022984	0.322942	8.52672e-05	713.443	0.199284	0.0210126	772.057	0.320709	3.90168e-07	728.615	0.280978	myotubularin-related 9	0.7795		unknown
CGI_10004590	0.273251	0.00844654	3058.52	0.370548	6.09128e-07	3088.91	0.194625	0.00954665	3201.38	0.279474	pro convertase subtilisin kexin type 5-like	0.515		GO:0016021
CGI_10005390	0.275728	0.00103758	246.384	0.287836	0.000361322	255.389	0.273433	0.00202025	251.262	0.278999	transcription elongation factor A N-terminal and central domain-containing 2	0.709		GO:0005634;GO:0003677;GO:0005515;GO:0006351;GO:0005272;GO:0016021;GO:0035725
CGI_10025280	0.258439	6.03656e-08	1837.32	0.365756	8.98642e-14	1849.02	0.207952	8.61592e-06	1904.84	0.277382	dynamin-binding -like	0.7195		GO:0035023;GO:0005737;GO:0005089;GO:0035556;GO:0043547
CGI_10004457	0.22448	0.0341481	881.663	0.391421	1.56517e-06	871.348	0.215926	0.0458233	902.505	0.277276	spermatogenesis-associated 20-like isoform X2	0.7584		GO:0006508;GO:0006915;GO:0004197
CGI_10023380	0.361226	1.64639e-06	360.61	0.273384	6.84571e-05	385.244	0.191431	0.0126189	387.915	0.275347	NEDD1 [Pteropus alecto]	0.599		GO:0000242;GO:0044763
CGI_10014662	0.451398	8.7438e-08	2467.78	0.183983	0.0197643	2790.43	0.182605	0.0241203	2737.85	0.272662	FYN-binding isoform X2 [Sarcophilus harrisii]	0.79		unknown
CGI_10003816	0.285299	2.50356e-08	3020.63	0.295646	2.44067e-07	3132.6	0.236479	0.000260946	3129.63	0.272475	cytoplasmic dynein 2 heavy chain 1 isoform X1	0.8515		GO:0016887;GO:0007030;GO:0005794;GO:0005930;GO:0005874;GO:0008105;GO:0009953;GO:0005524;GO:0030326;GO:0097542;GO:0070062;GO:0030900;GO:0045177;GO:0042384;GO:0030286;GO:0005829;GO:0031512;GO:0019886;GO:0021522;GO:0060976;GO:0005886;GO:0007368;GO:0003777;GO:0006888;GO:0045880;GO:0016485;GO:0035721
CGI_10008997	0.162452	0.0295328	2342.46	0.355155	1.0324e-08	2293.45	0.298533	4.49283e-05	2288.4	0.272047	hypothetical protein CGI_10008997	0.94		unknown
CGI_10019204	0.23196	0.00277932	4298.61	0.167299	0.00493192	4568.57	0.415975	3.71233e-13	4145.51	0.271745	type 2 phosphatidylinositol 4,5-bisphosphate 4-phosphatase	0.6315		GO:0016020
CGI_10000877	0.425513	1.95444e-09	634.388	0.184767	0.0469286	711.759	0.203562	0.0191637	693.559	0.271281	Multiple epidermal growth factor-like domains 6	0.601		GO:0046872;GO:0016021
CGI_10003448	0.406364	2.68699e-14	661.675	0.260737	0.000755375	719.968	0.14363	0.0168502	733.584	0.270244	WD and tetratricopeptide repeats 1-like	0.7355		unknown
CGI_10008008	0.22228	0.00196094	852.901	0.325132	5.34288e-06	859.603	0.257906	1.72648e-05	860.987	0.268439	protocadherin-9-like [Crassostrea gigas]	0.6635		GO:0005509;GO:0016021;GO:0007156;GO:0005886
CGI_10009091	0.254838	0.0124424	474.489	0.289681	0.00723939	488.39	0.260431	0.0393763	483.148	0.268317	Zinc finger with UFM1-specific peptidase domain	0.6925		GO:0046872
CGI_10014681	0.364107	9.55137e-07	544.726	0.205994	0.0335738	595.411	0.234404	0.00889774	578.722	0.268168	WAS family homolog 1-like	0.74		GO:0034394;GO:0040038;GO:0031083;GO:0043015;GO:0043014;GO:0043553;GO:0005776;GO:0005769;GO:0005813;GO:0002468;GO:0001556;GO:1990126;GO:0010507;GO:0042098;GO:0034314;GO:0055037;GO:0031396;GO:0071203;GO:0090306;GO:0050776
CGI_10024802	0.235481	0.000245912	721.287	0.300233	7.55293e-07	735.258	0.266917	4.42895e-06	728.535	0.267543	lung adenoma susceptibility 2	0.5665		unknown
CGI_10027212	0.290107	1.55403e-09	1197.88	0.359555	9.45597e-11	1219.84	0.149906	0.00397053	1278.71	0.266523	intraflagellar transport 80 homolog	0.8745		GO:0005813;GO:0031514;GO:0042384;GO:0030992
CGI_10014056	0.303999	0.000977425	621.473	0.257276	0.00330909	656.359	0.230711	0.00814666	649.025	0.263995	atrial natriuretic peptide receptor 1-like	0.6565		GO:0004568;GO:0005975;GO:0008061;GO:0006032;GO:0016021;GO:0005576
CGI_10002790	0.225075	9.04511e-05	1269.29	0.374321	1.98106e-09	1260.84	0.190083	0.00110102	1310.01	0.263159	PHD finger 14-like	0.67		GO:0008270
CGI_10006129	0.247917	0.000790911	1295.65	0.226032	0.000597661	1357.82	0.312843	3.42944e-07	1295.66	0.262264	tetraspanin-13 isoform X2	0.736		GO:0016021
CGI_10021512	0.290344	0.000392438	793.814	0.188286	0.0266082	853.498	0.300083	0.00079163	807.384	0.259571	probable splicing factor 3B subunit 5	0.9575		GO:0005689;GO:0071011;GO:0016021;GO:0005686;GO:0000398
CGI_10003154	0.229546	0.00474092	1395.25	0.339596	1.02473e-13	1403.21	0.202693	0.00716992	1436.49	0.257278	PREDICTED: uncharacterized protein LOC105347486 [Crassostrea gigas]	1		GO:0016021
CGI_10009469	0.344494	7.5482e-06	705.858	0.171053	0.0210923	776.457	0.252159	0.00100887	741.384	0.255902	dentin sialophospho -like isoform X3	0.6375		unknown
CGI_10028384	0.211851	0.00229071	514.587	0.243189	0.000416162	529.655	0.311853	4.70716e-06	508.36	0.255631	phosphoglucomutase-2-like [Crassostrea gigas]	0.7195		GO:0000287;GO:0005975;GO:0016868;GO:0005829
CGI_10010040	0.218775	0.0214326	375.003	0.266242	0.003211	384.124	0.276191	0.00149668	375.663	0.253736	ATP-dependent zinc metalloprotease YME1L1-like [Biomphalaria glabrata]	0.6915		GO:0005524;GO:0016020;GO:0006508;GO:0004222;GO:0009987;GO:0042623
CGI_10023567	0.176681	0.00358748	7786.69	0.268252	8.12526e-06	7868.73	0.314407	2.52465e-05	7604.08	0.253113	soma ferritin [Aplysia californica]	0.636		GO:0006879;GO:0005623;GO:0008199;GO:0006826;GO:0055114;GO:0004322
CGI_10016246	0.297401	4.7796e-06	1569.73	0.299098	5.27315e-08	1632.79	0.157555	0.0366225	1674.85	0.251351	Exocyst complex component 2	0.7255		GO:0006893;GO:0000145
CGI_10020917	0.355569	2.66252e-11	1283.89	0.213298	0.00025418	1396.4	0.184836	0.000662092	1382.11	0.251235	BAI1-associated 3	0.7135		unknown
CGI_10002098	0.191548	0.0222394	425.831	0.15899	0.0499137	447.783	0.400764	2.90261e-05	406.792	0.250434	nucleolin 2-like	0.92		unknown
CGI_10002296	0.292227	3.3669e-06	1036.32	0.280083	7.1863e-08	1082.77	0.178467	0.00528523	1096.68	0.250259	F-box only 36-like	0.67		unknown
CGI_10022553	0.188138	0.00187563	587.291	0.302446	6.66756e-08	589.321	0.257436	8.91066e-06	586.116	0.24934	Bardet-Biedl syndrome 7 homolog isoform X1	0.817		GO:0060255;GO:0035058;GO:0034464;GO:0036064;GO:0009396;GO:0046907;GO:0015031;GO:0005930;GO:0004488;GO:0007369;GO:0005737;GO:0070121;GO:0016021;GO:0001947;GO:0055114;GO:0033339;GO:0051877;GO:0080090;GO:0031323;GO:0032402
CGI_10002789	0.225742	0.0350553	1153.67	0.291752	0.00186251	1175.92	0.226485	0.0130753	1177.3	0.247993	PHD finger 14	0.54		GO:0008270
CGI_10009092	0.368041	6.59843e-08	4103.37	0.214239	0.000552171	4481.15	0.151908	0.044122	4484.12	0.244729	Filamin- partial	0.575		unknown
CGI_10004786	0.289378	6.54481e-05	1334.5	0.285574	4.5233e-05	1390.71	0.157093	0.0154491	1421.43	0.244015	dynein heavy chain axonemal-like	0.8095		GO:0005524;GO:0003777;GO:0008152;GO:0030286;GO:0007018
CGI_10003849	0.293792	0.000288336	505.437	0.247381	0.00119997	533.716	0.18868	0.0405682	533.287	0.243285	PREDICTED: uncharacterized protein LOC105334697	0.66		unknown
CGI_10021217	0.375165	3.07012e-13	889.831	0.14196	0.00599043	997.328	0.211388	0.000191193	955.661	0.242838	Nuclear RNA export factor 1	0.665		GO:0000166;GO:0006406;GO:0044428;GO:0003723;GO:0005737
CGI_10020911	0.188982	0.0211268	850.79	0.229225	0.00183895	873.992	0.302452	0.000308126	837.015	0.24022	IQ domain-containing E-like	0.664		unknown
CGI_10027263	0.184413	0.000569443	1043.36	0.300487	2.63243e-08	1046.15	0.232367	0.000108306	1048.42	0.239089	N-alpha-acetyltransferase auxiliary subunit isoform X2	0.8165		unknown
CGI_10013234	0.19455	0.0129362	404.426	0.341734	3.44824e-05	401.566	0.177041	0.020326	415.087	0.237775	multiple epidermal growth factor-like domains 9	0.562		GO:0005604;GO:0048731;GO:0016021;GO:0070831
CGI_10022124	0.1804	0.0143885	629.422	0.253822	0.000101628	639.634	0.272858	0.000550946	623.52	0.235693	Nuclear pore complex Nup88	0.625		GO:1902580;GO:0033036;GO:0071426;GO:0071702
CGI_10019004	0.261042	0.00460906	713.971	0.202005	0.0164967	757.136	0.238567	0.0149625	733.52	0.233871	sodium hydrogen exchanger 2-like isoform X1 [Lingula anatina]	0.751		GO:0015385;GO:0016021;GO:1902600;GO:0035725;GO:0006885
CGI_10009666	0.299639	0.00247143	269.156	0.198587	0.0491897	289.31	0.203352	0.0410086	283.321	0.233859	PREDICTED: uncharacterized protein LOC105333728 [Crassostrea gigas]	0.725		unknown
CGI_10011680	0.237315	0.000954887	942.746	0.312405	9.38822e-07	958.208	0.149848	0.0347593	989.688	0.233189	coiled-coil domain-containing 169-like [Lingula anatina]	0.7215		unknown
CGI_10008125	0.220184	0.01278	232.616	0.233964	0.0048054	240.772	0.242242	0.0167412	235.739	0.23213	transmembrane 168-A-like	0.6485		GO:0016021
CGI_10014590	0.166679	0.00124888	1070.08	0.310257	1.0815e-06	1063.32	0.215913	0.00673341	1073.92	0.23095	transcription factor 20-like	0.575		unknown
CGI_10024140	0.27265	2.63787e-05	423.562	0.146985	0.0245504	458.871	0.265805	0.000511846	433.029	0.22848	FAM220A isoform X1 [Monodelphis domestica]	0.631		unknown
CGI_10014726	0.216494	0.00438538	12131	0.230148	0.00159936	12567.5	0.231644	0.0235018	12314.4	0.226095	methenyltetrahydrofolate synthase domain-containing isoform X2	0.8305		GO:0000166;GO:0044822
CGI_10005199	0.19716	0.00116375	637.435	0.232904	8.79987e-05	655.697	0.246162	0.000143749	640.109	0.225409	Interleukin enhancer-binding factor 2	0.886		GO:0003677;GO:0005524;GO:0006955;GO:0003725;GO:0006351;GO:0045893;GO:0005730;GO:0016740
CGI_10013737	0.172761	0.0211315	737.987	0.176153	0.011883	767.041	0.325643	3.67921e-05	716.986	0.224852	kinesin KIF3B	0.83		GO:0016887;GO:0048839;GO:0060042;GO:0008152;GO:0016939;GO:0043584;GO:0007018;GO:0005874;GO:0008017;GO:0048793;GO:0005524;GO:0005813;GO:0003777;GO:0070062;GO:0030705;GO:0048884;GO:0016020;GO:0005929;GO:0030990;GO:0035845;GO:0017048;GO:0090307
CGI_10028289	0.22796	0.00971938	859.85	0.219683	0.0109677	897.159	0.226747	0.0183404	877.405	0.224797	Ankyrin repeat and MYND domain-containing 1	0.791		GO:0046872
CGI_10028742	0.220235	0.0182981	381.824	0.24155	0.00323898	394.847	0.205203	0.025388	391.693	0.222329	poly(ADP-ribose) glycohydrolase-like	0.7105		unknown
CGI_10018864	0.182407	0.00786264	7614.69	0.143844	0.014478	8025.1	0.333114	6.26982e-11	7409.01	0.219788	Ganglioside GM2 activator	0.6705		GO:0043085;GO:0008047;GO:0006689
CGI_10017611	0.283921	0.000260771	1080.23	0.1766	0.0202379	1163.2	0.198381	0.0353576	1132.42	0.219634	ankyrin repeat and EF-hand domain-containing 1	0.7085		GO:0005509
CGI_10027213	0.294448	5.66799e-05	347.692	0.168422	0.0158263	376.761	0.195711	0.0136129	365.882	0.219527	Putative uncharacterized protein CXorf58	0.731		unknown
CGI_10013992	0.296558	0.00502526	379.309	0.180238	0.0383668	409.933	0.181656	0.0487738	401.388	0.219484	hypothetical protein CGI_10013992	1		GO:0016021
CGI_10015685	0.353215	9.46038e-12	939.475	0.141575	0.0306464	1045.44	0.163417	0.0123694	1018.08	0.219402	protein-serine O-palmitoleoyltransferase porcupine	0.7535		GO:0019538;GO:0090501;GO:0004518;GO:0016021;GO:0044464;GO:0005488
CGI_10012407	0.297972	0.000292449	325.348	0.161739	0.0444065	353.795	0.193119	0.032132	343.443	0.21761	ras-related Rab-31-like	0.833		GO:0005525;GO:0006913;GO:0007264;GO:0003924;GO:0016020;GO:0008152;GO:0006886;GO:0005622
CGI_10027459	0.234165	0.00231546	333.134	0.180657	0.0204925	353.161	0.237919	0.0204083	339.281	0.217581	GON-4	0.588		GO:0003677;GO:0006355
CGI_10013960	0.166017	0.0487805	1897.78	0.274852	5.31866e-06	1907.57	0.209518	0.0032661	1909.79	0.216795	Transmembrane channel 7	0.709		GO:0016021
CGI_10007663	0.217312	0.0317933	3921.71	0.233351	0.0347054	4059.92	0.198525	0.049748	4026.89	0.216396	hypothetical protein CGI_10007663	1		unknown
CGI_10003850	0.187192	0.0101241	621.546	0.130441	0.0375121	658.919	0.330638	1.7393e-07	606.005	0.21609	N-acyl-phosphatidylethanolamine-hydrolyzing phospholipase D	0.6725		GO:0008270;GO:0008152;GO:0070290
CGI_10018072	0.201599	8.53879e-09	4865.13	0.154595	6.99264e-05	5140.41	0.291575	9.80527e-21	4824.21	0.215923	SET	0.9085		GO:0005634;GO:0006334
CGI_10013183	0.200876	0.0017581	1182.53	0.274231	5.15493e-06	1201.66	0.163681	0.0365135	1221.46	0.212929	coiled-coil domain-containing 158 isoform X1 [Peromyscus maniculatus bairdii]	0.668		unknown
CGI_10016337	0.237713	0.00196619	673.451	0.196108	0.00900319	710.205	0.195675	0.0209051	696.513	0.209832	paramyosin-like isoform X1 [Crassostrea gigas]	0.6325		unknown
CGI_10019299	0.181299	0.0225088	287.915	0.28	0.000518943	290	0.167691	0.0367293	295.062	0.209664	SH3 domain-binding 5-like	0.724		GO:0005737;GO:0061099;GO:0007498;GO:0009952;GO:0007301;GO:0042694;GO:0048644;GO:0005886;GO:0035556
CGI_10024396	0.171456	0.0228257	1679.95	0.314462	4.41039e-08	1670.47	0.138729	0.0477272	1732.64	0.208216	[Nematostella vectensis]	0.708		GO:0016021
CGI_10023537	0.127767	0.0312786	3445.09	0.225447	4.15113e-07	3472.81	0.259888	1.68054e-09	3368.16	0.204367	PR domain zinc finger 5-like [Crassostrea gigas]	0.537		GO:0003677;GO:0046872
CGI_10010511	0.146534	0.0375847	610.19	0.254936	0.000467529	612.665	0.185486	0.00379899	614.784	0.195652	Cytosolic carboxypeptidase 1	0.681		GO:0008270;GO:0005737;GO:0004181;GO:0021549;GO:0006508;GO:0044237
CGI_10018022	0.17696	2.15895e-05	2117.77	0.233345	9.78178e-05	2163.29	0.17279	0.00108082	2163.31	0.194365	tetratricopeptide repeat partial	0.708		GO:0016021
CGI_10001797	0.133744	0.0437032	9935.79	0.235557	0.00169488	9999.09	0.202903	0.00402118	9910.35	0.190735	disabled homolog 1-like isoform X1 [Crassostrea gigas]	0.6665		GO:0032502
CGI_10016675	0.155984	0.0321748	668.598	0.240717	0.00104861	676.833	0.162479	0.030321	680.67	0.186393	SH3 domain-binding 5-like isoform X1	0.756		GO:0005622;GO:0035556
CGI_10010267	0.20356	0.00190595	592.263	0.170509	0.00538451	622.757	0.176631	0.00362174	609.446	0.183567	TBC1 domain family member 23-like	0.7745		GO:0001817
CGI_10003423	0.278218	1.38543e-07	3538.9	0.133178	0.0322142	3859.16	0.119563	0.0498138	3801.63	0.176986	Kyphoscoliosis peptidase [Crassostrea gigas]	0.7115		unknown
CGI_10022928	0.11814	0.0265658	1578.41	0.183875	0.000380859	1606.92	0.225013	2.16449e-05	1555.71	0.175676	p63 p73	0.864		GO:0005634;GO:0003700;GO:0051262;GO:0006915;GO:0044212;GO:0006355
CGI_10024855	0.179452	0.00133272	1377.98	0.198111	0.00112137	1424.91	0.143311	0.0237889	1422.81	0.173625	protocadherin Fat 4-like	0.6115		GO:0016021
CGI_10022699	0.179538	0.0239896	1563.52	0.176206	0.0195447	1628.86	0.156897	0.0249447	1607.56	0.17088	centrosomal of 295 kDa-like isoform X15 [Crassostrea gigas]	0.931		unknown
CGI_10021762	0.160266	0.0220824	1505.39	0.133649	0.00901416	1580.66	0.182359	0.00104444	1525.07	0.158758	serine threonine- kinase LMTK2-like [Limulus polyphemus]	0.666		GO:0005524;GO:0004672;GO:0006468
CGI_10005495	0.15167	0.0234571	1419.62	0.136802	0.0252242	1484.55	0.18152	0.00417669	1434.75	0.156664	Low affinity cationic amino acid transporter 2	0.6565		GO:0009987
CGI_10014185	0.149192	0.0121551	2267.38	0.178622	0.00150706	2336.15	0.119233	0.00848374	2336.83	0.149016	lens fiber membrane intrinsic -like	0.6231		GO:0016021
CGI_10010629	0.139233	0.00306652	4229.47	0.150605	0.00134548	4384.55	0.139186	0.0202011	4315.91	0.143008	Phytanoyl- dioxygenase domain-containing 1 [Crassostrea gigas]	0.7225		GO:0051213;GO:0055114
CGI_10008527	-0.110817	0.0232738	2790.29	-0.117296	0.0142081	2910.34	-0.110965	0.0343395	2847.5	-0.113026	VWFA and cache domain-containing 1	0.6705		GO:0016021
CGI_10023988	-0.136441	0.00309132	1485.03	-0.128971	0.00382092	1541.08	-0.147322	0.0153706	1522.22	-0.137578	ectonucleoside triphosphate diphosphohydrolase 2-like isoform X4 [Crassostrea gigas]	0.631		GO:0008152;GO:0016021;GO:0016787
CGI_10006440	-0.148822	0.0164044	1353.73	-0.122473	0.0461617	1395.52	-0.163458	0.00549301	1389.01	-0.144918	tumor necrosis factor ligand superfamily member 10-like	0.6445		GO:0006955;GO:0050794;GO:0006915;GO:0016021;GO:0005164;GO:0043065;GO:0042981
CGI_10024289	-0.222181	7.05182e-06	12933.6	-0.122116	0.00552116	12970.5	-0.113496	0.0166656	12679.2	-0.152598	60S ribosomal L31	0.899		GO:0003735;GO:0002181;GO:0022625
CGI_10003923	-0.201687	8.40747e-05	8501.81	-0.118398	0.00253573	8579.67	-0.151882	0.00343271	8516.16	-0.157322	60S ribosomal L38	0.9655		GO:0033291;GO:0034463;GO:0042474;GO:0022625;GO:0006412;GO:0048318;GO:0006417;GO:0007605;GO:0003723;GO:0001501;GO:0005925;GO:0003735;GO:0001503
CGI_10020206	-0.228024	0.000924935	1844.8	-0.134483	0.00324041	1853.67	-0.134782	0.0441027	1818.47	-0.165763	FUN14 domain-containing 1	0.703		GO:0031307;GO:0000422
CGI_10011234	-0.171952	0.0315845	313.931	-0.182172	0.0192938	327.955	-0.176166	0.0267808	320.839	-0.176763	dipeptidyl peptidase 9 isoform X1	0.6215		GO:0006508;GO:0008236
CGI_10008593	-0.14261	0.0350465	444.188	-0.152466	0.0292244	463.745	-0.241922	0.000327554	469.916	-0.178999	AGAP000913-PA [Anopheles gambiae PEST]	0.7315		GO:0016021
CGI_10016515	-0.194136	0.00108845	975.748	-0.172759	0.00100929	1007.65	-0.179476	0.00429075	990.587	-0.182124	frizzled-9-like	0.712		GO:0004888;GO:0007275;GO:0016021;GO:0016055
CGI_10009326	-0.222512	4.97895e-05	19058	-0.189748	0.00229039	19591.2	-0.139263	0.0279301	18856.9	-0.183841	60S acidic ribosomal P1-like	0.9095		GO:0003735;GO:0005840;GO:0006414
CGI_10027697	-0.189036	0.00591742	2059.82	-0.229194	8.18464e-05	2175.11	-0.14545	0.028583	2067.88	-0.187893	ankyrin repeat and sterile alpha motif domain-containing 1B-like isoform X4	0.7305		unknown
CGI_10013700	-0.171074	0.00293745	2676.92	-0.279053	1.07118e-06	2899.98	-0.148663	0.0186908	2708.47	-0.199597	transcriptional enhancer factor TEF-1-like [Crassostrea gigas]	0.7235		GO:0005634;GO:0003700;GO:0006355
CGI_10009458	-0.148075	0.00700389	1165.46	-0.166025	0.00668424	1221.01	-0.285278	3.31428e-06	1252.02	-0.199793	beta-(1,2)-xylosyltransferase-like [Octopus bimaculoides]	0.651		GO:0016757;GO:0008152;GO:0016021
CGI_10018007	-0.182565	0.0160014	710.937	-0.211946	0.0289545	748.189	-0.227882	0.000834801	737.794	-0.207465	Receptor-type tyrosine- phosphatase N2	0.781		GO:0004725;GO:0016021;GO:0035335
CGI_10001850	-0.176088	0.00703362	803.826	-0.219237	0.0124958	849.851	-0.244132	0.00533879	841.267	-0.213152	Sortilin-related receptor	0.7363		GO:0016021
CGI_10016700	-0.194532	0.0227447	458.046	-0.220053	0.00460218	481.2	-0.234862	0.00606842	474.322	-0.216482	chromosome 17 open reading frame isoform CRA_a [Homo sapiens]	0.6275		GO:0005515
CGI_10018347	-0.250666	9.34451e-07	1373.63	-0.118894	0.0449759	1361.44	-0.298426	2.43187e-07	1427.28	-0.222662	transformer-2 homolog alpha-like isoform X2	0.925		GO:0000166;GO:0003676
CGI_10021697	-0.213286	0.000401848	557.577	-0.17919	0.0210268	572.74	-0.276837	0.000206701	582.801	-0.223105	myocyte-specific enhancer factor 2A-like isoform X1 [Aplysia californica]	0.5493		unknown
CGI_10009978	-0.195741	0.000780203	1318.33	-0.197591	0.00328762	1373.01	-0.279762	1.78483e-08	1388.75	-0.224365	cadherin-23-like isoform X1 [Lingula anatina]	0.5895		GO:0005509;GO:0016021;GO:0007156;GO:0005886
CGI_10022035	-0.19603	0.00189909	668.119	-0.196613	0.000789535	695.443	-0.284955	0.000500622	704.969	-0.225866	BTB POZ domain-containing KCTD3-like	0.7675		GO:0051260
CGI_10015439	-0.21945	0.0135672	453.975	-0.20714	0.0287669	470.054	-0.251871	0.0238972	469.068	-0.226154	caspase-3-like [Lingula anatina]	0.596		GO:0006508;GO:0006915;GO:0004197;GO:0043065;GO:0042981
CGI_10024609	-0.2862	1.46061e-07	850.065	-0.203852	5.58961e-05	857.631	-0.1894	0.000654228	836.434	-0.226484	GTPase-activating Rap Ran-GAP domain 3 isoform X2	0.868		GO:0051056;GO:0005096;GO:0043547
CGI_10000905	-0.169149	0.0162205	2745.08	-0.206063	0.00283995	2895.96	-0.335036	6.15452e-09	2981.88	-0.236749	Elongation factor 1 delta	0.7745		GO:0003746;GO:0006414;GO:0005853
CGI_10011210	-0.326615	1.2723e-05	875.603	-0.216211	0.00392202	873.125	-0.168788	0.0380866	841.182	-0.237205	Lysophosphatidylcholine acyltransferase 2	0.7695		GO:0016746;GO:0005509;GO:0008152;GO:0016021
CGI_10017565	-0.180705	0.0254419	981.314	-0.265301	0.000782245	1054.25	-0.265782	0.00121653	1033.99	-0.237263	Integrin alpha-4	0.5465		GO:0007229;GO:0007155;GO:0008305
CGI_10001050	-0.235259	0.00521032	1036.13	-0.305373	6.2406e-05	1107.57	-0.173722	0.0311189	1033.24	-0.238118	tyrosine- kinase transmembrane receptor ROR1-like isoform X1 [Biomphalaria glabrata]	0.774		GO:0005524;GO:0018108;GO:0004714;GO:0016021;GO:0007169
CGI_10012630	-0.324331	6.37325e-09	1244.83	-0.218609	3.20816e-05	1244.06	-0.17169	0.0166265	1198.7	-0.23821	phosphatidylinositol 3,4,5-trisphosphate 5-phosphatase 1-like isoform X2 [Aplysia californica]	0.6155		GO:0048585;GO:0044464;GO:0048523;GO:0016787;GO:0046856
CGI_10004004	-0.267051	0.00687557	235.175	-0.259337	0.00324137	243.973	-0.208857	0.0206201	234.805	-0.245082	tetraspanin-18-like [Crassostrea gigas]	0.651		GO:0016021
CGI_10001433	-0.239097	0.0199154	480.858	-0.325505	0.000449629	517.472	-0.202632	0.0284069	484.163	-0.255745	GTPase IMAP family member 2-like	0.8657		GO:0008270;GO:0006508;GO:0016021;GO:0004222
CGI_10021916	-0.439102	5.70927e-29	1342.91	-0.119426	0.0346663	1237.3	-0.216053	1.14473e-05	1257.43	-0.258194	Uncharacterized protein C3orf59	0.863		unknown
CGI_10013742	-0.20906	0.0199356	296.131	-0.266626	0.00532457	315.07	-0.303176	0.00103886	313.102	-0.259621	transport and Golgi organization 2 homolog	0.669		unknown
CGI_10008945	-0.227534	0.0247884	532.925	-0.282138	0.0230084	566.288	-0.273372	0.0258541	553.272	-0.261014	aldehyde dehydrogenase family 3 member B1-like	0.741		GO:0055114;GO:0016620
CGI_10001373	-0.212621	0.0378464	527.994	-0.295629	0.00395492	567.317	-0.275586	0.00297789	551.713	-0.261279	Inhibitor of nuclear factor kappa-B kinase subunit alpha	0.6295		GO:0005524;GO:0004672;GO:0006468;GO:0008063;GO:0050776
CGI_10019003	-0.153298	0.00729661	1168.28	-0.339946	5.9971e-09	1304.58	-0.291321	0.000281797	1255.44	-0.261522	PFC0760c-like isoform X1 [Octopus bimaculoides]	0.5305		unknown
CGI_10015283	-0.323507	0.00131131	478.874	-0.209904	0.007418	476.695	-0.253877	0.0023676	475.517	-0.262429	sodium- and chloride-dependent glycine transporter 1-like	0.6945		GO:0006836;GO:0005328;GO:0055085;GO:0016021
CGI_10013445	-0.257144	0.0185816	172.619	-0.278547	0.0147165	181.111	-0.269797	0.0194913	176.906	-0.268496	proton-coupled folate transporter-like	0.664		GO:0055085;GO:0016021
CGI_10008315	-0.335828	2.09671e-07	2472.69	-0.218573	0.000217654	2459.9	-0.259008	0.000188184	2449.58	-0.271137	sodium- and chloride-dependent glycine transporter 1-like	0.8005		GO:0006836;GO:0005328;GO:0055085;GO:0016021
CGI_10021833	-0.195998	0.0166236	300.284	-0.362854	6.72776e-06	332.799	-0.257282	0.00250963	313.332	-0.272045	pyridoxal-dependent decarboxylase domain-containing 2 isoform X2	0.7565		GO:0030170;GO:0019752;GO:0016831
CGI_10015181	-0.426163	2.73373e-17	1574.97	-0.219005	0.00256737	1512.71	-0.171619	0.00483979	1457.53	-0.272262	hypothetical protein CGI_10015181	0.6085		GO:0016021
CGI_10020580	-0.186777	0.0337766	518.73	-0.36064	2.99512e-06	576.509	-0.276816	0.00130249	547.088	-0.274744	ras-related Rab-20-like [Biomphalaria glabrata]	0.714		GO:0005525;GO:0006913;GO:0007264;GO:0043231;GO:0003924;GO:0016020;GO:0008152;GO:0044444;GO:0006886
CGI_10016964	-0.187288	0.0469344	11800	-0.396232	0.000328011	13316.6	-0.242681	0.0425895	12299.2	-0.2754	Tyrosine- phosphatase Lar	0.6525		GO:0004721;GO:0050794;GO:0016020;GO:0044464;GO:0007411;GO:0016311
CGI_10019713	-0.189303	0.00218151	474.359	-0.318261	6.79252e-05	518.295	-0.321835	2.33072e-05	509.029	-0.276466	pirin isoform X3 [Oreochromis niloticus]	0.809		unknown
CGI_10028145	-0.257626	0.0110284	514.119	-0.306337	0.00165098	545.163	-0.278217	0.0032836	528.665	-0.280727	ADAM 17-like protease	0.6005		GO:0008270;GO:0006508;GO:0004222
CGI_10014967	-0.260422	0.0128003	179.491	-0.254782	0.041856	186.504	-0.334115	0.00145926	188.558	-0.283106	major facilitator superfamily domain-containing 6 isoform X1 [Cephus cinctus]	0.596		GO:0016021
CGI_10025868	-0.224283	0.000914414	1339.29	-0.233783	6.5331e-05	1398.65	-0.397126	1.53659e-13	1460.14	-0.285064	Extended synaptotagmin-2	0.5025		unknown
CGI_10019149	-0.390787	3.93369e-06	347.716	-0.212816	0.0388118	337.832	-0.251724	0.0116401	336.261	-0.285109	eukaryotic translation initiation factor 4E type 3-like	0.793		GO:0003743;GO:0005737;GO:0006413
CGI_10015462	-0.212015	0.0413782	1477.88	-0.340721	0.000288345	1615.31	-0.303005	0.00224595	1560.91	-0.285247	25-hydroxyvitamin D-1 alpha mitochondrial	0.63		GO:0010033;GO:0050794;GO:0005506;GO:0016705;GO:0055114;GO:0004497;GO:0020037
CGI_10003184	-0.23846	0.0143538	393.672	-0.304731	0.000117885	419.954	-0.315012	0.000193549	413.494	-0.286068	[Nematostella vectensis]	0.543		unknown
CGI_10015073	-0.267938	0.000107121	750.642	-0.381469	1.48593e-05	816.951	-0.214273	0.00552333	750.748	-0.287894	extended synaptotagmin-1-like isoform X3	0.6825		unknown
CGI_10020680	-0.294838	2.0212e-06	5826.04	-0.274112	0.000117456	6015.87	-0.295142	7.47285e-06	5946.42	-0.288031	ribosome biogenesis NSA2 homolog	0.9505		GO:0000460;GO:0000470;GO:0005730;GO:0030687
CGI_10006409	-0.317058	0.000565453	206.954	-0.233902	0.0113067	208.651	-0.31365	0.000631878	210.944	-0.288203	suppressor APC domain-containing 2 isoform X2	0.5765		unknown
CGI_10002861	-0.241967	0.00933042	339.497	-0.185538	0.0469286	345.919	-0.437886	7.05946e-07	374.156	-0.288464	Ankyrin repeat and SOCS box 2	0.758		GO:0016021
CGI_10020625	-0.245172	0.035565	360.746	-0.23647	0.0140108	373.797	-0.402239	0.000198759	391.093	-0.294627	chymotrypsinogen A-like	0.5155		GO:0006508;GO:0004252
CGI_10001338	-0.248753	0.0105628	243.86	-0.240134	0.0195546	253.009	-0.400111	1.33497e-05	264.042	-0.296333	PREDICTED: uncharacterized protein LOC105340916 [Crassostrea gigas]	0.635		unknown
CGI_10021666	-0.37045	1.45244e-06	420.112	-0.352211	0.000192336	434.031	-0.175425	0.0442012	397.827	-0.299362	hypothetical protein CGI_10021666	0.6485		unknown
CGI_10003223	-0.341034	6.7548e-05	379.428	-0.320036	0.000438571	392.023	-0.237082	0.00464427	372.255	-0.299384	leucine-rich repeat-containing 74B-like [Crassostrea gigas]	0.5605		GO:0008063
CGI_10002863	-0.22799	0.00720134	351.39	-0.37398	0.000117323	386.912	-0.303139	0.000681398	368.719	-0.301703	probable Xaa-Pro aminopeptidase 3	0.6115		GO:0006508;GO:0004177;GO:0030145
CGI_10021665	-0.269688	0.00171874	445.144	-0.342845	1.44178e-06	476.244	-0.296057	0.000316611	458.522	-0.302863	SPRY domain-containing SOCS box 3-like [Octopus bimaculoides]	0.7135		GO:0005515;GO:0005622;GO:0035556
CGI_10005449	-0.409943	7.86811e-07	270.438	-0.282834	0.00159088	267.99	-0.216929	0.0357073	256.075	-0.303235	golgin subfamily B member 1-like	0.75		unknown
CGI_10010532	-0.338327	0.00052725	535.222	-0.288552	0.0244006	546.852	-0.283546	0.0356264	535.211	-0.303475	alanine--glyoxylate aminotransferase 2-like	0.766		GO:0030170;GO:0042802;GO:0008152;GO:0008453
CGI_10018997	-0.271123	0.000821551	1110.34	-0.344672	2.88625e-10	1187.92	-0.296901	5.88161e-05	1143.74	-0.304232	Low-density lipo receptor-related 4	0.602		GO:0016021
CGI_10008972	-0.325593	0.00537868	2270.08	-0.291025	0.0113911	2330.77	-0.30293	0.00768264	2296.09	-0.306516	1,25-dihydroxyvitamin D(3) 24- mitochondrial-like	0.6195		GO:0005506;GO:0016705;GO:0055114;GO:0004497;GO:0020037
CGI_10021562	-0.414946	2.57444e-09	2720.42	-0.279253	2.13769e-06	2683.45	-0.225656	0.00105811	2578.77	-0.306618	TBC1 domain family member 1 isoform X2	0.7195		GO:0006508;GO:0008237
CGI_10008472	-0.386293	3.0857e-05	1134.41	-0.323859	0.000236807	1151.57	-0.212732	0.0201565	1082.29	-0.307628	cytospin-A-like isoform X2 [Lingula anatina]	0.6595		unknown
CGI_10005298	-0.278001	0.000466166	275.707	-0.355635	3.42186e-05	295.836	-0.295592	0.000410433	283.048	-0.309743	hypothetical protein CGI_10005298	0.844		GO:0016021
CGI_10004096	-0.385212	3.23648e-07	697.275	-0.208613	0.0298285	678.23	-0.338146	6.09318e-06	698.384	-0.310657	endothelin-converting enzyme 2-like isoform X3 [Crassostrea gigas]	0.729		GO:0006508;GO:0016021;GO:0004222
CGI_10003250	-0.25895	0.000782983	1101.89	-0.291306	0.000125764	1160.79	-0.38345	2.8149e-06	1179.73	-0.311235	F-box only 25 isoform X2	0.5435		unknown
CGI_10006791	-0.346934	0.00015099	5280.26	-0.285635	0.00163828	5365.32	-0.303374	0.00066613	5297.78	-0.311981	tax1-binding 1-like isoform X1 [Octopus bimaculoides]	0.577		unknown
CGI_10012016	-0.186034	0.0478593	2542.21	-0.323542	0.00351033	2789.44	-0.436765	4.99582e-06	2860.08	-0.315447	excitatory amino acid transporter 2 isoform X3 [Fukomys damarensis]	0.738		GO:0006835;GO:0055085;GO:0017153;GO:0016021;GO:0008345
CGI_10027135	-0.277731	4.7416e-07	1495.51	-0.375701	1.2202e-10	1616.66	-0.294321	1.15875e-05	1536.17	-0.315918	Sugar phosphate exchanger 2	0.7665		GO:0055085;GO:0016021
CGI_10021792	-0.342183	0.000231174	241.733	-0.346948	0.000277144	251.649	-0.261069	0.0254006	238.899	-0.316733	Basement membrane proteoglycan	0.5385		GO:0016021
CGI_10002631	-0.246807	0.0284573	232.315	-0.446177	0.000762086	261.948	-0.261409	0.0172698	238.342	-0.318131	hypothetical protein CGI_10002631	1		unknown
CGI_10016815	-0.318187	0.00227291	165.727	-0.386914	0.00419484	177.584	-0.260225	0.0137854	165.497	-0.321775	ATP-dependent (S)-NAD(P)H-hydrate dehydratase isoform X2	0.7415		unknown
CGI_10002617	-0.289451	0.00368468	1316.05	-0.260004	0.0167925	1354.4	-0.425642	2.10889e-05	1417.03	-0.325032	sulfide:quinone mitochondrial isoform X1 [Gallus gallus]	0.754		GO:0055114;GO:0070224;GO:0005743
CGI_10018227	-0.321682	0.00450631	360.579	-0.307783	0.00750532	373.268	-0.353794	0.000174419	372.305	-0.327753	PDZ and LIM domain Zasp	0.6485		unknown
CGI_10016014	-0.369355	1.47224e-05	1192.25	-0.291916	0.0029223	1204.03	-0.323396	0.000633699	1194.89	-0.328222	Voltage-gated hydrogen channel 1	0.9875		GO:0016021
CGI_10015510	-0.239777	0.0283069	371.549	-0.304797	0.0013117	396.306	-0.464629	0.000220514	414.344	-0.336401	F-box WD repeat-containing 7	0.803		GO:0006388;GO:0016772
CGI_10012486	-0.279946	0.00199313	296.951	-0.43105	1.27779e-07	327.752	-0.302628	0.000573985	305.534	-0.337875	cyclic nucleotide-binding domain-containing 2-like	0.6315		unknown
CGI_10007570	-0.302644	3.07431e-06	3574.51	-0.358627	3.85338e-06	3802.69	-0.353088	7.16583e-07	3720.11	-0.33812	Tubulin alpha-1 chain	0.992		GO:0042626;GO:0055085;GO:0036064;GO:0008152;GO:0005200;GO:0005874;GO:0007017;GO:0005525;GO:0005634;GO:0005524;GO:0005737;GO:0003924;GO:0016021
CGI_10021866	-0.30879	0.0231009	848.617	-0.243196	0.0495497	860.355	-0.466717	1.2613e-05	921.299	-0.339568	retinal dehydrogenase 1-like	0.814		GO:0004029;GO:0055114
CGI_10004887	-0.432668	0.000286429	159.676	-0.347168	0.00183719	160.323	-0.249134	0.0340431	151.571	-0.34299	Ras-related and estrogen-regulated growth inhibitor	0.6335		GO:0005525;GO:0007264;GO:0016020;GO:0015031;GO:0005622
CGI_10023247	-0.392765	5.99874e-12	1966.77	-0.420639	3.66178e-13	2069.56	-0.216218	4.17909e-05	1874.96	-0.343207	P2X purinoceptor 4	0.693		GO:0004931;GO:0005887;GO:0065008;GO:0035590;GO:0033198;GO:0043231;GO:0001614;GO:0098655;GO:0031090;GO:0044446
CGI_10017895	-0.365002	0.0027061	600.355	-0.309578	0.000124195	610.322	-0.358813	4.13958e-05	610.069	-0.344465	hypothetical protein CGI_10017895	0.7345		unknown
CGI_10020985	-0.280777	0.00634195	158.055	-0.347325	0.000277572	168.791	-0.407133	0.000217643	169.606	-0.345078	BTB POZ domain-containing KCTD6 [Pseudopodoces humilis]	0.779		GO:0003676;GO:0030506;GO:0046872;GO:0051260
CGI_10017042	-0.33489	8.89391e-07	3763.22	-0.23427	8.63664e-05	3767.74	-0.470805	7.18947e-10	4053.81	-0.346655	hexokinase-2-like isoform X5 [Aplysia californica]	0.8855		GO:0005536;GO:0005623;GO:0005524;GO:0001678;GO:0006096;GO:0004396;GO:0046835
CGI_10012219	-0.302662	2.67093e-05	854.842	-0.385956	9.53954e-09	918.516	-0.353684	2.461e-06	889.499	-0.347434	sorting nexin lst-4-like isoform X1	0.824		GO:0005547;GO:0005768;GO:0090389;GO:0045335;GO:0007067;GO:0019898;GO:0006886
CGI_10014709	-0.352604	1.25244e-05	280.711	-0.225302	0.0325495	278.326	-0.464467	1.70185e-10	299.263	-0.347458	pyrazinamidase nicotinamidase	0.699		GO:0003824;GO:0005509;GO:0008152
CGI_10017333	-0.245534	0.0214437	673.081	-0.480361	1.82932e-07	768.045	-0.319303	0.00277493	706.304	-0.348399	deoxyribose-phosphate aldolase-like	0.841		GO:0004139;GO:0005737;GO:0009264;GO:0016052
CGI_10026964	-0.331224	0.018101	138.743	-0.312327	0.030494	143.363	-0.404416	0.00599705	145.886	-0.349323	ECT2 isoform X1	0.683		GO:0005634;GO:0035023;GO:0005737;GO:0000902;GO:0005096;GO:0000910;GO:0045666;GO:0005089;GO:0035556;GO:0043547
CGI_10017229	-0.350225	0.0058974	666.154	-0.284106	0.0314529	675.7	-0.417004	0.00152165	698.525	-0.350445	ITFG3-like isoform X1 [Biomphalaria glabrata]	0.595		GO:0016021
CGI_10000696	-0.271598	0.000884353	852.269	-0.437716	4.78049e-05	947.453	-0.343789	1.53408e-05	894.343	-0.351034	endothelin-converting enzyme 2-like	0.5155		GO:0006508;GO:0016021;GO:0004222
CGI_10005411	-0.482044	2.64017e-07	1267.86	-0.270593	0.00983032	1212.97	-0.305089	0.00023113	1204.82	-0.352575	PREDICTED: uncharacterized protein LOC105348829 [Crassostrea gigas]	1		GO:0016021
CGI_10011650	-0.332684	0.0088504	214.435	-0.298873	0.00207179	220.174	-0.442019	4.04959e-06	228.551	-0.357859	Phosphatidylinositol-binding clathrin assembly	0.557		unknown
CGI_10001748	-0.302672	0.00270394	1729.03	-0.3728	4.39788e-06	1848.02	-0.402505	9.27063e-06	1834.19	-0.359325	hypothetical protein CGI_10001748	0.8243		unknown
CGI_10003785	-0.313649	2.75011e-05	3892.14	-0.185725	0.0259335	3858.38	-0.582688	1.50252e-13	4426.74	-0.360687	hypothetical protein CGI_10003785	0.8689		unknown
CGI_10026600	-0.26459	0.0159784	3257.03	-0.581114	4.73015e-06	3854.89	-0.251976	0.0229682	3307.23	-0.365893	chitinase 1 precursor [Crassostrea gigas]	0.668		GO:0004568;GO:0005975;GO:0006032
CGI_10014705	-0.352087	0.0258344	73.1038	-0.315686	0.0373036	74.8615	-0.431598	0.00391976	76.8257	-0.366457	hypothetical protein CGI_10014705	0.552		GO:0016021
CGI_10027479	-0.415856	3.94524e-05	159.439	-0.255799	0.0205629	155.585	-0.431487	4.25313e-05	163.612	-0.367714	apoptosis regulatory Siva	0.48		GO:0065007;GO:0044763;GO:0005488
CGI_10026257	-0.402266	2.7176e-07	302.065	-0.36234	1.16809e-05	309.225	-0.3418	0.000325193	300.831	-0.368802	ubiquitin ATG12	0.769		GO:0000045;GO:0005737
CGI_10013627	-0.306629	0.00448475	154.95	-0.454097	3.34482e-06	170.707	-0.348871	0.000795875	160.73	-0.369866	PREDICTED: uncharacterized protein LOC105325888 [Crassostrea gigas]	0.6175		unknown
CGI_10013926	-0.354959	0.000383389	157.133	-0.366314	0.000237392	164.463	-0.393785	0.00175247	163.259	-0.371686	neurensin-1-like [Octopus bimaculoides]	0.6035		GO:0016021;GO:0030133
CGI_10026671	-0.516231	9.84317e-16	3440.06	-0.224958	0.00221852	3192.77	-0.375546	6.16118e-11	3316.76	-0.372245	sulfite oxidase-like	0.8525		GO:0016491;GO:0034220;GO:0030151;GO:0016021;GO:0005230;GO:0055114;GO:0020037;GO:0043546;GO:0042128
CGI_10023026	-0.307246	0.000424789	711.378	-0.343988	0.00503882	751.474	-0.469521	1.278e-06	774.27	-0.373585	carnitine O-palmitoyltransferase liver isoform-like isoform X1 [Biomphalaria glabrata]	0.786		GO:0016746;GO:0008152;GO:0016021
CGI_10028556	-0.244093	0.021534	1769.86	-0.461778	1.12331e-06	2005.71	-0.425116	9.08491e-06	1937.96	-0.376995	proton myo-inositol cotransporter-like	0.709		GO:0005887;GO:0015992;GO:0005351;GO:0046323;GO:0005355;GO:1904659
CGI_10011135	-0.330228	0.0424879	90.4518	-0.331406	0.0177589	93.9275	-0.469556	0.000137708	97.4974	-0.377064	Cyclin-dependent kinase inhibitor 3	0.7165		GO:0004722;GO:0007050;GO:0005634;GO:0005737;GO:0004725;GO:0000082;GO:0016310;GO:0016301;GO:0035335;GO:0008138
CGI_10006957	-0.289112	0.0446859	251.764	-0.415324	6.81778e-05	274.906	-0.439183	8.08872e-06	272.141	-0.381206	Solute carrier family 23 member 2	0.6575		GO:0055085;GO:0016021;GO:0005215
CGI_10016399	-0.297753	0.00745463	225.272	-0.57845	5.31177e-06	262.956	-0.268022	0.0213072	227.444	-0.381408	nicotinate phosphoribosyltransferase isoform X2	0.8395		GO:0004514;GO:0004516;GO:0009435;GO:0019358;GO:0016874
CGI_10024281	-0.455637	7.4542e-06	236.044	-0.331439	0.00152204	233.734	-0.358551	0.000178031	231.395	-0.381875	Organic cation transporter	0.648		GO:0055085;GO:0022857;GO:0016021
CGI_10027171	-0.34536	0.000483982	301.619	-0.377757	3.23817e-05	317.69	-0.434852	9.36339e-05	318.591	-0.38599	cytosolic purine 5 -nucleotidase isoform X2	0.809		GO:0046872;GO:0008152;GO:0016787
CGI_10011110	-0.363535	0.00476046	295.728	-0.42892	0.0024777	316.204	-0.371059	0.0330627	303.232	-0.387838	Peptidyl-prolyl cis-trans isomerase FKBP1B	0.643		GO:0035584;GO:0010880;GO:0032092;GO:0009792;GO:1902991;GO:0007179;GO:0042110;GO:0043123;GO:0000413;GO:0043206;GO:0032925;GO:0032526;GO:0034704;GO:0070062;GO:0048185;GO:0003206;GO:0005528;GO:0031398;GO:0070588;GO:0005829;GO:0031012;GO:0086064;GO:0033017;GO:0030324;GO:0050776;GO:0007183;GO:0022417;GO:0005160;GO:0032880;GO:0060173;GO:0051480;GO:0007420;GO:0035050;GO:0042026;GO:0044325;GO:0006458;GO:…
CGI_10011883	-0.350191	0.000223649	210.183	-0.321477	0.00084651	216.473	-0.49715	2.37024e-06	227.692	-0.389606	iroquois-class homeodomain IRX-6-like [Aplysia californica]	0.6885		GO:0005634;GO:0006355;GO:0043565
CGI_10012490	-0.232915	6.06773e-06	3058.88	-0.194287	0.00118367	3137.46	-0.752883	4.07985e-34	3857.47	-0.393362	Sodium- and chloride-dependent glycine transporter 2	0.699		GO:0006836;GO:0005328;GO:0055085;GO:0016021
CGI_10003259	-0.380058	0.00122934	117.122	-0.429077	0.0141505	124.417	-0.375569	0.0229786	119.335	-0.394901	transient receptor potential cation channel subfamily V member 5-like	0.5375		GO:0016021
CGI_10011787	-0.368668	0.00213246	200.97	-0.383299	0.006515	210.577	-0.432889	0.000780696	210.671	-0.394952	beta-microsemino -like	0.5617		unknown
CGI_10027893	-0.636426	4.74505e-08	648.798	-0.251542	0.0458435	577.018	-0.303251	0.00968575	577.19	-0.397073	sodium glucose cotransporter 4	0.7695		GO:0005887;GO:0006814;GO:0005412;GO:1904659
CGI_10021028	-0.647902	1.63536e-11	1266.93	-0.280179	0.000362245	1134.27	-0.280153	2.51031e-05	1112.24	-0.402745	aminopeptidase N-like	0.609		GO:0008270;GO:0006508;GO:0004177;GO:0008237
CGI_10003156	-0.374765	3.76021e-07	783.13	-0.449264	3.5461e-09	839.629	-0.386754	2.3647e-08	802.885	-0.403594	Acyl- synthetase short-chain family member mitochondrial	0.7905		GO:0003824;GO:0008152
CGI_10020581	-0.297146	0.000525408	582.132	-0.512978	3.68174e-12	659.895	-0.410046	1.43848e-08	620.822	-0.406723	potassium channel subfamily T member 2-like isoform X1 [Crassostrea gigas]	0.752		GO:0015269;GO:0071805;GO:0016021
CGI_10004448	-0.461554	0.00282231	337.672	-0.257124	0.0315179	323.311	-0.502995	0.00170468	350.913	-0.407224	hypothetical protein CGI_10004448	0.99		GO:0016021
CGI_10020954	-0.363831	0.000132431	315.022	-0.609367	9.30727e-15	362.229	-0.251176	0.0142401	307.869	-0.408125	dual 3 ,5 -cyclic-AMP and -GMP phosphodiesterase 11A	0.7215		GO:0046872;GO:0007165;GO:0009154;GO:0044464;GO:0009214;GO:0030551;GO:0043168;GO:0032555;GO:0004114
CGI_10007411	-0.331228	0.00999124	286.819	-0.532678	3.95987e-05	324.064	-0.361043	0.00717658	296.221	-0.408316	hypothetical protein CGI_10007411	0.995		unknown
CGI_10026730	-0.331323	0.0120352	138.881	-0.39728	0.00917747	148.562	-0.505054	7.70564e-07	151.901	-0.411219	midasin-like isoform X1 [Crassostrea gigas]	0.725		unknown
CGI_10008340	-0.297426	0.0196403	370.3	-0.423409	1.05763e-06	404.424	-0.513367	2.95779e-06	411.712	-0.4114	hypothetical protein CGI_10008340	0.6107		unknown
CGI_10016998	-0.361943	0.0118209	264.079	-0.528599	8.32039e-05	293.971	-0.344976	0.0305862	267.533	-0.411839	serine threonine- kinase 26- partial	0.72		GO:0005524;GO:0007229;GO:0006508;GO:0004672;GO:0006468;GO:0004222
CGI_10008962	-0.466988	9.74585e-07	344.104	-0.433596	3.5639e-07	353.017	-0.33588	0.003856	333.203	-0.412155	cytosolic phospholipase A2-like isoform X5 [Crassostrea gigas]	0.775		GO:0004623;GO:0046872;GO:0009395;GO:0044444
CGI_10009135	-0.266278	6.10019e-05	1137.17	-0.404917	2.08661e-09	1248.75	-0.57431	5.10148e-28	1311.41	-0.415168	Extended synaptotagmin-2	0.715		GO:0016021;GO:0008289
CGI_10016099	-0.36317	0.020853	59.2729	-0.504641	0.000492575	65.4272	-0.382316	0.0139897	60.9803	-0.416709	-tyrosine sulfotransferase 2-like [Crassostrea gigas]	0.8365		GO:0016021;GO:0008476;GO:0006478
CGI_10000050	-0.390972	0.00145422	226.886	-0.348061	0.00169073	231.672	-0.524344	4.33089e-08	243.908	-0.421126	succinate dehydrogenase [ubiquinone] iron-sulfur mitochondrial	0.8805		GO:0008177;GO:0046872;GO:0009055;GO:0051538;GO:0006099;GO:0051539;GO:0051537;GO:0005743
CGI_10006692	-0.282373	0.00115402	261.319	-0.545183	2.77557e-14	301.952	-0.441114	1.82195e-09	283.933	-0.42289	dihydrofolate reductase	0.718		GO:0050661;GO:0009165;GO:0055114;GO:0004146;GO:0006545
CGI_10002097	-0.303338	0.000653369	215.021	-0.677556	2.07922e-18	260.853	-0.288491	0.000681398	218.217	-0.423128	major vault -like	0.887		GO:0016021
CGI_10003307	-0.518634	4.78731e-05	152.319	-0.419907	0.000142431	152.044	-0.331678	0.0181056	144.278	-0.423406	neuronal acetylcholine receptor subunit alpha-10-like [Crassostrea gigas]	0.728		GO:0004889;GO:0045211;GO:0098655;GO:0016021;GO:0030054
CGI_10018465	-0.628087	5.07452e-18	318.468	-0.360709	0.000221419	297.024	-0.281559	0.000756879	282.363	-0.423452	endoplasmic reticulum aminopeptidase 1 isoform X3 [Tribolium castaneum]	0.6455		GO:0008270;GO:0006508;GO:0016021;GO:0004177;GO:0008237
CGI_10017815	-0.387921	0.000202853	351.672	-0.581405	8.7117e-09	396.21	-0.303345	0.00936461	347.245	-0.424224	peroxisomal carnitine O-octanoyltransferase [Equus asinus]	0.6475		GO:0016746;GO:0044238;GO:0032787
CGI_10028008	-0.272415	0.0150065	332.365	-0.458332	1.34227e-05	372.499	-0.555816	1.87812e-05	380.884	-0.428854	GLIPR1 1	0.691		GO:0005509;GO:0016021;GO:0007156;GO:0005576
CGI_10027895	-0.483031	2.61296e-05	109.16	-0.305161	0.0229598	105.628	-0.508985	0.000172592	112.748	-0.432392	transmembrane 53-like [Cynoglossus semilaevis]	0.5765		unknown
CGI_10024229	-0.501331	1.08736e-05	2676.64	-0.390859	0.00956872	2666.58	-0.407013	0.00876697	2632.52	-0.433068	proline-rich extensin EPR1	0.7375		unknown
CGI_10013368	-0.414763	1.61898e-07	862.115	-0.346579	2.22098e-07	873.153	-0.541221	6.20438e-16	925.742	-0.434188	glucose-induced degradation 8 homolog	0.856		GO:0016021
CGI_10027619	-0.43999	7.18979e-08	348.085	-0.422179	2.31417e-06	359.819	-0.441569	1.32747e-07	355.361	-0.434579	thymidine phosphorylase [Lepisosteus oculatus]	0.708		GO:0004645;GO:0006206;GO:0009032;GO:0005829;GO:0016154;GO:0006220;GO:0006213
CGI_10008702	-0.605961	8.77299e-06	203.843	-0.380387	0.0101833	193.24	-0.320207	0.00888313	184.66	-0.435518	hypothetical protein CGI_10008702	0.69		GO:0016021
CGI_10022295	-0.336726	0.014664	113.348	-0.551475	5.95216e-07	128.538	-0.426863	0.0130108	120.017	-0.438355	orexin receptor type 2-like isoform X1 [Octopus bimaculoides]	0.5935		GO:0004930;GO:0007186;GO:0016021
CGI_10021669	-0.408162	0.025712	68.1658	-0.439762	0.00232183	71.7232	-0.475389	0.0013429	71.5171	-0.441104	hypothetical protein CGI_10021669	0.8255		GO:0016021
CGI_10025815	-0.521982	0.000108239	155.043	-0.338043	0.0174883	149.655	-0.465566	0.00547265	154.739	-0.441864	thiopurine S-methyltransferase isoform X2	0.53		GO:0008757;GO:0032259
CGI_10006637	-0.394309	0.000334534	279.273	-0.594469	1.66351e-11	315.115	-0.33854	0.00916117	278.563	-0.442439	cell division control 42 homolog	0.6875		GO:0005525;GO:0051301;GO:0048731;GO:0007264;GO:0016020;GO:0015031;GO:0051649;GO:0005622
CGI_10006559	-0.345519	0.0185758	471.179	-0.534442	9.55081e-08	528.393	-0.44875	4.4641e-07	499.895	-0.442904	uncharacterized oxidoreductase -like	0.7535		GO:0016491;GO:0055114
CGI_10021010	-0.503726	2.48633e-07	482.205	-0.325488	0.00443874	467.343	-0.503733	5.05122e-05	493.005	-0.444315	hypothetical protein CGI_10021010	0.62		unknown
CGI_10024803	-0.556488	2.08037e-07	484.23	-0.318663	0.0038346	457.59	-0.46329	1.14223e-05	475.153	-0.446147	nitrile-specifier 5-like	0.6245		unknown
CGI_10021731	-0.383393	1.52714e-08	386.201	-0.311654	1.9973e-06	390.68	-0.644543	3.00061e-13	438.725	-0.44653	exostosin-2 isoform X1	0.754		GO:0042328;GO:0015014;GO:0042803;GO:0050508;GO:0050509;GO:0043541;GO:0006024;GO:0000139;GO:0070062;GO:0046982;GO:0001503;GO:0016021;GO:0030154;GO:0001707
CGI_10027819	-0.376466	0.0489289	47.4036	-0.436407	0.0314515	50.4806	-0.528821	0.0020394	51.4608	-0.447231	beta-1,3-galactosyltransferase 1-like	0.7035		GO:0016021;GO:0006486;GO:0008378;GO:0005794
CGI_10014644	-0.402512	3.59204e-05	261.503	-0.494758	3.20298e-07	282.588	-0.446214	9.25048e-06	271.578	-0.447828	mitogen-activated kinase kinase kinase 1 [Alligator mississippiensis]	0.684		GO:0005524;GO:0008270;GO:0004672;GO:0006468
CGI_10019827	-0.221812	0.00314755	7543.07	-0.506535	1.45041e-08	8782.62	-0.61616	8.47164e-21	9006.62	-0.448169	alpha-N-acetylgalactosaminidase-like isoform X2	0.76		GO:0004557;GO:0016139;GO:0005975;GO:0005737
CGI_10010728	-0.414891	0.00496374	221.667	-0.281052	0.0383668	218.391	-0.651271	1.23587e-08	249.108	-0.449072	tubulin polyglutamylase TTLL4-like [Sinocyclocheilus anshuiensis]	0.7835		GO:0018095
CGI_10021266	-0.299293	0.0195296	175.883	-0.518524	2.55736e-06	199.81	-0.535955	9.35622e-07	197.369	-0.451257	Endo-1,3(4)-beta-glucanase 1	0.634		unknown
CGI_10001505	-0.337452	0.00042656	271.353	-0.605856	1.92762e-08	314.908	-0.410849	0.000101674	284.914	-0.451385	heme-binding 2-like	0.634		GO:0016757;GO:0016021;GO:0006486;GO:0000139;GO:0030246
CGI_10021044	-0.444385	3.14389e-09	485.44	-0.651696	1.74694e-10	551.26	-0.259506	0.00320623	460.662	-0.451862	Alpha-mannosidase 2C1	0.7405		GO:0006517;GO:0004559;GO:0008270;GO:0015926;GO:0006013;GO:0030246;GO:0005773
CGI_10008905	-0.317375	0.0137429	537.403	-0.393116	0.000728221	576.067	-0.646433	8.32125e-13	626.897	-0.452308	hypothetical protein CGI_10008905	0.822		GO:0016021
CGI_10004834	-0.478562	0.00189503	1409.35	-0.536093	2.66073e-05	1499.08	-0.353291	0.0305501	1365.84	-0.455982	GL19950 [Drosophila persimilis]	0.4885		GO:0009790;GO:0040011;GO:0030097;GO:0007476;GO:0032989;GO:0048522;GO:0045596;GO:0043231;GO:0005509;GO:0030707;GO:0048542;GO:0051241;GO:0001709;GO:0050896;GO:0060255;GO:0042386;GO:0048646;GO:0044444;GO:0048666;GO:0007447;GO:0001751;GO:0051674;GO:0006928;GO:0016021;GO:0080090;GO:0031323;GO:2000026
CGI_10007975	-0.792056	1.28583e-11	261.508	-0.353367	0.00124684	225.791	-0.230019	0.043728	210.946	-0.458481	39S ribosomal mitochondrial	0.6745		GO:0019233;GO:0005840
CGI_10022548	-0.316429	1.05561e-05	476.877	-0.49794	1.84816e-11	533.75	-0.561885	6.92518e-12	537.424	-0.458752	solute carrier family 23 member 2	0.668		GO:0055085;GO:0016021;GO:0005215
CGI_10013624	-0.8044	1.19078e-12	354.123	-0.242724	0.0434114	291.739	-0.332382	0.0182772	296.187	-0.459835	hypothetical protein CGI_10013624	1		GO:0016021
CGI_10002335	-0.364129	0.00603135	233.844	-0.45455	6.13209e-06	251.791	-0.563969	1.18033e-08	258.525	-0.460883	B-cell receptor-associated 31	0.736		GO:0048584;GO:0051247;GO:0048522;GO:0016021;GO:0005783;GO:0006886;GO:0044446;GO:0006874
CGI_10022694	-0.392322	9.13104e-08	474.988	-0.654976	2.18187e-15	550.989	-0.339806	1.92937e-06	474.389	-0.462368	multiple C2 and transmembrane domain-containing 1-like	0.7465		GO:0016021
CGI_10015495	-0.427497	0.000232523	349.881	-0.589228	2.87464e-12	388.746	-0.37084	1.10909e-05	348.583	-0.462521	low-density lipo receptor-related 4-like	0.5525		GO:0016021
CGI_10013699	-0.350859	0.00262977	258.413	-0.611338	4.73206e-09	298.828	-0.428561	0.000265377	271.604	-0.463586	Alpha-parvin	0.8365		GO:0003779;GO:0007155;GO:0009653;GO:0044424;GO:0031532;GO:0044767
CGI_10027152	-0.562919	3.57556e-14	659.273	-0.447484	1.46196e-14	654.377	-0.389319	2.00343e-06	626.871	-0.466574	Cell adhesion molecule 3	0.8575		GO:0008270;GO:0022857;GO:0016021;GO:0006810
CGI_10016050	-0.372505	0.0010519	128.687	-0.46738	2.46079e-05	138.937	-0.565496	4.51649e-05	142.071	-0.46846	Multiple epidermal growth factor-like domains 10	0.6015		GO:0016021
CGI_10017380	-0.287137	0.0187728	159.607	-0.640201	2.70971e-08	192.001	-0.481502	0.000106905	176.166	-0.469613	hypothetical protein CGI_10017380	1		unknown
CGI_10002671	-0.427407	0.00534191	284.507	-0.65819	3.35457e-07	325.97	-0.336902	0.0230002	279.884	-0.474167	regucalcin-like [Crassostrea gigas]	0.7095		GO:0005509;GO:0050790;GO:0030234
CGI_10002917	-0.481872	2.06229e-20	2733.53	-0.263534	4.11745e-06	2610.88	-0.678213	6.3349e-24	3028.95	-0.47454	serrate RNA effector molecule homolog	0.6715		unknown
CGI_10021043	-0.347318	0.00109447	250.04	-0.532668	1.0122e-06	280.449	-0.544165	5.67554e-05	276.483	-0.474717	PREDICTED: uncharacterized protein LOC105330962 [Crassostrea gigas]	0.52		unknown
CGI_10002252	-0.372137	5.76344e-06	439.781	-0.524475	2.93608e-12	486.332	-0.528483	3.44655e-10	477.75	-0.475032	28 kDa heat- and acid-stable phospho -like	0.818		unknown
CGI_10016883	-0.4571	5.60362e-05	284.619	-0.619527	1.31213e-11	316.552	-0.352997	0.0026417	278.394	-0.476541	Hikeshi-like [Crassostrea gigas]	0.7805		GO:0015031;GO:0044424;GO:0043227
CGI_10024826	-0.495684	1.83597e-05	624.105	-0.434964	0.000234474	633.492	-0.506833	3.3925e-05	639.917	-0.479161	opine dehydrogenase-like [Crassostrea gigas]	0.8225		GO:0050662;GO:0055114;GO:0050305;GO:0008677;GO:0047636
CGI_10008970	-0.558158	1.85309e-07	234.266	-0.463306	4.08508e-05	234.238	-0.423551	0.000122606	226.158	-0.481672	dual specificity phosphatase 22-like isoform X2	0.765		GO:0004721;GO:0016311
CGI_10006695	-0.370428	0.024517	211.433	-0.548023	0.00119503	236.752	-0.531023	0.00674375	230.967	-0.483158	prostaglandin E2 receptor EP4 subtype	0.5105		GO:0004930;GO:0007186;GO:0016021
CGI_10020078	-0.363102	0.017121	71.5295	-0.398064	0.00689507	75.4417	-0.690739	1.2425e-06	83.8696	-0.483968	retinol dehydrogenase 11-like [Crassostrea gigas]	0.713		GO:0016491;GO:0055114
CGI_10024684	-0.481433	9.46755e-08	349.857	-0.541881	4.17944e-07	373.321	-0.435859	3.69435e-06	350.509	-0.486391	hypothetical protein CGI_10024684	1		unknown
CGI_10024745	-0.681712	2.36246e-13	301.02	-0.451019	5.22521e-08	284.239	-0.331777	0.000781405	265.923	-0.48817	death domain-containing 1-like	0.73		GO:0007165
CGI_10010640	-0.589622	1.30794e-08	278.066	-0.615304	3.04628e-08	292.544	-0.261768	0.0245396	248.606	-0.488898	rap guanine nucleotide exchange factor 4 isoform X1	0.746		GO:0030073;GO:0007264;GO:0005085;GO:0030552;GO:0017157;GO:0005622;GO:0019933;GO:0043547
CGI_10021074	-0.58283	0.00102642	130.78	-0.44215	0.0159643	127.84	-0.447876	0.0240288	125.816	-0.490952	cholecystokinin receptor-like [Crassostrea gigas]	0.547		GO:0004930;GO:0007186;GO:0016021
CGI_10022806	-0.534761	7.44494e-05	320.195	-0.349121	0.0222412	308.749	-0.589215	0.000806552	335.127	-0.491032	hypothetical protein CGI_10022806	0.675		GO:0016021
CGI_10016948	-0.307509	0.000128481	10915.9	-0.521155	9.49609e-08	12378.8	-0.653055	1.87688e-12	12830.4	-0.493906	fibrocystin-L [Haplochromis burtoni]	0.6645		GO:0016021
CGI_10004449	-0.394023	0.0444288	449.77	-0.571929	0.000360201	503.276	-0.528057	0.000433385	484.068	-0.498003	hypothetical protein CGI_10004449	1		unknown
CGI_10024350	-0.515474	3.38474e-07	255.145	-0.323414	0.00236226	245.862	-0.658265	1.7048e-13	275.997	-0.499051	hypothetical protein CGI_10024350	0.815		GO:0016021
CGI_10028667	-0.542955	1.03778e-06	304.577	-0.513354	5.34593e-06	313.142	-0.446495	0.000119183	298.766	-0.500935	myb Q [Polistes dominula]	0.6		GO:0016021
CGI_10020435	-0.451729	0.0314054	49.3149	-0.454285	0.0308799	51.2706	-0.602721	0.00437582	53.7741	-0.502912	CKLF-like MARVEL transmembrane domain-containing 4	0.896		GO:0016021
CGI_10000263	-0.674813	3.47036e-09	261.629	-0.543703	7.74976e-06	257.51	-0.29342	0.029949	228.22	-0.503979	CDV3 homolog isoform X2	0.84		unknown
CGI_10022368	-0.627571	0.00152804	61.5876	-0.491393	0.0226777	60.2706	-0.407089	0.0281192	57.0186	-0.508685	Scavenger receptor class F member 2	0.83		GO:0016310;GO:0016301
CGI_10007497	-0.465515	4.77265e-05	261.312	-0.461266	4.95582e-06	271.376	-0.599385	1.13887e-09	281.664	-0.508722	sodium-coupled monocarboxylate transporter 1-like	0.662		GO:0055085;GO:0015718;GO:0016021;GO:0051181;GO:0051180;GO:0005215;GO:0042886
CGI_10007588	-0.475323	0.00109599	138.3	-0.70367	4.63073e-06	159.024	-0.349478	0.00951015	134.199	-0.50949	acetylcholine receptor subunit beta-like	0.6425		GO:0034220;GO:0016021;GO:0005230;GO:0005488
CGI_10027775	-0.40578	5.35273e-07	944.843	-0.734949	6.8138e-17	1128.89	-0.389953	0.000115918	958.315	-0.510227	persulfide dioxygenase mitochondrial-like isoform X2	0.8285		GO:0004416;GO:0008152
CGI_10028413	-0.641367	1.02003e-05	516.436	-0.3932	0.000723275	483.397	-0.503697	8.61637e-07	495.469	-0.512755	Aminopeptidase N	0.6665		GO:0008270;GO:0006508;GO:0016021;GO:0004177;GO:0008237
CGI_10026392	-0.681587	2.21844e-06	207.703	-0.485389	0.000744139	198.548	-0.379746	0.0295033	186.766	-0.515574	serine threonine- kinase roco5	0.7489		GO:0000166;GO:0005634;GO:0003677;GO:0008270;GO:0006351;GO:0016020;GO:0006355;GO:0046983
CGI_10011222	-0.363623	0.0307433	188.583	-0.602744	1.56576e-05	216.373	-0.581135	2.2636e-05	210.113	-0.515834	Mitochondrial 2-oxodicarboxylate carrier	0.8245		GO:0055085;GO:0003735;GO:0016491;GO:0016021;GO:0008168;GO:0055114;GO:0006412;GO:0032259
CGI_10024791	-0.530716	1.54287e-06	133.745	-0.623809	9.52924e-11	144.743	-0.393517	0.000547306	129.07	-0.516014	galactosylgalactosylxylosyl 3-beta-glucuronosyltransferase 3 [Latimeria chalumnae]	0.773		GO:0005975;GO:0050650;GO:0016020;GO:0015018;GO:0030204
CGI_10024579	-0.59125	6.81042e-22	7236.67	-0.606667	5.37034e-20	7579.47	-0.362443	3.07557e-05	6732.66	-0.52012	Actin-5C [Trichinella pseudospiralis]	0.9875		GO:0005524;GO:0005856;GO:0005737
CGI_10009887	-0.654436	1.2214e-05	81.9481	-0.350053	0.0169763	75.1529	-0.559419	5.71811e-05	80.4456	-0.521302	sulfate transporter-like	0.6465		GO:0008271;GO:0016021;GO:1902358
CGI_10025643	-0.377502	3.69534e-06	488.078	-0.588444	2.55224e-10	553.965	-0.61651	4.78872e-16	549.35	-0.527485	PREDICTED: uncharacterized protein LOC105328625 [Crassostrea gigas]	1		GO:0016021
CGI_10009228	-0.47986	0.000243981	301.675	-0.263747	0.0485325	287.762	-0.842425	2.01033e-16	359.36	-0.528677	paramyosin-like isoform X1 [Crassostrea gigas]	0.534		unknown
CGI_10009793	-0.404899	4.46655e-16	939.081	-0.564275	4.27797e-25	1042.76	-0.618124	3.12786e-20	1046.45	-0.529099	cubilin-like isoform X1 [Crassostrea gigas]	0.621		GO:0016021
CGI_10026866	-0.436377	2.28266e-06	328.374	-0.611335	1.10505e-10	367.095	-0.540312	4.05626e-09	349.37	-0.529342	mas-related G- coupled receptor member H-like [Crassostrea gigas]	0.75		GO:0016021
CGI_10027207	-0.441977	5.52271e-07	218.451	-0.699635	2.74893e-08	253.737	-0.447066	0.000246523	223.354	-0.529559	Fatty acid 2-hydroxylase	0.6665		GO:0005506;GO:0016491;GO:0016021;GO:0005783;GO:0055114;GO:0006633
CGI_10010024	-0.603441	0.00507905	82.7642	-0.565306	0.00736632	84.5088	-0.420344	0.0373425	77.8518	-0.529697	Tolloid 1	0.518		GO:0016021
CGI_10007937	-0.418242	0.0261168	52.0507	-0.76769	9.31009e-05	63.0816	-0.409387	0.0325389	52.7126	-0.531773	Polycystic kidney disease 1-like 2	0.701		GO:0016051;GO:0016021;GO:0008146
CGI_10011693	-0.386644	0.00110189	139.539	-0.703628	3.50028e-10	165.822	-0.505918	1.8481e-05	149.563	-0.532063	hypothetical protein CGI_10011693	0.945		GO:0005789;GO:0016021
CGI_10009585	-0.454961	0.003917	77.3436	-0.717246	2.64919e-07	89.9008	-0.42901	0.023871	77.9934	-0.533739	Multiple epidermal growth factor-like domains 10	0.6675		unknown
CGI_10007031	-0.554036	9.41992e-07	126.117	-0.559141	1.25282e-07	131.617	-0.495357	0.000268158	125.732	-0.536178	UDP- c:betaGal beta-1,3-N-acetylglucosaminyltransferase 1	0.6955		GO:0016757;GO:0008152
CGI_10019698	-0.477002	0.00030617	1291.9	-0.408781	0.00195677	1306.56	-0.730724	3.75322e-10	1467.05	-0.538836	carboxylesterase 1C-like	0.679		GO:0008152;GO:0016787
CGI_10026868	-0.70405	6.72838e-08	6113.62	-0.391655	6.82802e-07	5564.45	-0.521723	1.53176e-11	5751.24	-0.539143	Retinal dehydrogenase 1	0.8395		GO:0004029;GO:0001758;GO:0055114
CGI_10017194	-0.486712	2.39579e-21	895.048	-0.371568	6.39132e-08	889.5	-0.760037	6.65242e-29	1025.62	-0.539439	sorbitol dehydrogenase-like	0.836		GO:0008270;GO:0016491;GO:0055114
CGI_10001398	-0.460617	0.00343455	166.372	-0.661054	1.88288e-07	187.883	-0.502327	0.00110676	172.516	-0.541333	probable G- coupled receptor 157	0.599		GO:0004930;GO:0007186;GO:0016021;GO:0007166
CGI_10016161	-0.593187	3.83918e-07	178.607	-0.46931	0.000111498	176.383	-0.562161	6.51824e-06	179.677	-0.541553	zinc finger 626-like [Crassostrea gigas]	0.623		GO:0003676;GO:0046872
CGI_10009684	-0.626735	8.17437e-08	126.236	-0.544261	0.000256156	127.258	-0.461727	0.00034379	120.253	-0.544241	hypothetical protein CGI_10009684	0.583		unknown
CGI_10003667	-0.462946	7.14663e-05	99.074	-0.704258	2.25914e-09	113.954	-0.468845	0.000873027	101.17	-0.54535	U6 snRNA-associated Sm LSm1	0.8685		unknown
CGI_10012911	-0.637615	0.000221179	100.554	-0.679622	2.37129e-08	105.858	-0.320735	0.0365514	89.6967	-0.545991	gastrula zinc finger -like	0.56		GO:0003676;GO:0046872
CGI_10025438	-0.454517	0.000621295	83.4786	-0.72381	2.22167e-09	97.4582	-0.468283	0.000400277	85.7021	-0.54887	von Willebrand factor type EGF and pentraxin domain-containing 1	0.7345		GO:0016021
CGI_10013357	-0.424182	0.000160663	241.787	-0.920419	2.75851e-14	312.335	-0.303302	0.0132634	235.419	-0.549301	Adenosine deaminase	0.7175		GO:0009168;GO:0019239
CGI_10026440	-0.653408	0.000259937	42.5948	-0.44881	0.0278723	40.6385	-0.549236	0.0135195	41.7014	-0.550485	PREDICTED: uncharacterized protein LOC105326493 isoform X1 [Crassostrea gigas]	0.995		unknown
CGI_10014585	-0.45161	0.00142481	111.894	-0.617565	3.20043e-06	124.854	-0.586102	0.000153531	121.111	-0.551759	flocculation FLO10-like [Crassostrea gigas]	0.7395		GO:0016020;GO:0019028
CGI_10021878	-0.794436	1.251e-13	202.2	-0.339865	0.000864288	173.599	-0.521585	3.00155e-07	183.285	-0.551962	carbohydrate sulfotransferase 1-like	0.5825		GO:0008152;GO:0016021;GO:0016740
CGI_10003900	-0.380706	0.0304939	77.2798	-0.633512	4.74928e-06	89.0467	-0.654803	0.0031666	88.9621	-0.55634	multiple epidermal growth factor-like domains 10	0.663		GO:0016791;GO:0016311
CGI_10005094	-0.517547	0.000588982	57.2648	-0.508388	0.00945262	59.5331	-0.643883	1.17991e-05	61.6242	-0.556606	vacuolar sorting-associated 13A-like	0.88		GO:0045053;GO:0070062;GO:0005829;GO:1905090;GO:0005741;GO:0019898;GO:0006623;GO:0007005
CGI_10022421	-0.56251	1.05308e-14	415.229	-0.465781	7.55874e-10	415.193	-0.64777	6.6302e-15	439.557	-0.558687	pyruvate kinase PKM-like	0.862		GO:0000287;GO:0004743;GO:0030955;GO:0006096;GO:0016301
CGI_10027622	-0.82799	3.23146e-27	348.234	-0.319214	0.000118329	293.057	-0.530004	5.51426e-11	312.288	-0.559069	guanine nucleotide exchange factor VAV2 isoform X8 [Bos taurus]	0.589		GO:0050794;GO:0050790;GO:0016310;GO:0044763;GO:0016301
CGI_10003730	-0.434835	0.0286088	89.4386	-0.822048	2.64515e-06	110.024	-0.429828	0.0470651	90.9414	-0.562237	hypothetical protein CGI_10003730	0.9		unknown
CGI_10027919	-0.418447	1.6877e-05	159.847	-0.296109	0.0157221	158.696	-0.972324	1.74363e-31	207.314	-0.562293	MAP3K12-binding inhibitory partial	0.7135		GO:0005634
CGI_10025897	-0.478322	0.0363343	28.4858	-0.559587	0.012093	30.7063	-0.653751	0.00293159	31.357	-0.563887	hypothetical protein CGI_10025897	0.992		GO:0016021
CGI_10021173	-0.306407	0.0234913	93.4244	-0.782909	3.21333e-13	118.551	-0.604226	2.11744e-06	107.676	-0.564514	ARL14 effector -like isoform X1	0.753		GO:0003677
CGI_10024483	-0.322977	0.0055624	368.212	-0.747465	2.68292e-11	457.464	-0.624226	1.0755e-09	424.797	-0.564889	hypothetical protein CGI_10024483	0.8667		unknown
CGI_10007651	-0.559698	3.09884e-12	298.697	-0.51037	8.50823e-09	304.778	-0.633228	1.51994e-14	314.443	-0.567765	Mediator of RNA polymerase II transcription subunit 18	0.745		GO:0070847;GO:0016592;GO:0006508;GO:0006369;GO:0001104;GO:0008237;GO:0006357
CGI_10016255	-0.507064	0.00308665	114.685	-0.692414	2.32898e-05	129.21	-0.505083	0.0134411	117.187	-0.568187	voltage-dependent calcium channel gamma-2 subunit-like [Biomphalaria glabrata]	0.562		GO:0016021
CGI_10001410	-0.593891	7.22532e-08	138.027	-0.363843	0.00370951	130.444	-0.748331	1.86056e-07	150.894	-0.568688	brefeldin A-inhibited guanine nucleotide-exchange 3-like	0.5535		unknown
CGI_10025740	-0.463489	0.0154903	163.32	-0.471257	0.000144208	169.994	-0.784035	1.29445e-12	190.498	-0.572927	Carboxypeptidase B	0.612		GO:0008061;GO:0006030;GO:0005576
CGI_10023255	-0.413065	0.000115924	211.697	-0.550069	4.33132e-10	232.485	-0.758299	3.59264e-06	250.89	-0.573811	retinal-binding -like isoform X1 [Crassostrea gigas]	0.7035		GO:0016021;GO:0006810
CGI_10017009	-0.688596	5.31287e-15	365.084	-0.712032	1.17502e-13	383.752	-0.332561	0.000201736	321.748	-0.57773	cytoplasmic phosphatidylinositol transfer 1 isoform X2	0.6725		GO:0005515;GO:0005737;GO:0007165;GO:0015914;GO:0008526;GO:0005654
CGI_10023080	-0.426609	0.000161852	211.011	-0.899454	1.00332e-14	269.474	-0.410543	0.000906677	213.94	-0.578869	hypothetical protein CGI_10023080	0.774		GO:0016021
CGI_10020545	-0.270464	0.00919796	167.833	-1.04948	1.61043e-24	244.706	-0.418516	7.69161e-05	181.922	-0.579486	trichohyalin-like isoform X1 [Crassostrea gigas]	0.8994		GO:0007165;GO:0005509;GO:0016021;GO:0007156
CGI_10017277	-0.693281	0.00124378	46.8567	-0.498422	0.00665343	44.5227	-0.550682	0.0107218	44.9703	-0.580795	hypothetical protein CGI_10017277	0.8867		GO:0016021
CGI_10020762	-0.798798	9.15114e-08	177.499	-0.424156	6.49042e-05	156.72	-0.522817	6.58908e-07	159.966	-0.581924	death domain-containing 1-like	0.5685		GO:0007165
CGI_10023932	-0.290323	0.0378992	1740.07	-0.706301	1.18739e-05	2157.81	-0.751482	9.14933e-20	2144.12	-0.582702	pancreatic triacylglycerol lipase-like isoform X1 [Megachile rotundata]	0.6095		GO:0008152;GO:0005576;GO:0052689
CGI_10012924	-0.461541	0.000254996	92.2834	-0.618335	3.31408e-06	102.769	-0.670601	7.3585e-08	102.894	-0.583492	solute carrier family 23 member 2-like	0.603		GO:0003677;GO:0055085;GO:0016021;GO:0006310;GO:0015074;GO:0005215
CGI_10025281	-0.560405	0.000254957	67.4216	-0.627965	5.74112e-05	72.1439	-0.562618	6.46933e-05	68.6273	-0.583663	von Willebrand factor type EGF and pentraxin domain-containing 1-like	0.624		GO:0016021
CGI_10014062	-0.870739	1.25579e-14	193.104	-0.227808	0.049764	153.401	-0.675883	2.35216e-07	180.706	-0.591477	[Nematostella vectensis]	0.6645		GO:0016021
CGI_10014865	-0.631284	0.000284878	164.377	-0.532711	0.000167952	163.584	-0.614422	2.5722e-07	165.897	-0.592806	hypothetical protein CGI_10014865	0.8345		GO:0008270;GO:0016021
CGI_10002020	-0.492075	0.0131498	46.6535	-0.874595	2.48602e-06	57.7604	-0.415963	0.0480479	46.29	-0.594211	Neurogenic locus notch 1	0.683		GO:0005509
CGI_10006160	-0.620423	8.22408e-06	954.24	-0.777932	6.50001e-11	1062.17	-0.387405	0.012784	883.897	-0.595253	---NA---	0		unknown
CGI_10026034	-0.532532	0.000174011	261.349	-0.68673	2.97352e-07	290.126	-0.577484	0.000133797	271.685	-0.598915	probable serine threonine- kinase pats1	0.5375		GO:0005525;GO:0007264;GO:0008233;GO:0016310;GO:0016301;GO:0005622
CGI_10009612	-0.561226	1.44964e-09	413.15	-0.514906	1.73048e-09	421.429	-0.721764	1.18604e-17	451.276	-0.599299	Fatty acid-binding adipocyte	0.619		GO:0008289;GO:0006810;GO:0050789;GO:0005215
CGI_10012822	-0.517239	9.99315e-08	5362.58	-0.587165	7.87277e-14	5738.63	-0.697822	5.48546e-15	5903.25	-0.600742	balbiani ring 3-like	0.6245		GO:0008270;GO:0006508;GO:0004222
CGI_10015838	-0.744972	0.000112287	95.2177	-0.37664	0.0206541	84.2339	-0.686807	1.06994e-05	94.2926	-0.602806	sialin-like [Biomphalaria glabrata]	0.7885		GO:0055085;GO:0016021
CGI_10014624	-0.465472	5.91414e-05	240.411	-0.939281	1.56476e-16	307.568	-0.415157	0.00152712	240.743	-0.606637	methionine--tRNA cytoplasmic isoform X2	0.7335		GO:0005524;GO:0004825;GO:0006431;GO:0005829
CGI_10002830	-0.650053	1.18096e-06	88.5555	-0.407331	0.00269854	83.1518	-0.76835	6.15854e-10	95.1278	-0.608578	transport Sec16A	0.88		unknown
CGI_10026236	-0.778664	3.03169e-07	90.8638	-0.644269	2.90568e-06	88.9246	-0.404638	0.0156747	79.1531	-0.60919	cholecystokinin receptor type A-like [Crassostrea gigas]	0.5585		GO:0004930;GO:0007186;GO:0016021
CGI_10006832	-0.723647	4.55966e-05	48.0265	-0.703341	4.81184e-05	49.4837	-0.402399	0.0380027	42.5507	-0.609796	dystroglycan-like isoform X2	0.554		GO:0005509;GO:0016021
CGI_10005572	-0.759341	0.000100273	255.202	-0.649438	0.000590192	252.13	-0.424329	0.0371993	224.67	-0.611036	hypothetical protein CGI_10005572	1		unknown
CGI_10010153	-0.692522	2.73659e-11	1407.19	-0.281011	0.0388468	1237.19	-0.859736	1.90848e-30	1542.65	-0.61109	Serine protease inhibitor dipetalogastin	0.6205		GO:0006508;GO:0008233
CGI_10028795	-0.535656	2.66905e-09	573.287	-0.293275	0.00265441	541.37	-1.01216	6.8794e-28	722.417	-0.613696	Blastula protease 10	0.7		GO:0046872;GO:0006508;GO:0004197;GO:0008237
CGI_10023931	-0.432605	0.0336499	394.091	-0.655984	1.97934e-05	449.57	-0.75558	0.000174092	463.634	-0.614723	pancreatic triacylglycerol lipase-like	0.5965		GO:0008152;GO:0005576;GO:0052689
CGI_10024890	-0.634478	0.0134071	72.6006	-0.480328	0.0219266	70.0598	-0.729877	0.000312336	76.6789	-0.614894	hypothetical protein CGI_10024890	1		unknown
CGI_10008609	-0.348921	0.000287825	297.839	-0.800899	1.01244e-14	375.009	-0.705296	3.68359e-15	352.156	-0.618372	suppressor of tumorigenicity 14 homolog	0.556		unknown
CGI_10021344	-1.2223	1.11322e-29	256.172	-0.280263	0.0275813	175.745	-0.361753	0.000398147	177.746	-0.621437	focadhesin [Calypte anna]	0.5405		unknown
CGI_10023915	-0.558387	4.7269e-06	102.003	-0.508354	0.000241588	103.887	-0.801674	1.90171e-10	115.759	-0.622805	cAMP-regulated D2 -like	0.566		GO:0008152;GO:0004104
CGI_10023033	-0.537857	0.00763662	55.0754	-0.558689	0.00739484	57.7226	-0.779498	2.4986e-05	62.4974	-0.625348	multiple epidermal growth factor-like domains 10	0.631		unknown
CGI_10014221	-0.831159	4.23931e-05	42.1792	-0.437277	0.047975	36.7337	-0.61932	0.00338493	38.9248	-0.629252	hypothetical protein CGI_10014221	1		unknown
CGI_10027869	-0.443618	0.00234319	327.016	-0.587509	4.61974e-09	360.524	-0.860893	2.21726e-19	398.244	-0.630673	tctex1 domain-containing 2-like [Lingula anatina]	0.6655		unknown
CGI_10015464	-0.695316	1.88265e-07	105.823	-0.429301	0.00169073	98.2445	-0.768291	1.41495e-10	111.228	-0.630969	ankyrin repeat and SOCS box 8-like [Octopus bimaculoides]	0.5555		GO:0005622;GO:0035556
CGI_10024240	-0.589649	6.68415e-06	88.1092	-0.770588	1.42785e-10	98.9981	-0.535046	0.000226651	87.9448	-0.631761	rab GTPase-binding effector 1-like	0.7635		GO:0008083;GO:0046872;GO:0005096;GO:0006897;GO:0043547
CGI_10005994	-0.609024	0.00525848	30.7437	-0.769208	0.000196097	34.2848	-0.526852	0.0230554	30.1706	-0.635028	multiple epidermal growth factor-like domains 11	0.5655		GO:0016021
CGI_10003407	-0.491375	1.77282e-05	222.509	-0.733552	7.71216e-08	257.374	-0.687178	8.73211e-08	247.136	-0.637368	PREDICTED: uncharacterized protein LOC105320765 [Crassostrea gigas]	1		GO:0016021
CGI_10014952	-0.465549	0.0188676	55.7678	-0.804899	2.42088e-06	67.2199	-0.655968	0.000825088	61.7626	-0.642139	zinc finger 595-like [Crassostrea gigas]	0.507		GO:0003676;GO:0046872
CGI_10003097	-0.591968	1.26915e-08	232.8	-0.673541	1.45667e-07	251.249	-0.669428	3.20054e-09	245.586	-0.644979	Polycystic kidney disease 1-like 2	0.649		GO:0005509;GO:0016021
CGI_10009406	-0.722654	0.00125227	55.3714	-0.537425	0.0249927	52.9663	-0.676892	0.00156129	55.1433	-0.645657	monocarboxylate transporter 14-like [Crassostrea gigas]	0.5555		GO:0055085;GO:0016021
CGI_10003928	-0.623963	9.47021e-06	233.73	-0.712717	1.49186e-13	251.965	-0.615223	4.87714e-10	236.652	-0.650634	long-chain fatty acid transport 6-like isoform X3	0.6275		GO:0001676;GO:0006633;GO:0004467
CGI_10008897	-0.669631	0.00215013	660.907	-0.535629	0.002347	644.756	-0.747579	1.10239e-06	692.712	-0.650947	fibrillin-1-like [Crassostrea gigas]	0.676		GO:0007160;GO:0005509
CGI_10005059	-0.551489	0.0130189	33.2983	-0.696799	0.00186845	37.0715	-0.706281	0.00127833	36.4607	-0.651523	Endo-1,3(4)-beta-glucanase 1	0.5867		unknown
CGI_10028297	-0.733965	5.43739e-07	178.01	-0.721322	4.11628e-08	183.651	-0.50387	0.000220521	164.236	-0.653052	Solute carrier family 23 member 2	0.71		GO:0055085;GO:0016021;GO:0005215
CGI_10006715	-0.686255	1.64165e-17	498.101	-0.873992	9.71738e-23	563.331	-0.409833	8.6605e-07	453.101	-0.656693	proline-rich 2-like	0.778		GO:0016021
CGI_10028477	-0.480116	0.0195779	1141.28	-1.07594	5.03156e-16	1544.55	-0.417755	0.00159674	1129.73	-0.657936	RING finger and WD repeat domain-containing 3	1		GO:0008270
CGI_10017996	-0.536566	0.00228461	73.9812	-0.609065	0.00419215	79.786	-0.838906	0.000428164	87.4647	-0.661512	zinc finger CW-type PWWP domain 1-like	0.587		GO:0008270
CGI_10028283	-0.942193	2.51906e-15	285.561	-0.552755	1.87696e-10	249.539	-0.489797	0.000107055	238.549	-0.661582	Receptor-type tyrosine- phosphatase T	0.747		GO:0003735;GO:0006471;GO:0004725;GO:0005840;GO:0035335;GO:0003950;GO:0006412
CGI_10009659	-1.00078	1.50021e-19	110.605	-0.330999	0.0192471	85.9925	-0.665084	9.67689e-08	96.7	-0.66562	multiple epidermal growth factor-like domains 10	0.78		GO:0016020
CGI_10003883	-0.913966	5.64132e-11	168.356	-0.524137	0.000761618	147.213	-0.567426	0.00321366	147.429	-0.66851	multiple epidermal growth factor-like domains 10	0.718		GO:0016021
CGI_10011416	-0.817313	2.82877e-09	212.153	-0.617794	0.00010293	202.296	-0.576635	6.53151e-06	194.413	-0.670581	hypothetical protein CGI_10011416	0.98		unknown
CGI_10018656	-0.759923	0.00203748	193.843	-0.516837	0.0319547	180.02	-0.738387	0.00103985	194.922	-0.671716	melatonin receptor type 1B-like	0.7065		GO:0004930;GO:0007186;GO:0016021
CGI_10010026	-0.905712	1.711e-08	978.428	-0.608281	2.32184e-05	887.625	-0.510576	0.00651009	837.349	-0.674856	fatty acid-binding homolog 6-like isoform X1 [Crassostrea gigas]	0.7817		unknown
CGI_10026218	-0.418066	0.00901739	140.352	-0.641645	1.00071e-06	160.137	-0.965629	1.53753e-14	181.509	-0.675113	acidic fibroblast growth factor intracellular-binding	0.732		GO:0017134
CGI_10026430	-0.706053	3.34709e-07	96.4675	-0.643333	1.34537e-06	97.6992	-0.676816	1.07867e-08	96.9543	-0.675401	trans-1,2-dihydrobenzene-1,2-diol dehydrogenase-like	0.6315		GO:0016491;GO:0055114
CGI_10016857	-0.731377	0.000537606	37.3003	-0.574027	0.0157633	36.2183	-0.721448	0.00144483	37.9215	-0.675617	exosome complex component RRP4	0.8465		GO:0034475;GO:0043928;GO:0000467;GO:0000177;GO:0000176;GO:0030307;GO:0071051;GO:0003723;GO:0071035;GO:0004527;GO:0071034;GO:0071038;GO:0071049;GO:0034427
CGI_10003966	-0.329878	0.00260667	412.886	-0.55327	1.34939e-09	470.227	-1.15702	5.57766e-34	605.691	-0.680057	MAM and LDL-receptor class A domain-containing 1-like	0.5255		GO:0016020
CGI_10022050	-0.511781	2.94455e-05	159.468	-1.00343	9.9421e-19	206.528	-0.528789	0.000960115	164.403	-0.681333	cell death abnormality 1-like	0.7635		GO:0003723
CGI_10008795	-0.387573	0.0273038	63.4293	-0.622494	1.71905e-05	72.6624	-1.03424	1.13304e-10	86.1121	-0.681435	hypothetical protein CGI_10008795	0.715		GO:0016021
CGI_10027418	-0.30296	0.0087298	917.168	-1.15833	2.84969e-21	1392.29	-0.583319	2.80973e-05	1050.3	-0.681538	cathepsin L1-like	0.6865		GO:0006508;GO:0008234
CGI_10013404	-0.801167	3.23488e-06	66.5298	-0.767887	1.70293e-06	68.1247	-0.483632	0.0144866	59.1838	-0.684228	homeobox not2- partial	0.7385		GO:0005634;GO:0007507;GO:0048729;GO:0048598;GO:0035295;GO:0006355;GO:0043565;GO:0048568;GO:0060429
CGI_10023400	-0.760819	6.09699e-09	535.429	-0.645084	7.45174e-09	528.827	-0.6488	4.54991e-05	521.398	-0.684901	DBH-like monooxygenase 1 [Crassostrea gigas]	0.5385		GO:0005507;GO:0016715;GO:0055114
CGI_10009663	-0.570415	0.034035	93.0368	-0.644375	0.000759265	99.0946	-0.841463	2.40952e-05	106.506	-0.685418	hypothetical protein CGI_10009663	0.995		GO:0016021
CGI_10014623	-0.616691	6.85571e-05	144.398	-1.05292	2.44736e-11	183.588	-0.396253	0.0140377	134.271	-0.688621	methionine--tRNA cytoplasmic isoform X2	0.7045		GO:0005524;GO:0006418;GO:0070062;GO:0004825;GO:0016020;GO:0005829
CGI_10006879	-0.694244	0.000446579	201.935	-0.741585	3.31723e-09	212.896	-0.632192	1.44528e-07	198.956	-0.689341	glycosyl hydrolase	0.559		GO:0003824;GO:0008152
CGI_10008384	-0.550845	3.37871e-07	128.083	-0.664371	2.19129e-06	140.435	-0.86477	1.04221e-16	149.76	-0.693328	F-box LRR-repeat 7-like	0.5655		GO:0008063
CGI_10005095	-0.539827	0.00011408	514.169	-0.776789	6.34224e-13	591.39	-0.770224	4.02384e-08	580.05	-0.695613	trophoblast Kunitz domain 1-like	0.63		GO:0004867;GO:0010951
CGI_10025748	-0.942417	5.53061e-07	91.2108	-0.634328	0.0018105	82.1798	-0.511106	0.0132008	76.3785	-0.69595	probable iron ascorbate oxidoreductase DDB_G0283291	0.691		GO:0005506;GO:0016491;GO:0055114
CGI_10022491	-0.314605	0.00152146	217.441	-0.954335	4.52757e-18	297.876	-0.828737	1.64068e-21	274.736	-0.699226	neo-calmodulin-like isoform X1	0.854		GO:0005509
CGI_10020751	-0.930608	5.55058e-25	821.082	-0.643096	1.33416e-08	752.92	-0.537469	0.00619193	710.301	-0.703725	dual specificity phosphatase 3-like	0.696		GO:0004725;GO:0035335;GO:0008138
CGI_10020761	-0.9121	1.97239e-19	283.174	-0.558353	8.34751e-12	251.84	-0.649519	4.45392e-17	256.409	-0.706657	death domain-containing 1-like	0.6053		unknown
CGI_10011199	-0.871549	6.13462e-08	491.416	-0.782355	1.06299e-07	489.721	-0.469561	0.00596501	419.856	-0.707821	byssal -3	0.608		GO:0016021
CGI_10007887	-0.689625	5.52271e-07	1211.55	-0.875504	2.85384e-15	1366.4	-0.572219	0.000804968	1177.04	-0.712449	PREDICTED: uncharacterized protein LOC105327706 [Crassostrea gigas]	0.77		unknown
CGI_10003222	-0.568738	0.00201094	44.4715	-0.748597	3.04422e-05	50.0387	-0.820882	1.23833e-06	50.742	-0.712739	leucine-rich repeat-containing 74B-like [Crassostrea gigas]	0.646		GO:0005509;GO:0008063
CGI_10027397	-0.839283	0.0284573	35.3457	-0.611212	0.0354286	31.5589	-0.6958	0.00951015	32.1075	-0.715432	mammalian ependymin-related 1-like	0.742		GO:0007160;GO:0005509;GO:0005576
CGI_10001090	-0.669883	0.0151612	1634.16	-0.898702	0.000520355	1892.95	-0.601146	0.00897484	1602.49	-0.723244	EF hand calcium-binding family [Medicago truncatula]	0.7057		GO:0000166;GO:0004713;GO:0005509;GO:0006468
CGI_10003523	-0.937728	1.76661e-05	662.528	-0.658497	0.000651636	601.365	-0.575237	0.0243041	572.379	-0.723821	hypothetical protein CGI_10003523	0.8656		unknown
CGI_10011735	-0.426196	0.0128046	139.755	-0.916496	9.54817e-09	180.601	-0.829429	6.64029e-06	170.78	-0.724041	insulin-like growth factor-binding complex acid labile subunit	0.477		unknown
CGI_10021525	-0.800131	0.00260305	24.2655	-0.751694	0.0028953	24.4655	-0.62415	0.0136121	22.6927	-0.725325	Potassium voltage-gated channel Shab	0.6585		GO:0005249;GO:0071805;GO:0008076;GO:0034765;GO:0051260
CGI_10003929	-0.742301	5.81626e-06	76.5615	-0.609683	0.000300453	75.1177	-0.830016	9.5052e-10	80.9285	-0.727333	long-chain fatty acid transport 4-like [Nasonia vitripennis]	0.71		GO:0001676;GO:0016020;GO:0006633;GO:0004467
CGI_10011202	-0.882768	1.07455e-11	95.0154	-0.418244	0.00487507	80.7411	-0.88129	2.20626e-13	96.5648	-0.727434	NC domain [Yersinia frederiksenii]	0.534		unknown
CGI_10001747	-0.769717	3.91536e-12	318.413	-0.42539	9.84091e-06	286.014	-0.988664	4.67699e-40	357.728	-0.727924	hypothetical protein CGI_10001747	0.8317		unknown
CGI_10008618	-0.885065	0.00101226	33.53	-0.744836	0.0185468	32.8383	-0.561532	0.0236057	29.1045	-0.730478	Beta-hexosaminidase	0.7475		GO:0005975;GO:0030246;GO:0004563
CGI_10021168	-0.7821	7.36669e-07	109.997	-0.742806	3.30793e-05	112.526	-0.709927	2.17162e-05	108.608	-0.744944	hypothetical protein CGI_10021168	1		GO:0016021
CGI_10005265	-0.607291	0.0188499	22.9419	-1.1363	8.92273e-06	31.167	-0.491575	0.0443466	22.1875	-0.745055	hypothetical protein CGI_10005265	1		unknown
CGI_10000974	-0.918971	1.20543e-07	55.2726	-0.669135	0.000421389	51.3149	-0.652795	0.000176754	49.9366	-0.746967	megakaryocyte-associated tyrosine- kinase isoform X2 [Anser cygnoides domesticus]	0.545		GO:0005524;GO:0004672;GO:0006468
CGI_10024741	-0.811664	0.0021893	21.2188	-0.672965	0.0152378	20.6404	-0.759432	0.00578287	21.1482	-0.748021	PREDICTED: uncharacterized protein LOC105347701 isoform X1	0.6945		unknown
CGI_10023998	-0.649076	6.39813e-08	108.586	-0.766166	2.33951e-12	118.734	-0.832319	1.58355e-13	120.088	-0.749187	atrial natriuretic peptide receptor 3-like	0.5915		GO:0016021
CGI_10006054	-0.962149	7.90871e-08	207.937	-0.417771	0.00228234	168.997	-0.878701	6.35419e-09	202.723	-0.752874	hypothetical protein CGI_10006054	0.98		unknown
CGI_10023224	-0.711131	6.41317e-05	66.5989	-0.853916	5.11768e-05	74.4567	-0.700375	0.000459563	67.9093	-0.755141	[Nematostella vectensis]	0.546		GO:0046872
CGI_10002738	-0.850664	3.42736e-06	50.6157	-0.939101	8.26872e-06	55.0277	-0.478574	0.0423749	43.7614	-0.756113	caveolin-1-like [Crassostrea gigas]	0.861		GO:0005901;GO:0070836;GO:0016021;GO:0000139
CGI_10025859	-0.432739	0.0441177	174.167	-0.688171	0.00554007	203.831	-1.15088	2.94787e-17	244.714	-0.757262	HCLS1-binding 3-like	0.79		GO:0035091
CGI_10005423	-1.00717	6.2757e-12	71.8068	-0.848759	1.49883e-07	69.4415	-0.421575	0.0498406	56.6789	-0.759168	beta-lactamase 4	0.6215		unknown
CGI_10005475	-0.915616	5.64089e-07	47.2538	-0.875478	3.71734e-07	48.0921	-0.494204	0.0414193	39.9555	-0.761766	PREDICTED: uncharacterized protein LOC105325922 [Crassostrea gigas]	1		unknown
CGI_10010039	-0.503459	0.00293413	91.2375	-0.751272	1.10902e-07	105.544	-1.03145	2.095e-12	117.837	-0.762059	organic cation transporter	0.545		GO:0055085;GO:0022857;GO:0016021
CGI_10014981	-0.735597	6.8697e-13	201.978	-0.910586	2.84228e-18	227.143	-0.642241	3.20731e-13	197.551	-0.762808	amine oxidase	0.49		GO:0016491;GO:0055114
CGI_10011273	-0.495815	0.000475481	208.45	-0.412083	0.0101833	209.743	-1.38454	3.3274e-18	324.255	-0.764147	FMRFamide receptor [Crassostrea gigas]	0.6155		GO:0004930;GO:0007186;GO:0016021
CGI_10000061	-0.541145	0.000115129	76.4024	-0.935098	4.75831e-14	94.3756	-0.818676	1.09906e-08	87.8727	-0.764973	hypothetical protein CGI_10000061	1		unknown
CGI_10027652	-0.729875	0.000510099	217.262	-0.537534	9.4461e-05	205.863	-1.04325	3.98884e-17	253.134	-0.770221	asialoglyco receptor 2-like	0.734		unknown
CGI_10014781	-0.548169	0.0241656	31.2837	-0.758502	0.000185087	35.5502	-1.00551	1.90928e-07	39.2557	-0.770726	neuronal acetylcholine receptor subunit alpha-10-like	0.6305		GO:0004889;GO:0045211;GO:0098655;GO:0016021;GO:0030054
CGI_10003926	-0.72982	0.000709527	79.1381	-0.807146	3.52655e-07	84.6694	-0.777913	2.73298e-07	81.8573	-0.771626	hypothetical protein CGI_10003926	0.7571		unknown
CGI_10013280	-1.05202	1.34085e-17	1270.75	-0.686746	4.35985e-10	1116.46	-0.581474	0.000223814	1049.72	-0.773415	hypothetical protein CGI_10013280	1		unknown
CGI_10004569	-0.831443	0.00606496	12.2046	-0.856931	0.00734629	12.9286	-0.645585	0.049327	11.4022	-0.777986	Solute carrier family 35 member E1	0.867		GO:0016021
CGI_10022385	-0.588768	0.0429402	16.8673	-0.720228	0.00811731	18.5977	-1.02874	0.00017215	21.4361	-0.779246	Peroxisomal sarcosine oxidase	0.719		GO:0016491;GO:0055114
CGI_10028571	-0.76205	1.02401e-09	591.405	-0.820567	4.99228e-19	629.833	-0.761833	7.95324e-15	602.145	-0.781483	cysteine and tyrosine-rich 1-like	0.995		GO:0016021
CGI_10005807	-1.09448	1.39495e-13	66.66	-0.460611	0.0126893	52.0995	-0.797836	1.80705e-07	59.1039	-0.784309	probable UDP-sugar transporter SLC35A4	0.8617		GO:0015992;GO:0016021;GO:0008643;GO:0005351;GO:0000139
CGI_10010080	-0.973097	1.2772e-09	162.872	-0.728574	4.01377e-05	151.231	-0.658745	0.000204704	143.755	-0.786805	Carcinoembryonic antigen-related cell adhesion molecule 5	0.7805		GO:0016020
CGI_10012257	-0.896787	0.00446755	22.6652	-0.738286	0.0158486	21.5286	-0.737972	0.00371919	20.8481	-0.791015	Prolow-density lipo receptor-related 1	0.7475		GO:0016021
CGI_10022081	-0.558496	0.0213193	22.9657	-0.912595	0.000174189	28.2626	-0.90563	6.50467e-05	27.505	-0.79224	methyltransferase DDB_G0268948 isoform X1 [Aplysia californica]	0.6295		GO:0008168;GO:0032259
CGI_10022067	-0.809258	5.07162e-05	55.5408	-1.03571	2.529e-08	64.2019	-0.540912	0.00198494	49.9541	-0.795294	insulin-like growth factor-binding complex acid labile subunit isoform X2 [Crassostrea gigas]	0.626		GO:0016021;GO:0008063
CGI_10011494	-0.938623	1.6726e-06	450.444	-0.835095	9.82014e-07	443.631	-0.630721	0.000751767	397.15	-0.80148	transforming growth factor-beta-induced ig-h3-like	0.639		GO:0044421
CGI_10028131	-0.943722	4.03555e-08	47.3901	-0.47468	0.0148685	39.9609	-0.987722	4.51586e-10	49.0536	-0.802041	chaoptin [Tribolium castaneum]	0.624		GO:0016021;GO:0008063
CGI_10010375	-0.676128	0.0436578	11.161	-0.983766	0.00125131	13.4442	-0.78054	0.0227515	11.9349	-0.813478	Collagen 7	0.9067		GO:0005581
CGI_10000472	-0.972813	7.52547e-18	143.998	-0.606111	0.00107712	127.581	-0.874921	3.86915e-12	140.286	-0.817948	probable phytanoyl- dioxygenase	0.7645		unknown
CGI_10016669	-0.562353	0.0155444	28.1987	-1.11865	1.13945e-06	38.4566	-0.776307	0.00026512	31.7741	-0.819102	hypothetical protein CGI_10016669	0.925		unknown
CGI_10004209	-0.890046	1.86978e-08	474.607	-0.618125	2.41017e-05	435.861	-0.963551	1.68899e-11	499.735	-0.823908	receptor-type tyrosine- phosphatase mu-like	0.6745		GO:0004725;GO:0035335
CGI_10010727	-0.575617	0.00383274	579.213	-0.965263	2.26897e-09	716.588	-0.93387	4.99431e-07	695.134	-0.824917	sulfotransferase 1C4-like [Crassostrea gigas]	0.7375		GO:0007229;GO:0008152;GO:0008146;GO:0007155;GO:0008305
CGI_10005726	-1.23808	1.24174e-15	577.114	-0.901731	2.58309e-10	508.47	-0.348093	0.0204411	392.167	-0.829303	carboxylesterase 1C-like	0.721		GO:0008152;GO:0016787
CGI_10004799	-0.610216	9.27616e-06	119.09	-0.723596	3.01566e-05	130.386	-1.15922	1.9689e-14	156.695	-0.83101	hypothetical protein CGI_10004799	0.8133		GO:0016021
CGI_10013237	-0.676217	0.00493624	23.7313	-1.06396	1.46663e-05	29.9991	-0.755652	0.00807676	25.2811	-0.831944	Glutamate decarboxylase 1	0.731		GO:0030170;GO:0019752;GO:0016831
CGI_10010664	-1.05639	4.36564e-08	1929.29	-0.386354	0.0232994	1475.85	-1.07603	4.20061e-11	1973.26	-0.839589	peripheral myelin 22-like [Crassostrea gigas]	0.6045		GO:0008172;GO:0005923;GO:0046872;GO:0016021;GO:0005198;GO:1901564;GO:0044237
CGI_10020528	-0.643975	0.00514559	41.1734	-1.03494	8.86975e-10	50.962	-0.841127	1.84805e-06	45.5421	-0.840013	glucose dehydrogenase [ quinone]-like	0.885		GO:0016614;GO:0050660;GO:0016021;GO:0055114
CGI_10005561	-0.849474	7.11096e-08	99.5482	-0.80478	1.97482e-07	101.339	-0.873748	3.2948e-08	102.59	-0.842667	cytidine deaminase-like	0.742		GO:0008270;GO:0005829;GO:0009972;GO:0004126
CGI_10015159	-0.49115	0.000592611	152.708	-1.06746	6.01674e-11	207.14	-0.984395	9.0106e-14	193.849	-0.847667	tetraspanin-1-like [Crassostrea gigas]	0.7885		GO:0008270;GO:0016491;GO:0016021;GO:0055114
CGI_10004259	-0.42959	0.0414211	47.7077	-1.19338	3.357e-09	71.1927	-0.92243	0.001106	62.2254	-0.848468	transmembrane GTPase Marf-like	0.6605		unknown
CGI_10023135	-0.941913	2.04631e-05	26.1548	-0.835715	0.000293631	25.8966	-0.771953	0.00144951	24.605	-0.84986	probable phosphatase 2C isoform X4 [Octopus bimaculoides]	0.867		GO:0004722;GO:0046872;GO:0006470
CGI_10026005	-0.683288	1.0977e-07	135.124	-1.01225	2.44493e-19	163.256	-0.863864	1.02306e-15	149.376	-0.853135	60 kDa SS-A Ro ribonucleo	0.5765		GO:0003723;GO:0030529;GO:0019013;GO:0009987
CGI_10025680	-1.00843	1.07242e-14	569.887	-0.791378	2.15381e-16	534.381	-0.759915	8.89261e-16	516.586	-0.85324	deacetylase Atu3266-like isoform X1	0.6875		GO:0016810;GO:0008152
CGI_10000708	-0.625811	0.00802055	66.6012	-0.913887	3.41326e-07	78.4435	-1.03454	3.75861e-08	81.8593	-0.858078	Zinc metallo ase nas-36	0.7627		GO:0008270;GO:0006508;GO:0004222
CGI_10011099	-0.853271	1.03531e-09	696.128	-0.804034	1.31567e-09	707.087	-0.919324	2.86033e-13	730.598	-0.858876	ubiquitin-like-specific protease 1	0.5538		GO:0008270
CGI_10025488	-1.06609	8.977e-20	197.171	-0.90995	6.80382e-12	191.041	-0.611654	7.17754e-08	163.67	-0.862564	beta-mannosidase-like isoform X1	0.692		GO:0005975;GO:0004553
CGI_10008878	-0.917019	3.40864e-11	111.201	-0.971721	1.32053e-11	118.899	-0.713782	8.2769e-08	103.375	-0.867507	Multiple epidermal growth factor-like domains 6	0.5105		GO:0016021
CGI_10024114	-0.874568	3.22078e-15	282.017	-0.525907	1.11372e-05	251.904	-1.20225	2.28138e-25	336.144	-0.867574	bifunctional coenzyme A synthase	0.6345		GO:0005524;GO:0004140;GO:0015937;GO:0016310
CGI_10028047	-0.470266	0.0414685	41.5201	-0.931358	1.44615e-07	52.8	-1.20467	5.51668e-12	59.1877	-0.868766	sphingolipid delta(4)-desaturase C4-hydroxylase DES2-like isoform X2 [Biomphalaria glabrata]	0.7705		GO:0070938;GO:0004768;GO:0042284;GO:0007283;GO:0007053;GO:0016021;GO:0055114;GO:0005886;GO:0016006;GO:0030148
CGI_10021501	-0.679439	7.26005e-05	106.968	-0.986118	1.41424e-12	127.685	-0.946927	7.45035e-13	122.89	-0.870828	[Nematostella vectensis]	0.6494		GO:0005634;GO:0006915
CGI_10025092	-0.725374	6.37405e-06	190.107	-0.765759	2.59162e-06	201.532	-1.12904	9.45684e-24	232.735	-0.873391	cytochrome P450 49a1	0.811		GO:0000287;GO:0004634;GO:0016491;GO:0006096;GO:0016021;GO:0000015
CGI_10023788	-0.762049	1.52529e-05	56.9136	-0.898051	3.16602e-07	63.1174	-0.969456	3.4726e-07	64.4427	-0.876518	PREDICTED: uncharacterized protein LOC105348758 isoform X1 [Crassostrea gigas]	0.99		unknown
CGI_10021687	-1.06315	6.02748e-13	114.29	-0.355583	0.0476974	86.7524	-1.21272	4.52636e-20	125.017	-0.877152	Vacuolar 8	0.683		GO:0007165
CGI_10020235	-0.557908	0.0105222	29.8321	-1.16631	0.000172354	43.2717	-0.908469	0.00338859	36.7551	-0.877564	PREDICTED: uncharacterized protein LOC105323680	0.886		unknown
CGI_10019141	-1.29549	2.20579e-21	153.422	-0.793961	9.66692e-08	125.556	-0.556046	0.00348417	111.138	-0.881832	spermine synthase-like	0.6905		GO:0016768;GO:0006597
CGI_10003135	-0.863353	0.00554959	31.6104	-0.72903	0.0295253	30.7505	-1.07061	1.64076e-05	35.1657	-0.887664	IMPACT	0.6805		unknown
CGI_10000774	-1.34379	8.65038e-17	98.3112	-0.637302	0.000550855	73.0661	-0.696135	0.000110621	73.496	-0.892408	ATP synthase subunits region ORF 7	0.686		GO:0009260;GO:0007155;GO:0009201;GO:0030246;GO:0042455
CGI_10018655	-1.17589	1.08736e-05	53.1281	-0.767887	0.00365813	44.6061	-0.73642	0.00349342	43.001	-0.8934	[Nematostella vectensis]	0.565		GO:0008063
CGI_10023975	-0.914538	3.49759e-09	60.2259	-0.746748	0.0202443	59.7281	-1.03378	1.64187e-13	64.8371	-0.898355	hypothetical protein CGI_10023975	0.6935		GO:0016020
CGI_10013336	-0.924207	5.25214e-07	46.3617	-1.09899	3.27433e-11	52.3866	-0.673653	0.00028253	42.1148	-0.89895	urea-proton symporter DUR3-like	0.7055		GO:0071918;GO:0016021;GO:0015204
CGI_10008247	-0.74381	6.88667e-21	6207.15	-0.626806	8.14937e-19	6137.35	-1.33085	3.26374e-126	8324.51	-0.900489	Tubulin alpha-3 chain	0.9485		GO:0005525;GO:0005524;GO:0042626;GO:0055085;GO:0005737;GO:0003924;GO:0008152;GO:0016021;GO:0005200;GO:0005874;GO:0007017
CGI_10021063	-0.587203	0.00591742	71.9159	-0.869682	2.89845e-09	84.2718	-1.26504	4.11467e-18	100.045	-0.907307	serine protease inhibitor-1L	0.7		GO:0006508;GO:0008233
CGI_10026240	-1.10122	3.84159e-21	197.87	-0.646511	5.57006e-05	167.483	-0.98282	1.10246e-12	191.082	-0.910182	Blastula protease 10	0.6765		GO:0008270;GO:0016020;GO:0006508;GO:0004222
CGI_10006824	-0.946862	1.7264e-12	89.5879	-0.455227	0.00227518	74.9122	-1.34041	1.16112e-25	110.578	-0.914167	hypothetical protein CGI_10006824	0.7113		GO:0016020
CGI_10003001	-0.393766	0.00502606	712.238	-1.30406	6.41814e-30	1119.15	-1.04566	8.18599e-17	968.641	-0.914495	Receptor-type tyrosine- phosphatase U	0.616		GO:0004725;GO:0035335
CGI_10005291	-0.904151	7.91507e-05	29.1007	-1.0373	5.27099e-07	32.0922	-0.815046	0.000562456	28.4447	-0.918834	protocadherin Fat 3-like	0.687		GO:0005509;GO:0016021;GO:0007156;GO:0005886
CGI_10027487	-1.42388	6.49608e-06	25.125	-0.680883	0.0337791	17.0991	-0.673203	0.0270354	16.6347	-0.92599	multiple epidermal growth factor-like domains 10	0.6565		unknown
CGI_10004350	-1.00144	0.000168126	18.0003	-1.0059	0.000179453	18.7452	-0.781093	0.0100733	16.5698	-0.929476	multiple epidermal growth factor-like domains 11	1		unknown
CGI_10017765	-0.796607	7.83338e-05	36.345	-0.947776	2.66632e-07	40.411	-1.06209	3.67858e-07	42.1653	-0.93549	rhomboid family	0.553		GO:0006508;GO:0016021;GO:0004252
CGI_10023914	-0.914655	0.000266136	21.9892	-0.79019	0.00843487	21.7631	-1.10187	1.91135e-06	24.5561	-0.935571	lysine-specific demethylase 8-like	0.5765		GO:0005509
CGI_10016291	-1.02152	0.000104342	158.76	-1.0146	5.82422e-05	163.451	-0.772161	0.0118839	143.825	-0.936093	AAEL006011-PA [Aedes aegypti]	0.7493		unknown
CGI_10019831	-0.822662	2.18818e-05	35.0638	-1.29	4.29623e-12	45.8973	-0.702822	0.00025627	33.7497	-0.938494	cyclic nucleotide-binding domain-containing 2-like	0.505		unknown
CGI_10023588	-0.859459	1.49707e-06	244.473	-0.621103	0.000867212	228.278	-1.33821	7.16445e-13	316.999	-0.93959	hypothetical protein CGI_10023588	0.99		GO:0016021
CGI_10013640	-0.454753	8.94668e-07	775.859	-2.02413	0	1729.57	-0.3465	1.89372e-06	757.97	-0.941793	Adenosine deaminase	0.7205		GO:0065008;GO:0035295;GO:1901136;GO:0044464;GO:0048513;GO:0009168;GO:0042278;GO:0009966;GO:0002376;GO:0044712;GO:0048584;GO:0043066;GO:0045582;GO:0016020;GO:0034655;GO:0072523;GO:0072522;GO:0019239
CGI_10020608	-0.86528	1.86408e-07	134.359	-0.789244	2.33231e-12	134.066	-1.17601	2.70849e-14	158.801	-0.94351	hypothetical protein CGI_10020608	0.682		unknown
CGI_10002976	-1.00012	5.88989e-06	37.0699	-0.983656	4.82936e-05	38.3312	-0.854125	0.000218686	35.16	-0.945967	hypothetical protein CGI_10002976	1		unknown
CGI_10015920	-1.0344	5.41344e-37	301.822	-0.778538	1.24982e-08	280.649	-1.0256	3.71946e-16	308.368	-0.946181	neuroglian-like isoform X1 [Crassostrea gigas]	0.7745		GO:0016021
CGI_10022645	-0.901422	2.99965e-08	580.04	-1.02769	4.86102e-29	633.858	-0.915742	4.82455e-30	589.744	-0.948284	redox-regulatory FAM213A isoform X3 [Ovis aries]	0.726		GO:0016020
CGI_10003117	-1.4122	2.59646e-14	242.597	-0.961301	5.57549e-07	200.506	-0.472431	0.0191494	157.48	-0.948644	atrial natriuretic peptide receptor 1-like	0.591		GO:0016021
CGI_10021990	-1.05185	0.00167921	12.3395	-0.837961	0.0126114	11.2659	-0.964003	0.00345379	11.8222	-0.951273	hypothetical protein CGI_10021990	1		unknown
CGI_10020006	-0.770966	0.0163641	20.355	-0.71113	0.00780166	20.1727	-1.39988	3.96205e-09	28.0664	-0.960659	26S proteasome non-ATPase regulatory subunit 5-like	0.695		GO:0022624;GO:0043248
CGI_10000522	-0.750519	0.028625	10.0482	-1.09863	0.0007422	12.522	-1.04504	0.000840427	11.8312	-0.964731	ral GTPase-activating subunit beta-like	0.827		GO:0051056;GO:0005096;GO:0043547
CGI_10017153	-1.40298	5.01414e-11	32.4913	-0.506339	0.0498376	21.7197	-0.985612	1.40084e-05	26.7535	-0.964977	39S ribosomal mitochondrial [Schistosoma haematobium]	0.617		unknown
CGI_10005482	-0.964122	2.23526e-07	86.8458	-0.988813	3.82806e-11	90.5937	-0.947229	7.03278e-07	87.98	-0.966721	1-aminocyclopropane-1-carboxylate deaminase	0.782		GO:0005488
CGI_10015666	-0.704167	0.000858985	1102.81	-1.21305	5.55841e-13	1454.1	-1.01912	9.84173e-10	1294.84	-0.978778	uncharacterized protein LOC105330502 isoform X4	0		unknown
CGI_10013329	-0.825683	5.35743e-10	309.972	-1.5079	2.75668e-45	448.964	-0.616413	4.81144e-07	288.175	-0.983332	Steroid 17-alpha-hydroxylase 17,20 lyase	0.7885		GO:0005506;GO:0016705;GO:0016021;GO:0016829;GO:0055114;GO:0004497;GO:0020037
CGI_10025232	-0.900975	1.19194e-10	158.129	-1.43148	9.44023e-21	214.478	-0.624117	0.000940012	143.152	-0.985524	Transmembrane 19	0.7892		unknown
CGI_10007781	-0.95061	1.31506e-05	60.614	-1.4893	2.59551e-09	84.7394	-0.539758	0.0460711	51.2009	-0.993222	Glyoxylate hydroxypyruvate reductase A	0.643		GO:0051287;GO:0055114
CGI_10026960	-1.32524	3.09298e-11	38.8431	-1.11543	6.17192e-09	36.1365	-0.540494	0.0314475	27.283	-0.993721	SSUH2 homolog	0.684		GO:0003677
CGI_10024649	-1.00671	2.22398e-20	168.843	-1.14498	8.30342e-12	189.444	-0.830047	1.92115e-08	159.166	-0.993913	Voltage-gated hydrogen channel 1	0.9867		GO:0016021
CGI_10004210	-0.943873	8.76357e-11	252.518	-1.03655	1.33321e-21	273.058	-1.00324	8.12721e-16	264.022	-0.994554	receptor-type tyrosine- phosphatase mu-like	0.7115		GO:0004725;GO:0035335
CGI_10005017	-1.33539	7.86316e-14	334.836	-0.828124	1.56868e-05	271.03	-0.822213	8.5644e-06	264.769	-0.995241	hypothetical protein CGI_10005017	0.925		unknown
CGI_10014148	-0.858459	0.000533837	4109.07	-0.983583	1.75151e-08	4466.98	-1.14425	6.72992e-14	4719.14	-0.995431	transcription initiation factor TFIID subunit 5 isoform X2	0.907		GO:0005634;GO:0003743;GO:0006355;GO:0006413
CGI_10025961	-0.958246	4.56495e-06	168.044	-1.10535	9.71475e-12	185.82	-0.928575	1.50768e-06	168.273	-0.997389	chitin synthase	0.6585		GO:0016758;GO:0008152;GO:0016021
CGI_10023463	-1.04344	5.00062e-07	96.0103	-0.442238	0.032254	75.4136	-1.50893	5.04446e-26	122.229	-0.998201	importin-11-like [Lingula anatina]	0.715		GO:0005634;GO:0005737;GO:0008565;GO:0008536;GO:0006610
CGI_10022511	-1.18677	1.72388e-07	44.1239	-0.675589	0.0119392	35.7463	-1.1359	1.28996e-07	43.5659	-0.999419	solute carrier family 23 member 1-like	0.7115		GO:0055085;GO:0016021;GO:0005215
CGI_10019337	-0.941059	3.06144e-06	55.7451	-0.683551	0.000392018	51.3019	-1.38209	2.96331e-18	70.3314	-1.00223	cation-transporting ATPase 13A3	0.625		GO:0005488
CGI_10018662	-1.64743	9.25897e-13	37.8077	-0.643488	0.0315464	23.5465	-0.720023	0.0262415	24.2422	-1.00365	hypothetical protein CGI_10018662	0.705		unknown
CGI_10004353	-0.77707	7.08878e-05	33.6804	-0.74632	0.000118362	34.4863	-1.49155	2.96461e-10	50.4279	-1.00498	multiple epidermal growth factor-like domains 10	0.7515		unknown
CGI_10013355	-0.756061	0.0155868	17.4613	-1.54401	2.54481e-10	27.0352	-0.725729	0.00699433	17.3261	-1.0086	hypothetical protein CGI_10013355	0.9433		unknown
CGI_10025962	-0.988711	1.67781e-07	338.082	-1.11402	1.77e-11	371.932	-0.998966	2.99509e-08	345.828	-1.0339	Chitin synthase 6	0.6505		GO:0016758;GO:0008152;GO:0016021
CGI_10011237	-1.15287	1.67117e-11	88.3647	-0.884136	1.25553e-08	80.4063	-1.08202	1.23645e-12	86.4992	-1.03968	multidrug resistance-associated 1-like	0.689		GO:0005524;GO:0042626;GO:0055085;GO:0008152;GO:0016021
CGI_10013967	-1.50063	4.49559e-19	46.1936	-1.09511	1.24196e-09	39.1431	-0.526022	0.030193	29.5231	-1.04059	paramyosin-like isoform X1 [Crassostrea gigas]	0.7485		GO:0008270;GO:0005622
CGI_10008005	-1.19315	6.57508e-05	22.4682	-0.817437	0.0127529	19.2292	-1.13672	0.000531298	22.5125	-1.0491	Leucine-rich repeat-containing 24	0.571		GO:0016021;GO:0008063
CGI_10005719	-1.26953	3.55639e-09	30.6103	-0.517552	0.0406899	22.0521	-1.39841	2.30649e-11	33.3196	-1.06183	39S ribosomal mitochondrial	0.7375		GO:0003735;GO:0005840;GO:0006412
CGI_10018156	-1.17632	1.68541e-06	37.5925	-0.680406	0.00154438	30.2073	-1.32895	1.89531e-11	40.6336	-1.06189	von Willebrand factor type EGF and pentraxin domain-containing 1	0.726		GO:0016021
CGI_10016211	-0.920093	1.63686e-10	123.54	-0.884133	5.97332e-15	125.668	-1.38619	8.52691e-38	157.287	-1.06347	multiple epidermal growth factor-like domains 11	0.791		GO:0016020;GO:0005488;GO:0009987
CGI_10028537	-0.625346	2.27555e-06	77.0927	-1.83081	5.39595e-46	145.893	-0.754145	2.00675e-06	83.2064	-1.0701	resistance to inhibitors of cholinesterase 3-like	0.6486		GO:0016021
CGI_10014344	-1.30341	1.24996e-22	149.961	-1.07963	3.07256e-14	139.906	-0.852786	1.21398e-11	122.926	-1.07861	hypothetical protein CGI_10014344	0.9133		unknown
CGI_10020962	-0.770191	0.0459591	10.5756	-1.17654	0.000289006	13.4266	-1.28972	0.000436944	14.5742	-1.07882	calpain-2 catalytic subunit-like	0.6235		GO:0006508;GO:0004198;GO:0005622
CGI_10015341	-0.843493	0.00815366	14.9635	-0.811402	0.00700065	15.1714	-1.58254	4.1142e-06	24.0212	-1.07915	Alpha-2A adrenergic partial	0.554		GO:0004930;GO:0007186;GO:0016021
CGI_10015609	-0.897311	5.03369e-06	461.866	-1.35615	4.57643e-16	600.057	-0.991426	2.71501e-10	488.996	-1.08163	c-binding -like	0.548		GO:0005509;GO:0030246
CGI_10021923	-1.04623	0.0001388	18.3106	-0.979435	0.000412454	18.3467	-1.22952	3.27489e-06	20.6197	-1.08506	helicase ARIP4-like isoform X1 [Oreochromis niloticus]	0.717		GO:0008152;GO:0004386
CGI_10019678	-0.712395	4.02453e-08	205.857	-1.38727	9.71193e-24	296.523	-1.17331	4.69909e-20	260.521	-1.09099	THAP domain-containing 2-like isoform X1 [Acyrthosiphon pisum]	0.6995		GO:0003676
CGI_10013842	-0.694845	0.000964947	43.5827	-0.927791	2.37299e-05	50.7041	-1.65646	4.99261e-31	70.8694	-1.09303	hypothetical protein CGI_10013842	0.5486		unknown
CGI_10022202	-0.954699	1.09634e-09	65.7072	-0.789003	6.69108e-06	63.4892	-1.53761	1.0517e-23	90.103	-1.09377	DNA polymerase III polC-type	0.6625		GO:0003676
CGI_10002374	-1.25148	9.48516e-16	88.3109	-1.20315	2.20631e-16	89.3475	-0.83312	2.65411e-08	73.4959	-1.09591	peroxisomal NADH pyrophosphatase NUDT12 isoform X3 [Monodelphis domestica]	0.72		GO:0046872;GO:0016272;GO:0008152;GO:0006457;GO:0016787
CGI_10026616	-1.02349	0.0253154	4.21459	-1.25847	0.00361766	4.92829	-1.03845	0.0242376	4.31113	-1.1068	cell wall DAN4-like	0.6213		GO:0016021
CGI_10009465	-0.775962	0.000728955	24.9815	-1.38647	1.07984e-12	34.9197	-1.1692	5.11599e-08	30.7478	-1.11054	cholecystokinin receptor-like [Crassostrea gigas]	0.652		GO:0004930;GO:0007186;GO:0016021
CGI_10005476	-1.33777	9.29374e-12	48.9073	-1.25393	1.69759e-11	48.4674	-0.750299	0.000165899	37.2518	-1.114	protein-lysine methyltransferase METTL21D	0.7375		GO:0016426;GO:0008171;GO:0016427;GO:0016273;GO:0008169;GO:0018023;GO:0016279;GO:0016433;GO:0016423;GO:0016434
CGI_10022688	-1.05931	7.57056e-10	166.997	-0.951893	6.14665e-08	164.641	-1.33143	7.62858e-17	194.585	-1.11421	protocadherin Fat 4-like	0.6255		GO:0005509;GO:0016021;GO:0007156
CGI_10014174	-0.382226	0.0280291	165.916	-1.22494	3.56425e-18	252.567	-1.7389	1.19756e-34	324.877	-1.11535	cytochrome P450 family partial	0.7705		GO:0005506;GO:0016705;GO:0016021;GO:0055114;GO:0004497;GO:0020037
CGI_10004709	-0.534057	0.0212574	332.671	-1.78064	1.53528e-55	629.049	-1.03475	1.8646e-10	423.701	-1.11648	hypothetical protein CGI_10004709	0.655		unknown
CGI_10004406	-1.45374	6.86211e-09	50.8985	-0.768034	0.000450662	36.5135	-1.12984	1.72584e-09	42.3905	-1.11721	calpain-5- partial	0.613		GO:0051493;GO:0006508;GO:0004198;GO:0005622
CGI_10020648	-1.2762	4.2113e-05	87.968	-1.26954	9.41433e-07	88.1622	-0.806935	0.000278642	67.4431	-1.11756	hypothetical protein CGI_10020648	0.8317		unknown
CGI_10009694	-0.781071	0.0310696	26.2248	-1.17481	0.000722591	33.8318	-1.39935	4.07667e-07	36.2866	-1.11841	Disrupted in renal carcinoma 2	0.6585		GO:0016021
CGI_10016827	-1.54291	4.46115e-06	12.9539	-0.831973	0.0291419	8.86783	-0.98038	0.00732512	9.40807	-1.11842	hypothetical protein CGI_10016827	0.7905		unknown
CGI_10016973	-1.15365	2.29872e-05	17.3695	-1.09519	3.77873e-05	17.3744	-1.11899	3.73274e-05	17.3929	-1.12261	mucin-2-like isoform X1	0.97		GO:0016021
CGI_10021418	-1.51939	2.36276e-13	393.587	-1.30817	2.06051e-13	360.901	-0.541653	0.00133348	245.507	-1.12307	bactericidal permeability increasing	0.517		GO:0008289
CGI_10001288	-1.6107	4.38522e-19	43.8932	-0.769249	0.000996926	29.8886	-0.991577	3.99794e-05	32.844	-1.12384	enzymatic poly	0.632		unknown
CGI_10006972	-0.873356	0.0204699	9.31212	-1.61562	1.44992e-07	14.4978	-0.885628	0.0223758	9.64454	-1.12487	leucine-rich repeat-containing partial	0.815		unknown
CGI_10000520	-1.12422	4.74728e-08	134.564	-1.38471	2.12207e-17	158.04	-0.894825	7.99414e-09	121.346	-1.13459	hypothetical protein CGI_10000520	0.8867		unknown
CGI_10027792	-1.31144	2.42809e-05	20.3246	-1.3004	1.13754e-06	20.3087	-0.811233	0.0120691	15.749	-1.14102	Prostaglandin E2 receptor EP4 subtype	0.737		GO:0004930;GO:0007186;GO:0016021
CGI_10003717	-0.750351	0.0133688	13.7788	-1.43158	1.52692e-08	20.301	-1.24373	1.95139e-06	17.9851	-1.14189	Amiloride-sensitive cation channel 4	0.584		GO:0005272;GO:0016021;GO:0035725
CGI_10015658	-1.06899	0.0209024	3.78179	-1.17828	0.0101113	4.19353	-1.18027	0.0109205	4.12432	-1.14251	L-ascorbate oxidase	0.6255		GO:0005507;GO:0016491;GO:0016021;GO:0055114
CGI_10002626	-0.797994	1.17766e-06	66.3111	-1.24854	7.98623e-15	85.6912	-1.38776	3.23747e-18	90.27	-1.14477	gamma-glutamyltranspeptidase 1-like isoform X2	0.7395		GO:0006749;GO:0016021;GO:0003840
CGI_10007777	-1.2683	0.000300618	12.3598	-0.865061	0.0339854	10.3801	-1.30315	0.000248174	12.8307	-1.1455	Multiple epidermal growth factor-like domains 10	0.65		unknown
CGI_10020799	-0.926919	0.0206622	253.503	-1.64107	1.26516e-09	367.633	-0.872789	0.0261361	246.91	-1.14693	Beta-1,4-N-acetylgalactosaminyltransferase bre-4	0.74		GO:0005975;GO:0016757;GO:0016020
CGI_10001256	-1.109	0.00252601	19.9548	-0.731335	0.0252693	16.2664	-1.60292	0.00135852	53.4284	-1.14775	myticusin-alpha precursor	0.6871		unknown
CGI_10001300	-1.00991	1.83932e-06	27.9463	-1.5652	9.93365e-16	38.6657	-0.868788	0.000134763	26.6126	-1.14796	A-kinase anchor 9	0.864		GO:0008270;GO:0016310;GO:0016301;GO:0005622
CGI_10021298	-1.22266	2.00043e-11	67.5622	-0.979822	6.95428e-06	62.6546	-1.25875	2.82411e-10	70.5108	-1.15374	Dehydrogenase reductase SDR family member 11	0.9215		GO:0016491;GO:0055114
CGI_10013453	-0.894523	0.0487259	7.33856	-1.32342	0.00115993	9.66295	-1.24519	0.00664388	9.87819	-1.15438	Gamma-aminobutyric acid receptor subunit gamma-2	0.679		GO:0034220;GO:0016021;GO:0005230
CGI_10017427	-1.32827	0.00754395	2.31229	-1.07896	0.0422916	2.25866	-1.06472	0.0454437	1.85197	-1.15732	A-kinase anchor 9	0.7405		GO:0008270;GO:0016310;GO:0016301;GO:0005622
CGI_10025577	-0.81134	4.57578e-09	76.9646	-1.33005	1.03497e-21	103.07	-1.35175	5.17137e-12	103.845	-1.16438	calponin homology domain-containing DDB_G0272472-like	0.814		GO:0008270;GO:0005622
CGI_10005702	-0.974257	4.59911e-09	132.264	-1.66541	5.11465e-43	193.453	-0.869058	3.00241e-10	127.659	-1.16958	Alkaline tissue-nonspecific isozyme [Crassostrea gigas]	0.7005		GO:0016311;GO:0004035
CGI_10007723	-1.23125	2.85214e-05	19.4489	-1.62041	1.26772e-11	24.421	-0.664926	0.0397236	14.7555	-1.1722	mothers against decapentaplegic homolog 6-like	0.799		GO:0005634;GO:0005667;GO:0003677;GO:0003700;GO:0005737;GO:0006351;GO:0007179;GO:0006355
CGI_10005190	-1.09564	0.00120902	18.5229	-1.61586	1.52272e-08	25.1697	-0.86403	0.0429561	17.193	-1.19184	muscle M-line assembly unc-89-like	0.6295		unknown
CGI_10028562	-1.04164	0.00378771	7.90084	-1.25098	0.000562934	9.36538	-1.28502	0.000420693	9.3186	-1.19254	hypothetical protein CGI_10028562	0.945		unknown
CGI_10021716	-1.05457	7.05327e-13	858.07	-0.975054	1.30528e-31	852.247	-1.56674	1.20883e-114	1117.58	-1.19879	hypothetical protein CGI_10021716	0.8083		unknown
CGI_10013212	-1.29948	0.00455691	9.09401	-1.33531	0.00189679	8.87213	-0.983566	0.0251375	6.77993	-1.20612	PREDICTED: uncharacterized protein LOC105317746 [Crassostrea gigas]	1		GO:0016021
CGI_10019348	-1.16217	0.00472177	5.93948	-1.32928	0.00098255	6.73507	-1.14758	0.0105729	6.17978	-1.21301	P2X purinoceptor 7-like	0.537		unknown
CGI_10007974	-0.986083	3.51415e-08	61.0226	-1.84528	7.234e-34	98.8574	-0.814036	7.14143e-05	57.526	-1.21513	endoplasmic reticulum aminopeptidase 1 isoform X3 [Tribolium castaneum]	0.6475		GO:0008270;GO:0006508;GO:0004177;GO:0008237
CGI_10003647	-1.17213	5.02995e-06	53.0585	-1.88522	3.56028e-15	82.1117	-0.597995	0.0090797	40.4051	-1.21845	partial [Nematostella vectensis]	0.678		GO:0005509;GO:0016021;GO:0005578
CGI_10014972	-1.3923	4.72543e-08	137.111	-0.964053	6.85629e-06	111.689	-1.3237	8.1157e-13	130.594	-1.22669	hypothetical protein CGI_10014972	0.5915		unknown
CGI_10017951	-0.897365	0.000560442	26.3557	-1.68067	3.05802e-12	41.5172	-1.10351	6.51968e-07	29.4607	-1.22718	Prostaglandin E2 receptor EP4 subtype	0.6555		GO:0007186;GO:0016021
CGI_10017036	-1.44624	1.76572e-15	296.336	-0.920055	1.5744e-06	236.132	-1.34853	1.23842e-11	288.396	-1.23827	Multiple epidermal growth factor-like domains 10	0.7275		GO:0016021
CGI_10002476	-1.03206	2.02856e-07	181.8	-1.19412	2.9559e-08	206.228	-1.51194	1.37943e-08	246.907	-1.24604	hypothetical protein CGI_10002476	0.83		unknown
CGI_10023577	-1.17934	2.4804e-05	16.0222	-1.64139	3.66474e-11	21.2498	-0.917925	0.00124552	14.1719	-1.24622	cytochrome P450 10-like	0.71		GO:0005506;GO:0016705;GO:0055114;GO:0020037
CGI_10014213	-0.799438	0.0395845	10.9997	-1.34217	1.28465e-05	14.932	-1.60841	8.03902e-07	17.6452	-1.25	hypothetical protein CGI_10014213	0.6367		unknown
CGI_10001547	-0.972279	0.0486709	3.40521	-1.41889	0.00311658	5.16707	-1.38729	0.00217684	4.43647	-1.25948	serine arginine repetitive matrix 1-like	0.659		GO:0016021
CGI_10011795	-1.09454	1.85312e-06	24.3897	-1.49511	2.81281e-12	31.2119	-1.19667	6.19182e-07	26.2524	-1.26211	PREDICTED: uncharacterized protein LOC105334440 isoform X1 [Crassostrea gigas]	0.9675		GO:0016021
CGI_10009631	-1.14553	0.000378916	17.0383	-1.17184	0.000103874	17.7165	-1.48196	2.10294e-06	21.0975	-1.26645	UPF0489 C5orf22 homolog	0.4675		GO:0016021
CGI_10011336	-1.80474	9.06592e-76	392.141	-0.571249	3.63331e-05	224.169	-1.43628	4.09462e-25	331.588	-1.27076	beta-1,3-galactosyl-O-glycosyl-glyco beta-1,6-N-acetylglucosaminyltransferase-like	0.7425		GO:0008375;GO:0016020;GO:0008152
CGI_10018745	-1.23426	0.0106015	3.15934	-1.36765	0.00434865	3.49314	-1.21883	0.0127272	3.06022	-1.27358	Arrestin domain-containing 2	0.6525		unknown
CGI_10017953	-0.985135	0.0348374	3.87051	-0.977676	0.047645	4.09609	-1.86087	6.49599e-06	7.12741	-1.27456	Prostaglandin E2 receptor EP4 subtype	0.6365		GO:0007186;GO:0016021
CGI_10025467	-1.62911	4.91198e-05	6.62658	-1.20389	0.0055144	5.04842	-1.0019	0.0315398	4.47123	-1.2783	multiple epidermal growth factor-like domains 6 isoform X1 [Crassostrea gigas]	0.82		GO:0016020;GO:0034773;GO:0042799
CGI_10013000	-0.854365	7.49806e-09	77.6282	-1.36742	1.10869e-28	103.111	-1.62605	9.52098e-41	115.872	-1.28261	deoxyribonuclease-1-like [Lingula anatina]	0.6725		GO:0006308;GO:0004536
CGI_10013858	-2.09522	1.03054e-18	132.104	-0.733068	0.0130035	65.1794	-1.02125	4.81886e-09	71.6789	-1.28318	short-chain collagen C4-like	0.822		unknown
CGI_10002731	-1.6865	4.00754e-21	53.0422	-1.55027	2.45208e-16	51.1022	-0.62093	0.00869836	31.6176	-1.2859	Methionyl-tRNA mitochondrial	0.736		GO:0005524;GO:0004825;GO:0005737;GO:0006431
CGI_10001212	-0.940671	6.23932e-05	62.7738	-1.45376	1.37978e-16	83.7006	-1.48481	8.36688e-24	82.7702	-1.29308	hypothetical protein CGI_10001212	0.7675		GO:0016021
CGI_10016359	-1.31626	2.99793e-16	289.832	-0.882327	1.53015e-15	241.684	-1.7176	2.69775e-48	361.03	-1.30539	hypothetical protein CGI_10016359	0.7045		unknown
CGI_10024558	-0.737924	0.0130428	27.289	-2.14893	2.58028e-30	58.8008	-1.04198	0.00124615	32.97	-1.30961	BTB and MATH domain-containing 38-like	0.7375		GO:0004725;GO:0016021;GO:0035335
CGI_10001117	-1.24252	0.00446458	15.3551	-1.73808	8.24346e-07	19.5862	-0.95179	0.010018	11.7207	-1.3108	Flavin-containing monooxygenase FMO GS-OX-like 3	0.7325		GO:0050661;GO:0050660;GO:0055114;GO:0004499
CGI_10009672	-0.585214	0.00439296	115.741	-2.41081	4.54661e-64	312.318	-0.973323	4.87324e-07	140.974	-1.32312	2 -deoxynucleoside 5 -phosphate N-hydrolase 1	0.701		GO:0005634;GO:0050144;GO:0030307;GO:0042803;GO:0070694;GO:0005737;GO:0009116;GO:0009159;GO:0019104;GO:0009117
CGI_10027398	-1.21361	0.00587428	16.0832	-1.41742	6.21906e-05	16.8728	-1.34128	2.6443e-05	15.2924	-1.3241	hypothetical protein CGI_10027398	1		unknown
CGI_10024130	-1.31779	0.00134665	8.92305	-1.08878	0.0103574	7.83167	-1.58408	2.46374e-05	10.2966	-1.33022	Tyrosine- kinase transforming Fps	0.84		unknown
CGI_10013496	-0.843811	0.00398502	19.9348	-1.43906	3.80742e-07	28.6324	-1.71242	2.37333e-14	31.834	-1.33176	39S ribosomal mitochondrial	0.5595		GO:0003735;GO:0015934;GO:0006412
CGI_10014250	-2.21132	7.21377e-144	461.754	-0.425182	0.00544992	198.025	-1.36926	8.56236e-64	297.934	-1.33525	cytochrome P450 3A9-like	0.612		GO:0005506;GO:0016705;GO:0055114;GO:0004497;GO:0020037
CGI_10023838	-1.55194	9.47588e-42	304.408	-1.20619	5.96365e-16	267.034	-1.2517	3.70778e-24	266.353	-1.33661	hypothetical protein CGI_10023838	1		unknown
CGI_10020651	-1.56753	2.2928e-09	86.6907	-0.815439	0.00116273	59.5233	-1.65361	2.98281e-12	91.2244	-1.34553	Vesicular glutamate transporter 3	0.8317		GO:0016021
CGI_10014266	-2.20985	9.93201e-17	110.094	-0.957154	4.03454e-05	53.7568	-0.895974	0.00048504	51.5184	-1.35433	tryptophan--tRNA mitochondrial	0.852		GO:0005524;GO:0005739;GO:0001570;GO:0006436;GO:0004830
CGI_10001440	-1.34777	6.98111e-34	138.087	-1.46862	1.00741e-27	153.461	-1.25788	3.77867e-17	135.645	-1.35809	Threonine synthase-like 1	0.7605		GO:0005737;GO:0043231;GO:0016021;GO:0006520
CGI_10000128	-1.37249	2.6962e-07	36.7015	-1.91093	1.90232e-13	52.1496	-0.804144	0.00615616	27.6758	-1.36252	leucyl-cystinyl aminopeptidase-like [Crassostrea gigas]	0.7025		GO:0070011;GO:0006508
CGI_10005232	-1.91446	2.88357e-18	30.0343	-1.36255	7.19803e-08	22.9895	-0.863654	0.0257026	18.2154	-1.38022	trihelix transcription factor GT-3a- partial	0.7045		unknown
CGI_10014086	-0.894572	0.000234603	23.9044	-1.45742	1.06759e-10	33.0954	-1.79933	7.99094e-18	39.2782	-1.38377	Acid trehalase 1	0.6545		GO:0003824;GO:0016020;GO:0008152
CGI_10011833	-1.2393	1.09687e-20	91.1097	-1.65736	3.33787e-38	117.669	-1.26487	2.15865e-20	93.9907	-1.38718	SSUH2 homolog	0.7065		GO:0005634;GO:0006355;GO:0043565
CGI_10003098	-1.23905	4.59943e-07	29.0907	-1.84455	2.94611e-18	41.7561	-1.09584	1.79814e-06	27.2345	-1.39315	hypothetical protein CGI_10003098	0.696		GO:0016021
CGI_10027240	-1.6379	0.000276338	4.2653	-1.10192	0.0274412	2.87679	-1.44778	0.00333726	4.26531	-1.39587	acid-sensing ion channel 1-like	0.5355		GO:0005272;GO:0016021;GO:0035725
CGI_10016132	-1.43927	0.000167993	12.4575	-1.56736	5.35544e-06	13.2957	-1.19534	0.000437166	10.2151	-1.40066	fascin-like [Crassostrea gigas]	0.5905		GO:0051015;GO:0005856;GO:0005737;GO:0007015;GO:0030674
CGI_10027990	-1.07041	2.42497e-07	41.2743	-1.98037	1.36468e-20	71.1017	-1.15158	2.19204e-06	44.2775	-1.40079	transcription factor PML	0.68		GO:0003676
CGI_10013305	-1.45239	2.5465e-17	320.156	-1.6622	2.27558e-18	375.327	-1.14819	2.59066e-12	277.967	-1.42093	cephalotoxin [Crassostrea gigas]	0.5585		unknown
CGI_10025414	-1.26157	0.0121551	1.60445	-1.19657	0.0223675	1.43052	-1.80917	0.000243832	2.69932	-1.42244	ankyrin repeat domain-containing 13C-like	0.8125		unknown
CGI_10010589	-1.4992	1.04786e-19	177.075	-1.7244	1.73073e-44	204.991	-1.051	2.30103e-09	143.66	-1.42487	Carcinoembryonic antigen-related cell adhesion molecule 5	0.6855		unknown
CGI_10006049	-1.9645	2.87346e-12	31.5463	-1.16037	0.000212488	20.3148	-1.16871	0.00011994	19.9662	-1.4312	glioma pathogenesis-related 1	0.6205		GO:0005576
CGI_10010772	-1.701	9.09954e-28	75.3671	-0.750284	7.50501e-05	48.6276	-1.91134	1.77188e-27	87.2869	-1.45421	hypothetical protein CGI_10010772	0.6575		unknown
CGI_10002142	-1.65621	1.97423e-28	165.2	-1.95998	2.08815e-16	213.599	-0.752806	1.19584e-05	107.112	-1.45633	Arylacetamide deacetylase	0.818		GO:0003676;GO:0055085;GO:0008152;GO:0016021;GO:0016787
CGI_10009755	-1.90696	6.08146e-27	60.142	-0.745921	0.00153424	34.5656	-1.7405	5.17232e-20	55.9677	-1.46446	neuroglian-like isoform X1 [Biomphalaria glabrata]	0.5922		GO:0016021
CGI_10010467	-1.87473	1.76866e-27	235.462	-1.10188	1.48751e-05	165.384	-1.43868	3.46467e-19	187.774	-1.47176	hypothetical protein CGI_10010467	1		unknown
CGI_10003206	-1.50767	5.94493e-07	15.7777	-1.5515	1.79842e-07	16.7184	-1.35694	0.00111004	16.3333	-1.47204	hypothetical protein CGI_10003206	1		unknown
CGI_10010319	-1.03457	0.00950008	7.82945	-1.50949	4.71805e-06	10.2392	-1.88911	1.00791e-09	12.6776	-1.47773	PIF-like [Crassostrea gigas]	0.5105		GO:0008061;GO:0005581;GO:0006030;GO:0016021;GO:0005576
CGI_10016308	-1.40307	6.04251e-07	19.6149	-1.5046	1.14691e-08	21.2932	-1.53026	2.16778e-08	21.311	-1.47931	cholecystokinin receptor type A-like	0.597		GO:0016021
CGI_10015040	-1.97445	2.38128e-08	11.776	-1.54821	3.14912e-05	9.04184	-0.922802	0.0291145	6.13596	-1.48182	hypothetical protein CGI_10015040	1		unknown
CGI_10013476	-1.65866	2.00014e-09	84.8689	-1.00984	6.37683e-07	59.4383	-1.783	5.10179e-16	89.1739	-1.48383	multiple epidermal growth factor-like domains 10 isoform X1 [Crassostrea gigas]	0.7655		unknown
CGI_10003526	-1.7395	6.65972e-179	603.927	-1.24406	1.90763e-39	488.448	-1.46917	2.9779e-48	537.694	-1.48424	Phosphotidylinositol phosphatase PTPRQ	0.7255		GO:0003676;GO:0008270
CGI_10022764	-1.20879	0.00175248	8.59919	-1.42725	4.81302e-05	9.89578	-1.8803	1.0331e-07	13.3468	-1.50545	phosphatidylinositol 3,4,5-trisphosphate 3-phosphatase TPTE2-like	0.6305		GO:0016021;GO:0016791;GO:0016311;GO:0006810
CGI_10002494	-1.34797	2.38526e-15	177.958	-2.33109	1.30075e-39	324.279	-0.837634	4.99056e-06	141.097	-1.50556	multiple epidermal growth factor-like domains 6	0.639		GO:0004725;GO:0035335
CGI_10018399	-1.84574	3.79517e-26	62.2383	-1.58515	1.36415e-16	56.1909	-1.09113	2.67914e-08	42.5674	-1.50734	hypothetical protein CGI_10018399	0.88		unknown
CGI_10022221	-1.34681	0.00508921	1.17209	-1.42105	0.00437388	1.24511	-1.75594	0.000376518	2.08697	-1.50793	hypothetical protein CGI_10022221	0.99		GO:0016021
CGI_10018536	-1.2939	4.85242e-09	33.2834	-1.42367	5.44719e-11	36.9855	-1.82993	2.236e-15	46.349	-1.51583	Arrestin domain-containing 2	0.8125		GO:0016020
CGI_10016625	-1.33476	6.92021e-07	20.4071	-1.52563	7.55299e-08	23.7976	-1.70598	2.23817e-11	25.5576	-1.52212	leucine-rich repeat-containing 74A isoform X2	0.5595		GO:0008063
CGI_10024895	-1.2422	7.23403e-10	167.648	-1.5692	2.24009e-19	205.313	-1.79786	1.07838e-19	231.466	-1.53642	neuronal acetylcholine receptor subunit alpha-3-like	0.747		GO:0034220;GO:0016021;GO:0005230
CGI_10017369	-2.34495	6.28125e-22	53.976	-0.671284	0.0432332	22.0346	-1.63384	5.01115e-10	35.7861	-1.55002	hypothetical protein CGI_10017369	1		unknown
CGI_10013903	-1.95952	3.22088e-42	127.515	-0.908925	1.45168e-05	77.5084	-1.79417	1.5464e-37	118.164	-1.5542	hypothetical protein CGI_10013903	0.7545		unknown
CGI_10023917	-1.92898	2.06784e-19	40.7068	-1.76259	1.89478e-15	38.2965	-0.972336	7.52522e-05	24.6403	-1.55464	proteoglycan 4-like [Crassostrea gigas]	0.6707		unknown
CGI_10020879	-1.47029	3.38474e-07	413.147	-0.927392	0.000303119	312.503	-2.27144	3.56578e-21	660.316	-1.55637	baculoviral IAP repeat-containing 2-like [Lingula anatina]	0.536		GO:0008270;GO:0043066;GO:0042981
CGI_10009866	-1.40384	0.00039806	12.859	-2.0156	3.08528e-10	17.9729	-1.26252	0.00162243	11.7751	-1.56066	prion-like-(Q N-rich) domain-bearing 25	0.661		unknown
CGI_10025426	-1.25486	4.63823e-10	37.8502	-2.23453	1.93408e-30	68.4889	-1.21054	4.53598e-08	37.8524	-1.56664	G- coupled receptor GRL101-like	0.6405		GO:0007186;GO:0016021;GO:0016500;GO:0008063
CGI_10007883	-1.25588	3.10715e-07	24.9222	-2.44821	1.06666e-36	50.7903	-1.00251	0.000228318	22.3842	-1.56887	hypothetical protein CGI_10007883	0.5806		GO:0046872;GO:0016020
CGI_10005433	-1.67828	3.24755e-20	101.57	-1.84274	3.26444e-24	115.53	-1.20182	3.48176e-07	81.2955	-1.57428	Collagen alpha-5(VI) chain	0.8633		GO:0006869;GO:0005581;GO:0005509;GO:0008289;GO:0042157;GO:0005576
CGI_10002672	-2.77773	6.904e-46	51.8153	-1.06581	0.000202024	20.4293	-0.896943	0.00110308	18.2508	-1.58016	Fucolectin- partial	0.867		GO:0005509;GO:0016021
CGI_10022842	-1.56247	1.08139e-13	407.792	-1.43865	8.413e-11	397.038	-1.80326	7.60398e-26	466.925	-1.60146	AAEL009543- partial [Aedes aegypti]	0.5185		GO:0008061;GO:0006030;GO:0005576
CGI_10024056	-1.40693	6.40149e-06	20.752	-1.9131	1.85131e-14	27.6554	-1.49803	1.43768e-07	21.6843	-1.60602	Arginine kinase	0.8065		GO:0005524;GO:0004054;GO:0016310
CGI_10003351	-2.1135	2.74294e-19	41.1378	-1.85264	1.97935e-17	35.8834	-0.930587	0.000281252	21.5072	-1.63224	Caspase-10	0.7465		GO:0003899;GO:0006351;GO:0006508;GO:0006915;GO:0004197;GO:0046983
CGI_10025249	-1.66005	8.84726e-05	5.27032	-1.23926	0.00717961	3.99168	-2.01415	5.59962e-07	6.67484	-1.63782	hypothetical protein CGI_10025249	1		unknown
CGI_10028160	-0.818548	0.000635974	47.2539	-1.63763	5.8837e-25	73.2183	-2.47547	2.19741e-41	119.101	-1.64388	hypothetical protein CGI_10028160	0.6805		unknown
CGI_10010662	-1.1684	0.0136381	1.11839	-0.957621	0.0474096	0.803623	-2.85611	8.09823e-10	5.16533	-1.66071	hypothetical protein CGI_10010662	0.748		unknown
CGI_10010320	-0.960382	0.00646082	10.2936	-1.90322	4.0432e-11	18.0766	-2.14432	2.39344e-15	20.4133	-1.66931	multiple epidermal growth factor-like domains 10	0.6575		GO:0016021;GO:0016787
CGI_10004144	-2.97691	7.02974e-65	191.246	-1.0862	2.42245e-08	66.3818	-0.956597	0.000116475	61.8222	-1.67324	multiple epidermal growth factor-like domains 10	0.564		GO:0016311
CGI_10013241	-1.19514	0.0158618	4.14091	-1.15509	0.0170867	3.60962	-2.67349	2.32902e-11	11.1248	-1.67458	failed axon connections homolog	0.721		GO:0016020
CGI_10026743	-2.00817	4.64614e-22	50.829	-1.03264	3.15452e-05	30.8996	-1.99247	1.37383e-25	50.6267	-1.67776	TBC1 domain family member 13	0.7765		GO:0031338;GO:0090630;GO:0005096;GO:0016021;GO:0012505;GO:0006886;GO:0017137;GO:0005622
CGI_10012516	-2.59519	8.09688e-40	187.746	-0.650203	0.00094454	66.225	-1.80834	3.25425e-20	117.999	-1.68458	toll-like receptor 4	0.6515		GO:0008063
CGI_10017753	-1.31916	0.00455119	4.45774	-1.22	0.0128841	4.35489	-2.56002	1.85236e-11	10.0795	-1.69973	Actin [Crassostrea gigas]	0.9235		GO:0005524;GO:0005856;GO:0005737
CGI_10008476	-1.2822	0.00141543	12.0571	-1.82024	6.77035e-08	16.5323	-1.9985	3.25174e-12	17.0386	-1.70031	3 beta-hydroxysteroid dehydrogenase Delta 5--	0.617		GO:0003854;GO:0055114;GO:0006694;GO:0016853
CGI_10021285	-1.11514	0.0296856	1.94393	-2.03066	1.64346e-05	4.14239	-1.95783	3.3359e-05	3.74682	-1.70121	BEN domain-containing 3	0.675		unknown
CGI_10008955	-1.66471	0.000268531	4.61273	-1.79246	9.87255e-05	5.1368	-1.64776	0.000472868	4.68672	-1.70164	hypothetical protein CGI_10008955	0.92		GO:0016020
CGI_10002333	-1.24902	0.000651088	8.13516	-1.72065	5.66948e-07	11.2056	-2.14553	7.78309e-12	14.1403	-1.70506	Multiple epidermal growth factor-like domains 10	0.797		GO:0005524;GO:0016020;GO:0004672;GO:0006468
CGI_10004609	-2.18733	3.03638e-35	2131.05	-1.51949	3.44647e-26	1493.26	-1.44667	9.0079e-09	1469.45	-1.71783	bone morphogenetic 15	0.5335		GO:0008083;GO:0005576
CGI_10017206	-1.13343	3.84865e-05	20.4017	-1.89585	1.72043e-15	32.1994	-2.14047	1.2256e-17	37.1043	-1.72325	PREDICTED: uncharacterized protein LOC105322437 [Crassostrea gigas]	0.6425		GO:0016021
CGI_10001192	-1.47426	8.03766e-06	27.4943	-2.44774	4.92384e-27	47.3694	-1.26372	0.000380766	24.9196	-1.72857	Carbonic anhydrase-related	0.8171		GO:0005525;GO:0007264;GO:0016021;GO:0016310;GO:0016301;GO:0005622
CGI_10003724	-1.81756	1.86758e-11	22.5853	-2.19712	7.59238e-11	32.9705	-1.17873	0.000843356	16.5781	-1.73113	hypothetical protein CGI_10003724	0.489		unknown
CGI_10007300	-0.498712	0.0316275	96.4407	-2.74747	9.0694e-24	379.654	-1.96634	2.98205e-08	247.351	-1.73751	Sodium- and chloride-dependent glycine transporter 2	0.8009		unknown
CGI_10021293	-1.14755	0.00288844	8.90304	-1.52374	6.7646e-06	11.2497	-2.55347	9.99627e-20	20.5007	-1.74158	phosphatase mitochondrial	0.9733		GO:0004722;GO:0006470
CGI_10001091	-1.44716	0.000119135	16.6217	-1.79043	1.96706e-10	19.2616	-2.01441	6.01135e-10	23.1475	-1.75067	hypothetical protein CGI_10001091	0.91		unknown
CGI_10021458	-1.83786	8.28429e-16	96.525	-0.729167	0.00160923	55.1137	-2.69045	1.69775e-33	166.771	-1.7525	PDZ and LIM domain 7-like [Crassostrea gigas]	0.6246		GO:0008270;GO:0016021
CGI_10007732	-0.986529	0.00267236	20.1997	-2.78724	1.1892e-43	57.3556	-1.496	1.12382e-09	26.2285	-1.75659	phosphoglucose isomerase	0.7475		GO:0004347;GO:0006094;GO:0006096
CGI_10021583	-1.95365	3.47086e-05	3.96322	-2.01435	3.19853e-05	4.19411	-1.31284	0.0110568	2.24658	-1.76028	hypothetical protein CGI_10021583	0.8209		GO:0046872
CGI_10015206	-2.6402	1.51603e-161	1536.84	-1.64818	6.49466e-40	910.878	-0.995633	1.61086e-13	642.649	-1.76134	1,5-anhydro-D-fructose reductase [Trichinella pseudospiralis]	0.7485		GO:0016491;GO:0055114
CGI_10013406	-2.12424	4.87863e-06	4.6459	-1.9089	8.89205e-05	3.60098	-1.26565	0.0145914	1.78472	-1.76626	hypothetical protein CGI_10013406	1		GO:0016021
CGI_10021502	-1.61935	9.40974e-05	5.8505	-1.86712	2.41232e-06	6.91893	-1.83203	3.56964e-06	6.56153	-1.77283	hypothetical protein CGI_10021502	1		unknown
CGI_10003804	-1.74824	0.000224589	2.6226	-2.04067	1.60969e-05	3.46976	-1.5619	0.00169341	2.23204	-1.7836	Hepatocyte growth factor	0.6805		GO:0008270;GO:0006508;GO:0004222
CGI_10010580	-2.0656	1.6563e-49	1006.67	-1.37659	5.46084e-61	708.952	-1.92132	6.09416e-101	929.839	-1.78784	glucose dehydrogenase [ quinone]-like	0.7335		GO:0016614;GO:0050660;GO:0055114
CGI_10024282	-1.35988	1.30229e-07	60.9341	-2.10718	2.59191e-28	93.9273	-1.92924	4.64505e-24	82.8147	-1.79877	Organic cation transporter	0.664		GO:0055085;GO:0022857;GO:0016021
CGI_10014206	-2.23555	3.00684e-34	66.5107	-0.721155	0.00218734	30.9202	-2.48209	3.94009e-36	79.7504	-1.81293	[Nematostella vectensis]	0.681		GO:0050794;GO:0044424
CGI_10001414	-1.05905	0.0114388	5.77072	-1.78881	1.27654e-06	9.32563	-2.59191	5.53575e-15	15.5865	-1.81325	hypothetical protein CGI_10001414	0.8771		unknown
CGI_10008888	-2.05266	5.11527e-07	7.35	-1.60625	0.000288078	5.44868	-1.7965	3.1473e-05	6.09965	-1.81847	transmembrane matrix receptor MUP-4-like	0.5988		GO:0016020
CGI_10015273	-2.40982	6.85823e-10	10.0095	-0.967369	0.0474621	3.61308	-2.08865	9.82907e-08	7.38441	-1.82194	Hyaluronan mediated motility receptor	0.845		GO:0005540
CGI_10013995	-1.5591	5.60235e-07	39.3587	-1.75487	4.7759e-08	46.5371	-2.15782	4.60273e-15	56.4549	-1.82393	Beta-1,4-N-acetylgalactosaminyltransferase bre-4	0.7705		GO:0005975;GO:0016757;GO:0016021
CGI_10003690	-1.3737	0.00554408	2.42855	-1.44967	0.00403455	2.54399	-2.65741	1.4454e-09	6.85207	-1.82693	Centromere J	0.6329		unknown
CGI_10013787	-2.56341	4.24146e-09	9.36109	-1.14704	0.0265501	2.53014	-1.77456	0.000227635	4.67407	-1.82833	uncharacterized protein LOC105320522	0		unknown
CGI_10026958	-2.00796	2.54175e-05	2.13836	-1.2067	0.014377	1.05509	-2.34725	1.12509e-06	3.73508	-1.85397	hypothetical protein CGI_10026958	1		unknown
CGI_10022843	-2.11551	2.54173e-22	36.5553	-0.921352	0.00033577	19.5904	-2.59377	2.06319e-35	49.5058	-1.87688	amine oxidase [flavin-containing] A-like	0.7425		GO:0016491;GO:0016021;GO:0055114
CGI_10025246	-2.124	1.08508e-11	23.2955	-1.86201	1.0194e-10	19.4065	-1.65725	2.88413e-07	17.302	-1.88109	hypothetical protein CGI_10025246	0.7275		unknown
CGI_10008367	-1.65808	4.00237e-08	18.2947	-2.38642	3.42923e-23	28.3012	-1.61475	3.86567e-08	17.889	-1.88642	ankyrin-1-like isoform X1	0.7935		unknown
CGI_10007395	-2.52799	4.68736e-09	7.12716	-1.46192	0.00324581	2.82985	-1.67749	0.000570362	3.59815	-1.88913	GTPase IMAP family member 4-like	0.8082		GO:0046872
CGI_10006454	-2.35107	8.73612e-22	479.48	-2.40421	1.26886e-20	519.727	-0.94116	0.0340735	237.008	-1.89882	cephalotoxin [Crassostrea gigas]	0.574		GO:0003676;GO:0090305;GO:0004527
CGI_10015660	-2.17344	1.05255e-08	12.2325	-2.16535	2.81807e-09	11.6992	-1.37138	0.000749566	6.81076	-1.90339	cell death abnormality 1-like	0.813		GO:0003723;GO:0016021
CGI_10005515	-1.57118	8.3895e-09	16.2084	-2.6646	9.50731e-28	32.5857	-1.49737	5.37266e-08	15.6957	-1.91105	Dynein heavy chain axonemal	0.6557		unknown
CGI_10009954	-1.08428	0.0102415	9.18547	-1.78912	2.78503e-06	14.786	-2.86032	7.47042e-25	26.0359	-1.91124	cysteine-rich venom -like	0.7375		GO:0005576
CGI_10003691	-2.2148	1.09571e-20	337.241	-2.00659	2.03632e-21	300.254	-1.51907	1.15275e-05	244.632	-1.91349	[Nematostella vectensis]	0.6535		GO:0016020;GO:0008237
CGI_10014731	-2.41085	1.95414e-07	4.62788	-1.23615	0.0162866	1.24447	-2.1358	9.84589e-06	2.86815	-1.9276	hypothetical protein CGI_10014731	0.6667		unknown
CGI_10019087	-2.01244	4.95806e-38	122.224	-2.33453	1.57153e-50	153.568	-1.43913	1.02093e-20	90.5153	-1.9287	serine threonine- kinase B-raf-like	0.7905		GO:0018108;GO:0042802;GO:0005057;GO:0004674;GO:0090150;GO:0005886;GO:0009887;GO:0030217;GO:0005524;GO:0000165;GO:0004713;GO:0071277;GO:0043231;GO:0005509;GO:0010628;GO:0043066;GO:0051130;GO:0070374;GO:0005829;GO:0031267;GO:0010720;GO:0010975;GO:0015758;GO:0033138
CGI_10000200	-1.51369	0.000670551	5.93828	-1.16856	0.0103425	4.41514	-3.17812	8.5948e-20	17.6939	-1.95346	mucin-2-like isoform X7	0.8275		unknown
CGI_10008216	-3.05457	2.23792e-37	41.0936	-1.70647	1.9418e-08	18.6007	-1.16891	0.000245845	13.3973	-1.97665	[Nematostella vectensis]	0.6025		unknown
CGI_10018832	-1.57272	0.00108221	1.67676	-1.02473	0.0363505	0.807775	-3.33712	1.10727e-13	8.14794	-1.97819	Vacuolar sorting-associated 13C	0.762		unknown
CGI_10021348	-2.31345	2.08632e-19	29.6439	-1.27014	4.06699e-05	16.6644	-2.37347	1.63433e-12	35.3428	-1.98569	cAMP-regulated D2 -like	0.5915		GO:0008152;GO:0016787
CGI_10027714	-2.12123	2.12914e-18	45.3067	-1.24819	1.03049e-07	28.0206	-2.60763	9.02785e-28	62.5867	-1.99235	synaptobrevin-A-like isoform X1	0.8186		GO:0016192;GO:0016021
CGI_10012958	-1.93976	2.92374e-05	3.99979	-2.78007	1.42529e-10	7.45172	-1.32018	0.0102158	2.3983	-2.01334	Sarcoplasmic calcium-binding	0.775		unknown
CGI_10019951	-2.16161	1.5609e-24	67.5555	-1.27617	4.58068e-10	42.0178	-2.66357	1.16881e-50	91.502	-2.03378	baculoviral IAP repeat-containing 7-B isoform X3 [Microplitis demolitor]	0.6395		GO:0046872;GO:0043066;GO:0042981
CGI_10013563	-2.78932	2.53619e-11	9.93424	-1.53594	0.00147043	3.32731	-1.81908	6.72972e-05	3.96658	-2.04811	hypothetical protein CGI_10013563	0.7094		unknown
CGI_10000407	-1.60248	0.00010058	12.2235	-1.86423	1.30752e-07	13.3863	-2.71541	1.64201e-18	22.7072	-2.06071	Multiple epidermal growth factor-like domains 10	0.73		GO:0051213;GO:0046872;GO:0044238;GO:0044237;GO:0044710;GO:0071704;GO:0016787
CGI_10025741	-1.67909	0.000498035	1.63315	-2.98844	7.23094e-11	4.77628	-1.51583	0.00228732	1.32467	-2.06112	short-chain collagen C4-like	0.777		GO:0005581
CGI_10011115	-1.45502	5.97527e-09	35.1513	-2.7799	4.15281e-32	82.3176	-1.98493	3.99357e-17	48.5549	-2.07328	---NA---	0		unknown
CGI_10015131	-1.47136	0.00236258	1.19279	-3.77127	3.09997e-17	16.6548	-1.01643	0.0386218	0.7778	-2.08635	hypothetical protein CGI_10015131	0.6385		unknown
CGI_10018635	-1.0188	0.0316275	275.421	-1.70348	5.50731e-05	437.628	-3.66344	6.26055e-67	1176.22	-2.12857	TPR and ankyrin repeat-containing 1- partial	0.709		GO:0007229
CGI_10010946	-1.12476	0.0127556	4.19	-1.67989	0.000109626	6.57434	-3.58739	3.7725e-26	23.8907	-2.13068	PREDICTED: uncharacterized protein LOC105331111 [Crassostrea gigas]	0.5875		GO:0016021
CGI_10007828	-3.23266	2.09725e-66	73.865	-2.09252	3.96949e-16	39.1339	-1.18134	3.416e-05	22.7265	-2.16884	transmembrane GTPase Marf-like	0.726		GO:0000166;GO:0000165;GO:0000186;GO:0004709;GO:0005622
CGI_10017348	-2.82407	1.64954e-10	5.21225	-1.83825	0.000216754	2.34788	-1.84499	0.00018991	2.25299	-2.1691	hypothetical protein CGI_10017348	1		unknown
CGI_10017912	-2.49751	1.10177e-59	117.058	-2.16944	1.42281e-45	99.7089	-1.86766	3.27469e-41	81.589	-2.1782	venom 164-like isoform X5	0.7135		GO:0016021
CGI_10007746	-1.15016	0.0203744	1.25974	-1.90205	0.000117847	2.28044	-3.50091	8.01486e-16	10.4947	-2.18437	hypothetical protein CGI_10007746	1		unknown
CGI_10023837	-1.36038	3.14333e-15	485.683	-2.93209	6.13398e-185	1217.91	-2.27081	1.19092e-87	805.063	-2.18776	transmembrane matrix receptor MUP-4-like	0.7994		GO:0016021
CGI_10014396	-2.53084	3.02668e-21	55.1335	-3.07931	7.26464e-63	73.9559	-1.09895	0.00126857	24.0496	-2.23637	hypothetical protein CGI_10014396	0.97		unknown
CGI_10016260	-2.40169	2.73568e-13	18.8911	-1.38579	0.000128154	9.82228	-2.96132	2.46887e-24	26.1825	-2.2496	IWS1 homolog isoform X3	0.8215		GO:0003899;GO:0006351;GO:0006508;GO:0006915;GO:0004197;GO:0046983
CGI_10017156	-2.15629	1.18859e-07	23.3115	-1.35619	8.66919e-05	11.1751	-3.23838	3.09576e-31	36.7463	-2.25029	SON-like isoform X1 [Crassostrea gigas]	0.6445		GO:0016702;GO:0046872;GO:0055114
CGI_10021151	-2.90492	7.70382e-130	194.837	-2.26424	1.24968e-41	140.371	-1.61023	3.21945e-33	93.5608	-2.25979	hypothetical protein CGI_10021151	1		unknown
CGI_10015107	-2.25335	9.72902e-29	65.037	-2.43108	3.65411e-38	74.3724	-2.11702	2.31962e-28	60.3522	-2.26715	hypothetical protein CGI_10015107	0.99		GO:0016021
CGI_10019675	-2.29798	8.52911e-08	5.21643	-3.09712	2.00494e-14	9.73173	-1.42969	0.0037524	2.65993	-2.27493	THAP domain-containing 11-like	0.62		GO:0003676
CGI_10026139	-2.72728	5.36193e-41	46.3364	-2.51215	5.85727e-35	41.817	-1.678	3.48121e-10	25.8203	-2.30581	[Nematostella vectensis]	0.666		GO:0008270
CGI_10020652	-1.39067	1.69396e-08	123.794	-2.99863	3.78451e-30	362.421	-2.60516	1.39624e-15	304.555	-2.33148	GCN5 family acetyltransferase [Burkholderia stagnalis]	0.651		GO:0008152;GO:0008080
CGI_10003723	-2.62887	1.60358e-30	565.928	-2.47332	2.72142e-21	546.684	-1.91033	1.57343e-14	370.06	-2.33751	F-box only 43	0.6065		GO:0003676;GO:0090502;GO:0016829;GO:0000214;GO:0000379;GO:0000213
CGI_10022870	-2.66926	2.47641e-27	697.276	-2.44831	8.30836e-16	670.543	-1.91317	6.37208e-13	441.166	-2.34358	probable secreted beta-glucosidase adg3 isoform X2	0.6175		unknown
CGI_10020650	-2.71893	1.88466e-17	48.0153	-1.79866	2.73667e-10	24.4887	-2.53116	3.9728e-25	37.0883	-2.34958	Vesicular glutamate transporter 3	0.7375		GO:0016021
CGI_10012763	-3.06596	1.02461e-67	77.9085	-1.87602	7.58092e-21	39.1856	-2.17052	3.70778e-24	46.3743	-2.37084	WD repeat-containing 92	0.5715		unknown
CGI_10017376	-1.13118	0.0246138	1.65801	-4.61831	6.74341e-33	25.9966	-1.48275	0.00350667	1.88321	-2.41075	IMPACT	0.81		unknown
CGI_10002384	-1.48737	1.4251e-05	61.5075	-3.23638	2.48775e-19	244.423	-2.53699	1.99384e-11	145.349	-2.42025	plasminogen-like [Crassostrea gigas]	0.7155		GO:0008233
CGI_10010992	-1.48598	0.00172077	3.70543	-2.18855	2.68856e-07	5.72067	-3.64775	6.63998e-24	16.5472	-2.44076	Atrial natriuretic peptide receptor A	0.701		GO:0003824
CGI_10022510	-1.09244	9.02547e-05	15.2819	-2.87042	4.23786e-28	47.5244	-3.36172	2.30946e-53	61.5454	-2.44152	Protocadherin-like wing polarity stan	0.626		GO:0005509;GO:0016020;GO:0007156
CGI_10005441	-2.73879	1.47808e-10	6.16492	-3.17956	7.83838e-14	9.20566	-1.5736	0.00166734	2.47784	-2.49732	DNA polymerase III polC-type	0.784		unknown
CGI_10028451	-2.83671	1.50176e-10	5.38479	-1.94681	7.94547e-05	2.52401	-2.74001	3.49484e-09	5.80172	-2.50784	placenta-specific gene 8 -like	0.9467		unknown
CGI_10020228	-3.56497	1.613e-36	38.7621	-2.63872	1.62288e-19	20.2399	-1.40873	3.86124e-05	9.21746	-2.53748	blastula protease 10-like isoform X1 [Crassostrea gigas]	0.653		GO:0008270;GO:0006508;GO:0004222
CGI_10008345	-3.44289	1.05983e-17	13.3502	-2.20976	1.09253e-06	4.31045	-1.97934	2.20869e-05	3.61558	-2.544	hypothetical protein CGI_10008345	0.4794		GO:0003676;GO:0008270
CGI_10019577	-3.58457	1.18893e-62	84.6592	-0.924596	0.00302158	17.7039	-3.38516	7.74257e-53	75.3184	-2.63144	serine threonine- phosphatase 6 regulatory ankyrin repeat subunit B-like	0.5345		unknown
CGI_10022180	-1.58787	1.60508e-14	55.3944	-3.50352	1.78355e-114	181.622	-2.93796	7.6464e-74	123.941	-2.67645	hypothetical protein CGI_10022180	1		unknown
CGI_10012399	-3.68336	1.02694e-32	87.9035	-1.24558	0.00516403	18.2903	-3.18931	2.13238e-28	56.4011	-2.70608	calmodulin-like isoform X3	0.6783		unknown
CGI_10008542	-3.84252	1.43971e-61	76.7031	-1.30398	0.000645709	16.6864	-3.00208	8.05678e-37	43.0486	-2.7162	Ankyrin-1	0.506		GO:0016021
CGI_10026498	-2.95622	2.33177e-12	7.61649	-2.61264	3.5785e-09	5.29972	-2.7318	3.17405e-10	5.68409	-2.76689	28S ribosomal mitochondrial	0.7795		GO:0003723;GO:0003735;GO:0005763;GO:0030159
CGI_10006307	-3.21137	5.37693e-28	30.5508	-3.3755	9.30409e-25	38.9929	-1.78939	2.44995e-06	12.7591	-2.79209	Neutral and basic amino acid transport rBAT	0.6965		GO:0005975;GO:0003824;GO:0016021;GO:0043169
CGI_10025464	-2.59908	2.10448e-15	16.3064	-4.52835	3.11473e-56	65.728	-1.26473	0.00208396	6.97915	-2.79739	deoxyribonuclease-2-alpha-like	0.663		GO:0004531;GO:0006259
CGI_10014039	-1.15984	0.0225608	1.37757	-2.68469	3.93245e-09	5.5861	-4.60995	5.34741e-34	23.6719	-2.81816	enhancer of split m7 -like	0.627		GO:0005634;GO:0003677;GO:0005615;GO:0004866;GO:0006351;GO:0006355;GO:0010951;GO:0046983
CGI_10007413	-2.43557	2.52344e-10	13.9903	-1.95862	4.44172e-07	9.42497	-4.08263	1.65535e-29	53.5637	-2.8256	hypothetical protein CGI_10007413	0.945		GO:0008270
CGI_10022480	-2.83397	3.29521e-24	50.9746	-4.12579	2.08072e-42	144.688	-1.56072	8.57564e-05	25.0704	-2.84016	GLIPR1 1	0.64		GO:0007339;GO:0097224;GO:0001669;GO:0005576
CGI_10011469	-2.1973	8.03525e-15	62.8446	-3.30493	6.89292e-30	142.668	-3.09586	1.1711e-27	118.848	-2.86603	Caprin-2 [Crassostrea gigas]	0.6665		unknown
CGI_10019052	-2.96215	4.4282e-11	6.13305	-3.44736	7.16474e-15	7.42305	-2.2616	2.84322e-06	2.5959	-2.89037	hypothetical protein CGI_10019052	0.985		unknown
CGI_10006546	-2.61856	1.50085e-27	33.8944	-3.05914	4.49357e-41	46.195	-3.02298	3.53231e-40	44.3908	-2.90023	calcitonin gene-related peptide type 1 receptor-like	0.636		GO:0016021
CGI_10004532	-3.16544	4.20815e-39	41.4698	-3.04712	7.28166e-35	39.5381	-2.65628	7.42869e-27	29.7222	-2.95628	WD and tetratricopeptide repeats 1-like	0.887		unknown
CGI_10026670	-2.49184	7.22959e-14	14.5436	-1.64337	2.30933e-05	8.71363	-4.92492	8.17724e-54	100.057	-3.02005	glycine-rich cell wall structural 1-like isoform X2	1		unknown
CGI_10025583	-1.17304	0.0212695	1.75572	-3.22427	6.11938e-14	10.2266	-4.7283	4.83535e-37	30.1816	-3.04187	hypothetical protein CGI_10025583	1		unknown
CGI_10002461	-2.81082	2.0084e-10	5.05962	-4.01034	1.59611e-22	13.2763	-2.31588	1.11517e-06	3.33922	-3.04568	zinc finger MYM-type 3-like	0.7633		unknown
CGI_10003066	-1.61168	7.2343e-06	15.7018	-4.06117	1.27903e-71	72.9579	-3.51411	2.55509e-41	51.7801	-3.06232	hypothetical protein CGI_10003066	0.86		unknown
CGI_10024220	-3.89139	2.35858e-37	48.2355	-3.54547	4.02389e-32	36.2058	-1.76848	1.85133e-06	10.8334	-3.06845	phthiocerol synthesis polyketide synthase type I -like	0.729		GO:0016747;GO:0008152;GO:0016021
CGI_10026105	-2.74041	8.41799e-12	11.6066	-4.48719	5.15089e-41	37.4857	-2.38294	9.99982e-09	8.36671	-3.20351	Werner syndrome ATP-dependent helicase-like	0.6445		GO:0003676;GO:0005524;GO:0008152;GO:0004386
CGI_10000588	-3.20893	6.89079e-14	9.96894	-3.16962	1.40384e-13	7.29656	-3.43165	3.69185e-16	9.7121	-3.27007	Eukaryotic translation initiation factor 3 subunit D	0.6795		GO:0003743;GO:0070993;GO:0006413;GO:0005852
CGI_10015453	-3.70944	2.36587e-84	1859.31	-3.7482	1.48715e-81	1982.89	-2.49585	5.65896e-37	852.073	-3.31783	PREDICTED: uncharacterized protein LOC105346605	0.8314		GO:0005509;GO:0016021
CGI_10003280	-4.3588	2.14142e-48	55.288	-0.963185	0.0277143	5.40214	-4.81284	7.77415e-64	74.0912	-3.37827	Lymphoid-specific helicase	0.96		unknown
CGI_10026959	-4.27063	6.26786e-50	49.1053	-4.91789	1.81537e-70	78.6063	-1.25355	0.00201258	6.24708	-3.48069	SSUH2 homolog	0.71		GO:0005634;GO:0006355;GO:0043565
CGI_10023057	-2.53599	4.20745e-09	6.05821	-4.4135	1.18188e-31	26.7825	-3.84042	1.68356e-23	15.6388	-3.59664	multiple epidermal growth factor-like domains 10 isoform X1 [Crassostrea gigas]	0.7		unknown
CGI_10001431	-4.38603	3.71711e-93	139.976	-2.37267	1.16423e-10	46.4793	-4.03992	9.86188e-73	112.133	-3.59954	hypothetical protein CGI_10001431	0.706		unknown
CGI_10004727	-4.56124	2.18588e-29	27.5882	-2.22568	4.95239e-06	2.91687	-4.10844	3.58396e-22	15.7704	-3.63179	von Willebrand factor type EGF and pentraxin domain-containing 1	0.6713		GO:0008270;GO:0016814;GO:0008152
CGI_10006102	-1.46372	0.00222456	2.68986	-5.05051	1.68495e-44	50.806	-4.50365	5.46542e-35	30.47	-3.67263	28S ribosomal mitochondrial	0.5945		unknown
CGI_10020227	-4.71547	5.71938e-36	24.122	-3.49505	1.04931e-14	16.6265	-2.84245	4.07793e-10	5.31947	-3.68433	hypothetical protein CGI_10020227	0.666		unknown
CGI_10022179	-4.3	3.35814e-37	33.676	-3.42511	4.99193e-22	16.1864	-3.3981	5.70878e-22	15.4363	-3.70773	hypothetical protein CGI_10022179	1		unknown
CGI_10006287	-1.4754	6.04082e-05	19.3066	-4.42098	1.08497e-36	197.704	-5.50402	1.20862e-125	273.253	-3.80014	Cytochrome P450 1A1	0.674		GO:0005506;GO:0016705;GO:0055114;GO:0020037
CGI_10000067	-3.68915	2.05039e-19	91.6926	-4.04888	1.60665e-22	125.727	-3.78791	1.07838e-19	99.2827	-3.84198	coactosin [Crassostrea gigas]	0.781		GO:0003779;GO:0005622
CGI_10028423	-4.06906	7.18137e-25	34.6693	-5.0505	1.82148e-46	53.2597	-3.14114	1.53753e-14	12.3594	-4.0869	wnt inhibitory factor 1-like isoform X2	0.8033		unknown
CGI_10023276	-4.33431	3.8092e-28	19.7972	-5.15391	1.08791e-42	33.4912	-3.69465	1.11313e-18	10.0674	-4.39429	Torsin- partial	0.8195		GO:0006072;GO:0009331;GO:0031175;GO:0061077;GO:0052591;GO:0045104;GO:0051082;GO:0007155;GO:0005635;GO:0005788;GO:0005524;GO:0006998;GO:0048489;GO:0072321;GO:0005829;GO:0055114;GO:0008092
CGI_10002996	-5.37767	1.5159e-54	59.2328	-4.78786	6.89778e-36	43.1695	-3.58596	3.7298e-19	13.8747	-4.58383	hypothetical protein CGI_10002996	0.91		unknown
CGI_10024219	-5.6202	2.56679e-82	257.299	-5.71812	9.22002e-105	238.882	-3.23555	4.75724e-18	51.262	-4.85796	phthiocerol synthesis polyketide synthase type I -like	0.5065		GO:0008152;GO:0016740
CGI_10002918	-4.23893	1.88278e-31	53.452	-5.43362	7.67271e-74	94.1395	-5.16872	8.38413e-66	75.9827	-4.94709	hypothetical protein CGI_10002918	0.855		unknown
CGI_10015836	-5.73567	5.05174e-125	229.055	-5.50605	2.39884e-100	206.51	-4.10148	7.88181e-51	73.0308	-5.1144	muscle M-line assembly unc-89-like	0.6365		GO:0008152;GO:0016874
CGI_10019504	-3.80876	2.01219e-21	14.0634	-5.89229	1.61674e-62	69.6684	-5.86465	2.14133e-62	67.7885	-5.18857	prohibitin [Xenopus tropicalis]	0.852		GO:0016020
CGI_10020820	-5.63601	3.56398e-93	132.501	-3.95451	1.48212e-20	97.5213	-6.37351	5.39434e-128	221.647	-5.32134	hypothetical protein CGI_10020820	0.8475		unknown
CGI_10020659	-4.78739	2.81339e-54	155.419	-6.49137	1.02174e-82	788.952	-5.256	3.10119e-54	269.788	-5.51159	CD109 antigen-like	0.7425		GO:0005615;GO:0004866;GO:0016021;GO:0010951
CGI_10022287	-6.46443	2.40868e-75	132.326	-6.39968	8.03849e-69	122.807	-5.19901	7.32938e-40	50.4444	-6.02104	patched domain-containing 3-like	0.6605		GO:0007165;GO:0016021;GO:0008158;GO:0006810;GO:0005215
