# Supplementary material for: Differential basal expression of immune genes confers Crassostrea gigas resistance to Pacific oyster mortality syndrome
Source: BMC Genomics. 2020 Jan 20;21:63. doi: 10.1186/s12864-020-6471-x (PMC6971885; doi:10.1186/s12864-020-6471-x)
Supplement: Supplementary file 4 — Additional file 4. List of DEGs specifics to the RF23 oyster family. This table presents the Log2 fold change of each CGI differentially expressed (significant) only in the the RF23 oyster family compared to the three susceptible families (SF11, SF14 and SF15), the Blast results, the enriched functional categories and details of each comparison (Log2 fold change, p-value, GO categories and number of reads). [file 12864_2020_6471_MOESM4_ESM.xlsx]

## Sheet: Feuil1
N° CGI	Log2_Fold change_RF23 VS SF11	pval_RF23 VS SF11	Reads_RF23 VS SF11	Log2_Fold change_RF23 VS SF14	pval_RF23 VS SF14	Reads_RF23 VS SF14	Log2_Fold change_RF23 VS SF15	pval_RF23 VS SF15	Reads_RF23 VS SF15	Log2_Fold change_Mean	Blast	MeanSimilarity	Enrichment	GO
CGI_10007645	1.02678	3.90339e-06	1651.89	1.28922	6.18845e-13	1629.92	2.39976	2.86071e-51	1355.03	1.57192	Tenascin- partial	0.8165	defense response ; response to stress	GO:0006952
CGI_10013586	0.432339	0.00693561	111.649	1.42502	1.29345e-16	90.9201	2.3984	2.94241e-41	77.3614	1.41859	Toll-like receptor 1	0.737	defense response ; response to stress	GO:0007165;GO:0006952;GO:0008063;GO:0050776
CGI_10000643	1.30084	0.00340193	4.42924	1.41594	0.00150933	4.44173	1.36485	0.00229168	4.39001	1.36055	Ficolin-2	0.7915	defense response ; response to stress	GO:0006952
CGI_10019179	0.941548	0.000169017	38.024	1.58368	2.56147e-11	34.5058	0.96261	2.13221e-05	38.776	1.16261	C-C chemokine receptor type 8-like	0.669	defense response ; response to stress	GO:0043086;GO:0004857;GO:0016021;GO:0006952;GO:0070098;GO:0050776
CGI_10008785	0.459061	0.00589509	77.3596	1.74689	1.18927e-23	59.9279	1.07622	2.13715e-10	67.1019	1.09406	Tripartite motif-containing 3	0.6	defense response ; response to stress	GO:0008270;GO:0006952;GO:0008063;GO:004298GO:0050776
CGI_10021075	0.834203	3.31355e-08	320.967	0.840946	2.58363e-06	332.424	1.28964	7.35278e-15	294.938	0.988264	tyrosinase tyr-3	0.6795	defense response ; response to stress	GO:0016491;GO:0046872;GO:0016021;GO:0055114;GO:0006952;GO:0006954
CGI_10017983	1.08038	1.65945e-09	1549.78	0.724822	0.00175712	1751.83	0.714658	0.00182107	1726.66	0.839954	tyrosinase tyr-3	0.617	defense response ; response to stress	GO:0016491;GO:0046872;GO:0055114;GO:0006952;GO:0006954
CGI_10006490	0.859522	8.33304e-08	72.0424	0.705133	1.70276e-06	78.0454	0.950264	6.30502e-05	71.2847	0.838306	microfibril-associated glyco 4-like	0.852	defense response ; response to stress	GO:0006952
CGI_10011916	0.406449	0.0405992	687.1	1.2366	1.0994e-14	577.552	0.455958	0.0195479	691.569	0.699668	tyrosinase tyr-3	0.678	defense response ; response to stress	GO:0016491;GO:0046872;GO:0008168;GO:0055114;GO:0044238;GO:0071704;GO:0032259;GO:0006952;GO:0006954
CGI_10007793	0.642104	8.12316e-05	966.703	0.821488	3.29124e-05	954.865	0.591804	0.0126301	996.113	0.685132	tyrosinase tyr-3	0.6275	defense response ; response to stress	GO:0004503;GO:0046872;GO:0055114;GO:0006952;GO:0006954
CGI_10028039	0.981506	1.0414e-06	39.1915	0.559532	0.00750002	45.5092	0.486827	0.0242987	45.715	0.675955	Toll-like receptor 1	0.6365	defense response ; response to stress	GO:0007165;GO:0006952;GO:0008063;GO:0050776
CGI_10006228	0.744232	7.2468e-06	57.878	0.741578	4.11659e-05	60.1859	0.37178	0.0312357	65.8712	0.619197	microfibril-associated glyco 4-like	0.775	defense response ; response to stress	GO:0006952
CGI_10028922	0.494618	5.82723e-05	346.45	0.932587	1.67147e-12	320.078	0.304356	0.0177576	375.2	0.577187	Toll-like receptor 13	0.7925	defense response ; response to stress	GO:0007165;GO:0006952;GO:0008063;GO:0050776
CGI_10026230	0.653308	4.83925e-12	1215.41	0.558329	6.75478e-10	1297.95	0.289404	0.00882159	1381.86	0.500347	tyrosinase tyr-3	0.6825	defense response ; response to stress	GO:0004503;GO:0046872;GO:0016021;GO:0055114;GO:0006952;GO:0006954
CGI_10013672	0.377061	0.0176921	214.62	0.488362	0.00454123	215.459	0.459446	0.00173847	213.911	0.441623	myeloid differentiation primary response 88-like [Crassostrea gigas]	0.712	defense response ; response to stress	GO:0007165;GO:0006952;GO:0008063;GO:0050776
CGI_10009318	0.384641	4.59367e-08	1014.53	0.509088	4.83521e-09	1016.65	0.407536	7.07696e-05	1029.06	0.433755	tyrosinase tyr-3	0.5875	defense response ; response to stress	GO:0016491;GO:0046872;GO:0016021;GO:0055114;GO:0006952;GO:0006954
CGI_10014286	0.476798	0.000449835	102.666	0.330845	0.0269521	111.634	0.321811	0.0120553	110.23	0.376484	tyrosinase tyr-3	0.639	defense response ; response to stress	GO:0016491;GO:0046872;GO:0055114;GO:0030246;GO:0006952;GO:0006954
CGI_10021739	0.304519	0.000245192	581.445	0.236886	0.00508101	617.787	0.344248	5.67937e-07	586.54	0.295218	toll-like receptor 4 [Crassostrea gigas]	0.745	defense response ; response to stress	GO:0007165;GO:0016021;GO:0006952;GO:0008063;GO:0050776
CGI_10013539	-0.365129	0.000129396	1122.37	-0.375168	0.00307926	1172.97	-0.331167	7.12263e-05	1131.36	-0.357155	Tolloid 2	0.5985	defense response ; response to stress	GO:0006508;GO:0004252;GO:0006952;GO:0008063;GO:0050776
CGI_10009263	-0.448182	0.0101898	49.993	-0.515367	0.0105135	53.4504	-0.46323	0.0115372	51.4357	-0.475593	Macrophage migration inhibitory factor	0.5665	defense response ; response to stress	GO:0044464;GO:0044763;GO:1902533;GO:0005576;GO:0005102;GO:0002684;GO:0042127;GO:0043227;GO:0051047;GO:0043066;GO:0001934;GO:0001819;GO:0050896;GO:0016853;GO:0006952;GO:0008228
CGI_10013538	-0.415613	8.10609e-05	327.007	-0.593429	3.20789e-06	366.586	-0.477764	7.6574e-08	342.531	-0.495602	tolloid 2	0.615	defense response ; response to stress	GO:0006508;GO:0004252;GO:0006952;GO:0008063;GO:0050776
CGI_10009217	-0.46763	0.0479195	135.684	-0.636888	0.000375819	151.113	-0.52747	0.00603194	141.754	-0.543996	Toll-like receptor 13	0.6325	defense response ; response to stress	GO:0007165;GO:0045087;GO:0016021;GO:0006952;GO:0008063;GO:0050776
CGI_10011911	-0.378635	0.0180296	313.765	-0.700589	0.00118333	377.326	-1.0594	2.28533e-06	443.385	-0.712873	tyrosinase tyr-3	0.639	defense response ; response to stress	GO:0016491;GO:0046872;GO:0055114;GO:0016740;GO:0006952;GO:0006954
CGI_10003302	-0.928305	0.00889169	11.8192	-0.757051	0.0446135	11.236	-0.718657	0.0437733	10.7411	-0.801337	Angiopoietin-related 2	0.7615	defense response ; response to stress	GO:0046872;GO:0006952
CGI_10002099	-1.52193	7.22596e-07	13.464	-0.938256	0.0102468	10.2243	-0.920508	0.0179933	10.1227	-1.1269	Ficolin- partial	0.7955	defense response ; response to stress	GO:0016021;GO:0006952
CGI_10007539	-1.41254	8.60371e-11	51.3211	-1.19845	6.86944e-08	47.654	-1.86611	4.81981e-22	67.373	-1.49237	laccase-like isoform X2	0.665	defense response ; response to stress	GO:0005507;GO:0016491;GO:0055114;GO:0006952;GO:0006954
CGI_10009080	-1.87593	1.10955e-17	92.6921	-1.92282	3.64447e-25	96.7696	-1.03668	0.0138132	68.4989	-1.61181	GDH 6PGL endoplasmic bifunctional	0.567	defense response ; response to stress	GO:0050661;GO:0006098;GO:0017057;GO:0055114;GO:0006006;GO:0004345;GO:0006952
CGI_10027674	-0.187031	0.00376645	694.484	-0.196461	0.0212907	725.241	-0.168933	0.0233624	704.913	-0.184142	TRAF-TNF receptor-associated factor 2 isoform X1 [Struthio camelus australis]	0.6725	defense response ; response to stressprotein modification by small protein conjugation or removal	GO:0008270;GO:0007165;GO:0042981;GO:0043234;GO:1902533;GO:0044425;GO:0044424;GO:0044093;GO:0010604;GO:0001932;GO:0031325;GO:0019899;GO:0016567;GO:0006952;GO:0008063;GO:004298GO:0050776
CGI_10017821	1.88087	4.3752e-10	29.1703	3.29578	7.73231e-25	26.315	0.862257	0.00144814	37.1553	2.01297	Caprin-2 [Crassostrea gigas]	0.6595	defense response to other organism ; response to external stimulus ; defense response ; response to stress	GO:0006952;GO:0042742
CGI_10000950	2.44601	2.71137e-08	6.00044	1.11863	0.0154666	7.96762	2.13948	6.60602e-07	6.42089	1.90137	complement C1q 3	0.7225	defense response to other organism ; response to external stimulus ; defense response ; response to stress	GO:0006952;GO:0042742
CGI_10025601	2.7832	2.59188e-29	1309.97	0.478037	0.0334854	2073.32	2.37868	4.34178e-30	1400.3	1.87997	complement C1q 4	0.609	defense response to other organism ; response to external stimulus ; defense response ; response to stress	GO:0006952;GO:0042742
CGI_10017364	1.34228	1.01175e-07	47.5877	1.07788	2.40194e-08	52.8163	3.05004	9.1749e-32	38.998	1.8234	Complement C1q tumor necrosis factor-related 3	0.828	defense response to other organism ; response to external stimulus ; defense response ; response to stress	GO:0016021;GO:0006952;GO:0042742
CGI_10005220	1.74005	8.50049e-05	194.629	1.82011	6.4367e-05	193.814	1.74645	4.17183e-05	201.243	1.76887	complement C1q tumor necrosis factor-related 3-like	0.5715	defense response to other organism ; response to external stimulus ; defense response ; response to stress	GO:0006952;GO:0042742
CGI_10024522	1.73759	2.76115e-34	735.259	1.6623	0.000251812	603.739	1.72117	2.41946e-14	743.424	1.70702	Caprin-2 [Crassostrea gigas]	0.639	defense response to other organism ; response to external stimulus ; defense response ; response to stress	GO:0006952;GO:0042742
CGI_10000823	1.39791	1.11631e-22	188.607	1.63266	2.03367e-24	187.452	1.69663	2.21552e-22	181.865	1.57573	complement C1q 3	0.7125	defense response to other organism ; response to external stimulus ; defense response ; response to stress	GO:0006952;GO:0042742
CGI_10022709	1.96162	5.79899e-20	59.2969	0.784052	0.0126144	77.0203	1.66529	9.97819e-10	62.558	1.47032	perlucin isoform X1 [Crassostrea gigas]	0.6085	defense response to other organism ; response to external stimulus ; defense response ; response to stress	GO:0016021;GO:0006952;GO:0042742;GO:000222GO:0008228;GO:0050776
CGI_10016349	1.35181	2.08144e-08	149.503	1.57929	5.82749e-09	147.791	1.47099	7.11112e-11	149.62	1.46736	Complement C1q 2	0.79	defense response to other organism ; response to external stimulus ; defense response ; response to stress	GO:0005581;GO:0006952;GO:0042742
CGI_10009046	0.85424	0.000366621	301.78	1.05602	5.58852e-21	302.399	2.19875	2.99449e-55	243.593	1.36967	complement C1q 4	0.624	defense response to other organism ; response to external stimulus ; defense response ; response to stress	GO:0006952;GO:0042742
CGI_10019212	1.4298	1.2428e-16	92.0116	1.19786	6.73426e-12	100.336	1.19088	4.94818e-14	98.9232	1.27285	low affinity immunoglobulin epsilon Fc receptor-like isoform X2	0.807	defense response to other organism ; response to external stimulus ; defense response ; response to stress	GO:0030246;GO:0006952;GO:0042742;GO:000222GO:0008228;GO:0050776
CGI_10011909	1.38842	0.00230583	3.78806	1.36404	0.00269687	3.96884	0.998911	0.038592	4.19604	1.25046	Heavy metal-binding HIP	0.5735	defense response to other organism ; response to external stimulus ; defense response ; response to stress	GO:0006952;GO:0042742
CGI_10027808	1.1703	3.81916e-07	38.7171	1.2564	1.45739e-07	39.455	1.29337	5.54876e-08	38.4684	1.24002	galactose-specific lectin nattectin-like	0.642	defense response to other organism ; response to external stimulus ; defense response ; response to stress	GO:0005634;GO:0003677;GO:0046982;GO:0000786;GO:0006952;GO:0042742;GO:000222GO:0008228;GO:0050776
CGI_10014768	1.1769	2.37338e-13	1163.3	0.925073	5.01232e-10	1283.29	0.480531	0.000267535	1423.45	0.860833	interferon alpha-inducible 27 2B	0.805	defense response to other organism ; response to external stimulus ; defense response ; response to stress	GO:0016021;GO:0006952;GO:0051607;GO:0039528;GO:0098586;GO:0050776
CGI_10006368	0.657073	0.000454827	3293.27	0.500547	0.00575842	3583.73	0.91896	9.26888e-09	3147.45	0.692193	Low affinity immunoglobulin epsilon Fc receptor	0.7075	defense response to other organism ; response to external stimulus ; defense response ; response to stress	GO:0006952;GO:0042742;GO:000222GO:0008228;GO:0050776
CGI_10021329	0.672311	0.00767004	26.1937	0.785752	0.000894902	26.3959	0.53849	0.0323878	27.8416	0.665518	PREDICTED: uncharacterized protein LOC105342455 [Crassostrea gigas]	0.5725	defense response to other organism ; response to external stimulus ; defense response ; response to stress	GO:0006952;GO:0042742;GO:000222GO:0008228;GO:0050776
CGI_10019645	0.339579	0.0240668	140.018	1.1827	4.42878e-19	116.69	0.373142	0.00943614	141.546	0.631808	cyclic GMP-AMP synthase- partial	0.61	defense response to other organism ; response to external stimulus ; defense response ; response to stress	GO:0006952;GO:0051607;GO:0039528;GO:0098586;GO:0050776
CGI_10008012	0.753657	2.60548e-13	168.369	0.310763	0.0303886	198.677	0.779181	1.03129e-09	170.613	0.614534	metallo-beta-lactamase domain-containing 1-like [Crassostrea gigas]	0.719	defense response to other organism ; response to external stimulus ; defense response ; response to stress	GO:0006952;GO:0042742
CGI_10009984	0.336862	0.0166206	528.151	1.08676	1.58412e-12	448.465	0.406519	0.019239	527.403	0.610046	Complement C1q 4	0.6135	defense response to other organism ; response to external stimulus ; defense response ; response to stress	GO:0006952;GO:0042742
CGI_10020694	0.633925	7.75728e-08	5676.95	0.429161	0.00217604	6256.63	0.531331	7.90103e-06	5971.28	0.531472	asialoglyco receptor 1-like	0.5835	defense response to other organism ; response to external stimulus ; defense response ; response to stress	GO:0006952;GO:0042742;GO:000222GO:0008228;GO:0050776
CGI_10022961	0.360302	6.8545e-11	920.575	0.54176	3.63456e-10	906.405	0.257286	1.96248e-05	971.066	0.38645	probable ATP-dependent RNA helicase DDX41	0.8595	defense response to other organism ; response to external stimulus ; defense response ; response to stress	GO:0003677;GO:0005524;GO:0008270;GO:0071013;GO:0016020;GO:0008152;GO:0051607;GO:0005783;GO:0004386;GO:0045944;GO:0044822;GO:0035458;GO:0006952;GO:0051607;GO:0039528;GO:0098586;GO:0050776
CGI_10027827	0.38146	1.19819e-05	3329.17	0.440031	3.6569e-10	3402.48	0.308511	7.10303e-05	3480.24	0.376667	macrophage-expressed gene 1 -like [Crassostrea gigas]	0.61	defense response to other organism ; response to external stimulus ; defense response ; response to stress	GO:0016021;GO:0006952;GO:0042742
CGI_10010147	0.288193	0.00106381	264.012	0.318116	0.000637343	271.837	0.367761	0.000241202	262.924	0.32469	mitofusin-2-like isoform X2	0.7475	defense response to other organism ; response to external stimulus ; defense response ; response to stress	GO:0005739;GO:0016020;GO:0006952;GO:0051607;GO:0039528;GO:0098586;GO:0050776
CGI_10005133	-0.300074	0.000300403	1512.85	-0.323155	6.51124e-05	1587.38	-0.322948	4.5871e-05	1559.68	-0.315392	IRF-Interferon regulatory factor 2	0.749	defense response to other organism ; response to external stimulus ; defense response ; response to stress	GO:0008283;GO:0003700;GO:0046872;GO:0006355;GO:0000975;GO:0006952;GO:0051607;GO:0039528;GO:0098586;GO:0050776
CGI_10027922	-0.311493	0.00897635	2119.08	-0.251907	0.0403228	2153.03	-0.409016	0.000137471	2250.29	-0.324139	Perlucin [Crassostrea gigas]	0.565	defense response to other organism ; response to external stimulus ; defense response ; response to stress	GO:0006952;GO:0042742;GO:000222GO:0008228;GO:0050776
CGI_10008626	-0.592904	1.10681e-05	424.156	-0.317599	0.00241168	393.19	-0.421416	0.000131462	402.839	-0.443973	Lectin	0.76	defense response to other organism ; response to external stimulus ; defense response ; response to stress	GO:0004888;GO:0046872;GO:0007165;GO:0016020;GO:0008237;GO:0006952;GO:0042742;GO:000222GO:0008228;GO:0050776
CGI_10008793	-0.512618	5.6812e-07	571.383	-0.228971	0.0331104	530.816	-0.67803	3.36127e-12	626.381	-0.473206	MAC Perforin domain containing	0.696	defense response to other organism ; response to external stimulus ; defense response ; response to stress	GO:0016021;GO:0006952;GO:0042742
CGI_10008239	-0.401542	0.000624397	532.277	-0.47019	1.84108e-06	568.69	-0.725013	1.52164e-20	621.495	-0.532248	Heavy metal-binding HIP	0.6545	defense response to other organism ; response to external stimulus ; defense response ; response to stress	GO:0006952;GO:0042742
CGI_10012232	-0.300724	0.0284735	812.588	-0.807686	3.27863e-06	1053.59	-0.52759	6.00404e-06	909.863	-0.545333	Hibernation-associated plasma HP-27	0.6495	defense response to other organism ; response to external stimulus ; defense response ; response to stress	GO:0006952;GO:0042742
CGI_10011498	-0.631906	1.50433e-05	88.2523	-1.08508	5.75639e-19	112.652	-0.349976	0.0223018	80.2188	-0.688989	metallo ase inhibitor 1 isoform X4 [Polistes canadensis]	0.4655	defense response to other organism ; response to external stimulus ; defense response ; response to stress	GO:0010951;GO:0005576;GO:0008191;GO:0006952;GO:0042742
CGI_10019092	-1.0293	3.58427e-13	96.9839	-0.32471	0.0391731	74.0496	-1.1198	4.29791e-14	103.875	-0.824601	interferon-induced 44-like [Crassostrea gigas]	0.804	defense response to other organism ; response to external stimulus ; defense response ; response to stress	GO:0006952;GO:0051607;GO:0039528;GO:0098586;GO:0050776
CGI_10004651	-0.972655	3.81047e-08	66.2738	-0.625154	0.00150256	58.9087	-1.13881	6.68794e-12	73.3386	-0.912207	Arrestin domain-containing 2	0.8175	defense response to other organism ; response to external stimulus ; defense response ; response to stress	GO:0016020;GO:0006952;GO:0042742
CGI_10024521	-1.01803	4.57409e-18	249.501	-1.12062	2.58377e-14	274.57	-0.981331	2.23252e-13	251.465	-1.03999	Caprin-2 [Crassostrea gigas]	0.785	defense response to other organism ; response to external stimulus ; defense response ; response to stress	GO:0006952;GO:0042742
CGI_10015043	-0.681452	0.00531851	527.692	-1.53865	8.30229e-13	850.358	-0.959654	0.00031692	623.694	-1.05992	heavy metal-binding HIP-like isoform X2 [Crassostrea gigas]	0.6515	defense response to other organism ; response to external stimulus ; defense response ; response to stress	GO:0005581;GO:0016021;GO:0006952;GO:0042742
CGI_10014903	-1.14295	1.37931e-23	329.962	-0.57444	1.75049e-08	264.57	-1.52235	5.64086e-43	408.956	-1.07991	low affinity immunoglobulin epsilon Fc receptor isoform X1 [Chinchilla lanigera]	0.633	defense response to other organism ; response to external stimulus ; defense response ; response to stress	GO:0016021;GO:0006952;GO:0042742;GO:000222GO:0008228;GO:0050776
CGI_10007278	-1.29222	7.71383e-07	52.7798	-0.609943	0.0305982	38.597	-1.41564	2.59492e-09	57.0159	-1.10593	complement C1q tumor necrosis factor-related 3-like	0.683	defense response to other organism ; response to external stimulus ; defense response ; response to stress	GO:0006952;GO:0042742
CGI_10015042	-0.961696	0.000129663	280.189	-1.52619	6.73426e-12	391.023	-0.847214	0.00210574	272.093	-1.1117	complement C1q 4	0.6505	defense response to other organism ; response to external stimulus ; defense response ; response to stress	GO:0016021;GO:0006952;GO:0042742
CGI_10021742	-1.60378	1.3743e-14	400.735	-0.647697	0.00145855	254.421	-1.18753	8.47617e-10	324.563	-1.14633	Complement C1q 4	0.753	defense response to other organism ; response to external stimulus ; defense response ; response to stress	GO:0006952;GO:0042742
CGI_10014532	-0.502049	0.00128094	127.102	-2.05703	1.29003e-120	285.005	-0.930494	1.8905e-11	157.214	-1.16319	interferon-induced 44-like [Crassostrea gigas]	0.902	defense response to other organism ; response to external stimulus ; defense response ; response to stress	GO:0005525;GO:0006952;GO:0051607;GO:0039528;GO:0098586;GO:0050776
CGI_10009274	-1.00386	2.84522e-07	255.809	-1.30431	2.67287e-10	311.793	-1.23104	1.55955e-10	293.458	-1.17974	Multimerin-2 [Crassostrea gigas]	0.695	defense response to other organism ; response to external stimulus ; defense response ; response to stress	GO:0006952;GO:0042742
CGI_10005029	-0.609042	0.00053714	147.285	-1.37502	1.51658e-14	222.909	-1.60867	1.53441e-24	246.231	-1.19758	Caprin-2 [Crassostrea gigas]	0.759	defense response to other organism ; response to external stimulus ; defense response ; response to stress	GO:0006952;GO:0042742
CGI_10006081	-1.3599	1.16315e-22	483.033	-0.546557	0.000354552	342.438	-1.96598	6.16216e-41	690.057	-1.29081	deoxynucleoside triphosphate triphosphohydrolase SAMHD1-like	0.6265	defense response to other organism ; response to external stimulus ; defense response ; response to stress	GO:0044464;GO:0005488;GO:0009987;GO:0006952;GO:0051607;GO:0039528;GO:0098586;GO:0050776
CGI_10002247	-1.41439	6.68762e-14	107.407	-0.945503	0.000199345	89.1766	-1.72	4.62281e-18	130.967	-1.35996	Complement C1q 2	0.6675	defense response to other organism ; response to external stimulus ; defense response ; response to stress	GO:0006952;GO:0042742
CGI_10004067	-2.60388	6.04112e-40	195.734	-0.8862	0.000861284	77.4048	-0.793392	0.000937733	72.3107	-1.42782	2'-5' OAS / 2 -5 -oligoadenylate synthase 1	0.6085	defense response to other organism ; response to external stimulus ; defense response ; response to stress	GO:0005524;GO:0016779;GO:0006955;GO:0003725;GO:0008152;GO:0051607;GO:0006952;GO:0051607;GO:0039528;GO:0098586;GO:0050776
CGI_10027905	-1.60461	1.13996e-18	415.197	-0.632247	0.000112967	263.93	-2.0943	7.67427e-24	575.543	-1.44372	macrophage-expressed gene 1 -like	0.7025	defense response to other organism ; response to external stimulus ; defense response ; response to stress	GO:0016021;GO:0006952;GO:0042742
CGI_10011342	-1.74966	4.77421e-07	10.4521	-1.1673	0.0022803	7.59689	-1.63734	5.0569e-06	10.1272	-1.5181	Complement C1q 4	0.682	defense response to other organism ; response to external stimulus ; defense response ; response to stress	GO:0006952;GO:0042742
CGI_10015655	-1.49396	3.59674e-05	8.00915	-1.4531	7.56576e-05	8.20361	-1.72535	2.04956e-06	9.82226	-1.55747	Aggrecan core	0.6895	defense response to other organism ; response to external stimulus ; defense response ; response to stress	GO:0004553;GO:0006952;GO:0042742;GO:000222GO:0008228;GO:0050776
CGI_10003519	-1.51229	1.53842e-07	67.6809	-1.07865	0.000593317	55.3193	-2.19327	3.39734e-13	111.016	-1.59474	metallothionein IV	0.8986	defense response to other organism ; response to external stimulus ; defense response ; response to stress	GO:0046872;GO:0006952;GO:0042742
CGI_10028067	-1.99734	2.44763e-11	18.1776	-1.10838	0.00101744	11.0344	-1.86285	7.37992e-09	17.6361	-1.65619	Complement C1q 4	0.7265	defense response to other organism ; response to external stimulus ; defense response ; response to stress	GO:0006952;GO:0042742
CGI_10011923	-1.63023	8.65029e-26	122.716	-1.87121	4.45766e-27	147.633	-1.4876	1.62143e-20	116.493	-1.66301	Complement C1q 2	0.6715	defense response to other organism ; response to external stimulus ; defense response ; response to stress	GO:0006952;GO:0042742
CGI_10018927	-2.21391	8.46981e-09	10.6057	-1.43603	0.000621976	6.1869	-1.41421	0.00164892	6.97654	-1.68805	L-amino-acid oxidase-like	0.5895	defense response to other organism ; response to external stimulus ; defense response ; response to stress	GO:0098542;GO:0016491
CGI_10004653	-1.9214	2.4448e-05	82.5923	-1.14474	0.0194664	36.1818	-2.17075	9.83408e-07	111.147	-1.74563	heavy metal-binding HIP-like isoform X2 [Crassostrea gigas]	0.7035	defense response to other organism ; response to external stimulus ; defense response ; response to stress	GO:0006952;GO:0042742
CGI_10024034	-1.47246	8.9049e-09	118.406	-2.77723	1.24813e-34	273.082	-2.01593	2.74506e-21	162.313	-2.08854	complement C1q tumor necrosis factor-related 3-like	0.7385	defense response to other organism ; response to external stimulus ; defense response ; response to stress	GO:0005581;GO:0016021;GO:0006952;GO:0042742
CGI_10020474	0.519513	0.00497642	6163.08	0.574503	0.000185306	6318.12	0.744002	4.53861e-05	5911.96	0.612673	Scavenger receptor -like	0.5885	defense response to other organism ; response to external stimulus ; defense response ; response to stressreceptor-mediated endocytosis	GO:0004725;GO:0005509;GO:0016020;GO:0005044;GO:0006898;GO:0035335;GO:0006952;GO:0042742
CGI_10023034	-0.728374	0.00502267	21.9788	-0.89004	0.000191224	24.7713	-0.960252	0.00215374	25.8549	-0.859555	[Nematostella vectensis]	0.7035	defense response to other organism ; response to external stimulus ; defense response ; response to stressreceptor-mediated endocytosis	GO:0016020;GO:0005044;GO:0006898;GO:0006952;GO:0042742
CGI_10022225	-1.0373	4.24304e-09	815.707	-1.16381	1.90013e-24	891.103	-1.26748	1.37877e-17	929.614	-1.15619	Scavenger receptor -like	0.6955	defense response to other organism ; response to external stimulus ; defense response ; response to stressreceptor-mediated endocytosis	GO:0016020;GO:0005044;GO:0006898;GO:0006952;GO:0042742
CGI_10017479	-2.38677	2.80836e-69	201.54	-2.15408	5.78488e-25	191.055	-0.800969	0.0145783	91.8105	-1.78061	Protocadherin Fat 4	0.8	defense response to other organism ; response to external stimulus ; defense response ; response to stressreceptor-mediated endocytosis	GO:0005509;GO:0016020;GO:0005044;GO:0006898;GO:0006952;GO:0042742
CGI_10015479	-2.33197	2.85382e-15	28.9612	-1.20215	0.00114207	15.1361	-2.92656	1.76449e-33	41.3948	-2.15356	Scavenger receptor	0.55	defense response to other organism ; response to external stimulus ; defense response ; response to stressreceptor-mediated endocytosis	GO:0016020;GO:0005044;GO:0006898;GO:0006952;GO:0042742
CGI_10010099	4.0919	2.12878e-31	32.9215	3.77919	2.28654e-28	34.6037	4.75802	1.87278e-36	32.9338	4.2097	tripartite motif-containing 2-like	0.777	protein modification by small protein conjugation or removal	GO:0022857;GO:0016020;GO:0006810;GO:0016567
CGI_10022420	0.725781	0.000104972	58.2536	4.56582	4.94945e-46	38.6981	2.69559	1.88591e-28	42.1893	2.6624	Tripartite motif-containing 2	0.6615	protein modification by small protein conjugation or removal	GO:0008270;GO:0005622;GO:0016567
CGI_10006644	1.95676	1.82479e-09	17.5196	2.22672	1.55539e-11	17.593	2.52546	3.9564e-14	16.6777	2.23631	FERM and PDZ domain-containing 1	0.597	protein modification by small protein conjugation or removal	GO:0004842;GO:0016567
CGI_10010495	2.29493	2.5761e-07	3.68211	2.35501	9.67234e-08	3.81973	1.96102	7.77934e-06	3.99169	2.20365	Tripartite motif-containing 2	0.6695	protein modification by small protein conjugation or removal	GO:0016567
CGI_10009603	3.62776	3.45368e-34	50.3168	1.21654	2.81267e-06	69.588	1.47701	1.71618e-20	65.8309	2.1071	Tripartite motif-containing 56 [Crassostrea gigas]	0.597	protein modification by small protein conjugation or removal	GO:0008270;GO:0005622;GO:0016567
CGI_10015637	2.7907	2.77425e-36	71.4029	2.07358	2.74483e-28	80.5302	1.38818	7.0689e-14	88.5688	2.08416	Tripartite motif-containing 2	0.617	protein modification by small protein conjugation or removal	GO:0008270;GO:0005622;GO:0016567
CGI_10023075	2.88961	1.01124e-18	17.9964	1.29733	2.93369e-06	23.5657	2.0297	1.673e-13	20.4153	2.07221	PREDICTED: uncharacterized protein LOC105333711	0.6435	protein modification by small protein conjugation or removal	GO:0004842;GO:0016567
CGI_10008912	3.09625	1.08183e-36	46.2789	0.589619	0.0162655	72.4681	1.84649	3.64348e-21	54.5386	1.84412	Tripartite motif-containing 45	0.7805	protein modification by small protein conjugation or removal	GO:0000166;GO:0043167;GO:0016567
CGI_10010494	1.91309	3.11271e-05	2.83579	1.96692	1.61337e-05	2.94817	1.58456	0.00060126	3.21239	1.82152	Tripartite motif-containing 2	0.649	protein modification by small protein conjugation or removal	GO:0016567
CGI_10008619	1.01471	0.00149626	16.6406	0.825853	0.0193469	18.0119	1.89721	5.73436e-09	14.1968	1.24592	Tripartite motif-containing 45	0.76	protein modification by small protein conjugation or removal	GO:0016567
CGI_10004083	1.23445	0.00918856	1.6956	1.13507	0.0206157	1.89886	1.02496	0.0372058	1.9675	1.13149	hypothetical protein CGI_10004083	0.6455	protein modification by small protein conjugation or removal	GO:0004842;GO:0016567
CGI_10014390	1.8873	5.71203e-08	9.55695	0.767774	0.0150093	12.8279	0.718118	0.0253789	12.7909	1.1244	Tripartite motif-containing 2	0.784	protein modification by small protein conjugation or removal	GO:0008270;GO:0005622;GO:0016567
CGI_10001671	1.15731	3.17631e-06	28.097	0.800787	0.00313914	31.8302	1.39777	1.35783e-09	27.3708	1.11862	Tripartite motif-containing 2 [Crassostrea gigas]	0.86	protein modification by small protein conjugation or removal	GO:0008270;GO:0005622;GO:0016567
CGI_10008909	1.54057	8.03181e-14	38.4625	1.17195	1.10819e-08	43.0521	0.507474	0.00804139	50.2648	1.07333	Tripartite motif-containing 45	0.716	protein modification by small protein conjugation or removal	GO:0016567
CGI_10005103	1.31333	2.87337e-22	383.221	1.44545	2.24001e-23	388.224	0.367494	0.00640428	498.093	1.04209	Tripartite motif-containing 2	0.899	protein modification by small protein conjugation or removal	GO:0008270;GO:0016021;GO:0005622;GO:0016567
CGI_10026066	1.29367	0.00474555	5.16042	0.873051	0.0493445	6.15869	0.879476	0.0442676	6.03591	1.0154	Tripartite motif-containing 2	0.78	protein modification by small protein conjugation or removal	GO:0016567
CGI_10010118	0.813487	8.75441e-06	66.6167	1.09752	1.6147e-11	64.8014	1.12849	1.59457e-09	63.0525	1.01316	Tripartite motif-containing 3	0.92	protein modification by small protein conjugation or removal	GO:0008270;GO:0005622;GO:0016567
CGI_10022858	1.00761	5.52978e-07	54.7005	1.15078	1.55997e-08	54.9374	0.863571	4.45588e-06	57.9868	1.00732	Tripartite motif-containing 2	0.5485	protein modification by small protein conjugation or removal	GO:0016567
CGI_10014422	0.860706	8.87329e-06	80.4301	0.777812	0.000556936	85.272	1.14045	1.06876e-11	77.1373	0.926324	Tripartite motif-containing 45 [Crassostrea gigas]	0.5805	protein modification by small protein conjugation or removal	GO:0008270;GO:0005622;GO:0016567
CGI_10019703	0.990316	1.33475e-14	127.748	0.749331	9.89872e-12	141.348	0.778199	1.1043e-07	137.444	0.839282	Tripartite motif-containing 3	0.861	protein modification by small protein conjugation or removal	GO:0008270;GO:0005622;GO:0016567
CGI_10017813	1.14221	5.97654e-22	287.067	0.772349	6.35064e-16	326.606	0.540177	1.47768e-05	341.539	0.818246	Tripartite motif-containing 2	0.868	protein modification by small protein conjugation or removal	GO:0008270;GO:0005622;GO:0016567
CGI_10016373	0.909997	1.53124e-21	185.756	0.796533	5.74432e-07	197.751	0.668201	2.67007e-11	201.781	0.791577	Tripartite motif-containing 2	0.7925	protein modification by small protein conjugation or removal	GO:0008270;GO:0005622;GO:0016567
CGI_10001329	0.329937	0.0115602	286.537	1.12434	5.02399e-22	241.537	0.815489	6.98947e-12	255.361	0.756587	Tripartite motif-containing 3	0.662	protein modification by small protein conjugation or removal	GO:0008270;GO:0005622;GO:0016567
CGI_10007055	0.728658	5.74486e-12	152.176	0.952881	4.30594e-23	149.816	0.511705	1.05969e-05	165.357	0.731081	Tripartite motif-containing 3	0.8775	protein modification by small protein conjugation or removal	GO:0008270;GO:0005622;GO:0016567
CGI_10023339	0.234513	0.0353945	355.094	0.672632	1.51391e-13	324.59	1.15917	6.7627e-41	283.612	0.688773	Tripartite motif-containing 3	0.878	protein modification by small protein conjugation or removal	GO:0008270;GO:0005622;GO:0016567
CGI_10013461	0.478116	1.10048e-06	167.67	0.865177	7.90414e-20	157.079	0.697395	1.97217e-12	161.183	0.680229	Tripartite motif-containing 2	0.8665	protein modification by small protein conjugation or removal	GO:0008270;GO:0005622;GO:0016567
CGI_10012136	0.487654	0.00486837	78.0958	0.798629	2.74689e-06	74.5951	0.725142	0.00114167	74.5116	0.670475	Tripartite motif-containing 2	0.587	protein modification by small protein conjugation or removal	GO:0016567
CGI_10018009	0.335042	0.000920523	217.578	0.77256	7.49942e-17	199.919	0.864051	1.98262e-16	191.783	0.657218	Tripartite motif-containing 3	0.7715	protein modification by small protein conjugation or removal	GO:0008270;GO:0005622;GO:0016567
CGI_10008486	0.570968	2.03934e-08	164.711	0.591488	6.12201e-10	170.273	0.619535	3.84609e-08	165.994	0.593997	Tripartite motif-containing 3	0.89	protein modification by small protein conjugation or removal	GO:0008270;GO:0071203;GO:0016567
CGI_10027799	0.347844	2.48226e-05	492.679	0.343799	6.85156e-05	513.343	0.955968	3.56992e-43	427.107	0.549204	Tripartite motif-containing 3	0.8465	protein modification by small protein conjugation or removal	GO:0008270;GO:0016021;GO:0005622;GO:0016567
CGI_10015672	0.578699	3.12096e-05	81.2163	0.355152	0.0172683	90.4164	0.687731	3.14172e-06	80.7151	0.540527	Tripartite motif-containing 2	0.888	protein modification by small protein conjugation or removal	GO:0008270;GO:0005622;GO:0016567
CGI_10000852	0.385916	0.00278512	1276.37	0.593777	3.94457e-08	1249.55	0.618213	8.24585e-06	1217.62	0.532635	baculoviral IAP repeat-containing 3-like [Crassostrea gigas]	0.7015	protein modification by small protein conjugation or removal	GO:1990001;GO:0005634;GO:0005876;GO:0004842;GO:0008270;GO:0005737;GO:0043027;GO:0009966;GO:0051865;GO:0090307;GO:0043066;GO:0042981
CGI_10017591	0.771496	5.64996e-11	354.442	0.32699	0.000799334	418.623	0.42394	8.3842e-06	399.21	0.507475	Tripartite motif-containing 2	0.772	protein modification by small protein conjugation or removal	GO:0016567
CGI_10008923	0.453415	0.0151613	62.3473	0.602223	0.000602644	62.1092	0.44997	0.0253726	63.8609	0.501869	Tripartite motif-containing 3	0.8725	protein modification by small protein conjugation or removal	GO:0008270;GO:0005622;GO:0016567
CGI_10009052	0.507044	0.000232317	383.225	0.469863	5.52821e-07	403.497	0.470454	5.14757e-06	396.261	0.482454	Tripartite motif-containing 2	0.651	protein modification by small protein conjugation or removal	GO:0008270;GO:0005622;GO:0016567
CGI_10002733	0.24853	0.0298906	268.547	0.439303	1.39665e-07	263.511	0.735962	6.18834e-17	238.245	0.474598	Tripartite motif-containing 3	0.866	protein modification by small protein conjugation or removal	GO:0008270;GO:0005622;GO:0016567
CGI_10003444	0.470169	0.000465968	151.208	0.337098	0.0399326	163.813	0.438004	0.00127966	156.151	0.41509	Tripartite motif-containing 3	0.843	protein modification by small protein conjugation or removal	GO:0008270;GO:0006886;GO:0008536;GO:0005622;GO:0016567
CGI_10026697	0.264537	0.0115352	240.505	0.254773	0.0267275	250.743	0.698852	2.98158e-15	216.582	0.406054	Tripartite motif-containing 2	0.907	protein modification by small protein conjugation or removal	GO:0005524;GO:0008270;GO:0042626;GO:0055085;GO:0006508;GO:0016021;GO:0004222;GO:0005622;GO:0016567
CGI_10003031	0.324092	0.0077065	178.465	0.462344	1.92808e-06	178.257	0.350688	0.00376148	181.197	0.379042	ubiquitin carboxyl-terminal hydrolase 30-like	0.5845	protein modification by small protein conjugation or removal	GO:0016579;GO:0036459;GO:0006511
CGI_10022653	0.338017	0.0247674	125.474	0.331104	0.0163252	130.895	0.347997	0.00691685	128.055	0.33904	Tripartite motif-containing 2	0.9005	protein modification by small protein conjugation or removal	GO:0005524;GO:0008270;GO:0042626;GO:0055085;GO:0006508;GO:0016021;GO:0004222;GO:0005622;GO:0016567
CGI_10022031	-0.296409	0.02357	231.397	-0.346431	0.00407917	245.295	-0.275308	0.0323663	234.353	-0.306049	Tripartite motif-containing 2	0.625	protein modification by small protein conjugation or removal	GO:0008270;GO:0007229;GO:0006508;GO:0016021;GO:0004222;GO:0005622;GO:0016567
CGI_10021670	-0.357363	0.00187677	186.143	-0.282142	0.0283929	187.854	-0.379669	0.000937562	191.979	-0.339725	Tripartite motif-containing 2	0.8445	protein modification by small protein conjugation or removal	GO:0008270;GO:0005622;GO:0016567
CGI_10014710	-0.462678	7.84817e-07	199.565	-0.290392	0.00277656	193.829	-0.26816	0.0106744	188.789	-0.34041	tripartite motif-containing 54	0.5125	protein modification by small protein conjugation or removal	GO:0008270;GO:0005622;GO:0016567
CGI_10012944	-0.492865	1.52433e-05	241.651	-0.343052	0.0162236	236.724	-0.347923	0.0448691	233.46	-0.394613	Tripartite motif-containing 45	0.98	protein modification by small protein conjugation or removal	GO:0008270;GO:0005622;GO:0016567
CGI_10014314	-0.341028	5.96929e-08	2834.28	-0.398127	1.41795e-07	3015.21	-0.51706	5.69681e-16	3107.56	-0.418738	mitochondrial 10-formyltetrahydrofolate dehydrogenase	0.7745	protein modification by small protein conjugation or removal	GO:0047105;GO:0048513;GO:0009058;GO:0044763;GO:0009888;GO:0043227;GO:0044281;GO:0005737;GO:0048598;GO:0019145;GO:0016155;GO:0055114;GO:0016742;GO:0016567
CGI_10015405	-0.440116	1.31907e-05	288.217	-0.417826	5.63152e-05	297.177	-0.451487	1.44967e-06	295.83	-0.436476	nitric oxide synthase-interacting homolog	0.795	protein modification by small protein conjugation or removal	GO:0005634;GO:0004842;GO:0005737;GO:0050999;GO:0016567
CGI_10025269	-0.646609	5.20265e-08	249.169	-0.379088	0.00178988	231.942	-0.283873	0.0496963	219.344	-0.436524	Tripartite motif-containing 3	0.8685	protein modification by small protein conjugation or removal	GO:0008270;GO:0005622;GO:0016567
CGI_10007962	-0.631202	1.25852e-08	149.831	-0.275043	0.0258753	134.717	-0.450527	9.65026e-05	142.161	-0.452257	Tripartite motif-containing 3	0.88	protein modification by small protein conjugation or removal	GO:0008270;GO:0005622;GO:0016567
CGI_10023842	-0.559585	0.000482845	63.9388	-0.446276	0.0096338	63.3471	-0.36058	0.0334612	60.079	-0.455481	tripartite motif-containing 55-like [Crassostrea gigas]	0.784	protein modification by small protein conjugation or removal	GO:0008270;GO:0005622;GO:0016567
CGI_10019905	-0.495607	0.00562608	101.557	-0.308348	0.0437828	97.6929	-0.681657	6.58722e-07	112.013	-0.495204	Tripartite motif-containing 2	0.613	protein modification by small protein conjugation or removal	GO:0008270;GO:0005622;GO:0016567
CGI_10001911	-0.481458	0.00283927	148.029	-0.431689	0.0053494	150.806	-0.583803	8.18078e-05	157.872	-0.498983	Tripartite motif-containing 3	0.8615	protein modification by small protein conjugation or removal	GO:0008270;GO:0005622;GO:0016567
CGI_10017739	-0.54016	1.46845e-05	776.609	-0.35302	1.98349e-05	746.651	-0.674504	2.24214e-23	836.632	-0.522561	Tripartite motif-containing 56 [Crassostrea gigas]	0.4705	protein modification by small protein conjugation or removal	GO:0008270;GO:0005622;GO:0016567
CGI_10010602	-0.439742	0.00016791	146.919	-0.858504	4.08048e-15	183.198	-0.362191	0.00412839	145.538	-0.553479	Tripartite motif-containing 3	0.785	protein modification by small protein conjugation or removal	GO:0008270;GO:0005622;GO:0016567
CGI_10005988	-0.546685	0.0275205	99.0604	-0.673445	4.05869e-05	107.989	-0.611039	2.28759e-05	103.017	-0.610389	Tripartite motif-containing 56 [Crassostrea gigas]	0.6255	protein modification by small protein conjugation or removal	GO:0008270;GO:0008152;GO:0005622;GO:0016874;GO:0016567
CGI_10007284	-0.611263	0.000287268	79.7608	-0.575621	0.00101233	81.5703	-0.79555	2.40078e-07	88.3871	-0.660811	Tripartite motif-containing 3	0.837	protein modification by small protein conjugation or removal	GO:0008270;GO:0005622;GO:0016567
CGI_10002997	-0.962368	9.15971e-11	233.107	-0.842539	2.95306e-12	228.581	-0.227969	0.0371399	173.456	-0.677625	Tripartite motif-containing 3	0.721	protein modification by small protein conjugation or removal	GO:0016567
CGI_10021540	-0.612442	0.00284381	58.5759	-0.548742	0.00595728	59.214	-0.892008	5.33983e-08	67.7214	-0.684397	Tripartite motif-containing 3	0.905	protein modification by small protein conjugation or removal	GO:0008270;GO:0071203;GO:0016567
CGI_10011716	-0.831663	0.00169466	30.1921	-0.590227	0.019799	27.852	-0.64543	0.022508	28.3218	-0.689106	Tripartite motif-containing 2	0.838	protein modification by small protein conjugation or removal	GO:0008270;GO:0005622;GO:0016567
CGI_10008925	-0.588292	5.13934e-07	131.601	-0.493132	0.00153537	131.844	-1.00618	2.59102e-21	162.308	-0.695866	Tripartite motif-containing 3	0.84	protein modification by small protein conjugation or removal	GO:0008270;GO:0005622;GO:0016567
CGI_10010222	-1.33182	3.83682e-21	90.2239	-0.511305	0.00453013	64.0819	-0.510436	0.00216369	62.7185	-0.784521	tripartite motif-containing 55-like [Crassostrea gigas]	0.777	protein modification by small protein conjugation or removal	GO:0008270;GO:0005622;GO:0016567
CGI_10023624	-0.62544	3.63546e-09	182.846	-0.748904	5.00947e-18	200.367	-1.04378	5.41366e-19	226.437	-0.806042	Tripartite motif-containing 2	0.8695	protein modification by small protein conjugation or removal	GO:0008270;GO:0005622;GO:0016567
CGI_10022395	-0.633876	0.00014672	178.795	-0.332833	0.045774	163.824	-1.45889	8.26367e-24	272.366	-0.808534	Tripartite motif-containing 3	0.836	protein modification by small protein conjugation or removal	GO:0008270;GO:0016310;GO:0016301;GO:0005622;GO:0016567
CGI_10009605	-1.10627	6.83881e-22	236.699	-0.668744	5.08449e-13	200.753	-0.657404	8.90939e-13	196.37	-0.810806	Tripartite motif-containing 2	0.9095	protein modification by small protein conjugation or removal	GO:0008270;GO:0005622;GO:0016567
CGI_10025048	-1.21268	6.12627e-15	78.0428	-0.835259	6.3222e-08	67.5955	-0.423325	0.0356404	55.7213	-0.823754	Tripartite motif-containing 3	0.819	protein modification by small protein conjugation or removal	GO:0008270;GO:0005622;GO:0016567
CGI_10022541	-0.822019	0.000287054	28.2538	-0.6935	0.0067573	27.8436	-0.967082	2.13669e-06	30.8919	-0.827534	Tripartite motif-containing 2	0.891	protein modification by small protein conjugation or removal	GO:0008270;GO:0005622;GO:0016567
CGI_10012790	-0.621747	0.039394	26.6434	-1.01345	0.000100401	33.4381	-0.901848	0.00124392	31.2392	-0.845681	Tripartite motif-containing 3	0.618	protein modification by small protein conjugation or removal	GO:0008270;GO:0005622;GO:0016567
CGI_10011198	-0.587639	0.00109009	135.02	-0.947758	1.81324e-14	163.998	-1.00724	1.4055e-08	167.708	-0.847545	Tripartite motif-containing 2	0.706	protein modification by small protein conjugation or removal	GO:0008270;GO:0005622;GO:0016567
CGI_10012227	-0.938494	8.11072e-06	29.7276	-0.740886	0.000776728	28.074	-0.985633	4.14655e-06	31.0517	-0.888338	tripartite motif-containing 3 isoform X2	0.545	protein modification by small protein conjugation or removal	GO:0008270;GO:0005622;GO:0016567
CGI_10011991	-0.535554	0.0386586	31.0104	-1.70926	9.01981e-20	57.9277	-0.555696	0.0309828	31.9143	-0.933504	Tripartite motif-containing 2	0.8255	protein modification by small protein conjugation or removal	GO:0008270;GO:0005622;GO:0016567
CGI_10011352	-0.919332	1.9536e-12	107.292	-0.994217	3.67834e-15	115.725	-0.924976	4.34566e-13	110.085	-0.946175	tripartite motif-containing 55-like [Crassostrea gigas]	0.722	protein modification by small protein conjugation or removal	GO:0008270;GO:0005622;GO:0016567
CGI_10013825	-0.792696	0.00192838	27.1618	-1.00006	4.30301e-05	31.3401	-1.24107	6.93771e-08	34.8539	-1.01127	Tripartite motif-containing 3	0.847	protein modification by small protein conjugation or removal	GO:0008270;GO:0005622;GO:0016567
CGI_10004170	-0.496294	0.00503104	66.6456	-1.0211	3.15245e-10	88.1849	-1.51898	1.49203e-27	111.109	-1.01212	tripartite motif-containing 3-like [Crassostrea gigas]	0.8765	protein modification by small protein conjugation or removal	GO:0008270;GO:0005622;GO:0016567
CGI_10027496	-0.449	0.0357601	37.7843	-1.63181	3.1811e-22	70.0311	-1.1618	8.58767e-09	54.2665	-1.08087	Tripartite motif-containing 3	0.6365	protein modification by small protein conjugation or removal	GO:0008270;GO:0005622;GO:0016567
CGI_10012976	-1.02982	4.62336e-06	38.9979	-0.708353	0.0025783	34.6781	-1.77254	2.77141e-18	59.4501	-1.17024	Tripartite motif-containing 2	0.8715	protein modification by small protein conjugation or removal	GO:0008270;GO:0005622;GO:0016567
CGI_10011467	-0.794545	0.000419231	42.1578	-1.135	4.16034e-07	52.1469	-1.67991	1.07971e-20	67.843	-1.20315	Tripartite motif-containing 3	0.8575	protein modification by small protein conjugation or removal	GO:0008270;GO:0005622;GO:0016567
CGI_10007884	-1.32841	6.17432e-05	13.2606	-1.61887	3.63e-08	16.0118	-0.811895	0.0274079	10.176	-1.25306	Tripartite motif-containing 3	0.8795	protein modification by small protein conjugation or removal	GO:0008270;GO:0005622;GO:0016567
CGI_10004271	-1.79469	1.19479e-15	31.0327	-0.999559	0.000179207	20.9471	-1.44908	7.19487e-10	26.0242	-1.41444	Tripartite motif-containing 2	0.7675	protein modification by small protein conjugation or removal	GO:0008270;GO:0005622;GO:0016567
CGI_10006462	-1.73942	5.6589e-07	9.72999	-1.29358	0.000958188	7.76547	-1.32122	0.000464771	7.72739	-1.45141	Tripartite motif-containing 3	0.762	protein modification by small protein conjugation or removal	GO:0003677;GO:0008270;GO:0005622;GO:0016567
CGI_10001910	-1.22873	2.20239e-05	31.6368	-1.24479	2.28783e-06	32.7767	-2.03561	3.22875e-17	50.9757	-1.50304	Tripartite motif-containing 2	0.8735	protein modification by small protein conjugation or removal	GO:0008270;GO:0016310;GO:0016301;GO:0005622;GO:0016567
CGI_10010605	-2.18059	9.5683e-21	35.1445	-1.61585	6.18191e-11	26.1351	-0.824235	0.00552096	16.8602	-1.54022	Tripartite motif-containing 3	0.7885	protein modification by small protein conjugation or removal	GO:0008270;GO:0005622;GO:0016567
CGI_10019786	-1.59235	9.55931e-13	52.6717	-2.10537	1.34137e-35	71.9013	-1.5284	7.34834e-15	51.3137	-1.74204	Tripartite motif-containing 2	0.6295	protein modification by small protein conjugation or removal	GO:0008270;GO:0005622;GO:0016567
CGI_10001617	-0.755501	0.0419269	14.4354	-2.26746	9.23447e-18	35.9987	-2.28225	1.13232e-16	36.3121	-1.7684	tripartite motif-containing 45-like	0.6825	protein modification by small protein conjugation or removal	GO:0008270;GO:0005622;GO:0016567
CGI_10001621	-2.60698	5.67415e-10	7.64592	-1.28113	0.00792124	2.40231	-2.64854	7.67271e-11	7.29634	-2.17888	Tripartite motif-containing 2	0.7675	protein modification by small protein conjugation or removal	GO:0008270;GO:0005622;GO:0016567
CGI_10016483	3.89648	5.26342e-37	109.083	1.55164	1.54712e-08	141.753	2.03495	1.21788e-07	123.383	2.49436	short-chain collagen C4-like	0.8535	receptor-mediated endocytosis	GO:0016020;GO:0005044;GO:0006898
CGI_10003387	0.950351	1.17645e-09	66.343	0.976954	4.5017e-12	68.568	1.39951	1.83348e-19	61.4607	1.10894	Scavenger receptor	0.8645	receptor-mediated endocytosis	GO:0003824;GO:0016021;GO:0005044;GO:0005488;GO:0006898
CGI_10012446	0.807107	1.56023e-06	105.304	0.615242	0.000115729	115.53	0.6483	3.38556e-05	112.546	0.690217	Tripartite motif-containing 3	0.4795	receptor-mediated endocytosis ; protein modification by small protein conjugation or removal	GO:0016020;GO:0005044;GO:0006898;GO:0016567
CGI_10021822	1.96025	1.9547e-05	46.4402	0.829662	6.84844e-05	71.321	4.63445	1.24863e-47	46.064	2.47479	poly [ADP-ribose] polymerase 1-like [Crassostrea gigas]	0.511	response to external stimulus	GO:0003677;GO:0008270;GO:0016740;GO:0044237;GO:0098586
CGI_10006076	1.22295	2.48509e-07	191.128	0.881278	0.000193683	215.518	1.74046	2.12951e-11	176.217	1.28156	Proline-rich transmembrane 1	0.74	response to external stimulus	GO:0009607;GO:0016021
CGI_10008659	1.28079	2.73874e-24	354.446	0.859565	8.84609e-14	405.746	1.17688	5.86028e-21	370.154	1.10575	poly [ADP-ribose] polymerase 15-like [Crassostrea gigas]	0.6255	response to external stimulus	GO:0008152;GO:0003950;GO:0098586
CGI_10027443	1.85722	1.30507e-05	195.581	0.85853	9.61553e-06	271.704	0.595434	0.00223191	286.681	1.10373	helicase with zinc finger domain 2-like isoform X1 [Crassostrea gigas]	0.976	response to external stimulus	GO:0039528;GO:0098586;GO:0050776
CGI_10022270	0.630736	1.25792e-06	175.148	1.67484	1.62604e-47	145.18	0.992556	1.35093e-15	163.239	1.09938	fantom-like isoform X2	0.77	response to external stimulus	GO:0006935;GO:0042384;GO:0016021;GO:0035869
CGI_10027444	1.60133	2.86852e-09	668.252	0.744467	4.98302e-06	854.202	0.467998	0.00495778	907.443	0.937933	helicase with zinc finger domain 2-like isoform X1 [Crassostrea gigas]	0.6475	response to external stimulus	GO:0039528;GO:0098586;GO:0050776
CGI_10027445	0.959075	2.08542e-05	920.051	1.01589	1.17276e-09	950.329	0.789648	2.03267e-07	988.811	0.921539	helicase with zinc finger domain 2-like isoform X1 [Crassostrea gigas]	0.7905	response to external stimulus	GO:0039528;GO:0098586;GO:0050776
CGI_10023410	0.381466	0.00289165	326.396	0.316155	0.0108463	346.39	0.422866	0.000113875	329.593	0.373496	ATP-dependent RNA helicase DDX18	0.915	response to external stimulus	GO:0005524;GO:0016020;GO:0008152;GO:0030099;GO:0004386;GO:0005730;GO:0044822;GO:0039528;GO:0098586;GO:0050776
CGI_10017403	0.259256	0.00687814	461.464	0.189515	0.0260302	490.928	0.339758	6.48295e-05	459.928	0.262843	eukaryotic translation initiation factor partial	0.8745	response to external stimulus	GO:0000166;GO:0003743;GO:0016020;GO:0048589;GO:0006413;GO:0019953;GO:0044822
CGI_10006003	0.282736	2.81861e-05	1327.57	0.158734	0.0369517	1436.23	0.258332	4.52256e-05	1367.35	0.233268	ATP-dependent RNA helicase DBP2	0.732	response to external stimulus	GO:0003676;GO:0005524;GO:0016070;GO:0005737;GO:0043231;GO:0004386;GO:0022613;GO:0039528;GO:0098586;GO:0050776
CGI_10005336	-0.251575	0.017715	367.729	-0.395561	1.14264e-05	404.568	-0.307943	0.00202532	384.248	-0.31836	poly [ADP-ribose] polymerase partial	0.65	response to external stimulus	GO:0098586
CGI_10027901	-0.366983	0.0318031	208.648	-0.546277	4.11842e-05	232.963	-0.279867	0.0414352	205.681	-0.397709	15-hydroxyprostaglandin dehydrogenase [NAD(+)]-like [Crassostrea gigas]	0.6805	response to external stimulus	GO:0044703;GO:0005737;GO:0016491;GO:0007165;GO:0055114;GO:0032501
CGI_10009620	-0.371343	0.00592922	251.589	-0.517703	4.40847e-06	277.696	-0.501597	2.21865e-05	271.168	-0.463548	poly [ADP-ribose] polymerase 12-like [Coturnix japonica]	0.6765	response to external stimulus	GO:0008152;GO:0003950;GO:0098586
CGI_10010105	-0.658857	5.15951e-20	1071.48	-0.340059	0.00194911	979.203	-0.594213	3.80901e-09	1067.17	-0.531043	ATP-dependent RNA helicase chloroplastic-like [Parasteatoda tepidariorum]	0.597	response to external stimulus	GO:0000166;GO:0046872;GO:0008152;GO:0004386;GO:0039528;GO:0098586;GO:0050776
CGI_10021601	-0.5962	1.80499e-07	1968.16	-0.359759	0.00152946	1856.75	-0.686463	1.74455e-18	2086.24	-0.547474	probable ATP-dependent RNA helicase DDX46	0.7525	response to external stimulus	GO:0003676;GO:0005524;GO:0008152;GO:0004386;GO:0039528;GO:0098586;GO:0050776
CGI_10028626	-0.513833	0.0301013	56.3434	-0.68272	0.00657395	63.5773	-0.463593	0.0498934	56.4151	-0.553382	Poly [ADP-ribose] polymerase 14	0.777	response to external stimulus	GO:0000166;GO:0003676;GO:0047961;GO:0005739;GO:0008152;GO:0016021;GO:0003950;GO:0098586
CGI_10007405	-0.606582	4.44173e-09	265.434	-0.723448	6.17408e-12	290.649	-0.42264	2.21207e-06	251.426	-0.584223	Poly [ADP-ribose] polymerase partial	0.62	response to external stimulus	GO:0008152;GO:0003950;GO:0098586
CGI_10014034	-1.07968	2.57507e-28	1213.9	-0.583265	4.74908e-07	1010.43	-0.457879	0.00804664	945.616	-0.706943	probable ATP-dependent RNA helicase DHX58	0.625	response to external stimulus	GO:0003677;GO:0005524;GO:0008152;GO:0004386;GO:0042981;GO:0039528;GO:0098586;GO:0050776
CGI_10008658	-0.824064	1.4034e-11	97.128	-0.326603	0.0381168	81.8877	-1.02316	5.22563e-15	109.336	-0.724608	poly [ADP-ribose] polymerase 15-like [Crassostrea gigas]	0.636	response to external stimulus	GO:0008152;GO:0003950;GO:0098586
CGI_10003585	-1.05542	1.42044e-12	62.7747	-0.803678	2.00286e-06	58.1681	-0.59675	0.00039856	52.0192	-0.818615	Proline-rich transmembrane 1	0.6005	response to external stimulus	GO:0009607;GO:0016021
CGI_10016615	-1.22966	6.77201e-07	41.4475	-1.33531	4.15041e-10	45.1383	-0.648217	0.0154432	31.5409	-1.07106	Exonuclease 3 -5 domain-containing 1	0.654	response to external stimulus	GO:0003676;GO:0008408;GO:0090305;GO:0098586
CGI_10017664	-1.72912	0.00019687	22.0516	-2.2327	3.90692e-07	30.3722	-2.50536	9.27012e-09	48.5061	-2.15573	helicase with zinc finger domain 2-like isoform X1 [Crassostrea gigas]	0.557	response to external stimulus	GO:0030374;GO:1903506;GO:0039528;GO:0098586;GO:0050776
CGI_10017663	-1.7958	0.000101227	19.5857	-4.03169	5.28103e-35	29.3487	-4.27347	9.11917e-39	37.1643	-3.36699	helicase with zinc finger domain 2-like isoform X1 [Crassostrea gigas]	0.7485	response to external stimulus	GO:0030374;GO:1903506;GO:0039528;GO:0098586;GO:0050776
CGI_10001591	-0.220311	0.00502948	379.571	-0.383723	1.51124e-05	420.888	-0.27445	0.000322478	396.028	-0.292828	AChain Crystal Structure Of An Inhibitor-bound Syk	0.64	response to external stimulus ; defense response ; response to stress	GO:0043408;GO:0080134;GO:0042991;GO:0005178;GO:0009653;GO:0048513;GO:0051050;GO:0060627;GO:0006468;GO:0044710;GO:0007159;GO:0038093;GO:0002366;GO:0051090;GO:0005524;GO:0051247;GO:0050870;GO:0018193;GO:0004715;GO:0001944;GO:0050878;GO:0051704;GO:1903530;GO:0042101;GO:0044444;GO:0004674;GO:0006897;GO:0006952;GO:0045579;GO:0005634;GO:0002429;GO:0010803;GO:0030593;GO:0031325;GO:0001819
CGI_10000695	1.66874	1.70353e-12	224.448	1.33469	4.71109e-11	249.655	1.98366	6.50673e-23	219.728	1.66236	E3 ubiquitin- ligase MIB2	0.4565	response to external stimulus ; protein modification by small protein conjugation or removal	GO:0004842;GO:0046872;GO:0016874;GO:0016567;GO:0098586;GO:0016567
CGI_10012420	0.777822	1.23067e-06	814.958	1.28688	4.88126e-23	754.935	2.64945	1.09059e-53	607.255	1.57139	E3 ubiquitin- ligase DTX3L-like	0.754	response to external stimulus ; protein modification by small protein conjugation or removal	GO:0008270;GO:0005509;GO:0098586;GO:0016567
CGI_10008596	0.385856	0.0256254	146.299	0.699938	3.37947e-05	138.952	0.849167	2.86438e-09	131.425	0.644987	E3 ubiquitin- ligase RGLG2-like	0.65	response to external stimulus ; protein modification by small protein conjugation or removal	GO:0008270;GO:0008152;GO:0016874;GO:0098586;GO:0016567
CGI_10012872	0.36824	0.00827892	195.824	0.40441	0.0010848	201.412	0.45234	0.000413481	195.086	0.40833	E3 ubiquitin- ligase TRIM33	0.5085	response to external stimulus ; protein modification by small protein conjugation or removal	GO:0008270;GO:0005622;GO:0098586;GO:0016567
CGI_10022450	0.344964	0.000109975	714.968	0.498385	4.24119e-11	710.17	0.239015	0.0221342	755.475	0.360788	E3 ubiquitin- ligase HECTD1	0.5835	response to external stimulus ; protein modification by small protein conjugation or removal	GO:0004842;GO:0046872;GO:0016874;GO:0016567;GO:0098586;GO:0016567
CGI_10028226	0.185302	0.000296919	1946.74	0.155145	0.000625815	2044.12	0.131084	0.0470309	2025.07	0.157177	E3 ubiquitin- ligase MGRN1-like isoform X2	0.8115	response to external stimulus ; protein modification by small protein conjugation or removal	GO:0008270;GO:0016020;GO:0098586;GO:0016567
CGI_10013040	-0.302661	0.000164446	1010.77	-0.224651	0.0100998	1020.43	-0.251198	0.000928529	1012.7	-0.259503	E3 ubiquitin- ligase TRIM33	0.5545	response to external stimulus ; protein modification by small protein conjugation or removal	GO:0098586;GO:0016567
CGI_10012437	-0.349671	9.633e-06	781.802	-0.208955	0.0139431	770.466	-0.286947	0.0032912	780.182	-0.281857	E3 ubiquitin- ligase HECTD1	0.598	response to external stimulus ; protein modification by small protein conjugation or removal	GO:0004842;GO:0046872;GO:0016874;GO:0016567;GO:0098586;GO:0016567
CGI_10026424	-0.262037	0.00689346	970.288	-0.377927	4.03868e-05	1055.44	-0.309953	0.00308826	1010.28	-0.316639	E3 ubiquitin- ligase Nedd-4 isoform X1 [Wasmannia auropunctata]	0.733	response to external stimulus ; protein modification by small protein conjugation or removal	GO:0004842;GO:0016874;GO:0016567;GO:0098586;GO:0016567
CGI_10012324	-0.428605	0.000399822	198.466	-0.295396	0.00471856	195.796	-0.487443	6.147e-07	207.766	-0.403815	E3 ubiquitin- ligase NEURL1B-like isoform X2 [Crassostrea gigas]	0.717	response to external stimulus ; protein modification by small protein conjugation or removal	GO:0008270;GO:0016021;GO:0098586;GO:0016567
CGI_10003188	-1.69164	0.000256915	2.8444	-1.42112	0.00285756	2.58878	-1.2365	0.00991547	2.13695	-1.44975	E3 ubiquitin- ligase KCMF1	0.8581	response to external stimulus ; protein modification by small protein conjugation or removal	GO:0008270;GO:0008152;GO:0016021;GO:0016874;GO:0098586;GO:0016567
CGI_10001309	-0.825609	0.0036408	70.6636	-1.78111	2.96297e-25	117.637	-2.01346	4.29929e-24	134.94	-1.54006	E3 ubiquitin- ligase DZIP3	0.7595	response to external stimulus ; protein modification by small protein conjugation or removal	GO:0008152;GO:0016874;GO:0098586;GO:0016567
CGI_10005981	-0.421823	0.0204013	70.5188	-1.94511	2.36864e-35	157.134	-1.09847	3.8197e-10	98.3306	-1.15513	Ribosomal RNA-processing 8	0.7595	response to external stimulusresponse to stress	GO:0003676;GO:0000183;GO:0035064;GO:0033553;GO:0046015;GO:0005730;GO:0008757;GO:0005677;GO:0042149;GO:0032259
CGI_10026681	-0.428647	2.06982e-05	39214	-0.341116	0.000647319	39372.7	-0.375148	1.54632e-06	39194.2	-0.381637	polyubiquitin [Salmo salar]	0.999	response to external stimulusresponse to stressprotein modification by small protein conjugation or removal	GO:0043209;GO:0007141;GO:0060613;GO:0002020;GO:0007144;GO:0008585;GO:0021888;GO:0005654;GO:0044822;GO:0005615;GO:0070062;GO:0005737;GO:0072520;GO:0097009;GO:0010992;GO:0019985;GO:0098586;GO:0016567
CGI_10009321	2.02827	1.90131e-22	70.6942	1.54921	4.84264e-12	79.1147	1.98915	4.65038e-21	72.5196	1.85554	ankyrin repeat domain-containing 32 [Canis lupus familiaris]	0.731	response to stress	GO:1990166;GO:0034184;GO:0005856;GO:0035861;GO:0006974;GO:2000781;GO:0031334
CGI_10019210	1.47976	1.29556e-08	319.77	1.14188	1.28396e-07	359.606	1.73684	3.15522e-15	315.032	1.45283	transformation transcription domain-associated -like	0.8545	response to stress	GO:0005634;GO:0006281;GO:0016021;GO:0016310;GO:0016773;GO:0016301
CGI_10012306	1.18044	9.63451e-15	93.2538	1.05806	1.27699e-15	99.8085	1.47428	1.74482e-13	89.431	1.23759	Eosinophil peroxidase	0.664	response to stress	GO:0004601;GO:0006979;GO:0016021;GO:0098869;GO:0055114;GO:0020037;GO:0006979
CGI_10012307	0.624545	0.000361508	200.39	1.07518	1.33919e-17	186.522	1.43789	3.34762e-18	169.483	1.04587	myeloperoxidase-like [Crassostrea gigas]	0.7095	response to stress	GO:0004601;GO:0006979;GO:0016021;GO:0098869;GO:0055114;GO:0020037
CGI_10011544	0.829754	4.05489e-08	81.8299	0.8777	9.294e-09	83.9677	0.825146	4.01064e-09	83.7997	0.8442	Heat shock 70 kDa 12B	0.698	response to stress	GO:0016020;GO:0006950
CGI_10007818	0.784873	2.24371e-12	231.703	0.927427	1.05343e-15	232.465	0.708678	2.66282e-10	241.737	0.806992	heat shock 70 kDa 12A-like	0.6575	response to stress	GO:0006950
CGI_10015846	0.753808	2.58646e-07	345.041	0.64389	2.92893e-09	370.529	0.899567	3.32504e-20	341.002	0.765755	tumorous imaginal mitochondrial-like isoform X1	0.736	response to stress	GO:0005524;GO:0031072;GO:0009408;GO:0046872;GO:0005739;GO:0051082;GO:0042981;GO:0006457;GO:0007005
CGI_10013528	0.384554	0.000215347	1450.29	1.1529	5.95354e-35	1236.13	0.566752	4.25183e-06	1403.8	0.701403	heat shock 70 kDa 12A-like [Crassostrea gigas]	0.804	response to stress	GO:0005524;GO:0006950
CGI_10008894	0.483215	0.00776473	238.973	0.702647	7.16902e-05	233.3	0.773007	3.23767e-08	225.924	0.652956	double-strand break repair MRE11A [Oryctolagus cuniculus]	0.802	response to stress	GO:0008283;GO:0007062;GO:0007095;GO:0090305;GO:0035861;GO:0016605;GO:0008022;GO:0004003;GO:0006303;GO:0007129;GO:0000784;GO:0000014;GO:0003677;GO:0008408;GO:0031954;GO:0032508;GO:0030145;GO:0033674;GO:0030870;GO:0031573;GO:0032876
CGI_10002491	0.379172	0.000363629	315.528	0.975563	6.47393e-10	278.204	0.45045	1.37417e-05	315.542	0.601728	heat shock 70 kDa 12B-like [Crassostrea gigas]	0.6255	response to stress	GO:0006950
CGI_10014382	0.690317	0.000124911	106.586	0.456324	0.0115648	118.466	0.443111	0.00766463	116.992	0.529918	glutathione S-transferase theta-2-like [Biomphalaria glabrata]	0.6855	response to stress	GO:0008152;GO:0016740;GO:0006979
CGI_10019057	0.604784	4.61216e-13	658.481	0.288745	0.0202132	750.991	0.463928	1.12374e-05	699.876	0.452486	disulfide-isomerase A4	0.736	response to stress	GO:0003756;GO:0008152;GO:0005783;GO:0045454;GO:0006457;GO:0034976
CGI_10016533	0.722961	8.3371e-11	133.677	0.308887	0.0119684	156.662	0.316874	0.0112346	153.551	0.449574	alkylated DNA repair alkB homolog 1	0.589	response to stress	GO:0006281;GO:0016491;GO:0055114
CGI_10023132	0.622054	7.24261e-06	194.072	0.289706	0.0148802	223.185	0.322712	0.0272605	216.594	0.411491	methionine-R-sulfoxide reductase mitochondrial	0.809	response to stress	GO:0030091;GO:0006979;GO:0055114;GO:0033743
CGI_10013531	0.2243	0.00464703	486.999	0.543463	2.72229e-11	459.802	0.439938	1.0538e-06	465.257	0.402567	heat shock 70 kDa 12A-like	0.7745	response to stress	GO:0006950
CGI_10015916	0.359864	8.30822e-08	3064.25	0.24821	0.0303341	3296.76	0.516586	7.09931e-05	2982.53	0.374886	Calreticulin	0.8805	response to stress	GO:0007050;GO:0033144;GO:0008284;GO:0090398;GO:0009897;GO:0045665;GO:0045787;GO:0005178;GO:0045740;GO:0005844;GO:0000122;GO:0030866;GO:0005788;GO:0070062;GO:0005925;GO:0005509;GO:0048387;GO:2000510;GO:0005829;GO:0003729;GO:0001948;GO:0030246;GO:0034504;GO:0042824;GO:0040020;GO:0051082;GO:1900026;GO:0006457;GO:0006611;GO:0005634;GO:0005615;GO:0048471;GO:0031625;GO:0002502;GO:0050681;GO:0010628;GO:…
CGI_10021421	-0.15555	0.0388939	612.103	-0.175944	0.0169919	641.294	-0.232004	0.000649616	643.526	-0.187833	ATPase WRNIP1	0.716	response to stress	GO:0043229;GO:0003677;GO:0005524;GO:0006281;GO:0006260;GO:0004386
CGI_10018220	-0.286903	0.002089	1431.18	-0.156674	0.0359005	1416.59	-0.163344	0.0148682	1395.45	-0.202307	DNA-directed RNA polymerases and III subunit partial	0.8315	response to stress	GO:0045815;GO:0006361;GO:0006383;GO:0006362;GO:0006370;GO:0032481;GO:0006283;GO:0008543;GO:0006363;GO:0042795;GO:0005666;GO:0006367;GO:0005665;GO:0000398;GO:0006368;GO:0001056;GO:0003677;GO:0005736;GO:0001055;GO:0001054;GO:0035019;GO:0005829;GO:0031047;GO:0050434
CGI_10011748	-0.39072	0.00353869	640.401	-0.321185	0.037241	648.197	-0.31453	0.0196301	634.784	-0.342145	solute carrier family 12 member 4-like isoform X3	0.806	response to stress	GO:0015379;GO:0005887;GO:1902476;GO:0071477
CGI_10008877	-0.439418	9.75399e-07	5859.18	-0.200237	0.0141293	5549.5	-0.420109	7.75838e-05	5945.16	-0.353255	peroxiredoxin 6	0.829	response to stress	GO:0004601;GO:0098869;GO:0055114;GO:0051920;GO:0006979
CGI_10004893	-0.353625	0.00830894	299.599	-0.307394	0.0299488	305.872	-0.491715	0.000125907	323.909	-0.384245	BRCA1-A complex subunit BRE	0.706	response to stress	GO:0045739;GO:0086013;GO:0060047;GO:0031593;GO:0008016;GO:0060307;GO:0006302;GO:0005249;GO:0005737;GO:0070552;GO:0016021;GO:0070531;GO:0031572;GO:0010212
CGI_10024450	-0.324912	0.00126181	237.692	-0.617313	1.67504e-12	278.525	-0.323922	0.0012831	242.889	-0.422049	EP300-interacting inhibitor of differentiation 3-like	0.7255	response to stress	GO:0005634;GO:0006281;GO:0030915;GO:0016021
CGI_10022078	-0.371427	0.000729224	304.269	-0.662011	5.60523e-15	356.525	-0.257663	0.0277734	297.752	-0.430367	heat shock 70 kDa 12B-like [Crassostrea gigas]	0.6345	response to stress	GO:0006950
CGI_10003765	-0.340877	0.0365617	700.017	-0.759969	1.30677e-07	869.527	-0.504332	0.00142756	765.422	-0.535059	Thioredoxin-1 [Candida glabrata]	0.7905	response to stress	GO:0015035;GO:0005737;GO:0006662;GO:0016671;GO:0034599;GO:0045454;GO:0055114;GO:0006457;GO:0000103;GO:0006979
CGI_10003806	-0.593437	0.000474927	473.312	-0.490724	0.000639845	470.095	-0.551806	0.000300894	474.293	-0.545322	heat shock 70 kDa 12A-like [Crassostrea gigas]	0.626	response to stress	GO:0006950
CGI_10015035	-0.480329	0.00467373	113.221	-0.605994	6.72941e-06	123.785	-0.621159	9.33727e-07	122.489	-0.569161	Heat shock 70 kDa 12B	0.738	response to stress	GO:0016020;GO:0006950
CGI_10003797	-0.553225	1.27091e-05	137.059	-0.629138	5.25967e-07	147.068	-0.56854	4.04258e-06	140.691	-0.583634	Hepatic leukemia factor	0.782	response to stress	GO:0042415;GO:0030097;GO:0048878;GO:0051173;GO:0043565;GO:0046983;GO:0006357;GO:0005634;GO:0006979;GO:0003700;GO:0001666;GO:0031328;GO:0035914;GO:0033554;GO:0070887
CGI_10026620	-0.610487	0.00402845	133.988	-0.766596	8.73092e-07	148.462	-0.479427	0.0134811	128.94	-0.618837	COBW domain-containing 1-like	0.907	response to stress	GO:0006950
CGI_10000033	-0.510252	0.000146957	3843.87	-0.61657	4.44378e-07	4178.06	-0.738905	3.69982e-09	4333.18	-0.621909	40S ribosomal S3 [Salmo salar]	0.9375	response to stress	GO:2001272;GO:0006281;GO:0043009;GO:0043507;GO:0022627;GO:1902231;GO:1901224;GO:0007059;GO:0005730;GO:0051092;GO:0005844;GO:0097100;GO:0051225;GO:0070062;GO:0005925;GO:0072686;GO:0032587;GO:0003729;GO:0071159;GO:0031397;GO:0070301;GO:0031116;GO:0017148;GO:0030544;GO:0045739;GO:0019901;GO:0032183;GO:0042769;GO:0045738;GO:0061481;GO:1902546;GO:0070181;GO:0005743;GO:0008017;GO:0008534;GO:0006412;GO:…
CGI_10000124	-0.822686	3.5977e-12	326.108	-0.352571	0.00297051	277.565	-0.872809	1.91764e-14	340.889	-0.682689	glutathione S-transferase class mu	0.855	response to stress	GO:0008152;GO:0004364;GO:0006979
CGI_10004986	-1.2602	1.40316e-06	30.3073	-0.781198	0.00541108	24.482	-0.693006	0.0209201	23.2023	-0.911468	heat shock 70 kDa 12A-like	0.778	response to stress	GO:0006950
CGI_10019738	-0.492804	0.0443262	69.2976	-0.885114	2.03737e-05	86.0897	-1.55903	1.13963e-20	118.432	-0.978983	Heat shock Hsp20 domain containing	0.613	response to stress	GO:0006950
CGI_10022586	-1.59594	4.46423e-50	273.301	-1.0053	7.62084e-15	212.078	-0.559054	1.17328e-05	170.246	-1.05343	heat shock 70 kDa 12A-like [Crassostrea gigas]	0.634	response to stress	GO:0006950
CGI_10009915	-1.79945	4.509e-15	190.549	-0.710227	0.000844547	109.614	-0.671703	3.27553e-05	105.354	-1.06046	glutathione S-transferase Mu 3-like	0.839	response to stress	GO:0008152;GO:0004364;GO:0006979
CGI_10027140	-1.74625	3.64132e-09	14.511	-0.786612	0.0325627	8.80856	-1.04816	0.00225381	10.0145	-1.19367	heat shock 70 kDa 12A-like [Crassostrea gigas]	0.6285	response to stress	GO:0006950
CGI_10009427	-1.25884	1.84112e-10	33.3029	-0.880749	7.67631e-05	28.8296	-1.89726	3.4172e-22	48.7589	-1.34562	Heat shock 70 kDa 12A	0.725	response to stress	GO:0016021;GO:0006950
CGI_10012308	-0.810652	0.0211654	12.3819	-0.824345	0.0486964	13.6214	-2.54338	3.87587e-12	48.0141	-1.39279	myeloperoxidase-like [Crassostrea gigas]	0.673	response to stress	GO:0004601;GO:0006979;GO:0016021;GO:0098869;GO:0055114;GO:0020037
CGI_10015709	-1.41631	1.00528e-10	30.8869	-1.04219	6.92559e-06	26.403	-1.97194	4.99576e-25	42.952	-1.47681	heat shock 70 kDa 12A-like	0.711	response to stress	GO:0016021;GO:0006950
CGI_10001816	-1.57246	1.05243e-06	23.3008	-1.61799	4.35567e-10	23.4516	-1.3154	4.10689e-06	19.5759	-1.50195	Heat shock 70 kDa 12A	0.739	response to stress	GO:0006950
CGI_10028167	-1.07266	0.000187115	66.6261	-2.10042	7.92302e-17	125.889	-1.6101	3.90385e-09	92.8246	-1.59439	78 kDa glucose-regulated	0.7355	response to stress	GO:0005524;GO:0006950
CGI_10011417	-2.17153	3.45019e-70	126.446	-2.6816	5.43839e-79	181.464	-1.06282	9.33259e-13	71.9009	-1.97198	heat shock 70 kDa 12B-like [Crassostrea gigas]	0.643	response to stress	GO:0006950
CGI_10024239	3.55149	4.79851e-44	144.553	3.88316	3.29812e-52	148.215	4.05597	8.49269e-52	144.444	3.83021	Alpha-2C adrenergic receptor	0.8033		unknown
CGI_10008214	2.51811	3.98533e-13	12.7887	3.68305	1.14422e-20	12.0649	3.43245	5.28191e-19	12.0097	3.2112	B(0,+)-type amino acid transporter 1	0.8864		GO:0046872;GO:0006508;GO:0006915;GO:0004197
CGI_10003549	0.897761	0.000727824	4842.44	8.01327	0	3352.33	0.604197	0.00679914	5393.67	3.17174	Collagen alpha-1(XIV) chain [Crassostrea gigas]	0.505		GO:0008061;GO:0005581;GO:0006030;GO:0005576
CGI_10004677	3.25087	3.0922e-14	42.0871	3.57043	3.88912e-21	44.5264	2.67032	1.03204e-09	43.4476	3.16387	hypothetical protein CGI_10004677	0.68		unknown
CGI_10001496	0.626633	0.000986325	387.627	7.27786	8.78171e-123	246.617	1.55644	3.3518e-05	303.157	3.15365	glycine-rich cell wall structural -like	0.624		unknown
CGI_10008595	3.26944	2.70049e-51	85.061	3.3143	1.64439e-60	88.396	2.47922	6.35282e-37	92.97	3.02099	sodium- and chloride-dependent creatine transporter 1 isoform X1	0.732		GO:0005887;GO:0006836;GO:0005328;GO:0005309;GO:1902598
CGI_10013453	3.28187	4.3509e-30	73.7957	2.93487	4.92852e-27	78.7095	2.72648	7.24462e-18	77.7057	2.98107	Gamma-aminobutyric acid receptor subunit gamma-2	0.679		GO:0034220;GO:0016021;GO:0005230
CGI_10025744	3.1057	1.3444e-17	11.9282	2.5835	7.45518e-15	13.1182	3.23464	6.3815e-19	12.0692	2.97461	cell adhesion molecule 3-like isoform X2	0.5825		GO:0016021
CGI_10001427	3.29291	3.22891e-15	106.132	3.87693	1.1852e-74	113.949	1.66001	1.39372e-18	137.569	2.94328	muscle M-line assembly unc-89-like	0.597		unknown
CGI_10013796	3.61557	2.31557e-21	106.538	1.52979	7.3593e-05	134.763	3.6824	7.49258e-20	107.469	2.94259	Williams-Beuren syndrome chromosomal region 27 -like	0.7035		unknown
CGI_10028373	1.14521	8.60243e-10	89.6522	3.0496	1.16733e-42	71.4951	4.56358	7.2659e-59	65.3988	2.91946	hypothetical protein CGI_10028373	0.7655		unknown
CGI_10024014	4.19672	4.42815e-29	21.5807	0.746653	0.00279793	34.98	3.48214	5.98299e-25	22.8072	2.80851	hypothetical protein CGI_10024014	1		unknown
CGI_10020644	1.82853	2.55053e-05	234.216	3.0397	7.72373e-41	234.512	3.51452	2.40341e-49	223.574	2.79425	Polycystic kidney disease 1-like 2	0.5445		GO:0005509;GO:0016021
CGI_10021723	3.07915	1.17038e-13	14.3069	2.43443	5.04319e-10	15.8831	2.68601	1.29338e-11	15.1873	2.7332	hypothetical protein CGI_10021723	0.5215		GO:0016021
CGI_10006643	3.16046	4.00816e-19	28.5928	3.04621	2.43905e-19	30.088	1.90064	1.3062e-10	33.649	2.70244	hypothetical protein CGI_10006643	0.5905		GO:0003676
CGI_10019116	3.09221	1.91249e-16	12.8729	2.89869	8.10953e-16	13.6689	1.89275	1.26027e-08	15.0985	2.62789	hypothetical protein CGI_10019116	0.7044		unknown
CGI_10002400	2.95111	5.47405e-21	22.1704	1.92747	3.13536e-12	25.9677	2.89528	7.92785e-21	22.8284	2.59128	Coiled-coil domain-containing 25	0.545		unknown
CGI_10022363	3.35308	1.50812e-26	36.6251	1.91885	9.19894e-10	43.4175	2.37881	2.29496e-14	40.3192	2.55025	hypothetical protein CGI_10022363	0.6983		unknown
CGI_10006828	2.18274	4.12694e-09	125.381	2.60984	9.38256e-18	127.945	2.83009	2.06984e-26	124.552	2.54089	hemicentin-1 [Culex quinquefasciatus]	0.621		unknown
CGI_10000327	4.07445	3.61339e-53	68.2051	1.84593	6.19127e-21	85.8671	1.54396	2.02656e-16	88.702	2.48811	receptor-type tyrosine- phosphatase S-like	0.7885		GO:0004725;GO:0016020;GO:0035335
CGI_10000752	3.01457	5.98361e-19	14.068	0.893185	0.000358267	20.6889	3.50345	4.14143e-22	13.8563	2.4704	hypothetical protein CGI_10000752	1		unknown
CGI_10002398	2.50414	1.21102e-13	12.82	1.8487	5.31409e-10	14.7543	2.47293	1.84722e-14	13.217	2.27526	[Nematostella vectensis]	0.6635		unknown
CGI_10028733	1.40059	3.11775e-11	59.3722	3.03643	4.95321e-27	49.6433	2.32643	4.94663e-23	52.4665	2.25448	THAP domain-containing 4	0.639		GO:0003676
CGI_10018429	1.39777	2.9671e-07	105.63	3.30208	4.26039e-31	87.8128	1.96481	4.03292e-23	99.4294	2.22155	cartilage matrix -like	0.6415		GO:0005581;GO:0016021
CGI_10019346	2.87116	1.68169e-13	18.4514	1.6881	2.59445e-06	22.3205	2.00741	2.30311e-08	20.8708	2.18889	Fucolectin	0.818		GO:0016021
CGI_10017560	0.839482	0.000139045	69.5304	3.17409	1.87852e-36	51.1453	2.43338	1.38482e-23	53.4474	2.14899	hypothetical protein CGI_10017560	0.9		GO:0016021
CGI_10009241	2.59654	2.30284e-09	4.93242	2.42106	1.42539e-08	5.29833	1.3797	0.000499052	6.35334	2.13243	hypothetical protein CGI_10009241	0.7155		GO:0008270
CGI_10003513	1.31488	0.00158113	34.6589	2.4676	7.33247e-11	30.7222	2.61219	2.63768e-12	29.8733	2.13156	hypothetical protein CGI_10003513	1		unknown
CGI_10000921	2.08224	3.17537e-07	6.17653	1.88041	1.84108e-06	6.67006	2.41094	2.94037e-09	6.05755	2.12453	serine-enriched -like isoform X1 [Stomoxys calcitrans]	0.609		unknown
CGI_10025990	1.86078	9.02832e-08	27.2008	1.68987	3.88256e-07	29.2309	2.5808	8.24799e-13	25.3395	2.04382	PREDICTED: uncharacterized protein LOC105345677 [Crassostrea gigas]	0.7533		unknown
CGI_10012876	2.85356	1.90254e-24	41.9449	1.85784	2.91114e-13	49.0587	1.39683	8.75307e-09	52.2575	2.03608	hypothetical protein CGI_10012876	0.6185		unknown
CGI_10002399	2.46891	1.54995e-10	8.15695	2.21417	1.82562e-09	8.76634	1.41054	3.74543e-05	9.96342	2.03121	hypothetical protein CGI_10002399	0.697		unknown
CGI_10013804	2.34062	1.28575e-22	198.71	0.401564	0.0369452	308.924	3.31909	1.33784e-78	189.167	2.02043	COBW domain-containing 5	0.8268		GO:0016021
CGI_10021660	2.19652	1.28323e-06	4.49688	1.82303	6.46066e-05	5.05886	1.99067	9.7712e-06	4.83965	2.00341	ferritin	0.932		GO:0006879;GO:0008199;GO:0005737;GO:0006826;GO:0055114;GO:0004322
CGI_10011506	0.741701	0.00257232	46.0631	3.27803	4.09884e-30	32.5718	1.86249	3.57152e-14	37.0699	1.96074	THAP domain-containing 4	0.779		GO:0003676;GO:0016021
CGI_10000268	2.22081	2.10185e-08	7.46244	1.45557	0.000401839	8.72067	2.1612	1.22089e-07	7.57551	1.94586	Eukaryotic translation initiation factor 4E	0.902		GO:0006417;GO:0003743;GO:0005845;GO:0005515;GO:0016281;GO:0006413
CGI_10015039	2.74094	2.16096e-23	31.9906	1.15294	5.25967e-07	42.4454	1.82984	8.57003e-15	36.6632	1.90791	multiple epidermal growth factor-like domains 10	0.669		unknown
CGI_10021089	2.82025	1.02163e-16	15.8441	0.995749	0.000140611	22.3533	1.86853	1.18749e-10	18.319	1.89484	PREDICTED: uncharacterized protein LOC105345424	0.6063		unknown
CGI_10012362	1.85028	5.52223e-05	3.35186	1.90478	2.95997e-05	3.48402	1.80926	7.54698e-05	3.49773	1.85477	hypothetical protein CGI_10012362	0.9033		GO:0016021
CGI_10006814	1.90412	3.20156e-14	68.0624	2.3496	3.3852e-22	67.0092	1.30571	6.57392e-09	77.6951	1.85314	hypothetical protein CGI_10006814	0.7845		unknown
CGI_10008135	1.50802	0.000474446	7.37838	2.64961	6.61246e-10	6.48784	1.39523	0.000798838	7.81837	1.85096	receptor-type tyrosine- phosphatase kappa-like	0.6795		unknown
CGI_10010078	1.43615	9.56883e-32	192.089	2.22234	4.82558e-67	176.899	1.84219	1.5928e-59	183.414	1.83356	Carcinoembryonic antigen-related cell adhesion molecule 5	0.6745		GO:0016021
CGI_10020101	1.93599	2.51221e-09	12.4769	1.58005	2.60149e-07	13.8106	1.94688	9.37204e-09	12.6168	1.82098	PREDICTED: uncharacterized protein LOC105327882 [Crassostrea gigas]	0.62		unknown
CGI_10010502	1.8512	2.58646e-07	9.38658	1.83736	2.11818e-07	9.82331	1.72805	4.5601e-07	9.89117	1.80553	hypothetical protein CGI_10010502	1		unknown
CGI_10028552	1.20079	0.0142399	3.33163	2.16952	1.58818e-06	2.97575	2.01838	7.77545e-06	2.99917	1.79623	Proton myo-inositol cotransporter	0.8235		GO:0022891;GO:0055085;GO:0016021
CGI_10011657	2.37022	6.05658e-19	31.7728	1.33291	2.361e-11	39.4192	1.66208	1.32396e-10	35.8624	1.7884	hypothetical protein CGI_10011657	0.5715		unknown
CGI_10004105	2.33445	3.49317e-09	293.998	2.322	1.65053e-34	326.427	0.665571	4.9923e-10	441.015	1.77401	PREDICTED: uncharacterized protein LOC105320535 [Crassostrea gigas]	0.6725		unknown
CGI_10014078	1.66793	4.92346e-06	15.4018	1.94125	1.45148e-07	15.2477	1.6841	4.74977e-06	15.6079	1.76443	hypothetical protein CGI_10014078	1		GO:0016021
CGI_10025930	1.7273	2.64156e-22	80.6615	2.15126	6.25979e-32	78.929	1.36359	1.53358e-14	88.0997	1.74738	hypothetical protein CGI_10025930	0.99		unknown
CGI_10016912	2.26816	2.35351e-17	27.1549	1.05935	6.03701e-06	35.0602	1.90093	6.364e-14	29.2678	1.74281	Laminin subunit alpha-1	0.86		GO:0016021
CGI_10017390	1.4302	0.00147663	4.29011	1.88138	1.82784e-05	4.10333	1.91296	1.47766e-05	3.9769	1.74152	enhancer of split m7 -like	0.78		GO:0005634;GO:0003677;GO:0006351;GO:0006355;GO:0046983
CGI_10002609	1.40259	0.00331081	7.74145	2.01698	9.54728e-06	7.18666	1.78452	9.9606e-05	7.29048	1.7347	PREDICTED: uncharacterized protein LOC105348408 [Crassostrea gigas]	0.7067		unknown
CGI_10021371	1.55568	1.98266e-05	27.0132	1.68744	1.33158e-05	27.0262	1.95718	8.74071e-08	25.7276	1.73343	cysteine-rich motor neuron 1 -like	0.445		GO:0004867;GO:0010951
CGI_10020226	0.772306	4.60052e-07	363.665	0.416228	0.0392934	417.505	3.99837	7.23821e-90	248.137	1.72897	hypothetical protein CGI_10020226	0.7505		unknown
CGI_10014347	1.15977	0.0102993	4.29371	2.31445	2.40014e-07	3.41639	1.71162	0.00013753	3.75286	1.72861	slit homolog 1 -like	0.766		GO:0016021
CGI_10000305	2.38005	1.11168e-07	3.91675	1.77475	7.1559e-05	4.57216	1.00027	0.0209078	5.51905	1.71835	hypothetical protein CGI_10000305	0.9157		unknown
CGI_10006338	1.1708	4.86027e-09	53.5637	1.77149	2.54124e-19	49.7156	2.12829	1.59428e-25	46.3451	1.6902	Voltage-gated hydrogen channel 1	0.568		unknown
CGI_10022303	1.46561	0.00150193	4.39252	1.80374	6.4367e-05	4.2763	1.72813	0.00013454	4.23263	1.66583	ankyrin repeat [Trichomonas vaginalis G3]	0.4925		unknown
CGI_10006815	2.1939	6.44727e-20	81.2907	1.24279	4.13035e-06	98.4018	1.5423	5.02778e-17	92.4797	1.65966	forkhead box K2	0.6265		GO:0003700;GO:0043231;GO:0005488
CGI_10019998	1.40104	0.00163457	4.43884	1.97589	7.85394e-06	4.09226	1.53551	0.000586651	4.35021	1.63748	oligodendrocyte transcription factor 2	0.7015		GO:0003700;GO:0001764;GO:0021548;GO:0021522;GO:0006355;GO:0046983;GO:0042552;GO:0021778;GO:0048468;GO:0001709;GO:0048857
CGI_10026081	1.53796	3.67619e-09	28.9751	2.11485	1.09609e-11	27.1776	1.16869	3.28523e-07	32.1948	1.60716	deoxyribonuclease TATDN2	0.632		GO:0016788;GO:0046872;GO:0008152
CGI_10025631	0.81489	3.86792e-05	75.7985	1.84638	3.02482e-20	63.768	2.06427	3.71065e-29	60.9282	1.57518	hypothetical protein CGI_10025631	0.825		unknown
CGI_10012660	1.23084	0.00774315	3.61217	1.85335	4.27878e-05	3.21084	1.62906	0.000294063	3.3251	1.57108	---NA---	0		unknown
CGI_10014067	1.84691	2.87603e-05	10.5728	1.55368	0.000391407	11.6759	1.30301	0.00263878	12.2167	1.56787	THAP domain-containing 4	0.7722		GO:0003676;GO:0006353;GO:0016884
CGI_10015336	0.419436	0.0272226	76.6046	2.59012	4.2019e-41	52.6907	1.6584	1.4848e-23	58.7221	1.55598	eukaryotic translation initiation factor 3 subunit A-like isoform X1	0.9513		GO:0003743;GO:0001731;GO:0016282;GO:0033290;GO:0006446;GO:0005852
CGI_10020939	1.00315	0.0368063	38.7023	1.30423	0.000152143	40.3483	2.34333	1.34482e-10	33.2168	1.55024	stabilizer of axonemal microtubules 2-like	0.4855		unknown
CGI_10028404	1.59286	5.14951e-25	376.433	1.5639	1.12614e-19	392.503	1.48988	4.22102e-31	392.981	1.54888	hypothetical protein CGI_10028404	1		unknown
CGI_10023668	2.52337	7.52265e-09	4.51964	1.03516	0.0157732	6.33063	1.06787	0.0102269	6.16082	1.54213	Sterile alpha and TIR motif-containing 1	1		GO:0007165
CGI_10000293	0.636647	1.98517e-07	177.554	1.32062	6.38473e-16	156.141	2.66139	2.42402e-33	125.936	1.53955	Coatomer subunit beta partial	0.9075		GO:0005080;GO:0006888;GO:0006890;GO:0005198;GO:0006891;GO:0006886;GO:1901998;GO:0030126
CGI_10015526	1.68345	0.000312901	44.3506	1.31892	0.00616532	49.6168	1.57565	0.000707308	46.3854	1.52601	PREDICTED: uncharacterized protein LOC105327700 [Crassostrea gigas]	0.7233		GO:0016021
CGI_10023170	1.61942	0.000557388	4.12316	1.56827	0.000838401	4.34717	1.38333	0.00337653	4.53486	1.52367	c-binding -like	0.736		unknown
CGI_10017053	1.44364	0.000702336	5.62534	1.778	3.36367e-05	5.39698	1.33686	0.00120377	5.93328	1.5195	GTP-binding GEM-like isoform X1 [Polistes canadensis]	0.5695		GO:0005525;GO:0007264;GO:0016020;GO:0015031;GO:0005622
CGI_10003524	0.997971	1.93753e-07	153.406	1.58347	1.9643e-25	141.994	1.9508	1.12576e-25	131.072	1.51075	dimethylhistidine N-methyltransferase	0.4995		unknown
CGI_10022894	1.24377	4.26239e-08	42.0694	1.43565	2.12462e-10	42.0652	1.81883	3.18365e-12	38.3341	1.49942	solute carrier family 25 member 35	0.721		GO:0016021;GO:0006810
CGI_10003610	1.90448	3.44423e-05	2.43492	1.35545	0.00396985	3.01167	1.21141	0.0104029	3.06437	1.49045	hypothetical protein CGI_10003610	1		unknown
CGI_10023916	1.49171	0.00152661	3.51975	1.4418	0.00223136	3.69868	1.53624	0.000910845	3.56705	1.48992	hypothetical protein CGI_10023916	0.9733		unknown
CGI_10022622	1.70372	0.000246544	3.38914	1.38869	0.00325884	3.82084	1.33493	0.00451241	3.80559	1.47578	Neuronal acetylcholine receptor subunit alpha-6	0.6925		GO:0034220;GO:0016021;GO:0005230
CGI_10011446	1.61765	0.000524316	2.7604	1.49079	0.00130647	3.01276	1.30797	0.00529487	3.08201	1.47214	hypothetical protein CGI_10011446	0.76		unknown
CGI_10013949	2.09179	7.09368e-16	24.0094	0.944931	0.00037937	30.8585	1.35888	4.33703e-07	27.4893	1.4652	---NA---	0		unknown
CGI_10021768	1.84132	2.61309e-07	9.32764	0.945306	0.00369732	11.9177	1.56272	7.60454e-06	10.0654	1.44978	PREDICTED: uncharacterized protein LOC105326080	0.684		unknown
CGI_10002031	1.74991	6.6936e-05	4.03162	1.51368	0.000383133	4.47396	1.07282	0.0166629	4.84311	1.44547	hypothetical protein CGI_10002031	0.7275		unknown
CGI_10011250	2.10561	7.44785e-13	30.9297	1.44112	8.97647e-08	36.0179	0.774191	0.00715294	41.2973	1.44031	sporulation-specific 15-like isoform X1	0.7658		unknown
CGI_10014696	1.26017	4.01856e-11	51.6427	0.942003	0.000185224	57.1906	2.10703	1.19305e-21	45.4546	1.4364	Serum paraoxonase arylesterase 1	0.7095		GO:0005615;GO:0004064;GO:0044237;GO:0071704
CGI_10001862	2.06569	3.53171e-09	11.5103	1.45263	4.59241e-06	13.4354	0.771885	0.0461628	15.2791	1.43007	hypothetical protein CGI_10001862	0.7392		unknown
CGI_10001130	0.888873	6.82485e-16	141.497	2.21908	9.16857e-50	115.386	1.17542	4.26965e-27	135.298	1.42779	glyoxylate hydroxypyruvate reductase A-like isoform X3 [Cephus cinctus]	0.629		GO:0051287;GO:0016020;GO:0055114
CGI_10009366	0.688678	0.000338689	52.7981	1.6059	1.04659e-13	44.6085	1.97332	9.55394e-23	41.4485	1.42263	hypothetical protein CGI_10009366	1		unknown
CGI_10013980	1.23452	2.28626e-30	304.467	1.43457	3.86041e-45	304.351	1.57608	2.90413e-61	291.676	1.41505	probable D-tyrosyl-tRNA(Tyr) deacylase 2	0.7385		GO:0051500;GO:0005737;GO:0006450;GO:0002161;GO:0006399;GO:0019478
CGI_10018249	1.74359	6.46353e-05	4.55136	1.54532	0.000249137	5.00948	0.937772	0.0249546	5.80182	1.4089	tigger transposable element-derived 4-like	0.8667		unknown
CGI_10011436	1.71315	3.45172e-30	126.414	2.18833	1.61654e-19	121.079	0.324006	0.00744826	179.217	1.4085	Myeloid leukemia factor partial	0.6605		unknown
CGI_10002714	0.8198	6.95854e-05	82.8066	1.81845	5.25527e-15	69.7644	1.53163	4.63729e-12	72.096	1.38996	N-lysine methyltransferase SETD8-A-like isoform X1	0.7035		GO:0008168;GO:0032259
CGI_10021289	1.83335	3.01379e-11	18.7823	0.866491	0.000890173	23.9992	1.46704	6.31269e-09	20.5671	1.38896	tissue factor pathway inhibitor-like	0.638		GO:0004867;GO:0010951
CGI_10013492	1.37406	1.01966e-33	203.921	1.76466	1.36978e-32	197.295	1.01977	2.6979e-10	223.884	1.38617	Transposable element Tcb2 transposase	0.6465		GO:0016021
CGI_10013279	1.95527	1.04739e-13	58.8556	1.38822	9.99685e-07	67.0429	0.812341	0.00608918	75.5514	1.38528	hypothetical protein CGI_10013279	1		unknown
CGI_10024190	1.89236	3.48586e-12	41.2792	0.752386	0.0131235	54.4422	1.50494	1.61013e-11	45.547	1.38323	Organic cation transporter	0.647		GO:0055085;GO:0022857;GO:0016021
CGI_10013608	1.68912	5.60103e-66	521.353	1.17264	1.0402e-42	598.246	1.28153	3.01583e-25	573.017	1.38109	PREDICTED: uncharacterized protein LOC105335831	0.699		unknown
CGI_10026264	1.28334	0.00209827	6.51467	1.5151	0.000248209	6.44683	1.34361	0.000911902	6.59063	1.38068	PREDICTED: uncharacterized protein LOC105320048 [Crassostrea gigas]	1		unknown
CGI_10005223	1.42355	5.95486e-15	525.511	0.701115	2.67857e-07	648.228	2.01457	1.73365e-58	490.976	1.37975	cAMP-responsive element-binding -like 2	0.9467		unknown
CGI_10014962	1.32239	0.0018976	4.9489	1.13306	0.00579378	5.47227	1.6604	7.09624e-05	4.72898	1.37195	cat eye syndrome critical region 6-like [Lingula anatina]	0.711		GO:0016021
CGI_10020183	1.14479	0.000944978	35.8364	1.63151	1.48104e-07	34.0186	1.33173	8.3054e-06	35.5533	1.36935	0	0		unknown
CGI_10006271	1.82831	1.38919e-09	16.3916	0.703931	0.0163292	21.8959	1.57221	2.28044e-07	17.4343	1.36815	hypothetical protein CGI_10006271	0.945		unknown
CGI_10021035	1.42914	3.92223e-06	30.6226	1.44317	1.01504e-05	31.5543	1.22777	4.99339e-05	32.699	1.3667	hypothetical protein CGI_10021035	1		unknown
CGI_10018238	1.01195	4.81743e-08	42.1002	1.17838	1.26538e-07	41.8333	1.89749	9.65511e-21	36.2204	1.36261	Neutral and basic amino acid transport rBAT	0.6565		GO:0005975;GO:0003824;GO:0043169;GO:0044425
CGI_10000754	1.77053	1.91089e-11	22.6349	1.68557	5.09675e-10	23.8395	0.630679	0.00436518	30.1402	1.36226	VWFA and cache domain-containing 1	0.7385		unknown
CGI_10008601	1.32252	3.14905e-15	70.318	1.07807	1.30565e-11	77.1321	1.68391	1.04567e-26	67.2325	1.3615	serine dehydratase-like	0.795		GO:0030170;GO:0070062;GO:0005739;GO:0006520
CGI_10015834	2.01158	5.04877e-14	33.7024	1.40635	3.98762e-10	39.0695	0.659619	0.00219756	45.9126	1.35918	hypothetical protein CGI_10015834	0.984		GO:0016021
CGI_10003749	0.685439	3.33498e-05	741.638	2.26551	6.25979e-32	569.616	1.09027	4.78132e-24	688.399	1.34707	[Nematostella vectensis]	0.572		GO:0016021
CGI_10009726	1.36971	0.00317477	1.32508	1.28799	0.00676146	1.46577	1.38282	0.0024882	1.3535	1.34684	hypothetical protein CGI_10009726	1		unknown
CGI_10015378	0.930304	3.64018e-05	180.712	0.680434	0.000527015	201.342	2.42672	4.6518e-38	143.77	1.34582	beta-microsemino -like	0.8129		unknown
CGI_10020767	1.288	1.76189e-10	66.8356	0.775903	1.07001e-05	78.4661	1.96694	1.79465e-21	60.6571	1.34362	hemicentin-1-like isoform X1	0.5895		GO:0016021
CGI_10002338	0.94866	0.00463309	18.1956	1.76232	1.81627e-09	16.1208	1.29672	1.17786e-05	17.1925	1.3359	hypothetical protein CGI_10002338	1		unknown
CGI_10006094	1.27811	0.00593587	4.80519	1.1864	0.0129935	5.05172	1.51944	0.000772094	4.64767	1.32798	Ficolin- partial	0.698		unknown
CGI_10005966	1.48903	0.0013303	1.62456	1.08679	0.0287749	2.01508	1.3987	0.00274612	1.73364	1.32484	hypothetical protein CGI_10005966	1		unknown
CGI_10024042	1.40296	1.54283e-07	53.6618	0.818861	0.000322951	64.4715	1.75102	9.89965e-16	52.0825	1.32428	Multiple epidermal growth factor-like domains 10	0.621		unknown
CGI_10018960	1.14315	1.21734e-07	296.922	1.12314	3.20789e-06	308.856	1.65801	8.04562e-10	271.082	1.3081	BPTI Kunitz domain-containing -like	0.816		GO:0019902;GO:0007166;GO:0005576;GO:0005763;GO:0008810;GO:0008237;GO:0030414;GO:0003723;GO:0003735;GO:0010923;GO:0006508;GO:0016021;GO:0030245;GO:0010466;GO:0030159;GO:0030247
CGI_10021600	1.0988	2.68277e-06	59.183	1.7077	1.02617e-10	54.152	1.10415	2.59472e-05	60.0604	1.30355	meiosis-specific with OB domain-containing -like	0.5955		GO:0090304;GO:0007127
CGI_10028359	1.08516	2.9448e-06	115.558	0.931651	0.00370077	122.672	1.88054	5.03211e-07	96.7277	1.29912	signal CUB and EGF-like domain-containing 1	0.678		unknown
CGI_10028378	0.630654	0.0240715	48.9209	0.557429	0.0173315	52.397	2.66326	8.29982e-31	35.0802	1.28378	hypothetical protein CGI_10028378	1		unknown
CGI_10023371	1.69209	1.55767e-05	7.73391	1.0089	0.00987436	9.37253	1.12438	0.00227656	9.0154	1.27513	SPEC3 [Crassostrea gigas]	0.597		GO:0016021;GO:0044464
CGI_10009216	1.99754	9.52661e-31	136.051	0.91995	2.17795e-08	173.816	0.894538	1.01894e-07	171.853	1.27068	cAMP-dependent kinase catalytic subunit-like isoform X3 [Crassostrea gigas]	0.9655		GO:0005524;GO:0004674;GO:0006468
CGI_10015330	1.22873	0.00358582	5.56119	1.39104	0.000648902	5.60915	1.18722	0.00489079	5.76216	1.269	Multiple epidermal growth factor-like domains 11	0.6165		unknown
CGI_10006388	1.66414	1.26376e-13	57.7949	1.64147	1.99009e-13	60.3884	0.492532	0.0180442	77.9455	1.26605	FAS-associated factor 2-B	0.6467		unknown
CGI_10026443	0.958645	1.43179e-11	2022.5	1.92888	5.533e-36	1747.41	0.903288	1.1764e-10	2094.56	1.26361	TPR and ankyrin repeat-containing partial	0.597		GO:0006811;GO:0016021
CGI_10020168	2.21107	2.73901e-17	122.952	0.985342	1.28955e-05	160.284	0.56503	0.0393215	175.598	1.25381	0	0		unknown
CGI_10000778	0.738166	0.000625376	137.26	1.27016	4.80849e-09	125.359	1.75294	9.65087e-18	112.978	1.25376	DDB1- and CUL4-associated factor 6-like	0.867		GO:0005634;GO:0005925;GO:0005737;GO:0030374;GO:0045944;GO:0080008
CGI_10004968	1.09046	5.32612e-10	534.479	0.450869	0.0022977	659.312	2.21637	3.99753e-36	450.302	1.25257	membrane [Algoriphagus machipongonensis]	0.5925		unknown
CGI_10001219	1.26262	0.00660756	3.76755	1.42125	0.00183634	3.77457	1.07201	0.0160371	4.17563	1.25196	BEN domain-containing 3	0.7563		GO:0005488
CGI_10002734	0.67061	0.000684512	84.3293	1.36438	8.77431e-11	74.014	1.71705	5.61981e-15	68.0763	1.25068	hypothetical protein CGI_10002734	0.723		unknown
CGI_10014384	1.14849	0.000474446	10.2366	0.997451	0.00253426	11.0513	1.60259	3.44665e-06	9.38759	1.24951	Tissue factor pathway inhibitor	0.62		GO:0004867;GO:0010951
CGI_10005341	2.26841	1.703e-47	76.6388	0.705955	7.15758e-10	106.933	0.770481	6.5136e-10	103.179	1.24828	pre-mRNA-splicing factor 18-like	0.7885		GO:0000386;GO:0071021;GO:0000350;GO:0046540;GO:0005682;GO:0016021;GO:0071048
CGI_10021746	1.35779	2.16842e-07	996.693	1.34602	4.72823e-11	1049.73	1.02597	3.05734e-06	1104.06	1.24326	collagen alpha-2(I) chain-like	1		unknown
CGI_10016233	0.996506	9.15972e-14	142.612	1.41133	1.27605e-17	135.094	1.28079	2.49987e-21	136.708	1.22954	hypothetical protein CGI_10016233	0.6163		unknown
CGI_10025639	1.03624	0.00627791	7.37883	0.78456	0.0462142	8.23757	1.85354	3.34725e-06	6.20754	1.22478	Natterin-3 [Crassostrea gigas]	0.6605		GO:0055114;GO:0016620
CGI_10013009	0.940763	0.00977478	12.0374	1.42043	6.18822e-05	11.1492	1.3069	0.00189942	10.8018	1.2227	ras association domain-containing 9-like [Crassostrea gigas]	0.905		GO:0007165
CGI_10001616	1.5361	5.0709e-06	15.39	1.43703	5.63958e-06	16.3721	0.689224	0.0322442	19.4284	1.22078	PR domain zinc finger 14	0.8025		GO:0003676;GO:0005634;GO:0046872;GO:0007409
CGI_10010333	1.12589	2.46209e-06	29.4579	0.8515	0.000261219	32.7447	1.67108	4.80562e-13	26.9698	1.21615	THO complex subunit 3	0.8715		GO:0003676;GO:0006406;GO:0004402;GO:0046872;GO:0016021;GO:0016573;GO:0000445
CGI_10002437	0.960615	0.00430724	14.8139	1.33281	0.000101378	14.085	1.34129	2.6593e-05	13.8662	1.21157	vacuolar sorting-associated 4-like	0.7895		GO:0005634;GO:0005524;GO:1902582;GO:0007033;GO:0012505;GO:0044444;GO:0031122;GO:0008568
CGI_10003042	1.28005	2.39066e-09	59.5297	1.30563	5.91575e-10	61.6959	1.01461	4.19651e-07	64.7017	1.2001	ovo isoform X1	0.725		GO:0003676;GO:0005634;GO:0046872;GO:0006366;GO:0000981;GO:0006357
CGI_10021034	1.3469	0.00151311	7.65673	1.05691	0.00915498	8.69001	1.18327	0.00225929	8.31285	1.1957	hypothetical protein CGI_10021034	1		unknown
CGI_10014629	1.19537	2.687e-07	51.5928	1.33387	2.50257e-08	52.0842	1.01917	3.08735e-05	54.8809	1.1828	hypothetical protein CGI_10014629	0.65		unknown
CGI_10013408	1.3328	0.00214197	9.43068	1.47024	5.08334e-05	9.89654	0.745059	0.0346196	11.7038	1.1827	---NA---	0		unknown
CGI_10018174	1.10329	0.00498772	212.887	1.08965	0.00549636	222.159	1.33737	0.000301056	207.143	1.17677	uncharacterized threonine-rich GPI-anchored glyco -like	1		unknown
CGI_10003114	0.86669	0.00876621	13.078	1.2309	0.000194909	12.4006	1.42814	2.25187e-05	11.6018	1.17524	Dynactin subunit 1	0.8194		GO:0004867;GO:0006508;GO:0016021;GO:0010951;GO:0008233
CGI_10019825	0.726712	0.0209406	243.592	1.26702	0.000188263	218.488	1.51976	7.61391e-08	207.243	1.17116	hypothetical protein CGI_10019825	1		unknown
CGI_10014792	0.639422	0.00841774	33.2073	1.62983	3.02633e-12	27.6021	1.23342	3.01106e-07	29.1877	1.16756	Carcinoembryonic antigen-related cell adhesion molecule 5	0.7725		GO:0016021
CGI_10015812	1.43424	2.69854e-16	59.3866	1.30603	1.03004e-12	63.2152	0.754332	0.000112625	70.7515	1.16487	Vesicular inhibitory amino acid transporter	0.5405		GO:0016021
CGI_10010253	1.48099	6.26901e-15	5711.55	0.807157	0.0328696	6683.41	1.20487	6.17471e-10	6160.53	1.16434	platelet endothelial aggregation receptor 1-like isoform X12	0.9719		GO:0004180;GO:0046872;GO:0008241;GO:0016020;GO:0006508;GO:0008237
CGI_10002393	1.09555	0.0259309	1.40994	1.37334	0.00294036	1.29576	1.00379	0.0416735	1.5127	1.15756	PREDICTED: uncharacterized protein LOC105348551	0.9733		unknown
CGI_10017360	1.63972	6.36675e-10	24.1563	0.770255	0.000879248	30.6929	1.04946	2.06009e-06	28.1584	1.15315	Alba C9orf23	0.6185		GO:0016614;GO:0050660;GO:0008152
CGI_10001192	1.35232	1.99368e-09	76.7432	0.542221	0.000665212	98.1237	1.54325	2.1335e-10	75.3311	1.14593	Carbonic anhydrase-related	0.8171		GO:0005525;GO:0007264;GO:0016021;GO:0016310;GO:0016301;GO:0005622
CGI_10002391	1.01673	1.08267e-09	82.5431	1.60557	1.03622e-22	76.1074	0.807975	0.000228356	88.5024	1.14342	hypothetical protein CGI_10002391	0.9064		GO:0016021
CGI_10009879	1.4091	3.4136e-11	152.451	0.838447	1.48532e-06	181.086	1.18155	2.10155e-13	164.422	1.14303	dimethylaniline monooxygenase [N-oxide-forming] 5-like	0.6735		GO:0005789;GO:0050661;GO:0050660;GO:0016021;GO:0055114;GO:0044237;GO:0004499
CGI_10019396	0.955101	0.00837481	12.0398	1.12327	0.00154393	12.0183	1.34803	0.000403572	10.9979	1.14214	neuronal acetylcholine receptor subunit alpha-10-like	0.9425		GO:0034220;GO:0016021;GO:0005230
CGI_10026856	0.948199	7.80267e-13	262.826	0.362043	0.000204835	321.464	2.09349	4.78962e-79	218.542	1.13458	hypothetical protein CGI_10026856	0.995		GO:0016021
CGI_10015731	1.09019	0.0231286	7.02709	1.05044	0.00809573	7.91197	1.22305	0.00166509	7.43868	1.12122	Rod outer segment membrane 1	0.663		GO:0016021
CGI_10008514	1.19525	0.00461939	6.07843	1.20158	0.00597127	6.28591	0.957863	0.0327186	6.56344	1.11823	G2 mitotic-specific cyclin-B-like	0.6555		GO:0005634
CGI_10026268	1.32032	0.00614665	3.02948	1.01939	0.0416631	3.40888	0.99621	0.0431596	3.4008	1.11197	Metabotropic glutamate receptor 7	0.695		GO:0003676;GO:0090304;GO:0004930;GO:0007186;GO:0016021
CGI_10024942	1.16561	0.014713	1.36501	1.09913	0.0245371	1.49793	1.06953	0.0267789	1.48996	1.11142	hypothetical protein CGI_10024942	0.7495		unknown
CGI_10007038	1.42568	5.50002e-38	278.181	0.98281	5.7213e-21	317.828	0.925226	4.58552e-14	316.217	1.11124	carbohydrate sulfotransferase 1-like	0.5715		GO:0008152;GO:0008146
CGI_10017526	0.894517	2.55376e-09	1339.81	0.853167	2.20618e-11	1409.65	1.58215	6.34076e-33	1187.18	1.10995	hypothetical protein CGI_10017526	1		unknown
CGI_10015943	1.03972	3.1711e-06	290.45	1.01031	1.53562e-05	303.692	1.26672	1.14216e-08	282.004	1.10559	THAP domain-containing 1	0.7105		GO:0016020
CGI_10006681	1.37385	9.30835e-09	452.989	1.60899	5.38245e-37	458.158	0.330701	0.0180477	611.41	1.10451	Collagen alpha-1(XII) chain	0.686		GO:0005581
CGI_10028285	1.83535	1.65699e-49	546.715	0.711588	3.37327e-07	716.102	0.760979	0.000110119	691.217	1.10264	kielin chordin	0.5625		GO:0030414;GO:0010466
CGI_10016788	1.2802	1.7225e-05	21.3141	0.925463	0.00105115	24.2448	1.07322	8.25229e-05	22.9523	1.09296	hypothetical protein CGI_10016788	0.7405		unknown
CGI_10005956	0.705047	4.91992e-07	120.861	0.800045	7.46265e-09	122.538	1.72563	9.09718e-25	99.0189	1.07691	PREDICTED: uncharacterized protein LOC105343272 isoform X1	0.667		unknown
CGI_10011208	0.974302	0.0498314	2.88521	1.0674	0.0310072	2.99945	1.18385	0.0137158	2.86028	1.07518	PREDICTED: uncharacterized protein LOC105349223 isoform X3	1		unknown
CGI_10003360	1.29468	9.82115e-12	79.9142	1.1712	2.51912e-13	85.5138	0.755494	2.50678e-05	92.6909	1.07379	UPF0392 -like [Crassostrea gigas]	0.6485		unknown
CGI_10021678	1.09478	5.15301e-18	334.375	1.08913	4.92872e-19	348.308	1.00536	3.48832e-15	348.685	1.06309	rap1 GTPase-GDP dissociation stimulator 1-like	0.6875		unknown
CGI_10008463	0.784014	0.000272772	36.0355	1.24939	5.31409e-10	33.5633	1.15504	7.20974e-07	33.5378	1.06282	transcription factor PML	0.6785		GO:0003676;GO:0008408;GO:0090305
CGI_10003028	0.999703	5.34434e-12	88.1892	0.846362	1.26043e-09	95.234	1.33709	7.0953e-22	83.9388	1.06105	UPF0489 C5orf22 homolog	0.6195		GO:0016021
CGI_10013701	1.04486	0.0210699	1.03411	1.07785	0.0171988	1.07475	1.05937	0.017419	1.05681	1.06069	hypothetical protein CGI_10013701	0.935		unknown
CGI_10020128	0.997804	4.34206e-11	124.071	1.41103	1.34127e-18	117.963	0.768682	8.42959e-06	133.936	1.05917	glycine-rich domain-containing 2-like [Biomphalaria glabrata]	0.675		unknown
CGI_10021519	0.881869	0.0123655	12.3696	1.27273	0.000551117	11.6107	1.02049	0.00491287	12.1737	1.05836	maelstrom homolog	0.823		GO:0016568;GO:0005634;GO:0008270;GO:0016021;GO:0015171;GO:0003333;GO:0044702
CGI_10027782	1.23498	6.9369e-07	111.385	1.3455	3.15634e-15	114.648	0.593022	0.00178724	134.911	1.05783	[Nematostella vectensis]	0.678		unknown
CGI_10020895	0.409874	0.0436423	204.539	1.88612	2.40476e-11	149.731	0.869278	1.26631e-06	183.807	1.05509	hypothetical protein CGI_10020895	0.621		GO:0016021
CGI_10000943	1.09047	3.39783e-15	363.122	1.15685	1.03825e-15	371.952	0.910723	7.63738e-11	387.094	1.05268	mantle N25	0.8133		unknown
CGI_10018415	0.884457	4.57983e-06	39.5875	1.06218	2.0603e-08	39.4321	1.1933	5.20936e-10	37.5993	1.04664	maelstrom homolog	0.662		unknown
CGI_10015694	0.939366	0.00165791	14.0806	0.877542	0.00218642	14.9113	1.32225	1.02128e-05	13.1183	1.04638	sex peptide receptor isoform X1 [Tribolium castaneum]	0.527		GO:0004930;GO:0007186;GO:0016021
CGI_10021444	0.976234	0.00745503	82.4016	0.882002	0.00863058	88.6102	1.26598	4.70667e-05	79.5919	1.04141	battenin isoform X2 [Cephus cinctus]	0.8015		GO:0007040;GO:0051453;GO:0015809;GO:0007034;GO:0005765;GO:0031301
CGI_10018988	0.682072	0.000213377	462.141	1.11507	8.25644e-18	433.675	1.28711	7.25574e-14	408.991	1.02808	kielin chordin	0.6762		unknown
CGI_10028495	1.45705	6.51523e-06	1752.94	0.868326	0.0126722	2083.15	0.757912	0.0343488	2107.36	1.02776	nacrein [Crassostrea gigas]	0.623		GO:0008270;GO:0004089;GO:0005576;GO:0006730
CGI_10017215	1.63155	7.00291e-22	114.279	0.745525	4.01338e-07	144.052	0.6947	2.02595e-06	143.543	1.02393	OTU domain-containing 6B	0.7109		unknown
CGI_10019740	1.12438	0.00173872	15.5565	0.988924	0.0029029	16.9155	0.956904	0.00571145	16.7051	1.0234	solute carrier family 12 member 9-like isoform X1	0.99		unknown
CGI_10013446	1.1479	2.54338e-12	118.444	1.17195	6.56658e-15	122.646	0.741574	7.96269e-07	133.771	1.02048	Beta-1,4-galactosyltransferase partial	0.778		GO:0005975;GO:0035250;GO:0009100;GO:0016021;GO:0009059;GO:0044763;GO:1901137;GO:0044710
CGI_10000804	0.960962	0.00381158	16.2992	1.01434	0.00282687	16.6584	1.06788	0.000670593	16.2495	1.01439	hypothetical protein CGI_10000804	0.8267		GO:0008270;GO:0016021;GO:0005622
CGI_10006497	0.713854	0.000854286	47.1204	1.12552	7.38689e-08	44.153	1.19864	0.000327212	41.5171	1.01267	hypothetical protein CGI_10006497	1		GO:0016021
CGI_10006118	0.915839	0.047621	5.78772	1.05222	0.0188263	5.82532	1.06072	0.0205795	5.63627	1.00959	Phosphatidylinositol-glycan-specific phospholipase D	0.6988		GO:0016021
CGI_10001889	0.961906	0.0183572	10.4557	1.26496	0.000698736	10.2034	0.777085	0.0372855	11.4505	1.00132	acetylcholine receptor subunit beta-like	0.6715		GO:0034220;GO:0016021;GO:0005230
CGI_10016611	1.43585	1.19434e-09	50.6265	1.01704	1.8632e-05	57.5512	0.540794	0.00191479	64.6807	0.997897	myeloma-overexpressed gene 2 homolog	0.6205		unknown
CGI_10006945	1.16755	2.66903e-11	48.5304	0.936575	6.19156e-09	53.1972	0.866088	8.83161e-06	53.1516	0.990071	GDP-D-glucose phosphorylase 1-like	0.675		GO:0008152;GO:0080048
CGI_10004892	0.909123	7.51129e-05	24.5858	1.13826	3.72381e-06	24.1285	0.884763	0.000388818	25.2737	0.977382	GDP-D-glucose phosphorylase 1-like	0.66		GO:0008152;GO:0080048
CGI_10010525	1.11876	1.39791e-06	156.941	0.769548	2.24196e-07	179.504	1.03939	1.36144e-06	163.885	0.975901	AF4 FMR2 family member 4- partial	0.7625		unknown
CGI_10004594	0.995906	6.87544e-05	53.2728	0.554426	0.00389312	62.9694	1.35015	3.68819e-11	50.7491	0.966827	transcription factor PML	0.7145		GO:0003676;GO:0008408;GO:0090305
CGI_10007494	1.16042	4.20845e-06	76.9247	1.13294	5.00262e-06	80.4999	0.603981	0.0347395	90.5533	0.965779	polycystic kidney disease 1-like 2	0.6685		GO:0005509;GO:0016021
CGI_10004491	1.05234	1.11424e-26	329.581	1.32356	4.69339e-31	323.371	0.514928	1.36995e-08	387.049	0.963608	hypothetical protein CGI_10004491	0.8667		unknown
CGI_10015721	0.680495	0.0276498	15.7067	1.50627	7.6938e-06	13.1805	0.703415	0.0375088	15.8316	0.963392	G- coupled receptor Mth2	0.584		GO:0004930;GO:0007186;GO:0016021;GO:0007166
CGI_10014228	0.622165	0.00210633	1008.29	0.653041	1.59833e-05	1043.08	1.59158	6.03729e-19	828.152	0.955597	cAMP-responsive element-binding -like 2	0.7315		GO:0003700;GO:0006355;GO:0043565
CGI_10008788	0.843398	0.00206212	18.655	0.720276	0.0213424	19.9138	1.28655	2.77074e-06	17.0542	0.950074	PREDICTED: uncharacterized protein LOC105332986 [Crassostrea gigas]	1		GO:0016021
CGI_10019678	1.32007	2.2451e-16	447.665	0.647688	0.00027382	545.969	0.869026	1.5582e-07	506.475	0.945595	THAP domain-containing 2-like isoform X1 [Acyrthosiphon pisum]	0.6995		GO:0003676
CGI_10008033	1.01095	1.56189e-05	92.7203	1.20212	1.78897e-07	92.3104	0.597092	0.0131099	105.715	0.936722	asteroid 1	0.6825		GO:0090304
CGI_10022966	0.609253	0.0320435	25.7938	1.53054	3.98234e-08	21.4853	0.659928	0.0105736	26.0718	0.933239	hypothetical protein CGI_10022966	0.654		GO:0003677;GO:0090305;GO:0004518
CGI_10003702	1.2184	1.91427e-07	30.072	0.686657	0.000700285	35.8643	0.891382	5.05013e-06	33.4828	0.932145	Exosome complex exonuclease RRP44	0.832		GO:0090503;GO:0005085;GO:0006364;GO:0006402;GO:0043547;GO:0005654;GO:0000177;GO:0000176;GO:0004534;GO:0000175;GO:0003723;GO:0016020;GO:0016075;GO:0071034;GO:0016443
CGI_10019540	0.928717	2.97444e-11	158.432	0.973688	7.42064e-14	163.087	0.875121	7.02441e-10	163.907	0.925842	F-box LRR-repeat 4	0.7135		unknown
CGI_10003261	1.05515	0.00859396	6.77452	0.909604	0.0201173	7.38753	0.771457	0.0426662	7.59664	0.91207	multiple epidermal growth factor-like domains 10 isoform X1	0.7963		unknown
CGI_10014566	0.559897	0.0212728	93.1489	1.2053	7.07998e-08	82.007	0.963371	6.07424e-07	85.6455	0.909523	-tyrosine sulfotransferase 2-like [Crassostrea gigas]	0.829		GO:0070062;GO:0016021;GO:0000139;GO:0005783;GO:0008476;GO:0006478
CGI_10028037	0.871881	6.66164e-08	321.573	0.57725	0.00133291	361.516	1.27232	5.92549e-16	299.833	0.907152	hypothetical protein CGI_10028037	1		unknown
CGI_10015097	0.921087	1.92275e-10	472.804	1.41504	2.45473e-33	443.037	0.379595	0.000292831	562.008	0.90524	acetyl- carboxylase-like	0.7585		GO:0005524;GO:0003989;GO:0006633
CGI_10001120	1.1294	0.000703538	17.2777	0.919891	0.00232947	19.1278	0.664031	0.0312594	20.2134	0.904441	hypothetical protein CGI_10001120	1		unknown
CGI_10000982	0.521788	0.0220415	43.9958	0.643395	0.0033421	44.0943	1.50855	8.07582e-11	35.283	0.891245	short transient receptor potential channel 1-like	1		unknown
CGI_10028087	1.01304	0.00326494	11.1789	0.830125	0.0151505	12.2382	0.825285	0.0170839	12.0469	0.889484	furin-like isoform X3	0.9525		unknown
CGI_10004945	1.1079	0.000107916	14.4616	0.841882	0.00196854	16.1407	0.712604	0.0126542	16.4782	0.887463	serine threonine- phosphatase mitochondrial-like isoform X2	0.8355		GO:0016020
CGI_10021974	0.559565	0.0216551	24.3183	0.83848	0.00622606	23.1928	1.26112	4.19379e-07	20.7794	0.886388	Alstrom syndrome 1	0.8535		GO:0016021
CGI_10018711	1.46847	8.16129e-31	257.248	0.762658	1.40558e-09	312.895	0.427147	0.0109557	337.483	0.886091	chitin binding beak 1	0.5775		GO:0008061;GO:0006030;GO:0005576
CGI_10028132	1.39385	1.60133e-08	28.0557	0.536731	0.0357205	36.1525	0.714562	0.00151791	33.8039	0.881714	peroxisome assembly 26-like	0.9167		GO:0005779;GO:0045046;GO:0032403
CGI_10024787	0.575933	0.01163	139.267	0.853192	1.07912e-05	134.555	1.21593	2.37616e-10	121.428	0.881686	Nuclear receptor 2C2-associated	0.7195		GO:0070062;GO:0005515;GO:0006367;GO:0005654
CGI_10022125	0.760668	9.40854e-09	127.233	0.880979	2.20775e-12	128.364	0.999658	4.33574e-12	122.567	0.880435	U8 snoRNA-decapping enzyme-like isoform X4 [Biomphalaria glabrata]	0.675		GO:0005634;GO:0097159;GO:1901363;GO:0008152;GO:0016787
CGI_10020982	0.795931	0.0285714	11.9393	0.959472	0.00223691	11.9696	0.884179	0.00523748	12.0288	0.879861	prolyl 4-hydroxylase 1-like [Crassostrea gigas]	0.69		GO:0031418;GO:0005506;GO:0016705;GO:0055114
CGI_10028430	0.73089	0.0024334	223.963	1.36035	3.65202e-13	202.028	0.53973	0.0029058	242.863	0.876991	MAM and LDL-receptor class A domain-containing 1-like	0.5694		GO:0016020
CGI_10003718	1.11147	1.77261e-10	79.0383	0.542685	0.000423768	95.1717	0.975965	2.12042e-10	83.5225	0.876706	N-acetylglucosamine-1-phosphodiester alpha-N-acetylglucosaminidase-like	0.6735		GO:0016310;GO:0016301
CGI_10021793	0.673772	0.00340782	67.0807	1.14743	0.00149452	59.7627	0.806885	6.1963e-06	66.3252	0.876027	PREDICTED: uncharacterized protein LOC105346858 [Crassostrea gigas]	1		GO:0008061;GO:0006030;GO:0005576
CGI_10024054	1.02409	3.33335e-06	40.4261	0.987171	6.28583e-06	42.3904	0.616671	0.0466058	45.6283	0.875978	PREDICTED: uncharacterized protein LOC105329159 [Crassostrea gigas]	0.618		unknown
CGI_10008602	0.989412	2.88275e-19	514.011	0.641649	5.99322e-10	584.131	0.996153	5.40753e-25	524.829	0.875738	serine dehydratase-like	0.707		unknown
CGI_10016748	0.76756	1.54447e-10	159.999	1.15311	3.01971e-21	151.912	0.695192	4.02108e-10	166.741	0.871956	[Nematostella vectensis]	0.8867		unknown
CGI_10000380	0.572606	0.00155238	62.9528	0.942761	3.00539e-08	59.3096	1.09169	3.16009e-10	56.3448	0.869019	N-alpha-acetyltransferase auxiliary subunit-like	0.8395		unknown
CGI_10028589	1.17718	4.47685e-25	306.138	0.916492	3.47191e-11	337.541	0.51288	4.34842e-05	369.531	0.86885	cysteine- acidic integral membrane -like	0.5127		unknown
CGI_10016923	1.01138	7.33022e-09	96.466	1.17817	1.11438e-13	96.5951	0.406452	0.0292023	115.999	0.865337	hypothetical protein CGI_10016923	1		unknown
CGI_10003876	0.47466	0.0012829	103.414	1.20679	1.56299e-15	89.183	0.907966	3.84744e-10	93.9299	0.86314	Acyl-coenzyme A amino acid N-acyltransferase 2	0.644		GO:0006637;GO:0004930;GO:0016746;GO:0001676;GO:0007186;GO:0016021;GO:0005829;GO:0047617;GO:0000038;GO:0032788;GO:0032789
CGI_10020009	0.611614	2.23848e-06	194.57	1.69121	2.55943e-59	160.073	0.285936	0.0103979	219.328	0.862919	Vacuolar sorting-associated 13D	0.882		GO:0008270;GO:0005622
CGI_10002709	0.758915	1.74811e-05	76.0247	0.681401	3.64254e-05	80.7232	1.14542	2.20884e-12	70.7963	0.861912	UPF0415 C7orf25 homolog isoform X2 [Octopus bimaculoides]	0.8967		unknown
CGI_10020629	0.946005	0.000120738	1108.41	0.725478	0.00347303	1221.68	0.887775	0.000262152	1150.31	0.853086	TIMP [Crassostrea gigas]	0.918		GO:0010951;GO:0005576;GO:0008191
CGI_10000130	0.504738	0.00188087	94.5257	1.34211	1.84827e-08	78.9904	0.696018	0.00302322	90.8691	0.847621	Thymidylate synthase	0.8415		GO:0004799;GO:0060041;GO:0006231;GO:0032259
CGI_10028549	0.973965	1.86041e-14	230.119	0.780913	1.30252e-11	251.158	0.781082	3.69805e-11	246.951	0.84532	D-aspartate oxidase-like	0.6995		GO:0071949;GO:0055114;GO:0003884;GO:0046416
CGI_10018831	0.654841	0.00104284	58.083	0.865515	5.85889e-06	57.1058	0.995023	3.7986e-07	54.343	0.838459	hypothetical protein CGI_10018831	0.64		GO:0016021
CGI_10003668	0.455265	0.0145564	84.2453	1.03936	6.59034e-08	74.8257	1.02052	1.26579e-08	73.8918	0.838383	U6 snRNA-associated Sm LSm1	0.8905		GO:0005634;GO:0019827;GO:0071044;GO:0000339;GO:0000290;GO:0045665;GO:0000932;GO:0044822
CGI_10027244	1.04468	1.0634e-27	374.137	0.843223	6.1897e-21	408.412	0.599535	1.55321e-07	427.662	0.829148	Baculoviral IAP repeat-containing 3	0.8022		GO:0043066;GO:0042981
CGI_10025727	0.584634	4.44724e-21	971.808	1.03791	5.95657e-60	900.762	0.864053	3.38277e-41	922.716	0.828865	Serum paraoxonase arylesterase 1	0.722		GO:0044421;GO:0004064;GO:0044237
CGI_10008161	0.961096	2.37701e-06	73.1053	0.498821	0.00748728	86.3468	1.02047	2.58198e-08	73.7599	0.826797	von Willebrand factor A domain-containing 9 isoform X1	0.717		GO:0016020
CGI_10015700	1.0779	5.09669e-06	10885.7	0.742304	0.00274443	12313.3	0.654052	0.00918508	12407.7	0.824751	inter-alpha-trypsin inhibitor heavy chain H3-like	0.671		GO:0006811;GO:0097159;GO:1901363;GO:0046872;GO:0006807;GO:0016020;GO:0044763;GO:0044710;GO:0071704
CGI_10012247	0.65756	7.69811e-05	60.8037	0.799399	0.00216783	60.1429	1.00918	8.60896e-11	56.9398	0.822047	von Willebrand factor A domain-containing 9 [Sinocyclocheilus anshuiensis]	0.7175		unknown
CGI_10020607	0.789489	1.58712e-07	160.783	0.971381	7.32167e-16	160.008	0.690421	5.71267e-05	168.304	0.817097	hypothetical protein CGI_10020607	0.626		unknown
CGI_10020075	0.908858	0.000394763	51.7584	0.432283	0.0287914	62.0368	1.10826	4.19958e-06	50.3382	0.816466	2-aminoadipate transaminase-like isoform X3 [Polistes dominula]	0.7205		GO:0030170;GO:0003824;GO:0009058
CGI_10002827	0.550724	0.00739463	56.029	1.23738	5.08665e-12	48.9565	0.660541	9.40673e-05	55.5526	0.816214	serine threonine- phosphatase 4 catalytic subunit [Harpegnathos saltator]	0.9755		GO:0004721;GO:0006470
CGI_10015487	1.30207	1.25223e-06	20.1196	0.536877	0.0451895	25.4908	0.608404	0.0108868	24.5748	0.815785	histone -like	0.86		unknown
CGI_10001299	0.815834	0.00859593	16.5316	0.806063	0.0063193	17.2758	0.809665	0.00705836	16.9263	0.810521	hypothetical protein CGI_10001299	0.82		unknown
CGI_10006816	1.06391	6.16474e-05	33.1035	0.59192	0.013797	39.1893	0.770413	0.00314866	36.5113	0.808748	YIPF5-like [Octopus bimaculoides]	0.8925		GO:0016021
CGI_10028257	0.802494	0.0317873	11.2718	0.763054	0.0423619	11.8159	0.855152	0.0211302	11.3175	0.8069	Alpha-2C adrenergic receptor	0.677		GO:0004930;GO:0007186;GO:0016021
CGI_10000153	0.431433	0.00246408	2282.28	1.33529	1.26414e-28	1898.1	0.649386	1.9705e-07	2191.83	0.805371	hypothetical protein CGI_10000153	1		unknown
CGI_10016000	0.884306	8.59351e-09	104.083	0.491901	0.00510238	120.225	1.01771	3.99996e-10	102.847	0.797972	cytochrome P450 20A1-like	0.627		GO:0005506;GO:0016705;GO:0016021;GO:0055114;GO:0020037
CGI_10021520	0.719741	1.28796e-11	1417.9	0.754271	1.29941e-11	1460.42	0.896374	4.20687e-16	1384.72	0.790129	sodium-coupled monocarboxylate transporter 1-like	0.6685		GO:0055085;GO:0016021;GO:0005215
CGI_10010781	0.682846	0.00184833	37.3337	1.05729	1.10718e-05	35.1276	0.626848	0.00392793	38.7388	0.788995	hemicentin-1 isoform X3	0.603		GO:0008061;GO:0006030;GO:0005576
CGI_10007794	0.939812	1.62643e-18	227.402	0.894796	2.79529e-21	239.293	0.528079	2.9027e-09	259.139	0.787562	zinc finger MYND domain-containing 15-like	0.5225		GO:0046872
CGI_10010526	0.724705	0.000501652	240.766	0.820357	0.000102637	243.906	0.814313	0.000153443	240.05	0.786458	temptin-like	0.5535		unknown
CGI_10002589	1.1219	2.90746e-13	634.982	0.472958	0.00780666	780.617	0.763941	1.84853e-07	707.967	0.786266	Cysteine dioxygenase type 1	0.669		GO:0044272;GO:0017172;GO:0005506;GO:0055114;GO:1901566;GO:0010243;GO:1901700;GO:0019448
CGI_10025785	0.844605	0.00665022	12.7089	0.78996	0.0115574	13.3782	0.716873	0.021134	13.5054	0.783813	hypothetical protein CGI_10025785	0.8073		unknown
CGI_10009096	0.985803	4.20624e-06	149.303	0.88023	1.22419e-05	159.563	0.484877	0.0272976	174.8	0.783637	PREDICTED: uncharacterized protein LOC105345688 [Crassostrea gigas]	0.8443		GO:0006955;GO:0016021;GO:0005164;GO:0043065;GO:0042981
CGI_10007565	0.599712	1.48198e-05	203.72	1.26573	1.3252e-24	180.205	0.469162	0.000909809	215.949	0.778203	proline-rich 2-like	0.6285		GO:0016021
CGI_10006616	0.582391	3.43302e-10	334.643	1.35936	7.11339e-36	289.19	0.392361	1.88165e-05	361.505	0.778039	rab5 GDP GTP exchange factor-like isoform X2	0.806		GO:0003677;GO:0008270;GO:0016021
CGI_10009784	0.632678	7.65338e-05	53.7731	0.672567	3.56423e-05	55.2656	1.02583	2.66975e-08	49.4447	0.777024	enolase ENO4	0.717		GO:0000287;GO:0004634;GO:0006096;GO:0000015
CGI_10002857	1.20555	9.67511e-10	44.1227	0.549788	0.000983584	54.3315	0.573664	0.000736855	53.0585	0.776334	hypothetical protein CGI_10002857	0.6935		GO:0003676;GO:0008270;GO:0016020
CGI_10013400	0.579656	0.00128834	112.779	0.69138	4.07534e-06	113.954	1.05571	2.79519e-13	102.204	0.775583	GATA zinc finger domain-containing 14-like isoform X2 [Crassostrea gigas]	0.8317		GO:0016021
CGI_10012152	0.926219	0.000793662	33.6523	0.747937	0.0196357	36.4345	0.64883	0.0370539	36.8817	0.774328	CUB and sushi domain-containing 3-like	0.51		GO:0016790;GO:0006633
CGI_10023530	1.23382	8.91871e-10	33.4564	0.628596	0.000612717	40.4783	0.445847	0.0232835	41.8696	0.769419	archaemetzincin-2 [Camelus dromedarius]	0.6355		GO:0008270
CGI_10003371	1.07337	2.95311e-25	266.751	0.676649	2.76102e-11	306.013	0.532134	5.40731e-08	313.097	0.760719	di-N-acetylchitobiase-like [Crassostrea gigas]	0.6365		GO:0004568;GO:0005975;GO:0006032
CGI_10014785	0.555083	0.0248401	685.125	0.872875	9.22278e-05	653.392	0.852669	4.53861e-05	646.381	0.760209	UPF0462 C4orf33 homolog	0.7145		unknown
CGI_10019564	1.1266	3.03414e-16	133.983	0.714965	1.19106e-09	154.139	0.427891	0.00237112	164.144	0.756487	isoaspartyl peptidase L-asparaginase-like	0.676		GO:0008152;GO:0016787
CGI_10022788	0.904467	4.88271e-05	52.5423	0.551395	0.00488152	60.3044	0.811249	4.5116e-05	55.1735	0.755704	Serine threonine- kinase Nek4	0.9025		GO:0005524;GO:0004672;GO:0006468
CGI_10013332	0.550681	7.04382e-05	255.1	0.936162	2.13403e-10	239.451	0.77605	0.000245023	243.449	0.754298	Ankyrin repeat domain-containing 50	0.7105		unknown
CGI_10020034	0.513096	0.00246456	140.856	0.751766	4.80824e-06	137.01	0.990171	1.92311e-10	126.872	0.751678	Dedicator of cytokinesis 3	0.9857		GO:0007264;GO:0005085;GO:0005622;GO:0043547
CGI_10023708	0.871223	6.81356e-06	34.8778	0.815959	5.79375e-05	36.7585	0.550723	0.00497166	38.9458	0.745968	short transient receptor potential channel 3-like	0.692		GO:0005262;GO:0016021;GO:0070588
CGI_10003948	0.637768	0.0252089	42.88	1.07381	7.18114e-06	39.9803	0.505639	0.0389193	45.8244	0.739074	codanin-1 isoform X3	0.6075		unknown
CGI_10015099	0.448959	0.00767147	200.666	0.440461	0.0160965	208.99	1.32598	9.76599e-17	164.713	0.738466	Acetyl- carboxylase	0.899		GO:0005524;GO:0003989;GO:0046872;GO:0016021;GO:0004075;GO:0006633
CGI_10025511	0.801088	1.29613e-05	176.298	1.02901	4.22782e-10	173.726	0.38526	0.0240499	203.205	0.738452	T9SS C-terminal target domain-containing	0.5555		GO:0005975
CGI_10001931	1.07629	8.22673e-14	5266.42	0.787475	2.2257e-08	5875.06	0.349763	0.0316717	6537.29	0.737842	tyrosine- kinase receptor Tie-1-like	0.6375		GO:0005524;GO:0004672;GO:0006468
CGI_10024736	0.669895	0.0123074	22.3181	0.647188	0.0165394	23.3741	0.874393	0.00167532	21.5657	0.730492	Cyclin-related FAM58A	0.86		GO:0016021
CGI_10003368	0.77606	5.88844e-09	241.139	0.92395	2.33138e-14	241.718	0.458115	0.00808799	268.834	0.719375	actin-fragmin kinase-like isoform X1 [Lingula anatina]	0.643		GO:0016021
CGI_10010533	1.07357	9.84162e-25	204.804	0.663449	7.61143e-11	235.889	0.411211	3.11722e-05	249.331	0.716078	potassium voltage-gated channel Shaw-like [Octopus bimaculoides]	0.67		GO:0005249;GO:0071805;GO:0008076;GO:0034765;GO:0051260
CGI_10001068	0.709948	0.010291	22.7186	0.596024	0.0188353	24.4802	0.840669	0.00187178	22.4523	0.715547	hypothetical protein CGI_10001068	1		unknown
CGI_10010022	0.655989	0.00993182	503.624	0.900196	1.44156e-05	492.851	0.56757	0.00310244	531.15	0.707919	hypothetical protein CGI_10010022	0.8467		unknown
CGI_10011241	0.712747	8.79904e-05	253.251	0.706521	0.000113584	263.847	0.699825	0.000117043	259.575	0.706365	short-chain collagen C4-like	0.6505		unknown
CGI_10018169	0.683041	7.88956e-08	109.323	0.714173	3.01455e-08	112.826	0.715275	4.01096e-08	110.78	0.704163	cyclin-dependent kinase 2-like	0.8925		GO:0051301;GO:0005524;GO:0004672;GO:0006468
CGI_10010286	0.692911	1.6657e-05	542.934	0.829921	4.24297e-08	544.683	0.582954	0.00299291	570.611	0.701929	hypothetical protein CGI_10010286	0.8		unknown
CGI_10027450	0.848154	3.28442e-09	122.17	0.853743	2.21419e-09	126.944	0.389624	0.00180733	142.24	0.697174	AP-4 complex subunit sigma-1	0.6835		GO:0000166;GO:0015031;GO:0004672;GO:0016310
CGI_10009367	0.484626	0.0100439	136.378	0.73741	3.82439e-06	132.247	0.852339	4.83403e-06	125.685	0.691459	Ran-binding 3	0.81		GO:0046907;GO:0005622
CGI_10008833	0.462188	0.00441638	591.838	0.549701	0.000623989	599.733	1.05785	4.79874e-12	516.954	0.689912	prostate-associated microsemino -like	0.985		unknown
CGI_10018710	0.897234	1.59309e-05	37.3926	0.581041	0.00657266	42.2666	0.589198	0.0153759	41.4397	0.689158	chitin binding beak 1	0.6135		GO:0008061;GO:0006030;GO:0005576
CGI_10021326	0.73683	0.00657923	26.1191	0.74188	0.0128326	26.9689	0.58297	0.0340018	27.8349	0.687227	Protein htrL	0.7155		unknown
CGI_10013794	0.580562	1.58609e-05	131.03	0.318982	0.00587953	147.691	1.15017	5.36019e-22	116.405	0.683237	0	0		unknown
CGI_10008138	0.321505	0.025603	586.335	0.518373	1.67425e-06	575.136	1.20768	5.56622e-23	475.187	0.68252	nose resistant to fluoxetine 6-like	0.6305		GO:0016021
CGI_10016327	0.833003	7.26561e-18	251.674	0.726016	2.1356e-14	269.085	0.486929	3.99001e-07	282.89	0.681983	Fanconi anemia group J	0.6955		GO:0005634;GO:0003677;GO:0005524;GO:0032508;GO:0004003;GO:0006139
CGI_10013079	0.524194	0.00659375	65.7242	0.584309	0.00142723	67.1917	0.935758	2.04365e-06	59.9558	0.68142	tctex1 domain-containing 2-like [Lingula anatina]	0.662		unknown
CGI_10001829	0.645405	0.000607858	465.668	0.477452	0.00318311	509.198	0.921367	2.9406e-07	442.743	0.681408	hypothetical protein CGI_10001829	0.7433		GO:0016021
CGI_10023429	0.571189	0.000101015	183.258	0.712656	3.00539e-08	183.185	0.740051	5.67539e-10	179.233	0.674632	coilin	0.5795		GO:0005634
CGI_10024831	0.587345	0.00208166	118.791	0.387127	0.0372738	131.231	1.0456	1.2966e-08	107.758	0.673357	N-acetyltransferase ESCO1	0.729		GO:0016417;GO:0016748;GO:0000084;GO:0016409;GO:0006275;GO:0034421;GO:0000785;GO:0004772;GO:0008080;GO:0005654;GO:0019107
CGI_10023836	0.781927	7.56151e-07	9358.28	0.436075	0.0376891	10701.8	0.800202	0.000318265	9454.08	0.672735	elastin-like isoform X1	0.96		GO:0016021
CGI_10011109	0.831602	4.10407e-07	140.454	0.43745	0.0205637	162.993	0.744984	0.000129956	146.505	0.671345	peptidylprolyl isomerase [Schistosoma japonicum]	0.878		GO:0005789;GO:0003755;GO:0005528;GO:0061077;GO:0000413
CGI_10004886	0.710479	7.52973e-11	155.982	0.485676	4.99106e-05	172.503	0.815034	3.89771e-12	155.014	0.670396	probable dolichyl pyrophosphate Glc1Man9 c2 alpha-1,3-glucosyltransferase	0.7395		GO:0005789;GO:0006490;GO:0042281;GO:0016021;GO:0006487
CGI_10018176	0.510809	0.0280037	1998.06	0.74758	1.28481e-06	1953.82	0.740452	1.68639e-05	1920.75	0.66628	GH23898 [Drosophila grimshawi]	0.491		unknown
CGI_10005518	0.399958	0.00682777	375.917	0.712258	1.28474e-06	357.429	0.868091	3.91898e-06	336.09	0.660102	transcriptional regulator Erg- partial	0.7675		GO:0008283;GO:0007165;GO:0000978;GO:0006366;GO:0008015;GO:0003197;GO:0003682;GO:0003199;GO:0006468;GO:0045944;GO:0004871;GO:0007599;GO:0000980;GO:0005634;GO:0001077;GO:0005515;GO:0030529;GO:0005737;GO:2000504;GO:0035855;GO:0016477
CGI_10009876	0.326517	0.0479222	7661.86	0.620063	9.59044e-11	7321.4	1.01175	3.74067e-27	6516.86	0.652776	40S ribosomal S19-like [Trichogramma pretiosum]	0.854		GO:0003735;GO:0005840;GO:0006412
CGI_10010941	0.700255	6.32044e-12	1032.64	0.489707	7.88434e-07	1138.63	0.763714	1.59425e-15	1037.86	0.651225	acetylcholine receptor subunit alpha	0.545		GO:0034220;GO:0016021;GO:0005230
CGI_10022167	0.52832	0.0147938	43.5366	0.716393	0.00015811	42.9735	0.707856	0.000381046	42.2979	0.650856	PREDICTED: uncharacterized protein LOC105334484 isoform X2 [Crassostrea gigas]	0.995		unknown
CGI_10001803	0.865972	8.10482e-08	76.3118	0.45227	0.0204096	88.863	0.630704	3.44229e-05	83.008	0.649649	Cysteine-rich secretory Mr30	0.669		GO:0005576
CGI_10015679	1.19632	9.77125e-22	376.352	0.41532	0.000327923	478.459	0.331899	0.0069063	482.211	0.647846	4-coumarate-- ligase-like 7	0.7325		GO:0008152;GO:0016874
CGI_10001212	0.967192	3.47916e-07	123.391	0.492289	0.00126946	146.283	0.482451	0.000167503	144.223	0.647311	hypothetical protein CGI_10001212	0.7675		GO:0016021
CGI_10008723	0.628042	1.85147e-05	626.216	0.336836	0.0091625	709.96	0.975092	1.99372e-10	584.304	0.646657	Sequestosome- partial	0.7267		unknown
CGI_10005263	0.386328	0.0159053	430.694	0.803243	1.74393e-19	399.384	0.743762	3.91611e-09	398.047	0.644444	AT-rich interactive domain-containing 1B-like	0.5556		unknown
CGI_10002664	0.848913	5.62936e-05	43.46	0.493584	0.0247079	49.8762	0.586439	0.0242745	47.6218	0.642979	leucine-rich repeat 1	0.659		GO:0008152;GO:0016853;GO:0008063
CGI_10002728	0.52701	2.24176e-05	123.07	0.485487	6.00828e-05	129.453	0.91522	6.78332e-11	113.009	0.642572	stimulated by retinoic acid gene 6 homolog	0.7095		GO:0016021
CGI_10003733	0.844219	1.76161e-06	133.941	0.561132	0.000756185	150.543	0.512562	0.0090953	149.937	0.639304	midasin isoform X3	0.7795		GO:0016887;GO:0005634;GO:0005524;GO:0008152;GO:0000027
CGI_10022682	0.619648	1.46716e-06	289.954	0.599362	7.73188e-07	303.387	0.694495	3.8837e-07	290.236	0.637835	uncharacterized shell 2-like	0.8067		unknown
CGI_10004916	0.524151	0.00852105	68.6242	0.606918	0.000489457	69.6798	0.780203	9.19928e-06	65.305	0.637091	LDLR chaperone MESD	0.8285		unknown
CGI_10021637	0.799931	2.96876e-10	106.317	0.751347	3.70005e-08	111.753	0.359532	0.00547015	123.013	0.636937	hypothetical protein CGI_10021637	0.96		unknown
CGI_10022583	0.479965	0.0001914	206.897	0.793465	9.86286e-06	196.176	0.624126	0.00218351	201.512	0.632519	B-cell receptor CD22-like	0.652		GO:0005509;GO:0016020
CGI_10012896	0.587876	0.0197636	151.863	0.371995	0.000393627	169.748	0.928994	0.000686311	140.399	0.629621	retinol dehydrogenase 16-like [Equus caballus]	0.611		GO:0004745;GO:0042572;GO:0042573;GO:0055114
CGI_10023661	0.559068	0.000138357	187.557	0.768824	2.31135e-07	184.076	0.526739	0.00255153	193.228	0.61821	Kazal-type serine protease inhibitor domain-containing	0.627		GO:0006508;GO:0008233
CGI_10020631	1.22946	1.13465e-20	309.158	0.381499	0.000502689	400.065	0.239139	0.0495504	411.033	0.6167	GNAT family acetyltransferase [Elizabethkingia anophelis]	0.6405		GO:0008152;GO:0008080
CGI_10013331	0.381476	0.00173872	215.893	0.704325	2.64162e-10	204.831	0.761638	1.30424e-06	197.692	0.615813	Ankyrin repeat domain-containing 50	0.6675		unknown
CGI_10013438	0.568377	6.12965e-10	416.538	0.545859	7.58121e-07	435.293	0.733184	6.40581e-14	406.68	0.615807	dpy-30 homolog	0.7805		GO:0048188;GO:0042800;GO:0000781;GO:0006348;GO:0051568
CGI_10025489	0.478142	0.000998708	120.6	0.855133	8.40464e-13	113.143	0.507242	0.000140871	122.198	0.613506	Beta- partial	0.7145		GO:0005975;GO:0004553
CGI_10021205	0.635081	1.44074e-07	763.066	0.408775	0.000410437	847.015	0.763906	9.77538e-14	753.775	0.602587	multiple epidermal growth factor-like domains 10	0.5695		GO:0003824;GO:0016020;GO:0006796
CGI_10017030	0.516432	6.75161e-05	799.993	0.35908	0.00775528	871.926	0.921916	5.94421e-10	732.582	0.599143	leucine--tRNA cytoplasmic-like [Aplysia californica]	0.8015		GO:0005524;GO:0006429;GO:0004823;GO:0006450;GO:0002161;GO:0005829
CGI_10009647	0.674604	2.72311e-06	100.777	0.55546	7.88943e-05	108.484	0.566623	8.77254e-05	106.032	0.598895	PREDICTED: uncharacterized protein LOC105347822 [Crassostrea gigas]	1		unknown
CGI_10007362	0.701171	0.000353725	138.471	0.724003	2.02251e-05	143.364	0.36411	0.046678	156.395	0.596428	Cytochrome b561 and DOMON domain-containing	0.663		GO:0016021
CGI_10026243	0.594723	0.000291986	109.49	0.471704	0.000192609	118.086	0.710078	1.26612e-07	108.428	0.592168	transmembrane 184B-like [Octopus bimaculoides]	0.9467		GO:0016021
CGI_10011392	0.598019	0.000105997	80.0306	0.770628	5.08015e-07	79.3403	0.397163	0.00866582	86.7192	0.588603	Mannose-binding A	0.902		GO:0005524;GO:0016021;GO:0008137;GO:0004828;GO:0042773;GO:0016301;GO:0005743;GO:0006434
CGI_10006749	0.526197	0.00563579	40.2109	0.629332	0.00175268	40.4877	0.607023	0.00137982	40.197	0.587517	ileal sodium bile acid cotransporter-like	0.607		GO:0016021
CGI_10013239	0.685833	1.02294e-09	444.19	0.579655	1.02129e-06	475.39	0.494404	0.000309094	478.466	0.586631	Zonadhesin	1		unknown
CGI_10017882	0.516211	0.0325932	638.77	0.780691	0.000415347	616.641	0.457456	0.045474	665.339	0.584786	endochitinase A-like [Crassostrea gigas]	0.681		GO:0019028
CGI_10001021	0.844562	7.74191e-07	1086.66	0.619257	9.41081e-09	1204.54	0.288112	0.00288111	1305.97	0.583977	#NAME?	0.7245		GO:0003810;GO:0018149
CGI_10021439	0.44232	1.22663e-06	1554.09	0.653671	1.98484e-08	1520.09	0.642709	4.28199e-10	1498.98	0.579567	inhibitor of apoptosis	0.655		GO:0008270;GO:0043066;GO:0042981
CGI_10007167	0.396268	0.000123727	330.557	0.402465	0.000197411	342.785	0.938712	4.74817e-16	291.307	0.579148	armadillo repeat-containing 6-like [Crassostrea gigas]	0.6625		unknown
CGI_10004875	0.636801	0.00484975	28.493	0.584193	0.0131308	30.0026	0.511156	0.0234089	30.1843	0.577383	zinc finger OZF-like	0.639		GO:0003676;GO:0046872
CGI_10026932	0.634521	0.0329494	88.7172	0.548528	0.0129248	95.4231	0.541738	0.0126301	93.9602	0.574929	Integrin beta-3	0.756		GO:0007229;GO:0016021;GO:0007155
CGI_10010805	0.374778	0.00113337	1497.27	0.42173	0.000401392	1534.28	0.928121	4.45086e-22	1316.05	0.574876	prostaglandin reductase 1-like	0.7405		GO:0008270;GO:0016491;GO:0055114
CGI_10023702	0.746773	4.06571e-16	638.846	0.178139	0.0173875	785.137	0.795831	1.04448e-14	644.055	0.573581	endoplasmic reticulum resident 29-like	0.7055		GO:0005788;GO:0006457;GO:0006886;GO:0009306
CGI_10028645	0.515616	0.00673006	194.177	0.744369	3.42837e-06	189.614	0.410384	0.00229914	205.279	0.55679	Acid trehalase 1	0.6245		GO:0005975;GO:0004553
CGI_10006289	0.640792	0.00744871	35.3241	0.46407	0.0254876	38.8204	0.563802	0.00817392	37.0465	0.556221	synaptotagmin-14-like isoform X5	1		GO:0016021
CGI_10005311	0.560635	9.38043e-05	1004.14	0.478654	0.000405795	1069.58	0.626894	0.000126484	1005.86	0.555394	G8 domain-containing DDB_G0286311-like	0.868		unknown
CGI_10003946	0.315209	0.019451	142.806	0.826371	1.4694e-11	128.437	0.521812	2.11101e-05	137.305	0.554464	codanin-1 isoform X1 [Anas platyrhynchos]	0.527		unknown
CGI_10000821	0.515026	0.00134316	74.1817	0.358894	0.0497728	80.7695	0.780349	1.35958e-06	70.4171	0.551423	dual specificity kinase TTK-like	0.766		GO:0005524;GO:0004712;GO:0007093;GO:0045132;GO:0006468;GO:0051304
CGI_10015969	0.657476	0.00145249	67.1332	0.385212	0.048451	75.782	0.609716	0.00472905	69.4522	0.550802	NHP2 1	0.951		GO:0003723;GO:0030529;GO:0042254;GO:0005730
CGI_10002853	0.450159	0.00407272	72.5415	0.470207	0.0052176	75.0826	0.716922	4.27701e-06	68.8167	0.545763	Cytosolic Fe-S cluster assembly factor NBP35	0.706		GO:0016021
CGI_10025717	0.38722	5.57222e-05	233.222	0.660899	6.1467e-12	224.136	0.584197	2.24577e-08	224.908	0.544105	leukocyte receptor cluster member 1	0.5725		unknown
CGI_10018438	0.600471	1.55556e-08	220.836	0.400292	0.000671783	243.176	0.622279	3.04512e-09	224.206	0.541014	tudor domain-containing 7-like [Crassostrea gigas]	0.6005		unknown
CGI_10018738	0.766334	8.12304e-07	152.792	0.41827	0.00851574	175.467	0.433522	0.0143644	171.502	0.539375	Werner syndrome ATP-dependent helicase	0.747		GO:0003676;GO:0005524;GO:0008152;GO:0004386
CGI_10018801	0.626621	1.34086e-09	265.225	0.502497	3.68024e-05	285.323	0.484835	3.75097e-08	282.244	0.537984	Tubulin polyglutamylase complex subunit partial	0.7745		unknown
CGI_10007670	0.460117	6.84969e-05	1504.34	0.527839	5.11682e-08	1534.48	0.608908	5.03633e-06	1471.56	0.532288	PREDICTED: uncharacterized protein LOC105346062	1		unknown
CGI_10007737	0.547088	9.31033e-09	247.68	0.543476	1.38145e-08	257.703	0.499626	1.84615e-07	256.532	0.530063	FAM192A isoform X3 [Microcebus murinus]	0.652		unknown
CGI_10006902	0.584244	3.00885e-05	1105.55	0.372005	0.0121479	1223.91	0.6327	6.42349e-07	1114.88	0.52965	Multiple epidermal growth factor-like domains 10	0.7775		GO:0016021
CGI_10019739	0.607516	5.72879e-10	854.806	0.323155	8.61825e-07	967.168	0.657016	8.90005e-25	863.124	0.529229	solute carrier family 12 member 9-like	0.744		GO:0016021;GO:0008324;GO:0015293;GO:0006821;GO:0098660
CGI_10019814	0.503371	2.67476e-06	420.501	0.750563	1.12879e-12	408.35	0.33324	0.0032116	451.978	0.529058	thioredoxin AAED1	0.5515		GO:0016209;GO:0016491;GO:0098869;GO:0055114
CGI_10018889	0.542184	2.71004e-08	186.834	0.31506	0.0185599	207.609	0.72226	4.06222e-11	181.645	0.526501	transporter SVOPL	0.713		GO:0055085;GO:0022857;GO:0016021
CGI_10008178	0.590555	0.00522501	37.7133	0.452739	0.0266318	40.9328	0.534312	0.00778524	39.2567	0.525869	protocadherin-9-like isoform X1 [Crassostrea gigas]	0.5895		GO:0005509;GO:0016021;GO:0007156;GO:0005886
CGI_10022129	0.351305	0.00254584	296.479	0.810798	8.48275e-14	271.058	0.410768	1.18871e-05	297.774	0.52429	neutral cholesterol ester hydrolase 1-like [Crassostrea gigas]	0.6045		GO:0008152;GO:0016021;GO:0052689
CGI_10009368	0.527238	6.05896e-05	298.326	0.684722	1.83519e-10	297.152	0.346442	0.00367674	321.896	0.519467	Huntingtin-interacting K	0.8235		unknown
CGI_10007669	0.446478	7.51916e-05	1152.19	0.560462	9.08367e-11	1160.02	0.550012	4.08282e-05	1141.34	0.518984	hypothetical protein CGI_10007669	1		GO:0016021
CGI_10006595	0.573617	2.79737e-05	354.1	0.537455	1.2328e-07	372.373	0.445485	7.98538e-05	375.786	0.518853	hypothetical protein CGI_10006595	0.732		GO:0016020
CGI_10020905	0.453015	4.11111e-05	1328.44	0.849089	2.1974e-11	1237.76	0.251084	0.0132509	1444.91	0.517729	probable chaperone HSP31 [Crassostrea gigas]	0.6865		GO:0006089
CGI_10016293	0.577893	9.74098e-14	2186.13	0.49197	2.12563e-05	2326.46	0.473941	2.43678e-08	2300.58	0.514602	leucine-rich repeats and immunoglobulin-like domains 3	0.615		GO:0008063
CGI_10024757	0.496316	3.81976e-08	519.595	0.678229	7.46922e-16	513.581	0.367811	2.44906e-06	551.42	0.514118	N-acetylneuraminate lyase	0.5585		GO:0008152;GO:0016829
CGI_10002264	0.485698	1.32073e-07	559.443	0.735181	2.52254e-15	542.674	0.319498	0.000653481	601	0.513459	Adenine phosphoribosyltransferase	0.7655		GO:0016757;GO:0009116
CGI_10007443	0.492134	0.00312142	630.216	0.479836	0.00203524	657.934	0.568349	0.00105197	629.164	0.51344	collagen alpha-1(XXII) chain-like isoform X2	0.7929		unknown
CGI_10017961	0.481176	0.000716941	81.4483	0.668704	1.05493e-06	80.26	0.354732	0.0335437	86.4275	0.501538	elongation of very long chain fatty acids 4-like isoform X1 [Sinocyclocheilus grahami]	0.824		GO:0016021;GO:0016740;GO:0006633
CGI_10006122	0.537487	1.81136e-08	447.321	0.540345	4.34386e-05	463.71	0.412816	0.000129754	473.828	0.496883	eukaryotic translation initiation factor 3 subunit K isoform X2	0.7875		GO:0003743;GO:0001731;GO:0016282;GO:0043022;GO:0033290;GO:0006446;GO:0005852
CGI_10027740	0.636826	6.55691e-05	67.3961	0.52413	0.00101995	72.3517	0.326297	0.0455859	75.5658	0.495751	hypothetical protein CGI_10027740	1		GO:0016021
CGI_10009038	0.356292	0.0197652	121.742	0.51518	0.000322179	120.807	0.608619	2.53592e-05	115.52	0.493364	solute carrier family 28 member 3-like	0.742		GO:0005415;GO:0005887;GO:1901642
CGI_10026434	0.619955	6.02467e-06	519.814	0.45948	0.000115432	566.648	0.386962	9.79858e-06	569.258	0.488799	[Nematostella vectensis]	0.6275		GO:0016491;GO:0055114
CGI_10025697	0.58763	2.61141e-07	465.784	0.509858	2.86509e-07	495.471	0.367538	0.00171952	507.829	0.488342	hypothetical protein CGI_10025697	0.935		GO:0016021
CGI_10017247	0.560432	1.84895e-06	230.639	0.325475	0.00194993	257.558	0.578141	1.02449e-07	234.823	0.488016	solute carrier family 23 member 1-like isoform X1	0.7665		GO:0055085;GO:0016021;GO:0005215
CGI_10009569	0.349954	0.00188624	987.615	0.619908	2.88527e-09	949.089	0.481165	1.42208e-05	970.213	0.483676	type I secretion target GGXGXDXXX repeat-containing domain [Tolypothrix PCC 7601]	0.58		unknown
CGI_10021299	0.269537	0.0175041	595.326	0.600364	8.28553e-11	560.624	0.558465	1.05863e-15	558.076	0.476122	Dehydrogenase reductase SDR family member 11	0.732		GO:0016491;GO:0055114
CGI_10017498	0.600479	2.16038e-12	638.706	0.419517	0.000113012	698.879	0.394865	4.32497e-05	692.302	0.471621	glycosyltransferase 25 family member	0.7085		GO:0008152;GO:0016740
CGI_10023673	0.626631	4.25573e-16	344.005	0.561872	1.56936e-13	364.119	0.224068	0.0040847	396.003	0.470857	unc-93 homolog A [Anas platyrhynchos]	0.525		GO:0016021
CGI_10013181	0.517359	0.000257596	230.84	0.50704	0.0011981	240.568	0.380947	0.0223018	245.405	0.468449	centriolin-like isoform X1	0.814		unknown
CGI_10020660	0.486289	7.51859e-05	2700.58	0.595024	3.09033e-06	2720.62	0.318679	0.0354564	2901.03	0.466664	ankyrin repeat and KH domain-containing 1-like	0.7055		unknown
CGI_10014414	0.658964	3.21976e-06	490.629	0.374683	0.0231623	553.719	0.364985	0.0131204	546.216	0.466211	PREDICTED: uncharacterized protein LOC105333082 [Crassostrea gigas]	0.8233		GO:0016021
CGI_10026306	0.60495	3.48306e-11	485.722	0.413519	5.28046e-05	533.446	0.377794	1.53484e-05	530.376	0.465421	39S ribosomal mitochondrial	0.6885		GO:0005840
CGI_10007438	0.569157	3.23544e-10	320.668	0.454306	1.1279e-07	344.787	0.37072	2.91209e-05	347.353	0.464727	NK-tumor recognition	0.725		GO:0003755;GO:0000413;GO:0006457
CGI_10025737	0.370393	0.00498513	96.4085	0.455163	0.000751115	97.5231	0.565387	8.65931e-06	92.9332	0.463647	U4 U6 small nuclear ribonucleo Prp3	0.7415		GO:0046540;GO:0019013;GO:0000398
CGI_10020448	0.3276	0.0113118	344.299	0.501328	2.40096e-07	340.032	0.56087	9.37142e-07	328.434	0.463266	cadherin-87A-like isoform X3	0.6035		GO:0005509;GO:0016021;GO:0007156
CGI_10019964	0.548256	4.94304e-05	85.2312	0.381976	0.00982032	93.1834	0.452609	0.00527774	89.6416	0.460947	mitochondrial ribosome-associated GTPase 1	0.6755		GO:0005525;GO:0005743
CGI_10007754	0.401697	5.03284e-06	1465.01	0.769137	4.44859e-22	1374.97	0.206122	0.0266458	1591.38	0.458985	brain-specific angiogenesis inhibitor 1-like	0.7015		GO:0004930;GO:0007186;GO:0034220;GO:0016021;GO:0005230;GO:0007166
CGI_10007879	0.482819	2.89166e-11	901.806	0.717619	1.22646e-19	878.536	0.17474	0.0198758	1013.83	0.458392	failed axon connections homolog	0.8315		GO:0016021
CGI_10010297	0.32962	0.0318357	108.924	0.61421	3.80459e-05	104.161	0.425739	0.0160922	107.942	0.456523	hypothetical protein CGI_10010297	1		unknown
CGI_10020149	0.423337	0.000647444	239.202	0.432964	0.000189189	248.251	0.50739	9.53558e-06	238.632	0.454564	coenzyme Q-binding COQ10 homolog mitochondrial-like	0.7655		unknown
CGI_10010503	0.372303	1.12612e-05	887.324	0.505237	9.3231e-12	887.238	0.470278	7.84691e-10	880.682	0.449273	[Nematostella vectensis]	0.6765		unknown
CGI_10025608	0.270822	0.0167138	221.222	0.525591	1.43343e-07	213.036	0.545404	2.10285e-07	208.215	0.447272	canopy 4	0.7385		unknown
CGI_10002446	0.43971	0.00553792	3509.13	0.374535	0.032657	3719.71	0.524165	0.000240099	3499.32	0.446137	tetraspanin-1-like isoform X2	0.8285		GO:0016021
CGI_10003434	0.402913	7.88699e-06	391.796	0.503235	9.38233e-09	395.38	0.419674	7.74912e-06	398.13	0.441941	HEAT repeat-containing 6 isoform X1	0.584		GO:0044822
CGI_10023794	0.470217	2.12765e-05	152.948	0.367042	0.00542494	163.774	0.487431	5.36485e-05	155.381	0.441564	dioxygenase Mb0100 [Halyomorpha halys]	0.753		GO:0016491;GO:0055114
CGI_10004438	0.455415	4.04756e-05	394.956	0.353513	0.00333108	423.417	0.507428	0.00019809	397.197	0.438785	Midasin	0.5325		GO:0016887;GO:0005634;GO:0008152;GO:0000027
CGI_10015871	0.467432	4.64003e-06	462.327	0.413471	0.000273442	488.139	0.423441	0.000211328	478.214	0.434781	uncharacterized threonine-rich GPI-anchored glyco -like	0.995		unknown
CGI_10027339	0.304443	0.0489247	84.8945	0.529972	0.00104135	82.382	0.464132	0.0117757	82.5153	0.432849	multiple epidermal growth factor-like domains 10 isoform X1 [Crassostrea gigas]	0.726		GO:0016311
CGI_10006482	0.501312	1.08185e-09	5395.35	0.487712	2.31958e-16	5634.89	0.309363	0.000977701	5839.98	0.432796	Calmodulin	0.7535		GO:0015630;GO:0033192;GO:0090257;GO:0046676;GO:0045955;GO:1903649;GO:0043227;GO:0044093;GO:0048583;GO:0010604;GO:0048731;GO:0071333;GO:0044430;GO:0005509;GO:0051592;GO:0016020;GO:0005829;GO:0031325;GO:0080090;GO:0019899
CGI_10028194	0.43021	0.000251175	113.8	0.493769	0.000171001	116.3	0.364873	0.00238962	118.585	0.429618	Trimethylguanosine synthase	0.829		GO:0016205;GO:0018707;GO:0043827;GO:0080012;GO:0015030;GO:0043782;GO:0008988;GO:0000179;GO:0008425;GO:0043791;GO:0005829;GO:0052735;GO:0043834;GO:0034541;GO:0009008;GO:0043833;GO:0000387;GO:0052665;GO:0052666;GO:0071164;GO:0005515;GO:0071167;GO:0070677;GO:0030532;GO:0018423;GO:0034933;GO:0052667;GO:0034931;GO:0052624;GO:0016428;GO:0043803;GO:0009452;GO:0044255;GO:0005730;GO:0009019;GO:0043770;GO:…
CGI_10008600	0.47667	1.90458e-07	234.595	0.548468	1.68429e-07	238.802	0.248372	0.00752581	257.184	0.424503	serine dehydratase-like	0.7075		unknown
CGI_10000466	0.696403	1.87081e-12	213.636	0.308369	0.00230652	248.585	0.263168	0.0160427	247.729	0.422647	Ephrin type-A receptor partial	0.652		GO:0005524;GO:0018108;GO:0005856;GO:0004715;GO:0005509
CGI_10023446	0.416819	0.00259716	8854.36	0.489843	7.88351e-05	9012.43	0.36013	0.00647472	9208.21	0.422264	hypothetical protein CGI_10023446	1		unknown
CGI_10026090	0.412981	0.00056052	151.797	0.439769	0.000306878	156.703	0.408361	0.000295141	155.44	0.42037	IQ domain-containing C	0.6492		unknown
CGI_10003866	0.563748	9.17038e-08	640.687	0.388324	3.96982e-06	701.393	0.291484	0.00425114	710.27	0.414519	zinc transporter ZIP12 isoform X3	0.5915		GO:0055085;GO:0016021;GO:0046873;GO:0030001
CGI_10016304	0.302942	0.00812078	310.365	0.452092	3.22135e-05	308.211	0.484294	3.65612e-05	299.882	0.413109	hsp90 co-chaperone Cdc37 [Nasonia vitripennis]	0.874		GO:0051301;GO:0019901;GO:0031072;GO:0005737;GO:0051087;GO:0051082;GO:0006457;GO:0050821
CGI_10014218	0.431876	0.00159517	86751.9	0.313554	0.00991777	93589.5	0.471487	0.00039856	87606.2	0.405639	neuraminidase (sialidase)	0.626		unknown
CGI_10014349	0.6484	1.26992e-11	489.946	0.378153	9.66332e-07	551.088	0.181221	0.0266252	576.594	0.402591	transmembrane 214	0.6345		GO:0005737;GO:0016021
CGI_10003622	0.427591	0.000131168	419.646	0.388063	3.15164e-08	442.087	0.385095	5.88284e-05	434.43	0.40025	pyrroline-5-carboxylate reductase 2-like	0.7615		GO:0004735;GO:0055114;GO:0055129
CGI_10002723	0.629147	2.04233e-21	548.641	0.352747	4.3945e-06	617.696	0.215534	0.000768747	634.026	0.399143	WD repeat-containing 73	0.5945		unknown
CGI_10016707	0.380679	0.000536872	381.815	0.442759	4.76203e-06	389.894	0.366044	0.00589396	391.517	0.396494	DENND6A-like isoform X2	0.8325		unknown
CGI_10010832	0.4388	0.000813834	250.455	0.365129	0.0154899	266.094	0.379184	0.00467957	260.674	0.394371	metaxin-2-like [Crassostrea gigas]	0.74		GO:0006626;GO:0005741
CGI_10012352	0.38865	0.000112647	4787.32	0.290306	9.74533e-07	5134.81	0.503667	1.204e-09	4730.76	0.394208	PIF-like [Crassostrea gigas]	0.561		GO:0008061;GO:0006030;GO:0005576
CGI_10027432	0.470394	9.4499e-10	377.54	0.346578	0.000346619	407.157	0.356575	0.000859967	398.654	0.391182	Hook homolog 3-like isoform X3	1		unknown
CGI_10001868	0.20613	0.0198915	389.062	0.563664	2.36862e-12	362.57	0.400045	9.49768e-07	373.897	0.389946	asunder homolog isoform X2	0.754		GO:0051642;GO:0005515;GO:0030317;GO:0090435;GO:0005737;GO:0007052;GO:0080154;GO:0042795;GO:0007346;GO:0005654
CGI_10020623	0.401567	0.00680244	85.4617	0.332729	0.0210338	90.7206	0.427713	0.00111982	86.7409	0.387336	ribonuclease P subunit p30 isoform X2	0.6275		GO:0003723;GO:0090501;GO:0008033;GO:0004540
CGI_10020643	0.410533	0.00327249	187.396	0.371005	0.00522666	197.445	0.378046	0.00182582	193.71	0.386528	CLK4-associating serine arginine rich -like	0.9533		unknown
CGI_10005412	0.373048	0.000260048	319.65	0.248201	0.0435916	345.271	0.529048	1.40653e-07	311.793	0.383432	Vacuolar -sorting-associated 36	0.799		GO:0031902;GO:0043328;GO:0070062;GO:0043130;GO:0008022;GO:0000814;GO:0005829;GO:0032266;GO:0005764
CGI_10017927	0.37616	1.80221e-05	413.2	0.202053	0.0461159	453.613	0.570033	4.93912e-12	398.953	0.382749	PREDICTED: uncharacterized protein LOC105343249 [Crassostrea gigas]	0.6255		GO:0003824;GO:0008152
CGI_10018119	0.519346	3.56002e-08	624.753	0.189703	0.0414996	718.904	0.436623	2.37974e-06	654.106	0.381891	nicalin isoform X3	0.787		GO:0005789;GO:0016021;GO:0009966
CGI_10027614	0.304363	0.00516129	377.114	0.392956	0.00122303	381.273	0.44175	7.92171e-05	369.588	0.37969	prostaglandin E2 receptor EP4 subtype-like	0.6265		GO:0004930;GO:0007186;GO:0016021
CGI_10001934	0.233635	0.045376	289.857	0.286972	0.00855732	296.348	0.615418	3.95571e-10	264.438	0.378675	probable rRNA-processing EBP2	0.6285		GO:0031981;GO:0042254
CGI_10011709	0.230362	0.00385946	361.337	0.565589	2.33613e-10	339.644	0.33596	0.000440409	357.076	0.377304	Tetratricopeptide repeat 23	0.6825		unknown
CGI_10013074	0.437987	6.26626e-06	204.764	0.26954	0.00715735	224.024	0.423998	4.51027e-05	210.016	0.377175	prenylcysteine oxidase-like	0.6525		GO:0030328;GO:0001735;GO:0016020;GO:0055114
CGI_10004888	0.316107	0.0289157	144.961	0.365514	0.00885806	148.602	0.444169	0.000173883	142.719	0.375263	C-type mannose receptor 2	0.785		GO:0016021
CGI_10018565	0.462834	9.57889e-07	451.334	0.374923	0.000822412	481.355	0.275527	0.0132455	488.121	0.371095	malate dehydrogenase 1B	0.6915		GO:0005975;GO:0016615;GO:0006108;GO:0016616;GO:0055114
CGI_10015629	0.423009	0.00695178	153.994	0.329381	0.032534	164.913	0.355893	0.0277799	160.633	0.369428	F-box LRR-repeat 4 [Anolis carolinensis]	0.64		GO:0008063
CGI_10007957	0.210762	0.0139385	594.046	0.384801	4.94632e-07	584.671	0.508492	8.32021e-09	554.069	0.368018	Cation-dependent mannose-6-phosphate receptor	0.5105		GO:0016021
CGI_10011760	0.409568	1.06418e-05	599.605	0.304319	0.00480831	643.844	0.38841	3.54324e-05	616.724	0.367432	sodium-coupled monocarboxylate transporter 1-like [Aplysia californica]	0.7085		GO:0055085;GO:0015718;GO:0016021;GO:0015293;GO:0051181;GO:0051180;GO:0042886
CGI_10018944	0.370564	0.00458451	155.479	0.371993	0.0101868	161.492	0.353923	0.0223208	159.551	0.365493	GPI mannosyltransferase 1	0.7135		GO:0006506;GO:0016758;GO:0016021;GO:0005783
CGI_10028769	0.390155	0.001024	1363.64	0.396937	0.000830516	1414.66	0.30816	0.0101892	1429.2	0.365084	hypothetical protein CGI_10028769	0.95		GO:0016021
CGI_10012720	0.166737	0.00370648	1185.11	0.496198	1.08725e-20	1113.6	0.424871	4.58272e-14	1117.16	0.362602	Germinal-center associated nuclear partial	0.5745		GO:0000166;GO:0003676
CGI_10008154	0.319396	0.00755701	246.674	0.329168	0.00220277	255.664	0.435674	2.88141e-05	243.154	0.361413	zinc finger 91-like isoform X1 [Crassostrea gigas]	0.52		GO:0003676;GO:0046872
CGI_10011379	0.511796	5.50628e-06	403.336	0.293192	0.00917088	448.184	0.265297	0.0154302	444.317	0.356762	Target of Nesh-SH3	0.5945		unknown
CGI_10009528	0.235721	0.00405357	407.432	0.273714	0.0324781	417.757	0.555881	3.07854e-09	377.764	0.355105	Xaa-Pro aminopeptidase 1	0.77		GO:0046872;GO:0006508;GO:0004177
CGI_10011307	0.3481	4.77073e-05	671.341	0.302972	0.000316924	707.516	0.413678	4.86089e-07	672.352	0.354917	U1 small nuclear ribonucleo C	0.8965		GO:0000243;GO:0008270;GO:0000395;GO:0030627;GO:0030619;GO:0019013;GO:0003729;GO:0071004;GO:0005685;GO:0000387
CGI_10017148	0.284124	0.00408654	769.433	0.404206	2.92908e-08	771.074	0.365009	8.89628e-07	766.752	0.351113	anoctamin-10-like isoform X4 [Crassostrea gigas]	0.7705		GO:0016021
CGI_10023323	0.354653	0.00305548	281.302	0.306765	0.0212347	296.82	0.391069	0.023613	283.578	0.350829	white isoform X1 [Polistes dominula]	0.634		GO:0016887;GO:0005524;GO:0008152;GO:0016021
CGI_10025609	0.281248	0.00343412	8162.01	0.432949	1.83203e-06	8100.46	0.337453	0.00020734	8196.68	0.35055	Actin-related 2 3 complex subunit 1A	0.776		GO:0051015;GO:0034314;GO:0005885
CGI_10017011	0.408841	0.000559641	683.176	0.32586	0.0267435	728.019	0.314757	0.014553	718.611	0.349819	26S proteasome non-ATPase regulatory subunit 12-like	0.8555		GO:0043161;GO:0070062;GO:0005737;GO:0016020;GO:0008541;GO:0031595
CGI_10021944	0.241295	0.0245692	757.292	0.511214	2.8734e-07	725.165	0.296561	0.00414372	760.418	0.34969	peripheral plasma membrane CASK-like isoform X6 [Crassostrea gigas]	0.846		unknown
CGI_10006680	0.361578	0.00679262	382.237	0.339048	0.00823263	400.202	0.339905	0.0238926	392.951	0.346844	low-density lipo receptor-related 4-like	0.577		GO:0016021
CGI_10016930	0.268111	0.0204589	188.54	0.359878	0.00138969	190.361	0.407853	8.08826e-05	184.389	0.345281	glycosaminoglycan xylosylkinase	0.736		GO:0000166;GO:0016020;GO:0043167;GO:0005794;GO:0016773;GO:0044237;GO:1903955;GO:0005654
CGI_10008099	0.338453	0.000866903	1195.36	0.224574	0.0185874	1288.59	0.458721	4.31526e-10	1178.66	0.340583	vesicle-fusing ATPase 1-like	0.8235		GO:0016887;GO:0005524;GO:0048211;GO:0043001;GO:0006891;GO:0005795
CGI_10012877	0.341754	4.23179e-06	521.888	0.276003	0.000106182	553.94	0.391591	1.85654e-07	525.181	0.336449	hypothetical protein CGI_10012877	0.6343		unknown
CGI_10028634	0.304042	0.024213	448.277	0.387106	0.000150381	454.839	0.306163	0.0159684	458.077	0.332437	Rho-related GTP-binding	0.647		GO:0005525;GO:0007264;GO:0016020;GO:0015031;GO:0005622
CGI_10006615	0.458994	0.000100208	407.277	0.269611	0.0199592	448.929	0.267201	0.0297294	441.64	0.331936	CDP-diacylglycerol--inositol 3-phosphatidyltransferase-like	0.7675		GO:0003407;GO:0060042;GO:0016021;GO:0007399;GO:0005794;GO:0006661;GO:0003881
CGI_10014478	0.454825	6.71804e-09	293.118	0.212768	0.00677236	328.461	0.327783	0.00010473	311.304	0.331792	thioredoxin domain-containing 15-like	0.687		GO:0005623;GO:0016021;GO:0045454
CGI_10015743	0.246742	0.00217707	465.265	0.330786	3.5252e-05	471.165	0.412453	6.94006e-07	451.45	0.329994	Autophagy-related 101	0.849		GO:0000045;GO:0000407
CGI_10021394	0.38414	9.24636e-08	9730.07	0.366596	8.92321e-06	10168.4	0.234994	0.00696791	10414.5	0.328577	PLANT CADMIUM RESISTANCE 3-like	0.7665		GO:0016021
CGI_10020042	0.510587	1.49662e-11	1119.77	0.207646	0.0211283	1277.3	0.265004	0.00100156	1232.68	0.327746	A disintegrin and metallo ase with thrombospondin motifs 2	0.557		GO:0008270;GO:0007229;GO:0016020;GO:0006508;GO:0004222;GO:0005578
CGI_10010869	0.272835	0.0116152	245.817	0.473186	3.54669e-06	240.11	0.231033	0.0248004	254.581	0.325685	DNA polymerase epsilon subunit 3-like [Sinocyclocheilus anshuiensis]	0.955		GO:0005634;GO:0046982
CGI_10025850	0.342606	0.0118625	1807.91	0.238294	0.0464079	1943.88	0.39493	0.00138941	1818.58	0.325277	procollagen-lysine,2-oxoglutarate 5-dioxygenase 1-like isoform X2	0.734		GO:0031418;GO:0001755;GO:0008045;GO:0005506;GO:0005783;GO:0055114;GO:0008475
CGI_10021330	0.244578	9.38336e-05	581.552	0.154778	0.0208066	622.492	0.575714	1.83579e-12	537.871	0.325023	Seleno O	0.7565		unknown
CGI_10017178	0.440019	2.6542e-25	8047.92	0.344134	5.50756e-18	8612.75	0.182798	1.83064e-05	8907.35	0.322317	elongation factor 2	0.88		GO:0005525;GO:0040035;GO:0003746;GO:0005737;GO:0002119;GO:0048477;GO:0003924;GO:0008340;GO:0009792;GO:0006915;GO:0006414;GO:0040007
CGI_10007734	0.345065	0.000492956	4705.75	0.270059	0.00211997	5009.93	0.350711	0.00011151	4801.18	0.321945	cytochrome heme mitochondrial-like	0.7145		GO:0009055;GO:0016020;GO:0020037
CGI_10014649	0.571192	6.56043e-19	561.853	0.199724	0.0126382	653.501	0.194606	0.00726073	643.38	0.321841	spindle and centriole-associated 1-like	0.6105		GO:0044424;GO:0090307
CGI_10021590	0.258745	0.0174551	296.879	0.255721	0.0272433	309.003	0.445659	3.16083e-06	286.416	0.320042	probable C-mannosyltransferase DPY19L3	0.6835		GO:0016021;GO:0016740
CGI_10026566	0.254882	0.00105015	340.073	0.390547	3.16612e-07	338.968	0.314108	2.64431e-05	340.994	0.319846	zinc finger 271-like isoform X2	0.4145		GO:0046872
CGI_10010069	0.358039	0.0001637	347.936	0.300711	0.00714979	368.254	0.296893	0.00444717	362.325	0.318548	[Nematostella vectensis]	0.768		unknown
CGI_10000060	0.322786	7.50605e-05	837.709	0.445478	9.9807e-09	839.123	0.185962	0.0194081	894.136	0.318076	hypothetical protein CGI_10000060	0.9775		GO:0016021
CGI_10019390	0.302121	0.00787085	451.412	0.348103	0.00954316	462.151	0.294415	0.00893691	462.659	0.314879	importin-4-like [Crassostrea gigas]	0.663		GO:0044428;GO:0006606;GO:0008536
CGI_10007372	0.346453	0.00161222	170.926	0.30306	0.0125264	179.769	0.2912	0.00870883	177.606	0.313571	CIP2A homolog isoform X2	0.591		unknown
CGI_10027436	0.325916	0.000469851	631.144	0.401197	6.43024e-08	641.683	0.213456	0.0396961	668.24	0.313523	Hook homolog 3 isoform X2	0.7875		GO:0007040;GO:0042802;GO:0007032;GO:0005794;GO:0008333;GO:0008017;GO:0022027;GO:0000242;GO:0005801;GO:0070695;GO:0045022;GO:0005829;GO:0050768;GO:0031122;GO:0034454;GO:0071539;GO:0030897;GO:0051645
CGI_10010824	0.283549	0.0189876	224.201	0.406828	6.01478e-05	224.645	0.244953	0.0177428	232.13	0.311776	OTU domain-containing 6B	0.7035		GO:0008233
CGI_10003855	0.345077	0.00192838	166.7	0.266897	0.00899198	177.816	0.321904	0.00219756	171.845	0.311293	transmembrane 263-B-like	0.735		unknown
CGI_10009716	0.275052	0.001102	334.854	0.38049	2.332e-07	337.028	0.270067	0.00539054	342.561	0.308536	serine threonine- kinase ULK3-like	0.739		GO:0005524;GO:0004672;GO:0006468;GO:0008589;GO:0010506
CGI_10018483	0.36964	4.17787e-05	365.271	0.230756	0.0358085	396.569	0.324353	0.000950448	378.484	0.308249	prefoldin subunit 4	0.771		GO:0005634;GO:0016272;GO:0005739;GO:0051087;GO:0051082;GO:0006457
CGI_10026471	0.297963	0.0106347	211.663	0.289147	0.00122236	220.583	0.325808	0.00984637	214.022	0.304306	Multiple coagulation factor deficiency 2	0.7933		GO:0016788;GO:0005509;GO:0008152
CGI_10006399	0.384277	4.27588e-07	555.883	0.331774	0.000118331	587.138	0.191964	0.0215733	603.346	0.302672	ADP-ribosylation factor GTPase-activating 1-like isoform X2	0.722		GO:0005096;GO:0043547
CGI_10007958	0.362513	0.00081926	221.067	0.275164	0.0132251	236.233	0.269583	0.00789109	232.72	0.30242	rolling stone-like	0.542		GO:0016021
CGI_10006834	0.311271	0.00041277	328.121	0.231132	0.00307621	349.982	0.362387	4.71145e-06	330.276	0.301597	GDP-fucose transporter 1-like	0.8075		GO:0016021
CGI_10021605	0.286791	0.0210699	224.892	0.272493	0.0390056	234.777	0.342834	0.00734773	225.755	0.300706	H ACA ribonucleo complex subunit 1	0.8305		GO:0031429;GO:0001522;GO:0005515;GO:0070034;GO:0090661;GO:0015030;GO:0019013;GO:0006364;GO:0000784;GO:0001651;GO:0034513;GO:0044822
CGI_10010704	0.458027	2.7086e-07	211.941	0.22281	0.0110452	237.072	0.218095	0.0243384	233.185	0.299644	zinc finger 699-like	0.6785		GO:0003676;GO:0046872
CGI_10006916	0.353341	7.71137e-08	586.474	0.271535	7.33766e-05	625.532	0.265532	4.79134e-05	615.863	0.296802	WD repeat-containing 37-like	0.741		unknown
CGI_10025010	0.270168	0.000729663	556.505	0.279931	0.000387191	577.103	0.336558	4.3681e-05	557.301	0.295552	activating transcription factor 7-interacting 1-like	0.9225		unknown
CGI_10009841	0.237184	0.00116798	642.274	0.198022	0.00480512	676.323	0.448785	3.59932e-11	614.894	0.294664	vacuolar sorting-associated 52 homolog isoform X1	0.865		unknown
CGI_10010924	0.219295	0.0463268	643.757	0.227773	0.0282099	667.739	0.433803	5.54884e-05	615.348	0.293624	Large neutral amino acids transporter small subunit 2	0.7715		GO:0005887;GO:0015179;GO:1902475;GO:0015297;GO:0015175;GO:0015804
CGI_10023174	0.197282	0.0158585	419.101	0.38036	1.68771e-06	411.171	0.295484	0.000996117	414.838	0.291042	MACRO domain-containing 2	0.6355		GO:0003676
CGI_10015507	0.198984	0.00337689	1619.53	0.289196	6.99152e-09	1636.23	0.372074	1.31864e-10	1567.66	0.286751	tyrosine- kinase Btk29A isoform X3 [Polistes canadensis]	0.672		GO:0005524;GO:0018108;GO:0004713;GO:0005622;GO:0035556
CGI_10017573	0.377836	9.01829e-05	529.986	0.174863	0.0243198	587.759	0.293021	0.00189942	556.158	0.281907	odr-4 homolog isoform X2	0.626		GO:0016021
CGI_10019442	0.416511	2.03061e-06	377.24	0.20921	0.0486299	418.118	0.21532	0.0231538	410.259	0.280347	serine--pyruvate aminotransferase-like	0.775		GO:0005777;GO:0019265;GO:0016020;GO:0043167;GO:0047304;GO:0004672;GO:0004760;GO:0008453;GO:0006468;GO:0019700
CGI_10005866	0.339844	3.21277e-06	470.031	0.21354	0.00425557	508.54	0.285341	0.000404285	488.716	0.279575	zinc finger 423-like isoform X2	0.6611		GO:0046872
CGI_10010010	0.34424	3.75158e-08	528.578	0.200922	0.00514949	574.789	0.28256	4.53185e-05	550.186	0.275908	ran GTPase-activating 1 isoform X2 [Chrysemys picta bellii]	0.7185		GO:0043229;GO:0007165;GO:0005096;GO:0043547;GO:0008063
CGI_10012025	0.310882	0.00162239	813.899	0.27213	0.00428487	856.735	0.231681	0.0247376	852.851	0.271564	NAD(P)H:quinone oxidoreductase	0.771		GO:0016491;GO:0055114
CGI_10028840	0.289516	0.000320746	1012.58	0.391193	8.48331e-10	1020.89	0.131047	0.0439929	1089.3	0.270586	Transcription factor 25	0.7555		GO:0050794
CGI_10014144	0.224397	0.0441128	252.45	0.341977	0.00137466	252.67	0.242665	0.0183478	256.357	0.26968	hypothetical protein CGI_10014144	1		unknown
CGI_10025909	0.203553	0.0431705	486.927	0.406675	8.16839e-08	475.123	0.190457	0.0264199	499.678	0.266895	SH2 domain-containing 4B-like isoform X2 [Lingula anatina]	0.6935		unknown
CGI_10023882	0.249512	0.00214053	864.543	0.169445	0.0252998	922.748	0.378695	1.79324e-07	848.86	0.265884	cytochrome P450 4F22-like	0.703		GO:0005506;GO:0016705;GO:0016021;GO:0055114;GO:0004497;GO:0020037
CGI_10025768	0.29459	0.00464094	1310.61	0.181014	0.0469515	1413.85	0.320064	0.00185245	1328.63	0.265223	THO complex subunit 4-like	0.764		GO:0000166;GO:0003676
CGI_10008871	0.218287	0.038123	180.991	0.289578	0.0150536	183.809	0.275896	0.00863849	181.487	0.261254	1-acyl-sn-glycerol-3-phosphate acyltransferase alpha	0.716		GO:0003841;GO:0016020;GO:0008654;GO:0000502
CGI_10024836	0.170173	0.0136814	560.183	0.228366	0.000316599	571.647	0.380288	1.91797e-08	535.635	0.259609	Zinc finger PLAG1	0.699		GO:0003676;GO:0005634;GO:0003700;GO:0046872;GO:0006351;GO:0006355
CGI_10013156	0.218477	0.0305185	607.206	0.32244	0.000273253	610.766	0.234652	0.0177844	617.257	0.258523	Biogenesis of lysosome-related organelles complex 1 subunit 1	0.8875		GO:0031083;GO:0005739;GO:0016197
CGI_10019252	0.249144	0.035766	842.764	0.290492	0.0151842	864.69	0.234499	0.0495504	865.329	0.258045	cytosolic Fe-S cluster assembly factor NUBP1	0.873		GO:0005524;GO:0046872;GO:0005829;GO:0051539;GO:0016226
CGI_10005446	0.184845	0.0196572	413.661	0.280752	0.000243509	416.947	0.306213	0.000286804	406.476	0.25727	hypothetical protein CGI_10005446	0.591		unknown
CGI_10026274	0.258421	1.14931e-05	1089.17	0.182427	0.0118634	1160.14	0.321249	1.4176e-06	1091.31	0.254032	26S protease regulatory subunit 6A-B	0.942		GO:0005524;GO:0008540;GO:0031597;GO:0031595;GO:0008233;GO:0017025;GO:0030433;GO:1901800;GO:0036402;GO:0045899
CGI_10008814	0.348021	5.66207e-07	487.289	0.203122	0.00994993	530.139	0.208538	0.00367443	520.039	0.253227	vesicle transport SFT2B isoform X1 [Camponotus floridanus]	0.834		GO:0016192;GO:0016021
CGI_10023833	0.190809	0.0130518	669.781	0.304321	0.00877502	670.978	0.21616	0.0104517	678.716	0.237097	Solute carrier family 25 member 46	0.7035		GO:0061564;GO:0005739;GO:0016021;GO:0043005;GO:0006810;GO:0000266
CGI_10003298	0.197484	0.0172304	445.954	0.183518	0.0257378	465.716	0.327075	0.000222111	437.255	0.236026	pre-mRNA-processing factor 40 homolog B-like	0.8145		unknown
CGI_10008809	0.201407	0.00850727	649.714	0.317441	1.91649e-05	651.086	0.181426	0.0137687	668.118	0.233425	endo16-like 235	0.485		unknown
CGI_10000605	0.21406	0.0383782	569.019	0.218901	0.0356187	590.42	0.265638	0.0050058	571.721	0.232866	Keratinocyte-associated 2	0.7745		GO:0016021
CGI_10028014	0.185382	0.0453764	3703.51	0.230458	0.000772839	3795.4	0.273099	0.000971227	3679.07	0.229646	von Willebrand factor type EGF and pentraxin domain-containing 1-like isoform X2 [Crassostrea gigas]	0.5385		GO:0008061;GO:0006030;GO:0005576
CGI_10019404	0.229553	0.0179266	633.173	0.187519	0.00154932	668.124	0.269164	6.64701e-05	639.245	0.228745	coiled-coil domain-containing 124	0.702		unknown
CGI_10017721	0.230797	0.000446192	1278.78	0.184902	0.0418449	1349.03	0.265818	0.000205143	1292.16	0.227173	probable phospholipid-transporting ATPase IIB isoform X2	0.8555		GO:0006890;GO:0008152;GO:0004012;GO:0006897;GO:0005886;GO:0000287;GO:0005524;GO:0005802;GO:0005768;GO:0048471;GO:0045332;GO:0016021;GO:0072600
CGI_10014058	0.293479	0.000464661	613.806	0.16955	0.0368776	663.974	0.209792	0.0322122	643.752	0.224274	zinc finger MYND domain-containing 12	0.7965		unknown
CGI_10001568	0.249032	0.0208374	666.998	0.203998	0.0120575	703.87	0.215178	0.025618	688.894	0.222736	myomegalin-like isoform X4 [Crassostrea gigas]	0.6925		unknown
CGI_10022743	0.235395	0.00056809	1792.31	0.156746	0.0255478	1911.71	0.244175	0.000745813	1826.25	0.212105	glucose-repressible alcohol dehydrogenase transcriptional effector-like [Crassostrea gigas]	0.6635		unknown
CGI_10003843	0.221069	0.00812078	1792.42	0.18242	0.0156452	1887.51	0.230947	0.00652487	1825.78	0.211479	AB hydrolase superfamily -like	0.689		GO:0008152;GO:0016787
CGI_10017613	0.246917	0.00844263	336.711	0.167263	0.0488763	359.139	0.213098	0.0217375	347.695	0.209093	serine threonine- phosphatase 2A regulatory subunit B subunit gamma isoform X2	0.8855		GO:0048536;GO:0000226;GO:0001782;GO:0045579;GO:0043029;GO:0005634;GO:0030865;GO:0005813;GO:0005737;GO:0046872;GO:0002759;GO:0005819;GO:0032147;GO:0051900
CGI_10025007	0.191048	0.0157432	1023.57	0.19238	0.0323989	1063.54	0.230181	0.00316155	1032.98	0.204536	activating transcription factor 7-interacting 1-like isoform X1 [Aplysia californica]	0.8065		GO:0016021
CGI_10022027	0.24823	4.59929e-05	1771.28	0.165828	0.039728	1890.86	0.199132	0.00922063	1838.35	0.204397	dihydrolipoyllysine-residue succinyltransferase component of 2-oxoglutarate dehydrogenase mitochondrial	0.854		GO:0005634;GO:0004149;GO:0043209;GO:0070062;GO:0045252;GO:0005739;GO:0016020;GO:0006099
CGI_10028835	0.213839	0.00583981	1553.52	0.172957	0.0477503	1636.6	0.214954	0.00923421	1586.74	0.200583	tumor susceptibility gene 101	0.6635		GO:0005768;GO:0005515;GO:0048522;GO:0050792;GO:0015031;GO:0006464;GO:0060627;GO:0051128
CGI_10028528	0.197157	0.0281154	1879.63	0.206282	0.0223588	1948.29	0.179125	0.0413724	1931.72	0.194188	Dihydrolipoyl mitochondrial	0.8055		GO:0005623;GO:0004930;GO:0007186;GO:0050660;GO:0016021;GO:0007166;GO:0045454;GO:0055114;GO:0004148
CGI_10002862	0.190122	0.0107103	1437.21	0.218692	1.21152e-05	1481.13	0.172966	0.00427523	1477.05	0.193927	Hsc70-interacting	0.829		unknown
CGI_10025542	0.180666	0.0171098	725.252	0.172847	0.022855	755.788	0.228039	0.000384221	729.721	0.193851	sedoheptulokinase-like isoform X2 [Athalia rosae]	0.692		GO:0008270;GO:0071310;GO:0016310;GO:0016773;GO:0016301
CGI_10021398	0.211549	0.012583	3373.61	0.20559	0.0190169	3514.08	0.158435	0.0268632	3507.92	0.191858	NADH-ubiquinone oxidoreductase 75 kDa mitochondrial-like	0.85		GO:0072593;GO:0005747;GO:0005758;GO:0043209;GO:0008637;GO:0051881;GO:0009055;GO:0008137;GO:0042773;GO:0051536
CGI_10018262	0.2108	0.000338641	760.412	0.144019	0.0223779	808.253	0.184109	0.00197944	783.884	0.179643	YIPF5 [Clupea harengus]	0.68		GO:0016021
CGI_10023684	0.175812	0.000942814	7340.42	0.195655	1.29934e-05	7583.63	0.163967	0.0113724	7529.08	0.178478	plasma membrane calcium-transporting ATPase 2-like isoform X1 [Parasteatoda tepidariorum]	0.768		GO:0005524;GO:0046872;GO:0008152;GO:0016021;GO:0070588;GO:0005388
CGI_10022952	0.150037	0.0168667	1206.33	0.164251	0.00627056	1248.63	0.19196	0.00475334	1215.78	0.168749	PTB domain-containing engulfment adapter 1-like isoform X1 [Aplysia californica]	0.709		unknown
CGI_10015640	0.165237	0.00616798	829.156	0.17238	0.00280299	859.974	0.165967	0.0128871	846.836	0.167861	Transcriptional adapter 2-beta	0.702		GO:0005634;GO:0003677;GO:0008270;GO:0016573;GO:0006357
CGI_10015083	0.110728	0.0342077	10338.1	0.191571	1.16159e-05	10466.9	0.160747	0.0033441	10390.6	0.154349	zinc finger C3H1 type-like 1	0.6575		GO:0046872;GO:0048513;GO:0044763
CGI_10006257	0.134778	0.0173613	1535.12	0.174781	0.000812829	1575.39	0.127277	0.0294969	1572.82	0.145612	FAM65A-like isoform X1 [Lingula anatina]	0.747		unknown
CGI_10011211	0.149618	0.00788693	2825.86	0.117234	0.0247867	2969.57	0.114115	0.0229755	2921.84	0.126989	casein kinase I isoform alpha isoform X2	0.9645		GO:0005524;GO:0004674;GO:0006468
CGI_10019789	-0.174783	0.00468456	1166.73	-0.122994	0.0318703	1189.93	-0.147113	0.0194682	1180.11	-0.148297	PREDICTED: uncharacterized protein LOC105338113 [Crassostrea gigas]	1		GO:0016021
CGI_10021617	-0.132314	0.0257833	1420.85	-0.174701	0.00370185	1500.45	-0.196874	0.00157272	1486.62	-0.167963	transducin-like enhancer 4 isoform X1	0.8345		GO:0005634;GO:0006355
CGI_10005051	-0.19548	0.000222003	1665.26	-0.13095	0.00939114	1691.28	-0.179674	0.00167005	1691.67	-0.168701	ras-specific guanine nucleotide-releasing factor 2-like isoform X3 [Biomphalaria glabrata]	0.894		GO:0007264;GO:0005085;GO:0005622;GO:0043547
CGI_10012168	-0.196041	0.000148125	2300.69	-0.175556	0.00336486	2374.76	-0.187664	0.000254959	2344.01	-0.18642	branched-chain-amino-acid cytosolic-like	0.808		GO:0052654;GO:0052655;GO:0009082;GO:0052656
CGI_10004085	-0.21621	0.00654612	1282.92	-0.253533	6.8236e-07	1352.63	-0.126589	0.0175542	1267.66	-0.198777	FAM46A [Python bivittatus]	0.8175		unknown
CGI_10016138	-0.177925	0.00207589	1127	-0.268454	3.15624e-06	1211.85	-0.200716	0.000234946	1161.33	-0.215698	neuronal acetylcholine receptor subunit alpha-6-like	0.655		GO:0034220;GO:0016021;GO:0005230
CGI_10008950	-0.292785	5.63031e-06	830.904	-0.146123	0.0390066	818.093	-0.216862	0.004797	825.113	-0.21859	BSD domain-containing 1	0.6305		unknown
CGI_10017041	-0.228963	0.000297106	1535.18	-0.168129	0.0176229	1560.73	-0.274378	2.57299e-05	1595.96	-0.223824	synapse-associated [Aplysia californica]	0.718		GO:0009150;GO:0007010;GO:1901068;GO:0009653;GO:0048513;GO:1902532;GO:0098794;GO:0048522;GO:0043231;GO:0098797;GO:0019900;GO:0051128;GO:0065008;GO:1902589;GO:0043232;GO:0098590;GO:0044444;GO:0002376;GO:0009888;GO:0042127;GO:0001932;GO:0010605;GO:0072657;GO:0030054;GO:0071822;GO:0031324
CGI_10015138	-0.262957	0.000101101	746.975	-0.249503	0.00181566	773.088	-0.160642	0.0443776	734.932	-0.224367	Cytoplasmic phosphatidylinositol transfer 1	0.8245		GO:0006810;GO:0005622
CGI_10012405	-0.173499	0.00935398	780.36	-0.220235	9.31986e-05	825.89	-0.288439	0.000566467	832.769	-0.227391	selenocysteine insertion sequence-binding 2-like	0.7315		GO:0005525;GO:0007264;GO:0015031;GO:0016021;GO:0005622
CGI_10017392	-0.285128	0.000808613	724.522	-0.177943	0.0315208	723.375	-0.220663	0.0079476	722.309	-0.227911	phosphatase 1E	0.693		GO:0004722;GO:0005634;GO:0046872;GO:0006470
CGI_10028273	-0.281918	2.24199e-06	6989.45	-0.148235	0.0191564	6913.16	-0.255468	4.5516e-05	7071.4	-0.22854	quaking-B-like isoform X4	0.698		GO:0006417;GO:0003727
CGI_10025644	-0.261204	9.68822e-05	402.436	-0.248282	0.00503137	416.173	-0.178624	0.0115271	398.647	-0.22937	[Nematostella vectensis]	0.565		GO:0016021
CGI_10012076	-0.255342	0.000114745	1136.1	-0.196288	0.0149419	1155.71	-0.250167	1.3768e-05	1158.36	-0.233932	Mitosis inhibitor kinase wee1 [Crassostrea gigas]	0.499		GO:0005524;GO:0004672;GO:0006468
CGI_10009385	-0.259129	0.000254685	1629.55	-0.227427	3.71826e-05	1674.14	-0.216953	0.00499237	1639.03	-0.234503	hypothetical protein CGI_10009385	1		GO:0016021
CGI_10026426	-0.243557	0.0165484	241.943	-0.213636	0.0313824	248.861	-0.26212	0.0097963	249.116	-0.239771	MAU2 chromatid cohesion factor homolog	0.81		unknown
CGI_10025911	-0.199319	0.00967285	451.916	-0.333905	5.05155e-07	494.643	-0.199587	0.00761586	462.079	-0.24427	ring canal kelch homolog	0.8		unknown
CGI_10008691	-0.197885	0.0317318	699.383	-0.251459	0.00505223	742.132	-0.293302	0.000256348	740.969	-0.247549	sine oculis-binding homolog isoform X1	0.7215		unknown
CGI_10015642	-0.176662	0.0204693	4999.15	-0.335749	1.68006e-10	5519.37	-0.252695	0.00012756	5255.85	-0.255035	cytosolic malate dehydrogenase	0.857		GO:0005975;GO:0005615;GO:0005813;GO:0030060;GO:0043209;GO:0070062;GO:0006108;GO:0005739;GO:0006099;GO:0098779;GO:0002230;GO:0098792
CGI_10026998	-0.266907	0.000102178	1290.16	-0.197455	0.0142394	1307.25	-0.302485	2.74004e-06	1336.44	-0.255616	kinase D-interacting substrate of 220 kDa isoform X4 [Vollenhovia emeryi]	0.659		GO:0016021
CGI_10005931	-0.272095	0.0106025	640.01	-0.270548	0.00217531	664.846	-0.229643	0.00559686	643.149	-0.257429	delta(3,5)-Delta(2,4)-dienoyl- mitochondrial-like	0.7785		GO:0003824;GO:0008152
CGI_10005520	-0.206767	0.00513927	836.997	-0.213859	0.000340427	872.625	-0.356146	1.92643e-07	905.465	-0.258924	transmembrane 145-like	0.64		GO:0007186;GO:0016021;GO:0019236
CGI_10004923	-0.33704	0.00815856	245.488	-0.206117	0.0478243	242.604	-0.242742	0.0321752	241.909	-0.261967	tRNA (uracil-5-)-methyltransferase homolog A	0.6735		GO:0003676;GO:0008173;GO:0001510;GO:0006396
CGI_10013044	-0.271827	0.00570324	959.347	-0.265471	0.00159974	995.435	-0.254572	0.0039836	974.171	-0.263957	hypothetical protein CGI_10013044	0.98		unknown
CGI_10012666	-0.213313	0.00522442	671.577	-0.267113	0.00879815	713.367	-0.319171	4.09781e-06	714.629	-0.266532	advillin [Xenopus tropicalis]	0.565		GO:0051016;GO:0051014;GO:0003779;GO:0005509;GO:0045010
CGI_10007221	-0.306731	0.00392721	1228.95	-0.281435	0.00300204	1265.12	-0.215013	0.0158336	1212.3	-0.267727	sodium-coupled monocarboxylate transporter 2-like	0.6985		GO:0055085;GO:0016021;GO:0005215
CGI_10026700	-0.219355	0.0434756	486.422	-0.209536	0.0389891	503.885	-0.377048	0.000182773	528.412	-0.268647	Receptor-interacting serine threonine- kinase 4 [Crassostrea gigas]	0.614		GO:0016310;GO:0016301
CGI_10024368	-0.291683	0.000547067	1392.94	-0.196482	0.0360002	1397	-0.331804	0.000272628	1445.83	-0.273323	disheveled-associated activator of morphogenesis 1-like isoform X1 [Crassostrea gigas]	0.746		GO:0003779;GO:0017048;GO:0030036
CGI_10009967	-0.191009	0.00348099	1511.16	-0.426178	7.79454e-09	1721	-0.216856	0.00269423	1559.35	-0.278014	lysosomal alpha-glucosidase-like	0.6955		GO:0005975;GO:0004553;GO:0030246
CGI_10003771	-0.380865	0.00159323	573.391	-0.258847	0.00289099	567.871	-0.195595	0.00836022	544.799	-0.278436	Transmembrane 184C	0.7535		GO:0016021
CGI_10018327	-0.371596	6.74854e-08	1454.43	-0.181132	0.0286304	1406.38	-0.290433	0.00932	1441.29	-0.281053	Organic cation transporter [Crassostrea gigas]	0.7005		GO:0055085;GO:0022857;GO:0016021
CGI_10009762	-0.263372	0.0037013	1027.71	-0.286706	0.00121971	1078.16	-0.295047	0.00218253	1063.12	-0.281708	baculoviral IAP repeat-containing 7-like [Octopus bimaculoides]	0.657		GO:0008270;GO:0043066;GO:0042981
CGI_10003854	-0.333777	0.00601878	1340.53	-0.263516	0.0312317	1356.16	-0.257611	0.0293753	1329.65	-0.284968	Adenosine deaminase CECR1	0.7045		GO:0005615;GO:0008083;GO:0005829;GO:0006154;GO:0043103;GO:0046103;GO:0004000
CGI_10005521	-0.169725	0.0345644	380.931	-0.295366	8.30712e-05	415.511	-0.390352	1.27426e-05	423.609	-0.285148	transmembrane 145	0.5295		GO:0016021
CGI_10020230	-0.253515	0.00209066	1399.17	-0.162294	0.0496523	1405.97	-0.440639	6.78606e-07	1538.8	-0.285482	enolase ENO4	0.7755		GO:0000287;GO:0004634;GO:0006096;GO:0000015
CGI_10009538	-0.206316	0.0218119	277.644	-0.399007	9.98242e-07	311.172	-0.253909	0.00885661	288.781	-0.286411	General transcription factor IIF subunit partial	0.678		GO:0097159;GO:1901363;GO:0003824;GO:0005674;GO:0006367
CGI_10005145	-0.257623	0.00307113	265.225	-0.328696	0.000179207	283.458	-0.274907	0.00418093	272.62	-0.287076	piccolo- partial	0.776		GO:0007416;GO:0048786;GO:0007010;GO:0005509;GO:0016020;GO:0005522;GO:0005544
CGI_10009323	-0.336997	2.12456e-07	790.538	-0.244024	0.00102963	793.227	-0.282653	4.87604e-05	791.086	-0.287891	subfamily B member 5	0.6675		unknown
CGI_10009906	-0.241095	0.0144423	401.084	-0.23817	0.0236143	416.466	-0.394149	3.12626e-05	435.001	-0.291138	glucoside xylosyltransferase 1-like isoform X2	0.7355		GO:0016757;GO:0016020;GO:0008152
CGI_10014626	-0.347241	0.00125023	1973.43	-0.277025	0.00537139	1995.81	-0.25008	0.0178855	1941.73	-0.291449	Cubilin	0.6615		GO:0005509
CGI_10026429	-0.230439	0.000915899	842.614	-0.277715	8.15312e-06	892.34	-0.369093	6.00662e-12	908.505	-0.292415	double C2-like domain-containing beta isoform X1 [Crassostrea gigas]	0.7325		GO:0098793;GO:0048791;GO:0031340;GO:0005509;GO:0016020;GO:0032024;GO:0006886;GO:0017137;GO:0045956;GO:0005622;GO:0005544
CGI_10004576	-0.212016	0.0335159	372.625	-0.244226	0.0166056	392.082	-0.425619	9.07632e-07	413.521	-0.293954	coiled-coil domain-containing 33-like	0.7165		unknown
CGI_10009313	-0.257403	0.0142315	572.447	-0.406813	2.69039e-05	631.047	-0.219222	0.0286511	576.636	-0.294479	Ext1b [Danio rerio]	0.7475		GO:0015012;GO:0050508;GO:0050509;GO:0030176;GO:0006024
CGI_10011938	-0.326095	3.85489e-06	392.205	-0.377214	6.77899e-08	416.047	-0.196014	0.0258709	381.471	-0.299774	cyclin-C-like isoform X1	0.874		GO:0005634;GO:0045737;GO:0016538;GO:1901409;GO:0000307;GO:0016310;GO:0045944;GO:0016301
CGI_10026128	-0.289645	3.80618e-05	713.975	-0.313166	3.48161e-05	748.848	-0.313434	9.51559e-05	736.11	-0.305415	hypothetical protein CGI_10026128	0.7083		GO:0016021
CGI_10014643	-0.288758	0.0142376	368.12	-0.357025	0.000119283	393.074	-0.2717	0.00493217	373.79	-0.305828	sodium-dependent lysophosphatidylcholine symporter 1-B-like	0.675		GO:0016021
CGI_10021435	-0.274585	0.0167818	2558.54	-0.283043	0.0224864	2669.6	-0.392691	9.06357e-05	2737.95	-0.316773	glutamate synthase [NADPH] isoform X1 [Bombus terrestris]	0.8005		GO:0000166;GO:0006537;GO:0048037;GO:0043167;GO:0055114;GO:0051536;GO:0045181
CGI_10020074	-0.241743	0.0157624	543.558	-0.385462	2.74496e-06	597.475	-0.33522	0.000613445	575.819	-0.320809	cadherin-like and PC-esterase domain-containing 1 isoform X1 [Lingula anatina]	0.637		unknown
CGI_10019163	-0.271344	0.00886192	423.41	-0.414318	1.41409e-09	465.146	-0.276821	0.000121344	433.186	-0.320828	PREDICTED: uncharacterized protein LOC105329609 [Crassostrea gigas]	0.6243		GO:0016021
CGI_10028455	-0.261584	0.0084785	915.078	-0.348365	2.51921e-05	983.82	-0.353362	2.8496e-08	968.598	-0.321104	ankyrin repeat [Trichomonas vaginalis G3]	0.581		GO:0007165;GO:0000502
CGI_10012476	-0.288725	0.01163	423.66	-0.340138	0.00206749	449.723	-0.335746	0.000626296	440.956	-0.321537	TBC1 domain family member 5-like isoform X1 [Biomphalaria glabrata]	0.7325		unknown
CGI_10015786	-0.28085	0.00957779	897.432	-0.254572	0.0175379	923.933	-0.435951	1.0246e-08	974.277	-0.323791	cadherin EGF LAG seven-pass G-type receptor 3-like [Crassostrea gigas]	0.592		GO:0005509;GO:0016021;GO:0007156;GO:0005886
CGI_10013048	-0.422943	3.24091e-05	154.03	-0.328851	0.00163822	154.31	-0.229921	0.0324643	146.058	-0.327238	lysophosphatidic acid receptor 1	0.6035		GO:0070915;GO:0007186;GO:0001525;GO:0016021;GO:0001946;GO:0060217
CGI_10014033	-0.40788	4.92207e-05	767.677	-0.279905	0.000260014	758.56	-0.334695	0.000115903	761.64	-0.340827	hypothetical protein CGI_10014033	0.7311		unknown
CGI_10025771	-0.182727	0.00796189	1421.62	-0.341861	2.57268e-05	1571.16	-0.499358	1.56744e-15	1643.4	-0.341315	Transmembrane channel 7	0.768		GO:0016021
CGI_10014674	-0.371054	1.29284e-05	690.429	-0.185078	0.042798	668.492	-0.476865	8.20373e-09	736.334	-0.344332	nischarin-like isoform X2	0.616		GO:0005488;GO:0008063
CGI_10019759	-0.565028	1.60336e-15	1959.28	-0.225977	0.00683126	1780.85	-0.254211	0.00707864	1769.42	-0.348405	ankyrin repeat domain-containing SOWAHC-like isoform X2 [Lingula anatina]	0.662		unknown
CGI_10014004	-0.314726	0.00175495	254.145	-0.277217	0.00804659	260.541	-0.457891	3.28523e-07	274.748	-0.349945	lipase maturation factor 1	0.7585		GO:0005789;GO:0019538;GO:0016021;GO:0044763;GO:0019216;GO:0044765
CGI_10028201	-0.307933	0.000666816	346.628	-0.282728	0.00330841	357.211	-0.460622	7.52503e-06	377.001	-0.350428	AAEL002820-PA [Aedes aegypti]	0.541		GO:0016021
CGI_10025569	-0.323229	0.00439554	444.061	-0.427938	5.70657e-06	481.221	-0.308364	0.00343696	451.031	-0.353177	VWFA and cache domain-containing 1	0.7525		GO:0016021
CGI_10017725	-0.370458	0.000263008	265.462	-0.402935	0.000955964	280.012	-0.300671	0.00433106	263.981	-0.358021	hypothetical protein CGI_10017725	0.8429		unknown
CGI_10017658	-0.463415	3.75451e-16	1138.31	-0.275574	5.88211e-06	1099.65	-0.353234	7.59945e-09	1113.43	-0.364074	Ankyrin repeat and kinase domain-containing partial	0.6115		GO:0005524;GO:0004674;GO:0006468
CGI_10019581	-0.379116	0.0326834	93.5321	-0.403644	0.00633691	98.1496	-0.311842	0.045376	93.0448	-0.364867	Neuroglobin [Trichinella pseudospiralis]	0.5585		GO:0019825;GO:0015671;GO:0005344;GO:0020037
CGI_10014288	-0.381193	9.04749e-07	341.514	-0.525806	8.47319e-10	376.909	-0.195188	0.036828	325.021	-0.367396	Kelch 24 [Crassostrea gigas]	0.478		unknown
CGI_10020526	-0.310953	0.00711863	159.063	-0.45198	8.62003e-05	175.019	-0.341226	0.00302636	164.375	-0.368053	neurofascin-like isoform X2	0.8065		GO:0016021
CGI_10025419	-0.317659	0.0193066	98.0343	-0.43562	0.000285393	106.729	-0.35157	0.00693022	101.423	-0.368283	golgin subfamily A member 6 22 isoform X4	0.7865		unknown
CGI_10002447	-0.2954	0.0230929	119.765	-0.387696	0.00407967	129.378	-0.432161	0.00199029	129.333	-0.371752	hypothetical protein CGI_10002447	1		unknown
CGI_10017548	-0.445642	1.66408e-07	1891.83	-0.49068	7.14355e-05	2007.28	-0.182035	0.0441917	1744.82	-0.372786	peptidoglycan binding domain-containing [Actinoplanes N902-109]	0.5935		unknown
CGI_10027144	-0.465216	2.23216e-07	1176.45	-0.289833	0.0197378	1142.25	-0.370247	3.42345e-05	1157.2	-0.375098	nephrin-like isoform X2 [Crassostrea gigas]	0.649		GO:0016021
CGI_10020872	-0.318152	0.00166532	205.343	-0.391573	8.07382e-05	219.591	-0.415952	2.08767e-06	217.959	-0.375226	NADPH-dependent diflavin oxidoreductase 1	0.7525		GO:0043229;GO:0050661;GO:0010181;GO:0005506;GO:0050660;GO:0003958;GO:0055114;GO:0044444;GO:0016226
CGI_10009823	-0.310741	0.00526691	152.09	-0.362006	0.00135583	161.389	-0.456317	2.11817e-05	164.821	-0.376355	Serine protease mitochondrial	0.689		GO:0006508;GO:0004252
CGI_10024752	-0.301677	0.0180161	229.399	-0.370018	0.00384648	245.169	-0.470942	0.00688293	252.105	-0.380879	beta-1,3-galactosyltransferase 1-like [Haplochromis burtoni]	0.615		GO:0016021;GO:0006486;GO:0008378;GO:0005794
CGI_10010687	-0.366807	4.17182e-06	407.638	-0.432688	3.52728e-05	435.363	-0.344825	6.31271e-05	412.906	-0.38144	R3H domain-containing 4-like	0.6665		unknown
CGI_10013986	-0.549579	9.74112e-11	345.031	-0.22305	0.0186641	315.406	-0.378761	3.88457e-05	329.219	-0.383796	ADP-ribosylarginine hydrolase-like isoform X4 [Aplysia californica]	0.7705		GO:0000287;GO:0003875;GO:0031338;GO:0090630;GO:0005096;GO:0012505;GO:0051725;GO:0006886;GO:0017137;GO:0005622
CGI_10012375	-0.406389	2.45644e-06	290.914	-0.420285	2.03892e-05	304.458	-0.325147	0.00280052	287.796	-0.38394	monocarboxylate transporter 12-like	0.544		GO:0055085;GO:0016021
CGI_10016182	-0.319915	0.0342438	288.637	-0.47968	1.60472e-05	319.447	-0.354482	0.000522434	298.314	-0.384692	hypothetical protein CGI_10016182	0.89		GO:0016021
CGI_10027699	-0.361726	5.48282e-05	501.273	-0.378793	3.51495e-07	524.593	-0.413925	0.00026023	523.719	-0.384815	lysoplasmalogenase TMEM86A	0.739		GO:0016021
CGI_10002949	-0.286362	0.00816026	351.695	-0.33112	0.00987436	372.631	-0.538791	2.88026e-07	397.958	-0.385424	hypothetical protein CGI_10002949	0.573		GO:0016021
CGI_10005131	-0.443052	1.41324e-09	385.986	-0.298972	0.000338107	379.285	-0.420291	7.5941e-07	391.075	-0.387438	IAP2 [Anopheles coluzzii]	0.599		GO:0008270
CGI_10013976	-0.413003	9.42028e-05	415.1	-0.269216	0.0163122	408.073	-0.480639	5.38838e-07	435.861	-0.387619	DNA ligase 1-like isoform X1 [Crassostrea gigas]	0.995		unknown
CGI_10028572	-0.294539	0.0084489	440.855	-0.417599	9.52634e-05	481.539	-0.452143	2.60737e-05	479.841	-0.388094	Immunoglobulin superfamily member 10	0.552		GO:0007165;GO:0044421;GO:0008063
CGI_10026342	-0.261209	0.0468185	186.236	-0.382191	0.00219346	203.285	-0.521798	2.8976e-05	211.673	-0.388399	PREDICTED: uncharacterized protein LOC105321585 [Crassostrea gigas]	1		unknown
CGI_10019965	-0.439941	0.00313823	210.981	-0.328907	0.00129191	209.782	-0.397709	0.00529782	211.994	-0.388852	RING finger nhl-1-like	0.7505		GO:0008270;GO:0005622
CGI_10024033	-0.324491	0.044755	1681.32	-0.390664	0.00298546	1793.02	-0.458902	0.000120431	1810.37	-0.391352	betaine--homocysteine S-methyltransferase 1-like	0.7765		GO:0009086;GO:0008270;GO:0005737;GO:0047150;GO:0032259
CGI_10007684	-0.579144	2.83098e-08	369.989	-0.316545	0.00614715	345.851	-0.279788	0.0170389	335.053	-0.391826	Transient receptor potential cation channel subfamily M member 3	0.7925		GO:0005216;GO:0034220;GO:0016021
CGI_10000436	-0.27119	0.01163	189.148	-0.471742	2.92571e-08	213.116	-0.437252	1.64887e-05	206.595	-0.393395	hypothetical protein CGI_10000436	1		unknown
CGI_10017221	-0.345008	5.12577e-05	10657	-0.480843	6.26139e-11	11695.6	-0.361816	1.11908e-06	10960.2	-0.395889	60 kDa SS-A Ro ribonucleo	0.667		GO:0003723;GO:0030529;GO:0006383;GO:0019013;GO:0044763
CGI_10005888	-0.398489	0.000591144	172.568	-0.339323	0.00465836	175.233	-0.45071	3.24669e-05	180.056	-0.396174	valine--tRNA ligase	0.7045		GO:0004832;GO:0005524;GO:0006438;GO:0006450;GO:0002161;GO:0005829
CGI_10022697	-0.762672	1.29598e-21	539.06	-0.212651	0.0100979	447.872	-0.216683	0.00500294	440.607	-0.397335	Transcription termination factor 2	0.6845		GO:0005524
CGI_10006059	-0.322854	5.28272e-09	2541.49	-0.444669	3.28459e-26	2772.04	-0.433113	1.46466e-08	2714.1	-0.400212	insulin-like growth factor-binding complex acid labile subunit	0.5945		GO:0008063
CGI_10023124	-0.514693	0.000332246	1082.92	-0.340205	0.0188953	1048.35	-0.353674	0.0247554	1036.16	-0.402857	alpha-1,6-mannosylglyco 6-beta-N-acetylglucosaminyltransferase A [Mesocricetus auratus]	0.6905		GO:0006487;GO:0005794;GO:0030144
CGI_10003535	-0.436365	3.44895e-11	567.318	-0.35569	2.72688e-07	571.326	-0.418267	1.63405e-08	575.483	-0.403441	cAMP-dependent kinase catalytic subunit-like isoform X3 [Crassostrea gigas]	0.964		GO:0005524;GO:0004674;GO:0006468
CGI_10024737	-0.452521	0.000273015	349.61	-0.422857	1.88362e-06	358.764	-0.342566	0.0020765	341.912	-0.405981	ATP-binding cassette sub-family A member 3	0.6285		GO:0016887;GO:0005524;GO:0006869;GO:0043231;GO:0008152;GO:0016021;GO:0005215
CGI_10028466	-0.549281	6.02172e-08	239.366	-0.322504	0.0203809	227.576	-0.34728	0.00239995	225.695	-0.406355	hypothetical protein CGI_10028466	0.735		unknown
CGI_10028921	-0.574248	5.52878e-06	134.531	-0.341272	0.0160909	127.223	-0.310218	0.0450179	123.717	-0.408579	nuclear receptor subfamily 2 group E member 1-like	0.731		GO:0008270;GO:0021537;GO:0006351;GO:0006355;GO:0043565;GO:0022603;GO:0045664;GO:0048523;GO:0043401;GO:0007610;GO:0042127;GO:0000981;GO:0005634;GO:0048522;GO:0003707
CGI_10021368	-0.238605	0.0141683	482.936	-0.379169	5.00262e-06	530.052	-0.610626	1.44621e-19	572.467	-0.409467	ras-related Rab-11B	0.9875		GO:0006886;GO:0090150;GO:0005525;GO:0006913;GO:0070062;GO:1990126;GO:0001525;GO:0003924;GO:0045054;GO:0045055;GO:0070121;GO:0019003;GO:0016235;GO:0032402;GO:0035773;GO:0007264;GO:0033572;GO:0005886;GO:0001881;GO:2000008;GO:0005815;GO:0005739;GO:0071468;GO:0030054;GO:0030670;GO:0030672;GO:0055038;GO:0044070;GO:2001135;GO:0031489
CGI_10026638	-0.430455	0.000404346	174.972	-0.464549	0.000643582	184.705	-0.337422	0.00689631	172.197	-0.410809	hypothetical protein CGI_10026638	0.95		unknown
CGI_10027099	-0.169725	0.045376	783.804	-0.602893	2.28288e-05	972.016	-0.460356	4.05363e-07	896.935	-0.410991	c-binding -like	0.715		unknown
CGI_10027878	-0.471317	1.66221e-05	441.075	-0.2822	0.0251117	425.536	-0.488084	1.74581e-05	453.984	-0.413867	kyphoscoliosis peptidase-like [Crassostrea gigas]	0.596		unknown
CGI_10010918	-0.574507	2.84518e-07	412.083	-0.373475	0.0014443	394.501	-0.297261	0.012177	376.384	-0.415081	BAI1-associated 3-like	0.6615		unknown
CGI_10010142	-0.435284	1.76834e-06	473.704	-0.383628	8.74784e-07	482.399	-0.436431	8.68313e-09	484.47	-0.418448	parathyroid hormone parathyroid hormone-related peptide receptor-like	0.71		GO:0004999;GO:0007186;GO:0016021;GO:0007166
CGI_10015395	-0.588426	2.55317e-12	1984.73	-0.416206	4.77321e-05	1924.1	-0.265434	0.00743842	1781.92	-0.423356	nucleolar 58-like isoform X2 [Lingula anatina]	0.5585		GO:0008083
CGI_10027160	-0.433182	0.00246139	170.893	-0.449309	0.000215203	178.493	-0.387607	0.00332754	171.39	-0.423366	probable transporter MCH1	0.6255		GO:0055085;GO:0016021
CGI_10027665	-0.561586	6.41775e-06	847.913	-0.230127	0.0350316	771.05	-0.479766	2.09587e-06	836.199	-0.423826	amiloride-sensitive amine oxidase [copper-containing]-like isoform X2 [Crassostrea gigas]	0.718		GO:0009308;GO:0005507;GO:0048038;GO:0008131;GO:0016021;GO:0055114
CGI_10026829	-0.218103	0.024213	295.322	-0.711218	5.12665e-17	374.936	-0.371786	3.77564e-06	319.893	-0.433703	ankyrin repeat [Trichomonas vaginalis G3]	0.515		unknown
CGI_10027956	-0.387123	0.00292874	268.181	-0.593985	1.20527e-05	304.081	-0.323914	0.0170935	267.264	-0.435007	PREDICTED: uncharacterized protein LOC105347973 [Crassostrea gigas]	0.6075		GO:0016021
CGI_10013781	-0.463124	9.59672e-08	1362.47	-0.494012	1.33934e-11	1434	-0.349619	1.56163e-05	1330.14	-0.435585	0	0		unknown
CGI_10008311	-0.514141	0.00583865	81.1312	-0.36951	0.0293147	79.193	-0.437245	0.0129405	80.1284	-0.440299	chloroplast stem-loop binding of 41 kDa chloroplastic-like [Aplysia californica]	0.605		GO:0050662;GO:0003824;GO:0008152
CGI_10001508	-0.640131	4.80677e-06	344.214	-0.343452	0.0130759	316.152	-0.338175	0.0117753	309.848	-0.440586	peroxisomal membrane 11C	0.596		GO:0016559;GO:0005779
CGI_10020257	-0.348514	1.24763e-06	1233.3	-0.451589	1.84313e-14	1335.65	-0.524882	1.73292e-10	1353.49	-0.441662	BAG family molecular chaperone regulator 3-like isoform X2	0.556		unknown
CGI_10025248	-0.490966	1.94385e-05	274.263	-0.37994	0.00481472	272.84	-0.463181	0.000136967	277.378	-0.444696	PREDICTED: uncharacterized protein LOC105333164	0.5425		unknown
CGI_10001584	-0.511318	2.65838e-08	286.654	-0.355572	0.00895898	280.579	-0.468912	1.34055e-06	288.134	-0.445267	sodium- and chloride-dependent glycine transporter 2-like isoform X2 [Tetranychus urticae]	0.7345		GO:0006836;GO:0036233;GO:0060012;GO:0005328;GO:0055085;GO:0015375;GO:0016021;GO:0005886
CGI_10028591	-0.491678	1.47348e-09	510.083	-0.369378	4.70882e-07	504.945	-0.479901	1.29427e-10	518.804	-0.446986	Transcription regulator BACH1	0.892		GO:0005488
CGI_10004318	-0.290665	0.0127685	235.439	-0.495619	1.53417e-06	265.878	-0.559264	2.50119e-08	268.203	-0.448516	PREDICTED: uncharacterized protein LOC105319668 [Crassostrea gigas]	0.6625		unknown
CGI_10019815	-0.284012	0.00487386	270.731	-0.542457	4.1237e-07	312.412	-0.534565	2.32615e-09	305.838	-0.453678	transmembrane 160-like	0.585		GO:0050909;GO:0016021
CGI_10028163	-0.568635	8.41421e-10	352.441	-0.276928	0.0480672	326.492	-0.526142	3.74984e-08	354.213	-0.457235	beta-hexosaminidase subunit beta-like	0.6985		GO:0005975;GO:0004563
CGI_10025787	-0.702215	0.000456056	514.254	-0.297	0.0192857	447.692	-0.376394	0.0237063	454.914	-0.458536	hypothetical protein CGI_10025787	1		GO:0016021
CGI_10010936	-0.501846	0.00214072	23426.4	-0.553293	0.000101456	24859.8	-0.327447	0.0310685	22263.3	-0.460862	Collagen alpha-1(XIV) chain [Crassostrea gigas]	0.5505		GO:0008061;GO:0005581;GO:0006030;GO:0005576
CGI_10026571	-0.531117	6.3475e-09	290.402	-0.392854	0.00469179	286.387	-0.486003	3.38827e-06	291.632	-0.469991	holine Receptor [Caenorhabditis elegans]	0.586		GO:0034220;GO:0016021;GO:0005230
CGI_10015845	-0.52176	1.39435e-07	1900.13	-0.544237	6.31408e-06	1996.59	-0.362885	0.000178959	1820.69	-0.476294	[Nematostella vectensis]	0.6235		unknown
CGI_10018190	-0.353717	0.0422889	607.787	-0.756203	1.18394e-08	748.373	-0.330534	0.00196333	613.841	-0.480151	hypothetical protein CGI_10018190	0.66		GO:0016021
CGI_10016171	-0.28515	0.0405655	278.425	-0.366026	0.000674269	298.918	-0.795202	6.27258e-18	351.926	-0.482126	beta-amyrin 28-oxidase-like isoform X1 [Aplysia californica]	0.6105		GO:0005506;GO:0016705;GO:0055114;GO:0004497;GO:0020037
CGI_10000712	-0.447236	0.000131513	502.933	-0.31725	0.0074637	496.431	-0.685766	1.70914e-15	567.273	-0.483417	hypothetical protein CGI_10000712	0.7814		GO:0016021
CGI_10021403	-0.321411	0.0192635	153.749	-0.567937	6.13694e-05	177.011	-0.570818	5.94996e-05	174.024	-0.486722	N-acetylgalactosaminyltransferase 7	0.726		GO:0016757;GO:0016021;GO:0006486;GO:0000139;GO:0030246
CGI_10022883	-0.515057	3.81159e-07	947.599	-0.604955	2.37231e-17	1021.73	-0.34202	0.00183993	903.125	-0.487344	CREB ATF bZIP transcription factor isoform X1	0.68		GO:0005634;GO:0003700;GO:0043565;GO:0051090
CGI_10021235	-0.693266	1.35678e-24	635.864	-0.529597	2.08929e-13	617.054	-0.254639	0.000175828	543.797	-0.4925	hydroxypyruvate isomerase	0.792		GO:0008033;GO:0016020;GO:0008168;GO:0016853;GO:0032259
CGI_10008201	-0.377148	0.000966238	309.855	-0.468441	6.58256e-06	334.336	-0.632639	1.25854e-12	351.728	-0.492743	von Willebrand factor type EGF and pentraxin domain-containing 1	0.496		GO:0005509;GO:0016021
CGI_10014713	-0.442992	0.000891201	599.27	-0.378021	0.0236062	607.723	-0.668896	5.52067e-07	674.25	-0.496636	sorting nexin-5-like	0.6055		GO:0044425
CGI_10000770	-0.640698	0.000939686	390.203	-0.3882	0.00366063	362.203	-0.483341	6.28322e-05	369.872	-0.50408	hypothetical protein CGI_10000770	0.735		unknown
CGI_10019520	-0.671114	9.26843e-07	133.753	-0.277126	0.038126	118.05	-0.568223	1.07161e-05	130.796	-0.505488	protocadherin Fat 4-like	0.5025		GO:0005509;GO:0016021;GO:0007156;GO:0005886
CGI_10018092	-0.342182	0.0133276	108.976	-0.367007	0.00897607	114.425	-0.807576	7.59866e-13	135.609	-0.505589	transcription termination factor mitochondrial-like	0.6025		GO:0005739;GO:0003690;GO:0006355
CGI_10025716	-0.684726	8.03063e-27	569.334	-0.461863	3.08001e-10	539.519	-0.371678	1.43628e-07	511.354	-0.506089	hypothetical protein CGI_10025716	0.812		unknown
CGI_10012052	-0.306119	0.0382839	180.852	-0.776446	4.7195e-09	229.33	-0.436083	0.00271219	194.885	-0.506216	hypothetical protein CGI_10012052	0.4628		unknown
CGI_10003212	-0.627657	9.77825e-05	149.084	-0.559729	1.44821e-05	150.117	-0.348765	0.0188765	135.377	-0.51205	Transforming acidic coiled-coil-containing partial	0.625		unknown
CGI_10006572	-0.41087	0.000529105	128.51	-0.438913	0.000128326	135.103	-0.688562	5.83272e-08	147.867	-0.512782	elongator complex 4-like	0.6795		GO:0005634;GO:0033588;GO:0006355
CGI_10022484	-0.507094	8.5192e-05	216.572	-0.580956	8.32442e-09	231.918	-0.460137	3.0572e-05	216.593	-0.516062	multiple epidermal growth factor-like domains 10	0.8275		GO:0004725;GO:0016021;GO:0035335
CGI_10016852	-0.473912	0.000240755	126.276	-0.612335	7.36818e-06	139.303	-0.480054	0.000819435	129.461	-0.5221	muscle M-line assembly unc-89-like [Biomphalaria glabrata]	0.68		unknown
CGI_10001529	-0.511602	0.000146957	136.487	-0.497052	0.00201986	141.282	-0.558683	3.24192e-05	142.305	-0.522446	coiled-coil domain-containing 12	0.8145		unknown
CGI_10009309	-0.521103	0.00188664	653.543	-0.441915	0.0129479	657.689	-0.607763	1.11298e-05	691.469	-0.523594	short-chain collagen C4-like	0.804		GO:0005581
CGI_10018043	-0.555411	3.75158e-08	534.864	-0.248282	0.000312438	491.201	-0.77108	5.83232e-20	598.998	-0.524924	organic cation transporter -like [Crassostrea gigas]	0.6175		GO:0055085;GO:0022857;GO:0016021
CGI_10012493	-0.749423	2.03034e-26	569.677	-0.35861	9.1007e-07	503.519	-0.467111	5.36703e-09	517.116	-0.525048	spastin isoform X3	0.75		GO:0000166;GO:0005634;GO:0015630;GO:0044430;GO:0016020;GO:0031122;GO:0008568
CGI_10011691	-0.538798	1.03549e-05	199.239	-0.639729	1.15525e-09	216.115	-0.400927	0.000399622	192.346	-0.526485	phosphorylated CTD-interacting factor 1-like	0.7685		unknown
CGI_10025853	-0.98875	1.11295e-23	1085.56	-0.24	0.000472667	820.513	-0.357186	7.76562e-10	843.166	-0.528646	hypothetical protein CGI_10025853	0.519		unknown
CGI_10001384	-0.544592	1.05844e-05	162.603	-0.678494	1.75546e-07	179.192	-0.364816	0.00291342	154.44	-0.529301	PARP domain-containing	0.646		GO:0034641;GO:0005488;GO:0044238;GO:0003950;GO:0034645
CGI_10021180	-0.628077	9.11432e-05	374.051	-0.343688	0.023451	344.948	-0.628749	9.66569e-07	381.191	-0.533505	multiple epidermal growth factor-like domains 10	0.8205		unknown
CGI_10017595	-0.323143	0.0289521	290.251	-0.472345	0.00065926	320.499	-0.806439	4.04715e-09	364.286	-0.533976	sodium-coupled monocarboxylate transporter 1-like	0.5665		GO:0055085;GO:0016021;GO:0005215
CGI_10014660	-0.367194	0.0148134	75.1792	-0.627004	3.63796e-06	86.8832	-0.612179	5.50557e-05	85.1505	-0.535459	UPF0573 C2orf70 homolog	0.7885		unknown
CGI_10011226	-0.596895	0.00182887	374.139	-0.54378	0.00132954	379.276	-0.466711	0.0100667	361.028	-0.535795	short-chain collagen C4-like	0.8555		GO:0005581
CGI_10027248	-0.875066	2.28582e-16	136.214	-0.374172	0.00170226	114.398	-0.364784	0.00483123	112	-0.538007	Gamma-glutamyltranspeptidase 1	0.956		GO:0006749;GO:0016021;GO:0003840
CGI_10018993	-0.368832	0.00899549	446.689	-0.560349	0.000337556	503.326	-0.715144	1.40349e-07	528.44	-0.548108	excitatory amino acid transporter-like [Crassostrea gigas]	0.6305		GO:0006835;GO:0055085;GO:0017153;GO:0016021
CGI_10002452	-0.597507	0.00138352	92.929	-0.634233	0.000433644	98.1401	-0.415596	0.0438891	87.9776	-0.549112	TM2 domain-containing CG11103-like	0.808		GO:0016021
CGI_10021092	-0.284133	0.0110551	219.178	-0.810851	1.40635e-14	284.318	-0.55446	0.000135467	250.33	-0.549815	Cytoplasmic phosphatidylinositol transfer 1	0.556		GO:0016021
CGI_10028559	-0.306428	0.0420114	221.421	-0.53446	1.36128e-05	252.399	-0.815296	1.18606e-16	279.537	-0.552061	cereblon-like isoform X3 [Octopus bimaculoides]	0.699		GO:0007275;GO:0006508;GO:0004176
CGI_10026631	-0.425238	0.00524123	948.328	-0.409925	0.0274164	981.883	-0.846588	2.86883e-08	1165.81	-0.560584	reticulocyte-binding 2 homolog a-like	0.59		GO:0042981
CGI_10003945	-0.495552	5.68141e-05	560.142	-0.429917	9.82422e-05	566.715	-0.773042	8.10815e-13	644.482	-0.56617	circularly permutated Ras 1-like	0.5985		GO:0005525;GO:0008270;GO:0006888;GO:0007264;GO:0006886;GO:0030127
CGI_10017158	-0.206331	0.0068704	740.314	-0.793018	2.19632e-25	979.004	-0.700081	7.67681e-10	926.189	-0.566477	von Willebrand factor A domain-containing 7-like	0.6165		GO:0016021
CGI_10028657	-0.696134	5.23538e-07	959.894	-0.666553	5.36033e-05	988.126	-0.34094	0.0450246	845.714	-0.567876	ATP-binding cassette sub-family G member 8	0.6505		GO:0016887;GO:0065007;GO:0005524;GO:0008152;GO:0016021
CGI_10004044	-0.478356	0.0466503	31.588	-0.608839	0.0071693	34.788	-0.622215	0.00789903	34.4986	-0.569803	hypothetical protein CGI_10004044	1		unknown
CGI_10009324	-0.359718	0.0259586	199.364	-0.622893	2.36206e-05	231.434	-0.737414	1.82358e-06	239.704	-0.573341	hypothetical protein CGI_10009324	1		unknown
CGI_10024632	-0.537738	0.000737589	56.2	-0.742757	2.00549e-06	63.9791	-0.442474	0.00771887	55.2506	-0.574323	integrin-linked kinase-associated serine threonine phosphatase 2C isoform X2	0.7315		GO:0004722;GO:0007229;GO:0046872;GO:0006470;GO:0033262;GO:0016310;GO:0016301
CGI_10005450	-0.731375	0.000174441	125.126	-0.448255	0.0390056	114.837	-0.545008	0.00902362	117.628	-0.574879	leucine-rich repeat-containing 32	0.566		GO:0016021
CGI_10001528	-0.508969	0.00086681	118.15	-0.466867	0.00153391	120.567	-0.761178	2.76233e-06	134.883	-0.579005	ankyrin repeat [Trichomonas vaginalis G3]	0.6725		GO:0016021
CGI_10024686	-0.623859	3.80631e-06	195.652	-0.447659	0.000353581	188.946	-0.667155	1.22649e-08	203.727	-0.579558	PREDICTED: uncharacterized protein LOC105320840 [Crassostrea gigas]	1		unknown
CGI_10004046	-1.00977	3.16672e-14	228.735	-0.410945	0.00300559	182.383	-0.321896	0.00704406	172.772	-0.580871	unc-79 homolog	0.7265		unknown
CGI_10026215	-0.661831	0.000141189	68.6817	-0.544114	0.00553433	67.8991	-0.554407	0.00879291	67.2109	-0.586784	Lupus brain antigen 1	0.7475		GO:0005524;GO:0007229
CGI_10018473	-0.587584	0.000287126	89.8833	-0.471961	0.0020657	88.9952	-0.701483	4.24579e-06	96.6604	-0.587009	hypothetical protein CGI_10018473	0.9567		GO:0046872;GO:0007165
CGI_10023354	-0.74344	3.91475e-06	475.587	-0.576962	0.000352508	459.377	-0.444862	0.0109663	427.216	-0.588421	teneurin-2 [Salpingoeca rosetta]	0.593		unknown
CGI_10023241	-0.322873	1.53535e-05	2414.29	-0.849594	9.05155e-32	3131.25	-0.595864	2.57062e-14	2756.34	-0.589444	Endo-1,3(4)-beta-glucanase 1	0.6275		GO:0052861;GO:0008152
CGI_10023658	-0.90985	9.22469e-25	431.453	-0.459629	1.07052e-05	369.402	-0.420001	0.000344259	357.486	-0.596493	phytanoyl- dioxygenase 1-like	0.811		GO:0016021
CGI_10024856	-0.570919	5.64745e-06	238.32	-0.62885	1.42603e-08	253.81	-0.597926	1.63439e-09	246.197	-0.599232	protocadherin Fat 4-like	0.4915		unknown
CGI_10026658	-0.514794	0.00886849	149.807	-0.718585	1.10523e-05	169.736	-0.566314	0.00207729	156.366	-0.599897	Transmembrane 2	0.5715		GO:0016021
CGI_10013480	-0.691824	3.67734e-07	404.401	-0.572998	8.19364e-06	399.139	-0.541191	0.000363447	387.912	-0.602005	Locomotion-related Hikaru genki	0.6295		unknown
CGI_10017662	-0.499936	6.6936e-05	264.288	-0.903238	1.56193e-15	327.805	-0.406983	0.000587651	259.842	-0.603386	Dehydrogenase reductase SDR family member 1	0.7715		GO:0016491;GO:0005739;GO:0055114
CGI_10005128	-0.804344	3.30869e-07	722.283	-0.533175	0.000159829	665.361	-0.475729	0.00238922	638.793	-0.604416	ankyrin repeat and KH domain-containing 1-like	0.713		GO:0005524
CGI_10001430	-0.727498	1.27952e-11	619.382	-0.643386	3.42384e-10	620.663	-0.449345	1.53026e-05	562.46	-0.606743	Thymus-specific serine protease	0.7035		GO:0006508;GO:0016021;GO:0008236;GO:0005773;GO:0008238
CGI_10011889	-0.521843	0.00302128	183.594	-0.44291	0.0150041	185.013	-0.866307	1.52292e-07	219.246	-0.610353	[Nematostella vectensis]	0.6425		unknown
CGI_10015071	-0.772525	0.000120977	50.2496	-0.567365	0.00174773	47.6115	-0.498533	0.00791724	45.4496	-0.612808	hypothetical protein CGI_10015071	1		unknown
CGI_10015334	-0.58614	1.34265e-07	179.544	-0.833075	6.98973e-13	208.44	-0.43046	0.000184708	172.078	-0.616558	WD repeat-containing partial	0.901		GO:0042384;GO:0005929;GO:0030991;GO:0035721
CGI_10027534	-0.700087	1.71992e-12	903.271	-0.532918	1.51553e-05	876.004	-0.61684	3.84104e-07	892.307	-0.616615	[Nematostella vectensis]	0.5555		GO:0016021
CGI_10024794	-0.760407	1.42482e-18	317.924	-0.583205	1.03871e-10	306.174	-0.529489	4.72014e-08	294.323	-0.624367	adipocyte plasma membrane-associated	0.699		GO:0016788;GO:0016844;GO:0016021;GO:0044464;GO:0009058;GO:0043227
CGI_10027932	-0.674298	2.2738e-05	60.4688	-0.694383	2.18502e-05	63.5332	-0.519182	0.00116917	57.741	-0.629288	glucocorticoid modulatory element-binding 1-like	0.5875		GO:0005634;GO:0003677;GO:0003713;GO:1903506
CGI_10004741	-0.32949	0.0467321	204.305	-0.745331	2.31018e-13	252.194	-0.818458	3.457e-12	256.303	-0.631093	estrogen sulfotransferase-like	0.7305		GO:0007229;GO:0008152;GO:0008146;GO:0007155;GO:0008305
CGI_10025629	-0.679451	5.99305e-05	238.973	-0.606434	0.00591131	242.073	-0.610054	0.00438883	238.103	-0.63198	Lupus brain antigen 1	1		unknown
CGI_10020275	-0.768609	1.01303e-07	70.3687	-0.429303	0.00896307	63.2761	-0.707883	7.96269e-07	70.0227	-0.635265	NACHT and WD repeat domain-containing 1	0.6		unknown
CGI_10009864	-1.39757	1.05628e-47	345.819	-0.24437	0.0357691	214.211	-0.291455	0.00961663	214.403	-0.644465	carbonic anhydrase-related 10-like	0.707		unknown
CGI_10020837	-0.901561	1.56047e-15	535.286	-0.407124	0.000805359	449.695	-0.63607	8.90452e-08	486.166	-0.648252	Neurogenic locus Notch	0.6015		GO:0005509;GO:0016021
CGI_10025091	-0.591235	9.00158e-05	139.607	-0.767122	4.09782e-10	156.471	-0.606007	2.10448e-05	143.616	-0.654788	Multiple epidermal growth factor-like domains 10	0.6055		GO:0016021
CGI_10014495	-0.915202	4.37758e-20	243.054	-0.491953	3.80717e-06	210.47	-0.562738	6.82347e-10	212.874	-0.656631	Beta-glucuronidase	0.765		GO:0005975;GO:0004566;GO:0005764
CGI_10018277	-0.830874	2.94798e-19	620.305	-0.821069	2.70792e-17	642.603	-0.330789	0.000135932	513.272	-0.660911	penicillin-binding 4-like isoform X1	0.6055		unknown
CGI_10006882	-0.773999	3.25665e-05	90.8229	-0.663569	9.48536e-05	89.461	-0.547484	0.000764553	83.5622	-0.661684	FAD NAD(P)-binding oxidoreductase	0.573		GO:0016491;GO:0055114
CGI_10011970	-0.666551	1.40309e-15	452.765	-0.564497	1.7312e-11	450.672	-0.759197	6.21405e-19	481.832	-0.663415	Lysosomal thioesterase PPT2	0.62		GO:0008474;GO:0098734;GO:0016021;GO:0043227
CGI_10007498	-0.611816	0.00129731	524.156	-0.614233	0.000385208	544.691	-0.771992	1.30267e-08	571.704	-0.666014	PREDICTED: uncharacterized protein LOC105346920 [Crassostrea gigas]	0.579		unknown
CGI_10013573	-0.428633	0.0240408	165.941	-0.664491	1.42986e-05	190.454	-0.908992	5.72972e-09	209.535	-0.667372	receptor-type tyrosine- phosphatase epsilon-like	0.8095		GO:0004725;GO:0035335
CGI_10007415	-0.421525	0.00801804	315.526	-1.05875	2.68291e-19	434.274	-0.535184	0.000209491	337.926	-0.671818	3-demethylubiquinone-9 3-methyltransferase [Crassostrea gigas]	0.689		GO:0008168;GO:0032259
CGI_10011399	-0.55566	0.0261651	241.183	-0.988985	1.88236e-08	303.676	-0.471231	0.00938209	235.843	-0.671958	hypothetical protein CGI_10011399	0.5386		GO:0016021
CGI_10010362	-0.855539	2.20663e-07	54.8252	-0.645579	0.000294062	51.8872	-0.522318	0.0030641	48.3708	-0.674479	neurogenic locus notch homolog 1-like	0.7455		unknown
CGI_10004291	-1.14268	2.18111e-20	156.975	-0.288813	0.0268255	112.019	-0.593767	4.35314e-06	124.873	-0.675086	B(0,+)-type amino acid transporter 1	0.7355		GO:0015807;GO:0016021;GO:0015171;GO:0003333
CGI_10006788	-0.482646	0.0410627	28.555	-0.529246	0.0154023	30.1916	-1.01358	5.46788e-05	37.9381	-0.675157	[Nematostella vectensis]	0.595		GO:0007165
CGI_10011969	-0.747144	0.00149368	74.4076	-0.676119	0.000858866	74.3382	-0.618819	0.00730737	71.6729	-0.680694	Lysosomal thioesterase PPT2	0.639		GO:0008474;GO:0098734;GO:0016021;GO:0043227
CGI_10005210	-0.678046	0.000327811	95.4336	-0.647658	2.55527e-05	97.5756	-0.725234	2.19191e-06	99.027	-0.683646	cat eye syndrome critical region 6-like [Lingula anatina]	0.72		GO:0016021
CGI_10001936	-0.664154	5.30842e-11	698.455	-0.716396	2.02498e-14	742.301	-0.671218	6.94154e-13	715.452	-0.683923	L-threonine 3- mitochondrial-like	0.857		GO:0050662;GO:0003824;GO:0008152
CGI_10009145	-0.475472	0.000414624	462.522	-0.514145	6.19422e-13	487.169	-1.08386	2.47421e-16	621.962	-0.69116	hypothetical protein CGI_10009145	0.7225		unknown
CGI_10001639	-0.514541	0.0174905	69.0334	-0.670991	0.000250577	76.7841	-0.889442	5.28444e-07	83.5005	-0.691658	PREDICTED: uncharacterized protein LOC105343036 isoform X1	0.7085		GO:0016021
CGI_10017133	-0.518882	4.79297e-06	186.643	-1.24998	1.60016e-26	271.87	-0.321993	0.0089632	176.015	-0.696952	rab5 GDP GTP exchange factor-like isoform X2	0.803		GO:0003677;GO:0008270;GO:0048585;GO:0016021;GO:0051051;GO:0048523;GO:0002683;GO:0009966
CGI_10006348	-0.692015	0.00688051	23.3417	-0.698154	0.00675869	24.3238	-0.739363	0.00440205	24.4328	-0.709844	LDLR chaperone MESD	0.829		unknown
CGI_10019996	-0.906117	2.33999e-05	39.2471	-0.550544	0.0141164	34.4618	-0.685699	0.00244105	36.0473	-0.71412	mucin-3A-like isoform X1	0.96		GO:0016021
CGI_10024131	-0.965188	4.31624e-07	56.4804	-0.723461	6.32277e-05	52.2456	-0.458606	0.0240145	45.7312	-0.715752	L-seryl-tRNA(Sec) kinase	0.6835		GO:0016310;GO:0016301
CGI_10020668	-0.738185	5.50752e-05	52.2126	-0.692435	0.000151083	53.0437	-0.716879	0.000585229	53.0323	-0.715833	probable transporter mch1	0.5255		GO:0055085;GO:0016021
CGI_10017501	-0.766135	0.000185341	96.0534	-0.829961	4.64241e-05	102.887	-0.557095	0.0242797	89.5638	-0.71773	formin 7 isoform X1 [Crassostrea gigas]	0.73		unknown
CGI_10024278	-0.553291	0.0263881	81.35	-0.846006	5.89593e-07	95.882	-0.75725	1.33586e-05	90.4185	-0.718849	Peroxisomal sarcosine oxidase	0.601		GO:0005777;GO:0050031;GO:0008115;GO:0055114;GO:0005102;GO:0033514
CGI_10022721	-0.503243	0.00023167	146.684	-0.745193	2.53916e-10	169.185	-0.92088	2.06264e-12	180.387	-0.723105	Polycystic kidney disease 1-like 2	0.6635		GO:0005509;GO:0016021
CGI_10019755	-0.904544	2.76622e-12	165.087	-0.514154	0.00014591	144.5	-0.768967	5.25306e-08	158.734	-0.729222	hypothetical protein CGI_10019755	1		unknown
CGI_10013556	-0.900561	5.79901e-09	176.986	-0.506039	0.00114849	154.308	-0.811725	2.37568e-07	173.69	-0.739442	ATP-dependent DNA helicase Q-like SIM	0.7645		unknown
CGI_10007982	-0.797011	8.87329e-06	67.7709	-0.467502	0.0231517	60.8636	-0.963541	3.78905e-08	75.0516	-0.742685	Transient receptor potential cation channel subfamily M member 3	0.728		GO:0005216;GO:0034220;GO:0016021
CGI_10015080	-0.78658	0.00092949	27.8898	-0.858289	0.000273442	30.0339	-0.587303	0.0302344	26.1306	-0.744057	guanine nucleotide-binding subunit beta 1	0.6015		unknown
CGI_10020712	-0.8449	2.78003e-15	329.987	-0.758927	7.73547e-13	329.985	-0.630863	6.4456e-10	306.609	-0.744897	dehydrogenase reductase SDR family member 1-like	0.7435		GO:0016491;GO:0043231;GO:0055114;GO:0044444
CGI_10002227	-0.890791	6.49668e-14	204.122	-0.881885	1.95748e-11	211.976	-0.473056	0.000995067	173.985	-0.748577	Kinesin KIF6	0.788		GO:0005524;GO:0003777;GO:0008152;GO:0007018;GO:0005874;GO:0008017
CGI_10023644	-0.519736	0.0446637	32.0542	-0.876825	0.000175502	39.2756	-0.850432	5.70527e-05	37.7977	-0.748997	arylsulfatase I-like	0.685		GO:0003824
CGI_10001876	-0.629255	0.0069819	35.4236	-0.462274	0.0491556	34.1902	-1.16536	4.24442e-11	46.397	-0.752297	acyl-coenzyme A amino acid N-acyltransferase 2-like isoform X2 [Crassostrea gigas]	0.6815		GO:0006637;GO:0016790
CGI_10000988	-0.590304	0.0159637	38.0992	-0.973779	0.000517957	48.4286	-0.70025	0.00550215	40.9672	-0.754778	short-chain collagen C4-like	0.8215		GO:0005581
CGI_10015397	-0.355467	0.000453461	856.179	-1.09896	1.40374e-24	1235.63	-0.812865	1.24465e-18	1060.79	-0.755763	Sialate O-acetylesterase	0.641		unknown
CGI_10023258	-0.85946	8.45619e-05	27.1516	-0.814993	0.000546279	27.8223	-0.624851	0.0102703	24.9685	-0.766434	UPF0046 -like	0.571		GO:0008152;GO:0016787
CGI_10005752	-0.654814	4.56081e-07	143.115	-0.752544	6.53798e-12	155.183	-0.903712	3.95543e-13	163.734	-0.770357	Phytanoyl- hydroxylase-interacting	0.6465		GO:0042450;GO:0004056
CGI_10028547	-0.849614	1.88302e-06	46.2563	-0.806006	6.78509e-06	47.1819	-0.666761	0.000422033	43.507	-0.774127	thyroid hormone receptor alpha isoform X2	0.667		GO:0004887;GO:0005634;GO:0008270;GO:0006351;GO:0003707;GO:0006355;GO:0043565;GO:0043401;GO:0030522
CGI_10001524	-0.872501	7.0354e-05	28.4755	-0.723111	0.00204055	27.7001	-0.730256	0.00148744	27.297	-0.775289	[Nematostella vectensis]	0.607		unknown
CGI_10001462	-0.844149	2.20238e-05	275.21	-1.03928	1.16952e-06	316.317	-0.442481	0.0125186	234.097	-0.775302	receptor-type tyrosine- phosphatase T-like	0.6635		GO:0004725;GO:0035335
CGI_10024422	-0.69228	0.000314876	68.1238	-0.534968	0.0010386	65.8791	-1.10524	2.8109e-10	84.5952	-0.777494	hypothetical protein CGI_10024422	0.671		GO:0016021
CGI_10001530	-0.708047	8.84471e-06	484.16	-0.792646	3.17588e-07	522.906	-0.836807	6.63375e-11	522.512	-0.779167	#NAME?	0.7045		GO:0003810;GO:0018149
CGI_10004173	-0.705573	3.37673e-05	77.747	-0.592696	0.00169359	77.1008	-1.04186	5.80429e-12	92.7798	-0.780045	hypothetical protein CGI_10004173	0.8333		GO:0016021
CGI_10009042	-0.951464	6.22698e-13	156.129	-0.622883	0.000188708	140.488	-0.778425	1.81446e-06	148.059	-0.784257	hypothetical protein CGI_10009042	1		GO:0016021
CGI_10001217	-0.908949	1.74303e-10	544.529	-0.620078	1.67095e-05	497.015	-0.828734	9.02423e-10	535.59	-0.785921	Pogo transposable element with ZNF domain	0.7495		GO:0046872
CGI_10002938	-1.12871	1.03455e-13	136.1	-0.712356	1.19628e-05	116.306	-0.525457	0.00456208	105.562	-0.78884	Sulfotransferase 1C4 [Crassostrea gigas]	0.7145		GO:0007229;GO:0008152;GO:0008146;GO:0007155;GO:0008305
CGI_10014822	-0.801195	0.000519367	28.0805	-1.02357	1.72378e-06	32.6137	-0.545776	0.0424998	25.7984	-0.790182	hypothetical protein CGI_10014822	1		GO:0016021
CGI_10021018	-0.888704	4.77577e-13	287.079	-1.07142	2.86169e-24	324.311	-0.427729	9.29317e-06	239.614	-0.79595	aldose 1-epimerase-like	0.644		GO:0005975;GO:0016021;GO:0030246;GO:0016853
CGI_10023681	-0.906591	0.000430312	22.0819	-0.595094	0.0339294	19.771	-0.899642	0.000348821	22.4023	-0.800442	BTB and MATH domain-containing 36	0.7525		unknown
CGI_10017516	-0.657394	0.00111181	48.426	-0.732533	9.93247e-05	51.96	-1.02619	1.35695e-09	58.6369	-0.805373	Leucine-rich repeat-containing 43	0.8475		unknown
CGI_10001827	-0.865929	0.000191381	31.3761	-0.772308	0.0380119	32.4663	-0.784027	0.00324019	31.1196	-0.807422	Kazal-type serine protease inhibitor domain-containing	0.5935		GO:0006508;GO:0008233
CGI_10011154	-0.61331	0.000826234	41.842	-0.513666	0.0327117	41.804	-1.30049	3.01159e-12	59.7916	-0.809155	N-sulphoglucosamine sulphohydrolase-like	0.801		GO:0070062;GO:0005515;GO:0008484;GO:0030201;GO:0005764
CGI_10023870	-0.442487	0.0262842	59.7417	-1.16015	5.78188e-09	87.2296	-0.839297	8.62556e-08	72.6672	-0.813978	lipid phosphate phosphohydrolase 3-like [Crassostrea gigas]	0.496		GO:0008152;GO:0016021;GO:0009987;GO:0016787
CGI_10011173	-0.849185	1.14058e-05	44.625	-0.415897	0.0424629	38.2283	-1.17862	7.97736e-12	53.3097	-0.814567	atrial natriuretic peptide receptor 1-like	0.592		GO:0005524;GO:0006182;GO:0016021;GO:0004383;GO:0004672;GO:0006468;GO:0005622;GO:0035556
CGI_10023828	-0.970031	2.22879e-06	54.3768	-0.741494	7.84639e-05	50.4656	-0.733411	0.000139372	49.3785	-0.814979	hypothetical protein CGI_10023828	1		unknown
CGI_10018342	-0.882635	0.000174215	27.898	-0.53938	0.0434502	24.8082	-1.06912	0.000106313	31.9729	-0.830377	apolipophorin precursor	0.6883		GO:0006869;GO:0005319
CGI_10006908	-0.876662	1.47422e-10	236.416	-0.959657	4.93468e-14	255.28	-0.663185	1.78431e-07	219.138	-0.833168	Pogo transposable element with ZNF domain	0.6945		GO:0046872
CGI_10000843	-0.592062	0.00786221	34.632	-1.0511	3.11632e-09	44.4377	-0.865044	1.08733e-05	40.1198	-0.836068	Multiple epidermal growth factor-like domains 6	0.681		GO:0016021
CGI_10007551	-0.35955	0.030527	291.481	-1.19404	3.8747e-14	443.665	-0.955197	9.7031e-19	384.242	-0.836263	Brain-specific angiogenesis inhibitor 1	0.652		GO:0050794
CGI_10002358	-1.03107	0.00013576	22.9021	-0.794342	0.0071239	21.2064	-0.706345	0.00874288	19.7603	-0.84392	hypothetical protein CGI_10002358	0.693		GO:0016020
CGI_10001773	-0.748718	0.0272038	11.0173	-0.723784	0.0411616	11.3759	-1.06396	0.000648426	13.3393	-0.845488	brain-specific angiogenesis inhibitor 1-like	0.62		GO:0003676;GO:0046872;GO:0007165;GO:0004872;GO:0004871
CGI_10019673	-0.871018	9.3522e-11	267.072	-1.30584	7.94109e-17	345.637	-0.366452	0.00731447	219.443	-0.847769	Lupus brain antigen 1	0.719		GO:0005524
CGI_10018528	-0.859877	1.29477e-06	70.474	-0.63423	0.000349351	66.0706	-1.05828	1.09899e-11	78.8993	-0.850795	metabotropic glutamate receptor 3-like [Acropora digitifera]	0.5005		GO:0004930;GO:0007186;GO:0016021
CGI_10018714	-1.14975	4.67223e-07	35.2396	-0.522008	0.0441827	27.0759	-0.881026	3.90128e-05	31.3142	-0.850929	low-density lipo receptor-related 4-like	0.774		GO:0016021
CGI_10000740	-0.792233	0.000999334	27.7656	-0.937873	0.000290512	31.1879	-0.828404	0.000862336	29.1047	-0.852837	hypothetical protein CGI_10000740	0.6045		unknown
CGI_10014292	-0.573378	0.0329494	335.864	-1.37083	1.41083e-12	511.779	-0.615922	0.00249369	346.829	-0.853377	tyrosine- phosphatase 10D-like	0.643		GO:0004725;GO:0016021;GO:0035335
CGI_10017688	-0.42537	0.0196309	75.2571	-1.23029	5.47053e-17	113.494	-0.912188	4.7841e-09	95.5113	-0.855949	cell wall DAN4-like	0.7663		GO:0005509;GO:0016021;GO:0007156
CGI_10018538	-0.560953	0.00653026	168.573	-1.16368	5.01897e-11	232.537	-0.849988	1.81977e-05	196.857	-0.858207	hypothetical protein CGI_10018538	0.785		GO:0016021
CGI_10013776	-1.00207	6.74419e-14	376.115	-0.615267	1.02479e-05	328.267	-0.98218	1.18316e-19	379.342	-0.866507	0	0		unknown
CGI_10005490	-1.04339	0.00107373	16.0253	-0.849867	0.0291033	15.439	-0.711794	0.0428809	13.7509	-0.86835	HRAS-like suppressor 3	0.6015		GO:0016021
CGI_10027325	-1.0577	4.12722e-14	218.307	-0.438052	0.00792124	172.098	-1.12814	6.52094e-08	235.419	-0.874633	Sushi domain-containing 2	0.6426		GO:0005525;GO:0016021
CGI_10020739	-0.986399	1.22154e-19	394.514	-1.18749	1.43557e-25	452.612	-0.450991	0.024932	320.565	-0.874961	alkylglycerol monooxygenase	0.7225		GO:0005506;GO:0016021;GO:0005783;GO:0055114;GO:0050479;GO:0006633;GO:0006643
CGI_10014901	-0.392133	0.0272701	249.169	-0.457779	0.0134935	266.297	-1.77919	1.56101e-35	499.841	-0.876367	Endothelial cells scavenger receptor	0.63		GO:0003677;GO:0006310;GO:0015074
CGI_10023466	-1.22728	8.39723e-14	202.134	-0.454126	0.0128539	146.682	-0.970745	2.92125e-12	181.026	-0.884051	multiple epidermal growth factor-like domains 6 isoform X1 [Coturnix japonica]	0.662		GO:0007154;GO:0016021
CGI_10002543	-0.936577	0.000997871	18.9125	-0.688364	0.0313824	17.4148	-1.0295	9.59886e-05	20.1253	-0.884812	inositol 1,4,5-trisphosphate receptor type 1- partial	0.792		GO:0048016;GO:0016021;GO:0005220;GO:0070588;GO:0005783
CGI_10009272	-1.01614	1.24151e-08	283.35	-0.930067	3.8638e-06	283.903	-0.735076	1.818e-06	252.662	-0.89376	Multimerin-2 [Crassostrea gigas]	0.7035		unknown
CGI_10001888	-0.875468	2.65843e-06	135.489	-1.19722	2.62927e-11	164.951	-0.618024	0.00270858	123.28	-0.896905	PREDICTED: uncharacterized protein LOC105329167	0.726		GO:0003824;GO:0008152
CGI_10004648	-1.25465	1.35562e-06	19.9481	-0.713747	0.0145538	15.7595	-0.722718	0.0184163	15.6855	-0.897037	calcitonin gene-related peptide type 1 receptor-like	0.6438		unknown
CGI_10021200	-0.579389	0.0425867	27.9868	-1.38336	5.07369e-10	43.1775	-0.729187	0.00213461	30.2754	-0.897311	Multiple epidermal growth factor-like domains 10	0.665		GO:0016021
CGI_10019516	-0.633174	0.0259976	18.7403	-1.01683	5.05112e-05	23.4808	-1.05295	0.000187087	23.8709	-0.900985	Homeodomain partial [Aureobasidium namibiae CBS ]	0.5955		unknown
CGI_10011865	-1.23836	3.16023e-08	386.833	-0.967482	7.46161e-10	343.807	-0.518131	0.0305004	278.038	-0.907991	reticulocyte-binding 2 homolog a-like	0.649		GO:0007165
CGI_10013777	-1.05562	4.48983e-13	168.722	-0.650534	2.39719e-07	145.299	-1.01925	2.9313e-20	168.49	-0.908468	0	0		unknown
CGI_10012456	-0.878963	3.1476e-10	81.5166	-1.07243	4.18573e-16	92.7563	-0.783464	1.03185e-06	80.2034	-0.911619	hypothetical protein CGI_10012456	0.9825		GO:0016021
CGI_10022494	-1.09662	2.4966e-19	175.634	-1.09841	6.31257e-16	183.474	-0.566356	0.00122845	141.709	-0.920461	biogenesis of lysosome-related organelles complex 1 subunit 3-like isoform X1	0.809		unknown
CGI_10002912	-1.60493	1.62603e-49	784.201	-0.350765	0.0328606	454.416	-0.817169	0.00157077	558.316	-0.924288	zinc metallo ase nas-15-like	0.6265		unknown
CGI_10020084	-1.14103	2.33144e-05	17.2746	-0.622391	0.0483097	13.8891	-1.01704	0.000267407	16.6462	-0.926823	hypothetical protein CGI_10020084	0.8175		unknown
CGI_10026763	-0.809844	0.000922107	65.6592	-0.924541	9.41803e-06	71.7696	-1.09316	4.11572e-09	76.248	-0.942514	stimulated by retinoic acid gene 6 homolog	0.6435		GO:0016021
CGI_10021202	-1.3668	4.31527e-14	56.3417	-0.649164	0.00769636	41.453	-0.812154	8.00843e-05	43.7847	-0.942706	hypothetical protein CGI_10021202	0.7235		GO:0016021
CGI_10018925	-1.10096	1.00587e-05	40.8968	-1.26641	2.17559e-10	45.5808	-0.473402	0.0366791	30.6545	-0.946922	hypothetical protein CGI_10018925	1		unknown
CGI_10005730	-0.925316	6.85922e-09	257.78	-1.04272	3.29269e-11	283.602	-0.873618	3.92445e-08	257.105	-0.947217	ferric-chelate reductase 1	0.562		GO:0016021;GO:0055114
CGI_10025449	-0.877122	0.000264229	54.5632	-1.16627	2.08417e-06	65.9939	-0.801465	0.000570882	53.5997	-0.948286	conditioned medium factor receptor 1-like	0.6255		GO:0071949;GO:0016491;GO:0016020;GO:0055114
CGI_10002961	-0.815546	1.71567e-07	70.447	-1.59739	2.32971e-29	108.261	-0.451638	0.00606282	61.3624	-0.954857	hypothetical protein CGI_10002961	0.98		unknown
CGI_10018809	-1.46133	5.99421e-14	187.196	-0.482741	0.0363447	120.899	-0.93052	4.47558e-08	144.545	-0.958199	[Trichoplax adhaerens]	0.6683		unknown
CGI_10001606	-0.89416	0.00626828	18.4935	-0.917289	0.0038676	19.4077	-1.06999	0.000183803	20.4386	-0.96048	NADH dehydrogenase [ubiquinone] iron-sulfur mitochondrial	0.7038		unknown
CGI_10027688	-0.837165	9.00561e-08	3450.35	-1.08111	1.42458e-14	4018.65	-0.971474	1.92462e-12	3745.93	-0.963251	beta-1,3-glucan-binding -like	0.6905		GO:0005975;GO:0004553;GO:0002221
CGI_10026707	-0.396549	0.00207024	299.014	-1.32098	6.25979e-32	473.566	-1.17492	4.18202e-36	431.584	-0.96415	allene oxide synthase-lipoxygenase -like	0.705		GO:0016702;GO:0046872;GO:0055114
CGI_10002010	-0.439019	0.0029023	102.184	-0.730658	3.54626e-08	120.401	-1.72825	1.30179e-49	194.154	-0.965974	meiosis-specific nuclear structural 1-like	0.8345		GO:0031514
CGI_10000897	-1.36686	5.66616e-40	322.38	-0.739602	8.71321e-10	248.882	-0.815875	1.14213e-13	253.055	-0.974112	acid trehalase 1	0.619		GO:0005975;GO:0003824
CGI_10024135	-1.16202	0.00128594	10.0128	-0.831189	0.0321248	8.57853	-0.957981	0.0181535	9.4466	-0.983729	Polycystic kidney disease 1-like 2	0.656		GO:0016021
CGI_10014289	-1.20034	4.07306e-15	81.9593	-0.92583	1.11414e-08	74.5422	-0.827254	9.43268e-07	70.1436	-0.984476	serine-rich adhesin for platelets-like [Octopus bimaculoides]	0.8688		GO:0004930;GO:0007186;GO:0016021
CGI_10018362	-1.0577	1.60662e-15	701.302	-0.750225	3.14472e-08	632.284	-1.15301	2.50435e-19	750.662	-0.98698	fibrocystin-L-like isoform X1	0.5875		GO:0097159;GO:1901363;GO:0016021;GO:0016301;GO:0044237
CGI_10007573	-0.599995	0.00305145	404.667	-0.656923	0.00253806	432.772	-1.71571	1.06061e-24	722.256	-0.990875	multiple epidermal growth factor-like domains 10	0.7485		GO:0004725;GO:0035335
CGI_10024023	-1.10686	4.83012e-15	126.352	-1.33685	2.73846e-20	147.829	-0.536009	0.000209575	99.4655	-0.993241	serine threonine- phosphatase 6 regulatory ankyrin repeat subunit B-like	0.6995		unknown
CGI_10006877	-1.36839	7.64495e-08	68.9409	-0.847629	0.0102753	55.6391	-0.766634	0.00691113	51.654	-0.994218	hypothetical protein CGI_10006877	1		unknown
CGI_10007052	-1.11254	1.19045e-05	44.619	-0.986172	0.000233897	43.5959	-0.891766	0.000642312	40.7799	-0.996826	Ubiquitin-like modifier-activating enzyme 1	0.932		GO:0005524;GO:0016021;GO:0006464;GO:0008641
CGI_10014306	-0.951146	0.0193406	11.2836	-1.21238	0.00013682	12.8417	-0.828583	0.0194266	10.3081	-0.99737	cholecystokinin receptor-like [Crassostrea gigas]	0.589		GO:0004930;GO:0007186;GO:0005509;GO:0016021
CGI_10020955	-1.13679	4.56035e-06	46.4863	-0.551714	0.018902	35.9181	-1.30613	5.25326e-08	51.78	-0.99821	peripheral myelin 22-like [Crassostrea gigas]	0.6835		GO:0016021;GO:0005488;GO:0044237
CGI_10004890	-0.583453	0.00249847	63.2623	-1.32678	5.50539e-12	94.8071	-1.12223	2.07118e-10	83.4185	-1.01082	cartilage matrix -like	0.6745		GO:0005509
CGI_10028709	-0.865384	3.01194e-05	33.0741	-1.14401	1.38427e-09	39.4196	-1.03965	3.48057e-06	37.0529	-1.01635	caveolin-1-like [Crassostrea gigas]	0.811		GO:0005901;GO:0070836;GO:0000139
CGI_10027475	-0.939498	2.88512e-08	105.565	-1.27717	3.56756e-21	128.913	-0.836301	2.90783e-08	102.425	-1.01766	hypothetical protein CGI_10027475	0.82		unknown
CGI_10027510	-0.949018	5.24991e-06	96.7114	-1.06058	3.06079e-06	107.186	-1.04496	2.96424e-06	104.382	-1.01819	hypothetical protein CGI_10027510	0.752		unknown
CGI_10012592	-0.759137	0.0233699	92.9962	-1.02891	0.000194049	109.424	-1.26668	0.00398614	154.968	-1.01824	hypothetical protein CGI_10012592	0.8314		GO:0016021
CGI_10012841	-1.21838	2.5336e-06	79.1396	-1.01196	2.17455e-06	72.4995	-0.825212	0.000274299	65.2832	-1.01852	neurogenic locus notch homolog 1-like	0.6025		GO:0005509;GO:0005576
CGI_10023152	-1.10264	0.00749519	7.7342	-0.983205	0.0165413	7.29893	-1.01287	0.00997628	7.26872	-1.03291	BTB POZ domain-containing KCTD21	0.682		unknown
CGI_10024482	-0.856112	1.48544e-09	78.815	-1.20452	4.70686e-19	96.8278	-1.07104	6.83549e-17	88.9421	-1.04389	hypothetical protein CGI_10024482	0.9367		unknown
CGI_10018056	-0.632666	0.0349228	19.4087	-1.64276	4.07367e-12	34.2046	-0.864369	0.00226894	22.2805	-1.0466	cell death abnormality 1-like	0.8165		GO:0016310;GO:0016311;GO:0016301
CGI_10004891	-0.836415	1.66534e-06	140.842	-1.05276	1.91522e-13	161.613	-1.2516	2.13402e-14	176.343	-1.04692	V-set and immunoglobulin domain-containing 10-like isoform X4	0.6195		GO:0016021
CGI_10004754	-0.955456	0.00391168	14.2387	-1.49427	1.04744e-07	19.9512	-0.69387	0.03714	12.6576	-1.04786	von Willebrand factor type EGF and pentraxin domain-containing 1-like	0.8375		GO:0005509
CGI_10004719	-1.35906	2.5012e-09	32.6316	-1.11185	1.18844e-06	29.6433	-0.682911	0.0137057	23.7521	-1.05127	pseudouridylate synthase 7 homolog	0.686		GO:0001522;GO:0003723;GO:0009982
CGI_10027289	-1.55957	2.44083e-16	81.8674	-0.816912	0.00149857	58.7082	-0.780476	0.000277782	56.3312	-1.05232	transcription factor PML	0.6065		GO:0003676
CGI_10008130	-1.31107	1.20444e-16	724.916	-1.07022	1.34385e-16	663.997	-0.775766	4.82672e-16	566.851	-1.05235	multiple epidermal growth factor-like domains 10	0.7375		GO:0016021;GO:0016310;GO:0016301
CGI_10006551	-0.734157	1.54204e-10	279.844	-1.99584	6.45264e-40	562.754	-0.436444	0.000464055	252.204	-1.05548	alkylated DNA repair alkB homolog 8	0.631		GO:0000166;GO:0003676;GO:0016491;GO:0055114;GO:0002098;GO:0016300;GO:0030246;GO:0030488;GO:0044424
CGI_10019078	-1.00691	0.0360649	3.9599	-1.2428	0.00417207	4.54446	-0.922491	0.0480417	3.61418	-1.0574	GDP-fucose transporter 1	0.647		GO:0016021
CGI_10004992	-1.38491	1.32028e-07	99.0584	-1.19308	6.36714e-07	91.4937	-0.629657	0.0161384	67.9403	-1.06921	carbonic anhydrase 4-like	0.59		GO:0016020
CGI_10017318	-1.00244	1.18081e-15	725.629	-0.991722	1.72745e-17	750.073	-1.22531	2.6011e-19	829.04	-1.07316	ankyrin repeat and KH domain-containing 1-like	0.696		GO:0005524
CGI_10002786	-1.20778	4.14692e-14	61.8938	-0.949693	6.1461e-08	56.8776	-1.06631	7.27478e-12	58.9528	-1.0746	gelsolin 2	0.774		GO:0003779
CGI_10014301	-1.11733	0.0237978	2.36364	-1.01464	0.0426345	2.10927	-1.10526	0.0232606	2.417	-1.07908	glycine-rich cell wall structural -like	1		unknown
CGI_10023665	-1.09728	3.51479e-07	41.4366	-0.806414	0.000205654	37.2555	-1.34745	3.32146e-15	47.6232	-1.08371	hypothetical protein CGI_10023665	0.9925		unknown
CGI_10011689	-0.950687	0.000150847	41.7028	-0.889548	0.0033439	42.8396	-1.4439	9.14677e-10	55.3841	-1.09471	perlucin	0.7345		GO:0046872
CGI_10012548	-1.65995	1.01343e-20	81.7859	-0.824089	1.65409e-05	55.2978	-0.83331	1.82555e-06	54.6461	-1.10578	multiple epidermal growth factor-like domains 6	0.652		unknown
CGI_10023408	-1.02958	0.00184833	50.3267	-0.986521	7.62472e-06	48.7673	-1.30174	1.37989e-08	56.7395	-1.10595	hypothetical protein CGI_10023408	0.6155		unknown
CGI_10020703	-0.986673	1.50109e-06	36.5911	-0.698878	0.000564718	33.021	-1.6551	6.19576e-22	52.6714	-1.11355	Transposon TX1 uncharacterized 149 kDa	0.6365		GO:0008152;GO:0004386
CGI_10002425	-1.01334	4.46151e-05	32.1154	-1.34469	1.55539e-11	39.1942	-0.998593	4.80966e-05	32.5582	-1.11887	hypothetical protein CGI_10002425	1		unknown
CGI_10011172	-1.04672	1.01344e-05	41.5833	-1.48822	4.05325e-15	53.8085	-0.824817	0.000103843	37.7834	-1.11992	hypothetical protein CGI_10011172	0.812		unknown
CGI_10008366	-1.00539	4.15208e-08	149.084	-1.21042	3.74109e-16	170.389	-1.1478	3.0085e-15	162.267	-1.1212	ankyrin-1-like isoform X3	0.71		unknown
CGI_10012882	-1.34659	6.24622e-10	35.5414	-1.13735	0.000246684	34.4825	-0.882606	0.000382718	28.726	-1.12218	Transmembrane 2	0.6313		GO:0016021
CGI_10019385	-1.06074	0.0275008	3.17235	-1.0039	0.0411756	3.24313	-1.32116	0.00292188	3.85016	-1.1286	C-type mannose receptor 2-like isoform X1	0.61		unknown
CGI_10026563	-1.21069	0.000406351	12.3579	-0.923504	0.0156911	11.0874	-1.25212	0.000249964	13.0657	-1.12877	hypothetical protein CGI_10026563	1		unknown
CGI_10017434	-0.868978	0.0183204	9.46226	-1.62557	9.73228e-08	15.0776	-0.907964	0.0103479	9.90947	-1.13417	PREDICTED: uncharacterized protein LOC105341936 [Crassostrea gigas]	0.768		unknown
CGI_10011618	-1.2354	4.86457e-08	38.5544	-1.2703	1.82018e-11	40.1534	-0.906986	2.52687e-05	33.1633	-1.13756	hypothetical protein CGI_10011618	0.99		unknown
CGI_10011477	-0.95964	2.33153e-09	58.6501	-1.10893	4.90923e-09	66.2109	-1.36675	1.68885e-20	73.1677	-1.14511	biogenesis of lysosome-related organelles complex 1 subunit 3-like	0.9777		unknown
CGI_10004159	-0.897042	0.0157432	10.3615	-0.954707	0.00678811	10.982	-1.61834	3.33543e-05	18.3105	-1.1567	asunder homolog isoform X2	0.7495		GO:0005634;GO:0030317;GO:0005737;GO:0080154;GO:0007346
CGI_10001477	-1.24216	0.000901429	8.5165	-1.27577	0.000476059	9.04328	-0.954125	0.0118172	7.27309	-1.15735	neurogenic locus notch homolog 1-like	0.8625		unknown
CGI_10005241	-0.928822	2.86223e-05	365.221	-1.60397	6.33644e-23	530.582	-0.961298	2.56121e-08	374.81	-1.1647	[Nematostella vectensis]	0.682		GO:0016021
CGI_10007412	-1.15525	0.00278141	3488.67	-1.43597	4.6361e-05	4231.51	-0.90646	0.0218533	3060.63	-1.16589	calcium-dependent kinase 22-like [Crassostrea gigas]	0.6635		GO:0005509
CGI_10025455	-1.52399	0.00102566	3.33585	-0.994248	0.0487955	2.36341	-0.99394	0.0443371	2.13945	-1.17073	hypothetical protein CGI_10025455	1		unknown
CGI_10003583	-1.15716	3.54699e-09	52.6831	-1.10188	1.87239e-09	53.0926	-1.26565	1.73349e-11	56.909	-1.1749	proline-rich transmembrane 1-like	0.659		unknown
CGI_10017697	-1.30462	1.47891e-08	133.463	-1.25876	4.91325e-12	132.874	-0.985067	1.78666e-07	113.817	-1.18282	arylacetamide deacetylase-like 4	0.5295		GO:0008152;GO:0016787
CGI_10025817	-1.7031	5.73915e-12	87.0998	-1.19424	1.53794e-05	68.4781	-0.680092	0.0244877	51.6291	-1.19248	carbonic anhydrase 1-like	0.5655		unknown
CGI_10023697	-1.07313	4.4188e-07	91.9264	-1.26545	3.54458e-12	104.594	-1.24786	4.14857e-10	102.486	-1.19548	Transposon Tf2-6 poly	0.604		GO:0046872
CGI_10003043	-1.05289	5.59637e-11	1307.09	-1.22364	1.5335e-15	1477.86	-1.31449	5.92549e-16	1526.19	-1.197	stanniocalcin [Haliotis diversicolor supertexta]	0.5185		GO:0005576;GO:0005179
CGI_10018460	-1.35721	3.63548e-08	25.7179	-1.42457	3.5731e-09	27.6519	-0.809558	0.00208994	19.7555	-1.19711	MAM and LDL-receptor class A domain-containing 1-like	0.641		GO:0008270;GO:0005509;GO:0016020;GO:0006508;GO:0004222
CGI_10027825	-1.1608	6.59108e-10	1647.8	-1.39009	2.01723e-26	1897.35	-1.04297	9.12545e-13	1572.19	-1.19795	Phytanoyl- dioxygenase domain-containing 1 [Crassostrea gigas]	0.74		GO:0016020
CGI_10010591	-1.26516	1.46676e-05	21.2574	-1.5416	1.49562e-10	25.0278	-0.795051	0.0179539	16.9398	-1.2006	short-chain collagen C4-like	0.8405		GO:0005581
CGI_10026029	-1.00218	9.4077e-18	204.237	-1.63274	7.94504e-61	291.157	-1.01066	5.33306e-26	209.148	-1.21519	[Nematostella vectensis]	0.6905		GO:0005509;GO:0016021;GO:0016310;GO:0016301;GO:0005578
CGI_10008396	-1.17165	6.89204e-05	21.9155	-1.24822	7.87415e-06	23.5863	-1.23139	1.33118e-05	23.074	-1.21708	hypothetical protein CGI_10008396	0.8617		unknown
CGI_10022021	-1.87203	1.03109e-42	118.223	-1.06559	7.81938e-13	80.5011	-0.723333	0.000686767	67.8976	-1.22032	Mediator of RNA polymerase II transcription subunit 15	0.78		GO:0005515;GO:0016020;GO:0016592;GO:0001104;GO:0006367;GO:0006357
CGI_10028731	-1.22789	4.12546e-05	16.9982	-1.61622	8.77035e-09	22.1401	-0.841404	0.0115287	14.1652	-1.22851	hypothetical protein CGI_10028731	0.5505		GO:0016021;GO:0030246
CGI_10002906	-1.04683	3.88729e-06	54.1182	-1.43056	3.94974e-12	68.5791	-1.20871	2.00161e-08	60.0699	-1.2287	Complement C1q 2	0.8195		unknown
CGI_10014834	-0.98105	0.0298537	5.10819	-1.54146	7.61883e-05	7.47137	-1.18575	0.00406332	5.84831	-1.23609	dentin sialophospho -like [Crassostrea gigas]	0.7335		unknown
CGI_10013771	-1.70205	4.24874e-09	19.2471	-0.774422	0.0215383	11.827	-1.23219	4.19798e-05	14.8245	-1.23622	hypothetical protein CGI_10013771	0.7269		unknown
CGI_10004668	-1.58121	0.000623923	2.93957	-1.03544	0.0387268	1.98776	-1.13241	0.0199036	2.27485	-1.24969	Limulus clotting factor C	0.539		unknown
CGI_10004617	-1.98016	2.441e-18	38.899	-0.697346	0.0189628	20.2646	-1.07418	8.54803e-05	24.1716	-1.25056	stress response NST1-like	0.6471		unknown
CGI_10002784	-0.921946	0.00661346	23.0168	-2.20304	1.84483e-22	47.9012	-0.668181	0.0378768	20.3495	-1.26439	histone-lysine N- H3 lysine-79 specific-like	0.6929		unknown
CGI_10002744	-1.52315	1.14233e-06	13.731	-0.723153	0.0481657	9.06615	-1.60622	2.50856e-07	14.8134	-1.28417	Multiple epidermal growth factor-like domains 10	0.713		unknown
CGI_10008344	-1.09871	0.0153474	1.26338	-1.28793	0.00505894	1.58073	-1.46816	0.00135024	1.66252	-1.28493	nuclease HARBI1	0.734		unknown
CGI_10000462	-1.69832	6.93892e-20	333.705	-1.11653	1.46815e-09	253.822	-1.04629	2.80087e-10	239.718	-1.28705	polyadenylate-binding 4-like	0.8375		GO:0000166;GO:0003723;GO:0005737
CGI_10003527	-0.87762	9.16506e-06	55.7701	-1.25506	1.2116e-10	70.1297	-1.78723	2.59102e-21	92.3388	-1.30664	GPI-anchored isoform X2	0.7242		GO:0016021
CGI_10007312	-1.58651	1.78403e-06	26.1659	-1.04917	0.00333298	19.6866	-1.31463	5.89599e-05	22.3639	-1.31677	L-asparaginase-like isoform X1	0.9		GO:0006520;GO:0004067
CGI_10000196	-1.13113	0.0220915	2.05691	-1.56419	0.000782716	3.2279	-1.25791	0.00853406	2.33937	-1.31774	Alstrom syndrome 1	0.852		unknown
CGI_10001160	-1.289	4.58578e-10	67.1637	-1.93164	1.21942e-38	97.3353	-0.735556	0.000366253	52.0482	-1.31873	prion-like-(Q N-rich) domain-bearing 25	0.5688		unknown
CGI_10002555	-1.5243	0.00121808	2.47236	-1.02674	0.0323566	2.86879	-1.49766	0.00137957	2.86961	-1.34957	hypothetical protein CGI_10002555	0.91		GO:0016021
CGI_10002146	-2.04851	5.14936e-09	12.4198	-1.06194	0.0124128	6.88097	-0.942859	0.0257487	6.22884	-1.3511	ADAM family mig-17	0.662		GO:0006508;GO:0004222
CGI_10024205	-1.53671	4.33705e-05	8.5411	-1.17562	0.00595728	7.39302	-1.37384	0.000437752	7.92858	-1.36206	tyrosine- kinase Fps85D-like isoform X4	0.682		GO:0005524;GO:0018108;GO:0004715
CGI_10001186	-1.75734	3.36561e-09	20.4786	-1.25252	6.89867e-05	15.6751	-1.08055	0.00251636	14.4364	-1.36347	Iduronate 2- partial	0.832		GO:0008484;GO:0008152
CGI_10025833	-1.12384	0.0130335	1.4803	-1.37003	0.0029905	1.55487	-1.69771	0.000207752	2.0265	-1.39719	Leucine-rich repeat-containing 49	0.9933		unknown
CGI_10004618	-1.7436	2.52127e-19	40.3545	-1.28847	2.38931e-10	32.7554	-1.1713	1.66123e-07	30.5564	-1.40112	hypothetical protein CGI_10004618	0.5557		unknown
CGI_10024509	-0.799998	0.000155866	100.982	-1.47704	5.55527e-38	144.124	-1.94225	8.77477e-74	181.861	-1.40643	hypothetical protein CGI_10024509	0.81		unknown
CGI_10019957	-1.84414	2.19005e-30	118.618	-0.712326	4.21952e-06	68.8192	-1.6642	1.60507e-35	108.436	-1.40689	zinc finger 235-like isoform X1 [Lingula anatina]	0.697		GO:0003676
CGI_10010595	-1.24517	0.00880542	3.10945	-1.12003	0.0208007	2.93709	-1.86295	1.68674e-05	5.43826	-1.40939	neurogenic locus notch homolog 1-like	0.853		unknown
CGI_10015600	-1.8976	3.54293e-29	459.751	-1.29457	8.79124e-18	341.156	-1.04229	2.04188e-11	295.968	-1.41149	Synaptosomal-associated 25	0.888		GO:0098793;GO:0016082;GO:0019905;GO:0006508;GO:0031629;GO:0005484;GO:0031201;GO:0004222;GO:0005886
CGI_10004578	-1.23876	1.08232e-23	250.886	-1.99579	3.63619e-42	396.101	-1.00422	2.96982e-07	232.043	-1.41293	MAM and LDL-receptor class A domain-containing 1-like	0.7205		GO:0008270;GO:0004725;GO:0016020;GO:0006508;GO:0004222;GO:0035335
CGI_10003485	-1.68293	9.52934e-20	44.2361	-0.91396	5.39378e-05	30.9508	-1.65258	1.42418e-13	45.4435	-1.41649	SLIT-ROBO Rho GTPase-activating 1-like	0.8025		GO:0008270;GO:0005622
CGI_10027798	-2.29078	5.43548e-34	131.449	-0.697364	0.0126736	58.3935	-1.27613	6.69124e-11	75.2213	-1.42143	hypothetical protein CGI_10027798	0.7167		unknown
CGI_10001362	-1.31617	1.78007e-10	42.1833	-0.69997	0.0020596	32.2722	-2.26732	9.57849e-26	75.9694	-1.42782	hypothetical protein CGI_10001362	0.6225		GO:0046872
CGI_10011617	-1.60518	0.000175121	6.61628	-1.73183	1.17562e-05	6.89946	-1.01836	0.0288553	4.4125	-1.45179	PREDICTED: uncharacterized protein LOC105346815 [Crassostrea gigas]	0.6975		unknown
CGI_10022286	-2.20565	2.69357e-08	7.37872	-1.12516	0.01852	3.62116	-1.03042	0.0327011	3.37834	-1.45374	hypothetical protein CGI_10022286	0.82		GO:0016747;GO:0008152
CGI_10000275	-1.03735	0.0377435	2.55547	-1.54187	0.000630214	3.62306	-1.80874	5.85291e-05	5.78766	-1.46265	cell death abnormality 1-like	0.774		GO:0016310;GO:0016301
CGI_10008187	-1.50612	1.1822e-11	34.7076	-1.9715	1.31699e-19	47.4226	-0.929273	0.000103518	26.1894	-1.46896	Plasminogen	0.744		GO:0008270;GO:0004725;GO:0006508;GO:0016021;GO:0050878;GO:0004222;GO:0035335
CGI_10018905	-1.52878	2.2072e-13	37.6643	-1.41	5.18115e-13	36.4765	-1.50088	2.51462e-13	37.9014	-1.47989	hypothetical protein CGI_10018905	0.8825		unknown
CGI_10001378	-1.31574	0.00619556	6.16321	-2.14018	7.2299e-08	8.87557	-1.01194	0.040406	4.83176	-1.48929	short-chain collagen C4-like	0.702		unknown
CGI_10016613	-1.66263	5.32536e-06	10.5296	-1.60759	4.12879e-05	11.156	-1.2175	0.00809047	9.86233	-1.49591	hypothetical protein CGI_10016613	1		GO:0016021
CGI_10002820	-1.80344	7.73932e-07	8.81911	-1.52967	4.09088e-05	7.57041	-1.16881	0.00512693	6.10332	-1.50064	asteroid 1	0.685		unknown
CGI_10013901	-1.12562	6.25348e-09	63.6942	-1.78725	3.08515e-26	93.9096	-1.65602	2.89601e-31	84.856	-1.52296	ankyrin repeat [Trichomonas vaginalis G3]	0.526		unknown
CGI_10007233	-1.7391	7.42165e-26	68.0075	-1.5735	1.64384e-22	64.5011	-1.25985	1.72507e-09	54.3564	-1.52415	N-lysine methyltransferase SETD8-A-like	0.768		GO:0005509;GO:0005544
CGI_10014308	-1.74255	2.36556e-16	44.4496	-1.66762	3.6118e-11	45.7149	-1.17004	1.93905e-06	33.6022	-1.52674	serine threonine- kinase HT1-like [Nicotiana tabacum]	0.5515		GO:0005524;GO:0004672;GO:0006468
CGI_10000062	-1.72483	6.03378e-05	5.98547	-1.89292	1.62512e-06	6.21255	-0.963477	0.0455939	3.39325	-1.52707	hypothetical protein CGI_10000062	0.695		unknown
CGI_10000444	-1.30953	2.1247e-06	31.6939	-1.43918	6.51037e-12	34.4433	-1.84937	1.37468e-20	42.506	-1.5327	DNA polymerase III polC-type	0.6715		unknown
CGI_10005284	-1.03076	0.00523198	10.0919	-1.28484	0.000108722	11.9515	-2.38015	1.18542e-17	23.1087	-1.56525	hypothetical protein CGI_10005284	0.7545		unknown
CGI_10022066	-1.41732	9.3915e-18	67.078	-2.1515	9.31313e-33	107.011	-1.12876	1.23767e-06	60.3071	-1.56586	plasminogen-like [Crassostrea gigas]	0.781		GO:0008270;GO:0004725;GO:0016020;GO:0006508;GO:0004222;GO:0035335
CGI_10017489	-1.69469	1.80609e-14	30.313	-0.784977	0.0118142	19.7154	-2.24312	6.90352e-25	43.3046	-1.57426	[Nematostella vectensis]	0.6086		unknown
CGI_10011221	-0.622206	0.00519408	219.298	-2.06302	4.41055e-22	496.945	-2.03811	1.882e-26	473.483	-1.57444	probable caffeine synthase 2	0.625		GO:0055085;GO:0016491;GO:0016021;GO:0008168;GO:0055114;GO:0032259
CGI_10028086	-1.50646	3.80348e-16	167.03	-1.51393	1.91585e-18	173.707	-1.75104	2.52393e-11	207.387	-1.59048	neuroendocrine convertase 2-like isoform X4	0.9117		unknown
CGI_10019747	-2.2504	5.95631e-24	180.09	-1.53028	4.64039e-10	122.927	-0.992437	4.67856e-05	89.7453	-1.59104	Calcium homeostasis endoplasmic reticulum	0.5215		unknown
CGI_10004614	-1.99501	2.45563e-14	25.9493	-2.15175	1.49778e-16	29.8999	-0.714049	0.0252913	12.886	-1.62027	polypeptide N-acetylgalactosaminyltransferase 5-like	0.7805		GO:0008152;GO:0016021;GO:0005794;GO:0016740
CGI_10027115	-2.01582	1.55098e-11	16.2625	-1.3119	0.00095285	11.9531	-1.60501	1.7649e-06	13.2244	-1.64424	transcription factor PML	0.638		GO:0003676
CGI_10022909	-1.36663	0.000121253	87.3577	-2.51186	1.40456e-23	170.357	-1.06565	7.04864e-05	69.6887	-1.64805	l-rhamnonate dehydratase	0.812		GO:0009063;GO:0003824
CGI_10000812	-2.0575	7.89391e-24	56.0322	-1.35914	1.0805e-09	39.2722	-1.57274	3.40829e-12	43.7566	-1.66312	iduronate 2-sulfatase-like	0.6685		GO:0008484;GO:0008152
CGI_10018607	-1.05241	0.0266148	6.82667	-1.91717	1.24981e-07	11.0864	-2.03513	3.49323e-08	12.337	-1.66823	glyco endo-alpha-1,2-mannosidase-like	0.7705		GO:0004559;GO:0016020;GO:0005794
CGI_10016595	-1.14579	1.10864e-06	63.1295	-1.90449	5.18569e-14	103.464	-1.97832	3.57403e-17	104.766	-1.6762	hypothetical protein CGI_10016595	1		unknown
CGI_10025039	-2.00512	2.29585e-30	93.2733	-2.18801	6.33074e-18	116.189	-0.841467	0.000585168	51.693	-1.6782	von Willebrand factor D and EGF domain-containing	0.5735		unknown
CGI_10010610	-1.13983	0.00170271	8.29254	-1.42609	3.48161e-05	10.2564	-2.47759	2.71006e-17	19.7447	-1.68117	carbonyl reductase [NADPH] 1-like	0.816		GO:0016491;GO:0055114
CGI_10020901	-1.10492	4.05604e-05	16.8049	-1.41137	7.49281e-08	20.7754	-2.56516	9.41e-23	42.8745	-1.69382	PREDICTED: uncharacterized protein LOC105347142 [Crassostrea gigas]	0.715		unknown
CGI_10017432	-1.97829	5.93069e-12	19.5763	-2.1342	6.89636e-16	21.9245	-0.984526	0.00795736	11.4443	-1.699	short-chain collagen C4-like	0.811		unknown
CGI_10025917	-0.921456	0.0190664	18.3798	-1.66041	2.5686e-05	33.5921	-2.52047	5.06056e-18	49.7556	-1.70078	collagen alpha-2(IV) chain-like	0.5992		unknown
CGI_10011019	-1.56237	1.5695e-08	22.5352	-1.6612	5.92288e-11	24.5095	-1.89855	3.53519e-16	27.3957	-1.70737	multiple epidermal growth factor-like domains 11	0.5555		GO:0016021
CGI_10000219	-1.75521	2.53054e-05	5.60834	-1.07791	0.0241707	3.68521	-2.38554	3.11901e-10	9.07817	-1.73955	hypothetical protein CGI_10000219	0.975		unknown
CGI_10009147	-0.974727	0.000450949	114.718	-1.70763	3.94214e-17	172.74	-2.6025	5.52222e-47	287.725	-1.76162	hypothetical protein CGI_10009147	0.715		unknown
CGI_10012468	-1.74207	9.96594e-110	473.906	-1.58759	4.33631e-97	453.722	-1.99504	5.1247e-126	557.524	-1.7749	Aspartyl aminopeptidase	0.808		GO:0008270;GO:0006508;GO:0004177;GO:0008237
CGI_10026452	-2.02517	7.49305e-06	3.47714	-2.10741	2.34044e-06	3.88557	-1.21284	0.0108709	1.89958	-1.78181	BTB and MATH domain-containing 36	0.78		unknown
CGI_10011429	-1.01619	0.00673137	180.21	-1.51449	1.38449e-05	254.848	-2.86089	4.92463e-18	670.575	-1.79719	hypothetical protein CGI_10011429	0.7933		unknown
CGI_10010017	-2.23997	3.07364e-12	13.4231	-1.71711	1.7487e-05	11.3442	-1.49487	5.0569e-05	8.66425	-1.81732	Phosphorylase b kinase regulatory subunit beta	0.898		GO:0043515;GO:0055085;GO:0007018;GO:0005215;GO:0005874;GO:0008017;GO:0005524;GO:0003777;GO:0005516;GO:0005977;GO:0016021;GO:0016310;GO:0016301;GO:0007080;GO:0051315
CGI_10006611	-2.01457	4.18357e-42	318.204	-1.90346	9.81738e-97	304.059	-1.54926	7.98817e-19	253.282	-1.82243	nucleolar transcription factor 1-like	0.724		unknown
CGI_10008464	-2.11523	1.21914e-07	18.441	-2.44076	1.6533e-12	20.4369	-0.936375	0.0303338	7.36363	-1.83079	28S ribosomal mitochondrial	0.6757		unknown
CGI_10022958	-1.57077	4.34628e-08	24.3647	-1.78172	1.41083e-12	28.0067	-2.14066	1.07495e-17	34.6461	-1.83105	Transposon Tf2-6 poly	0.72		GO:0046872
CGI_10028585	-1.19056	3.381e-06	134.625	-1.55315	1.09291e-10	170.694	-2.76599	1.90925e-37	351.797	-1.83656	hypothetical protein CGI_10028585	1		unknown
CGI_10021499	-2.57276	1.77801e-35	68.6148	-1.5965	4.82621e-13	39.5559	-1.38568	1.04293e-07	35.2572	-1.85165	A-kinase anchor 9	0.7691		GO:0008270;GO:0016310;GO:0016301;GO:0005622
CGI_10019454	-1.9591	9.2538e-23	75.2667	-3.10571	4.74986e-65	159.533	-0.683034	0.00165606	38.9056	-1.91595	FAS-associated factor 2-like	0.788		GO:0016021
CGI_10013289	-2.09583	4.57011e-21	45.102	-1.39674	2.14872e-06	32.4026	-2.26257	1.6278e-23	51.5531	-1.91838	multiple epidermal growth factor-like domains partial	0.8715		GO:0016021;GO:0016310;GO:0016301
CGI_10018558	-2.35995	4.41379e-08	6.17879	-2.13983	8.61825e-07	4.9999	-1.26558	0.0082207	2.49222	-1.92179	hypothetical protein CGI_10018558	0.955		unknown
CGI_10004634	-2.1687	5.66755e-38	273.077	-1.81281	7.7671e-27	230.746	-1.79187	3.87008e-26	224.149	-1.92446	hypothetical protein CGI_10004634	0.6645		unknown
CGI_10015373	-2.18413	6.41359e-07	4.35779	-2.06388	3.7244e-06	4.58255	-1.58889	0.000630494	3.47992	-1.94564	death-inducer obliterator 1-like	0.6138		unknown
CGI_10011227	-1.96738	3.08022e-23	99.0612	-2.4044	2.95279e-36	133.927	-1.52113	2.63596e-14	78.4189	-1.9643	short-chain collagen C4-like	0.824		GO:0005507;GO:0016491;GO:0005581;GO:0016021;GO:0055114
CGI_10019777	-1.31967	0.00545185	1.65082	-2.68191	3.9488e-10	5.33349	-1.89208	3.28932e-05	3.10772	-1.96455	hypothetical protein CGI_10019777	0.5975		GO:0003677;GO:0003713;GO:0006355
CGI_10004001	-0.926055	0.00214895	68.1566	-2.68036	6.7772e-39	191.096	-2.34027	2.74167e-35	148.773	-1.98223	fibropellin-3-like [Crassostrea gigas]	0.8733		unknown
CGI_10011859	-1.13372	0.0205519	1.44733	-1.32021	0.00591131	2.05323	-3.5281	2.28359e-19	12.8576	-1.99401	Three prime repair exonuclease 1	0.7338		unknown
CGI_10003629	-0.855339	4.6944e-06	112.794	-3.04718	1.2687e-105	401.901	-2.20684	2.7497e-55	235.154	-2.03645	multiple epidermal growth factor-like domains partial	0.7527		GO:0016021
CGI_10018331	-2.4028	8.93789e-38	125.385	-2.24021	8.38859e-40	116.465	-1.53816	2.07255e-16	76.8342	-2.06039	Multiple epidermal growth factor-like domains 10	0.7875		GO:0005581;GO:0016021
CGI_10016285	-2.06449	1.0519e-07	8.00392	-2.28685	5.89861e-10	9.49413	-1.94574	6.14527e-07	7.44724	-2.09902	0	0		unknown
CGI_10007549	-2.16878	2.1586e-07	8.76626	-1.96911	3.73207e-06	7.74	-2.21635	1.12791e-07	9.80652	-2.11808	methionine aminopeptidase 1-like	0.52		GO:0006508;GO:0004177
CGI_10015389	-2.49762	8.14851e-09	192.419	-1.63495	0.000336083	81.6093	-2.29422	1.78666e-07	188.929	-2.14226	hypothetical protein CGI_10015389	1		unknown
CGI_10013552	-2.55289	1.07207e-08	215.697	-2.05339	5.6153e-06	78.0169	-1.8369	5.83759e-05	70.3761	-2.14773	hypothetical protein CGI_10013552	0.99		unknown
CGI_10003323	-3.5099	1.01414e-33	55.6973	-1.12656	0.00128609	11.4212	-1.82422	5.14522e-10	16.7844	-2.15356	hypothetical protein CGI_10003323	0.945		GO:0003676;GO:0008270
CGI_10022514	-2.65218	4.9524e-10	5.82155	-1.60944	0.00057842	2.43944	-2.25805	2.50856e-07	4.34228	-2.17322	leucine-rich repeat extensin 5	0.716		unknown
CGI_10026141	-3.30158	9.67855e-18	15.5365	-1.02933	0.0391333	2.43741	-2.24071	4.57147e-08	6.06739	-2.19054	hypothetical protein CGI_10026141	0.6385		unknown
CGI_10024618	-1.26246	0.00178859	11.1861	-2.17199	2.43486e-13	18.745	-3.16051	1.19604e-32	35.389	-2.19832	B(0,+)-type amino acid transporter 1	0.7845		GO:0003824;GO:0008152;GO:0016021;GO:0015171;GO:0003333
CGI_10009391	-4.45216	3.96318e-48	60.425	-1.16783	0.0118028	6.35731	-1.00437	0.0302408	5.33213	-2.20812	serine threonine- kinase roco5	0.766		GO:0005525;GO:0007264;GO:0016021;GO:0016310;GO:0016301;GO:0005622
CGI_10024319	-1.94563	7.16594e-08	15.0565	-2.89887	5.29952e-21	28.9445	-1.96784	1.13421e-08	15.2103	-2.27078	Serine threonine- phosphatase 4 catalytic subunit	0.974		GO:0004721;GO:0006470
CGI_10018037	-3.36466	2.19137e-44	46.5259	-1.15618	0.00247068	12.8204	-2.40748	1.99438e-18	25.7538	-2.30944	collagen alpha-1(IV) chain-like	0.8475		GO:0000166;GO:0003723;GO:0005581;GO:0016021;GO:0006396;GO:0005201;GO:0005578
CGI_10012710	-1.04659	0.00304293	18.1356	-2.36299	2.87824e-23	38.6911	-3.53678	5.1178e-46	88.3555	-2.31545	Nucleolar 16	0.75		GO:0016020
CGI_10008308	-3.29469	7.00173e-16	8.708	-1.0625	0.0258071	1.37019	-2.59791	1.45227e-09	5.04241	-2.31837	hypothetical protein CGI_10008308	0.725		unknown
CGI_10009618	-2.85518	4.41632e-12	7.76592	-2.47499	6.13666e-09	5.91983	-1.70233	0.000200966	3.09313	-2.34417	Myeloid leukemia factor 1	0.6805		GO:0016021
CGI_10022496	-2.68013	1.25119e-23	24.6529	-2.40981	9.22146e-17	22.1108	-2.03454	1.09699e-11	16.9637	-2.37483	biogenesis of lysosome-related organelles complex 1 subunit 3-like	0.895		unknown
CGI_10025041	-1.44793	0.000517667	14.6022	-3.66641	8.82193e-30	72.114	-2.32864	2.42012e-12	24.7247	-2.48099	von Willebrand factor D and EGF domain-containing -like	0.6155		unknown
CGI_10002533	-2.16398	2.48475e-13	19.7784	-1.89278	1.32707e-06	21.1913	-3.45987	3.67849e-37	49.9887	-2.50554	hypothetical protein CGI_10002533	0.591		unknown
CGI_10002965	-3.57799	6.81044e-73	98.0589	-3.12711	2.23753e-50	76.242	-0.852481	0.012191	19.9872	-2.51919	hypothetical protein CGI_10002965	0.645		unknown
CGI_10027288	-1.38988	0.00375441	23.507	-3.15188	1.37149e-13	152.142	-3.07972	4.28283e-13	140.567	-2.54049	hypothetical protein CGI_10027288	0.699		unknown
CGI_10012598	-1.19936	5.18139e-05	195.323	-2.80069	5.05507e-29	543.559	-3.90734	6.31867e-82	1065.74	-2.6358	plasminogen-like [Crassostrea gigas]	0.687		GO:0004175;GO:0030246
CGI_10002454	-1.13012	0.000303025	24.2982	-5.21746	3.99835e-203	331.868	-2.04558	3.06113e-23	39.8832	-2.79772	Tubulin alpha-1 chain	0.946		GO:0005525;GO:0005524;GO:0042626;GO:0055085;GO:0005737;GO:0003924;GO:0008152;GO:0016021;GO:0005200;GO:0005874;GO:0007017
CGI_10025040	-1.30199	0.002254	5.87343	-4.53693	6.46701e-43	77.3875	-2.7796	1.05147e-12	22.6726	-2.87284	hypothetical protein CGI_10025040	1		GO:0016021
CGI_10009308	-2.79972	1.82551e-12	8.56517	-3.61216	3.11832e-22	17.9943	-2.23933	1.40637e-07	6.15334	-2.88374	DNA polymerase III polC-type	0.729		GO:0003676;GO:0008408;GO:0090305;GO:0005509
CGI_10003006	-2.6807	3.61711e-16	15.1436	-3.14216	1.27916e-23	21.9917	-2.82909	8.82456e-17	18.5934	-2.88398	lunapark isoform X2	0.675		GO:0016021
CGI_10025977	-3.93508	1.0855e-26	26.2623	-1.42982	0.00241168	3.78714	-3.33495	4.56302e-18	17.3641	-2.89995	P2X purinoceptor 7-like	0.658		GO:0004931;GO:0005887;GO:0035590;GO:0033198;GO:0001614;GO:0098655
CGI_10008466	-3.43257	2.21559e-22	20.645	-3.9506	1.86973e-31	32.2826	-1.59748	0.000138893	5.10008	-2.99355	28S ribosomal mitochondrial	0.586		unknown
CGI_10009617	-3.75881	5.55291e-33	99.9468	-3.57754	2.90784e-23	117.28	-1.99074	2.39232e-07	31.1598	-3.10903	Myeloid leukemia factor partial	0.6635		unknown
CGI_10011796	-2.48683	1.06383e-13	21.8784	-4.15988	2.85688e-65	64.0179	-2.96487	9.96214e-27	28.1223	-3.20386	cell death abnormality 1-like	0.6721		GO:0016021
CGI_10026931	-2.75942	1.26653e-13	17.1807	-3.35562	1.62401e-25	23.8474	-3.75182	1.78161e-30	34.447	-3.28895	hypothetical protein CGI_10026931	0.6813		unknown
CGI_10006683	-4.99404	6.26692e-60	68.7564	-1.22393	0.00574955	4.32691	-3.77185	1.76568e-25	36.5129	-3.32994	von Willebrand factor type EGF and pentraxin domain-containing 1-like	0.7473		GO:0005581
CGI_10024958	-4.27927	1.04923e-33	24.9904	-4.80341	1.07879e-45	39.1766	-1.29165	0.00678815	2.49831	-3.45811	serine threonine- kinase roco5	0.7005		GO:0005525;GO:0007264;GO:0016021;GO:0016310;GO:0016301;GO:0005622
CGI_10028374	-2.92234	3.01618e-14	22.3906	-3.41843	6.28216e-26	25.8815	-4.03646	1.19676e-32	49.0809	-3.45908	scavenger receptor class F member 2	0.65		GO:0016021
CGI_10005548	-3.11768	6.13132e-16	83.996	-4.07214	1.01294e-48	111.092	-4.7126	2.1019e-103	148.703	-3.96747	serine threonine- kinase Nek4-like	0.6945		GO:0005524;GO:0050794;GO:0016021;GO:0004672;GO:0006468
CGI_10008735	-4.93173	1.79335e-53	61.2196	-4.2628	1.44265e-38	36.3677	-3.30839	1.14981e-21	16.6689	-4.16764	hypothetical protein CGI_10008735	0.76		unknown
CGI_10016572	-6.64834	2.87338e-123	337.384	-6.68737	7.74563e-130	350.206	-3.49999	4.6616e-26	31.3747	-5.6119	hypothetical protein CGI_10016572	1		unknown
