# Supplementary material for: Differential basal expression of immune genes confers Crassostrea gigas resistance to Pacific oyster mortality syndrome
Source: BMC Genomics. 2020 Jan 20;21:63. doi: 10.1186/s12864-020-6471-x (PMC6971885; doi:10.1186/s12864-020-6471-x)
Supplement: Supplementary file 5 — Additional file 5. List of DEGs specifics to the RF48 oyster family. This table presents the Log2 fold change of each CGI differentially expressed (significant) only in the the RF48 oyster family compared to the three susceptible families (SF11, SF14 and SF15), the Blast results, the enriched functional categories and details of each comparison (Log2 fold change, p-value, GO categories and number of reads). [file 12864_2020_6471_MOESM5_ESM.xlsx]

## Sheet: Feuil1
N° CGI	Log2_Fold change_RF48 VS SF11	pval_RF48 VS SF11	Reads_RF48 VS SF11	Log2_Fold change_RF48 VS SF14	pval_RF48 VS SF14	Reads_RF48 VS SF14	Log2_Fold change_RF48 VS SF15	pval_RF48 VS SF15	Reads_RF48 VS SF15	Log2_Fold change_Mean	Blast	MeanSimilarity	Enrichment	GO
CGI_10023363	0.395503	0.000298611	1365.39	0.273251	0.021698	1473.2	0.392996	0.00032426	1394.74	0.353917	actin-related 2 3 complex subunit 4 [Lingula anatina]	0.923	actin polymerization or depolymerization	GO:0003779;GO:0005737;GO:0030041;GO:0034314;GO:0005885
CGI_10026160	-0.330314	0.0300006	118.922	-0.465242	0.000143296	130.151	-0.563185	5.15303e-06	133.272	-0.452914	cofilin [Puccinia graminis tritici CRL 75-36-700-3]	0.679	actin polymerization or depolymerization	GO:0003779;GO:0030042;GO:0015629
CGI_10028906	3.53955	3.94434e-51	128.972	3.33868	1.36766e-46	135.728	2.78973	2.85378e-40	139.021	3.22266	microfibril-associated glyco 4-like	0.9005	defense response ; response to stress	GO:0006952
CGI_10014739	0.652252	0.0254091	14.8415	2.37733	4.85761e-12	10.8582	2.83802	2.81181e-14	10.0924	1.95587	Laccase- partial	0.714	defense response ; response to stress	GO:0033573;GO:0005381;GO:0005507;GO:0055114;GO:0004322;GO:0033215;GO:0034755;GO:0006952;GO:0006954
CGI_10000986	1.07715	1.26554e-08	528.532	0.895198	2.74618e-06	574.32	3.71355	1.63653e-47	392.216	1.8953	Fibrinogen C domain-containing 1	0.8025	defense response ; response to stress	GO:0016020;GO:0006952
CGI_10006673	1.94639	2.96111e-11	22.4059	1.95946	9.1604e-12	23.339	1.43953	9.32674e-07	24.9621	1.78179	fibrinogen domain	0.688	defense response ; response to stress	GO:0006952
CGI_10000281	1.43383	0.00234974	2.57059	1.37765	0.00440715	2.72399	2.01065	2.34817e-05	2.27455	1.60738	cytochrome b-245 light chain-like	0.6135	defense response ; response to stress	GO:0036477;GO:0008284;GO:0006952;GO:0044446;GO:0008217;GO:0044710;GO:0020037;GO:0048584;GO:0051279;GO:0005768;GO:0005515;GO:0006801;GO:0043020;GO:0016491;GO:0005739;GO:0070257;GO:0031347;GO:0001819;GO:2000379;GO:0051128
CGI_10003187	1.79363	5.0787e-07	27.9862	1.1058	0.000899109	33.7778	1.82072	1.39983e-07	28.6536	1.57338	fibrinogen domain	0.706	defense response ; response to stress	GO:0006952
CGI_10026758	1.66369	0.00038269	16.4624	1.34422	0.00467329	18.8837	1.28088	0.0068388	18.9713	1.4296	toll-like receptor 13	0.66	defense response ; response to stress	GO:0007165;GO:0045087;GO:0016021
CGI_10024612	1.16656	0.000810237	11.0549	1.24674	0.000291031	11.3033	1.62666	9.58732e-06	10.1844	1.34665	hypothetical protein CGI_10024612	0.661	defense response ; response to stress	GO:0007165;GO:0006952;GO:0008063;GO:0050776
CGI_10018641	0.732112	0.00246455	40.8264	0.556811	0.0351693	44.571	2.41851	7.65973e-20	30.5178	1.23581	Toll-like receptor 1	0.725	defense response ; response to stress	GO:0007165;GO:0006952;GO:0008063;GO:0050776
CGI_10003576	0.963025	0.00626099	12.0743	1.39385	2.80657e-05	11.4528	1.12307	0.000401641	11.9652	1.15998	toll-like receptor 4 [Crassostrea gigas]	0.7195	defense response ; response to stress	GO:0007165;GO:0016021;GO:0006952;GO:0008063;GO:0050776
CGI_10002683	1.1266	0.0130369	1.45301	1.2262	0.00884042	1.51101	1.08161	0.02987	1.64715	1.1448	Laccase- partial	0.706	defense response ; response to stress	GO:0005975;GO:0005507;GO:0016491;GO:0006826;GO:0055114;GO:0044763;GO:0044425;GO:0006952;GO:0006954
CGI_10018640	0.460962	0.0350851	107.066	0.795771	9.64568e-06	101.506	2.07481	2.74797e-26	77.7897	1.11051	Toll-like receptor 1	0.639	defense response ; response to stress	GO:0007165;GO:0006952;GO:0008063;GO:0050776
CGI_10011462	1.08004	0.00307245	13.5697	0.975233	0.00223755	14.6906	1.25887	0.000168484	13.3778	1.10472	Fibrinogen C domain-containing 1	0.7685	defense response ; response to stress	GO:0016021;GO:0006952
CGI_10005641	0.881634	1.11545e-11	231.677	1.22861	5.34015e-30	222.951	1.07546	5.73263e-20	226.421	1.0619	stimulator of interferon genes -like isoform X3 [Crassostrea gigas]	0.6165	defense response ; response to stress	GO:0007165;GO:0006952;GO:0008063;GO:0050776
CGI_10005193	0.952614	2.56454e-09	112.059	1.45443	1.07877e-21	104.606	0.616859	4.55974e-05	124.973	1.00797	Toll-like receptor 2	0.779	defense response ; response to stress	GO:0007165;GO:0016021;GO:0006952;GO:0008063;GO:0050776
CGI_10017375	0.401352	0.000261875	254.21	0.589483	1.88138e-05	249.945	1.96844	1.22763e-29	183.785	0.986424	laccase-like isoform X2	0.7185	defense response ; response to stress	GO:0005507;GO:0016491;GO:0055114;GO:0006952;GO:0006954
CGI_10017787	1.56583	9.81656e-06	23.1585	0.60436	0.0469031	31.0462	0.712321	0.0152484	29.5585	0.960838	microfibril-associated glyco 4-like	0.793	defense response ; response to stress	GO:0006952
CGI_10017728	1.42472	4.94231e-13	49.041	0.584523	0.00578187	62.4822	0.838621	9.456e-07	57.2645	0.949288	toll-like receptor 13 isoform X2 [Crassostrea gigas]	0.6678	defense response ; response to stress	GO:0007165;GO:0016021;GO:0006952;GO:0008063;GO:0050776
CGI_10000434	1.22595	3.26816e-15	141.302	0.723203	1.61478e-07	165.709	0.821123	3.96055e-08	158.483	0.923424	microfibril-associated glyco 4-like	0.861	defense response ; response to stress	GO:0006952
CGI_10027512	0.561039	1.54729e-05	354.618	1.37327	2.72165e-46	304.643	0.711728	1.15592e-09	347.736	0.882013	Toll-like receptor 13	0.6495	defense response ; response to stress	GO:0007165;GO:0045087;GO:0016021;GO:0006952;GO:0008063;GO:0050776
CGI_10016796	0.90023	0.00283745	19.0511	0.73931	0.00539427	20.9187	0.984446	0.000411474	19.2548	0.874662	tenascin-like isoform X2	0.773	defense response ; response to stress	GO:0006952
CGI_10007552	1.46232	2.97891e-14	46.2253	0.683199	0.00107387	57.6215	0.43524	0.0168625	60.8765	0.860254	tolloid 2	0.795	defense response ; response to stress	GO:0006952;GO:0008063;GO:0050776
CGI_10000212	0.547705	0.0355863	97.8067	0.861371	0.0119367	91.6887	1.14169	6.81722e-10	86.2945	0.850256	microfibril-associated glyco 4-like	0.8335	defense response ; response to stress	GO:0006952
CGI_10004837	0.651455	1.27331e-06	144.215	0.604523	1.83502e-05	151.745	0.43841	0.00581422	156.303	0.564796	inhibitor of nuclear factor-kappaB	0.693	defense response ; response to stress	GO:0006952;GO:0008063;GO:0050776
CGI_10000166	0.453279	0.00126982	88.2607	0.775058	6.19549e-06	83.5984	0.440662	0.00590544	90.5468	0.556333	IRAK4-Interleukin-1 receptor-associated kinase 4	0.6175	defense response ; response to stress	GO:0005524;GO:0004674;GO:0006468;GO:0006952;GO:0070098;GO:0050776
CGI_10028146	0.437591	0.00299629	94.0699	0.448658	0.000805568	97.5007	0.342883	0.0222232	98.936	0.409711	Chitinase domain-containing 1	0.7795	defense response ; response to stress	GO:0004568;GO:0008061;GO:0006954;GO:0006032;GO:0044421;GO:0012505;GO:0005773
CGI_10004656	0.28992	0.00126254	383.654	0.340055	0.000883421	392.347	0.376058	6.18022e-06	381.419	0.335344	TBK1-Serine threonine- kinase	0.673	defense response ; response to stress	GO:0003677;GO:0003743;GO:0005524;GO:0008270;GO:0046982;GO:0004672;GO:0006413;GO:0006468;GO:0006952;GO:0008063;GO:0050776
CGI_10028750	0.217183	0.000338786	3335.8	0.468441	1.2447e-15	3209.29	0.269065	5.39903e-06	3349.85	0.31823	NFkB-nuclear factor NF-kappa-B p105 subunit-like	0.767	defense response ; response to stress	GO:0005634;GO:0003677;GO:0003700;GO:0005737;GO:0007165;GO:0006355;GO:0006952;GO:0008063;GO:0050776
CGI_10016954	0.215732	0.00047556	597.569	0.294221	4.84693e-05	605.758	0.21409	0.000754607	610.352	0.241348	TBK1-Serine threonine- kinase	0.672	defense response ; response to stress	GO:0005524;GO:0004672;GO:0006468;GO:0006952;GO:0008063;GO:0050776
CGI_10027692	-0.203667	0.000731977	1172.91	-0.199883	0.000127205	1217.36	-0.203139	9.628e-05	1197.32	-0.20223	adapter CIKS isoform X2	0.628	defense response ; response to stress	GO:0006952;GO:0070098
CGI_10023403	-0.476936	6.24056e-06	138.507	-0.525365	1.81065e-05	146.938	-0.447933	7.06721e-05	139.659	-0.483411	nidogen and EGF-like domain-containing 1 [Crassostrea gigas]	0.451	defense response ; response to stress	GO:0007165;GO:0016021;GO:0006952;GO:0008063;GO:0050776
CGI_10011913	-0.647621	4.59898e-05	2694.6	-0.374944	0.0250251	2495.71	-0.849068	1.35116e-06	3020.62	-0.623878	tyrosinase tyr-3	0.6675	defense response ; response to stress	GO:0004503;GO:0046872;GO:0008168;GO:0055114;GO:0044238;GO:0071704;GO:0032259;GO:0006952;GO:0006954
CGI_10017069	-0.736075	6.35238e-05	6075.66	-0.772472	7.63731e-07	6391.44	-0.535269	1.05166e-05	5642.95	-0.681272	laccase-4-like isoform X2 [Crassostrea gigas]	0.676	defense response ; response to stress	GO:0005507;GO:0016491;GO:0055114;GO:0006952;GO:0006954
CGI_10014670	-0.682338	0.000361986	70.3677	-0.863006	9.14053e-08	79.0693	-0.522488	0.0160355	67.171	-0.689277	laccase-like [Octopus bimaculoides]	0.638	defense response ; response to stress	GO:0005507;GO:0016491;GO:0055114;GO:0006952;GO:0006954
CGI_10026878	-0.634561	0.0287035	178.264	-0.713232	0.0153955	192.535	-0.98915	0.000150821	215.492	-0.778981	Tenascin- partial	0.8465	defense response ; response to stress	GO:0016021;GO:0006952
CGI_10010843	-1.51122	7.30399e-15	338.299	-0.397916	0.000535523	203.44	-0.516437	2.4877e-05	209.713	-0.808523	interleukin-6 receptor subunit beta-like isoform X1 [Crassostrea gigas]	0.498	defense response ; response to stress	GO:0016021;GO:0006952;GO:0070098
CGI_10001122	-1.3771	1.12219e-12	34.3195	-0.888713	6.54802e-05	27.8521	-0.888531	3.90919e-05	27.3428	-1.05145	toll-like receptor 2	0.734	defense response ; response to stress	GO:0007165;GO:0016021;GO:0006952;GO:0008063;GO:0050776
CGI_10014842	-2.0504	4.78097e-16	22.5417	-0.834951	0.00974212	11.9371	-1.06369	0.00166515	13.5034	-1.31635	toll-like receptor 2	0.764	defense response ; response to stress	GO:0007165;GO:0016021;GO:0002376;GO:0006952;GO:0008063;GO:0050776
CGI_10009083	-1.2635	0.00419907	4.01261	-1.65107	0.000145705	5.72719	-1.43464	0.00137047	4.74918	-1.44974	microfibril-associated glyco 4-like	0.5795	defense response ; response to stress	GO:0044699;GO:0006952
CGI_10000136	-1.51571	2.399e-13	152.181	-1.60311	8.8889e-16	165.058	-1.64842	1.08459e-15	166.757	-1.58908	ETS-related transcription factor Elf-3	0.9395	defense response ; response to stress	GO:0060056;GO:0000978;GO:0006366;GO:0005794;GO:0045944;GO:0005654;GO:0030855;GO:0001077;GO:0006954;GO:0050673;GO:0003713;GO:0045892;GO:0001824;GO:0030198
CGI_10022336	-2.1889	3.69817e-33	62.1746	-1.19185	2.23132e-09	36.9254	-1.82342	9.70135e-21	51.135	-1.73472	microfibril-associated glyco 4-like	0.8215	defense response ; response to stress	GO:0006952
CGI_10028763	0.421623	2.8956e-05	681.842	0.75668	1.73129e-11	644.557	0.758362	9.79355e-15	633.594	0.645555	methionine-R-sulfoxide reductase B1	0.859	defense response ; response to stressactin polymerization or depolymerization	GO:0030091;GO:0005634;GO:0006979;GO:0008270;GO:0003779;GO:0005737;GO:0045087;GO:0030041;GO:0015629;GO:0055114;GO:0070191;GO:0033743
CGI_10027605	0.604653	8.78286e-05	1522.36	0.420199	0.00769959	1669.47	0.337237	0.0468706	1682.14	0.45403	allograft inflammatory factor 1 [synthetic construct]	0.81	defense response ; response to stressactin polymerization or depolymerization	GO:0016601;GO:0001891;GO:0048661;GO:0006954;GO:0006911;GO:0071673;GO:0005509;GO:0071495;GO:0048662;GO:0071672;GO:0005829;GO:0032587;GO:0030027;GO:0060255;GO:1900087;GO:0090026;GO:0030041;GO:0014070;GO:0042102;GO:0005884;GO:0009725;GO:0051015;GO:0005634;GO:0001774;GO:2000406;GO:0048471;GO:0097178;GO:0071346;GO:0031325;GO:0051017
CGI_10000428	-1.59655	1.94904e-06	10.8662	-2.49333	4.02678e-17	19.6244	-1.76574	5.73108e-07	12.5554	-1.95188	Methionine-R-sulfoxide reductase B1	0.8095	defense response ; response to stressactin polymerization or depolymerization	GO:0030091;GO:0005634;GO:0006979;GO:0008270;GO:0003779;GO:0005737;GO:0045087;GO:0030041;GO:0015629;GO:0055114;GO:0070191;GO:0033743
CGI_10006394	4.15739	1.58546e-28	20.0632	4.51615	1.1673e-30	20.6732	4.49939	4.68902e-30	20.3104	4.39098	Complement C1q 4	0.7233	defense response to other organism ; response to external stimulus ; defense response ; response to stress	GO:0006952;GO:0042742
CGI_10018411	3.80113	3.81184e-24	18.8696	2.10254	3.60389e-10	22.6527	4.3506	2.23039e-27	18.9292	3.41809	D-galactoside-specific lectin	0.757	defense response to other organism ; response to external stimulus ; defense response ; response to stress	GO:0016021;GO:0030246;GO:0006952;GO:0042742
CGI_10024457	2.46927	2.96393e-09	378.709	2.95707	1.32215e-15	390.409	2.842	6.86621e-12	379.177	2.75612	lysozyme	0.804	defense response to other organism ; response to external stimulus ; defense response ; response to stress	GO:0019835;GO:0008152;GO:0005576;GO:0042742;GO:0003796;GO:0006952;GO:0042742
CGI_10024455	2.26514	1.0332e-07	389.017	3.09774	1.57209e-19	396.535	2.71814	1.01912e-11	391.39	2.69367	Lysozyme	0.747	defense response to other organism ; response to external stimulus ; defense response ; response to stress	GO:0019835;GO:0050829;GO:0008152;GO:0005576;GO:0050830;GO:0003796;GO:0006952;GO:0042742
CGI_10021047	0.967946	0.0274234	82.3942	5.72949	3.75782e-64	84.0731	1.0596	6.09403e-05	119.172	2.58568	Heavy metal-binding HIP	0.7945	defense response to other organism ; response to external stimulus ; defense response ; response to stress	GO:0006952;GO:0042742
CGI_10013346	2.89859	2.48724e-14	9.74608	2.14021	2.32299e-10	11.1973	2.52717	1.85359e-12	10.4386	2.52199	C-type lectin domain family 4 member F	0.7833	defense response to other organism ; response to external stimulus ; defense response ; response to stress	GO:0006952;GO:0042742
CGI_10015052	2.15677	2.58408e-16	32.3545	2.9983	3.49078e-25	30.9231	2.30555	6.45374e-21	32.6656	2.48688	complement C1q 3	0.7205	defense response to other organism ; response to external stimulus ; defense response ; response to stress	GO:0016021;GO:0006952;GO:0042742
CGI_10015980	0.638127	0.0137789	568.547	1.29798	6.97043e-11	506.317	5.16729	9.56897e-182	366.77	2.3678	deoxynucleoside triphosphate triphosphohydrolase SAMHD1-like	0.737	defense response to other organism ; response to external stimulus ; defense response ; response to stress	GO:0008270;GO:0005886;GO:0008832;GO:0005654;GO:0006203;GO:0060337;GO:0003723;GO:0005515;GO:0051289;GO:0045088;GO:0051607;GO:0046061;GO:0032567;GO:0006952;GO:0051607;GO:0039528;GO:0098586;GO:0050776
CGI_10007635	3.37119	1.14455e-65	144.021	2.48	8.88802e-67	161.596	0.942575	4.50394e-11	205.055	2.26459	big defensin 3 [Crassostrea gigas]	0.7385	defense response to other organism ; response to external stimulus ; defense response ; response to stress	GO:0050829;GO:0016021;GO:0050830
CGI_10015755	3.28094	3.31751e-51	64.6167	1.00401	1.53823e-07	91.6807	2.1084	4.76091e-33	74.0083	2.13112	Heavy metal-binding HIP	0.8425	defense response to other organism ; response to external stimulus ; defense response ; response to stress	GO:0016021;GO:0006952;GO:0042742
CGI_10015627	2.12634	5.58018e-22	276.485	2.79127	7.24076e-24	265.612	1.32748	1.33315e-09	322.408	2.0817	Collectin-12 [Crassostrea gigas]	0.652	defense response to other organism ; response to external stimulus ; defense response ; response to stress	GO:0016020;GO:0006952;GO:0042742;GO:000222GO:0008228;GO:0050776
CGI_10014277	2.23465	1.04289e-12	1606.21	2.46754	5.58369e-14	1624.1	1.25051	0.000158245	1925.78	1.98423	complement C1q 4	0.684	defense response to other organism ; response to external stimulus ; defense response ; response to stress	GO:0006952;GO:0042742
CGI_10009049	1.24324	0.000129001	11.7491	3.01139	1.95963e-14	9.36716	1.64356	7.55014e-07	11.0525	1.96607	complement C1q 2	0.555	defense response to other organism ; response to external stimulus ; defense response ; response to stress	GO:0006952;GO:0042742
CGI_10018642	1.7573	1.29213e-36	285.872	1.52896	3.08068e-38	309.663	2.4624	2.25457e-71	266.373	1.91622	complement C1q 3	0.7805	defense response to other organism ; response to external stimulus ; defense response ; response to stress	GO:0005524;GO:0004825;GO:0005737;GO:0016021;GO:0006431;GO:0006952;GO:0042742
CGI_10004135	1.58684	7.19158e-08	34.4923	2.54683	3.42188e-15	31.3162	1.5333	1.91109e-07	35.6658	1.88899	Complement C1q 4	0.7385	defense response to other organism ; response to external stimulus ; defense response ; response to stress	GO:0006952;GO:0042742
CGI_10025773	1.59265	6.93561e-06	1983.1	1.98107	1.00458e-08	1947.23	2.07091	8.44039e-09	1881.64	1.88154	Hemicentin- partial	0.6735	defense response to other organism ; response to external stimulus ; defense response ; response to stress	GO:0016020;GO:0005044;GO:0006898;GO:0006952;GO:0042742
CGI_10026560	1.21235	1.38068e-12	63.8081	1.20076	5.80275e-16	66.6195	3.0717	4.39697e-44	50.5934	1.82827	Aggrecan core	0.6375	defense response to other organism ; response to external stimulus ; defense response ; response to stress	GO:0006952;GO:0042742;GO:000222GO:0008228;GO:0050776
CGI_10009273	2.50156	4.9034e-39	275.98	1.00587	2.06886e-06	365.254	1.81858	4.57606e-41	309.431	1.77534	Multimerin-2 [Crassostrea gigas]	0.6905	defense response to other organism ; response to external stimulus ; defense response ; response to stress	GO:0006952;GO:0042742
CGI_10022972	3.05761	2.78382e-14	220.992	0.496772	0.0101525	372.739	1.53477	1.2847e-05	275.728	1.69638	probable ATP-dependent RNA helicase DHX58	0.6285	defense response to other organism ; response to external stimulus ; defense response ; response to stress	GO:0003676;GO:0005524;GO:0008152;GO:0004386;GO:0006952;GO:0051607;GO:0039528;GO:0098586;GO:0050776
CGI_10005327	2.417	2.78956e-21	64.0524	0.488593	0.043576	97.7217	1.76182	6.38033e-13	71.5408	1.55581	perlucin	0.7925	defense response to other organism ; response to external stimulus ; defense response ; response to stress	GO:0016021;GO:0006952;GO:0042742;GO:000222GO:0008228;GO:0050776
CGI_10004798	1.5138	3.0316e-17	315.253	1.90139	7.87936e-30	307.906	1.20134	1.07694e-11	342.545	1.53885	membrane-attack complex perforin domain-containing [Eimeria acervulina]	0.6095	defense response to other organism ; response to external stimulus ; defense response ; response to stress	GO:0006952;GO:0042742
CGI_10026871	1.22273	0.0118301	2.38342	1.37369	0.005325	2.47656	1.61404	0.00072386	2.17234	1.40349	Macrophage mannose receptor 1	0.527	defense response to other organism ; response to external stimulus ; defense response ; response to stress	GO:0006952;GO:0042742;GO:0008228
CGI_10003004	1.83707	2.43151e-07	26.022	1.5243	1.20826e-05	28.6433	0.755488	0.0240831	34.0324	1.37229	perlucin	0.7835	defense response to other organism ; response to external stimulus ; defense response ; response to stress	GO:0016021;GO:0030246;GO:0006952;GO:0042742;GO:000222GO:0008228;GO:0050776
CGI_10010541	1.30304	9.27667e-24	20352.7	1.49616	2.67189e-11	20137	1.27765	3.78638e-46	20953.5	1.35895	Interferon-induced 44	0.8905	defense response to other organism ; response to external stimulus ; defense response ; response to stress	GO:0008270;GO:0034220;GO:0015031;GO:0016021;GO:0006464;GO:0016310;GO:0016311;GO:0035235;GO:0004970;GO:0005234;GO:0016301;GO:0005622;GO:0006952;GO:0051607;GO:0039528;GO:0098586;GO:0050776
CGI_10003934	1.61392	1.41176e-10	36.2788	1.63992	5.85171e-06	36.2842	0.601068	0.00945228	46.9562	1.28497	complement C1q 3	0.765	defense response to other organism ; response to external stimulus ; defense response ; response to stress	GO:0005581;GO:0006952;GO:0042742
CGI_10014905	1.45324	0.000100658	210.544	1.0797	0.00736923	236.413	1.26099	0.00195841	221.602	1.26464	perlucin [Crassostrea gigas]	0.632	defense response to other organism ; response to external stimulus ; defense response ; response to stress	GO:0006952;GO:0042742;GO:000222GO:0008228;GO:0050776
CGI_10018209	1.41477	6.26544e-05	8.6042	1.22207	0.00122281	9.29157	1.08308	0.00132903	9.63136	1.23997	Interferon-induced helicase C domain-containing 1	0.665	defense response to other organism ; response to external stimulus ; defense response ; response to stress	GO:0016021;GO:0006952;GO:0051607;GO:0039528;GO:0098586;GO:0050776
CGI_10017462	1.2024	0.00027385	21.2849	1.67413	1.05451e-07	20.2195	0.743352	0.0280373	24.4466	1.20663	low affinity immunoglobulin epsilon Fc receptor-like isoform X2	0.7855	defense response to other organism ; response to external stimulus ; defense response ; response to stress	GO:0030246;GO:0006952;GO:0042742;GO:000222GO:0008228;GO:0050776
CGI_10010229	0.708293	3.08959e-05	123.972	0.876204	1.79741e-11	123.773	2.00352	3.77816e-42	97.8788	1.196	complement C1q 3	0.618	defense response to other organism ; response to external stimulus ; defense response ; response to stress	GO:0006952;GO:0042742
CGI_10027984	0.813353	1.0535e-05	53.7133	1.89448	9.91016e-16	44.5787	0.743871	4.74839e-05	55.7447	1.15057	Complement C1q 2	0.7585	defense response to other organism ; response to external stimulus ; defense response ; response to stress	GO:0006952;GO:0042742
CGI_10011011	0.892679	0.00344237	36.5531	1.3486	7.59655e-06	34.2361	0.939305	0.00250255	36.9412	1.06019	metallo ase inhibitor 3-like	1	defense response to other organism ; response to external stimulus ; defense response ; response to stress	GO:0010951;GO:0008191;GO:0006952;GO:0042742
CGI_10009751	0.718527	0.00783456	51.4458	1.05265	7.98947e-05	49.0026	1.37957	2.54105e-05	44.1703	1.05025	galectin-4-like isoform X1 [Crassostrea gigas]	0.5965	defense response to other organism ; response to external stimulus ; defense response ; response to stress	GO:0030246;GO:0006952;GO:0042742;GO:0008228
CGI_10015534	1.81756	8.63091e-14	25.5192	0.584471	0.00663806	35.0005	0.483697	0.0146868	35.4242	0.96191	ADP-ribosylation factor 4-like	0.751	defense response to other organism ; response to external stimulus ; defense response ; response to stress	GO:0005525;GO:0007264;GO:0015031;GO:0005622;GO:0006952;GO:0042742;GO:000222GO:0008228;GO:0050776
CGI_10000983	0.513763	0.035047	565.696	1.3016	3.02443e-09	482.579	0.924223	3.77917e-05	516.413	0.913195	complement C1q tumor necrosis factor-related 3-like	0.757	defense response to other organism ; response to external stimulus ; defense response ; response to stress	GO:0005581;GO:0006952;GO:0042742
CGI_10005003	0.579047	5.86725e-08	283.956	0.818198	6.78708e-15	276.92	0.909303	5.74659e-24	266.105	0.768849	STAT-signal transducer and transcription activator isoform X5 [Stomoxys calcitrans]	0.575	defense response to other organism ; response to external stimulus ; defense response ; response to stress	GO:0005634;GO:0003677;GO:0003700;GO:0007165;GO:0030097;GO:0006355;GO:0004871;GO:0006952;GO:0051607;GO:0097696;GO:0098586;GO:0050776
CGI_10015044	0.628533	3.78473e-06	7083.29	0.889734	0.000300534	6799.94	0.610165	1.92677e-06	7274.76	0.709477	heavy metal-binding HIP-like isoform X2 [Crassostrea gigas]	0.6345	defense response to other organism ; response to external stimulus ; defense response ; response to stress	GO:0005581;GO:0016021;GO:0006952;GO:0042742
CGI_10008793	0.664987	1.81492e-11	919.767	0.950067	3.56554e-25	889.387	0.499693	3.24875e-07	983.938	0.704915	MAC Perforin domain containing	0.696	defense response to other organism ; response to external stimulus ; defense response ; response to stress	GO:0016021;GO:0006952;GO:0042742
CGI_10024533	0.716226	0.000705607	467.948	1.07282	6.47553e-06	442.87	0.320924	0.0255946	539.256	0.703324	complement C1q tumor necrosis factor-related 4-like [Crassostrea gigas]	0.5875	defense response to other organism ; response to external stimulus ; defense response ; response to stress	GO:0016021;GO:0006952;GO:0042742
CGI_10021420	0.358095	1.09921e-05	510.048	1.03408	2.53038e-36	442.598	0.691203	1.738e-20	473.436	0.694459	bactericidal permeability increasing	0.9335	defense response to other organism ; response to external stimulus ; defense response ; response to stress	GO:0005615;GO:0008289;GO:0006952;GO:0042742
CGI_10021456	0.449879	1.68339e-05	205.884	0.612923	1.04785e-05	203.871	0.899146	9.96156e-19	186.136	0.653983	Receptor-type tyrosine- phosphatase T	0.7705	defense response to other organism ; response to external stimulus ; defense response ; response to stress	GO:0003676;GO:0004725;GO:0016021;GO:0035335;GO:0006952;GO:0042742;GO:000222GO:0008228;GO:0050776
CGI_10004025	0.513567	8.07788e-07	464.772	0.951942	4.51582e-22	430.43	0.48418	0.00194413	477.678	0.649897	scavenger receptor	0.5965	defense response to other organism ; response to external stimulus ; defense response ; response to stress	GO:0016020;GO:0005044;GO:0006898;GO:0006952;GO:0042742
CGI_10022970	0.476376	3.68653e-11	3237.19	0.640432	1.43031e-22	3212.47	0.782353	6.53163e-34	3040.09	0.633054	STING-stimulator of interferon genes -like isoform X3 [Crassostrea gigas]	0.5325	defense response to other organism ; response to external stimulus ; defense response ; response to stress	GO:0002218;GO:0007165;GO:0032481;GO:0006952;GO:0051607;GO:0039528;GO:0098586;GO:0050776
CGI_10027739	0.477886	2.71309e-07	272.838	0.740419	1.45734e-14	263.597	0.462636	3.62113e-06	279.679	0.560314	macrophage mannose receptor 1-like	0.505	defense response to other organism ; response to external stimulus ; defense response ; response to stress	GO:0016021;GO:0030246;GO:0006952;GO:0042742;GO:000222GO:0008228;GO:0050776
CGI_10016348	0.747546	2.72826e-08	214.857	0.575938	3.89777e-06	234.091	0.357317	0.00364383	245.337	0.560267	Complement C1q 2	0.7945	defense response to other organism ; response to external stimulus ; defense response ; response to stress	GO:0006952;GO:0042742
CGI_10008794	0.780734	1.99709e-15	182.882	0.45746	0.000490164	207.799	0.335269	0.000232591	211.98	0.524488	hypothetical protein CGI_10008794	0.731	defense response to other organism ; response to external stimulus ; defense response ; response to stress	GO:0016021;GO:0006952;GO:0042742
CGI_10018638	0.292458	0.00636946	317.868	0.398838	0.000344231	319.738	0.845802	1.1741e-12	277.434	0.512366	methionine--tRNA mitochondrial-like	0.719	defense response to other organism ; response to external stimulus ; defense response ; response to stress	GO:0005524;GO:0004825;GO:0006431;GO:0044444;GO:0006952;GO:0042742
CGI_10011253	0.843977	1.23685e-09	1783.65	0.358409	0.0414741	2122.79	0.332423	0.00189423	2106.64	0.511603	von Willebrand factor type EGF and pentraxin domain-containing 1-like	0.601	defense response to other organism ; response to external stimulus ; defense response ; response to stress	GO:0016021;GO:0006952;GO:0042742;GO:000222GO:0008228;GO:0050776
CGI_10003270	0.395432	1.49138e-09	1050.5	0.624175	1.80293e-20	1022.62	0.412268	3.54427e-12	1067.52	0.477292	IRF3-interferon regulatory factor 8	0.5525	defense response to other organism ; response to external stimulus ; defense response ; response to stress	GO:0003700;GO:0030097;GO:0006355;GO:0000975;GO:0044763;GO:0006952;GO:0044424;GO:0006952;GO:0051607;GO:0039528;GO:0098586;GO:0050776
CGI_10019528	0.31801	0.0106628	233.877	0.505682	0.000373837	229.618	0.34567	0.00882692	236.705	0.389787	SOCS-suppressor of cytokine signaling 2-like	0.7005	defense response to other organism ; response to external stimulus ; defense response ; response to stress	GO:0009968;GO:0005622;GO:0035556;GO:0006952;GO:0051607;GO:0097696;GO:0098586;GO:0050776
CGI_10010090	0.349891	0.000199359	1046.81	0.289009	0.000729901	1108.82	0.375537	5.91462e-06	1060.71	0.338146	SOCS-Suppressor of cytokine signaling partial	0.7935	defense response to other organism ; response to external stimulus ; defense response ; response to stress	GO:0040008;GO:0005622;GO:0035556;GO:0006952;GO:0051607;GO:0097696;GO:0098586
CGI_10009063	0.468525	1.95661e-06	311.653	0.292276	0.00350892	341.801	0.231466	0.0441309	342.406	0.330756	thrombospondin-1- partial	0.664	defense response to other organism ; response to external stimulus ; defense response ; response to stress	GO:0016020;GO:0005044;GO:0006898;GO:0006952;GO:0042742
CGI_10020482	0.176935	0.00225768	1191.35	0.233064	1.13308e-05	1215.68	0.137255	0.0154107	1232.13	0.182418	IRF2 binding-interferon regulatory factor 2-binding -like	0.6075	defense response to other organism ; response to external stimulus ; defense response ; response to stress	GO:0006952;GO:0051607;GO:0039528;GO:0098586;GO:0050776
CGI_10018074	0.196862	0.00265685	1095.79	0.146479	0.0417981	1157.39	0.151965	0.0159425	1135.3	0.165102	ras-related Rab-14	0.9515	defense response to other organism ; response to external stimulus ; defense response ; response to stress	GO:0007264;GO:0008152;GO:0090387;GO:0045335;GO:0006886;GO:0042742;GO:0006895;GO:0005525;GO:0006913;GO:0005769;GO:0005802;GO:0003924;GO:0016020;GO:0005829;GO:0055037;GO:0032456
CGI_10013150	-0.258231	0.00496853	1498.09	-0.315122	5.24113e-06	1590.75	-0.179859	0.00218038	1484.96	-0.251071	cation-dependent mannose-6-phosphate receptor-like	0.505	defense response to other organism ; response to external stimulus ; defense response ; response to stress	GO:0016021;GO:0006952;GO:0042742;GO:0008228
CGI_10027827	-0.277211	0.000672356	2772.3	-0.221183	0.000632433	2819.79	-0.352495	1.48981e-07	2913.56	-0.28363	scavenger receptor	0.61	defense response to other organism ; response to external stimulus ; defense response ; response to stress	GO:0016021;GO:0006952;GO:0042742
CGI_10008906	-0.291624	0.00148292	4764.15	-0.332784	0.004273	5034.02	-0.278168	0.000547693	4837.54	-0.300859	complement C1q tumor necrosis factor-related 4-like [Crassostrea gigas]	0.6925	defense response to other organism ; response to external stimulus ; defense response ; response to stress	GO:0006952;GO:0042742
CGI_10021419	-0.4243	2.49593e-06	974.038	-0.271209	4.7203e-05	952.467	-0.302195	0.000387297	947.169	-0.332568	bactericidal permeability increasing	0.6495	defense response to other organism ; response to external stimulus ; defense response ; response to stress	GO:0006952;GO:0042742
CGI_10018872	-0.448416	4.77522e-07	602.207	-0.326636	0.000521002	596.532	-0.319754	0.00153041	584.383	-0.364935	scavenger receptor	0.553	defense response to other organism ; response to external stimulus ; defense response ; response to stress	GO:0016020;GO:0005044;GO:0006898;GO:0006952;GO:0042742
CGI_10021489	-0.543618	2.46854e-10	707.432	-0.371483	0.00268841	686.107	-0.267819	0.00820467	646.653	-0.394307	Complement C1q 4	0.585	defense response to other organism ; response to external stimulus ; defense response ; response to stress	GO:0006952;GO:0042742
CGI_10001545	-0.248531	0.0170836	553.249	-0.464202	1.03335e-07	626.114	-0.610388	6.29796e-15	652.784	-0.44104	Peptidoglycan recognition	0.7305	defense response to other organism ; response to external stimulus ; defense response ; response to stress	GO:0008270;GO:0009253;GO:0045087;GO:0008745;GO:0006952;GO:0042742;GO:0061057;GO:0050776
CGI_10022439	-0.318773	0.00864799	545.171	-0.67465	1.24202e-11	655.407	-0.402025	0.00166691	575.203	-0.465149	complement C1q 4	0.595	defense response to other organism ; response to external stimulus ; defense response ; response to stress	GO:0006952;GO:0042742
CGI_10012379	-0.338495	0.0004942	3562.1	-0.614567	8.16573e-09	4147.26	-0.463074	3.64194e-07	3821.85	-0.472045	Deleted in malignant brain tumors 1	0.601	defense response to other organism ; response to external stimulus ; defense response ; response to stress	GO:0016020;GO:0005044;GO:0006898;GO:0006952;GO:0042742
CGI_10024595	-0.312424	0.0133398	297.274	-0.632798	3.69842e-07	352.429	-0.519522	9.54693e-05	329.982	-0.488248	Complement C1q 4	0.6255	defense response to other organism ; response to external stimulus ; defense response ; response to stress	GO:0005581;GO:0006952;GO:0042742
CGI_10026175	-0.360481	0.0434528	199.015	-0.635741	0.000143296	232.307	-0.471207	0.00248654	212.52	-0.489143	perlucin	0.6315	defense response to other organism ; response to external stimulus ; defense response ; response to stress	GO:0006952;GO:0042742;GO:000222GO:0008228;GO:0050776
CGI_10007808	-0.58723	4.21601e-05	1984.52	-0.570192	6.37854e-06	2044.8	-0.315008	0.00930213	1809.47	-0.49081	Complement C1q 4	0.5289	defense response to other organism ; response to external stimulus ; defense response ; response to stress	GO:0006952;GO:0042742
CGI_10012918	-0.592252	4.89919e-10	1980.95	-0.702942	7.52843e-13	2159.46	-0.239803	0.0172492	1755.96	-0.511666	macrophage-expressed gene 1 -like [Strongylocentrotus purpuratus]	0.541	defense response to other organism ; response to external stimulus ; defense response ; response to stress	GO:0006952;GO:0042742
CGI_10023802	-0.580616	2.50414e-07	1004.93	-0.625241	2.11825e-15	1062.35	-0.338472	3.23477e-05	928.11	-0.514776	CDK5 regulatory subunit-associated 3	0.692	defense response to other organism ; response to external stimulus ; defense response ; response to stress	GO:0051726;GO:0006952;GO:0042742;GO:000222GO:0008228;GO:0050776
CGI_10015011	-0.567626	5.32108e-06	237.888	-0.630645	4.26078e-07	253.795	-0.379871	0.00031074	224.567	-0.526047	Lectin AAEL006456-PA [Aedes aegypti]	0.5825	defense response to other organism ; response to external stimulus ; defense response ; response to stress	GO:0016020;GO:0005488;GO:0006952;GO:0042742;GO:000222GO:0008228;GO:0050776
CGI_10022092	-0.555952	1.19432e-06	2211.23	-0.553143	1.38719e-07	2294.22	-0.475659	5.5475e-07	2181.6	-0.528252	complement C1q 4 isoform X2 [Crassostrea gigas]	0.637	defense response to other organism ; response to external stimulus ; defense response ; response to stress	GO:0006952;GO:0042742
CGI_10015449	-0.815578	1.20198e-23	791.339	-0.621455	6.60364e-19	755.013	-0.225955	0.0164715	633.714	-0.554329	galectin-4-like isoform X1 [Crassostrea gigas]	0.753	defense response to other organism ; response to external stimulus ; defense response ; response to stress	GO:0030246;GO:0006952;GO:0042742;GO:0008228
CGI_10006058	-0.770655	8.62114e-08	1101.78	-0.546774	0.000229093	1038.16	-0.383154	0.00407362	952.233	-0.566861	complement C1q tumor necrosis factor-related 3-like	0.5895	defense response to other organism ; response to external stimulus ; defense response ; response to stress	GO:0006952;GO:0042742
CGI_10007769	-0.81858	3.46846e-14	462.891	-0.589821	1.80897e-10	434.852	-0.482333	1.65774e-06	408.378	-0.630245	complement C1q 4	0.6025	defense response to other organism ; response to external stimulus ; defense response ; response to stress	GO:0006952;GO:0042742
CGI_10025848	-0.744044	4.04431e-07	5975.89	-0.853629	1.91084e-11	6510.74	-0.300016	0.0205579	5054.93	-0.632563	alpha-N-acetylgalactosamine-specific lectin-like [Crassostrea gigas]	0.5425	defense response to other organism ; response to external stimulus ; defense response ; response to stress	GO:0006952;GO:0042742;GO:000222GO:0008228;GO:0050776
CGI_10023035	-0.833609	5.26084e-08	128.994	-0.467847	0.00219642	114.196	-0.609022	0.000529925	119.24	-0.636826	salivary C-type lectin [Culex quinquefasciatus]	0.6185	defense response to other organism ; response to external stimulus ; defense response ; response to stress	GO:0006952;GO:0042742;GO:000222GO:0008228;GO:0050776
CGI_10013070	-0.941533	0.000499991	118.695	-0.338323	0.0278201	91.907	-0.632353	8.47204e-05	102.082	-0.637403	Heavy metal-binding HIP	0.8835	defense response to other organism ; response to external stimulus ; defense response ; response to stress	GO:0016021;GO:0006952;GO:0042742
CGI_10027557	-0.753704	0.000290423	1574.17	-0.428058	0.0168565	1411.41	-0.792782	1.35116e-06	1624.34	-0.658181	Macrophage mannose receptor 1	0.6435	defense response to other organism ; response to external stimulus ; defense response ; response to stress	GO:0006952;GO:0042742;GO:000222GO:0008228;GO:0050776
CGI_10015041	-0.604902	1.71737e-05	1361.01	-0.645414	0.000204257	1443.95	-0.73919	5.3965e-09	1471.69	-0.663169	collagen alpha-2(VIII) chain-like [Crassostrea gigas]	0.7535	defense response to other organism ; response to external stimulus ; defense response ; response to stress	GO:0005581;GO:0016021;GO:0006952;GO:0042742
CGI_10003643	-1.02092	9.49517e-17	937.041	-0.612703	0.000154678	811.973	-0.390388	0.00134692	724.925	-0.67467	C-type mannose receptor 2	0.651	defense response to other organism ; response to external stimulus ; defense response ; response to stress	GO:0006952;GO:0042742;GO:000222GO:0008228;GO:0050776
CGI_10015759	-0.862428	1.81322e-08	255.436	-0.51889	0.00269174	228.224	-0.67416	8.56816e-05	239.874	-0.685159	perlucin [Crassostrea gigas]	0.649	defense response to other organism ; response to external stimulus ; defense response ; response to stress	GO:0006952;GO:0042742;GO:000222GO:0008228;GO:0050776
CGI_10011386	-1.10632	7.3876e-07	143.04	-0.39136	0.0425205	105.844	-0.609369	8.14618e-06	113.524	-0.702348	Complement C1q 4	0.7835	defense response to other organism ; response to external stimulus ; defense response ; response to stress	GO:0006952;GO:0042742
CGI_10021995	-0.839492	0.00212495	2493.97	-0.636598	0.0168191	2338.76	-0.771183	0.00126537	2437.13	-0.749091	CD109 antigen-like	0.8275	defense response to other organism ; response to external stimulus ; defense response ; response to stress	GO:0005615;GO:0003723;GO:0004866;GO:0010951;GO:0006952;GO:0042742;GO:0008228
CGI_10021050	-0.711376	0.00150366	154.086	-0.69435	0.000694138	158.264	-0.916086	4.64515e-08	171.412	-0.773937	Complement C1q 4	0.7865	defense response to other organism ; response to external stimulus ; defense response ; response to stress	GO:0006952;GO:0042742
CGI_10008157	-0.638502	0.000503418	118.618	-0.80931	1.54426e-11	132.386	-0.912344	8.75679e-15	136.158	-0.786719	gamma-interferon-inducible lysosomal thiol reductase-like	0.7665	defense response to other organism ; response to external stimulus ; defense response ; response to stress	GO:0006952;GO:0051607;GO:0098586
CGI_10021291	-1.01199	1.72306e-08	2319.57	-0.435697	4.13545e-05	1846.68	-0.913491	1.03533e-09	2244.19	-0.787061	Complement C1q 4	0.6154	defense response to other organism ; response to external stimulus ; defense response ; response to stress	GO:0006952;GO:0042742
CGI_10011669	-0.876797	3.82016e-10	388.931	-0.729167	3.95692e-05	379.725	-0.850423	8.99969e-12	391.559	-0.818796	perlucin-like	0.642	defense response to other organism ; response to external stimulus ; defense response ; response to stress	GO:0006952;GO:0042742;GO:000222GO:0008228;GO:0050776
CGI_10022082	-1.00377	4.27818e-43	659.684	-0.833094	3.51451e-21	634.702	-0.62697	2.03901e-15	569.584	-0.82128	methyltransferase DDB_G0268948 isoform X1 [Aplysia californica]	0.6785	defense response to other organism ; response to external stimulus ; defense response ; response to stress	GO:0008168;GO:0032259;GO:0006952;GO:0042742;GO:000222GO:0008228;GO:0050776
CGI_10022633	-0.650374	2.57956e-05	376.749	-0.951096	2.04588e-13	447.372	-1.11566	3.22387e-16	475.985	-0.905711	complement C1q subcomponent subunit A-like isoform X2 [Crassostrea gigas]	0.73	defense response to other organism ; response to external stimulus ; defense response ; response to stress	GO:0005581;GO:0016020;GO:0006952;GO:0042742
CGI_10018514	-0.842393	0.00351633	16.6545	-0.689496	0.0255795	16.1046	-1.26787	6.68081e-06	21.3694	-0.933253	GM16478 [Drosophila sechellia]	0.545	defense response to other organism ; response to external stimulus ; defense response ; response to stress	GO:0006952;GO:0042742;GO:000222GO:0008228;GO:0050776
CGI_10000389	-0.923809	0.00174346	72.1737	-1.14063	1.16085e-05	82.7815	-0.806152	0.00642977	69.1994	-0.956865	metallo ase inhibitor 3-like	0.614	defense response to other organism ; response to external stimulus ; defense response ; response to stress	GO:0010951;GO:0005576;GO:0008191;GO:0006952;GO:0042742
CGI_10012721	-0.625576	0.0159936	349.744	-0.666859	0.00204817	367.787	-1.72114	1.81967e-22	613.619	-1.00453	complement C1q 4	0.625	defense response to other organism ; response to external stimulus ; defense response ; response to stress	GO:0006952;GO:0042742
CGI_10013066	-0.625636	0.00801249	83.2666	-0.689376	5.76016e-05	88.2753	-1.73206	1.75569e-34	145.551	-1.01569	Complement C1q tumor necrosis factor-related 3	0.8735	defense response to other organism ; response to external stimulus ; defense response ; response to stress	GO:0016021;GO:0006952;GO:0042742
CGI_10014768	-0.697282	0.00116363	588.89	-0.958302	8.24287e-07	689.778	-1.41186	1.9975e-16	848.326	-1.02248	interferon alpha-inducible 27 2B	0.805	defense response to other organism ; response to external stimulus ; defense response ; response to stress	GO:0016021;GO:0006952;GO:0051607;GO:0039528;GO:0098586;GO:0050776
CGI_10021052	-1.12661	0.00016062	163.771	-1.13069	1.79745e-05	167.126	-1.0802	7.02543e-05	160.212	-1.1125	Complement C1q 4	0.7785	defense response to other organism ; response to external stimulus ; defense response ; response to stress	GO:0006952;GO:0042742
CGI_10003957	-1.41815	3.15389e-27	199.005	-1.12847	1.11427e-29	177.528	-0.845712	6.78435e-11	153.043	-1.13078	Complement C1q tumor necrosis factor-related 3	0.856	defense response to other organism ; response to external stimulus ; defense response ; response to stress	GO:0016021;GO:0006952;GO:0042742
CGI_10010506	-0.98623	7.91942e-06	62.5003	-2.07947	1.63163e-34	115.965	-0.454808	0.0189198	49.5389	-1.1735	Complement C1q tumor necrosis factor-related 3	0.6585	defense response to other organism ; response to external stimulus ; defense response ; response to stress	GO:0005634;GO:0006915;GO:0006952;GO:0042742
CGI_10020666	-0.904354	5.12391e-05	154.399	-1.57645	3.37724e-24	222.233	-1.16229	3.44582e-12	176.275	-1.21437	complement C1q 3	0.853	defense response to other organism ; response to external stimulus ; defense response ; response to stress	GO:0005581;GO:0008152;GO:0016787;GO:0006952;GO:0042742
CGI_10009934	-1.10353	0.0254544	2.29115	-1.48034	0.00199281	3.08852	-1.06332	0.035324	2.05539	-1.21573	Receptor-type tyrosine- phosphatase kappa	0.696	defense response to other organism ; response to external stimulus ; defense response ; response to stress	GO:0006952;GO:0042742;GO:000222GO:0008228;GO:0050776
CGI_10021493	-1.52997	3.03893e-17	286.163	-0.939844	9.00917e-08	218.907	-1.25108	2.56823e-17	249.038	-1.2403	complement C1q 2 [Crassostrea gigas]	0.567	defense response to other organism ; response to external stimulus ; defense response ; response to stress	GO:0006952;GO:0042742
CGI_10027935	-0.71484	0.0369207	46.7419	-1.47422	4.46753e-09	70.648	-1.59857	4.49365e-12	73.5632	-1.26254	perlucin [Crassostrea gigas]	0.686	defense response to other organism ; response to external stimulus ; defense response ; response to stress	GO:0006952;GO:0042742;GO:000222GO:0008228;GO:0050776
CGI_10024231	-0.723159	0.0391744	29.5392	-1.37817	4.73894e-06	43.2939	-1.7199	1.9552e-09	51.7836	-1.27374	C1q-domain-containing partial	0.682	defense response to other organism ; response to external stimulus ; defense response ; response to stress	GO:0016020;GO:0006952;GO:0042742
CGI_10028836	-1.32058	0.00354739	8.089	-0.921854	0.0397215	5.63794	-1.58192	5.71833e-05	8.3657	-1.27479	Macrophage mannose receptor partial	0.535	defense response to other organism ; response to external stimulus ; defense response ; response to stress	GO:0006952;GO:0042742;GO:000222GO:0008228;GO:0050776
CGI_10003440	-0.445688	0.0300755	71.3855	-2.64133	1.8217e-59	238.682	-0.904949	6.16821e-08	89.1016	-1.33066	CD209 antigen D	0.6745	defense response to other organism ; response to external stimulus ; defense response ; response to stress	GO:0006952;GO:0042742;GO:000222GO:0008228;GO:0050776
CGI_10013388	-0.911076	5.0787e-07	105.594	-1.81223	2.22876e-30	174.707	-1.5305	1.7908e-18	147.501	-1.41794	hemagglutinin amebocyte aggregation factor-like	0.5445	defense response to other organism ; response to external stimulus ; defense response ; response to stress	GO:0006952;GO:0042742
CGI_10009046	-1.96465	2.18594e-15	134.604	-1.93909	1.70013e-44	128.006	-0.77058	4.2322e-05	69.3377	-1.55811	complement C1q 4	0.624	defense response to other organism ; response to external stimulus ; defense response ; response to stress	GO:0006952;GO:0042742
CGI_10009984	-1.86093	1.70111e-27	308.828	-1.10377	4.44561e-08	215.118	-1.77071	1.94283e-19	302.607	-1.57847	Complement C1q 4	0.6135	defense response to other organism ; response to external stimulus ; defense response ; response to stress	GO:0006952;GO:0042742
CGI_10010808	-1.36579	0.00444929	1.9863	-1.75857	0.000183856	2.75513	-1.72268	0.000320327	2.89791	-1.61568	complement C1q 4	0.97	defense response to other organism ; response to external stimulus ; defense response ; response to stress	GO:0003676;GO:0008270;GO:0006952;GO:0042742
CGI_10002140	-1.14328	1.78486e-09	44.7365	-2.18634	5.43576e-26	84.4023	-1.54826	1.59046e-14	56.7525	-1.62596	complement C1q 4	0.807	defense response to other organism ; response to external stimulus ; defense response ; response to stress	GO:0006952;GO:0042742
CGI_10027638	-2.15747	9.17388e-12	14.7433	-1.36518	0.000166359	9.27282	-1.48973	9.18527e-05	10.1759	-1.67079	hypothetical protein CGI_10027638	0.88	defense response to other organism ; response to external stimulus ; defense response ; response to stress	GO:0006952;GO:0042742;GO:000222GO:0008228;GO:0050776
CGI_10027085	-1.6869	8.52146e-11	832.885	-1.74671	2.42102e-08	942.003	-1.69847	4.32272e-11	849.888	-1.71069	hemagglutinin amebocyte aggregation factor-like	0.7605	defense response to other organism ; response to external stimulus ; defense response ; response to stress	GO:0006952;GO:0042742
CGI_10008112	-2.09056	1.51204e-34	89.2923	-0.853373	9.3252e-05	48.1992	-2.24142	5.58871e-23	103.987	-1.72845	complement C1q 4	0.722	defense response to other organism ; response to external stimulus ; defense response ; response to stress	GO:0006952;GO:0042742
CGI_10027019	-1.05576	0.0118056	5.71569	-2.10809	2.48613e-09	11.515	-2.43932	5.2792e-14	13.6284	-1.86772	Complement C1q 2	0.8295	defense response to other organism ; response to external stimulus ; defense response ; response to stress	GO:0005581;GO:0006952;GO:0042742
CGI_10025495	-1.37028	8.24781e-07	190.392	-2.04918	4.97498e-60	267.454	-2.2138	3.29763e-35	297.692	-1.87775	complement C1q 4	0.595	defense response to other organism ; response to external stimulus ; defense response ; response to stress	GO:0006952;GO:0042742
CGI_10006368	-1.94267	9.49777e-24	1650.74	-2.11718	3.79248e-31	1884.56	-1.71038	6.49751e-22	1457.33	-1.92341	Low affinity immunoglobulin epsilon Fc receptor	0.7075	defense response to other organism ; response to external stimulus ; defense response ; response to stress	GO:0006952;GO:0042742;GO:000222GO:0008228;GO:0050776
CGI_10015346	-0.937672	0.0111554	16.6093	-0.906389	0.00156925	16.2704	-3.95529	1.05405e-102	101.193	-1.93312	Complement C1q tumor necrosis factor-related 3	0.654	defense response to other organism ; response to external stimulus ; defense response ; response to stress	GO:0006952;GO:0042742
CGI_10012045	-2.27753	1.09355e-43	78.4854	-1.73535	2.2983e-13	61.5388	-1.86607	7.85115e-26	62.8249	-1.95965	complement C1q 3	0.8195	defense response to other organism ; response to external stimulus ; defense response ; response to stress	GO:0000166;GO:0044763;GO:0006952;GO:0042742
CGI_10012046	-1.64877	1.276e-11	20.852	-2.73409	5.97595e-33	42.2656	-1.69983	4.25408e-12	21.797	-2.02756	complement C1q 3	0.843	defense response to other organism ; response to external stimulus ; defense response ; response to stress	GO:0005634;GO:0005524;GO:0006281;GO:0005581;GO:0007049;GO:0006952;GO:0042742
CGI_10017356	-1.27673	0.000100561	180.5	-2.73183	7.41304e-51	406.237	-2.64126	3.11302e-58	370.823	-2.21661	2'-5' OAS : 2 -5 -oligoadenylate synthase 1A-like	0.5565	defense response to other organism ; response to external stimulus ; defense response ; response to stress	GO:0005524;GO:0016779;GO:0006955;GO:0003725;GO:0008152;GO:0016021;GO:0051607;GO:0006952;GO:0051607;GO:0039528;GO:0098586;GO:0050776
CGI_10023844	-1.3888	0.000743833	8.51001	-2.85419	3.14606e-19	21.6016	-2.48746	8.31131e-14	16.51	-2.24348	cerebellin-3-like isoform X1 [Crassostrea gigas]	0.6045	defense response to other organism ; response to external stimulus ; defense response ; response to stress	GO:0006952;GO:0042742
CGI_10007353	-2.09472	1.77996e-11	100.37	-2.59232	3.44263e-22	135.446	-2.15509	6.05228e-16	98.8416	-2.28071	Aggrecan core	0.646	defense response to other organism ; response to external stimulus ; defense response ; response to stress	GO:0006952;GO:0042742;GO:000222GO:0008228;GO:0050776
CGI_10022877	-2.31923	1.06101e-16	21.3736	-3.81064	1.49136e-41	65.986	-1.06572	0.00519785	10.4273	-2.39853	Complement C1q tumor necrosis factor-related 3	0.8345	defense response to other organism ; response to external stimulus ; defense response ; response to stress	GO:0016021;GO:0006952;GO:0042742
CGI_10000824	-2.30511	1.56612e-14	44.2626	-2.53841	2.79861e-36	46.8602	-2.56282	3.32217e-21	50.7689	-2.46878	Heavy metal-binding HIP	0.7565	defense response to other organism ; response to external stimulus ; defense response ; response to stress	GO:0006952;GO:0042742
CGI_10015610	-1.83288	1.88119e-16	73.6207	-2.66454	1.10341e-55	121.798	-3.10346	6.4462e-54	164.308	-2.53363	complement C1q 2 [Notothenia coriiceps]	0.5195	defense response to other organism ; response to external stimulus ; defense response ; response to stress	GO:0006952;GO:0042742
CGI_10021051	-2.46478	3.41306e-17	54.7094	-2.30957	1.09164e-19	47.7425	-2.86844	2.40981e-47	63.4617	-2.54759	Heavy metal-binding HIP	0.7745	defense response to other organism ; response to external stimulus ; defense response ; response to stress	GO:0006952;GO:0042742
CGI_10009985	-2.39961	2.85258e-09	6.15488	-2.3884	1.61402e-08	6.76727	-3.44099	1.38826e-20	13.2753	-2.743	complement C1q 3	0.6935	defense response to other organism ; response to external stimulus ; defense response ; response to stress	GO:0006952;GO:0042742
CGI_10023014	-3.17427	1.97402e-93	147.815	-3.01912	5.54683e-96	137.316	-2.2747	3.37495e-51	85.182	-2.8227	complement C1q 4	0.817	defense response to other organism ; response to external stimulus ; defense response ; response to stress	GO:0006952;GO:0042742
CGI_10018363	-2.49564	7.10878e-25	104.735	-4.02846	2.55489e-141	272.093	-2.41431	1.78277e-50	93.3505	-2.97947	perlucin	0.8425	defense response to other organism ; response to external stimulus ; defense response ; response to stress	GO:0016021;GO:0030246;GO:0006952;GO:0042742;GO:000222GO:0008228;GO:0050776
CGI_10003119	-5.42978	3.96275e-81	98.1369	-3.50826	2.38419e-25	24.7878	-1.86624	1.36931e-06	7.09088	-3.60143	Neurocan core partial	0.619	defense response to other organism ; response to external stimulus ; defense response ; response to stress	GO:0006952;GO:0042742;GO:000222GO:0008228;GO:0050776
CGI_10021658	-5.06998	1.09136e-246	1660.94	-4.31765	2.39765e-194	1011.71	-1.79884	1.80061e-17	207	-3.72883	C-type lectin-like	0.5845	defense response to other organism ; response to external stimulus ; defense response ; response to stress	GO:0006952;GO:0042742;GO:000222GO:0008228;GO:0050776
CGI_10012320	-5.28821	5.37348e-46	74.0093	-4.59542	8.17011e-34	29.3631	-3.70292	4.31501e-20	12.8919	-4.52885	complement C1q 2	0.8191	defense response to other organism ; response to external stimulus ; defense response ; response to stress	GO:0006952;GO:0042742
CGI_10000764	1.68424	0.000219274	3.82875	2.25739	1.05173e-06	3.60741	2.2441	1.42347e-06	3.55678	2.06191	hypothetical protein CGI_10000764	0.775	response to external stimulus	GO:0019050;GO:0016021
CGI_10003188	1.74025	1.84146e-07	14.5394	1.8769	1.05227e-07	14.7234	2.0909	3.31838e-09	14.036	1.90268	E3 ubiquitin- ligase KCMF1	0.8581	response to external stimulus	GO:0008270;GO:0008152;GO:0016021;GO:0016874;GO:0098586;GO:0016567
CGI_10018631	0.95616	0.0370355	5.2829	2.23493	1.06322e-06	4.15608	1.59224	0.000507818	4.62148	1.59444	Exonuclease 3 -5 domain-containing 1	0.6495	response to external stimulus	GO:0003676;GO:0008408;GO:0090305;GO:0098586
CGI_10001309	2.15198	2.89358e-24	287.329	1.33261	2.16996e-32	345.14	1.04504	7.28466e-12	359.418	1.50988	E3 ubiquitin- ligase DZIP3	0.7595	response to external stimulus	GO:0008152;GO:0016874;GO:0098586;GO:0016567
CGI_10025472	0.878024	4.14659e-10	106.543	1.49983	8.70881e-36	97.0923	0.81728	2.02908e-11	110.496	1.06505	Poly [ADP-ribose] polymerase 14	0.7015	response to external stimulus	GO:0016021;GO:0098586
CGI_10009619	0.807029	4.30497e-11	122.136	1.04176	5.4124e-20	119.971	0.898511	1.30007e-14	121.765	0.915768	poly [ADP-ribose] polymerase 12-like isoform X1 [Ficedula albicollis]	0.6605	response to external stimulus	GO:0008152;GO:0003950;GO:0098586
CGI_10000932	1.03401	0.00452388	63.2737	0.748464	0.0340967	71.5162	0.91652	0.0107123	66.8465	0.899664	PREDICTED: uncharacterized protein LOC105324273 [Crassostrea gigas]	0.7867	response to external stimulus	GO:0009607;GO:0016021
CGI_10007404	0.686244	1.31571e-08	159.077	1.09807	1.00059e-17	149.393	0.681352	1.00182e-07	162.713	0.821887	poly [ADP-ribose] polymerase 12-like	0.517	response to external stimulus	GO:0046872;GO:0016021;GO:0098586
CGI_10004722	0.753549	0.000583354	122.723	0.879402	1.8698e-06	123.695	0.832294	0.000142226	122.66	0.821748	Ras-related Rab-1A	0.77	response to external stimulus	GO:1902580;GO:0007264;GO:0008152;GO:0022607;GO:0005794;GO:0006886;GO:0006996;GO:0005525;GO:0006913;GO:0006888;GO:0006928;GO:0051650;GO:0003924;GO:0006914;GO:0016020;GO:0031982;GO:0051704;GO:0032940
CGI_10024392	0.836395	2.0413e-13	1908.43	0.593911	5.57998e-06	2113.95	1.02102	7.49793e-18	1863.4	0.817109	probable ATP-dependent RNA helicase DHX58	0.661	response to external stimulus	GO:0003677;GO:0005524;GO:0008152;GO:0004386;GO:0039528;GO:0098586;GO:0050776
CGI_10021627	0.760107	3.50979e-12	130.921	0.634388	1.8658e-06	140.444	1.01439	3.121e-15	125.255	0.802961	poly [ADP-ribose] polymerase 14-like	0.9267	response to external stimulus	GO:0000166;GO:0003676;GO:0008152;GO:0003950;GO:0098586
CGI_10001488	0.518084	0.00449721	54.5967	0.809306	6.03125e-07	52.5048	1.03887	1.0418e-09	48.6225	0.788753	E3 ubiquitin- ligase UBR3	0.7	response to external stimulus	GO:0008270;GO:0008152;GO:0016874;GO:0098586;GO:0016567
CGI_10009801	0.578465	0.000168056	152.784	1.22061	3.16067e-17	135.566	0.445502	0.00170292	162.256	0.748192	E3 ubiquitin- ligase HERC2	0.667	response to external stimulus	GO:0004842;GO:0046872;GO:0016567;GO:0098586;GO:0016567
CGI_10004998	0.74808	1.09448e-07	86.3212	0.374018	0.00749034	99.9139	1.11692	1.47563e-16	80.6345	0.746339	E3 ubiquitin- ligase HERC2	0.6285	response to external stimulus	GO:0004842;GO:0046872;GO:0016567;GO:0098586;GO:0016567
CGI_10004049	0.675044	0.000806838	43.6022	0.652603	0.000300108	45.644	0.872901	1.5337e-06	42.3575	0.733516	E3 ubiquitin- ligase HERC2	0.665	response to external stimulus	GO:0004842;GO:0046872;GO:0016567;GO:0098586;GO:0016567
CGI_10027062	0.733854	1.34517e-05	99.3818	0.714718	1.0899e-07	103.986	0.57453	1.52392e-05	106.207	0.674367	E3 ubiquitin- ligase MIB2	0.559	response to external stimulus	GO:0004842;GO:0046872;GO:0046983;GO:0016874;GO:0016567;GO:0098586;GO:0016567
CGI_10009349	0.439602	8.19271e-05	267.749	0.931327	3.00325e-15	243.577	0.504082	4.73003e-05	268.083	0.625004	E3 ubiquitin- ligase MIB2	0.591	response to external stimulus	GO:0004842;GO:0046872;GO:0016567;GO:0098586;GO:0016567
CGI_10005768	0.623452	7.51764e-14	368.62	0.65772	6.92083e-09	378.768	0.534617	1.78593e-11	385.937	0.605263	probable ATP-dependent RNA helicase DDX31	0.7	response to external stimulus	GO:0005524;GO:0010501;GO:0042254;GO:0005794;GO:0005730;GO:0004004;GO:0044822;GO:0039528;GO:0098586;GO:0050776
CGI_10028498	0.715034	4.71345e-06	313.858	0.536305	7.03483e-07	343.644	0.480313	7.81414e-07	343.47	0.577217	E3 ubiquitin- ligase TRIM71-like [Crassostrea gigas]	0.555	response to external stimulus	GO:0098586;GO:0016567
CGI_10027063	0.483658	0.00560841	124.751	0.492198	0.00339456	129.3	0.525762	0.000906409	126.004	0.500539	E3 ubiquitin- ligase HECTD1-like	0.8513	response to external stimulus	GO:0004842;GO:0046872;GO:0016874;GO:0016567;GO:0098586;GO:0016567
CGI_10026441	0.273249	0.0386901	3550.79	0.852747	1.74864e-10	3128.2	0.350888	0.0332566	3535.01	0.492295	E3 ubiquitin- ligase MIB2	0.5585	response to external stimulus	GO:0004842;GO:0008270;GO:0016021;GO:0016874;GO:0016567;GO:0098586;GO:0016567
CGI_10022300	0.477528	0.00422143	59.2719	0.518619	0.00104163	60.8476	0.431169	0.00468039	61.5138	0.475772	E3 ubiquitin- ligase HERC2	0.6855	response to external stimulus	GO:0004842;GO:0046872;GO:0016874;GO:0016567;GO:0098586;GO:0016567
CGI_10027065	0.70019	2.32269e-07	341.61	0.406977	0.00383172	385.979	0.316092	0.010044	390.255	0.47442	E3 ubiquitin- ligase MIB2	0.517	response to external stimulus	GO:0004842;GO:0046872;GO:0016874;GO:0016567;GO:0098586;GO:0016567
CGI_10009620	0.547966	1.70634e-06	370.103	0.404417	7.73132e-05	401.68	0.419612	9.03612e-05	392.79	0.457332	poly [ADP-ribose] polymerase 12-like [Coturnix japonica]	0.6765	response to external stimulus	GO:0008152;GO:0003950;GO:0098586
CGI_10009112	0.605831	9.48264e-18	407.922	0.262483	0.000494406	469.386	0.49526	3.55672e-10	429.876	0.454525	E3 ubiquitin- ligase HACE1 isoform X2	0.724	response to external stimulus	GO:0005634;GO:0004842;GO:0061025;GO:0070936;GO:0007030;GO:0000139;GO:0030334;GO:0017137;GO:0016874;GO:0042787;GO:0098586;GO:0016567
CGI_10021893	0.543858	5.22052e-09	10844.1	0.282398	0.0172287	12185.6	0.509642	7.43185e-08	11181.1	0.445299	E3 ubiquitin- ligase HERC2	0.7435	response to external stimulus	GO:0004842;GO:0046872;GO:0016020;GO:0016874;GO:0016567;GO:0098586;GO:0016567
CGI_10012437	0.366965	5.56456e-08	1057.31	0.507523	2.92796e-14	1054.36	0.426714	4.47508e-07	1060.03	0.433734	E3 ubiquitin- ligase HECTD1	0.598	response to external stimulus	GO:0004842;GO:0046872;GO:0016874;GO:0016567;GO:0098586;GO:0016567
CGI_10015031	0.414529	0.000111623	241.314	0.480272	2.18816e-08	246.209	0.402951	6.03181e-07	247.493	0.432584	poly [ADP-ribose] polymerase 15-like [Crassostrea gigas]	0.5605	response to external stimulus	GO:0008152;GO:0003950;GO:0098586
CGI_10011104	0.382348	4.82421e-05	444.617	0.515792	1.77989e-11	444.672	0.363199	8.00059e-06	456.93	0.420446	E3 ubiquitin- ligase TRIM56	0.516	response to external stimulus	GO:0008270;GO:0005622;GO:0098586;GO:0016567
CGI_10005452	0.520382	3.28638e-07	6049.79	0.3669	3.43222e-05	6582.77	0.364896	4.94222e-05	6471.36	0.417393	E3 ubiquitin- ligase RNF213-like	0.7165	response to external stimulus	GO:0016887;GO:0004842;GO:0008270;GO:0016567;GO:0098586;GO:0016567
CGI_10009041	0.263764	6.68457e-05	2687.42	0.567708	1.09982e-13	2550.1	0.39358	6.76014e-07	2635.64	0.408351	probable E3 ubiquitin- ligase HECTD4 isoform X1	0.7315	response to external stimulus	GO:0004842;GO:0016874;GO:0016567;GO:0098586;GO:0016567
CGI_10020677	0.498429	1.47759e-15	1379.6	0.264574	8.75402e-05	1539.21	0.410612	5.85855e-14	1445.9	0.391205	E3 ubiquitin- ligase MIB2	0.5785	response to external stimulus	GO:0004842;GO:0046872;GO:0016874;GO:0016567;GO:0098586;GO:0016567
CGI_10012482	0.315483	0.00362339	616.628	0.542992	1.87426e-08	599.086	0.241118	0.0387786	644.84	0.366531	poly [ADP-ribose] polymerase 15-like [Crassostrea gigas]	0.5735	response to external stimulus	GO:0008152;GO:0003950;GO:0098586
CGI_10012483	0.236801	0.0323344	1124.89	0.468279	5.91869e-06	1089	0.363981	0.00621084	1103.09	0.356353	Poly [ADP-ribose] polymerase 14	0.6025	response to external stimulus	GO:0008152;GO:0003950;GO:0098586
CGI_10005336	0.405363	1.15267e-07	490.116	0.26218	0.000201358	532.836	0.349408	3.92059e-06	509.424	0.338984	poly [ADP-ribose] polymerase partial	0.65	response to external stimulus	GO:0098586
CGI_10012741	0.259577	0.00557634	2207.93	0.400503	1.5944e-07	2196.86	0.348988	3.18706e-06	2192.49	0.336356	DNA damage-regulated autophagy modulator 1-like [Crassostrea gigas]	0.5915	response to external stimulus	GO:0016021;GO:0010506;GO:0098586
CGI_10007224	0.227213	0.000130645	2853.82	0.386035	2.57949e-11	2822.5	0.377289	9.57681e-09	2779.77	0.330179	active breakpoint cluster region-related -like isoform X2	0.6305	response to external stimulus	GO:0035023;GO:0050728;GO:0005096;GO:0043114;GO:0005089;GO:0002692;GO:0007420;GO:0043314;GO:0060313;GO:0005886;GO:0043547;GO:0042472;GO:0005829;GO:0032496;GO:0050766;GO:0030036;GO:0035556;GO:0050885
CGI_10014040	0.456219	2.32657e-11	1372.32	0.315839	5.70688e-05	1488.04	0.205817	0.0149847	1513.67	0.325958	E3 ubiquitin- ligase MIB2	0.599	response to external stimulus	GO:0004842;GO:0008270;GO:0016874;GO:0016567;GO:0098586;GO:0016567
CGI_10014180	0.198226	0.0104834	1031.91	0.476276	9.13515e-13	984.725	0.283769	0.000166291	1025.36	0.319424	ubiquitin thioesterase L96	0.6625	response to external stimulus	GO:0098586;GO:0016567
CGI_10025995	0.179657	0.0434671	807.168	0.187063	0.0212272	836.918	0.308784	1.77339e-05	791.015	0.225168	E3 ubiquitin- ligase MYLIP	0.6525	response to external stimulus	GO:0008270;GO:0061630;GO:0055098;GO:0000209;GO:0007399;GO:0045732;GO:0042632;GO:0042787;GO:0031648;GO:0032803;GO:0005856;GO:0010989;GO:0006928;GO:0016020;GO:0005829;GO:0008092;GO:0070735;GO:0098586;GO:0016567
CGI_10024137	-0.135812	0.0490367	1731.05	-0.14356	0.0423969	1804.06	-0.16665	0.00976647	1787.39	-0.148674	E3 ubiquitin- ligase SMURF2	0.8205	response to external stimulus	GO:0005634;GO:0004842;GO:0030579;GO:0042802;GO:0000151;GO:0046332;GO:0005737;GO:0007179;GO:0016874;GO:0030512;GO:0042787;GO:0098586;GO:0016567
CGI_10014473	-0.228672	1.03691e-07	9634.22	-0.108158	0.00207776	9578	-0.193047	1.02036e-05	9706.45	-0.176626	ATP-dependent RNA helicase DDX5 [Aplysia californica]	0.8625	response to external stimulus	GO:0003676;GO:0005524;GO:0008152;GO:0004386;GO:0039528;GO:0098586;GO:0050776
CGI_10017504	-0.2108	0.00235588	614.979	-0.209033	0.00512244	639.004	-0.205891	0.0199372	626.49	-0.208575	E3 ubiquitin- ligase RNF43	0.638	response to external stimulus	GO:0008270;GO:0016021;GO:0098586;GO:0016567
CGI_10007048	-0.249297	0.00175671	830.19	-0.181198	0.024896	841.061	-0.208795	0.0044302	834.652	-0.213097	poly [ADP-ribose] polymerase 14-like	0.5545	response to external stimulus	GO:0098586
CGI_10022925	-0.277762	0.000205315	1296.23	-0.186803	0.0216769	1301.48	-0.268509	0.00296749	1318.56	-0.244358	Tripartite motif-containing 2	0.639	response to external stimulus	GO:0009607;GO:0016021;GO:0016567
CGI_10028511	-0.26939	0.000236936	1655.18	-0.341269	6.83943e-06	1768.98	-0.279074	0.000864612	1696.83	-0.296578	sucrase- intestinal	0.6775	response to external stimulus	GO:0061298;GO:0014068;GO:0038033;GO:0045908;GO:0030031;GO:0045907;GO:0045743;GO:0048514;GO:0005576;GO:0006468;GO:0060664;GO:0060445;GO:0001892;GO:0003104;GO:0048661;GO:0006935;GO:0050730;GO:0072262;GO:0005903;GO:0060947;GO:0010557;GO:0014911;GO:0030246;GO:0045935;GO:0038001;GO:0042462;GO:0006355;GO:0090184;GO:0043410;GO:0004553;GO:0021782;GO:0045977;GO:0005102;GO:0005975;GO:0007416;GO:0031328;GO:…
CGI_10018945	-0.322013	0.00192274	397.666	-0.289652	0.00120491	407.91	-0.345794	0.000165472	409.708	-0.319153	E3 ubiquitin- ligase AMFR	0.578	response to external stimulus	GO:0005789;GO:0004842;GO:0005515;GO:0046872;GO:0016021;GO:0016881;GO:0016567;GO:0098586;GO:0016567
CGI_10016209	-0.244802	0.000798447	1479.38	-0.612577	6.63632e-12	1783.14	-0.420389	7.88412e-08	1617.11	-0.425923	Poly [ADP-ribose] polymerase 14	0.575	response to external stimulus	GO:0000166;GO:0003676;GO:0008152;GO:0003950;GO:0098586
CGI_10020727	-0.380998	0.0180512	99.5566	-0.454136	0.000334468	106.118	-0.486342	0.00014598	105.848	-0.440492	ATP-dependent RNA helicase DDX54	0.864	response to external stimulus	GO:0005524;GO:0003714;GO:0016021;GO:0010501;GO:0006396;GO:0030331;GO:0005730;GO:1903507;GO:0004004;GO:0044822;GO:0039528;GO:0098586;GO:0050776
CGI_10023023	-0.518316	0.000276909	1426.39	-0.320194	0.0267283	1367.22	-0.572297	1.5671e-06	1487.57	-0.470269	E3 ubiquitin- ligase HERC2	0.743	response to external stimulus	GO:0004842;GO:0005509;GO:0016021;GO:0007156;GO:0016567;GO:0098586;GO:0016567
CGI_10010983	-0.711875	2.37748e-23	535.11	-0.563508	1.49147e-10	522.441	-0.200077	0.0230184	444.323	-0.49182	poly [ADP-ribose] polymerase 12-like	0.7075	response to external stimulus	GO:0008152;GO:0003950;GO:0098586
CGI_10000029	-0.355295	0.0119581	130.557	-0.560357	3.95975e-05	147.625	-0.684676	2.87747e-08	152.896	-0.533443	DNA damage-regulated autophagy modulator 1-like	0.706	response to external stimulus	GO:0010506;GO:0016021;GO:0007601;GO:0010506;GO:0098586
CGI_10027022	-0.39266	0.000233882	27511.9	-0.737366	1.55984e-11	33059.3	-0.474069	3.6145e-12	28985.6	-0.534698	cathepsin B	0.7715	response to external stimulus	GO:0005615;GO:0005515;GO:0044707;GO:0050790;GO:0016021;GO:0004197;GO:0031982;GO:0051704;GO:0051603;GO:0009888;GO:0005764;GO:0044767
CGI_10004866	-0.360545	0.00193089	727.948	-0.534749	0.000219932	813.777	-0.790178	5.87664e-16	889.961	-0.561824	cytolysin Src-1-like [Salmo salar]	0.516	response to external stimulus	GO:0015267;GO:0006812;GO:0055085;GO:0052331;GO:0046930;GO:0046931
CGI_10006624	-0.823143	4.64469e-11	167.776	-0.857358	1.02684e-14	176.62	-0.556047	1.47296e-07	151.995	-0.745516	Proline-rich transmembrane 1	0.7005	response to external stimulus	GO:0003677;GO:0009607;GO:0016021
CGI_10024571	-0.492502	0.0330802	127.177	-0.453735	0.000873506	129.211	-1.29245	2.02495e-20	186.82	-0.74623	poly [ADP-ribose] polymerase 15-like [Crassostrea gigas]	0.6215	response to external stimulus	GO:0008152;GO:0003950;GO:0098586
CGI_10010234	-1.01937	1.00566e-05	849.435	-0.607831	0.000406809	717.591	-1.05526	4.10937e-10	867.63	-0.894153	ATP-dependent RNA helicase DDX24	0.7705	response to external stimulus	GO:0003676;GO:0005524;GO:0010501;GO:0008146;GO:0004004;GO:0039528;GO:0098586;GO:0050776
CGI_10006767	-1.15018	8.04181e-30	185.57	-0.707671	1.45216e-06	158.168	-0.848984	4.01614e-18	164.359	-0.90228	GTP cyclohydrolase partial	0.8585	response to external stimulus	GO:0042416;GO:0008270;GO:0042803;GO:0034341;GO:0051260;GO:0043234;GO:0046654;GO:0005654;GO:0005525;GO:0050884;GO:0031965;GO:0006729;GO:0051000;GO:0003934;GO:0014916;GO:0005829;GO:0031410;GO:0032496;GO:2000121;GO:0034612
CGI_10018622	-0.998843	1.02169e-16	237.534	-1.48882	2.86165e-29	316.586	-1.13937	2.29783e-27	258.938	-1.20901	probable E3 ubiquitin- ligase MID2	0.5115	response to external stimulus	GO:0016021;GO:0098586;GO:0016567
CGI_10006476	-1.8439	2.46985e-53	1500.36	-1.69425	2.41195e-36	1441.62	-0.596085	1.3614e-05	826.115	-1.37808	E3 ubiquitin- ligase RNF213-like	0.6595	response to external stimulus	GO:0016887;GO:0004842;GO:0043167;GO:0016567;GO:0098586;GO:0016567
CGI_10001651	-1.81436	2.33851e-19	39.1799	-0.965357	1.92066e-05	25.8725	-1.43734	6.91262e-11	32.527	-1.40569	Poly [ADP-ribose] polymerase 14	0.702	response to external stimulus	GO:0016021;GO:0098586
CGI_10001069	-1.5112	3.01452e-13	83.8301	-1.60648	8.74035e-20	90.4976	-1.59418	5.57842e-19	88.345	-1.57062	Poly [ADP-ribose] polymerase 14	0.813	response to external stimulus	GO:0000166;GO:0003676;GO:0047961;GO:0005739;GO:0008152;GO:0016021;GO:0003950;GO:0098586
CGI_10006478	-2.1187	1.55557e-36	105.729	-2.24751	3.86479e-31	120.648	-1.01771	1.28638e-07	59.5346	-1.79464	E3 ubiquitin- ligase RNF213-like	0.544	response to external stimulus	GO:0016887;GO:0004842;GO:0016567;GO:0098586;GO:0016567
CGI_10016060	-2.32003	7.46307e-28	104.364	-1.8927	7.33996e-21	82.466	-2.11564	1.80494e-21	93.9326	-2.10946	poly [ADP-ribose] polymerase 14-like	0.667	response to external stimulus	GO:0008152;GO:0003950;GO:0098586
CGI_10016208	-2.17153	1.05796e-48	98.983	-2.10318	1.26411e-30	100.802	-2.25317	8.38719e-54	105.662	-2.17596	poly [ADP-ribose] polymerase 14-like	0.7205	response to external stimulus	GO:0016757;GO:0097159;GO:1901363;GO:0098586
CGI_10022810	0.545805	0.000206411	589.687	0.95205	3.1717e-09	550.088	0.921176	3.37337e-14	546.17	0.806344	NFX1-type zinc finger-containing 1	0.58	response to external stimulus ; defense response ; response to stress	GO:0005634;GO:0003700;GO:0008270;GO:0006355;GO:0006952;GO:0006954;GO:0098586
CGI_10023724	0.167516	0.0176453	6506.83	0.203284	0.00243304	6682.66	0.147216	0.0370683	6686.95	0.172672	high mobility group B1-like	0.821	response to external stimulus ; defense response ; response to stress	GO:0005634;GO:0003677;GO:0045595;GO:0032440;GO:0007283;GO:0006355;GO:0055114;GO:0006952;GO:0039528
CGI_10025622	0.363092	2.2012e-06	1751.84	0.404677	1.29769e-08	1797.66	0.374369	2.07449e-06	1781.91	0.380713	Ras-related C3 botulinum toxin substrate 1	0.934	response to external stimulus ; defense response ; response to stressactin polymerization or depolymerization	GO:0007411;GO:0021831;GO:0000139;GO:0021799;GO:0006886;GO:0005789;GO:0006913;GO:0006954;GO:0045453;GO:0003924;GO:0005829;GO:0031996;GO:0030027;GO:0030742;GO:0010592;GO:0019901;GO:0042826;GO:0007186;GO:0007264;GO:0090103;GO:0002093;GO:0090023;GO:0008152;GO:0003382;GO:0043552;GO:1900026;GO:0005884;GO:0006972;GO:0045216;GO:0031901;GO:0005634;GO:0048010;GO:0051894;GO:0097178;GO:0042470;GO:0048532;GO:…
CGI_10006029	2.39017	2.60411e-13	15.3174	0.967854	0.00019625	20.7928	1.10588	4.96491e-05	19.7298	1.48797	histone acetyltransferase p300-like isoform X2	0.8915	response to external stimulusresponse to stress	GO:0008283;GO:0016604;GO:1900034;GO:1901224;GO:0044255;GO:0061418;GO:0001105;GO:0045944;GO:1904837;GO:0043426;GO:0006367;GO:0001102;GO:0042975;GO:0002223;GO:0008589;GO:0042733;GO:0000122;GO:0005667;GO:0001078;GO:0002039;GO:0018076;GO:0016032;GO:0034644;GO:0016573;GO:0008270;GO:0060355;GO:1900087;GO:0032481;GO:0000987;GO:0042981;GO:0003682;GO:0003684;GO:0004871;GO:0000123;GO:0004402;GO:0000790;GO:…
CGI_10006027	0.725533	7.5333e-08	218.7	0.647556	4.36467e-10	232.372	1.53102	1.87273e-18	186.236	0.968036	CREB-binding -like isoform X2	0.8175	response to external stimulusresponse to stress	GO:0007050;GO:0016605;GO:0006284;GO:0016925;GO:0008340;GO:0006289;GO:0006366;GO:0042771;GO:0001228;GO:0000733;GO:0048512;GO:0043621;GO:0097252;GO:0002039;GO:1902749;GO:0005669;GO:0005507;GO:0046982;GO:0030308;GO:0051087;GO:0043153;GO:0005829;GO:0016573;GO:0070245;GO:0071456;GO:0010332;GO:2001244;GO:0051721;GO:0008270;GO:0035035;GO:0046827;GO:1900740;GO:1901796;GO:0007265;GO:0042149;GO:0001046;GO:…
CGI_10006412	-1.58437	4.08224e-43	1242.75	-1.15681	7.08616e-26	1036.25	-1.16697	1.60836e-23	1023.95	-1.30272	spliceosome RNA helicase DDX39B isoform X1	0.8355	response to external stimulusresponse to stress	GO:0016607;GO:0005681;GO:0000346;GO:0006974;GO:0005688;GO:0043008;GO:0000245;GO:0005687;GO:0004004;GO:0044822;GO:0005524;GO:0017070;GO:0005737;GO:0046784;GO:0010501;GO:2000002;GO:0032786;GO:0030621
CGI_10021345	0.465148	0.00662458	413.148	0.392707	0.0219044	438.847	0.534524	0.00254597	412.956	0.464126	Ras-related C3 botulinum toxin substrate 1	0.9215	response to external stimulusresponse to stressactin polymerization or depolymerization	GO:0007411;GO:0021831;GO:0000139;GO:0021799;GO:0006886;GO:0006913;GO:0045453;GO:0003924;GO:0005829;GO:0031996;GO:0030027;GO:0030742;GO:0010592;GO:0019901;GO:0042826;GO:0007186;GO:0007264;GO:0090103;GO:0002093;GO:0090023;GO:0008152;GO:0003382;GO:0043552;GO:1900026;GO:0005884;GO:1904948;GO:0006972;GO:0045216;GO:0031901;GO:0005634;GO:0051894;GO:0097178;GO:0048532;GO:0051496;GO:0051932;GO:0017137;GO:…
CGI_10000758	3.9184	1.57126e-52	58.0008	4.89782	1.01309e-57	58.4559	4.98905	4.20327e-56	57.2711	4.60176	Heat shock 70 kDa 12B	0.662	response to stress	GO:0016021;GO:0006950
CGI_10003357	3.40926	1.19052e-19	14.1939	3.82531	3.83375e-22	14.4856	3.92959	1.85932e-22	14.1243	3.72139	Heat shock 70 kDa 12B	0.7085	response to stress	GO:0016021;GO:0006950
CGI_10000765	2.67757	4.69572e-16	15.0496	3.56655	2.43774e-21	14.5613	3.87776	3.59494e-23	14.1	3.37396	Zinc finger and SCAN domain-containing 22	0.63	response to stress	GO:0090305;GO:0004519;GO:0006298
CGI_10018488	2.10548	3.57898e-07	6.07275	2.62216	1.05071e-09	5.92427	2.86123	7.67094e-11	5.64819	2.52963	Heat shock factor 5	0.6895	response to stress	GO:0005634;GO:0003700;GO:0006355;GO:0043565;GO:0006950
CGI_10014932	1.876	6.5384e-29	238.935	1.76711	3.2082e-30	253.158	1.34048	1.54387e-19	268.422	1.6612	Heat shock 70 kDa 12B	0.6215	response to stress	GO:0006950
CGI_10009386	2.22409	3.62523e-11	27.567	1.39485	3.61326e-05	32.7741	0.994954	0.00174387	35.4997	1.53797	Heat shock 70 kDa 12B	0.6435	response to stress	GO:0006950
CGI_10001646	3.05376	4.64623e-91	216.194	0.681427	1.07453e-07	326.833	0.6874	9.68362e-09	320.638	1.4742	heat shock 70 kDa 12A-like	0.677	response to stress	GO:0006950
CGI_10026933	1.26952	5.05727e-19	2924.03	1.8779	2.06223e-36	2729.51	0.960754	3.18747e-09	3193.89	1.36939	myeloperoxidase-like [Crassostrea gigas]	0.6945	response to stress	GO:0004601;GO:0006979;GO:0016021;GO:0098869;GO:0055114;GO:0020037
CGI_10015709	1.33385	1.51831e-19	86.7946	1.71508	7.87936e-30	84.205	0.791614	9.37521e-10	100.622	1.28018	heat shock 70 kDa 12A-like	0.711	response to stress	GO:0016021;GO:0006950
CGI_10010665	1.25466	1.75625e-13	296.116	0.391052	0.0277464	384.414	1.63662	6.0326e-24	281.543	1.09411	glutathione S-transferase omega-1-like	0.698	response to stress	GO:0005737;GO:0008152;GO:0004364;GO:0006979
CGI_10014211	0.450872	0.021576	76.5549	1.39615	2.93618e-14	62.9391	1.32021	1.99564e-11	62.5672	1.05574	glutathione S-transferase mu	0.8355	response to stress	GO:0008152;GO:0004364;GO:0006979
CGI_10019898	0.935038	5.40913e-19	718.823	0.698474	1.56609e-07	792.443	1.06766	8.15854e-18	711.02	0.90039	sacsin-like	0.544	response to stress	GO:0006950
CGI_10019897	0.731077	7.18518e-10	560.878	0.75558	8.06685e-10	579.422	1.11293	3.77343e-26	522.758	0.866529	sacsin-like	0.502	response to stress	GO:0006950
CGI_10000837	0.512576	0.0181776	40.0819	0.783237	0.0013956	38.5277	0.892807	2.33669e-05	36.9116	0.72954	sacsin-like [Acropora digitifera]	0.856	response to stress	GO:0050750;GO:0006950
CGI_10004348	0.678516	3.03386e-33	2755.74	0.936782	9.01173e-22	2677.94	0.5607	2.7793e-10	2903.76	0.725333	Heat shock 70 kDa 12B	0.762	response to stress	GO:0005524;GO:0006950
CGI_10003517	0.248494	0.0186951	394.61	0.848413	2.55586e-18	345.801	0.810284	4.99213e-18	343.207	0.635731	heat shock 70 kDa 12A-like [Crassostrea gigas]	0.582	response to stress	GO:0006950
CGI_10019470	0.666592	3.37359e-16	898.034	0.360368	0.000203425	1018.73	0.828541	5.0471e-18	878.464	0.6185	ruvB-like 2	0.9525	response to stress	GO:0035066;GO:0043967;GO:0006281;GO:0060420;GO:0035267;GO:0043968;GO:0000979;GO:0000812;GO:0003351;GO:0044458;GO:0000980;GO:0005524;GO:0007507;GO:0006338;GO:0071392;GO:0070062;GO:0030529;GO:0045892;GO:0048565;GO:0032508;GO:0001094;GO:0070286;GO:0034644;GO:0071733;GO:0031011;GO:0071899;GO:0071339;GO:0031490;GO:0042803;GO:0006351;GO:0006310;GO:0043531;GO:0003684;GO:0043141;GO:0005737;GO:0005719;GO:…
CGI_10004951	0.447004	0.0366243	218.698	0.502097	0.0154143	223.487	0.771451	0.000222887	203.375	0.573517	heat shock 70 kDa 12A-like	0.728	response to stress	GO:0006950
CGI_10018333	0.478292	0.00659326	51.2382	0.702656	0.000408434	49.9203	0.47639	0.00668782	52.4775	0.552446	Heat shock 70 kDa 12A	0.9133	response to stress	GO:0006950
CGI_10011414	0.459641	1.75059e-07	497.933	0.63989	5.21949e-13	491.712	0.453564	1.59635e-07	509.415	0.517698	heat shock 70 kDa 12A-like [Crassostrea gigas]	0.6915	response to stress	GO:0006950
CGI_10012329	0.471521	0.00347926	253.899	0.37118	0.000897455	272.306	0.658266	4.81701e-08	246.174	0.500322	DNA polymerase alpha catalytic subunit	0.7405	response to stress	GO:0000166;GO:0003677;GO:0008408;GO:0006270;GO:0090305;GO:0003887;GO:0005658;GO:0006273;GO:0006272;GO:0071897;GO:0006303;GO:0001882
CGI_10009157	0.43348	0.0040009	123.596	0.488373	0.000273574	126.491	0.567501	3.84487e-05	121.439	0.496451	growth arrest and DNA damage-inducible GADD45 alpha	0.561	response to stress	GO:0005634;GO:0051726;GO:0006950;GO:0043065;GO:0042981
CGI_10028786	0.467878	3.56202e-08	283.502	0.334438	7.0725e-05	306.727	0.587614	1.21031e-11	279.819	0.46331	DNA ligase 1	0.8625	response to stress	GO:1903461;GO:0006284;GO:0006310;GO:0005794;GO:0005654;GO:0051103;GO:0051301;GO:0003677;GO:0005524;GO:0003910;GO:0046872;GO:0005739;GO:0071897
CGI_10021337	0.306554	0.0146143	188.184	0.293242	0.011335	196.277	0.752286	3.79301e-09	168.899	0.450694	Replication A 14 kDa subunit	0.687	response to stress	GO:0005634;GO:0003677;GO:0006281;GO:0006260;GO:0006310
CGI_10009436	0.71945	1.10594e-07	155.718	0.264947	0.0323446	184.906	0.361513	0.00237086	176.274	0.448637	tyrosyl-DNA phosphodiesterase 1-like	0.738	response to stress	GO:0000012;GO:0005634;GO:0005515;GO:0005737;GO:0003690;GO:0017005;GO:0005886;GO:0003697;GO:0006302
CGI_10020408	0.238642	0.0038665	354.541	0.523299	1.48706e-07	337.377	0.575473	6.89568e-15	326.916	0.445805	DNA polymerase beta	0.7615	response to stress	GO:0065007;GO:0005634;GO:0003677;GO:0003887;GO:0005515;GO:0006284;GO:0006915;GO:0071897;GO:0048534;GO:0016445;GO:0005874
CGI_10005268	0.281507	0.00134197	981.993	0.280958	0.000774972	1021.01	0.768382	9.61613e-24	872.243	0.443616	DNA repair XRCC1	0.6875	response to stress	GO:0000012;GO:0005634;GO:0003684
CGI_10008312	0.361395	0.00109432	766.492	0.446877	2.76123e-08	777.063	0.518724	4.04787e-06	746.952	0.442332	heat shock 70 kDa 12A-like [Crassostrea gigas]	0.647	response to stress	GO:0016021;GO:0006950
CGI_10022078	0.489421	3.61202e-08	435.72	0.201826	0.00763599	495.193	0.603279	1.96033e-11	431.088	0.431509	heat shock 70 kDa 12B-like [Crassostrea gigas]	0.6345	response to stress	GO:0006950
CGI_10000124	0.290159	0.0191745	490.43	0.763459	1.2224e-13	445.052	0.240132	0.0481204	508.893	0.43125	glutathione S-transferase class mu	0.855	response to stress	GO:0008152;GO:0004364;GO:0006979
CGI_10021574	0.332296	0.000265738	227.678	0.300612	0.00023758	238.724	0.580366	6.67404e-10	216.089	0.404425	Serine threonine- kinase ATR	0.6695	response to stress	GO:0005634;GO:0044763;GO:0005488;GO:0016773;GO:0006468;GO:0006974;GO:0016301
CGI_10009060	0.321395	0.00138773	202.756	0.516462	7.79042e-07	198.789	0.364492	8.07081e-05	204.545	0.400783	carbonic anhydrase 2-like isoform X3 [Crassostrea gigas]	0.671	response to stress	GO:0042539;GO:0015670;GO:0097369;GO:0004089;GO:0071466;GO:0006885
CGI_10005614	0.400384	4.2496e-16	2352.99	0.399813	4.75118e-22	2446	0.317062	2.26386e-10	2464.02	0.37242	heat shock 70 kDa 12A-like	0.663	response to stress	GO:0006950
CGI_10007398	0.382802	3.36404e-05	219.749	0.257705	0.00740032	237.402	0.433932	6.19919e-07	221.012	0.358146	dnaJ homolog subfamily C member 16-like	0.536	response to stress	GO:0006950
CGI_10028647	0.449011	5.52338e-14	1194.86	0.282979	3.23294e-05	1305.58	0.299034	4.01816e-10	1276.9	0.343675	proteasome activator complex subunit 4 isoform X2	0.687	response to stress	GO:0005634;GO:0005737;GO:0000502;GO:0044763;GO:0006259;GO:0006974;GO:0044710
CGI_10005458	0.303952	0.00675673	429.875	0.310675	0.00387267	445.654	0.416184	8.54126e-05	424.025	0.343604	Sterol regulatory element-binding cleavage-activating	0.578	response to stress	GO:0005789;GO:0032933;GO:0015485;GO:0016021;GO:0008203;GO:0000139
CGI_10007960	0.226866	0.0371273	1140.98	0.536767	8.13652e-09	1079.47	0.239883	0.0161726	1160.34	0.334505	heat shock 70 kDa 12B-like [Crassostrea gigas]	0.6705	response to stress	GO:0005524;GO:0006950
CGI_10006857	0.326873	4.39276e-10	797.688	0.450021	3.39429e-18	799.027	0.202149	0.00115979	846.758	0.326348	heat shock 70 kDa 12A-like	0.741	response to stress	GO:0006950
CGI_10020859	0.247002	0.0199603	212.654	0.209269	0.02952	223.78	0.494987	1.18976e-06	201.297	0.317086	serine threonine- kinase atr-like	0.808	response to stress	GO:0006281;GO:0043517;GO:0016605;GO:0090399;GO:1904884;GO:0046777;GO:0005794;GO:0008156;GO:0004674;GO:0032407;GO:0097694;GO:0001741;GO:0003677;GO:0005524;GO:0000077;GO:0032405;GO:0071480;GO:0043393;GO:0070198;GO:0032212;GO:0034644;GO:0018105
CGI_10024296	0.295812	0.00294926	867.413	0.297855	0.00625659	900.922	0.219112	0.0347784	907.614	0.270926	heat shock 70 kDa 12A-like	0.718	response to stress	GO:0016021;GO:0006950
CGI_10007774	0.183435	0.0282614	1198.74	0.14598	0.0201471	1261.21	0.37285	1.15633e-07	1153.28	0.234088	Ubiquitin-like modifier-activating enzyme 1	0.7975	response to stress	GO:0006464;GO:0006974;GO:0005765;GO:0044822;GO:0006511;GO:0000792;GO:0005634;GO:0004842;GO:0005524;GO:0030867;GO:0070062;GO:0005515;GO:0007409;GO:0005739;GO:0005829;GO:0004839;GO:0010008;GO:0030057
CGI_10014861	0.182889	0.00242258	1422.36	0.152801	0.00910268	1492.18	0.290041	9.42234e-06	1402.93	0.208577	Ubiquitin-conjugating enzyme E2 N	0.9545	response to stress	GO:0061630;GO:0033182;GO:0061631;GO:0038095;GO:0043123;GO:0005730;GO:0006303;GO:0051092;GO:0006301;GO:0005654;GO:0002223;GO:0005524;GO:0070062;GO:0051443;GO:0043130;GO:0070423;GO:0005829;GO:0031058;GO:0016574;GO:0050852;GO:0045739;GO:0000729;GO:0031372;GO:0035370;GO:0000724;GO:0044822;GO:0006511;GO:0031625;GO:0000151;GO:0070534;GO:0070911
CGI_10020647	0.198348	0.00034689	1100.54	0.148109	0.0267857	1162.2	0.220738	0.00143325	1115.04	0.189065	heat shock 70 kDa 12B-like [Crassostrea gigas]	0.733	response to stress	GO:0006950
CGI_10017773	-0.247533	0.00543963	4006.94	-0.146459	0.0221172	4008.93	-0.150892	0.0315943	3945.18	-0.181628	Leucine-zipper-like transcriptional regulator 1	0.8315	response to stress	GO:0003677;GO:0005524;GO:0006281;GO:0008094;GO:0008270
CGI_10023920	-0.364937	1.98984e-07	505.633	-0.416095	5.1278e-11	536.171	-0.384682	9.02842e-09	520.5	-0.388571	Spermatogenesis-associated 18	0.7295	response to stress	GO:0033554;GO:0005741
CGI_10014683	-0.492835	6.12808e-09	235.802	-0.427652	7.21147e-06	239.018	-0.438017	5.47419e-05	235.626	-0.452835	universal stress A [Crassostrea gigas]	0.677	response to stress	GO:0006950
CGI_10020574	-0.407988	0.015258	279.906	-0.436036	0.00850247	294.121	-0.536366	0.000610767	301.217	-0.46013	Mitogen-activated kinase 7	0.8415	response to stress	GO:0005524;GO:0000165;GO:0005737;GO:0043409;GO:0071363;GO:0004707;GO:0033554;GO:0022603;GO:0045944;GO:2001234;GO:0005654;GO:2000026
CGI_10022635	-0.614819	1.86995e-06	96.2972	-0.438061	0.000641338	92.9281	-0.501038	0.000455631	93.6356	-0.517973	universal stress A	0.6725	response to stress	GO:0006950
CGI_10002594	-0.375561	0.00928997	95.8679	-0.612282	0.00207858	110.574	-0.586035	0.00194123	107.177	-0.524626	heat shock 70	0.9395	response to stress	GO:0005524;GO:0006950
CGI_10017778	-0.336236	0.0439226	1261.78	-0.798858	1.40162e-07	1597.53	-0.647878	1.26563e-06	1464.52	-0.594324	Dipeptidase 1	0.7025	response to stress	GO:0004601;GO:0006979;GO:0046872;GO:0016805;GO:0006508;GO:0016021;GO:0098869;GO:0055114;GO:0031225;GO:0008237;GO:0020037
CGI_10002794	-0.419501	0.0262356	100.256	-0.676949	0.000355307	116.54	-0.688341	7.58969e-07	114.463	-0.59493	Heat shock 70 kDa 12B	0.7115	response to stress	GO:0016020;GO:0006950
CGI_10019249	-0.30969	0.00809384	381.529	-0.252734	0.0392822	387.873	-1.30722	4.42975e-25	611.234	-0.623214	serine- kinase ATM-like	0.5915	response to stress	GO:0000077;GO:0006281;GO:0050794;GO:0090399;GO:0007275;GO:0000723;GO:0016572;GO:0004674;GO:0005488;GO:0010212
CGI_10017388	-0.708941	0.000429752	34.5743	-0.78228	8.18673e-05	37.0902	-0.441928	0.0377975	31.314	-0.644383	ATP-dependent DNA helicase Q4-like	0.677	response to stress	GO:0006281;GO:0035563;GO:0006260;GO:0043167;GO:0006310;GO:0008026;GO:0003682;GO:0000785;GO:0003676;GO:0005634;GO:0003678;GO:0005515;GO:0051276
CGI_10003354	-0.567879	0.00153522	644.135	-0.998255	3.83737e-10	812.815	-0.524258	0.000615944	643.529	-0.696797	Catalase	0.893	response to stress	GO:0006979;GO:0046872;GO:0004096;GO:0098869;GO:0055114;GO:0020037;GO:0042744
CGI_10006718	-0.432437	0.0359711	35.0382	-0.962424	1.1374e-06	46.3723	-0.698772	0.000237067	40.0399	-0.697877	glutathione S-transferase	0.621	response to stress	GO:0008152;GO:0016740;GO:0006979
CGI_10007359	-0.493716	0.000977745	94.2318	-0.463856	0.000861538	96.5928	-1.36877	2.05497e-28	144.11	-0.775446	dnaJ homolog subfamily C member 28-like	0.7035	response to stress	GO:0016043;GO:0048193;GO:0006950
CGI_10013528	-1.18164	1.36998e-34	949.194	-0.414827	4.5624e-05	700.745	-0.99097	2.73966e-16	887.178	-0.862479	heat shock 70 kDa 12A-like [Crassostrea gigas]	0.804	response to stress	GO:0005524;GO:0006950
CGI_10019210	-0.819427	0.000961639	126.648	-1.26128	2.85928e-15	160.188	-0.62719	0.00103846	116.882	-0.902632	transformation transcription domain-associated -like	0.8545	response to stress	GO:0005634;GO:0006281;GO:0016021;GO:0016310;GO:0016773;GO:0016301
CGI_10004819	-0.892962	0.00131444	47.0949	-0.997978	0.000120939	51.2441	-0.956095	7.6317e-05	48.9123	-0.949012	Heat shock 70 kDa 12B	0.7145	response to stress	GO:0006950
CGI_10003082	-1.09262	3.39768e-14	307.362	-0.574719	3.65362e-08	250.879	-1.18528	1.11671e-31	325.616	-0.950872	uracil-DNA glycosylase	0.743	response to stress	GO:0005634;GO:0004844;GO:0006284;GO:0005739
CGI_10012767	-0.958509	5.16979e-08	75.7092	-1.36095	4.56582e-19	95.8809	-0.66665	3.98931e-05	67.4214	-0.995369	heat shock 70 kDa 12A-like	0.644	response to stress	GO:0006950
CGI_10005319	-1.17498	6.57602e-05	14.4823	-1.16516	0.00192088	15.8667	-0.855019	0.0187017	12.7588	-1.06505	heat-shock Hsp20	0.868	response to stress	GO:0006950
CGI_10004267	-1.25102	3.75534e-40	197.665	-0.640234	1.0253e-05	155.695	-1.38152	2.35666e-37	216.236	-1.09092	Heat shock 70 kDa 12A	0.725	response to stress	GO:0006950
CGI_10012768	-1.51816	5.5576e-12	29.6372	-1.1449	5.83131e-06	25.5294	-0.871812	0.00156871	21.8539	-1.17829	Heat shock 70 kDa 12B	0.7045	response to stress	GO:0006950
CGI_10013527	-1.71237	2.2054e-140	724.219	-0.879429	1.03622e-10	501.24	-1.34825	7.38056e-73	612.353	-1.31335	heat shock 70 kDa 12A-like [Crassostrea gigas]	0.815	response to stress	GO:0005524;GO:0006950
CGI_10000914	-0.556148	0.0395176	21.0015	-1.04508	1.39455e-05	27.5856	-2.74726	1.25125e-34	74.1866	-1.44949	heat shock 70 kDa 12A-like [Crassostrea gigas]	0.7205	response to stress	GO:0006950
CGI_10011979	-1.90293	1.29763e-41	100.986	-1.29718	3.78988e-15	75.9911	-1.97479	4.37437e-45	107.049	-1.72497	mutS homolog 4	0.741	response to stress	GO:0005524;GO:0007131;GO:0045143;GO:0032300;GO:0007276;GO:0000710;GO:0030983;GO:0003684;GO:0000795
CGI_10002287	-2.38316	7.4724e-77	271.156	-1.84493	8.41697e-35	207.973	-1.52414	4.86236e-30	170.166	-1.91741	Heat shock 70 kDa 12B	0.8375	response to stress	GO:0005524;GO:0006950
CGI_10003507	8.73554	0	3586.18	7.97592	0	3733.13	0.991027	6.83986e-87	5489.12	5.90083	ribosomal S30	0.8485		GO:0003735;GO:0022627;GO:0006412
CGI_10011460	5.32889	1.13255e-47	51.6823	5.49679	2.66878e-49	53.706	5.28976	6.98088e-48	52.9464	5.37181	Chitin synthase partial	0.652		GO:0016758;GO:0008152;GO:0016021
CGI_10001570	5.07423	3.76486e-42	41.2416	5.24036	1.0172e-43	42.8509	5.12227	1.53783e-42	42.1888	5.14562	hypothetical protein CGI_10001570	0.665		unknown
CGI_10020499	5.43647	9.30168e-101	216.503	4.85023	2.66634e-100	227.569	4.81166	1.94873e-82	223.408	5.03278	hypothetical protein CGI_10020499	0.8533		unknown
CGI_10005015	1.00301	1.29452e-05	230.67	6.97732	2.56057e-95	162.525	6.95514	2.49793e-93	159.693	4.97849	ankyrin repeat domain-containing 17-like	0.654		unknown
CGI_10017946	3.8735	1.09588e-65	85.2756	4.62047	7.91416e-73	86.3687	5.29346	5.06141e-71	83.5775	4.59581	neuronal acetylcholine receptor subunit alpha-3-like	0.6505		GO:0034220;GO:0016021;GO:0005230
CGI_10028280	4.48533	2.46714e-32	39.691	3.35537	2.63961e-24	43.3966	3.81543	1.25602e-27	41.6413	3.88538	Cytochrome P450 1A1	0.677		GO:0005506;GO:0016705;GO:0055114;GO:0020037
CGI_10009851	3.73576	7.60751e-21	83.938	3.81452	1.89944e-29	88.7896	3.82913	1.14261e-22	86.0721	3.79314	transcriptional repressor scratch 1-like	0.736		GO:0003676;GO:0046872
CGI_10023810	2.25575	6.57768e-07	313.53	7.60236	1.59346e-126	325.167	1.5086	3.82674e-10	422.685	3.7889	hypothetical protein CGI_10023810	0.7117		unknown
CGI_10021026	3.5119	6.1323e-28	73.852	4.44084	3.71235e-39	74.3375	3.38639	5.28183e-29	76.2922	3.77971	cholecystokinin receptor-like [Crassostrea gigas]	0.541		GO:0004930;GO:0007186;GO:0016021
CGI_10022181	3.98339	7.05016e-154	227.503	3.23615	5.59792e-60	244.436	3.5471	3.54397e-118	236.982	3.58888	hypothetical protein CGI_10022181	1		unknown
CGI_10002875	6.28613	6.54261e-106	150.638	1.70675	3.28481e-22	201.293	2.7562	1.05198e-49	173.641	3.58303	Breast cancer type 1 susceptibility	0.7035		unknown
CGI_10001706	3.02087	2.61948e-46	178.556	4.11036	1.11659e-73	175.381	3.56671	4.20315e-62	176.478	3.56598	Calcium and integrin-binding 1	0.5575		unknown
CGI_10025147	3.66511	1.50715e-38	38.238	4.7091	2.45305e-44	38.2556	2.26321	1.22073e-24	44.0529	3.54581	Multiple epidermal growth factor-like domains 11	0.78		unknown
CGI_10004191	2.76233	5.64002e-15	23.8953	4.10913	3.65379e-26	23.1213	3.6091	1.54226e-22	23.2206	3.49352	GTPase IMAP family member 4-like	0.7285		GO:0005525
CGI_10024025	5.06994	1.81406e-54	49.6835	2.02065	9.04969e-18	62.5203	3.16459	4.74278e-38	54.9801	3.41839	Nucleosome-remodeling factor subunit BPTF	0.6815		GO:0008270
CGI_10000535	4.29628	2.79711e-148	167.044	1.85915	5.59752e-78	211.03	4.08777	8.87529e-147	171.815	3.4144	muscle M-line assembly unc-89-like	0.616		unknown
CGI_10007286	2.60172	5.19965e-29	40.9017	2.85594	2.57444e-32	41.6754	4.13445	1.88657e-41	37.8227	3.19737	c-binding -like	0.6665		unknown
CGI_10017285	3.23818	3.03288e-17	10.6822	2.95741	3.6126e-15	11.369	3.0452	5.22114e-16	11.1589	3.08026	hypothetical protein CGI_10017285	0.6414		unknown
CGI_10010050	2.97258	7.34285e-12	6.58978	3.11337	1.45096e-12	6.84811	3.10365	2.34449e-12	6.72674	3.0632	hypothetical protein CGI_10010050	0.5535		unknown
CGI_10023514	3.23519	1.43156e-29	188.234	2.11964	1.35295e-06	201.391	3.78075	9.37765e-28	185.457	3.04519	receptor-type tyrosine- phosphatase alpha-like isoform X1	0.5115		GO:0004725;GO:0035335
CGI_10005658	3.32996	4.60013e-32	29.363	2.76765	1.64684e-30	32.0919	2.98779	1.8896e-30	30.9094	3.02847	PREDICTED: uncharacterized protein LOC105330548	0.805		GO:0008270
CGI_10026195	2.92729	3.23943e-13	9.01906	3.49734	2.02909e-16	9.01421	2.58965	2.71526e-11	9.61793	3.00476	Mediator of RNA polymerase II transcription subunit 23	0.8733		unknown
CGI_10018730	4.95197	2.5555e-66	73.7748	1.14397	0.000988935	105.113	2.85917	3.43588e-54	83.371	2.98504	dLp HDL-BGBP precursor	0.7085		GO:0006869;GO:0005319
CGI_10022428	2.23517	3.66677e-23	49.3742	4.04853	8.1483e-45	44.8304	2.66292	4.99828e-33	48.3139	2.98221	Cysteinyl-tRNA cytoplasmic	0.848		GO:0004812;GO:0008270;GO:0008152
CGI_10017284	4.16473	2.70724e-26	16.6593	1.14821	0.0160662	18.3874	3.60411	2.87337e-23	17.5747	2.97235	hypothetical protein CGI_10017284	0.7533		GO:0005634;GO:0003677;GO:0046872;GO:0006351;GO:0006355;GO:0046983
CGI_10018729	4.91448	2.28595e-93	116.467	1.11414	2.82627e-05	169.27	2.81095	2.88098e-79	131.908	2.94652	apolipophorins- partial	0.6895		GO:0006869;GO:0005319
CGI_10019002	2.52706	6.06453e-33	1615.77	4.65307	7.25952e-106	1501.1	1.5151	2.33936e-05	1831.24	2.89841	hypothetical protein CGI_10019002	0.736		unknown
CGI_10022916	1.65114	6.48151e-22	128.422	3.24697	6.74785e-45	111.311	3.7961	1.59857e-76	106.733	2.89807	Multiple epidermal growth factor-like domains 6	0.6285		GO:0004725;GO:0016021;GO:0035335
CGI_10000419	2.79526	1.52941e-11	10.6562	3.23049	3.12193e-14	10.7947	2.64232	6.10974e-11	11.2114	2.88936	hypothetical protein CGI_10000419	0.815		unknown
CGI_10016635	3.46666	7.59183e-17	9.37393	2.32428	3.6548e-08	10.5952	2.84986	3.50018e-13	10.1689	2.88027	hypothetical protein CGI_10016635	0.5586		unknown
CGI_10013210	3.10982	1.68576e-16	11.9421	2.90617	2.12683e-15	12.7079	2.5804	9.2692e-14	12.9248	2.86546	hypothetical protein CGI_10013210	1		GO:0016021
CGI_10002851	3.32357	4.58762e-50	88.876	2.97578	2.77548e-48	94.8758	2.25711	1.76199e-32	99.9759	2.85215	short-chain collagen C4-like	0.7935		GO:0005581
CGI_10002833	2.50441	3.17566e-27	39.2602	2.5236	5.23272e-25	40.712	3.4922	7.48327e-36	36.9888	2.84007	probable serine threonine- kinase DDB_G0282963	0.7329		unknown
CGI_10005960	2.66122	1.36624e-09	6.10079	2.91386	7.51879e-11	6.25089	2.90492	1.13918e-10	6.14304	2.82667	alpha-crystallin B chain-like [Limulus polyphemus]	0.7915		unknown
CGI_10002371	3.58417	1.13819e-25	18.8909	3.25017	1.19793e-24	20.188	1.63785	3.94299e-08	23.7069	2.82406	hypothetical protein CGI_10002371	1		unknown
CGI_10015702	2.10871	7.18091e-42	103.726	4.44035	3.54272e-77	91.4496	1.70982	1.09271e-12	111.058	2.75296	dual specificity phosphatase 12 isoform X1	0.5785		unknown
CGI_10013714	2.6578	3.25852e-17	17.5043	3.09168	2.09423e-20	17.5346	2.38505	3.53155e-14	18.4945	2.71151	cystatin-A3-like [Crassostrea gigas]	0.6395		unknown
CGI_10003325	2.42693	1.45991e-10	14.643	1.7165	2.71425e-07	17.1972	3.92156	3.94664e-21	13.5364	2.68833	hypothetical protein CGI_10003325	0.86		unknown
CGI_10013126	3.35397	7.19663e-22	29.6578	1.56619	7.14738e-08	38.0404	3.0994	5.49957e-22	31.0673	2.67319	stress response nst1-like	0.93		unknown
CGI_10028904	3.26277	1.26672e-21	25.7108	1.19106	0.000191286	35.2175	3.54722	1.96749e-26	26.0626	2.66702	dimethylaniline monooxygenase [N-oxide-forming] 5-like	0.67		GO:0005789;GO:0050661;GO:0050660;GO:0016021;GO:0055114;GO:0044237;GO:0004499
CGI_10000783	3.43174	1.89182e-62	135.202	3.01945	2.97473e-38	143.731	1.52224	1.20958e-11	169.324	2.65781	[Nematostella vectensis]	0.7505		unknown
CGI_10022205	0.523922	0.00359084	372.777	5.71091	9.65989e-114	232.718	1.72621	3.36494e-26	291.26	2.65368	hypothetical protein CGI_10022205	0.698		unknown
CGI_10006146	1.27491	7.64691e-14	402.14	1.55225	1.67163e-17	395.617	5.09602	1.82914e-138	300.334	2.64106	Sarcoplasmic calcium-binding	0.6642		unknown
CGI_10000655	2.99716	1.13709e-14	14.7796	2.22833	7.46067e-10	16.7529	2.68323	6.19263e-13	15.6458	2.63624	hypothetical protein CGI_10000655	1		unknown
CGI_10000296	2.41306	4.98548e-09	7.50214	3.09337	7.19823e-13	7.315	2.38448	3.80931e-09	7.81113	2.6303	THO complex subunit 3	0.879		GO:0003676;GO:0006406;GO:0046872;GO:0016021;GO:0000445
CGI_10008015	1.92905	1.54979e-21	38.9773	3.22393	4.70634e-34	35.2474	2.73758	1.88158e-31	36.1728	2.63019	2 -deoxynucleoside 5 -phosphate N-hydrolase 1	0.7895		GO:0005634;GO:0050144;GO:0030307;GO:0070062;GO:0004844;GO:0042803;GO:0070694;GO:0005737;GO:0009116;GO:0009159;GO:0009117
CGI_10011599	1.49836	2.54854e-57	391.257	4.15523	4.75314e-117	315.876	2.1854	1.69123e-49	358.352	2.613	multiple epidermal growth factor-like domains 10	0.753		GO:0016020
CGI_10001040	1.88928	3.08398e-06	86.065	2.84836	1.05723e-12	81.6573	3.05827	3.38649e-14	79.1647	2.59864	hypothetical protein CGI_10001040	1		unknown
CGI_10008966	2.50847	3.09166e-10	10.6045	2.75023	2.49409e-11	10.7494	2.44416	1.18836e-09	10.9806	2.56762	apolipo L3-like	0.7321		GO:0004842;GO:0006869;GO:0008270;GO:0016021;GO:0008289;GO:0042157;GO:0005576;GO:0016567
CGI_10002991	2.75866	1.39156e-10	5.42287	2.32051	2.68435e-08	6.03496	2.37493	2.19087e-08	5.90274	2.4847	-like isoform X1 [Biomphalaria glabrata]	0.547		unknown
CGI_10024593	1.4718	2.34528e-05	19.4734	3.47064	1.00709e-19	16.1686	2.42814	9.85444e-12	17.2961	2.45686	hypothetical protein CGI_10024593	1		unknown
CGI_10015379	2.22559	1.68529e-15	18.7913	2.5834	1.04462e-17	18.7149	2.48907	5.89777e-18	18.6476	2.43269	hypothetical protein CGI_10015379	1		unknown
CGI_10015724	2.74454	1.03529e-19	22.4829	2.29784	1.60392e-16	24.6203	2.25529	1.15623e-13	24.1889	2.43255	hypothetical protein CGI_10015724	0.711		GO:0016020
CGI_10014804	4.21608	6.26107e-46	38.8997	1.84149	1.39009e-14	49.0292	1.20916	1.15623e-13	54.7116	2.42224	hypothetical protein CGI_10014804	0.7475		GO:0008270;GO:0016021
CGI_10006981	2.89416	2.09533e-15	23.3533	1.58008	4.56026e-06	28.7615	2.74081	1.14626e-13	24.186	2.40502	monocarboxylate transporter 14-like [Aplysia californica]	0.648		GO:0055085;GO:0016021
CGI_10011145	2.23118	7.03465e-07	3.36859	2.48585	5.88709e-08	3.41026	2.47707	7.89072e-08	3.35053	2.39804	histone-lysine N-methyltransferase 2D-like	1		unknown
CGI_10004068	1.80413	2.28718e-09	78.9131	2.65877	2.74845e-16	73.685	2.69647	2.9006e-17	72.3761	2.38646	hypothetical protein CGI_10004068	1		unknown
CGI_10003489	3.07372	3.18361e-15	9.49401	0.88498	0.0357913	13.7478	3.16582	1.60519e-15	9.66679	2.37484	hypothetical protein CGI_10003489	0.78		unknown
CGI_10013495	2.27717	7.93455e-18	128.488	2.40986	2.79652e-21	132.06	2.41741	5.8026e-19	129.162	2.36814	C-type mannose receptor 2-like	0.6529		GO:0016021
CGI_10018815	2.15761	7.86314e-09	8.54366	1.61453	3.72916e-06	9.86446	3.28243	7.83032e-15	7.75837	2.35152	homeobox 2-like	0.7867		unknown
CGI_10023330	0.830391	0.00828021	22.9963	3.0742	3.53934e-19	16.7788	3.11484	1.74184e-19	16.4816	2.33981	histidine-rich PFHRP-III-like [Crassostrea gigas]	0.8575		unknown
CGI_10000769	1.58805	1.66444e-05	19.6075	3.14083	9.9081e-17	17.1438	2.28869	1.3384e-10	18.2809	2.33919	PREDICTED: uncharacterized protein LOC105326022 [Crassostrea gigas]	0.5789		unknown
CGI_10005415	1.35812	3.2746e-05	21.1495	2.82147	6.9538e-16	17.9164	2.83742	6.79934e-17	17.6468	2.339	muscle M-line assembly unc-89-like	0.687		unknown
CGI_10025627	1.55131	6.97011e-10	23.1321	2.84556	2.83611e-21	20.2106	2.61391	5.1483e-20	20.3197	2.33693	PREDICTED: uncharacterized protein LOC105321046	0.865		GO:0003677
CGI_10018816	1.60428	1.10225e-17	70.0333	0.680339	0.0018535	89.3675	4.71407	4.90205e-56	55.7517	2.3329	hypothetical protein CGI_10018816	1		unknown
CGI_10014009	0.828617	0.0107939	13.1369	3.28871	1.58278e-15	9.15184	2.86332	4.35048e-13	9.34437	2.32688	M-phase inducer phosphatase	0.7145		GO:0004725;GO:0035335;GO:0005622
CGI_10021814	0.692189	4.04232e-05	140.843	1.70791	4.40449e-23	117.651	4.57591	3.76772e-79	92.2163	2.32534	[Nematostella vectensis]	0.5635		unknown
CGI_10007287	0.77696	0.011549	25.9068	2.81641	5.4226e-17	19.0575	3.3113	7.10986e-19	17.9255	2.30156	Fibronectin type III domain-containing 1	0.6775		unknown
CGI_10025873	2.76455	1.11947e-14	19.2755	2.24688	8.23702e-11	21.2097	1.84765	7.43073e-08	22.0334	2.28636	MAM and LDL-receptor class A domain-containing 1-like isoform X2	0.906		unknown
CGI_10020542	2.20092	2.49411e-15	207.101	2.3437	5.99614e-18	212.342	2.29398	1.20352e-16	209.654	2.27953	estrogen sulfotransferase-like	0.6615		GO:0008152;GO:0008146
CGI_10002472	2.51227	1.78274e-34	83.7424	3.41127	3.26506e-60	81.2043	0.8983	8.67402e-14	113.426	2.27395	Tripartite motif-containing 45	0.597		GO:0008270;GO:0005622;GO:0016567
CGI_10018585	4.0231	1.36323e-48	257.946	0.655377	0.0122199	414.874	2.09417	2.23089e-18	305.337	2.25755	short-chain collagen C4-like [Crassostrea gigas]	0.6935		unknown
CGI_10027447	2.38995	3.87017e-09	6.82604	1.89637	8.72166e-07	7.74313	2.4854	1.3656e-09	6.9673	2.25724	kinetochore Spc25-like	0.9633		unknown
CGI_10009868	0.72779	0.0484193	29.9776	3.30563	6.95096e-19	21.0666	2.65181	1.02014e-13	21.7975	2.22841	PREDICTED: uncharacterized protein LOC105333912 [Crassostrea gigas]	0.6471		unknown
CGI_10012601	1.71791	1.08706e-10	20.7103	3.47242	3.32734e-23	17.7309	1.47478	1.75576e-07	22.036	2.2217	nuclease HARBI1	0.6345		unknown
CGI_10012952	3.21769	1.35647e-58	262.323	2.50333	7.79865e-66	291.049	0.935922	1.28342e-08	370.049	2.21898	Pentraxin fusion	0.7315		unknown
CGI_10014898	2.78611	4.42816e-64	154.359	1.55682	1.92825e-14	186.622	2.29685	1.38574e-21	163.624	2.21326	hypothetical protein CGI_10014898	0.733		unknown
CGI_10008148	2.74582	1.97854e-31	64.8741	1.27765	1.57628e-10	83.4848	2.55448	2.48335e-36	67.8521	2.19265	perlucin isoform X1 [Crassostrea gigas]	0.655		unknown
CGI_10026439	2.09718	5.03054e-06	3.20174	2.22315	1.99293e-06	3.32708	2.21845	2.45664e-06	3.26786	2.17959	hypothetical protein CGI_10026439	1		unknown
CGI_10022179	1.41598	6.1765e-13	128.889	2.52785	1.02434e-44	114.681	2.5688	5.23402e-47	112.168	2.17088	hypothetical protein CGI_10022179	1		unknown
CGI_10018688	2.39884	9.9526e-12	11.2493	2.80409	1.11447e-14	11.249	1.24174	1.97042e-05	14.2306	2.14822	PREDICTED: uncharacterized protein LOC105323840 [Crassostrea gigas]	0.6591		unknown
CGI_10010111	1.1169	6.10101e-15	166.824	4.05471	3.3714e-63	125.004	1.25994	1.0418e-09	163.874	2.14385	Tripartite motif-containing 2	0.7635		GO:0016567
CGI_10002244	1.36508	0.00084888	6.82805	2.45459	1.25427e-08	5.87967	2.54677	5.81895e-09	5.68012	2.12215	hypothetical protein CGI_10002244	0.6545		GO:0008270
CGI_10020114	1.09977	0.000733506	20.9919	4.06324	3.10391e-23	15.4713	1.19901	0.000161702	21.1467	2.12068	VWFA and cache domain-containing 1	0.7075		unknown
CGI_10011759	2.11503	3.14692e-162	6394.77	2.14896	1.93695e-102	6608.16	2.08059	1.03064e-141	6557.84	2.11486	Inactive ubiquitin carboxyl-terminal hydrolase 54	0.71		GO:0008152;GO:0016787
CGI_10013606	1.96418	1.7806e-05	4.69055	2.05194	7.67519e-06	4.94228	2.31309	6.8972e-07	4.60797	2.10974	Homeobox MSX-1	0.861		GO:0005634;GO:0016020;GO:0006355;GO:0043565
CGI_10005464	2.36758	7.70942e-13	18.1518	1.81873	8.63444e-09	20.4199	2.10936	1.44115e-10	19.1846	2.09856	hypothetical protein CGI_10005464	0.7742		GO:0016021
CGI_10014423	1.8678	3.88029e-05	4.2511	2.21872	1.38316e-06	4.20842	2.20884	1.79739e-06	4.13507	2.09845	Three prime repair exonuclease 1	0.615		GO:0003676
CGI_10023615	2.19699	5.67042e-09	8.3423	1.68083	2.41129e-06	9.4697	2.35889	4.53622e-09	8.27581	2.07891	hypothetical protein CGI_10023615	0.9		unknown
CGI_10007614	2.28322	1.64907e-07	4.9243	2.26209	3.02457e-07	5.17476	1.68084	0.000140866	5.5586	2.07538	Disintegrin and metallo ase domain-containing 10	0.602		GO:0008270;GO:0007229;GO:0005515;GO:0007219;GO:0006509;GO:0005737;GO:0043231;GO:0016021;GO:0004222
CGI_10010049	2.31933	1.8136e-18	105.73	0.642117	0.0487256	151.106	3.2622	3.63425e-33	99.839	2.07455	ankyrin repeat domain-containing 29-like	0.679		GO:0016021
CGI_10004109	1.9627	6.30606e-17	1533.43	2.24922	3.03321e-24	1539.77	2.00604	3.25621e-20	1561.96	2.07265	Sequestosome-1	0.633		GO:0005515;GO:0010506;GO:0044424;GO:0009987
CGI_10001376	1.67114	0.00013582	4.3395	2.52853	3.41839e-08	3.87872	2.0116	9.42169e-06	4.16982	2.07043	Calmodulin 3	0.8843		GO:0005509
CGI_10014897	1.82341	4.9157e-12	24.7403	1.87919	1.48081e-13	25.6084	2.46712	4.64762e-19	23.2333	2.05657	hypothetical protein CGI_10014897	0.785		unknown
CGI_10027551	2.40361	7.31272e-08	4.53073	2.1903	9.48463e-07	4.94394	1.55757	0.00039233	5.50442	2.05049	[Nematostella vectensis]	0.613		unknown
CGI_10002146	1.31314	5.95701e-10	40.7068	2.33718	3.85889e-23	35.9538	2.49531	5.46066e-26	34.7599	2.04855	ADAM family mig-17	0.662		GO:0006508;GO:0004222
CGI_10028119	1.94933	3.41286e-26	100.352	1.99978	1.66944e-28	103.675	2.14669	1.41548e-28	99.7127	2.03193	sodium glucose cotransporter 5-like	0.757		GO:0055085;GO:0016021;GO:0005215
CGI_10012036	2.20123	3.17421e-18	74.7011	1.34533	6.23335e-09	89.5539	2.54177	1.10857e-15	72.4411	2.02944	---NA---	0		unknown
CGI_10028564	2.66996	1.19262e-10	7.66605	1.06799	0.00579721	10.6642	2.34615	7.16849e-09	8.18843	2.02803	hypothetical protein CGI_10028564	1		unknown
CGI_10013812	2.11178	3.65251e-29	67.892	1.82486	5.16137e-25	73.6274	2.14633	1.84526e-28	69.0041	2.02765	stimulated by retinoic acid gene 6 homolog [Crassostrea gigas]	0.8286		GO:0016021;GO:0005576;GO:0005179
CGI_10009581	1.92033	3.06464e-11	30.717	3.33504	1.48174e-21	27.5708	0.814962	0.0300448	38.8417	2.02344	PREDICTED: uncharacterized protein LOC105335392	0.6045		unknown
CGI_10004500	3.29813	7.89997e-32	34.9354	1.95756	1.39496e-05	37.7806	0.762208	0.00211977	52.07	2.00597	hypothetical protein CGI_10004500	0.666		unknown
CGI_10010122	2.24952	3.98027e-12	13.1741	1.7266	2.72268e-07	14.7159	2.03081	3.29722e-11	13.9306	2.00231	microfibril-associated glyco 4-like	0.7695		unknown
CGI_10004728	2.31332	7.84769e-09	8.61067	1.49348	2.38122e-05	10.4956	2.18312	1.49431e-08	9.07153	1.99664	THAP domain-containing 11-like	0.875		unknown
CGI_10011022	2.33794	1.53194e-07	3.64918	2.30662	3.05665e-07	3.85797	1.34196	0.00156308	4.67251	1.9955	hypothetical protein CGI_10011022	0.6411		unknown
CGI_10017652	1.96975	2.59623e-06	5.37619	1.85184	6.47765e-06	5.77174	2.15428	4.52665e-07	5.36214	1.99196	hypothetical protein CGI_10017652	0.8417		GO:0003676;GO:0008270
CGI_10006167	2.46355	7.82163e-15	17.4617	1.08454	3.81451e-05	23.0795	2.41195	1.62923e-14	18.0113	1.98668	phospholipid scramblase 1-like	0.718		unknown
CGI_10006269	1.20278	0.00643619	4.52526	2.23859	8.63236e-07	3.79198	2.51449	4.73547e-08	3.57027	1.98529	tripartite motif-containing 2-like	0.867		GO:0022891;GO:0055085;GO:0016021;GO:0016567
CGI_10003336	3.18087	1.76381e-133	216.702	0.291258	0.0189589	369.909	2.4766	5.76652e-105	235.173	1.98291	brain-specific angiogenesis inhibitor 1-like	0.692		GO:0004930;GO:0007186;GO:0005509;GO:0016021;GO:0007166;GO:0030246
CGI_10005150	1.8883	4.43699e-22	103.669	2.47076	1.50686e-36	100.294	1.58964	6.81218e-18	111.443	1.9829	transmembrane receptor tyrosine kinase [Galdieria sulphuraria]	0.4515		unknown
CGI_10009618	1.43036	3.74847e-09	31.4299	1.83683	2.38182e-13	30.3918	2.67313	2.82431e-22	26.9905	1.98011	Myeloid leukemia factor 1	0.6805		GO:0016021
CGI_10005465	2.43069	3.16867e-13	16.3339	1.82458	1.0796e-08	18.4787	1.64267	2.23416e-08	18.8366	1.96598	hypothetical protein CGI_10005465	0.922		GO:0016021
CGI_10017039	1.71641	0.000138636	3.79368	2.03867	8.21468e-06	3.74845	2.14283	3.54917e-06	3.59792	1.96597	Star [Trichinella murrelli]	0.7365		unknown
CGI_10011593	1.49614	3.9524e-05	12.5101	2.21524	8.99081e-09	11.5562	2.18393	1.6492e-08	11.4063	1.9651	P2X purinoceptor 7-like	0.6935		GO:0004931;GO:0005887;GO:0035590;GO:0033198;GO:0001614;GO:0098655
CGI_10017038	1.67113	0.000314388	2.80768	2.04287	1.29831e-05	2.73084	2.17728	3.81657e-06	2.60536	1.96376	hypothetical protein CGI_10017038	0.737		unknown
CGI_10006654	1.54263	0.000207917	16.4515	3.22079	7.32236e-16	14.3673	1.05721	0.00143274	19.4972	1.94021	G- coupled receptor Mth2	0.509		GO:0004930;GO:0007186;GO:0016021;GO:0007166
CGI_10016026	2.55558	6.89567e-19	43.7392	2.55133	1.7616e-20	45.7549	0.696822	0.00954383	62.8961	1.93458	proteoglycan 4-like	0.72		GO:0005488;GO:0009987
CGI_10001456	1.55002	9.42487e-06	54.1473	2.68024	1.46838e-18	49.3548	1.54975	2.28735e-10	57.0702	1.92667	Retrovirus-related Pol poly from transposon	0.5795		GO:0005488
CGI_10018589	1.20201	0.000309972	48.1624	1.70997	5.27642e-17	46.8627	2.86801	7.45981e-32	39.867	1.92666	hypothetical protein CGI_10018589	0.8525		unknown
CGI_10000510	1.81573	9.00967e-12	20.2643	2.29372	4.87098e-17	19.7526	1.65031	2.94462e-11	21.4573	1.91992	Werner syndrome ATP-dependent helicase	0.5975		GO:0008152;GO:0004386
CGI_10000420	1.98494	1.71377e-05	2.3733	1.82342	0.000114758	2.63618	1.94653	4.1907e-05	2.49931	1.9183	hypothetical protein CGI_10000420	1		unknown
CGI_10007450	1.79732	9.92167e-05	2.61238	1.89964	4.97654e-05	2.68737	2.02323	1.78387e-05	2.56802	1.90673	Kif3a partial	0.9975		GO:0032391;GO:0060122;GO:0090316;GO:0036334;GO:1904115;GO:0061351;GO:0008544;GO:0009952;GO:1903887;GO:0043025;GO:0097470;GO:0005930;GO:0005524;GO:0097542;GO:0072383;GO:0070062;GO:0030507;GO:0001701;GO:0001822;GO:0005829;GO:0001947;GO:0031512;GO:0019886;GO:0048260;GO:0050679;GO:2000771;GO:0021904;GO:0035058;GO:0006890;GO:0008152;GO:0016939;GO:0007224;GO:0008574;GO:0021542;GO:0008017;GO:0005876;GO:…
CGI_10011018	1.28346	7.28731e-06	14.6761	1.49535	4.60427e-07	14.5813	2.93385	6.4758e-16	11.7199	1.90422	Tripartite motif-containing 3	0.8395		GO:0008270;GO:0005622;GO:0016567
CGI_10018973	1.5956	4.28354e-14	43.4158	1.99826	4.89141e-19	42.3117	2.09456	1.06251e-22	41.0785	1.89614	hypothetical protein CGI_10018973	0.5685		unknown
CGI_10000491	1.75314	0.000139246	3.86538	1.9542	2.76847e-05	3.90843	1.94507	3.39263e-05	3.84256	1.88414	Polypeptide N-acetylgalactosaminyltransferase 5	0.9653		GO:0008152;GO:0016021;GO:0016740
CGI_10000749	1.53788	3.51263e-07	48.0127	2.46454	8.27442e-24	44.4439	1.64363	5.17596e-14	49.1491	1.88202	Beta-1,4-N-acetylgalactosaminyltransferase bre-4	0.811		GO:0005975;GO:0016757;GO:0016021
CGI_10027910	1.5681	5.8434e-24	315.633	2.76343	6.4429e-34	279.216	1.29528	5.52322e-14	339.19	1.87561	NRDE2 homolog	0.7595		GO:0008270;GO:0005622
CGI_10021511	1.4974	3.11104e-27	772.534	3.02874	6.38501e-65	663.489	1.05967	1.30424e-15	863.204	1.86194	short-chain dehydrogenase [Streptomyces JS01]	0.6935		GO:0016491;GO:0016021;GO:0055114
CGI_10022407	1.68394	9.37693e-13	72.7628	1.40394	2.99422e-08	79.2919	2.45666	5.23255e-28	67.1763	1.84818	complement C1q tumor necrosis factor-related 3-like	0.7605		GO:0005581
CGI_10017129	2.22287	1.71174e-28	55.2417	1.55932	2.41599e-19	63.7113	1.75002	3.79359e-24	60.7418	1.84407	cell wall integrity and stress response component 2-like [Crassostrea gigas]	0.86		unknown
CGI_10011449	2.47037	8.10717e-09	5.68902	1.10992	0.0042031	7.79293	1.92604	3.7088e-06	6.39375	1.83544	hypothetical protein CGI_10011449	0.7235		GO:0016020
CGI_10017130	1.77401	3.47214e-08	13.8019	1.88957	1.49563e-08	14.1009	1.8414	1.59622e-08	13.9718	1.83499	cell wall integrity and stress response component 2-like [Crassostrea gigas]	0.8433		unknown
CGI_10016763	1.84346	4.02609e-17	61.4345	2.19699	3.1038e-20	60.6584	1.45671	1.55303e-10	67.0674	1.83239	telomere repeats-binding bouquet formation 1	0.555		unknown
CGI_10015883	3.16238	6.10409e-49	60.3604	0.79414	0.000791705	89.2702	1.52357	4.66377e-12	74.6479	1.8267	von Willebrand factor type EGF and pentraxin domain-containing 1	0.643		unknown
CGI_10024217	1.44263	4.70243e-10	138.621	2.44287	4.5659e-21	123.951	1.58699	3.12139e-10	137.308	1.82416	PREDICTED: uncharacterized protein LOC105338212 [Crassostrea gigas]	0.925		GO:0016021
CGI_10000814	2.02286	2.59268e-06	4.63786	1.69786	5.14985e-05	5.20543	1.69015	0.000101891	5.10147	1.80362	hypothetical protein CGI_10000814	1		unknown
CGI_10001288	1.34005	5.93336e-21	123.235	2.15403	4.24152e-37	111.958	1.91469	7.12969e-26	113.538	1.80292	enzymatic poly	0.632		unknown
CGI_10005347	0.754113	0.000702471	40.0632	2.65924	2.04192e-24	29.8922	1.96083	7.99905e-16	31.9469	1.7914	Tripartite motif-containing 2	0.817		GO:0008270;GO:0005622;GO:0016567
CGI_10006956	2.67126	1.29016e-30	36.2683	0.867932	1.99632e-05	51.0348	1.8333	6.40155e-19	41.2146	1.79083	PREDICTED: uncharacterized protein LOC105319865	0.5705		GO:0016021
CGI_10002036	2.10648	4.40323e-10	51.7372	1.67913	9.0993e-07	57.3824	1.57632	1.78143e-06	57.6756	1.78731	multiple epidermal growth factor-like domains 6	0.569		GO:0016021
CGI_10001540	1.8066	8.45405e-05	3.38838	2.05204	9.7701e-06	3.42211	1.49837	0.00128228	3.77634	1.78567	fucolectin-like [Crassostrea gigas]	0.831		GO:0003677;GO:0003713;GO:0006355
CGI_10003386	1.52183	0.000243215	5.61892	1.97125	2.22061e-06	5.41016	1.86261	7.35215e-06	5.42171	1.78523	Sodium- and chloride-dependent glycine transporter 2	0.699		GO:0016020;GO:0015293;GO:0044765
CGI_10023562	1.69432	3.53792e-16	33.3685	1.06232	2.20211e-06	39.2573	2.58516	3.13927e-26	30.1765	1.7806	Voltage-gated hydrogen channel 1	0.667		GO:0016021
CGI_10010756	3.02444	8.80114e-67	164.805	0.775918	1.93081e-07	242.845	1.52714	3.26764e-24	202.246	1.77583	D-aspartate oxidase-like	0.8005		GO:0071949;GO:0055114;GO:0003884;GO:0046416
CGI_10010542	2.04907	1.33285e-19	347.85	1.13664	1.49403e-08	426.541	2.13279	1.16588e-27	353.327	1.77283	Scavenger receptor class F member 2	0.8105		GO:0016310;GO:0016301
CGI_10006028	3.26753	7.38686e-41	58.0358	0.716167	5.03066e-08	89.3349	1.33153	6.16892e-17	75.8726	1.77174	VWFA and cache domain-containing 1	0.743		GO:0004402;GO:0008270;GO:0003713;GO:0016020;GO:0006355;GO:0016573;GO:0000123
CGI_10010016	0.843533	0.00418456	19.6925	1.56419	2.27823e-08	17.5394	2.8757	6.4671e-17	14.391	1.76114	fuzzy homolog	0.696		unknown
CGI_10017601	1.91196	3.45384e-05	2.54806	1.51181	0.00133174	2.96831	1.84879	9.547e-05	2.67411	1.75752	enzymatic poly	0.7415		GO:0003676;GO:0008270
CGI_10001512	0.977963	8.89557e-14	94.2438	2.34651	7.10528e-39	77.2554	1.93883	2.07573e-25	79.9661	1.75443	caspase-7-like isoform X1 [Crassostrea gigas]	0.8989		unknown
CGI_10005045	1.55219	5.03845e-11	28.2385	1.26448	1.71588e-08	31.1146	2.43123	1.42939e-18	25.2673	1.7493	hypothetical protein CGI_10005045	1		unknown
CGI_10018919	1.02711	4.11386e-05	39.5946	1.78663	7.70312e-10	35.1071	2.4053	2.23809e-17	31.9405	1.73968	leucine-rich repeat-containing 51 isoform X1 [Rattus norvegicus]	0.7245		GO:0016740
CGI_10025973	0.921714	0.000212138	29.9605	1.52283	1.28201e-11	27.3975	2.7688	1.71427e-22	22.6789	1.73778	hypothetical protein CGI_10025973	0.8167		unknown
CGI_10014489	0.921075	0.020845	8.2685	2.02483	1.87402e-06	6.67452	2.26723	1.29998e-07	6.35715	1.73771	CAD	0.906		GO:0004070;GO:0008270;GO:0004151;GO:0004087;GO:0006541;GO:0046777;GO:0004672;GO:0004088;GO:0044205;GO:0002134;GO:0005524;GO:0006207;GO:0006526;GO:0000050;GO:0005739;GO:0070335;GO:0005829;GO:0016363;GO:0018107
CGI_10009077	1.85757	3.0204e-06	7.20743	2.20962	4.06163e-08	7.13876	1.14431	0.00261184	8.60929	1.73717	von Willebrand factor A domain-containing 9 [Sinocyclocheilus anshuiensis]	0.716		unknown
CGI_10018091	2.14782	3.79585e-07	5.97496	1.58392	7.246e-05	6.98123	1.42877	0.000376259	7.0958	1.72017	Prostaglandin E2 receptor EP4 subtype	0.763		GO:0004930;GO:0007186;GO:0016021
CGI_10008394	1.98426	3.69914e-06	5.79819	2.29748	1.17545e-07	5.82162	0.850099	0.0413067	7.81519	1.71061	THAP domain-containing 4	0.8935		GO:0003676;GO:0006353;GO:0016884
CGI_10008189	1.7472	8.55454e-20	69.1495	1.39418	7.77437e-12	76.4494	1.97662	3.10744e-34	68.4999	1.706	blastula protease 10- partial	0.6905		GO:0008270;GO:0016020;GO:0006508;GO:0004222
CGI_10009329	0.668312	3.7477e-09	1043.03	1.98939	4.08079e-71	831.587	2.43055	5.50547e-42	768.258	1.69608	hypothetical protein CGI_10009329	0.647		unknown
CGI_10025092	1.81806	6.6804e-26	576.443	1.77851	1.12435e-24	603.198	1.4592	8.38956e-24	628.081	1.68525	cytochrome P450 49a1	0.811		GO:0000287;GO:0004634;GO:0016491;GO:0006096;GO:0016021;GO:0000015
CGI_10000596	2.2014	1.17254e-08	66.758	1.68187	0.000471448	65.691	1.16797	0.00672607	80.4256	1.68375	alpha-(1,3)-fucosyltransferase C-like [Biomphalaria glabrata]	0.5935		GO:0008417;GO:0032580;GO:0036065;GO:0016021;GO:0006486
CGI_10024611	1.45975	0.00216305	3.13073	1.95838	2.88325e-05	3.06847	1.62426	0.000506366	3.28902	1.6808	hypothetical protein CGI_10024611	0.9		unknown
CGI_10023829	1.45277	0.000124013	10.9159	1.96258	1.07221e-07	10.4401	1.59548	1.80648e-05	10.8909	1.67028	G- coupled receptor GRL101-like	0.6135		GO:0007186;GO:0016021;GO:0016500;GO:0008063
CGI_10028284	1.30258	2.35448e-09	45.228	1.88329	5.02782e-19	42.628	1.80802	1.36908e-20	42.4419	1.66463	receptor-type tyrosine- phosphatase alpha-like	0.7629		GO:0016311
CGI_10021412	1.24723	1.07565e-08	34.8024	1.6356	5.6546e-14	33.5704	2.1096	3.16279e-20	30.6082	1.66414	Scavenger receptor class F member 2	0.697		unknown
CGI_10022802	1.77503	0.000131274	2.67835	1.06594	0.0260226	3.44571	2.1346	6.21049e-06	2.56228	1.65852	Three prime repair exonuclease 1	0.674		GO:0003676;GO:0009987
CGI_10005657	1.74261	5.61727e-06	6.73419	1.2082	0.000945088	7.91256	2.01607	4.85079e-07	6.54925	1.65563	P2X purinoceptor 7-like	0.699		GO:0004931;GO:0005887;GO:0035590;GO:0033198;GO:0001614;GO:0098655
CGI_10013305	1.60903	6.04446e-13	1045.8	1.38858	3.48383e-09	1130.25	1.92833	1.90345e-19	1017.2	1.64198	cephalotoxin [Crassostrea gigas]	0.5585		unknown
CGI_10027550	1.77669	0.000135556	2.09108	1.63638	0.000684371	2.34349	1.50503	0.00197158	2.40181	1.63936	[Nematostella vectensis]	0.608		unknown
CGI_10010501	1.10598	4.10312e-09	96.1872	1.21846	5.79951e-16	97.9274	2.59274	1.87294e-43	78.0849	1.63906	Tripartite motif-containing 2	0.8775		GO:0008270;GO:0071203;GO:0016567
CGI_10009166	1.98495	1.30578e-12	20.0458	1.26169	4.38361e-07	23.8817	1.63144	1.12317e-06	21.4527	1.62603	leucine rich repeat	0.573		GO:0008063
CGI_10006414	1.77813	1.43522e-18	43.6126	1.51272	3.10155e-14	47.4329	1.58363	1.07094e-16	46.0786	1.62483	PREDICTED: uncharacterized protein DDB_G0283357-like isoform X1	0.9933		unknown
CGI_10009954	2.3166	3.12639e-13	52.5275	1.66901	9.24808e-08	59.9572	0.887525	0.000307616	70.6737	1.62438	cysteine-rich venom -like	0.7375		GO:0005576
CGI_10004033	1.98102	5.31225e-11	16.9719	1.30096	5.99226e-07	20.1884	1.57731	3.14952e-09	18.6784	1.61977	potassium channel regulatory	0.629		GO:0051260
CGI_10005497	1.17366	1.22933e-05	18.0729	1.93859	7.58128e-11	16.3016	1.74527	2.87199e-10	16.5354	1.61917	multiple epidermal growth factor-like domains 10	0.67		unknown
CGI_10009734	1.52176	3.36303e-20	79.0821	1.31944	1.89848e-10	85.0011	2.00269	3.5374e-23	74.4735	1.61463	hypothetical protein CGI_10009734	0.708		GO:0016020
CGI_10011175	2.43693	3.49561e-24	43.2427	1.98338	5.29046e-20	47.8275	0.422103	0.0259336	66.4151	1.61414	Collagen alpha-5(VI) chain	0.571		GO:0005581
CGI_10023614	1.45403	7.58127e-05	9.92088	1.26094	0.000212739	10.8899	2.11684	1.70672e-08	9.07181	1.6106	hypothetical protein CGI_10023614	0.69		unknown
CGI_10009259	1.88228	2.45602e-25	194.9	1.6436	3.8865e-29	211.418	1.30286	3.14747e-16	221.017	1.60958	serrate RNA effector molecule homolog	0.6875		unknown
CGI_10004631	0.831781	1.98602e-08	85.9767	2.16917	1.59885e-36	69.2763	1.82279	2.26408e-33	71.7897	1.60791	2 -deoxynucleoside 5 -phosphate N-hydrolase 1	0.7905		GO:0005634;GO:0050144;GO:0030307;GO:0070062;GO:0004844;GO:0042803;GO:0070694;GO:0005737;GO:0009116;GO:0009159;GO:0009117
CGI_10015614	1.20275	5.63617e-08	133.116	1.50475	1.99477e-11	130.349	2.10891	3.18183e-18	116.13	1.60547	serine threonine- phosphatase 6 regulatory ankyrin repeat subunit B-like	0.8485		unknown
CGI_10027891	1.72403	7.80029e-15	38.8362	1.73024	2.22221e-16	40.4086	1.34917	1.81963e-09	42.47	1.60115	mitochondrial substrate carrier family ucpB-like	0.794		GO:0003735;GO:0016021;GO:0006810;GO:0006412
CGI_10005152	1.69933	3.42867e-05	7.04398	1.91092	2.33825e-06	7.13876	1.18418	0.00410883	8.13334	1.59815	hypothetical protein CGI_10005152	0.985		unknown
CGI_10027201	1.77039	0.000147182	1.84814	1.44356	0.00303425	2.15622	1.55454	0.00140916	2.03889	1.5895	DNA polymerase III polC-type [Crassostrea gigas]	0.5739		GO:0003676
CGI_10011767	1.60377	0.000681438	2.59008	1.74762	0.000253596	2.68825	1.38134	0.00453504	2.89697	1.57758	eukaryotic translation initiation factor 4E type 2 isoform X3	0.8315		GO:0003743;GO:0005845;GO:0031625;GO:0005737;GO:0001701;GO:0006413;GO:0017148;GO:0044822
CGI_10004159	1.90729	8.33882e-11	40.9512	1.89848	1.72133e-11	42.7793	0.925984	0.0138907	49.9427	1.57725	asunder homolog isoform X2	0.7495		GO:0005634;GO:0030317;GO:0005737;GO:0080154;GO:0007346
CGI_10025991	0.665325	0.046194	24.4357	0.737482	0.0154877	24.9286	3.3116	1.11551e-18	16.3652	1.57147	PC4-domain-containing [Coccomyxa subellipsoidea C-169]	0.6182		GO:0003677;GO:0003713;GO:0006355
CGI_10024870	1.36501	0.0037289	3853.99	1.11503	0.0246521	4216.93	2.22644	2.16172e-06	3726.88	1.56883	acidic mammalian chitinase-like	0.701		GO:0004568;GO:0005975;GO:0008061;GO:0006032;GO:0005576
CGI_10007056	2.45974	5.46851e-09	6.27912	1.07062	0.00345054	8.69938	1.1609	0.00271843	8.30423	1.56375	Tripartite motif-containing 3	1		GO:0016567
CGI_10001319	0.966834	0.000190417	27.8179	0.748569	0.0140184	30.5547	2.9702	6.1857e-20	20.7931	1.56187	transmembrane GTPase Marf-like	0.5635		unknown
CGI_10010135	1.51625	3.43883e-09	35.0642	1.44642	6.16919e-10	37.262	1.69465	5.15218e-13	35.0112	1.55244	Laminin subunit alpha-1	0.5487		unknown
CGI_10008331	1.04401	6.86636e-08	55.9566	1.69346	9.05961e-18	51.1198	1.91941	1.92517e-23	48.5119	1.5523	protocadherin Fat 3-like	0.5705		GO:0005509;GO:0016020;GO:0007156
CGI_10021317	1.53779	0.000162946	6.52258	1.63113	7.87812e-05	6.66596	1.48072	0.000149078	6.83682	1.54988	IMPACT	0.623		unknown
CGI_10017237	0.836058	0.00024093	30.9654	1.49026	4.09083e-11	27.7104	2.30005	1.29479e-19	24.0426	1.54212	Fibronectin type III domain-containing 1	0.8986		unknown
CGI_10028463	1.54839	0.00106455	2.1727	1.27363	0.0092055	2.48048	1.76749	0.000239627	2.11865	1.52984	hypothetical protein CGI_10028463	0.8545		GO:0003700;GO:0003824;GO:0009116;GO:0006355
CGI_10019932	1.24349	3.68199e-17	149.803	1.88235	4.03575e-23	138.077	1.40076	1.27977e-19	148.002	1.50887	meiotically up-regulated gene 158 -like [Biomphalaria glabrata]	0.712		unknown
CGI_10022464	1.11948	2.50684e-11	2560.15	1.85203	1.04084e-32	2327.17	1.54462	8.23364e-19	2399.94	1.50538	nidogen and EGF-like domain-containing 1	0.754		GO:0007160;GO:0016021
CGI_10022196	0.674666	0.000325415	170.002	1.90514	2.98979e-24	136.937	1.92171	2.08153e-23	134.146	1.50051	multiple epidermal growth factor-like domains 10	0.593		unknown
CGI_10016833	1.81944	6.53251e-11	33.8788	1.41207	1.47406e-07	38.0144	1.2493	9.72539e-06	38.5734	1.4936	PR domain zinc finger 14	0.728		GO:0003676;GO:0060255;GO:0046872;GO:0044763;GO:0032501;GO:0044767
CGI_10011600	1.71181	0.000262376	2.16698	1.08309	0.0301864	2.73962	1.6733	0.000520654	2.29279	1.4894	hypothetical protein CGI_10011600	0.8888		GO:0003676;GO:0008270;GO:0016021
CGI_10018662	0.862504	4.62333e-06	85.9066	1.8527	6.91547e-20	73.149	1.74544	5.41873e-15	72.9891	1.48688	hypothetical protein CGI_10018662	0.705		unknown
CGI_10005528	1.85322	9.43851e-06	5.32256	1.46426	0.000293931	6.09914	1.12427	0.00411206	6.51051	1.48058	D site-binding	0.8625		GO:0003700;GO:0006355;GO:0043565
CGI_10003931	0.617634	0.013405	40.3786	2.17244	1.00395e-20	30.8078	1.64769	3.33551e-14	32.6785	1.47926	Protocadherin Fat 4	0.679		GO:0005509;GO:0016021;GO:0007156;GO:0005886
CGI_10005994	1.50331	6.63885e-21	75.6438	1.34619	7.93996e-18	81.0209	1.58687	4.23254e-22	75.9772	1.47879	multiple epidermal growth factor-like domains 11	0.5655		GO:0016021
CGI_10017909	0.919778	0.0456534	9.48575	2.01696	1.11305e-05	7.6562	1.49764	0.00146721	8.1996	1.47812	hypothetical protein CGI_10017909	1		unknown
CGI_10013807	1.65875	9.77921e-12	263.321	1.14968	1.43765e-06	302.997	1.61645	1.08618e-11	271.488	1.47496	Trifunctional purine biosynthetic adenosine-3	0.755		GO:0004644;GO:0005524;GO:0043009;GO:0005737;GO:0004637;GO:0046872;GO:0043473;GO:0043010;GO:0006189;GO:0009113;GO:0004641
CGI_10000987	1.48587	2.61775e-07	24.7103	1.97983	2.99463e-10	23.4375	0.95702	0.000293822	28.4765	1.47424	Scavenger receptor class F member 2	0.878		GO:0016310;GO:0016301
CGI_10028312	1.09861	5.40457e-06	345.359	1.48969	1.51203e-09	330.707	1.83193	1.44446e-13	306.673	1.47341	Breast cancer type 1 susceptibility	0.886		GO:0003677;GO:0006310;GO:0015074
CGI_10024459	1.20076	2.53839e-10	107.32	0.983073	5.71624e-07	117.357	2.23094	7.50832e-18	91.5438	1.47159	multiple epidermal growth factor-like domains 10	0.616		GO:0016021;GO:0016310;GO:0016301
CGI_10017541	1.32562	0.000441579	14.8169	2.16241	2.10971e-10	13.5884	0.92038	0.00133286	17.2458	1.46947	gonadotropin-releasing hormone II receptor-like [Octopus bimaculoides]	0.6295		GO:0004930;GO:0007186;GO:0016021
CGI_10015701	1.87283	1.63764e-08	14.0521	1.46684	5.36145e-06	15.7998	1.06455	0.00169765	16.9561	1.46807	hypothetical protein CGI_10015701	0.75		unknown
CGI_10013715	1.38607	0.00259547	2.13496	1.50633	0.00145181	2.22034	1.50652	0.00153302	2.18158	1.46631	cystatin-A3-like [Crassostrea gigas]	0.7065		GO:0004869;GO:0010951
CGI_10001153	1.2304	0.00150797	7.24511	1.42251	0.000329553	7.18136	1.74069	1.6955e-05	6.60844	1.46453	Scavenger receptor class F member 2	0.861		GO:0016021
CGI_10015196	1.16	2.41733e-08	159.145	1.38322	3.67965e-12	158.188	1.83528	9.45555e-19	143.348	1.4595	hypothetical protein CGI_10015196	0.845		unknown
CGI_10011278	1.18804	6.57522e-05	26.0772	1.38715	1.21337e-05	25.8964	1.7907	1.82196e-08	23.6079	1.4553	Serine palmitoyltransferase 2	0.9675		GO:0005975;GO:0008270;GO:0016757;GO:0030170;GO:0016021;GO:0009058;GO:0005622
CGI_10017752	2.50477	3.02314e-23	39.4959	0.912454	7.46915e-05	54.067	0.941666	0.00029221	52.4585	1.45296	retinol dehydrogenase 11-like [Crassostrea gigas]	0.653		GO:0016491;GO:0016021;GO:0055114
CGI_10003754	1.0486	0.0319317	3.20929	1.90256	5.90539e-05	2.60163	1.38802	0.00486416	2.89312	1.44639	hypothetical protein CGI_10003754	0.9933		unknown
CGI_10002614	0.949716	0.000136549	34.4366	0.990485	0.000173164	35.4779	2.39299	7.38633e-14	26.9191	1.4444	hypothetical protein CGI_10002614	1		unknown
CGI_10002145	0.888724	1.32562e-10	363.667	2.42299	6.40395e-69	290.703	1.01099	1.62426e-11	360.192	1.4409	A-agglutinin anchorage subunit-like	0.6205		unknown
CGI_10000364	1.86586	9.90053e-21	106.436	0.883768	9.12773e-08	134.903	1.56559	6.32478e-25	114.928	1.43841	hypothetical protein CGI_10000364	0.855		unknown
CGI_10009389	1.24093	0.0106146	2.35468	1.66973	0.000445402	2.18411	1.4035	0.004297	2.32057	1.43805	PC4-domain-containing [Coccomyxa subellipsoidea C-169]	0.6126		GO:0003677;GO:0003713;GO:0006355
CGI_10015161	1.70723	1.18893e-05	6.59283	1.17972	0.00138654	7.79575	1.42122	0.000185217	7.24505	1.43606	hypothetical protein CGI_10015161	0.9967		unknown
CGI_10021252	1.49396	0.000768832	4.71307	1.6297	0.000219134	4.8243	1.17747	0.0110891	5.18691	1.43371	Phosphorylase b kinase regulatory subunit beta	0.8935		GO:0005516;GO:0005977;GO:0016021;GO:0016310;GO:0016301
CGI_10016573	0.988539	0.0115152	46.1265	1.51745	6.89853e-05	42.5954	1.7951	5.88083e-06	39.573	1.4337	Zonadhesin	0.8067		unknown
CGI_10011858	1.27536	0.0020663	6.40461	1.19947	0.00260028	6.89053	1.80302	4.35321e-05	5.77303	1.42595	guanylate cyclase soluble subunit beta-2-like	0.7705		GO:0008074;GO:0000166;GO:0006182;GO:0016021;GO:0004383;GO:0005886;GO:0004016;GO:0035556;GO:0020037
CGI_10011280	1.95094	1.04174e-38	179.245	1.21634	3.51114e-18	212.322	1.10901	1.52095e-14	213.445	1.42543	cell death abnormality 1-like	0.794		GO:0003723
CGI_10008618	1.27178	0.00015029	87.2109	1.37255	7.90891e-05	88.5934	1.6266	2.19875e-07	83.8	1.42364	Beta-hexosaminidase	0.7475		GO:0005975;GO:0030246;GO:0004563
CGI_10013572	2.40347	1.8069e-39	247.617	0.861169	5.09575e-06	336.914	0.998445	3.52675e-05	317.91	1.42103	receptor-type tyrosine- phosphatase kappa-like	0.7155		GO:0004725;GO:0035335
CGI_10024082	1.40188	7.49667e-22	341.21	1.77286	9.66885e-48	333.102	1.06068	4.77195e-21	375.198	1.41181	Cytosolic Fe-S cluster assembly factor NBP35	0.7478		unknown
CGI_10010260	1.35071	0.00299304	3.7791	1.8211	8.43396e-05	3.51036	1.05821	0.0205872	4.23935	1.41001	---NA---	0		unknown
CGI_10016578	1.19671	0.012283	54.0492	1.24995	0.00673239	57.4875	1.77396	9.13334e-05	50.8473	1.40687	Angiopoietin-1 receptor	0.886		GO:0016021
CGI_10006286	1.30521	2.3644e-11	37.8749	0.888899	4.3961e-06	43.4555	2.01903	6.43682e-21	34.1696	1.40438	Multiple epidermal growth factor-like domains 6	0.543		GO:0016021
CGI_10028310	1.48051	3.97056e-13	57.4368	0.793311	3.03985e-05	69.9736	1.93849	5.88308e-24	54.554	1.40411	cytochrome P450 2C14-like isoform X2 [Crassostrea gigas]	0.7715		GO:0016712;GO:0005506;GO:0055114;GO:0020037
CGI_10012709	1.07116	2.02333e-07	90.3861	1.99903	5.22654e-27	79.5506	1.11057	5.39804e-12	91.9346	1.39359	hypothetical protein CGI_10012709	0.6813		GO:0016021
CGI_10001385	1.80806	4.37294e-05	3.94835	1.48668	0.00063374	4.46602	0.882816	0.0384384	5.22262	1.39252	hypothetical protein CGI_10001385	1		unknown
CGI_10015981	0.415675	0.0228646	269.756	1.25622	5.15294e-13	225.949	2.50241	5.74136e-53	184.432	1.39143	deoxynucleoside triphosphate triphosphohydrolase partial	0.6775		GO:0005488
CGI_10008876	1.57196	1.26221e-10	49.2204	1.49722	1.16234e-09	51.9397	1.1034	6.681e-06	55.3859	1.39086	leucine-rich repeat-containing 74B-like [Acropora digitifera]	0.6075		GO:0005509;GO:0008063
CGI_10002481	1.43464	0.000156637	8.34362	0.718359	0.0443386	10.5688	1.99996	1.4083e-06	7.63944	1.38432	Carboxypeptidase B	0.5985		GO:0008061;GO:0006030;GO:0005576
CGI_10018269	1.6525	2.62414e-05	8.21192	1.62392	8.76995e-06	8.74922	0.868413	0.0211095	10.3018	1.38161	monocarboxylate transporter 14-like [Aplysia californica]	0.677		GO:0055085;GO:0016021
CGI_10014299	1.24329	0.000219934	27.4366	1.427	3.12533e-05	27.4506	1.47294	1.3192e-05	26.7618	1.38107	Tripartite motif-containing 2	0.8005		GO:0008270;GO:0006508;GO:0004222;GO:0005622;GO:0016567
CGI_10019420	1.48867	0.000409966	142.579	0.992891	1.02161e-08	178.416	1.64271	5.12215e-11	151.661	1.37476	hypothetical protein CGI_10019420	0.8467		GO:0016021
CGI_10019171	1.53183	4.52384e-22	79.3158	0.405871	0.00742962	108.367	2.18436	6.18262e-38	73.398	1.37402	ADP-ribosylarginine hydrolase-like isoform X4 [Aplysia californica]	0.7775		GO:0000287;GO:0003875;GO:0031338;GO:0090630;GO:0005096;GO:0012505;GO:0051725;GO:0006886;GO:0017137;GO:0005622
CGI_10025863	1.78111	4.40995e-11	24.8749	1.75833	2.14389e-10	25.9521	0.57394	0.0184704	33.5349	1.37113	IMPACT	0.662		unknown
CGI_10024109	1.16691	0.0171354	2.21079	1.74589	0.000246368	1.99071	1.1942	0.0162181	2.39091	1.369	hypothetical protein CGI_10024109	1		GO:0003677;GO:0006355
CGI_10024318	0.797291	2.99784e-06	223.598	0.978019	1.27276e-09	222.357	2.32669	4.96588e-78	174.197	1.36733	Multiple epidermal growth factor-like domains 10	0.704		GO:0016021
CGI_10028053	1.42119	0.000256195	11.4323	1.52786	7.44824e-05	11.7085	1.13451	0.00234381	12.6809	1.36119	ERGIC-53-like isoform X1	0.8325		GO:0055085;GO:0016021;GO:0046873;GO:0030001;GO:0030246
CGI_10016218	1.88906	1.32527e-15	38.8755	0.988053	2.46251e-05	48.1377	1.20557	1.13001e-09	45.2274	1.36089	hypothetical protein CGI_10016218	1		unknown
CGI_10008218	0.996255	0.00330549	13.4164	1.07937	0.00061495	13.7165	2.00591	7.03855e-08	11.1291	1.36051	SAC3 domain-containing 1	0.925		GO:0016021
CGI_10020649	1.53618	4.09879e-06	31.2446	1.50936	0.00018878	31.7471	1.03583	0.0192153	34.3348	1.36046	Vesicular glutamate transporter 3	0.6481		unknown
CGI_10016277	1.49135	1.20162e-08	72.0524	1.06113	9.71889e-06	82.3688	1.50748	2.86708e-08	73.1719	1.35332	Tripartite motif-containing 2	0.685		GO:0008270;GO:0005622;GO:0016567
CGI_10012434	0.926104	0.00225277	19.5914	1.81998	5.04809e-10	17.0073	1.31302	4.90216e-06	18.3729	1.35303	PREDICTED: uncharacterized protein LOC105318082 [Crassostrea gigas]	0.59		unknown
CGI_10007032	0.926775	0.00781093	10.6408	1.38351	5.11273e-05	9.92863	1.73367	1.40138e-06	9.07606	1.34798	PREDICTED: uncharacterized protein LOC105320337 [Crassostrea gigas]	0.7933		unknown
CGI_10010373	1.68643	3.64746e-07	11.0384	1.41697	1.28226e-05	12.1084	0.939086	0.00350766	13.3901	1.3475	Tripartite motif-containing 45	0.8545		GO:0005524;GO:0008270;GO:0005622;GO:0016567
CGI_10002147	0.937858	4.90252e-06	52.9096	2.10947	3.37724e-24	44.3025	0.993215	2.28483e-07	53.3562	1.34685	zinc metallo ase disintegrin VMP-II-like	0.81		unknown
CGI_10026463	1.51603	1.44374e-24	84.1059	1.32369	1.97073e-16	90.6581	1.1953	3.16429e-19	91.6995	1.34501	lipoxygenase homology domain-containing 1-like	0.652		unknown
CGI_10004125	1.68159	0.000225681	1090.93	1.18262	0.0121365	1275.59	1.14749	0.0128225	1280.07	1.33723	hypothetical protein CGI_10004125	1		unknown
CGI_10026103	1.11197	2.11744e-07	35.5653	2.15355	3.67098e-20	30.6642	0.714779	0.00156308	40.1043	1.32677	multiple epidermal growth factor-like domains 10	0.731		GO:0016020
CGI_10019199	0.606804	0.00769878	95.5152	1.95454	2.07064e-16	74.4095	1.40983	6.56439e-10	80.451	1.32372	Tripartite motif-containing 2	0.797		GO:0008270;GO:0005622;GO:0016567
CGI_10014618	1.10899	0.0236955	1.53518	1.43015	0.0026923	1.40603	1.42868	0.00284348	1.38118	1.3226	hypothetical protein CGI_10014618	0.9325		GO:0016021
CGI_10001637	1.62092	2.8331e-14	30.0367	1.17962	2.71394e-09	34.2182	1.16275	1.42242e-09	33.7663	1.3211	cell death abnormality 1-like	0.7735		GO:0016310;GO:0016301
CGI_10003759	0.590217	0.0253829	70.7944	2.57977	1.10414e-17	50.5349	0.786226	0.00266394	68.461	1.31874	cell death abnormality 1-like	0.6995		unknown
CGI_10027786	1.30764	1.12948e-09	85.3349	1.70119	2.39168e-16	82.5794	0.941473	9.25624e-06	94.7339	1.31677	Ras-related Rab-1A	0.805		GO:0005789;GO:0005525;GO:0006913;GO:0006888;GO:0007264;GO:0003924;GO:0008152;GO:0000139;GO:0006886
CGI_10018747	0.938908	0.0269881	7.54068	2.03652	7.32061e-07	6.28991	0.968265	0.0120406	7.84801	1.31456	polyenoic fatty acid isomerase-like	0.611		GO:0016491;GO:0055114
CGI_10028002	0.910528	0.0233587	166.321	1.1715	0.00506505	160.132	1.86006	1.51331e-06	139.453	1.31403	PREDICTED: uncharacterized protein LOC105325141 [Crassostrea gigas]	1		GO:0016021
CGI_10006347	1.06363	0.0104943	57.9995	1.22984	0.0016166	58.6349	1.64433	2.69709e-05	52.8523	1.3126	multiple epidermal growth factor-like domains 11	0.6135		GO:0004725;GO:0046872;GO:0016021;GO:0035335
CGI_10025883	1.34692	0.00390506	1.19699	1.1591	0.020977	1.39927	1.42819	0.00295142	1.22196	1.3114	hypothetical protein CGI_10025883	0.6507		unknown
CGI_10010885	0.786054	1.07807e-10	118.156	1.71155	1.98984e-34	100.992	1.42843	2.0806e-17	104.085	1.30868	Deoxycytidylate deaminase	0.872		GO:0008270;GO:0006220;GO:0004132
CGI_10003898	0.62118	0.0103683	74.6169	2.19593	2.91483e-19	56.6282	1.10507	1.02548e-06	67.3215	1.30739	multiple epidermal growth factor-like domains 10	0.8045		GO:0016021
CGI_10008303	0.785897	0.00413037	36.0608	1.37118	6.38484e-07	32.5971	1.74335	1.76172e-08	29.7173	1.30014	multiple epidermal growth factor-like domains 11	0.6595		unknown
CGI_10021134	0.969059	0.00644315	9.05577	1.50822	5.5124e-05	8.25118	1.41571	0.000164368	8.30032	1.29766	peptidyl-prolyl cis-trans isomerase FKBP14-like	0.985		unknown
CGI_10001231	1.01343	0.0300531	3.73985	1.63512	0.000436887	3.3165	1.24006	0.00771129	3.62618	1.2962	hypothetical protein CGI_10001232	1		unknown
CGI_10028249	0.799262	0.0185518	13.6565	1.39937	3.86704e-05	12.2934	1.68707	1.79203e-06	11.3531	1.29524	transcription factor PML	0.6385		GO:0003676
CGI_10018967	1.19179	9.31127e-13	67.1496	0.871228	8.27211e-09	75.4362	1.81997	4.03027e-27	61.1228	1.29433	Scavenger receptor class F member 2	0.7775		unknown
CGI_10000992	1.29746	0.000117049	13.2791	1.21784	0.000134012	14.2021	1.36002	1.98156e-05	13.481	1.29178	hypothetical protein CGI_10000992	1		unknown
CGI_10021293	1.81895	4.62446e-14	32.9313	1.52596	1.33759e-12	36.28	0.524948	0.006143	45.3095	1.28995	phosphatase mitochondrial	0.9733		GO:0004722;GO:0006470
CGI_10016577	1.0633	0.0223125	53.9164	1.04798	0.00697359	59.3276	1.74413	6.5871e-06	50.2252	1.28514	Angiopoietin-1 receptor	0.892		GO:0016021
CGI_10001378	1.26867	0.000165758	21.1811	0.896448	0.000401974	24.6125	1.68601	1.21688e-07	20.0836	1.28371	short-chain collagen C4-like	0.702		unknown
CGI_10014424	1.36476	0.00405658	1.85648	1.3796	0.0050295	1.99157	1.09639	0.0307388	2.12542	1.28025	THAP domain-containing 2	0.9356		GO:0003676;GO:0005634;GO:0006915
CGI_10016809	1.03346	0.0324366	6.30839	1.20522	0.0153357	6.07432	1.59806	0.000801567	5.62083	1.27891	hypothetical protein CGI_10016809	1		GO:0016021
CGI_10012897	1.25518	2.56526e-12	85.8378	1.54073	4.38416e-14	84.0743	1.03237	2.32461e-08	91.8735	1.27609	4-coumarate-- ligase-like 7	0.6335		GO:0008152;GO:0016874
CGI_10017906	1.37425	2.26185e-05	10.2469	1.47627	5.7632e-06	10.4707	0.970838	0.00227433	11.5871	1.27378	hypothetical protein CGI_10017906	0.6025		unknown
CGI_10022496	0.994086	3.33602e-07	71.0289	1.21549	1.06081e-08	70.1257	1.60277	4.65963e-14	63.8785	1.27078	biogenesis of lysosome-related organelles complex 1 subunit 3-like	0.895		unknown
CGI_10004460	1.08556	2.95314e-06	27.8667	2.19645	5.46239e-18	23.8246	0.517831	0.0108911	33.3234	1.26661	MNN4- partial	0.9738		GO:0003723;GO:0006364;GO:0008757;GO:0032259
CGI_10007018	1.23859	0.00729911	1.27463	1.22605	0.0123317	1.41632	1.33038	0.00522759	1.30123	1.26501	beta-1,3-galactosyltransferase brn-like [Crassostrea gigas]	0.6595		GO:0016021;GO:0006486;GO:0008378;GO:0005794
CGI_10000588	1.04882	0.000181997	32.6048	1.57759	1.36258e-13	30.7559	1.16597	1.30803e-07	32.8086	1.26413	Eukaryotic translation initiation factor 3 subunit D	0.6795		GO:0003743;GO:0070993;GO:0006413;GO:0005852
CGI_10027640	0.722347	0.0115876	4210.54	1.12723	1.60144e-06	3981.38	1.93941	2.43422e-10	3316.4	1.263	hypothetical protein CGI_10027640	0.83		GO:0016021
CGI_10003324	0.900071	0.000470458	33.0099	0.665864	0.0134474	36.5421	2.2075	4.90271e-15	26.3963	1.25781	[Nematostella vectensis]	0.526		unknown
CGI_10023821	1.36678	0.00219615	4.10181	1.1199	0.0112501	4.6494	1.28633	0.00409326	4.34104	1.25767	hypothetical protein CGI_10023821	0.78		unknown
CGI_10024041	1.30814	0.00353541	620.69	0.991411	0.0415729	689.231	1.46802	0.000945077	619.607	1.25586	Multiple epidermal growth factor-like domains 10	0.6665		unknown
CGI_10008524	0.919427	0.000429536	26.7123	1.33856	5.17261e-07	25.1683	1.5068	7.02926e-07	23.7584	1.25493	hypothetical protein CGI_10008524	1		unknown
CGI_10002342	1.44259	4.41553e-06	96.3928	1.07301	0.0002397	109.336	1.24172	1.25969e-05	103.602	1.25244	hypothetical protein CGI_10002342	1		unknown
CGI_10014308	1.06136	1.42663e-11	115.22	1.0683	1.09711e-07	119.254	1.61855	1.24148e-20	105.225	1.2494	serine threonine- kinase HT1-like [Nicotiana tabacum]	0.5515		GO:0005524;GO:0004672;GO:0006468
CGI_10003977	1.94904	5.8434e-24	118.716	0.622192	5.69193e-05	163.38	1.17534	5.94034e-24	140.495	1.24886	transcription intermediary factor 1-alpha-like	1		unknown
CGI_10015843	0.948901	2.30881e-07	51.8114	1.75892	3.93448e-23	45.8414	1.03163	4.82711e-11	52.0633	1.24648	Multiple epidermal growth factor-like domains 10	0.645		unknown
CGI_10000475	0.848388	5.95069e-09	173.012	0.338807	0.0327373	207.514	2.55179	1.43983e-66	132.555	1.24633	Aldose 1-epimerase	0.7815		GO:0005975;GO:0016021;GO:0030246;GO:0016853
CGI_10014698	0.715234	0.00256283	24.5385	0.813355	0.00114402	24.8216	2.19443	7.76911e-14	18.4786	1.24101	UPF0449 C19orf25 homolog	0.539		unknown
CGI_10020610	0.80482	0.0214527	19.2031	1.85196	2.85151e-08	16.0003	1.04599	0.0011293	18.5477	1.23426	hypothetical protein CGI_10020610	0.6317		unknown
CGI_10023841	1.30684	0.000717005	9.77945	1.17882	0.00288114	10.4906	1.20626	0.00161182	10.2896	1.23064	hypothetical protein CGI_10023841	0.885		unknown
CGI_10000812	0.827624	2.74214e-11	135.239	1.5391	9.83515e-33	120.588	1.3091	5.44282e-22	123.895	1.22528	iduronate 2-sulfatase-like	0.6685		GO:0008484;GO:0008152
CGI_10017382	1.70475	2.57956e-05	21.0294	0.624343	0.00615032	29.7419	1.33151	3.7903e-08	24.5135	1.2202	THAP domain-containing 9	0.6805		GO:0003676
CGI_10006775	1.24678	0.0102642	1.64611	1.21458	0.0152157	1.77672	1.19795	0.0170084	1.76293	1.21977	fibrinogen alpha chain-like	0.5964		unknown
CGI_10002222	1.73952	6.52308e-06	7.23452	1.09942	0.00218814	8.73915	0.818899	0.0323124	9.26277	1.21928	Tripartite motif-containing 38	0.747		GO:0008270;GO:0005622;GO:0016567
CGI_10013615	1.44928	3.57936e-06	14.5919	1.05187	0.00131092	16.5351	1.15618	0.000168539	15.9498	1.21911	hypothetical protein CGI_10013615	1		unknown
CGI_10025466	0.656506	0.00482288	46.6554	1.73015	7.88212e-16	38.3753	1.26596	1.0418e-09	41.1767	1.21754	multiple epidermal growth factor-like domains 6 isoform X1 [Crassostrea gigas]	0.7085		GO:0016021
CGI_10005631	0.556265	0.0298013	163.382	1.18343	5.09087e-08	145.132	1.91072	1.62468e-15	124.62	1.21681	meprin A subunit beta-like	0.8629		GO:0016491;GO:0016020;GO:0006508;GO:0055114;GO:0004222
CGI_10013557	1.94637	9.48311e-19	138.763	0.481324	0.0365363	198.831	1.19203	8.08078e-08	162.305	1.20657	Multiple epidermal growth factor-like domains 11	0.7383		GO:0008270
CGI_10012035	1.12745	0.0211698	2.33824	1.39104	0.00451874	2.29313	1.1008	0.0299327	2.52515	1.20643	Calmodulin 3	0.94		GO:0005509
CGI_10011459	1.06736	0.0305066	1.3446	1.27843	0.00929721	1.29626	1.2678	0.0101954	1.28732	1.20453	Tripartite motif-containing 2 [Crassostrea gigas]	0.685		GO:0008270;GO:0005622;GO:0016567
CGI_10019737	1.14751	0.00760744	309.742	0.942678	0.0390449	338.132	1.52246	0.000286169	293.711	1.20422	condensation domain [Leptospira fainei]	0.5827		GO:0006066;GO:0004026
CGI_10001583	0.663506	0.00322516	69.5453	1.00467	7.82455e-06	66.1197	1.92928	8.30472e-26	54.8872	1.19915	muscle M-line assembly unc-89-like	0.5925		unknown
CGI_10025073	0.612834	7.70336e-05	298.565	0.847906	3.07878e-13	292.461	2.13526	2.21245e-76	226.251	1.19867	GTPase IMAP family member 4-like	0.804		GO:0005525
CGI_10020576	0.487982	0.0467987	32.4739	0.780194	0.0015243	31.1081	2.31381	1.14494e-16	22.8207	1.194	hypothetical protein CGI_10020576	0.8567		unknown
CGI_10006296	1.03671	0.0277913	3.88238	1.12715	0.0172965	3.96403	1.41288	0.00282161	3.58357	1.19225	---NA---	0		unknown
CGI_10024660	0.962869	0.00339221	17.1513	1.24524	3.43121e-05	16.7756	1.36284	1.86595e-05	15.948	1.19032	hypothetical protein CGI_10024660	1		unknown
CGI_10020763	0.966419	5.63617e-08	47.1079	1.21133	1.76386e-11	46.3367	1.38678	3.27484e-13	43.9119	1.18818	hypothetical protein CGI_10020763	1		unknown
CGI_10009317	1.37274	1.80298e-07	159.693	0.893926	0.000831813	185.218	1.29537	7.03705e-07	165.871	1.18734	guanylate cyclase soluble subunit beta-2-like	0.7485		GO:0008074;GO:0000166;GO:0006182;GO:0016021;GO:0004383;GO:0005886;GO:0004016;GO:0035556;GO:0020037
CGI_10015931	1.14346	0.000645104	102.24	1.53954	4.20172e-07	98.6762	0.877499	0.0386524	109.014	1.18683	ADP-ribosylation factor 1	0.842		GO:0005525;GO:0007264;GO:0015031;GO:0005622
CGI_10003845	1.19907	2.98344e-26	896.675	1.73721	3.00326e-25	839.111	0.607606	1.9451e-07	1058.31	1.18129	COBW domain-containing 5	0.6855		unknown
CGI_10009617	0.660973	1.90055e-08	261.691	0.481005	4.83748e-08	286.056	2.40002	1.02185e-32	192.51	1.18067	Myeloid leukemia factor partial	0.6635		unknown
CGI_10005196	0.986196	6.79624e-13	127.099	1.29392	1.28026e-16	123.212	1.25986	3.13474e-24	122.431	1.17999	methyltransferase NSUN6	0.6235		GO:0003723;GO:0008168;GO:0032259
CGI_10019979	1.16855	0.00197614	7.5346	0.882118	0.01571	8.54071	1.47968	0.000122235	7.20485	1.17678	hypothetical protein CGI_10019979	1		unknown
CGI_10025733	1.0967	0.0241146	2.59695	1.32392	0.00632807	2.52891	1.10121	0.0244154	2.67035	1.17394	autophagy-related 3- partial	0.645		unknown
CGI_10002015	0.927056	2.12927e-05	141.397	1.60864	3.25635e-12	127.205	0.973239	6.28614e-06	142.959	1.16965	Kinesin heavy chain	0.7665		unknown
CGI_10003590	1.31328	1.24148e-17	266.915	0.577761	3.26877e-06	332.056	1.6168	1.42995e-47	258.694	1.16928	L-ascorbate oxidase	0.7865		GO:0005507;GO:0016491;GO:0055114
CGI_10020986	1.04423	4.90517e-07	47.4651	1.23753	2.81841e-09	47.2248	1.22017	2.10314e-07	46.2808	1.16731	Conodipine-M alpha chain	0.6425		GO:0016021
CGI_10013925	0.983981	1.76675e-06	253.818	1.09804	7.96246e-32	259.555	1.4166	2.14209e-43	238.794	1.16621	cis-aconitate decarboxylase	0.6855		GO:0008152;GO:0016829
CGI_10008795	1.44575	1.25118e-13	143.443	1.22938	1.40549e-11	155.953	0.821517	4.06931e-05	168.282	1.16555	hypothetical protein CGI_10008795	0.715		GO:0016021
CGI_10010499	0.800433	1.05037e-06	230.445	1.31142	2.07498e-25	213.638	1.37656	7.7112e-44	207.765	1.1628	Tripartite motif-containing 2	0.8195		GO:0008270;GO:0071203;GO:0016567
CGI_10017427	1.04983	0.00700271	7.03137	1.05841	0.0127864	7.1589	1.36507	0.000542469	6.65542	1.15777	A-kinase anchor 9	0.7405		GO:0008270;GO:0016310;GO:0016301;GO:0005622
CGI_10025286	1.08785	2.11883e-06	89.0493	0.839546	0.000277833	98.4136	1.54561	1.98534e-13	83.1878	1.15767	multiple epidermal growth factor-like domains 10	0.8295		GO:0016021
CGI_10017845	1.1031	0.0159841	1.01929	1.18448	0.0119367	1.0587	1.18455	0.0122419	1.04027	1.15738	multiple epidermal growth factor-like domains 10	0.5855		unknown
CGI_10017423	1.01563	0.000752402	190.353	1.79582	1.87351e-16	172.447	0.65135	0.00793495	216.494	1.15427	multiple epidermal growth factor-like domains 11	0.7975		GO:0016021
CGI_10001220	1.28466	2.37938e-06	74.1756	1.48443	4.01e-08	74.1667	0.689084	0.0124631	88.0273	1.15272	MAM domain-containing glycosylphosphatidylinositol anchor 1-like	0.754		GO:0008270;GO:0016020;GO:0005622;GO:0016787
CGI_10004292	1.13959	3.29842e-09	2117.28	1.08222	3.34593e-08	2228.16	1.23503	4.80568e-11	2119.05	1.15228	hypothetical protein CGI_10004292	0.7665		GO:0004531;GO:0006259
CGI_10002913	1.19868	6.26865e-12	6270.53	1.57412	1.06252e-23	6071.97	0.678799	3.56568e-06	7286.26	1.15053	nacre apextrin 1	0.5735		unknown
CGI_10011774	1.45207	8.07445e-10	166.805	0.840173	0.000601485	198.911	1.15722	8.89871e-08	181.723	1.14982	Solute carrier organic anion transporter family member 5A1	0.57		GO:0003824;GO:0044238;GO:0071704;GO:0006796
CGI_10008954	1.54663	1.27444e-09	55.4941	0.630872	0.000730367	71.9481	1.26895	1.80483e-09	60.4595	1.14882	PREDICTED: uncharacterized protein LOC105347288	0.9767		GO:0016021
CGI_10021641	1.32332	1.2181e-09	29.7418	0.693805	0.00428232	35.9187	1.42833	1.29978e-09	29.7494	1.14848	cholecystokinin receptor-like [Crassostrea gigas]	0.4933		GO:0004930;GO:0007186;GO:0016021
CGI_10027949	1.52466	8.77607e-08	33.0563	1.24762	1.25343e-05	36.4094	0.658154	0.0267277	41.4797	1.14348	ATP-binding cassette sub-family A member 3-like	0.7365		GO:0016887;GO:0005524;GO:0008152;GO:0016021;GO:0006810;GO:0005215
CGI_10018812	0.461704	0.018603	40.0748	1.19462	1.94574e-08	34.3872	1.75541	2.9951e-15	30.3711	1.13724	cell death abnormality 1-like	0.52		GO:0016021
CGI_10006116	1.29235	2.2936e-47	244.798	0.649132	7.83574e-08	295.705	1.4665	1.23245e-57	241.754	1.13599	Tripartite motif-containing 45	0.8615		GO:0005524;GO:0008270;GO:0016491;GO:0055114;GO:0005622;GO:0016567
CGI_10019957	0.687633	0.000877608	261.464	1.82254	1.40471e-23	214.397	0.894391	7.98826e-07	253.59	1.13485	zinc finger 235-like isoform X1 [Lingula anatina]	0.697		GO:0003676
CGI_10014224	1.23554	0.00112088	7.27987	1.23277	0.00132976	7.58238	0.924842	0.0122366	8.10987	1.13105	hypothetical protein CGI_10014224	0.8267		unknown
CGI_10002458	1.34356	3.71343e-34	744.308	1.42169	1.00393e-43	762.405	0.623036	2.46167e-07	900.292	1.12943	DNA-binding SMUBP-2	0.688		GO:0003677;GO:0005524;GO:0008270;GO:0003723;GO:0008026;GO:0006357;GO:0006412
CGI_10014426	1.03156	9.11792e-07	44.6873	1.14233	1.45063e-07	45.276	1.17409	1.10217e-07	44.0623	1.11599	programmed cell death 7-like	1		unknown
CGI_10001186	0.724116	0.00106839	46.6412	1.25787	3.79976e-09	42.5743	1.36573	3.34755e-08	40.8008	1.11591	Iduronate 2- partial	0.832		GO:0008484;GO:0008152
CGI_10006859	0.731769	0.0156997	123.7	0.87345	0.00600508	123.209	1.741	7.36682e-10	101.409	1.11541	Serum paraoxonase arylesterase 1	0.5165		GO:0016021
CGI_10012090	0.86236	2.94429e-11	190.372	1.42223	3.99266e-23	174.781	1.05456	1.31501e-13	185.519	1.11305	Tripartite motif-containing 2 [Crassostrea gigas]	0.7895		GO:0008270;GO:0016021;GO:0005622;GO:0016567
CGI_10014206	0.706686	0.000252711	151.986	2.18323	3.10536e-27	118.807	0.447184	0.037647	167.287	1.11237	[Nematostella vectensis]	0.681		GO:0050794;GO:0044424
CGI_10018427	1.29401	0.00369152	4.19383	1.00039	0.0250124	4.79638	1.027	0.0223912	4.64403	1.10713	cyclic AMP receptor A	0.7645		GO:0004930;GO:0007186;GO:0016021
CGI_10028807	1.17749	3.2952e-06	47.5108	1.08772	2.15949e-06	50.6157	1.05584	7.93357e-05	49.7573	1.10702	Fas ligand	0.5191		GO:0006955;GO:0016021;GO:0005164;GO:0043065;GO:0042981
CGI_10008027	1.2742	0.000340986	16.8022	0.841344	0.013944	19.5639	1.19824	0.00430508	17.0412	1.1046	ADP-ribosylation factor-like	0.8365		GO:0005525;GO:0007264;GO:0015031;GO:0005622
CGI_10009044	1.05237	0.000141739	20.8257	1.00112	0.000151434	22.0088	1.2559	3.14018e-05	20.3198	1.10313	slit isoform X1 [Nasonia vitripennis]	0.525		GO:0016021;GO:0008063
CGI_10009898	1.27066	0.00328292	5.8383	1.05734	0.0141166	6.51334	0.980216	0.0298802	6.48161	1.10274	Scavenger receptor class F member 2	0.736		unknown
CGI_10021355	0.550577	2.96166e-06	271.381	1.13273	1.00971e-28	243.93	1.62361	1.67807e-51	217.804	1.1023	receptor-type tyrosine- phosphatase T-like	0.68		GO:0004725;GO:0035335
CGI_10024139	1.26452	8.76278e-09	34.6659	0.970527	4.10814e-05	38.399	1.05387	2.08279e-06	37.1719	1.09631	hypothetical protein CGI_10024139	0.975		unknown
CGI_10014189	0.946713	0.0377046	172.155	1.0672	0.016883	174.689	1.2721	0.00523803	161.23	1.09534	aminergic-like G- coupled receptor [Branchiostoma floridae]	0.7021		GO:0004930;GO:0007186;GO:0016021
CGI_10021715	0.809298	5.91234e-06	186.764	1.74656	3.40484e-29	160.287	0.729422	1.79867e-06	195.054	1.09509	byssal -3	0.6529		unknown
CGI_10001112	1.28927	3.02932e-07	19.503	0.866534	0.0004162	22.3999	1.12908	4.32579e-06	20.6319	1.09496	autophagy-related 3- partial	0.6282		unknown
CGI_10003409	0.930865	0.00244142	73.0675	1.45109	1.74439e-07	67.9734	0.899646	0.00183875	75.4703	1.09387	Tripartite motif-containing 2	0.7735		GO:0008270;GO:0005622;GO:0016567
CGI_10027851	0.82468	6.00728e-06	144.017	1.32819	7.42719e-18	133.769	1.11481	3.707e-09	137.147	1.08923	hypothetical protein CGI_10027851	0.636		unknown
CGI_10018905	1.02874	4.68791e-10	92.9113	1.16729	6.24149e-15	93.7324	1.06136	4.1189e-11	94.2523	1.0858	hypothetical protein CGI_10018905	0.8825		unknown
CGI_10013161	1.32621	5.84311e-08	108.98	0.825197	0.000477064	127.582	1.09325	1.83557e-06	117.412	1.08155	mab-21 [Crassostrea gigas]	0.739		GO:0016021
CGI_10001428	1.13323	2.0036e-08	43.1429	1.54819	1.42904e-12	41.1638	0.547201	0.0106466	51.2792	1.07621	Complement C1q 2	0.788		unknown
CGI_10008187	1.0391	4.56064e-11	85.4439	0.554027	0.00137646	100.759	1.63175	5.86636e-25	77.4992	1.07496	Plasminogen	0.744		GO:0008270;GO:0004725;GO:0006508;GO:0016021;GO:0050878;GO:0004222;GO:0035335
CGI_10008150	1.03685	1.75545e-07	228.778	1.78047	3.17574e-37	207.595	0.407228	0.00228279	278.139	1.07485	Blastula protease 10	0.691		GO:0008270;GO:0016020;GO:0006508;GO:0004222
CGI_10012552	0.741546	1.14971e-05	206.376	0.859775	8.85453e-08	208.132	1.62114	6.23635e-23	174.153	1.07415	caspase-2 [Thamnophis sirtalis]	0.6135		GO:0006508;GO:0006915;GO:0004197
CGI_10020987	0.57828	0.0267628	142.887	1.10752	0.000662012	127.253	1.53187	4.2759e-10	116.421	1.07256	lens fiber membrane intrinsic -like [Crassostrea gigas]	0.9333		GO:0016021
CGI_10005872	0.445634	0.00603935	534.59	1.17107	2.1885e-21	462.207	1.5956	9.88516e-36	418.289	1.07077	hypothetical protein	0.6375		GO:0016579;GO:0004842;GO:0016043;GO:0044763;GO:0005488;GO:0050789;GO:0036459;GO:0016567
CGI_10021526	1.38464	4.07356e-05	10.1826	1.12177	0.000473575	11.2996	0.7057	0.0341225	12.3475	1.0707	Potassium voltage-gated channel Shab	0.656		GO:0005249;GO:0071805;GO:0008076;GO:0034765;GO:0051260
CGI_10016553	0.655011	3.528e-05	71.7403	1.26394	8.83193e-16	64.3626	1.29113	9.07674e-14	62.9566	1.07003	Rab5 GDP GTP exchange factor	0.9733		GO:0016021
CGI_10017287	1.0842	0.00138197	10.1903	1.21923	0.000422291	10.2275	0.904249	0.0155744	10.803	1.06923	hypothetical protein CGI_10017287	0.6155		GO:0016021
CGI_10008633	1.52809	1.97655e-11	100.157	0.494995	0.00667831	134.129	1.1845	4.59346e-11	110.377	1.06919	hypothetical protein CGI_10008633	0.686		GO:0016021
CGI_10007468	0.833516	0.0407314	685.866	0.810133	0.0379421	723.761	1.55197	5.33095e-05	594.728	1.06521	receptor-type tyrosine- phosphatase epsilon-like	0.6485		GO:0004725;GO:0046872;GO:0016021;GO:0035335
CGI_10011329	1.21452	3.94701e-09	123.971	0.737846	7.43085e-05	145.071	1.24196	1.54036e-10	126.064	1.06478	transcription factor PML	0.6		GO:0003676
CGI_10017489	0.970207	4.26094e-09	74.8057	1.82648	2.34228e-18	65.3245	0.397554	0.029602	89.3574	1.06475	[Nematostella vectensis]	0.6086		unknown
CGI_10010121	0.996864	4.74753e-07	121.223	1.15364	2.46465e-09	121.681	1.03796	1.46513e-07	122.693	1.06282	Histone-lysine N-methyltransferase SETD8-A	0.896		GO:0003676
CGI_10005020	1.93735	1.77991e-44	498.902	0.310486	0.0259128	747.281	0.932796	3.01358e-10	616.781	1.06021	Onco -induced transcript 3	0.6225		GO:0016021;GO:0005044;GO:0006898
CGI_10028605	1.01759	5.6181e-11	70.2565	1.17443	6.30398e-16	70.6255	0.988485	9.55188e-09	72.3094	1.06017	hypothetical protein CGI_10028605	0.7988		unknown
CGI_10022046	0.939947	4.53426e-05	42.6806	1.17493	5.4318e-07	41.9361	1.05817	2.11479e-06	42.3464	1.05768	receptor-type tyrosine- phosphatase T-like	0.654		GO:0004725;GO:0035335
CGI_10011268	0.913295	3.75777e-12	158.938	0.842876	1.36312e-11	168.001	1.40447	1.78813e-30	145.99	1.05355	integrin beta A	0.578		GO:0005509;GO:0016021
CGI_10004799	1.27196	6.14791e-11	261.157	1.14587	6.62419e-08	278.144	0.735999	0.000471511	302.503	1.05128	hypothetical protein CGI_10004799	0.8133		GO:0016021
CGI_10008188	1.04493	1.06331e-10	91.3376	0.530667	0.00162123	108.804	1.57274	7.01952e-17	83.6415	1.04945	Plasminogen	0.6995		GO:0008270;GO:0004725;GO:0016020;GO:0006508;GO:0004222;GO:0035335
CGI_10008955	1.07425	0.00069627	13.7489	0.971942	0.00226566	14.6418	1.10168	0.000608052	14.0108	1.04929	hypothetical protein CGI_10008955	0.92		GO:0016020
CGI_10015271	0.401931	0.0398584	75.7201	1.63961	4.22711e-19	58.6208	1.09911	2.42179e-09	64.1235	1.04688	apolipo L3-like	0.7936		GO:0004842;GO:0006869;GO:0008270;GO:0016021;GO:0008289;GO:0042157;GO:0005576;GO:0016567
CGI_10020159	1.25542	1.43195e-11	340.685	0.755929	2.13731e-05	398.953	1.12726	1.013e-09	357.68	1.0462	hypothetical protein CGI_10020159	0.7743		unknown
CGI_10000005	0.959255	0.041021	1.33967	1.04797	0.0301004	1.37861	1.11171	0.0167931	1.27767	1.03965	hypothetical protein CGI_10000005	0.6814		unknown
CGI_10000991	0.80883	0.00119296	23.7656	1.24152	1.24841e-06	22.1579	1.06633	4.70718e-05	22.6229	1.03889	hypothetical protein CGI_10000991	1		unknown
CGI_10006182	1.34802	7.84914e-15	57.9062	1.07287	5.67424e-11	63.854	0.694176	6.73571e-05	68.918	1.03835	prostamide prostaglandin F synthase-like	0.5635		unknown
CGI_10013911	1.57105	5.69601e-09	21.5598	1.01476	2.36517e-05	25.4049	0.5203	0.0392095	28.6102	1.03537	fucolectin- partial	0.8425		GO:0016021
CGI_10016423	1.29663	2.52067e-08	24.0084	0.734769	0.00199575	28.5517	1.07007	3.02722e-06	25.7978	1.03382	hypothetical protein CGI_10016423	0.8567		unknown
CGI_10027021	1.24165	1.10225e-06	30.3601	1.25104	5.06577e-05	31.1498	0.604335	0.0169773	36.5845	1.03234	multiple epidermal growth factor-like domains 10	0.7145		GO:0016020
CGI_10018904	1.01179	0.0255107	0.934442	1.09123	0.0194398	0.971383	0.991405	0.0429773	1.03031	1.03148	Retrovirus-related Pol poly from transposon	0.7733		unknown
CGI_10004034	0.868367	0.000297197	27.6278	0.672521	0.00275593	30.3833	1.53833	5.44591e-10	24.437	1.02641	subfamily C member 5	0.645		unknown
CGI_10017523	0.724654	3.13817e-07	320.064	0.917798	4.44835e-13	317.2	1.43625	1.45853e-13	276.753	1.02623	PREDICTED: uncharacterized protein LOC105335358	0.92		unknown
CGI_10026756	0.571064	0.00197411	262.315	1.07961	9.85776e-14	239.982	1.42285	4.63995e-24	219.608	1.02451	cyclin-D1-binding 1	0.6775		unknown
CGI_10022687	1.08754	1.97478e-10	74.2793	0.398075	0.0115739	92.7859	1.58349	9.34455e-23	68.8344	1.02304	Ubiquitin-like modifier-activating enzyme 1	0.9425		GO:0005524;GO:0016021;GO:0006464;GO:0008641
CGI_10012239	0.691855	0.0233305	27.0106	1.25131	1.37308e-06	24.5844	1.1251	0.000958292	24.3702	1.02276	Tyrosine- kinase receptor Tie-1	0.637		unknown
CGI_10008090	1.50407	1.03537e-05	13.3283	0.7524	0.0274954	16.7459	0.810636	0.0101807	16.2324	1.02237	tripartite motif-containing 2-like	0.5055		GO:0008270;GO:0005622;GO:0016567
CGI_10017305	0.877164	6.46518e-09	96.3512	1.09632	1.26703e-11	94.8758	1.09247	2.77596e-15	93.5971	1.02199	[Nematostella vectensis]	0.631		unknown
CGI_10012707	1.3759	9.07738e-06	198.836	0.808947	0.0311324	234.015	0.878284	0.00582777	228.346	1.02104	hypothetical protein CGI_10012707	0.71		GO:0016021
CGI_10018221	1.15443	3.71963e-15	103.322	0.662042	9.83038e-06	121.045	1.23836	1.49674e-20	103.67	1.01828	MIS12 homolog	0.5655		GO:0005634;GO:0007067;GO:0000775
CGI_10003960	0.315641	0.0347743	799.698	1.01234	3.41839e-08	683.86	1.71087	5.40433e-42	588.946	1.01295	von Willebrand factor type EGF and pentraxin domain-containing 1-like	0.497		GO:0005488
CGI_10003985	0.991454	0.0302531	2.11405	0.970293	0.0432996	2.26921	1.07576	0.027233	2.23878	1.0125	hypothetical protein CGI_10003985	0.945		unknown
CGI_10012106	1.16301	2.57987e-14	1830.83	0.582217	3.61849e-06	2204	1.29035	6.78322e-18	1820.55	1.01186	LIN-24 (Twenty-four) Like [Caenorhabditis elegans]	0.5525		unknown
CGI_10010545	0.592574	0.000407669	57.0708	1.69743	1.07554e-08	45.3296	0.742452	1.08213e-05	55.9595	1.01082	neuronal PAS domain-containing 4-like [Crassostrea gigas]	0.995		GO:0005634;GO:0006351;GO:0006355;GO:0046983
CGI_10011627	1.60225	1.2026e-21	66.2916	0.833908	1.16946e-06	81.1011	0.593548	0.000242628	85.0083	1.0099	serpin B6 [Pseudopodoces humilis]	0.656		GO:0005615;GO:0060255;GO:0048523;GO:0044424
CGI_10014855	1.18129	3.39549e-12	87.1013	1.03615	2.30553e-11	93.6265	0.798463	3.45879e-10	97.8596	1.0053	calpain-2 catalytic subunit-like [Aplysia californica]	0.536		GO:0005509;GO:0006508;GO:0004198;GO:0005622
CGI_10003581	1.56017	2.43463e-36	197.42	1.10571	5.64713e-12	223.833	0.343805	0.00585968	270.392	1.00323	acetyl- carboxylase- partial	0.8905		GO:0005524;GO:0003989;GO:0016021;GO:0006633
CGI_10021450	1.06357	4.84886e-24	171.922	0.47371	2.28528e-07	208.508	1.47168	1.78252e-35	161.532	1.00299	neurogenic locus notch homolog 2	0.663		GO:0050794;GO:0044707;GO:0005509;GO:0044464;GO:0044767
CGI_10027038	0.548771	0.0322586	47.6692	1.61527	1.59763e-09	38.3983	0.805435	0.00104303	45.3479	0.989826	hypothetical protein CGI_10027038	0.75		unknown
CGI_10020959	1.03446	1.06317e-08	204.79	0.459876	0.00018577	248.837	1.47413	2.33399e-35	191.915	0.989488	acetylcholine receptor subunit beta-like	0.677		GO:0034220;GO:0016021;GO:0005230
CGI_10009611	0.881661	0.0126211	34.5784	1.03298	7.46937e-07	35.6041	1.05354	1.71964e-07	34.8583	0.989393	RRP12	0.64		unknown
CGI_10005943	0.525927	0.00566755	53.1622	1.00986	3.8792e-08	48.6677	1.42406	1.50783e-12	43.7338	0.986617	hypothetical protein CGI_10003465	0.8933		unknown
CGI_10011068	0.760146	0.00255385	333.872	0.988015	2.14748e-05	327.924	1.20657	1.12956e-07	306.649	0.984909	myb SANT-like DNA-binding domain-containing 4	0.7929		unknown
CGI_10003614	0.637129	6.96446e-05	295.043	1.54791	2.95902e-54	250.969	0.750216	5.39267e-12	293.106	0.978418	A disintegrin and metallo ase with thrombospondin motifs 6-like	0.5745		unknown
CGI_10002506	1.12541	6.63146e-13	995.467	0.949574	8.01054e-10	1077.6	0.860006	2.11846e-08	1082.53	0.97833	phosphatidylinositol phosphatase PTPRQ-like	0.8667		unknown
CGI_10004218	0.730805	2.93864e-08	90.4275	1.1844	2.58731e-19	84.3968	1.01494	1.04581e-11	85.9083	0.976712	cystatin-A-like [Crassostrea gigas]	0.9029		unknown
CGI_10002731	0.58545	0.00259649	106.214	0.717481	0.000226337	106.265	1.62689	1.22633e-15	85.3186	0.976607	Methionyl-tRNA mitochondrial	0.736		GO:0005524;GO:0004825;GO:0005737;GO:0006431
CGI_10009244	0.946497	0.000451207	130.946	1.21803	6.2968e-06	127.674	0.757256	0.00539234	140.616	0.973927	hypothetical protein CGI_10009244	1		GO:0016021
CGI_10019889	1.48183	2.7288e-18	52.4393	0.608097	0.000412238	66.7965	0.830478	2.91763e-07	61.881	0.973469	lactosylceramide 4-alpha-galactosyltransferase-like	0.713		GO:0016020
CGI_10017733	0.642342	0.00124298	61.3102	1.71757	1.33869e-20	50.2835	0.559394	0.000166118	64.3031	0.973103	PREDICTED: uncharacterized protein LOC105332756 [Crassostrea gigas]	0.9		unknown
CGI_10016890	0.777803	0.0124629	18.4475	0.738446	0.0143069	19.4945	1.39951	5.2188e-06	16.2108	0.971919	growth hormone secretagogue receptor type 1 isoform X2 [Megachile rotundata]	0.63		GO:0007186;GO:0016021;GO:0048812;GO:0042654;GO:0009755
CGI_10017584	1.46578	2.77584e-40	288.698	0.755267	9.7619e-09	351.144	0.672583	1.21995e-07	352.888	0.964544	organic cation transporter -like	0.649		GO:0055085;GO:0022857;GO:0016021
CGI_10013865	1.36195	2.23873e-10	33.4226	0.590249	0.00278234	42.1026	0.940116	2.19426e-05	37.4819	0.964104	hypothetical protein CGI_10013865	0.805		unknown
CGI_10024035	0.718422	0.00364197	21.828	1.43473	9.39138e-08	19.0486	0.730403	0.00229794	22.2195	0.961187	hypothetical protein CGI_10024035	1		unknown
CGI_10012296	1.02043	8.94425e-13	201.508	0.773966	1.58557e-06	222.168	1.0848	6.00681e-14	202.74	0.959733	serine threonine- kinase 32B isoform X1 [Strongylocentrotus purpuratus]	0.688		GO:0005524;GO:0004674;GO:0006468;GO:0003697
CGI_10020360	0.579231	0.0261845	48.9724	1.21827	4.21402e-06	43.1102	1.07459	1.19109e-05	43.9071	0.957365	Tripartite motif-containing 2	0.6525		GO:0016567
CGI_10004774	0.678813	0.00955787	347.933	0.940451	4.40496e-06	339.876	1.24704	6.08156e-08	310.257	0.955435	Meprin A subunit alpha	0.6165		GO:0016491;GO:0046872;GO:0006508;GO:0016021;GO:0055114;GO:0004222
CGI_10028360	1.20505	2.8485e-18	241.95	1.33627	1.40293e-16	244.085	0.324468	0.0268638	311.241	0.955264	signal CUB and EGF-like domain-containing 1	0.6773		unknown
CGI_10009149	1.02237	0.0213999	18.193	0.910625	0.0372785	19.7752	0.931853	0.0340993	19.2896	0.95495	histone H1oo	0.631		GO:0005634;GO:0003677;GO:0000786;GO:0006334
CGI_10023249	1.19907	1.57274e-23	476.026	0.863051	3.21718e-13	534.944	0.794466	1.46419e-14	534.988	0.952195	potassium voltage-gated channel subfamily A member 10	0.621		GO:0005216;GO:0006811;GO:0016020;GO:0009987
CGI_10009656	0.52415	0.0437318	115.828	1.16013	1.32984e-06	102.048	1.16249	2.27498e-05	99.708	0.948925	Collagen alpha-5(VI) chain	0.68		GO:0006869;GO:0005581;GO:0005509;GO:0008289;GO:0042157;GO:0005576
CGI_10003930	0.857804	7.77307e-20	1557.81	1.06146	1.43806e-30	1542.85	0.926507	9.3921e-23	1564.19	0.94859	Protocadherin Fat 4	0.575		GO:0005509;GO:0016021;GO:0007156;GO:0005886
CGI_10002171	0.970057	0.00658828	70.049	0.895714	0.00630067	75.0127	0.975725	0.00308117	72.2435	0.947165	hypothetical protein CGI_10002171	0.7567		unknown
CGI_10007170	0.838113	1.37384e-09	76.6012	0.699076	1.27065e-06	82.5661	1.29083	8.35537e-15	70.445	0.942672	neuroglian-like isoform X1 [Crassostrea gigas]	0.6825		unknown
CGI_10012690	1.02453	0.000264693	20.6438	1.05675	0.00129402	21.0971	0.745996	0.00759799	22.7133	0.942426	Tripartite motif-containing 2	0.8965		GO:0005524;GO:0008270;GO:0042626;GO:0055085;GO:0008152;GO:0016021;GO:0005622;GO:0016567
CGI_10009866	1.01672	0.00118436	33.0357	0.582128	0.0307749	39.0616	1.22563	4.47507e-05	32.335	0.941493	prion-like-(Q N-rich) domain-bearing 25	0.661		unknown
CGI_10003356	0.955817	3.09506e-18	289.989	1.00687	5.07633e-28	297.99	0.860722	5.68202e-18	303.422	0.941137	hypothetical protein CGI_10003356	0.795		unknown
CGI_10018460	0.767845	6.32308e-05	54.5648	0.701862	0.000205176	57.6715	1.33932	2.2762e-13	48.8475	0.936342	MAM and LDL-receptor class A domain-containing 1-like	0.641		GO:0008270;GO:0005509;GO:0016020;GO:0006508;GO:0004222
CGI_10013854	1.60237	3.98136e-20	1215.07	0.499458	0.0104769	1631.49	0.705786	0.000497143	1509.92	0.93587	short-chain collagen C4-like	0.768		GO:0005581
CGI_10009473	1.10287	9.15039e-08	47.4613	0.460177	0.00336104	58.624	1.23662	4.26093e-13	47.3757	0.933222	meiotic recombination SPO11 isoform X1	0.7525		GO:0007131;GO:0007286;GO:0000737;GO:0007130;GO:0007141;GO:0000237;GO:0001541;GO:0000781;GO:0003677;GO:0005524;GO:0045141;GO:0005515;GO:0003824;GO:0048477;GO:0016021;GO:0034502
CGI_10006936	1.00755	3.53025e-26	551.189	0.75065	2.53226e-18	610.579	1.04082	1.03369e-40	559.065	0.933005	PREDICTED: uncharacterized protein LOC105343008 [Crassostrea gigas]	0.553		GO:0016021
CGI_10002329	0.784439	6.45907e-06	123.439	0.998337	1.65849e-14	122.027	0.999991	9.9521e-13	119.659	0.927589	multiple epidermal growth factor-like domains 10	0.675		GO:0016021
CGI_10005535	0.897608	2.82636e-07	222.805	0.658477	7.21368e-05	246.623	1.21834	5.81348e-14	211.511	0.92481	cytochrome P450 2C31-like isoform X1 [Crassostrea gigas]	0.6445		GO:0005506;GO:0016705;GO:0016021;GO:0055114;GO:0004497;GO:0020037
CGI_10007777	0.806007	0.00316422	26.4921	1.18503	4.53241e-05	24.9993	0.777203	0.00495768	27.2537	0.922746	Multiple epidermal growth factor-like domains 10	0.65		unknown
CGI_10009487	0.768599	2.2094e-07	114.245	0.446786	0.00365968	129.949	1.55061	2.48483e-22	98.286	0.921997	Tripartite motif-containing 2	0.7695		GO:0008270;GO:0005622;GO:0016567
CGI_10022608	0.858453	3.57895e-06	63.3412	0.666888	3.0581e-05	69.3081	1.23711	4.47424e-13	59.3099	0.920817	multiple epidermal growth factor-like domains 10	0.615		GO:0016021
CGI_10026168	0.99179	0.000230752	21.7513	0.807584	0.00179442	23.8407	0.962937	0.000163871	22.5208	0.920771	hypothetical protein CGI_10026168	0.655		unknown
CGI_10025982	0.824186	5.17403e-09	82.7959	0.892435	1.10565e-10	84.6071	1.04457	1.7212e-07	79.8218	0.920397	multiple epidermal growth factor-like domains 11	0.545		GO:0016021
CGI_10017791	0.837065	0.026501	33.2851	1.09647	0.000987362	32.7722	0.815636	0.018261	34.5861	0.91639	sodium-dependent excitatory amino acid transporter glt-6 [Crassostrea gigas]	0.863		GO:0006835;GO:0055085;GO:0017153;GO:0016021
CGI_10028563	0.724115	0.0282124	14.5147	0.678907	0.0415953	15.2582	1.34368	8.47873e-05	12.6583	0.915569	piggyBac transposable element-derived 4-like	0.7262		unknown
CGI_10002739	0.888405	0.0321493	7.26655	0.818425	0.0423175	7.77207	1.03824	0.0106245	7.19106	0.915023	caveolin-1-like [Crassostrea gigas]	0.7525		GO:0005901;GO:0070836;GO:0000139
CGI_10004505	0.942949	2.68589e-05	309.621	0.912098	3.26236e-05	324.493	0.883874	4.75429e-05	321.276	0.912974	flocculation FLO11-like	0.7006		GO:0016021
CGI_10012536	0.99726	9.0428e-22	352.654	1.11937	3.62555e-20	355.991	0.621192	1.03765e-11	396.534	0.912608	Multiple epidermal growth factor-like domains 6	0.673		GO:0016021;GO:0005488;GO:0009987
CGI_10025800	1.12482	7.16579e-09	47.5968	0.95597	9.71025e-08	51.5676	0.656701	1.57073e-05	54.9657	0.912498	hypothetical protein CGI_10025800	0.735		GO:0000166;GO:0003723;GO:0016021;GO:0006396
CGI_10016345	0.997753	0.00124279	234.391	0.662602	0.038642	266.964	1.0769	0.00242106	232.099	0.912417	Kin of irre partial	0.7364		GO:0016021
CGI_10001229	0.703823	4.51036e-08	165.163	1.14529	3.50033e-19	153.952	0.884407	1.25966e-06	160.183	0.911174	Alpha-mannosidase 2	0.6045		GO:0004559;GO:0008270;GO:0006013;GO:0030246
CGI_10003593	1.57542	1.49758e-114	1078.97	0.400042	3.24618e-09	1477.54	0.756485	2.09841e-20	1313.35	0.91065	calpain-2 catalytic subunit-like [Aplysia californica]	0.651		GO:0006508;GO:0004198;GO:0005622
CGI_10018441	0.835455	0.00400705	372.065	0.780604	0.00693711	392.702	1.10844	5.04078e-05	355.85	0.908168	cytochrome P450 2C31-like isoform X1 [Crassostrea gigas]	0.6745		GO:0005506;GO:0016705;GO:0016021;GO:0055114;GO:0004497;GO:0020037
CGI_10028676	0.615918	0.00584171	58.4866	0.736642	0.000237594	58.8696	1.37135	1.38457e-09	49.674	0.907971	hypothetical protein CGI_10028676	0.8433		unknown
CGI_10026194	0.968938	5.87428e-07	275.894	0.967167	2.52063e-06	286.437	0.777783	7.37648e-05	295.656	0.904629	Scavenger receptor class F member 2	0.8305		unknown
CGI_10014233	1.0889	2.29869e-13	132.425	0.617016	7.1561e-06	155.275	1.00677	7.37987e-17	138.142	0.904228	multiple epidermal growth factor-like domains 10	0.7		unknown
CGI_10002836	0.870325	5.15351e-10	110.044	0.677098	9.2073e-07	120.447	1.1641	3.00547e-14	104.942	0.903842	histone deacetylase 6 isoform X2	0.7205		GO:0008152;GO:0016787
CGI_10000717	1.26822	5.86305e-07	23.111	0.637567	0.00920317	28.1682	0.804448	0.00162055	26.4637	0.903413	Kin of IRRE 2	0.6029		unknown
CGI_10005022	1.05477	6.08837e-11	101.561	0.915237	9.51986e-09	109.006	0.734405	1.61359e-06	112.274	0.90147	uncharacterized oxidoreductase -like [Aplysia californica]	0.781		GO:0016491;GO:0055114
CGI_10005123	0.515337	0.0480238	21.7399	1.1525	1.19255e-05	19.047	1.03499	0.000209695	19.0942	0.900943	PREDICTED: uncharacterized protein LOC105329793 [Crassostrea gigas]	0.78		unknown
CGI_10003214	1.13884	3.63059e-10	124.843	0.488444	0.00355082	154.029	1.06774	1.00656e-12	130.104	0.898342	von Willebrand factor type EGF and pentraxin domain-containing 1-like isoform X2	0.99		GO:0005509;GO:0016021
CGI_10003044	0.780578	7.89944e-10	124.535	0.79825	1.76852e-11	128.955	1.11371	5.04055e-11	117.138	0.897512	F-box WD repeat-containing 5-like	0.5905		unknown
CGI_10006117	0.814279	0.0382857	16.5816	1.02606	0.0193285	15.9055	0.848269	0.0374633	16.7758	0.896203	Phosphatidylinositol-glycan-specific phospholipase D	0.7263		GO:0016021
CGI_10010927	0.814365	0.00343762	41.7522	0.660686	0.0220761	45.2298	1.19786	1.78008e-05	38.7819	0.89097	Cytochrome b-245 light chain	0.94		GO:0016021;GO:0020037
CGI_10018966	1.03924	2.6636e-07	79.9764	0.814983	5.46233e-05	87.8303	0.809594	5.90241e-05	86.5363	0.887937	Scavenger receptor class F member 2	0.816		unknown
CGI_10022374	0.487924	0.00550963	201.614	1.06183	9.60315e-14	180.504	1.11059	1.85789e-16	175.753	0.886785	PREDICTED: uncharacterized protein LOC105347287 isoform X2 [Crassostrea gigas]	0.985		GO:0016021
CGI_10006630	1.3337	6.63161e-15	139.58	0.477024	0.0265255	179.275	0.839553	4.48504e-08	159.979	0.883427	hypothetical protein CGI_10006630	0.8317		GO:0016021
CGI_10003482	0.940681	2.25153e-12	193.584	1.09688	4.44344e-22	194.469	0.612374	2.95796e-07	215.497	0.883313	tripartite motif-containing 45-like	0.6564		GO:0008270;GO:0005622;GO:0016567
CGI_10008302	0.804743	9.59622e-08	175.3	0.654496	1.08163e-07	189.849	1.18922	3.48997e-19	163.849	0.882821	Multiple epidermal growth factor-like domains 6	0.607		unknown
CGI_10014766	0.501513	0.0241848	27.697	0.629084	0.00507734	27.7279	1.51058	9.24836e-10	22.0778	0.880392	Fibronectin type III domain-containing 1	0.8015		unknown
CGI_10000555	0.690628	3.05051e-18	731.818	0.370363	4.65692e-05	833.685	1.57835	4.19929e-28	612.304	0.879782	Carboxy-terminal kinesin 2	0.7635		GO:0016887;GO:0005524;GO:0003777;GO:0008152;GO:0005871;GO:0007018;GO:0005874;GO:0008017
CGI_10018247	0.598857	0.0089199	146.531	1.36056	2.31293e-24	127.906	0.67943	3.91062e-08	147.519	0.879616	Tripartite motif-containing 2	0.709		GO:0016567
CGI_10003103	1.33958	5.5189e-33	191.208	0.753885	1.59775e-06	226.638	0.544608	1.25412e-05	236.211	0.879357	von Willebrand factor type EGF and pentraxin domain-containing 1	0.627		GO:0005509
CGI_10011215	0.682492	0.00880703	32.3639	1.03916	0.000970312	30.293	0.902419	0.0014104	31.1426	0.87469	hypothetical protein CGI_10011215	0.646		unknown
CGI_10013920	1.08165	1.44906e-33	221.159	0.656257	3.45876e-11	255.227	0.876388	1.47757e-18	237.083	0.871432	glyoxalase domain-containing 5	0.8285		unknown
CGI_10014307	0.881062	1.18356e-14	1140.13	0.990374	7.12137e-14	1153.24	0.740432	5.2468e-11	1207.23	0.870622	dual specificity kinase splB-like [Hydra vulgaris]	0.617		GO:0005524;GO:0004674;GO:0006468
CGI_10025415	1.14839	1.08432e-08	61.6592	0.745342	0.000361051	70.7118	0.717149	0.000209829	70.1014	0.870293	alpha-(1,3)-fucosyltransferase C-like [Biomphalaria glabrata]	0.698		GO:0008417;GO:0032580;GO:0036065;GO:0016021;GO:0006486
CGI_10010006	0.876489	0.000384876	25.3345	1.01314	0.000112059	25.2988	0.714413	0.00154056	27.1295	0.868013	Scavenger receptor class F member 2	0.847		GO:0016021
CGI_10008884	0.794128	1.27875e-12	246.955	0.5663	1.14825e-09	273.174	1.23843	2.87148e-31	227.483	0.866285	PREDICTED: uncharacterized protein LOC105319950	0.862		GO:0016021
CGI_10027115	0.566045	0.00743651	36.1186	1.09213	0.000321422	32.3252	0.934196	5.62613e-05	33.3117	0.864123	transcription factor PML	0.638		GO:0003676
CGI_10007434	0.854228	0.00516164	12.6066	0.824251	0.0137918	13.1084	0.913523	0.00290106	12.7095	0.864001	hypothetical protein CGI_10007434	1		GO:0016021
CGI_10002328	0.730674	5.7011e-08	319.849	0.880772	1.25299e-18	320.479	0.980216	7.84556e-27	307.681	0.863888	multiple epidermal growth factor-like domains 10	0.88		GO:0016021
CGI_10022022	1.04426	4.77797e-23	155.236	0.88455	5.09522e-15	167.451	0.659381	0.000222873	173.97	0.862729	Multiple epidermal growth factor-like domains 10	0.737		unknown
CGI_10014890	0.899137	1.95304e-06	156.134	0.911304	6.03742e-07	161.81	0.773062	1.92363e-05	164.841	0.861168	Ribulose-phosphate 3-epimerase	0.712		GO:0005975;GO:0016857;GO:0006098
CGI_10004349	0.687494	0.00383294	27.2173	1.33092	3.39951e-05	23.7462	0.558164	0.0315565	28.8834	0.858859	multiple epidermal growth factor-like domains 11	0.95		unknown
CGI_10011795	1.01983	3.23854e-09	53.3775	0.624109	0.000214238	61.4939	0.910006	5.41938e-07	55.871	0.851317	PREDICTED: uncharacterized protein LOC105334440 isoform X1 [Crassostrea gigas]	0.9675		GO:0016021
CGI_10028490	0.903744	1.59304e-05	162.995	0.621956	0.00274473	182.697	1.02788	7.47037e-08	161.854	0.851192	ankyrin-1-like isoform X2 [Biomphalaria glabrata]	0.6365		GO:0016310;GO:0016301
CGI_10014088	0.955243	4.21529e-07	41.8624	0.8163	9.41221e-06	45.0996	0.781172	1.93108e-05	44.676	0.850905	hypothetical protein CGI_10014088	0.832		unknown
CGI_10020955	0.691794	0.000667363	90.9261	1.33556	3.52394e-18	81.4432	0.517001	0.0123691	97.3508	0.848118	peripheral myelin 22-like [Crassostrea gigas]	0.6835		GO:0016021;GO:0005488;GO:0044237
CGI_10013879	0.876546	8.60462e-10	172.151	0.747086	1.01438e-07	184.902	0.912614	9.98514e-11	174.233	0.845415	vesicular glutamate transporter 2	0.623		GO:0055085;GO:0016021
CGI_10020645	0.504346	0.014523	35.7452	0.882404	0.000165756	33.1949	1.14737	9.67028e-08	30.7474	0.844705	RING finger 121-like	0.8795		GO:0008270;GO:0016021
CGI_10005494	0.614582	1.06373e-05	123.363	0.99937	9.2791e-14	116.242	0.919844	4.11124e-08	115.98	0.844599	Transmembrane 26	0.631		GO:0016021;GO:0016798
CGI_10006695	0.968794	0.00120087	383.536	0.778275	0.026199	415.91	0.785892	0.0283775	406.893	0.84432	prostaglandin E2 receptor EP4 subtype	0.5105		GO:0004930;GO:0007186;GO:0016021
CGI_10015794	0.972265	6.41086e-14	90.6806	0.672425	2.63731e-07	101.844	0.879679	4.86608e-11	94.8079	0.841456	retinol dehydrogenase 12-like	0.6705		GO:0016491;GO:0055114
CGI_10025438	0.924698	3.99426e-05	147.705	0.668709	0.00308107	164.496	0.917885	3.48648e-05	151.27	0.837097	von Willebrand factor type EGF and pentraxin domain-containing 1	0.7345		GO:0016021
CGI_10012806	0.767021	7.03307e-12	215.224	0.688253	1.68004e-11	228.616	1.05559	3.62602e-26	205.073	0.836954	thiamine-triphosphatase-like isoform X2	0.615		GO:0006725;GO:0006790;GO:0046872;GO:0006796;GO:0072527;GO:0016787
CGI_10005764	0.556759	4.0963e-05	142.047	0.879401	3.46255e-09	135.169	1.07338	1.74725e-13	126.87	0.836514	GDP-fucose O-fucosyltransferase 1	0.726		GO:0016757;GO:0008152
CGI_10024341	0.983753	8.77881e-20	149.951	0.853341	2.93258e-18	161.068	0.671514	4.59036e-12	165.765	0.836202	Peroxisome assembly 12	0.676		GO:0008270;GO:0005779;GO:0006625;GO:0008022
CGI_10005143	1.63266	6.20892e-14	71.392	0.471554	0.00780826	97.9249	0.400227	0.0482985	98.2917	0.834813	Ubiquitin carboxyl-terminal hydrolase 4	0.774		GO:0008270;GO:0042802;GO:0035520;GO:0005160;GO:0004197;GO:0007179;GO:0061649;GO:0060389;GO:0006511;GO:0004843;GO:0005634;GO:0046332;GO:0005737;GO:0030509;GO:0035616;GO:0034613
CGI_10016321	0.628932	0.00257543	46.9878	0.535308	0.0195979	50.0358	1.33961	7.15965e-08	40.0854	0.834616	hypothetical protein CGI_10016321	0.654		unknown
CGI_10001465	1.05305	1.36839e-10	152.186	0.921418	1.62769e-08	163.432	0.524529	0.000905604	178.692	0.832998	Tripartite motif-containing 3	0.8945		GO:0008270;GO:0005622;GO:0016567
CGI_10012664	0.700142	0.000158824	54.7129	0.527787	0.00908577	59.7013	1.27038	1.26122e-11	48.666	0.832771	plexin-A2-like isoform X3	0.801		GO:0008270;GO:0005509;GO:0016020;GO:0006508;GO:0004222
CGI_10019646	1.01755	4.53906e-08	47.2646	0.614571	0.00204443	54.4879	0.859947	4.62295e-07	50.2184	0.83069	Cohesin subunit SA-1	0.524		unknown
CGI_10022368	0.707442	0.000197455	103.08	0.838777	1.46342e-05	103.274	0.943411	1.13986e-08	99.215	0.829877	Scavenger receptor class F member 2	0.83		GO:0016310;GO:0016301
CGI_10006890	0.817768	0.0472597	14.1117	0.839544	0.0392503	14.7127	0.831008	0.0348658	14.5186	0.82944	PREDICTED: uncharacterized protein LOC105348204	0.5831		GO:0016021
CGI_10003019	1.00383	0.00243369	60.0959	0.772556	0.0312944	66.1754	0.707371	0.0424249	66.4376	0.82792	hypothetical protein CGI_10003019	0.706		unknown
CGI_10007491	0.772003	0.00254531	680.92	0.796283	0.00126552	703.864	0.914967	0.000128143	671.188	0.827751	hypothetical protein CGI_10007491	0.7833		GO:0016021
CGI_10010328	0.729327	7.85641e-08	78.5642	0.97299	3.49642e-10	76.7723	0.774713	4.98631e-09	79.307	0.825676	hypothetical protein CGI_10010328	1		unknown
CGI_10011194	0.762411	5.0402e-06	83.322	1.16684	1.99578e-15	78.8776	0.547645	0.000128018	90.4617	0.825632	Tripartite motif-containing 3	0.865		GO:0008270;GO:0071203;GO:0016567
CGI_10000740	0.89662	8.32096e-05	55.4058	0.728665	0.00383705	60.0324	0.850884	0.000315184	57.3489	0.82539	hypothetical protein CGI_10000740	0.6045		unknown
CGI_10027693	0.681029	1.74485e-10	328.494	0.995271	5.5568e-23	315.595	0.798023	1.84685e-12	325.026	0.824775	ABC transporter G family member 9	0.632		GO:0016887;GO:0005524;GO:0008152;GO:0016021
CGI_10028017	1.16444	5.93118e-08	46.5022	0.480345	0.0381302	57.9374	0.819475	5.87675e-06	51.827	0.82142	[Nematostella vectensis]	0.4955		GO:0016021
CGI_10010589	0.735541	0.000693472	367.497	0.548585	0.00556016	403.468	1.17674	2.09801e-08	337.056	0.820289	Carcinoembryonic antigen-related cell adhesion molecule 5	0.6855		unknown
CGI_10017275	0.826181	0.00411035	40.6492	0.688573	0.0245065	43.8182	0.942554	0.000859233	40.2257	0.819103	Multiple epidermal growth factor-like domains 10	0.7355		GO:0016021
CGI_10007545	0.635179	0.0209053	19.9716	0.965577	0.000535211	18.95	0.846981	0.00235811	19.1465	0.815913	multiple epidermal growth factor-like domains 10	0.804		GO:0008270;GO:0016020;GO:0005622
CGI_10010231	0.829902	2.17915e-05	151.564	1.00028	5.89941e-16	152.072	0.615965	3.68667e-09	165.044	0.815381	Acyl-coenzyme A thioesterase 13	0.7685		GO:0005634;GO:0005856;GO:0070062;GO:0051289;GO:0035338;GO:0005829;GO:0047617
CGI_10008925	0.925324	2.16043e-15	243.635	1.0057	1.99566e-12	248.003	0.509106	1.14811e-05	278.112	0.813375	Tripartite motif-containing 3	0.84		GO:0008270;GO:0005622;GO:0016567
CGI_10008366	0.911424	1.94476e-07	310.211	0.729846	8.90258e-07	338.632	0.794769	3.57801e-08	327.189	0.812013	ankyrin-1-like isoform X3	0.71		unknown
CGI_10000718	1.04771	4.18606e-05	21.1566	0.589667	0.0347398	24.7103	0.796826	0.00127905	23.0268	0.811402	cell adhesion molecule 2-like	0.644		unknown
CGI_10028499	0.926775	1.51598e-06	46.6427	0.694912	0.000509487	51.657	0.812472	6.01422e-06	49.2265	0.811387	hypothetical protein CGI_10028499	0.5933		unknown
CGI_10024023	0.695867	5.78677e-09	241.056	0.460177	0.000450225	267.898	1.27522	7.11309e-31	214.99	0.810421	serine threonine- phosphatase 6 regulatory ankyrin repeat subunit B-like	0.6995		unknown
CGI_10019287	1.08604	1.1337e-08	53.3975	0.789357	6.60246e-08	60.1747	0.547068	0.000214116	63.176	0.807487	Tripartite motif-containing 2	0.5845		GO:0016567
CGI_10023352	0.876898	5.01616e-05	649.349	0.590206	0.0141582	728.732	0.942453	2.02849e-06	654.035	0.803185	0	0		unknown
CGI_10027226	1.16668	1.95878e-11	44.0144	0.546324	0.00185806	53.4666	0.686297	2.599e-05	50.6635	0.799767	CUB and sushi domain-containing 3	0.4895		GO:0016021
CGI_10010116	0.676222	0.0015855	47.7851	0.999404	2.91103e-07	45.7848	0.710188	0.000210814	48.452	0.795272	hypothetical protein CGI_10010116	0.815		unknown
CGI_10015889	0.307623	0.00596313	797.457	1.60892	7.63301e-61	607.432	0.466688	0.00110672	775.175	0.794411	cornifelin homolog [Lingula anatina]	0.7135		unknown
CGI_10003212	0.67091	1.48716e-05	250.54	0.751201	1.35869e-09	255.258	0.959315	1.7617e-13	237.968	0.793808	Transforming acidic coiled-coil-containing partial	0.625		unknown
CGI_10021308	0.724872	0.000730874	39.8805	0.503088	0.0324948	44.1345	1.14402	5.85158e-07	36.6367	0.79066	hypothetical protein CGI_10021308	1		unknown
CGI_10007996	0.62973	0.0222951	18.3195	1.18348	5.70223e-05	16.4529	0.556455	0.0406643	19.1463	0.789889	multiple epidermal growth factor-like domains 10	0.5685		unknown
CGI_10019334	0.868482	3.56943e-09	175.369	0.805955	1.30497e-08	185.22	0.691813	3.89446e-06	187.696	0.78875	isoleucine--tRNA mitochondrial	0.6635		GO:0006428;GO:0005524;GO:0004822;GO:0006450;GO:0005739;GO:0002161
CGI_10002311	0.743675	0.000477345	1599.3	0.512887	0.012475	1776.31	1.10944	1.0332e-08	1494.43	0.788668	Transaldolase	0.8155		GO:0005975;GO:0004801;GO:0005737;GO:0006098;GO:0043227
CGI_10020476	1.03974	9.62691e-21	117.946	0.668519	2.14178e-10	134.334	0.650448	9.27066e-09	132.71	0.786235	DNA replication complex GINS PSF1	0.863		GO:0032508;GO:0000811;GO:1902983;GO:0043138
CGI_10003674	0.65867	0.000448032	57.8974	0.601492	5.78542e-05	61.3544	1.0975	4.57227e-11	53.1083	0.785888	multiple epidermal growth factor-like domains 10	0.6845		GO:0016021
CGI_10007301	0.86082	0.00128415	32.5367	0.867019	0.00251884	33.638	0.621173	0.0230012	35.5399	0.783004	multiple epidermal growth factor-like domains 10	0.708		unknown
CGI_10020352	0.887918	5.87397e-07	389.191	0.903573	1.21513e-12	404.682	0.549934	9.5416e-05	436.375	0.780475	AGAP002739-PA [Anopheles gambiae PEST]	0.603		GO:0005509
CGI_10024712	0.555899	0.00202849	90.2729	0.726039	1.60088e-06	89.6558	1.05858	1.95999e-13	81.0395	0.780173	glucose dehydrogenase [ quinone]-like [Crassostrea gigas]	0.7995		GO:0016614;GO:0050660;GO:0016020;GO:0055114
CGI_10012634	1.03455	1.11898e-08	126.799	0.864817	7.19824e-10	137.901	0.43234	0.0038696	152.529	0.777234	PREDICTED: uncharacterized protein LOC105320692 [Crassostrea gigas]	0.6933		GO:0003824;GO:0008152;GO:0016021
CGI_10000318	0.843597	0.00815656	18.8308	0.624808	0.0281336	20.984	0.848064	0.00340882	19.3182	0.772156	autophagy-related 3- partial	0.7405		unknown
CGI_10022567	0.877856	1.57578e-11	329.563	0.759849	2.12847e-09	352.946	0.677566	3.3092e-07	354.495	0.771757	PGAP2-interacting isoform X1	0.6695		GO:0016021
CGI_10027610	0.778245	3.14691e-15	225.091	0.80985	5.89485e-15	232.203	0.7262	1.39773e-12	233.022	0.771431	PR domain zinc finger 4	0.531		GO:0003676;GO:0046872;GO:0044424
CGI_10012882	0.588767	0.00695007	69.5495	0.684322	0.0215712	69.6672	1.03923	2.15025e-06	63.0105	0.770772	Transmembrane 2	0.6313		GO:0016021
CGI_10004350	0.698641	0.00039378	33.3956	0.696886	0.000420592	34.7518	0.91459	1.28888e-05	32.2371	0.770039	multiple epidermal growth factor-like domains 11	1		unknown
CGI_10028283	0.485334	0.000173701	465.7	0.881949	9.8695e-21	435.579	0.939727	1.80796e-14	421.105	0.769003	Receptor-type tyrosine- phosphatase T	0.747		GO:0003735;GO:0006471;GO:0004725;GO:0005840;GO:0035335;GO:0003950;GO:0006412
CGI_10023891	0.551443	0.00494654	95.0544	0.758885	2.24194e-05	93.3576	0.995618	6.88963e-09	86.4366	0.768649	cyclin-dependent kinase 7	0.873		GO:0051301;GO:0005524;GO:0008353;GO:0006468
CGI_10017563	0.393314	0.00024093	241.748	1.02798	1.36957e-11	211.615	0.878684	7.77671e-25	216.196	0.766659	transmembrane 19 [Alligator mississippiensis]	0.7475		GO:0016021
CGI_10005884	0.941263	0.000206191	87.4831	0.535337	0.0309098	101.923	0.817879	0.000450742	92.6637	0.764826	toll-like receptor 3 isoform X1 [Crassostrea gigas]	0.8367		GO:0016021
CGI_10007567	0.646358	0.00798632	924.414	0.605556	0.0123168	972.363	1.04171	1.8654e-05	850.803	0.764541	Receptor-type tyrosine- phosphatase mu	0.6525		GO:0004725;GO:0035335
CGI_10013597	0.721708	1.33395e-05	104.889	1.23323	1.86447e-20	96.7981	0.338004	0.00327782	120.074	0.764315	multiple epidermal growth factor-like domains 10 isoform X2 [Crassostrea gigas]	0.541		GO:0016021
CGI_10019642	0.950141	2.65358e-25	252.033	0.749469	2.03236e-18	275.565	0.587277	1.69821e-10	282.677	0.762295	vesicle transport USE1 isoform X1	0.6355		GO:0016021
CGI_10018413	1.12961	4.30742e-08	247.06	0.543992	0.00887644	298.878	0.610621	0.00395872	287.908	0.761407	---NA---	0		unknown
CGI_10022452	0.631197	3.5444e-07	334.195	0.540812	0.000273958	355.808	1.11196	1.92273e-13	302.09	0.761324	Small nuclear ribonucleo E [Salmo salar]	0.9455		GO:0005682;GO:0005686;GO:0005685;GO:0005687;GO:0000387;GO:0034715;GO:0003723;GO:0034709;GO:0071011;GO:0034719;GO:0046540;GO:0005829;GO:0019013
CGI_10016320	0.403064	0.0198826	65.2314	0.547873	0.00138548	65.0052	1.32735	2.11279e-11	52.4558	0.759428	hypothetical protein CGI_10016320	0.7233		unknown
CGI_10022047	0.730899	0.0102708	24.7394	0.856688	0.00210004	24.83	0.683314	0.0286927	25.4172	0.756967	multiple epidermal growth factor-like domains 10	0.664		GO:0016021
CGI_10013831	0.864059	1.64837e-11	105.778	0.659788	3.37737e-08	115.983	0.739022	6.80615e-11	111.557	0.75429	N-acetylglucosamine-1-phosphodiester alpha-N-acetylglucosaminidase-like	0.614		GO:0016021
CGI_10008186	0.735567	0.00143696	87.7516	0.747907	6.34896e-07	91.6337	0.776244	5.65167e-05	89.0347	0.753239	blastula protease 10- partial	0.8609		GO:0008270;GO:0016020;GO:0006508;GO:0004222
CGI_10009755	0.312936	0.0275696	110.692	1.46705	7.56648e-21	86.4025	0.476672	0.00100993	107.405	0.752221	neuroglian-like isoform X1 [Biomphalaria glabrata]	0.5922		GO:0016021
CGI_10022393	1.14171	9.43668e-08	70.5172	0.460646	0.0420579	87.6567	0.651581	0.0185999	81.0278	0.751311	Multiple epidermal growth factor-like domains 6	0.7538		GO:0016021
CGI_10018829	1.29485	2.54741e-35	393.952	0.7036	3.37288e-07	469.371	0.255065	0.0159033	526.754	0.751172	von Willebrand factor type EGF and pentraxin domain-containing 1 isoform X2	0.596		GO:0005509
CGI_10002982	1.08251	5.16478e-16	416.478	0.86669	7.14659e-15	456.52	0.302819	0.0213765	525.269	0.750672	fatty acid hydroxylase domain-containing 2	0.714		GO:0005506;GO:0016491;GO:0016021;GO:0055114;GO:0006633
CGI_10025377	0.915122	5.25901e-05	27.389	0.841894	8.12757e-05	29.0338	0.48998	0.0375834	31.6319	0.748999	UDP-N-acetylglucosamine--dolichyl-phosphate N-acetylglucosaminephosphotransferase	0.7515		GO:0005789;GO:0003975;GO:0016021;GO:0006047;GO:0006487;GO:0019348;GO:0008963
CGI_10022098	0.769818	0.000282715	56.0931	0.710313	0.000419333	59.3715	0.765845	9.68172e-05	57.5254	0.748658	ankyrin repeat domain-containing 49-like	0.7125		GO:0016310;GO:0016301
CGI_10003253	0.805831	7.42988e-16	197.483	0.640883	2.21545e-09	214.224	0.793659	1.17705e-17	202.264	0.746791	Transcription intermediary factor 1-beta	0.8175		GO:0008270;GO:0005622
CGI_10024419	0.789044	0.00133631	274.561	0.810128	1.28708e-06	286.397	0.624096	1.47162e-06	296.472	0.741089	von Willebrand factor A domain-containing 5A	0.59		unknown
CGI_10024063	0.778324	2.52691e-07	115.637	0.671032	2.81185e-05	123.456	0.771067	5.55143e-08	118.271	0.740141	Rho-related racA	0.7175		GO:0005525;GO:0007264;GO:0016020;GO:0015031;GO:0005622
CGI_10019718	0.688013	0.000364622	600.281	0.752884	5.06983e-06	614.748	0.779044	1.183e-05	599.246	0.73998	[Micromonas commoda]	0.6465		GO:0046872
CGI_10000912	0.660339	9.92287e-06	100.162	0.812381	6.86437e-10	99.9886	0.747172	1.20732e-08	99.8907	0.739964	Uncharacterized protein C3orf59	0.666		unknown
CGI_10023738	0.530822	1.41528e-05	1579.39	1.21391	4.02964e-20	1383.62	0.46163	0.00015225	1645.37	0.735454	cyclin-I-like [Octopus bimaculoides]	0.7315		GO:0051726
CGI_10017639	0.940937	0.000102196	110.357	0.732337	0.000363579	121.764	0.530079	0.02825	126.313	0.734451	serine protease inhibitor dipetalogastin-like	0.9833		GO:0006508;GO:0008233
CGI_10001389	0.839431	0.00669024	586.424	0.506345	9.79969e-05	682.057	0.850509	7.0167e-09	609.907	0.732095	hypothetical protein CGI_10001389	0.5525		unknown
CGI_10006909	0.885093	7.52286e-21	362.952	0.558273	1.40704e-09	411.414	0.744916	3.55346e-15	383.975	0.729427	hypothetical protein CGI_10006909	0.7483		unknown
CGI_10020737	0.61145	1.43402e-06	165.097	0.969169	7.00785e-18	156.643	0.600646	7.2921e-08	169.244	0.727088	Cubilin	0.458		GO:0005515;GO:0043231;GO:0016021;GO:0012505;GO:0031982;GO:0044444;GO:0044699;GO:0098805;GO:0071702
CGI_10011453	0.83841	0.00236743	23.5647	0.583256	0.0253668	26.433	0.758097	0.0014612	24.7575	0.726588	hypothetical protein CGI_10011453	0.85		unknown
CGI_10015098	0.669023	1.10793e-11	223.808	0.946208	8.22239e-27	216.904	0.563485	4.3137e-09	235.393	0.726238	Arrestin domain-containing 2	0.8625		GO:0008270;GO:0005622
CGI_10025309	1.2369	3.36818e-07	174.244	0.435814	0.0222446	224.693	0.504908	0.00317003	216.286	0.725874	sulfotransferase family cytosolic 1B member 1-like [Crassostrea gigas]	0.642		GO:0008152;GO:0008146
CGI_10009683	0.815813	1.0269e-09	100.889	0.658392	2.1416e-06	109.144	0.70261	3.65697e-08	106.2	0.725605	methyltransferase 9 isoform X2	0.7215		GO:0005515
CGI_10014738	0.669216	0.021488	255.96	0.715765	0.00903759	263.048	0.789311	0.00459609	253.021	0.724764	PI-PLC X domain-containing 3-like	0.549		GO:0006629;GO:0008081
CGI_10012023	0.787007	3.00047e-06	575.216	0.608805	0.000237666	627.445	0.776071	5.83324e-07	589.621	0.723961	odd-skipped-related 1	0.693		GO:0061004;GO:0006355;GO:0048523;GO:0005488;GO:0061005;GO:0048518;GO:0072171;GO:0048562;GO:0030326;GO:0072075;GO:0045595;GO:0048863;GO:0072498;GO:0072358;GO:0039019;GO:2000026
CGI_10028790	0.344869	0.000519447	268.17	0.705175	1.13441e-12	251.402	1.12119	9.5309e-24	222.765	0.723744	Tripartite motif-containing 2	0.8145		GO:0008270;GO:0071203;GO:0016567
CGI_10015874	0.743726	0.000125619	129.882	0.767656	4.32059e-06	134.501	0.657396	0.000207127	136.161	0.722926	cytochrome P450 10-like	0.6		GO:0005506;GO:0016705;GO:0055114;GO:0004497;GO:0020037
CGI_10011425	0.910798	0.00140863	15.6886	0.683897	0.0188316	17.4645	0.560994	0.0366285	17.7965	0.718563	prostaglandin F2-alpha receptor-like	0.8267		GO:0016021
CGI_10022086	0.850625	2.70484e-05	32.6996	0.551402	0.00980083	36.8102	0.740277	0.000283855	34.3582	0.714101	phosphatase mitochondrial	0.756		GO:0004722;GO:0006470;GO:0043169
CGI_10006079	0.628184	1.943e-06	190.185	0.82004	8.12945e-12	187.857	0.693615	1.60434e-09	190.964	0.713946	multiple epidermal growth factor-like domains 10	0.574		GO:0016021
CGI_10022375	0.5498	0.0256239	34.2155	0.94665	1.98202e-05	32.022	0.641825	0.00315459	34.1704	0.712758	hypothetical protein CGI_10022375	1		GO:0016021
CGI_10013984	0.662462	9.94898e-13	2770.45	0.763776	6.99415e-16	2802.92	0.709884	1.19441e-12	2792.43	0.71204	virilizer homolog	0.667		unknown
CGI_10004213	0.744265	0.00525474	20.7287	0.611526	0.0141015	22.4162	0.779716	0.002732	20.9973	0.711836	hypothetical protein CGI_10004213	1		unknown
CGI_10026006	0.455353	0.0276311	271.138	0.689882	7.59331e-07	264.64	0.981784	1.40422e-12	241.35	0.709006	hypothetical protein CGI_10026006	0.92		unknown
CGI_10004661	0.826404	4.51822e-08	86.3567	0.485694	0.000154425	98.7476	0.804512	5.33407e-10	88.8186	0.705537	Receptor-type tyrosine- phosphatase T	0.684		GO:0004725;GO:0016021;GO:0035335
CGI_10020712	0.604802	4.58789e-11	565.801	0.690794	1.37773e-14	574.295	0.820946	9.00295e-23	545.567	0.705514	dehydrogenase reductase SDR family member 1-like	0.7435		GO:0016491;GO:0043231;GO:0055114;GO:0044444
CGI_10014351	0.429333	0.0144516	110.572	1.26267	2.21422e-17	93.1084	0.418373	0.000756071	113.636	0.70346	Arrestin domain-containing 2	0.8575		GO:0008270;GO:0005622
CGI_10003580	0.652653	2.86147e-09	198.955	0.956275	4.05785e-19	191.494	0.500905	4.58182e-06	212.203	0.703278	Arrestin domain-containing 2	0.855		GO:0008270;GO:0005622
CGI_10002425	0.799115	6.07724e-06	64.1208	0.493056	0.000677934	72.7583	0.815904	2.63148e-06	65.2024	0.702691	hypothetical protein CGI_10002425	1		unknown
CGI_10013176	0.621503	0.00111479	8105.24	0.848991	3.04117e-06	7926.65	0.627392	0.000884999	8261.96	0.699295	gelsolin 2	0.6885		unknown
CGI_10011457	0.623975	9.23263e-07	210.674	0.853605	2.00849e-11	206.144	0.614597	0.000367486	215.292	0.697392	[Nematostella vectensis]	0.5045		GO:0016021
CGI_10014262	0.911013	1.35441e-07	69.5678	0.514093	0.000388236	80.5176	0.665036	6.41048e-06	75.919	0.696714	cholecystokinin receptor type A-like [Crassostrea gigas]	0.503		GO:0004930;GO:0007186;GO:0016021
CGI_10000774	0.237989	0.0252759	158.824	0.953413	6.5759e-20	135.227	0.898203	1.64224e-18	134.577	0.696535	ATP synthase subunits region ORF 7	0.686		GO:0009260;GO:0007155;GO:0009201;GO:0030246;GO:0042455
CGI_10022466	1.06561	1.42178e-10	154.117	0.355411	0.0456462	194.4	0.666825	2.88899e-07	174.664	0.695949	nidogen and EGF-like domain-containing 1	0.8125		GO:0007160;GO:0016021
CGI_10005082	1.10072	2.62878e-08	317.152	0.57775	0.000730367	378.194	0.399517	0.0434327	391.456	0.692663	peripheral myelin 22-like [Crassostrea gigas]	0.5358		GO:0005923;GO:0016021;GO:0005198
CGI_10013443	0.644024	0.000522012	72.5216	0.875932	5.35725e-06	70.7513	0.556455	0.00289816	75.8837	0.692137	proton-coupled folate transporter-like	0.609		GO:0055085;GO:0016021
CGI_10006392	0.879038	8.67878e-08	47.0929	0.669744	6.78297e-05	51.6759	0.524401	0.00332822	52.9318	0.691061	Tripartite motif-containing 56 [Crassostrea gigas]	0.46		GO:0008270;GO:0005622;GO:0016567
CGI_10010393	0.726906	1.45837e-05	619.578	0.937391	5.88675e-09	610.671	0.407971	0.0152603	693.574	0.690756	Golgi-associated plant pathogenesis-related 1 [Esox lucius]	0.6615		GO:0005576
CGI_10025395	0.635667	4.97697e-23	443.362	0.865655	1.44895e-39	434.097	0.568953	1.41447e-12	461.077	0.690092	RNA polymerase II-associated 1	0.5575		unknown
CGI_10011123	0.539979	1.56916e-05	936.51	0.553123	0.00454011	965.982	0.975466	9.72799e-17	853.564	0.689523	neutral and basic amino acid transport rBAT-like	0.6485		GO:0005975;GO:0003824;GO:0016021;GO:0043169
CGI_10008107	0.680742	0.00152265	32.0524	0.846727	7.15964e-05	31.9146	0.539957	0.00693079	34.1762	0.689142	brain-specific homeobox homolog	0.6965		GO:0005634;GO:0006355;GO:0043565
CGI_10002585	0.544291	3.07845e-08	505.692	1.05909	4.41636e-32	460.933	0.460502	0.0100706	527.215	0.687962	protocadherin Fat 4-like	0.663		GO:0005509;GO:0016021;GO:0007156
CGI_10010394	0.622846	0.000818443	120.578	0.743454	1.08386e-05	121.353	0.688346	5.63355e-05	120.933	0.684882	Ectonucleotide pyrophosphatase phosphodiesterase family member 6	0.6365		GO:0003824;GO:0008152
CGI_10010186	0.87087	1.49917e-12	227.388	0.682356	2.17021e-12	248.433	0.497243	8.30637e-06	256.75	0.68349	zinc finger Ran-binding domain-containing 2-like isoform X1	0.7845		GO:0003700;GO:0008270;GO:0008380;GO:0005515;GO:0006355;GO:0005654;GO:0044822
CGI_10017136	0.432677	0.000326027	137.433	0.76507	1.4108e-07	129.727	0.851762	1.67801e-09	124.75	0.68317	Beta-1,4-N-acetylgalactosaminyltransferase bre-4	0.785		GO:0005975;GO:0016757;GO:0016021
CGI_10016460	0.485941	0.0169022	55.2399	0.661247	3.89709e-05	54.7846	0.901137	1.29856e-08	50.6352	0.682775	voltage-dependent calcium channel subunit alpha-2 delta-2-like	0.8545		GO:0003677;GO:0003713;GO:0016021;GO:0006355
CGI_10015228	1.02203	5.57581e-10	58.7285	0.531312	0.00130457	69.6218	0.492564	0.000692405	69.109	0.681968	[Nematostella vectensis]	0.5779		GO:0005509
CGI_10000692	1.33272	8.50824e-25	189.264	0.485721	0.00181861	242.126	0.226263	0.0149935	258.245	0.681569	Tripartite motif-containing 3	0.9165		GO:0008270;GO:0008152;GO:0016740;GO:0005622;GO:0016567
CGI_10002266	0.781062	1.96011e-17	350.188	0.830586	3.8075e-14	359.216	0.427159	3.9953e-06	394.642	0.679603	Tripartite motif-containing 3	0.9045		GO:0008270;GO:0005622
CGI_10008529	0.601193	1.86435e-05	75.791	0.718466	1.21441e-07	76.2689	0.70156	1.62268e-07	75.2869	0.67374	Tripartite motif-containing 2	0.4585		GO:0008270;GO:0005622;GO:0016567
CGI_10024051	0.362101	0.0172888	129.1	0.576581	0.000150308	125.703	1.08025	2.1852e-13	108.764	0.672979	condensin-2 complex subunit G2 isoform X2 [Rattus norvegicus]	0.6215		GO:0005634;GO:0005515;GO:0001833
CGI_10020245	0.571534	0.0150251	57.9822	0.697298	0.00167645	58.1503	0.749621	0.000864549	56.2926	0.672817	Sodium potassium calcium exchanger 3	0.7545		GO:0005887;GO:0030955;GO:0005262;GO:0005509;GO:0008273;GO:0070588;GO:0035725;GO:0031402;GO:0006874
CGI_10006706	0.558976	9.04639e-10	189.107	0.486859	6.47252e-06	200.592	0.968964	2.92212e-26	173.884	0.6716	Tripartite motif-containing 2	0.873		GO:0008270;GO:0005622;GO:0016567
CGI_10012020	0.307604	0.00257571	502.187	1.08703	4.89981e-32	423.964	0.613138	2.27185e-08	468.477	0.669258	Ankyrin-1	0.6855		unknown
CGI_10027936	0.511119	0.00739336	42.2578	0.732765	0.000146984	41.2806	0.762682	6.77198e-05	40.3012	0.668856	PREDICTED: uncharacterized protein LOC105347947 [Crassostrea gigas]	1		GO:0016021
CGI_10021303	0.621418	0.00318457	85.4268	0.863711	3.13065e-08	83.6834	0.517238	0.0023483	90.1792	0.667456	Tripartite motif-containing 2 [Crassostrea gigas]	0.8955		GO:0008270;GO:0071203;GO:0016567
CGI_10008676	0.66571	2.47107e-05	181.84	0.666866	1.02987e-08	189.527	0.662035	8.46799e-08	186.43	0.66487	Receptor-type tyrosine- phosphatase T	0.696		GO:0004725;GO:0016021;GO:0035335
CGI_10000134	0.526915	0.000565754	4089.55	1.01271	1.28556e-14	3748.84	0.452741	2.1496e-05	4275.99	0.664122	nacre apextrin 1	0.729		unknown
CGI_10003628	0.807638	2.75123e-09	4448.71	0.599906	7.23343e-06	4888.22	0.576365	1.39087e-05	4835.1	0.661303	gelsolin 2	0.776		GO:0003779
CGI_10004861	0.609761	3.08959e-05	324.12	0.933249	1.52047e-12	309.941	0.44045	0.00126171	347.974	0.661153	hypothetical protein CGI_10004861	0.6833		GO:0016021
CGI_10027073	0.934291	1.54412e-09	5941.15	0.296674	0.022747	7393.5	0.752287	6.2718e-11	6370.75	0.661084	U1 small nuclear ribonucleo 70 kDa-like isoform X2	1		unknown
CGI_10027358	0.655354	0.00291759	288.97	0.604224	0.00540376	304.785	0.719685	0.00168747	289.444	0.659754	tumor p53-inducible 11-like isoform X3 [Crassostrea gigas]	0.803		GO:0016021
CGI_10000058	0.80271	0.000532244	23.8661	0.707389	0.00234152	25.4453	0.468623	0.038302	26.7929	0.659574	pre-mRNA-processing factor 6-like	0.903		GO:0071013;GO:0046540;GO:0000244
CGI_10023665	0.630117	0.00052103	77.7588	0.933867	2.56621e-08	74.6913	0.410913	0.00438287	84.9631	0.658299	hypothetical protein CGI_10023665	0.9925		unknown
CGI_10010082	0.275616	0.00361819	226.306	0.236182	0.0132031	238.159	1.46186	2.30912e-45	172.093	0.657887	periodic tryptophan 2 homolog	0.8225		GO:0032040;GO:0000462;GO:0030515;GO:0034388;GO:0000028
CGI_10015919	0.897626	2.43853e-06	54.4938	0.559736	0.00172251	62.0963	0.51502	0.00606007	61.7986	0.657461	acetyl- carboxylase- partial	0.8155		GO:0065008;GO:0006084;GO:0005741;GO:0006633;GO:0006853;GO:0005634;GO:0005524;GO:0005515;GO:0006768;GO:0051289;GO:0003989;GO:0046322;GO:0005829;GO:0031325;GO:0050995
CGI_10012659	0.723232	2.70067e-05	47.5265	0.71671	1.19255e-05	49.5902	0.532295	0.00156378	51.3093	0.657412	lactadherin isoform X1	0.6455		GO:0016021
CGI_10011099	0.658114	1.23702e-10	1194.19	0.709387	1.41121e-14	1224.52	0.600295	1.86305e-12	1239.5	0.655932	ubiquitin-like-specific protease 1	0.5538		GO:0008270
CGI_10024480	0.718964	4.10085e-06	477.632	0.348663	0.0243476	553.08	0.897928	6.08246e-10	466.331	0.655185	caspase-9-like isoform X2	0.578		GO:0033619;GO:0030660;GO:0071556;GO:0051716;GO:0071458;GO:0006465;GO:0008234;GO:0042981;GO:0044763;GO:0042500;GO:0005765
CGI_10003039	0.470854	0.0313892	35.7001	0.710532	0.00283713	34.6846	0.77296	0.00063285	33.5496	0.651449	myb-related transcription partner of profilin-like	0.7225		GO:0005634;GO:0006915
CGI_10010132	0.994747	6.23366e-09	254.246	0.611643	4.95502e-07	292.851	0.34771	0.00871152	310.606	0.651367	alkaline phosphatase-like	0.6875		GO:0016311;GO:0004035
CGI_10015444	0.543018	0.0359711	20.1455	0.781987	0.0147733	19.3333	0.623824	0.036334	20.1013	0.64961	chitin synthase	0.7145		GO:0000166;GO:0016758;GO:0008152;GO:0016021;GO:0016787
CGI_10024119	0.500805	0.034144	233.807	0.754614	0.0012648	225.81	0.69009	0.00252134	225.918	0.648503	retinol dehydrogenase 12-like	0.6995		GO:0016491;GO:0055114
CGI_10018445	0.680902	0.00475599	433.988	0.683813	0.00869227	449.62	0.571631	0.0232383	456.889	0.645449	hypothetical protein CGI_10018445	0.885		unknown
CGI_10007878	0.570798	0.00482972	69.1777	0.624501	0.00106602	70.8332	0.732956	0.000126525	67.534	0.642752	hypothetical protein CGI_10007878	0.9029		GO:0016021
CGI_10021907	0.554092	2.57402e-08	193.933	0.9287	1.21324e-17	182.436	0.445235	5.80209e-05	204.338	0.642675	[Monosiga brevicollis MX1]	0.5295		GO:0043065;GO:0042981
CGI_10002173	0.867147	3.03141e-06	189.602	0.425155	0.0253439	222.932	0.634626	0.000197405	206.246	0.64231	[Trichoplax adhaerens]	0.5785		GO:0007165
CGI_10010965	0.750009	1.1532e-12	631.915	0.499689	7.32779e-10	704.131	0.675944	3.75064e-13	658.556	0.641881	Elongation factor mitochondrial	0.816		GO:0005525;GO:0005634;GO:0003746;GO:0003924;GO:0005739;GO:0070125
CGI_10022712	0.36207	0.0190526	64.7391	0.801451	2.39292e-07	59.4187	0.762045	3.43465e-06	58.764	0.641855	cell death abnormality 1-like	0.86		GO:0016021
CGI_10024101	0.412745	0.00247964	273.343	0.940104	1.56557e-14	246.292	0.563764	1.61802e-06	267.193	0.638871	NFATC2-interacting -like [Limulus polyphemus]	0.5445		unknown
CGI_10006155	0.485276	3.37294e-07	1060.58	0.777697	1.35495e-21	1017.86	0.651608	1.891e-09	1032.83	0.638194	5 -nucleotidase domain-containing 1	0.5815		unknown
CGI_10015937	0.372974	0.0170358	81.9595	0.719019	2.15735e-06	77.1846	0.819995	1.20924e-08	73.8868	0.637329	Methyltransferase partial	0.6805		unknown
CGI_10001626	0.762474	1.04198e-09	152.485	0.4038	0.000162304	175.415	0.745165	4.54573e-09	156.66	0.637146	Multiple epidermal growth factor-like domains 10	0.773		unknown
CGI_10004523	0.651318	8.38184e-06	2537.76	0.500447	0.000732903	2752.27	0.752856	1.22367e-07	2521.29	0.634874	phosphatidylinositol phosphatase PTPRQ-like	0.7415		GO:0004725;GO:0016021;GO:0035335
CGI_10027279	0.660649	1.60523e-10	404.898	0.247804	0.0171881	475.447	0.994387	2.13453e-21	380.14	0.63428	patched domain-containing 3-like	0.644		GO:0007165;GO:0016021;GO:0008158
CGI_10023299	0.671103	0.00134752	994.57	0.525222	0.0174018	1077.21	0.706233	0.000545994	1006.06	0.634186	hypothetical protein CGI_10023299	0.676		unknown
CGI_10020123	0.714296	0.000968159	62.674	0.636556	0.00209469	66.5778	0.549724	0.009646	67.1088	0.633525	G- coupled receptor GRL101-like	0.755		GO:0007186;GO:0004725;GO:0016021;GO:0035335;GO:0016500;GO:0008063
CGI_10020503	0.619275	6.17999e-08	254.519	0.705038	3.73379e-10	258.305	0.574035	1.9554e-08	263.346	0.632783	polycomb group RING finger 6-like [Lingula anatina]	0.7725		GO:0000122;GO:0008270;GO:0045814;GO:0035102;GO:0051443;GO:1990841;GO:0016925;GO:0030097;GO:0048146;GO:0071535;GO:0007379;GO:0005654
CGI_10010648	0.522302	0.0104021	80.6331	0.590279	0.00343952	82.0293	0.783717	6.2083e-05	76.5521	0.632099	transmembrane 234 homolog [Vollenhovia emeryi]	0.824		GO:0016021
CGI_10009522	0.603351	2.41035e-14	575.125	0.763149	1.14824e-22	572.372	0.522863	6.77009e-09	600.397	0.629788	solute carrier family facilitated glucose transporter member 6 [Oreochromis niloticus]	0.6805		GO:0016021;GO:0035428;GO:0015758;GO:0051119
CGI_10016344	0.730424	6.56095e-05	65.9186	0.66223	1.61693e-05	70.0325	0.490092	0.0045394	72.1088	0.627582	hypothetical protein CGI_10016344	0.985		unknown
CGI_10026440	0.535272	0.0419983	66.8045	0.724912	0.00537569	65.6966	0.622283	0.02485	66.3484	0.627489	PREDICTED: uncharacterized protein LOC105326493 isoform X1 [Crassostrea gigas]	0.995		unknown
CGI_10009392	0.71614	1.01002e-05	78.239	0.643473	0.00014139	82.7996	0.519498	0.00280616	84.4333	0.62637	Pre-mRNA-processing factor 6	0.848		GO:0005634;GO:0000398
CGI_10003014	0.503227	0.000362849	107.009	0.45953	0.000637698	112.663	0.907775	7.4474e-12	98.0666	0.623511	Tripartite motif-containing 2	0.5195		GO:0016567
CGI_10022041	0.78142	3.15825e-06	55.0583	0.715508	5.44167e-06	58.2416	0.372722	0.0262803	63.3759	0.623217	[Nematostella vectensis]	0.5955		GO:0008168;GO:0032259
CGI_10003704	0.555129	0.000591033	286.868	0.544451	0.000274613	299.174	0.769189	2.53725e-08	276.716	0.622923	macrophage-expressed gene 1 -like	0.7608		GO:0016020
CGI_10000766	0.884091	6.98613e-09	97.4099	0.637999	1.98825e-06	108.195	0.345563	0.0316777	115.697	0.622551	DENN domain-containing 3	0.6245		GO:0016021;GO:0017112;GO:0043547
CGI_10007835	0.666115	1.11477e-07	136.039	0.568682	0.000313614	144.926	0.630765	1.45739e-05	140.115	0.621854	Cartilage matrix	0.6195		GO:0005509
CGI_10008391	0.665313	0.00126215	2170.16	0.481876	0.0474416	2373.42	0.711743	0.000760375	2186.32	0.619644	orexin receptor type 2-like [Octopus bimaculoides]	0.576		GO:0004930;GO:0007186;GO:0016021
CGI_10019170	0.367347	9.25042e-09	549.231	1.10599	1.6441e-76	470.274	0.378539	2.10392e-10	558.88	0.617292	ADP-ribosylarginine hydrolase-like isoform X4 [Aplysia californica]	0.743		GO:0000287;GO:0003875;GO:0031338;GO:0090630;GO:0005096;GO:0012505;GO:0051725;GO:0006886;GO:0017137;GO:0005622
CGI_10006518	0.482771	9.3096e-05	1124.35	0.594561	4.06034e-07	1131.68	0.770759	2.33345e-13	1060.97	0.616031	macrophage-expressed gene 1	0.671		GO:0016021
CGI_10028857	0.453752	0.00291967	253.719	0.691512	2.89566e-06	246.306	0.695668	1.7084e-06	241.777	0.613644	Adenylate cyclase type 2	0.631		GO:0000166;GO:0016849;GO:0016021;GO:0005622;GO:0009190;GO:0035556
CGI_10024176	0.530775	5.91552e-05	123.044	0.800456	7.82548e-09	118.776	0.507877	8.07414e-05	126.811	0.613036	5-hydroxytryptamine receptor 4-like	0.551		GO:0004930;GO:0007186;GO:0016021
CGI_10011060	0.642617	3.25087e-08	267.147	0.682162	2.16082e-08	274.438	0.513789	2.93218e-08	283.226	0.612856	A-kinase anchor mitochondrial-like	0.698		GO:0044464;GO:0016310;GO:0016301
CGI_10010027	0.697217	0.000340521	1550.82	0.684285	6.41576e-05	1621.28	0.452234	0.0203626	1701.27	0.611246	fatty acid-binding homolog 6-like isoform X1 [Crassostrea gigas]	0.955		unknown
CGI_10015761	0.3175	0.00631393	360.626	0.626755	1.4172e-11	342.384	0.889319	3.75024e-21	314.039	0.611191	hypothetical protein CGI_10015761	1		unknown
CGI_10006469	0.441951	0.00249346	109.068	0.718124	1.34592e-07	104.974	0.669375	2.62109e-07	104.569	0.609817	HD domain-containing 2	0.75		GO:0070062;GO:0005739
CGI_10009282	0.783574	9.22462e-22	453.641	0.536611	6.44575e-11	503.679	0.495511	2.35769e-10	501.137	0.605232	Pre-mRNA-processing factor 6	0.891		GO:0071013;GO:0003713;GO:0050681;GO:0016020;GO:0046540;GO:0043021;GO:0005682;GO:0045944;GO:0006403;GO:0005654;GO:0044822;GO:0000244
CGI_10007837	0.43661	2.64311e-06	495.219	0.923192	3.25892e-18	451.05	0.455222	1.45194e-05	502.662	0.605008	Cartilage matrix	0.614		GO:0005509
CGI_10005995	0.676202	2.12438e-06	78.5877	0.447041	0.00140758	87.3189	0.690691	2.56104e-07	80.1282	0.604645	platelet endothelial aggregation receptor 1-like isoform X4	0.681		GO:0016021
CGI_10017501	0.561951	0.0168129	161.957	0.498881	0.0352203	171.475	0.750981	0.00258163	156.306	0.603938	formin 7 isoform X1 [Crassostrea gigas]	0.73		unknown
CGI_10026781	0.623051	1.12382e-05	85.3236	0.613327	5.73985e-05	88.8796	0.570951	8.1536e-05	88.3434	0.602443	Tripartite motif-containing 2	0.799		GO:0008270;GO:0005622;GO:0016567
CGI_10023414	0.459514	7.60874e-06	793.283	0.898188	5.74011e-24	733.21	0.445306	1.57551e-05	813.698	0.601002	UPF0515 C19orf66 homolog isoform X2	0.9033		unknown
CGI_10005475	0.448825	0.0032487	75.8035	0.494828	0.000449062	77.7449	0.857839	1.57481e-06	68.8936	0.600497	PREDICTED: uncharacterized protein LOC105325922 [Crassostrea gigas]	1		unknown
CGI_10003830	0.786529	8.74583e-06	47.0606	0.646396	0.000149145	50.8852	0.367426	0.0313504	54.3012	0.600117	tyrosine--tRNA cytoplasmic	0.888		GO:0004832;GO:0004831;GO:0005524;GO:0006437;GO:0006438;GO:0005829;GO:0000049
CGI_10023624	0.780511	1.6026e-11	320.025	0.663413	7.29131e-11	343.467	0.356166	0.00997539	368.525	0.60003	Tripartite motif-containing 2	0.8695		GO:0008270;GO:0005622;GO:0016567
CGI_10022345	0.488214	0.0244284	80.4175	0.705795	3.62559e-06	78.8357	0.601006	2.5103e-05	79.9192	0.598339	Tripartite motif-containing 2	0.5655		GO:0008270;GO:0005622;GO:0016567
CGI_10014404	0.811149	1.23804e-52	617.083	0.50219	5.18638e-21	697.194	0.479525	1.32631e-15	689.34	0.597622	caspase-3-like [Crassostrea gigas]	0.5795		GO:0006508;GO:0004197;GO:0043065;GO:0042981
CGI_10027305	0.617376	1.80171e-13	325.963	0.561337	2.58127e-08	344.146	0.610409	4.09881e-11	333.312	0.596374	tetraspanin-11-like [Biomphalaria glabrata]	0.5805		GO:0016021
CGI_10002515	0.550998	1.20271e-12	699.913	0.509772	7.56372e-22	736.723	0.728092	2.79264e-30	681.549	0.596287	FAN isoform X1	0.6435		GO:0016021
CGI_10015617	0.526405	5.19611e-08	295.51	0.578285	4.30892e-12	302.35	0.683467	8.00714e-18	288.787	0.596052	phosphatidylinositol glycan anchor biosynthesis class U partial	0.682		GO:0006506;GO:0016021
CGI_10027248	0.261611	0.0498238	204.784	0.759852	2.63543e-10	184.164	0.765951	2.93699e-09	180.489	0.595805	Gamma-glutamyltranspeptidase 1	0.956		GO:0006749;GO:0016021;GO:0003840
CGI_10004210	0.635478	0.00107854	442.883	0.558765	0.00121163	471.198	0.590935	0.00105537	458.425	0.595059	receptor-type tyrosine- phosphatase mu-like	0.7115		GO:0004725;GO:0035335
CGI_10011635	0.400579	4.56132e-05	164.988	0.709429	4.66028e-11	157.003	0.67175	3.65249e-12	155.82	0.593919	thymus-specific serine protease-like	0.7615		GO:0006508;GO:0016021;GO:0008236;GO:0005773;GO:0008238
CGI_10024514	0.600366	0.000478576	99.2129	0.721245	4.40075e-05	99.6891	0.456293	0.00225012	105.753	0.592635	cholecystokinin receptor-like [Crassostrea gigas]	0.54		GO:0004930;GO:0007186;GO:0016021
CGI_10022233	0.786444	2.42669e-14	271.508	0.780705	4.18835e-14	282.463	0.201357	0.0420095	328.309	0.589502	trifunctional nucleotide phosphoesterase -like	0.758		GO:0000166;GO:0009166;GO:0016787
CGI_10007791	0.610674	7.8122e-06	114.02	0.402202	0.00174031	125.821	0.752598	1.81196e-08	111.748	0.588491	dolichyl pyrophosphate Man9 c2 alpha-1,3-glucosyltransferase [Cavia porcellus]	0.722		GO:0005789;GO:0006490;GO:0042281;GO:0006487
CGI_10015477	0.724161	8.21529e-10	134.112	0.292741	0.00813772	158.282	0.746116	2.24068e-12	136.539	0.587673	Tripartite motif-containing 2	0.7965		GO:0008270;GO:0005622;GO:0016567
CGI_10017740	0.81642	1.44093e-35	735.362	0.718055	6.29781e-29	784.082	0.228467	0.000974767	888.723	0.587647	Coiled-coil domain-containing mitochondrial	0.608		unknown
CGI_10002905	0.438333	0.00103293	290.523	0.439357	0.00134576	301.791	0.88082	5.83101e-11	262.717	0.58617	low density lipo receptor adapter 1-B-like isoform X2	0.7385		unknown
CGI_10001398	0.659859	0.000761523	258.96	0.471102	0.0109956	284.414	0.62463	0.00117326	266.997	0.585197	probable G- coupled receptor 157	0.599		GO:0004930;GO:0007186;GO:0016021;GO:0007166
CGI_10010299	0.801982	3.9528e-12	997.434	0.503962	1.27801e-05	1124.38	0.444412	0.000123716	1124.19	0.583452	EF-hand domain-containing D2-like	0.796		GO:0005515;GO:0005509;GO:0016020
CGI_10028806	0.544395	6.88097e-15	1186.54	0.658238	6.40736e-31	1194.93	0.541471	1.18067e-25	1212.66	0.581368	Protein DPCD	0.828		GO:0021591;GO:0006955;GO:0006928;GO:0016020;GO:0005164;GO:0007389
CGI_10015334	0.612268	1.00586e-15	288.347	0.361603	4.86706e-05	322.613	0.768227	8.06718e-24	282.446	0.580699	WD repeat-containing partial	0.901		GO:0042384;GO:0005929;GO:0030991;GO:0035721
CGI_10017583	0.652316	6.18738e-06	317.743	0.554868	3.16062e-05	339.488	0.532847	0.0289666	333.439	0.58001	organic cation transporter -like [Crassostrea gigas]	0.659		GO:0055085;GO:0022857;GO:0016021
CGI_10001019	0.489331	0.000135598	102.965	0.781678	8.17135e-09	98.6932	0.467635	0.000350039	105.695	0.579548	hypothetical protein CGI_10001019	0.9475		GO:0016021;GO:0004672;GO:0006468
CGI_10017742	0.570521	0.000623683	955.109	0.48729	0.00336244	1016.86	0.665851	3.58845e-05	949.504	0.574554	drebrin [Crassostrea gigas]	0.6045		GO:0003779;GO:0005622
CGI_10015910	0.63589	0.0166159	6718.64	0.526288	0.0283473	7233.57	0.555616	0.0250168	7039.08	0.572598	transforming growth factor-beta-induced ig-h3-like	0.5625		unknown
CGI_10024742	0.787318	1.96015e-16	163.618	0.589034	1.30499e-10	179.481	0.341302	0.000122137	189.702	0.572551	secernin-2-like [Priapulus caudatus]	0.6475		GO:0016805;GO:0006508
CGI_10024397	0.602629	6.57067e-11	1080.77	0.662067	1.50045e-20	1106	0.451523	4.33384e-09	1153.18	0.572073	PREDICTED: uncharacterized protein LOC105341803 [Crassostrea gigas]	1		GO:0016021
CGI_10019840	0.46619	4.15441e-06	313.235	0.461529	3.24018e-06	325.828	0.784783	2.77153e-18	292.97	0.570834	voltage-dependent R-type calcium channel subunit alpha-1E-like [Crassostrea gigas]	0.6025		GO:0034220;GO:0016021;GO:0034765;GO:0005244
CGI_10011197	0.327052	0.0010774	363.434	0.441412	4.19498e-08	364.861	0.94337	3.79496e-12	312.151	0.570611	hypothetical protein CGI_10011197	1		unknown
CGI_10024504	0.768236	2.0125e-12	275.634	0.732772	6.50067e-11	289.158	0.208684	0.0482899	331.829	0.569897	Tripartite motif-containing 2	0.898		GO:0008270;GO:0071203;GO:0016567
CGI_10016204	0.722995	1.31167e-10	231.484	0.408282	0.000541436	263.026	0.578029	1.86517e-08	245.759	0.569769	glyco -N-acetylgalactosamine 3-beta-galactosyltransferase 1-like	0.755		GO:0016021;GO:0016263;GO:0016266
CGI_10002943	0.51575	0.000227928	250.554	0.583606	3.51555e-06	255.432	0.60683	2.69384e-06	249.355	0.568729	chorion class high-cysteine HCB 13-like	0.91		GO:0016021
CGI_10021401	0.48674	0.00139139	160.203	0.48398	0.000583279	166.684	0.731515	2.70238e-07	152.796	0.567412	UPF0538 C2orf76 homolog	0.7905		unknown
CGI_10001639	0.738003	3.38861e-06	116.179	0.591428	1.98396e-05	126.035	0.3687	0.01154	132.275	0.566044	PREDICTED: uncharacterized protein LOC105343036 isoform X1	0.7085		GO:0016021
CGI_10004009	0.463939	0.000429149	295.695	0.619635	7.5114e-13	294.188	0.610738	5.90395e-12	289.83	0.564771	G- coupled receptor GRL101-like	0.777		GO:0007186;GO:0004725;GO:0016021;GO:0035335;GO:0016500
CGI_10023670	0.600104	2.9556e-05	140.741	0.591348	2.63062e-06	146.73	0.498234	4.95314e-06	147.95	0.563229	DJ-1 homolog D-like	0.7255		GO:0008152;GO:0016798
CGI_10025789	0.706825	1.51833e-05	74.8638	0.602172	0.00107186	79.9958	0.379822	0.0369312	83.935	0.562939	deoxyribonuclease TATDN3 isoform X2	0.745		GO:0016888;GO:0006259
CGI_10028581	0.936949	5.81498e-14	514.113	0.281987	0.0138702	642.101	0.468441	3.98613e-05	595.717	0.562459	hypothetical protein CGI_10028581	1		unknown
CGI_10014839	0.40163	0.00159599	749.079	0.401515	0.000449284	778.677	0.881276	1.51622e-12	670.158	0.561474	hemicentin-2-like isoform X1	0.559		unknown
CGI_10005149	0.600207	5.50962e-11	227.506	0.61392	0.00028245	234.77	0.469413	2.79837e-06	241.269	0.56118	Parkinson disease 7 domain-containing 1-like isoform X2	0.6945		unknown
CGI_10004987	0.745002	0.000422481	55.6604	0.408938	0.0284718	63.9785	0.528989	0.00227443	60.558	0.560976	prune homolog	0.752		GO:0006816;GO:0016021
CGI_10008993	0.349812	0.0223829	88.1452	0.305532	0.0311991	92.8708	1.02385	1.06937e-13	74.9334	0.559732	hypothetical protein CGI_10008993	0.8538		GO:0008061;GO:0006030;GO:0016021;GO:0005576
CGI_10017211	0.546642	0.000214622	89.1702	0.731626	1.14829e-07	88.023	0.395695	0.00423462	95.2583	0.557988	hypothetical protein CGI_10017211	0.835		unknown
CGI_10016838	0.581572	3.49533e-05	117.484	0.523838	8.67465e-06	124.338	0.565931	5.69021e-05	120.717	0.557114	GTPase IMAP family member 7-like	0.6715		GO:0005525;GO:0008270
CGI_10022097	0.377372	0.023146	83.7875	0.691671	3.89709e-05	79.5767	0.597202	6.86737e-05	80.2053	0.555415	Tripartite motif-containing 45	0.4845		unknown
CGI_10001002	0.533656	0.0212187	39.6167	0.602417	0.00698908	40.4315	0.525394	0.0116361	40.6698	0.553823	ral GTPase-activating subunit beta-like isoform X4	0.8585		GO:0051056;GO:0005096;GO:0043547
CGI_10018948	0.63184	1.9969e-13	235.608	0.275911	0.0236511	271.68	0.752878	2.86053e-15	232.897	0.553543	Epimerase family SDR39U1	0.703		GO:0050662;GO:0003824;GO:0008152
CGI_10007683	0.208905	0.00353959	1170.74	0.556521	3.16192e-19	1095.48	0.8879	1.39538e-23	985.627	0.551108	transient receptor potential cation channel subfamily M member 2-like [Crassostrea gigas]	0.7665		GO:0005216;GO:0034220;GO:0016021
CGI_10002898	0.558759	3.89109e-06	177.127	0.477821	0.000191912	188.534	0.609973	2.79913e-07	178.515	0.548851	multiple epidermal growth factor-like domains 10	0.803		GO:0016021
CGI_10007061	0.428779	0.00388668	515.067	0.46225	3.55527e-05	530.506	0.755461	7.41188e-17	480.983	0.54883	hepatocyte growth factor receptor-like	0.61		GO:0005524;GO:0018108;GO:0004713;GO:0016021
CGI_10024350	0.531419	1.45991e-10	377.545	0.721523	1.42613e-18	372.607	0.391845	2.0863e-07	401.331	0.548262	hypothetical protein CGI_10024350	0.815		GO:0016021
CGI_10026431	0.719931	0.000863018	2336.73	0.453416	0.0122474	2630.26	0.464795	0.0253623	2571.27	0.546047	mammalian ependymin-related 1-like	0.6293		GO:0007160;GO:0005509;GO:0005576
CGI_10014289	0.329444	0.00711526	137.38	0.603959	5.18855e-07	131.555	0.70406	9.35507e-09	125.959	0.545821	serine-rich adhesin for platelets-like [Octopus bimaculoides]	0.8688		GO:0004930;GO:0007186;GO:0016021
CGI_10011833	0.693463	2.04603e-10	173.417	0.273573	0.018687	203.835	0.669208	2.5285e-09	178.017	0.545415	SSUH2 homolog	0.7065		GO:0005634;GO:0006355;GO:0043565
CGI_10027824	0.540199	1.25399e-07	2456.13	0.461293	3.57028e-06	2611.45	0.630337	1.54894e-11	2445.63	0.543943	phosphatidylinositol 4,5-bisphosphate 3-kinase catalytic subunit delta isoform	0.5885		GO:0048015;GO:0046854;GO:0016773;GO:0016301;GO:0005622
CGI_10027790	0.524092	0.00193412	167.17	0.490415	0.000907215	175.657	0.613969	2.62712e-05	166.714	0.542825	Prostaglandin E2 receptor EP4 subtype	0.7805		GO:0004930;GO:0007186;GO:0016021
CGI_10027932	0.496781	0.000263657	95.2439	0.473927	0.000862998	99.699	0.654608	3.63058e-07	92.9951	0.541772	glucocorticoid modulatory element-binding 1-like	0.5875		GO:0005634;GO:0003677;GO:0003713;GO:1903506
CGI_10018909	0.357338	0.000527334	332.842	0.577038	8.91131e-09	324.184	0.69014	1.14961e-13	308.89	0.541506	disease resistance RGA3	0.675		GO:0055085;GO:0016021;GO:0043531;GO:0005215
CGI_10021278	0.416041	0.00238032	75.8361	0.649374	3.80013e-05	73.4984	0.556393	0.00021892	74.3574	0.540603	hypothetical protein CGI_10021278	0.7411		GO:0005509
CGI_10013639	0.416273	0.0237563	95.2607	0.698882	4.57147e-09	91.5741	0.505404	5.71274e-05	94.9534	0.540186	Separin	0.6305		GO:0005634;GO:0006508;GO:0008233
CGI_10009812	0.352124	0.000701034	2151.71	0.803575	4.12291e-09	1964.96	0.46343	7.18843e-06	2123.77	0.53971	Nucleoredoxin [Crassostrea gigas]	0.697		unknown
CGI_10022115	0.775726	3.57061e-09	805.563	0.420178	0.00152406	925.41	0.42152	0.000830814	908.915	0.539141	Tripartite motif-containing 2 [Crassostrea gigas]	0.88		GO:0008270;GO:0071203;GO:0016567
CGI_10004802	0.488085	0.00530176	642.413	0.595224	0.000381494	647.107	0.53379	0.00114609	647.314	0.539033	Mid1-interacting 1A [Trichinella pseudospiralis]	0.5995		unknown
CGI_10003043	0.68477	3.25893e-06	2460.99	0.515764	0.000328482	2682.71	0.415964	0.00954815	2713.24	0.538832	stanniocalcin [Haliotis diversicolor supertexta]	0.5185		GO:0005576;GO:0005179
CGI_10025824	0.544578	4.41479e-09	187.02	0.641967	1.33721e-12	189.359	0.428045	1.44855e-06	197.686	0.538197	general transcription factor IIE subunit 2-like	0.7565		GO:0003677;GO:0003743;GO:0006355;GO:0005673;GO:0006413;GO:0006367
CGI_10025550	0.70055	1.30299e-07	578.252	0.306228	0.0359447	673.95	0.605626	2.28009e-06	605.988	0.537468	hypothetical protein CGI_10025550	0.6344		unknown
CGI_10001585	0.661082	2.94429e-11	598.405	0.647102	3.45403e-13	624.627	0.294232	0.00104462	680.446	0.534139	zer-1 homolog	0.57		unknown
CGI_10019681	0.424959	3.38425e-07	2292.66	0.56529	4.0196e-09	2287.07	0.602479	1.42982e-12	2224.32	0.530909	membrane metallo-endopeptidase-like 1	0.595		GO:0007160;GO:0005509;GO:0006508;GO:0005576;GO:0004222
CGI_10019145	0.629452	3.95758e-05	75.2012	0.420981	0.00349605	83.0333	0.53906	0.00110602	78.847	0.529831	Uncharacterized protein C12orf45-like protein	0.714		unknown
CGI_10003824	0.644685	9.22233e-10	335.967	0.529517	9.51636e-09	360.734	0.406597	2.72031e-06	367.377	0.526933	hypothetical protein CGI_10003824	0.84		unknown
CGI_10020286	0.629595	1.6906e-07	257.013	0.417194	0.00133492	283.843	0.531935	7.09887e-07	269.997	0.526241	methyltransferase 13	0.6705		GO:0008168;GO:0032259
CGI_10005080	0.628882	0.000114368	129.07	0.542428	0.00129394	137.412	0.405454	0.0232785	140.604	0.525588	Peripheral myelin 22	0.5675		GO:0016021
CGI_10020714	0.721077	1.97488e-08	212.489	0.331821	0.000571343	247.418	0.522676	2.61403e-05	229.476	0.525191	cirhin-like [Octopus bimaculoides]	0.5895		unknown
CGI_10016696	0.580762	0.00372375	45.003	0.587599	0.00122174	46.695	0.406562	0.0318016	48.4743	0.524974	hypothetical protein CGI_10016696	1		unknown
CGI_10005743	0.432871	0.0456821	40.9496	0.463045	0.0132532	42.2832	0.66785	0.000588024	39.2174	0.521255	Transcription factor E2F3	0.699		GO:0005634;GO:0005667;GO:0003677;GO:0003700;GO:0006351;GO:0006355
CGI_10015688	0.400653	0.0401223	131.796	0.726946	8.79551e-06	124.931	0.436064	0.0170215	133.296	0.521221	solute carrier family riboflavin member 3	0.596		GO:0016021
CGI_10003254	0.312549	0.00257543	219.123	0.489706	5.17541e-05	215.32	0.757464	2.90789e-14	196.965	0.519906	Tripartite motif-containing 3	0.5795		GO:0008270;GO:0005622;GO:0016567
CGI_10026051	0.433853	2.31066e-07	487.908	0.595091	7.24827e-07	483.442	0.525219	4.35493e-11	485.005	0.518054	ecdysone-induced 78C-like isoform X8 [Crassostrea gigas]	0.8325		GO:0004887;GO:0005634;GO:0008270;GO:0006351;GO:0003707;GO:0006355;GO:0043565;GO:0043401;GO:0030522
CGI_10006501	0.571035	3.74354e-15	284.809	0.539176	3.89049e-13	298.603	0.441436	1.1348e-07	301.888	0.517216	nudix hydrolase chloroplastic-like	0.5365		GO:0008152;GO:0016787
CGI_10011987	0.773954	7.88395e-09	76.0351	0.44529	0.000704628	86.6244	0.328399	0.0113948	88.2728	0.515881	Tripartite motif-containing 2	0.8545		GO:0008270;GO:0005622;GO:0016567
CGI_10023622	0.420646	0.000595225	294.04	0.514989	7.67906e-06	297.351	0.611416	3.06459e-08	284.163	0.515684	Tripartite motif-containing 2	0.877		GO:0008270;GO:0005622;GO:0016567
CGI_10023067	0.468422	0.0347692	39.0146	0.491598	0.0215161	40.324	0.582946	0.0065774	38.5409	0.514322	probable Ras GTPase-activating isoform X3	0.7195		unknown
CGI_10005084	0.535464	1.67262e-05	191.064	0.500937	7.80663e-06	200.914	0.505133	2.61101e-05	196.824	0.513845	PREDICTED: uncharacterized protein LOC105347199	0.6627		unknown
CGI_10019047	0.57554	1.83137e-10	235.557	0.253589	0.00398476	269.906	0.711041	6.53347e-11	231.475	0.51339	uncharacterized aminotransferase -like	0.701		GO:0003824;GO:0034220;GO:0008152;GO:0016021;GO:0005230;GO:0005886
CGI_10026963	0.466955	0.0120863	49.1168	0.451258	0.0260723	51.2471	0.617155	0.000892599	47.994	0.511789	[Nematostella vectensis]	0.7105		unknown
CGI_10024306	0.473997	2.47107e-05	247.299	0.704039	1.15997e-11	241.224	0.356152	8.58375e-05	261.989	0.511396	cyclic nucleotide-binding domain-containing 2-like	0.621		unknown
CGI_10015922	0.370069	0.00494281	294.629	0.637386	1.77208e-09	283.421	0.526649	7.63533e-07	287.393	0.511368	neurofascin-like isoform X2	0.8125		GO:0005509;GO:0016021
CGI_10026050	0.399768	0.000461721	178.22	0.623137	9.41157e-06	173.538	0.508108	6.67648e-06	176.205	0.510337	ecdysone-induced 78C-like isoform X8 [Crassostrea gigas]	0.9911		unknown
CGI_10024513	0.540698	0.000933154	79.6509	0.359847	0.00664818	87.499	0.628399	6.83861e-06	79.4871	0.509648	cholecystokinin receptor-like [Crassostrea gigas]	0.522		GO:0004930;GO:0007186;GO:0016021
CGI_10010658	0.440872	0.00412038	324.701	0.537238	2.00462e-05	328.461	0.546921	1.1444e-05	321.771	0.508344	multiple epidermal growth factor-like domains 6	0.5725		GO:0004721;GO:0006470
CGI_10014851	0.57322	4.29372e-05	73.1247	0.474159	0.00153415	78.1469	0.477089	0.00220273	76.5521	0.508156	Potassium channel subfamily K member 2	0.6395		GO:0050794;GO:0071805;GO:0043231;GO:0016021;GO:0043005;GO:0005267;GO:0050896;GO:0044459
CGI_10010680	0.685234	6.27725e-10	122.793	0.390011	0.001387	138.59	0.448528	1.606e-05	133.853	0.507924	magnesium-dependent phosphatase 1-like	0.7235		GO:0016791;GO:0016311
CGI_10011699	0.407231	7.10809e-06	599.314	0.52638	3.88007e-11	601.499	0.586084	4.43725e-09	580.918	0.506565	C-ets-2-like [Crassostrea gigas]	0.7605		GO:0005634;GO:0003700;GO:0006355;GO:0043565
CGI_10001018	0.460067	2.6079e-07	441.445	0.654727	2.13129e-09	433.773	0.404718	0.000253958	458.064	0.506504	AAEL008777-PA [Aedes aegypti]	0.603		GO:0005524;GO:0016021;GO:0004672;GO:0006468
CGI_10018628	0.278668	0.0106751	591.415	0.814493	7.62008e-17	527.822	0.411096	2.97008e-05	579.524	0.501419	aquaporin-8-like isoform X1	0.6525		GO:0016021;GO:0044765;GO:0005215
CGI_10011818	0.512755	0.00158378	528.139	0.533391	0.000119904	546.053	0.457955	3.99199e-05	549.12	0.501367	phosphoglucomutase	0.7855		GO:0000287;GO:0004614;GO:0005978;GO:0019388;GO:0005829;GO:0006006
CGI_10011970	0.495869	1.80525e-09	707.131	0.597396	2.14674e-13	713.874	0.40174	3.57036e-06	742.277	0.498335	Lysosomal thioesterase PPT2	0.62		GO:0008474;GO:0098734;GO:0016021;GO:0043227
CGI_10007716	0.35525	0.00180412	148.625	0.748474	2.70749e-11	137.84	0.391162	0.022604	149.89	0.498295	Tudor and KH domain-containing	0.655		GO:0005737;GO:0044702
CGI_10009272	0.373694	0.0374657	465.56	0.446236	0.0268003	472.558	0.672403	4.23619e-07	436.527	0.497444	Multimerin-2 [Crassostrea gigas]	0.7035		unknown
CGI_10008678	0.446505	4.94056e-08	458.89	0.507365	2.3708e-10	468.333	0.535503	5.50048e-13	456.714	0.496458	Receptor-type tyrosine- phosphatase T	0.685		GO:0004725;GO:0016021;GO:0035335
CGI_10022484	0.500696	0.000488799	325.78	0.433496	0.000387831	345.647	0.553159	1.02169e-05	327.681	0.495784	multiple epidermal growth factor-like domains 10	0.8275		GO:0004725;GO:0016021;GO:0035335
CGI_10012442	0.619236	0.000107836	62.4152	0.357862	0.0219468	70.1459	0.501317	0.00196327	65.9851	0.492805	Tripartite motif-containing 3	0.871		GO:0008270;GO:0071203;GO:0016567
CGI_10012865	0.396802	9.11513e-05	367.765	0.738153	2.37874e-19	347.575	0.342259	7.49303e-05	382.055	0.492404	Dedicator of cytokinesis 3	0.7665		GO:0007264;GO:0005085;GO:0005622;GO:0043547
CGI_10001976	0.537168	1.0796e-16	712.191	0.719221	1.51917e-22	704.087	0.207989	0.00731214	803.281	0.488126	hypothetical protein CGI_10001976	0.99		GO:0043065;GO:0042981
CGI_10025266	0.939983	3.04853e-05	158.735	0.263084	0.029965	201.555	0.257047	0.0366318	198.301	0.486705	inactive rhomboid 1-like	0.7265		GO:0006508;GO:0016021;GO:0004252
CGI_10021670	0.468968	6.73165e-06	263.451	0.542073	1.05993e-06	267.882	0.44581	2.68274e-05	270.915	0.485617	Tripartite motif-containing 2	0.8445		GO:0008270;GO:0005622;GO:0016567
CGI_10014584	0.421583	6.25216e-05	235.21	0.470742	6.28143e-06	240.823	0.563902	1.88326e-09	230.41	0.485409	calcium signal-modulating cyclophilin ligand-like	0.8933		unknown
CGI_10007772	0.58193	5.3552e-11	236.338	0.579451	1.80519e-10	245.604	0.29461	0.000282982	263.059	0.485331	THO complex subunit 7 homolog	0.805		GO:0006406;GO:0000781;GO:0008380;GO:0003723;GO:0005737;GO:0016607;GO:0000446;GO:0006397;GO:0000445;GO:0006368
CGI_10023127	0.365445	0.0389835	246.553	0.617862	4.50772e-06	238.366	0.469246	0.0030664	244.299	0.484184	Chitin synthase 3	0.587		GO:0016758;GO:0008152;GO:0016021
CGI_10007051	0.658503	1.89115e-11	213.084	0.297437	0.00884432	246.362	0.492066	4.64472e-07	228.191	0.482669	Tripartite motif-containing 3	0.891		GO:0008270;GO:0005622;GO:0016567
CGI_10021033	0.519703	1.34383e-07	441.112	0.636415	2.52551e-12	443.496	0.289453	0.00140045	482.482	0.481857	Stomatin 1	0.5595		GO:0016021
CGI_10011846	0.351573	0.0283429	128.846	0.716505	9.58654e-07	120.486	0.37572	0.0489348	130.237	0.481266	transcription factor kayak-like	1		unknown
CGI_10019741	0.5608	1.29774e-08	303.517	0.351914	7.79004e-05	335.785	0.52957	7.63909e-08	312.606	0.480762	Tripartite motif-containing 2 [Crassostrea gigas]	0.7495		GO:0008270;GO:0016021;GO:0005622;GO:0016567
CGI_10007680	0.323382	0.0492168	84.4097	0.638324	1.55212e-05	80.0422	0.475837	0.00229189	82.3338	0.479181	Tripartite motif-containing 2	0.8175		GO:0008270;GO:0005622;GO:0016567
CGI_10018147	0.716803	1.73588e-09	175.294	0.300664	0.0342864	205.703	0.416063	0.00068197	195.156	0.477843	tyrosine- kinase JAK2-like	0.98		GO:0005524;GO:0018108;GO:0005856;GO:0004715;GO:0005509
CGI_10016871	0.278923	0.00589445	163.444	0.562817	1.82911e-08	155.877	0.58821	4.16065e-10	152.115	0.47665	mitochondrial assembly of ribosomal large subunit 1	0.687		GO:0005737;GO:0017148
CGI_10022854	0.570849	7.34285e-12	257.092	0.247874	0.00504383	294.265	0.607238	3.03386e-10	259.717	0.47532	F-box At1g78280-like	0.584		GO:0016021
CGI_10011441	0.392044	6.37799e-05	521.683	0.802661	3.25994e-22	483.899	0.229936	0.00176117	560.568	0.47488	zinc finger ubi-d4-like isoform X2	0.935		GO:0008270
CGI_10025961	0.497508	0.0100205	279.897	0.379465	0.00854481	302.371	0.544252	0.00134669	282.313	0.473742	chitin synthase	0.6585		GO:0016758;GO:0008152;GO:0016021
CGI_10002332	0.467893	0.00297353	1145.91	0.468056	0.000155976	1192.83	0.48475	5.89687e-06	1166.9	0.473567	dentin sialophospho -like	0.638		unknown
CGI_10025271	0.569901	0.00107427	404.775	0.432058	0.0104616	438.274	0.41831	0.0202287	432.229	0.473423	gametocyte-specific factor 1-like [Larimichthys crocea]	0.6545		unknown
CGI_10017945	0.609868	7.9802e-06	231.644	0.417423	0.00266688	254.627	0.392326	0.00926814	252.075	0.473206	neuronal acetylcholine receptor subunit alpha-3-like	0.818		unknown
CGI_10024735	0.214322	0.018436	339.123	0.478454	1.46366e-10	324.976	0.726444	3.27711e-17	298.244	0.473073	Cyclin-related FAM58A	0.7625		GO:0005634;GO:0045737;GO:0016538;GO:1901409;GO:0000307;GO:0016021;GO:0045944
CGI_10022201	0.520565	2.16924e-10	689.353	0.462456	3.80821e-10	728.8	0.432016	4.40263e-11	722.738	0.471679	hypothetical protein CGI_10022201	0.83		GO:0090502;GO:0003723;GO:0016021;GO:0033897
CGI_10014053	0.576201	1.34403e-05	152.206	0.301487	0.0258194	171.833	0.536926	2.28219e-05	157.29	0.471538	ABC transporter B family member 27-like isoform X1 [Priapulus caudatus]	0.7615		GO:0005524;GO:0042626;GO:0055085;GO:0008152;GO:0016021
CGI_10012277	0.209925	0.0461014	497.643	0.878276	9.39532e-24	427.702	0.321806	0.000165011	490.399	0.470003	ras-related Rab-37 isoform X1	0.88		GO:0005525;GO:0006913;GO:0005515;GO:0007264;GO:0030141;GO:0003924;GO:0016020;GO:0008152;GO:0005793;GO:0006886
CGI_10018453	0.45623	5.10515e-05	271.059	0.594179	8.66832e-12	271.075	0.359461	7.04941e-05	285.228	0.469956	lipid droplet-associated hydrolase-like	0.658		unknown
CGI_10023091	0.409441	0.00536079	274.976	0.489397	1.2133e-08	279.58	0.509282	3.38098e-08	272.984	0.469373	Mitotic checkpoint serine threonine- kinase BUB1 beta	0.6055		GO:0007094;GO:0005524;GO:0004672;GO:0000776;GO:0006468
CGI_10024218	0.360795	0.0021089	411.009	0.521642	6.30123e-05	406.72	0.520931	3.91341e-06	399.948	0.467789	Maternal exuperantia-1	0.8727		GO:0003676;GO:0008152;GO:0008080
CGI_10014052	0.593653	5.6123e-08	808.074	0.306704	0.019544	914.06	0.501652	1.06006e-06	847.296	0.467337	RER1 isoform X1 [Sinocyclocheilus grahami]	0.806		GO:0042384;GO:0016021
CGI_10015888	0.208643	0.0410906	911.498	0.593424	7.22881e-11	843.472	0.599133	1.6815e-10	827.149	0.467066	placenta-specific gene 8 -like	0.7226		unknown
CGI_10012691	0.563303	0.00083779	75.5457	0.495072	0.00204932	80.185	0.342704	0.0354889	82.6113	0.467026	Tripartite motif-containing 2	0.911		GO:0008270;GO:0005622;GO:0016567
CGI_10006904	0.466813	2.48722e-05	285.814	0.627965	2.41129e-06	283.393	0.300334	0.00704651	307.035	0.465037	DNA-binding RFX7-like isoform X1	0.6545		GO:0003677;GO:0006355
CGI_10017029	0.50614	0.00751318	60.7559	0.39943	0.0321105	65.2195	0.487432	0.042562	62.2148	0.464334	bicaudal- [Pediculus humanus corporis]	0.6625		GO:0000166;GO:0016310;GO:0016301
CGI_10009708	0.484311	1.60194e-09	927.059	0.476051	1.54126e-09	966.026	0.432076	1.78534e-08	961.338	0.464146	Tetratricopeptide repeat 38	0.6805		unknown
CGI_10028398	0.403058	0.00802981	248.941	0.594298	3.23425e-09	245.188	0.394564	5.02169e-06	255.265	0.463973	dimethylaniline monooxygenase [N-oxide-forming] 5 isoform X2	0.8085		GO:0005789;GO:0050661;GO:0050660;GO:0016021;GO:0055114;GO:0004499
CGI_10005875	0.418793	0.0171247	870.695	0.388095	0.00266244	914.79	0.584639	1.30226e-07	849.028	0.463842	glycogen debranching enzyme-like	0.7085		GO:0005980;GO:0004135;GO:0004134
CGI_10007168	0.519389	0.000203817	202.617	0.32275	0.0286207	223.398	0.534778	7.70711e-05	206.169	0.458972	PR domain zinc finger 15-like [Parasteatoda tepidariorum]	0.573		GO:0003676;GO:0046872
CGI_10001559	0.528918	1.61578e-07	1732.79	0.321979	0.000964503	1916.05	0.522287	3.50639e-12	1774.37	0.457728	Receptor-type tyrosine- phosphatase T	0.6625		GO:0004725;GO:0035335
CGI_10027843	0.66096	4.14259e-11	466.441	0.184633	0.0336149	558.954	0.524489	4.32819e-07	494.65	0.456694	ATP-binding cassette sub-family F member 3	0.806		GO:0016887;GO:0005524;GO:0008152
CGI_10021901	0.45607	0.000118949	116.294	0.456554	7.10935e-05	120.998	0.456001	0.000222566	119.026	0.456209	calcium calmodulin-dependent 3 ,5 -cyclic nucleotide phosphodiesterase 1A-like isoform X3	0.8055		unknown
CGI_10000157	0.348825	0.0439241	58.4119	0.368108	0.0454209	60.2738	0.647862	0.0001295	54.6228	0.454932	Replication A 32 kDa subunit	0.693		GO:0006259
CGI_10028770	0.554332	7.10878e-25	3383.54	0.51659	3.2815e-15	3553.62	0.289596	8.11786e-14	3738.23	0.453506	testican-1-like isoform X2	0.551		GO:0007165;GO:0005509;GO:0005578
CGI_10017210	0.483794	0.000986684	868.064	0.417749	0.00272154	920.617	0.453706	0.000239223	895.197	0.45175	mesenchyme-specific cell surface glyco -like [Crassostrea gigas]	0.5685		unknown
CGI_10027785	0.435017	0.000911627	112.366	0.447516	0.00685898	116.423	0.465354	0.000958045	113.872	0.449295	semaphorin-5A isoform X2	0.585		unknown
CGI_10023252	0.377566	0.00461345	1798.5	0.517011	4.54291e-05	1792.75	0.449349	0.000455316	1796.7	0.447976	switch-associated 70 isoform X1	0.5435		GO:0050794;GO:0044464;GO:0044763;GO:0005488
CGI_10008531	0.453862	2.58481e-07	1728.9	0.402702	6.88676e-07	1823.92	0.485338	3.69187e-08	1748.59	0.447301	Cystathionine gamma-lyase	0.86		GO:0030170;GO:0070814;GO:0043123;GO:1904831;GO:0044524;GO:0004123;GO:0051092;GO:0005634;GO:0070062;GO:0051289;GO:0005737;GO:0018272;GO:0044540;GO:0019343;GO:0019346;GO:2001234
CGI_10023966	0.46766	1.77516e-05	135.348	0.296891	0.00365837	148.266	0.575562	3.56817e-08	133.984	0.446704	Kelch domain-containing 2	0.607		unknown
CGI_10017264	0.512519	4.34815e-06	761.691	0.285687	0.0113958	847.698	0.540506	1.06301e-06	771.292	0.446237	sphingosine-1-phosphate phosphatase 1	0.561		GO:0016021
CGI_10011661	0.628279	1.33371e-12	528.351	0.365738	0.00168286	591.855	0.33946	0.0111801	585.81	0.444493	alpha-N-acetylgalactosaminidase [Tribolium castaneum]	0.723		GO:0005975;GO:0016021;GO:0004553
CGI_10008091	0.380112	3.95637e-07	341.436	0.650564	7.55869e-18	327.914	0.301753	4.56091e-05	357.129	0.444143	tripartite motif-containing 2-like	0.5625		GO:0008270;GO:0016567
CGI_10020729	0.392925	8.19271e-05	202.348	0.348442	0.000481679	213.114	0.590694	3.94083e-07	194.792	0.44402	---NA---	0		unknown
CGI_10001377	0.361465	0.00887566	189.14	0.585598	7.10809e-06	183.959	0.384034	0.00894547	191.677	0.443699	leucine-rich repeat-containing 74A-like	0.65		GO:0005509
CGI_10014541	0.564203	7.97377e-07	2420.24	0.316083	0.00854128	2707.67	0.447895	0.000101424	2555.53	0.442727	unconventional myosin-Id-like	0.8425		GO:0016459;GO:0005524;GO:0008152;GO:0003774
CGI_10003104	0.36697	1.49693e-06	644.146	0.524578	5.21949e-13	639.032	0.434532	3.51512e-09	644.451	0.442027	Tripartite motif-containing 3	0.6735		GO:0008270;GO:0005622;GO:0016567
CGI_10021058	0.76509	5.20209e-16	282.764	0.312003	0.000452535	334.896	0.246628	0.00321345	335.649	0.44124	Tripartite motif-containing 3	0.881		GO:0008270;GO:0005622;GO:0016567
CGI_10022787	0.244663	0.0128177	204.83	0.23024	0.0149563	213.573	0.847279	2.09872e-20	176.092	0.440728	PAB-dependent poly(A)-specific ribonuclease subunit PAN2-like	0.7965		GO:0003676;GO:0004535;GO:0005634;GO:0090503;GO:0005515;GO:0031251;GO:0010606;GO:0000291;GO:0000932;GO:0005829;GO:0006397;GO:0000289
CGI_10024869	0.343683	0.0198808	349.485	0.409252	0.00406234	355.873	0.565621	1.05358e-05	334.14	0.439519	Acidic mammalian chitinase	0.6605		GO:0004568;GO:0005975;GO:0008061;GO:0006032;GO:0016021;GO:0005576
CGI_10004058	0.536151	6.56273e-06	920.219	0.397193	0.000267592	996.546	0.384473	0.000604843	982.882	0.439272	plastin-2 isoform X2	0.742		GO:0005509
CGI_10006976	0.539449	3.72825e-09	653.847	0.374219	1.58698e-07	713.728	0.402634	4.93006e-06	694.676	0.438767	transcription initiation factor TFIID subunit 13-like	0.8965		GO:0003743;GO:0046982;GO:0006366;GO:0006413
CGI_10001633	0.682301	9.21652e-16	401.546	0.408197	9.65792e-08	451.388	0.216822	0.00323421	470.472	0.435773	Kelch 2	0.554		unknown
CGI_10002519	0.455561	1.67667e-12	1296.29	0.562672	1.87351e-16	1305.74	0.286389	3.23127e-06	1392.69	0.434874	transmembrane 256 homolog	0.721		GO:0016021
CGI_10008406	0.584745	4.83907e-13	416.982	0.473509	4.16265e-09	447.329	0.243736	0.0080108	471.403	0.433997	ubiquitin- ligase E3B-like	0.7565		GO:0004842;GO:0016874;GO:0016567
CGI_10021055	0.246884	0.0285003	261.16	0.499706	3.05367e-06	251.354	0.550235	1.70165e-09	243.422	0.432275	Tripartite motif-containing 3	0.8855		GO:0008270;GO:0005622;GO:0016567
CGI_10022250	0.50551	0.000216078	319.653	0.306816	0.0291975	352.728	0.484367	9.07629e-05	328.49	0.432231	VPS9 domain-containing 1-like [Biomphalaria glabrata]	0.6745		unknown
CGI_10008287	0.495945	5.16833e-05	127.099	0.528326	2.77641e-05	130.892	0.27177	0.0353175	138.973	0.432014	PFC0760c-like isoform X2	0.7456		unknown
CGI_10004156	0.408747	0.00102278	1494.1	0.351595	0.00740185	1579.41	0.53537	1.01323e-05	1469.28	0.431904	mitogen-activated kinase 14B-like isoform X2	0.8915		GO:0005524;GO:0000165;GO:0004707;GO:0005622
CGI_10002196	0.295983	0.0149601	723.289	0.297075	0.0119328	751.206	0.699865	5.83101e-11	656.6	0.430974	aldose 1-epimerase-like	0.704		GO:0005975;GO:0016021;GO:0030246;GO:0016853
CGI_10005767	0.617588	3.8208e-08	109.4	0.361136	0.00163792	122.604	0.313701	0.006143	122.266	0.430808	IAP-1 [Pieris rapae granulovirus]	0.597		GO:0008270;GO:0008152;GO:0016874
CGI_10004155	0.357114	0.00906971	1824.96	0.373368	0.00947631	1886.1	0.561178	7.92461e-06	1753.78	0.430553	hypothetical protein CGI_10004155	1		GO:0016021
CGI_10007217	0.432889	7.28484e-06	564.101	0.368604	0.000228057	597.834	0.487225	1.19308e-10	567.316	0.429573	tensin-1-like isoform X1 [Bombus terrestris]	0.6725		unknown
CGI_10009967	0.517469	4.71404e-12	2065.62	0.280547	0.00166431	2304.6	0.490175	6.04412e-10	2125.11	0.429397	lysosomal alpha-glucosidase-like	0.6955		GO:0005975;GO:0004553;GO:0030246
CGI_10021748	0.423165	0.00443167	119.323	0.50189	0.000416279	121.181	0.361978	0.00479337	124.34	0.429011	Tripartite motif-containing 3 [Crassostrea gigas]	0.4765		GO:0008270;GO:0005622;GO:0016567
CGI_10014953	0.509773	0.00104898	141.352	0.420388	0.000410155	151.264	0.35295	0.0106641	151.793	0.427703	tripartite motif-containing 2-like	0.5335		GO:0008270;GO:0005622;GO:0016567
CGI_10026220	0.400764	9.48526e-05	3390.33	0.548217	3.39136e-15	3377.92	0.328846	1.87977e-05	3541	0.425943	XK-related 6-like [Biomphalaria glabrata]	0.4715		GO:0016021
CGI_10003994	0.407022	0.00464947	312.629	0.310578	0.0297306	334.654	0.557115	3.33633e-05	305.344	0.424905	Multiple epidermal growth factor-like domains 6	0.617		GO:0016021
CGI_10009684	0.345101	0.000761523	178.95	0.417929	0.00138816	181.955	0.511361	1.1986e-06	173.834	0.424797	hypothetical protein CGI_10009684	0.583		unknown
CGI_10017937	0.49507	0.00677112	196.676	0.425767	0.00650416	209.092	0.351476	0.0171575	210.197	0.424104	N-acetylneuraminate lyase isoform X2	0.5535		GO:0008152;GO:0016829
CGI_10023100	0.360503	0.0217049	497.377	0.403209	0.00662052	510.152	0.49968	0.00044023	487.047	0.421131	PREDICTED: uncharacterized protein LOC105330607 isoform X1 [Crassostrea gigas]	0.9577		unknown
CGI_10004161	0.499326	0.000497913	75.1276	0.327762	0.0313418	82.1438	0.433422	0.00830188	78.1541	0.42017	26S proteasome non-ATPase regulatory subunit 11	0.811		GO:0000502
CGI_10017458	0.371757	2.25837e-08	495.103	0.333226	8.52791e-05	520.476	0.555265	2.76524e-13	479.168	0.420083	ankyrin repeat [Trichomonas vaginalis G3]	0.4895		unknown
CGI_10017796	0.4773	4.03445e-07	565.898	0.354425	0.000164665	610.192	0.42586	1.9129e-05	586.448	0.419195	Engulfment and cell motility 1	0.7805		unknown
CGI_10012318	0.489225	4.07957e-07	230.201	0.341293	0.00244972	250.082	0.425214	9.19692e-07	239.535	0.418577	GTPase IMAP family member 4	0.816		GO:0005525
CGI_10017795	0.499063	1.88881e-07	174.247	0.21062	0.0391336	197.789	0.544661	2.44588e-08	175.618	0.418115	N-acetylglucosamine-1-phosphodiester alpha-N-acetylglucosaminidase	0.6355		GO:0016021
CGI_10004459	0.596678	7.0832e-10	351.966	0.249268	0.0173278	405.827	0.406345	0.000141331	379.749	0.41743	caspase-7 isoform X2	0.674		GO:0006508;GO:0006915;GO:0004197
CGI_10004453	0.444005	0.00115285	125.265	0.471781	0.000228135	129.063	0.336111	0.0167858	132.398	0.417299	choline transporter 2 isoform X2	1		unknown
CGI_10021027	0.462042	0.00121906	684.253	0.391432	0.0140786	725.886	0.390966	0.00708141	713.634	0.414814	proline-rich 5-like isoform X2	0.638		unknown
CGI_10013928	0.31094	0.0040624	415.342	0.366426	5.38531e-05	424.158	0.56163	6.37893e-10	393.565	0.412998	ribonucleoside-diphosphate reductase small chain-like	0.856		GO:0005635;GO:0005515;GO:0004748;GO:0046872;GO:0006260;GO:0009186;GO:0009263;GO:0055114;GO:0005971;GO:0051290
CGI_10000712	0.44671	1.86046e-05	724.956	0.577788	3.86031e-09	725.647	0.21339	0.00861417	796.472	0.412629	hypothetical protein CGI_10000712	0.7814		GO:0016021
CGI_10019387	0.385286	0.0150443	555.021	0.368841	0.0109979	579.879	0.479165	0.000647663	551.031	0.411097	Sn1-specific diacylglycerol lipase alpha	0.724		GO:0006629;GO:0016021;GO:0016787
CGI_10013735	0.426086	0.00434302	236.992	0.416031	0.0187255	246.534	0.390936	0.00375859	244.523	0.411018	probable pyridoxal 5 -phosphate synthase subunit pdx2 isoform X4 [Lingula anatina]	0.6975		GO:0004359;GO:0042823;GO:0006541;GO:0042819;GO:0016740
CGI_10024744	0.463191	2.35448e-09	348.967	0.372054	1.50555e-06	372.62	0.395465	8.56817e-07	363.382	0.410237	MOB phocein isoform X1	0.917		GO:0032580;GO:0043025;GO:0006457;GO:0044822;GO:0005524;GO:0048471;GO:0070062;GO:0006900;GO:0046872;GO:0005739;GO:0043197;GO:0051087;GO:0001649;GO:0005829;GO:0016310;GO:0016301;GO:0019900
CGI_10011192	0.364927	0.000161013	616.18	0.468285	1.89095e-08	621.083	0.395152	1.183e-05	623.607	0.409454	Kinesin KIF14	0.6935		GO:0005524;GO:0003777;GO:0030900;GO:0050794;GO:0051234;GO:0008152;GO:0007018;GO:0005874;GO:0008017
CGI_10015172	0.418885	3.04014e-07	349.993	0.505111	5.10316e-09	354.682	0.303556	0.00018673	370.482	0.409184	Organic cation transporter	0.68		GO:0055085;GO:0022857;GO:0016021
CGI_10003149	0.588225	1.08723e-11	650.816	0.250142	0.0015073	748.202	0.388722	1.15083e-05	704.173	0.409029	ankyrin repeat domain-containing 10-like isoform X9 [Lingula anatina]	0.637		unknown
CGI_10026698	0.549483	2.71874e-07	181.536	0.239085	0.0240673	207.391	0.436545	3.64358e-05	191.849	0.408371	adhesion G -coupled receptor L2-like	0.5565		GO:0004930;GO:0007186;GO:0016021
CGI_10007507	0.484602	2.87351e-18	825.308	0.42704	2.48141e-12	872.299	0.312473	5.93374e-07	887.711	0.408038	WD repeat-containing 11-like	0.728		GO:0044424
CGI_10019016	0.553771	0.000126391	105.544	0.369199	0.0176455	115.714	0.292966	0.0458698	116.513	0.405312	adenylate kinase isoenzyme 5-like	0.685		unknown
CGI_10025192	0.32356	0.00275658	2711.37	0.279185	0.0109354	2856.62	0.612641	3.97199e-09	2542.15	0.405129	actin-interacting 1 isoform X2	0.6905		unknown
CGI_10004369	0.503221	6.36163e-05	119.221	0.287752	0.0157687	132.177	0.421451	0.000447755	124.629	0.404141	hypothetical protein CGI_10004369	0.835		unknown
CGI_10007727	0.308223	0.000780015	450.622	0.295485	0.00118304	469.865	0.605664	1.36227e-14	421.502	0.403124	peptide methionine sulfoxide reductase-like	0.7005		GO:0008152;GO:0016671
CGI_10000093	0.341943	0.00435075	159.489	0.494905	6.02894e-06	158.143	0.371847	0.000619055	161.204	0.402898	Growth hormone-inducible transmembrane	0.7275		GO:0016021
CGI_10010451	0.419357	1.43275e-05	173.806	0.446393	5.22788e-06	179.292	0.338754	0.000469783	182.041	0.401501	domain-containing 7	0.766		unknown
CGI_10010609	0.398025	1.25065e-05	506.798	0.480128	1.61076e-07	513.898	0.323486	0.000406053	529.316	0.400546	hypothetical protein CGI_10010609	0.686		unknown
CGI_10017915	0.499689	1.57282e-08	284.78	0.433156	6.27139e-06	301.804	0.267681	0.0144701	312.072	0.400175	thiopurine S-methyltransferase	0.662		GO:0008757;GO:0032259
CGI_10004027	0.398914	3.41091e-05	292.974	0.469735	2.77006e-05	298.28	0.329894	0.000799799	305.772	0.399514	epithelial-stromal interaction 1-like	0.54		unknown
CGI_10016077	0.294547	8.13995e-05	361.07	0.436235	2.11656e-07	359.008	0.467449	8.4043e-10	349.741	0.39941	Ubiquitin-associated domain-containing 1	0.66		unknown
CGI_10019801	0.514558	2.5723e-08	2898.11	0.294295	0.00455314	3217.19	0.38806	9.81902e-05	3070.58	0.398971	Fructose-bisphosphate aldolase	0.862		GO:0006096;GO:0004332
CGI_10017973	0.500061	9.42698e-07	234.103	0.286233	0.00502498	259.411	0.408723	7.04649e-06	245.591	0.398339	GTPase IMAP family member 7-like [Crassostrea gigas]	0.616		GO:0005525
CGI_10018191	0.272998	0.0301013	556.876	0.426062	0.000182874	551.914	0.495562	8.10162e-07	531.569	0.398208	Syntaxin-6	0.6935		GO:0016021;GO:0005622;GO:0048193
CGI_10005324	0.591361	0.00030289	104.464	0.266663	0.0491938	120.111	0.32676	0.0133338	115.699	0.394928	leucine-rich repeat-containing 74B-like	0.623		GO:0008063
CGI_10023513	0.354236	0.000323266	3258.43	0.349836	0.000781399	3390	0.478263	1.20734e-06	3204.78	0.394112	Integrin alpha-4	0.678		GO:0007229;GO:0007155;GO:0008305
CGI_10015665	0.295074	0.0333339	82.3725	0.426752	0.00115861	82.2186	0.457189	0.000610732	80.0128	0.393005	mitochondrial thiamine pyrophosphate carrier-like [Biomphalaria glabrata]	0.6825		GO:0055085;GO:0016021
CGI_10026938	0.387613	1.16994e-06	344.702	0.504393	7.27039e-08	345.917	0.286572	0.000663637	362.845	0.392859	histidine triad nucleotide-binding 3	0.7385		unknown
CGI_10002695	0.180491	0.0155854	406.086	0.478271	1.91599e-08	384.833	0.51883	1.72741e-14	373.902	0.39253	proteasome-activating [Pediculus humanus corporis]	0.675		GO:0005524;GO:0005856;GO:0016021
CGI_10005462	0.71568	1.27543e-14	946.656	0.287326	2.43933e-07	1114.54	0.174266	0.0414276	1134.61	0.392424	delta(14)-sterol reductase-like	0.7885		GO:0016627;GO:0005737;GO:0006629;GO:0016021;GO:0055114
CGI_10026055	0.358538	0.0418884	92.3964	0.313136	0.0476894	97.564	0.504854	0.000814979	90.5707	0.392176	Actinorhodin polyketide dimerase	0.691		GO:0042602;GO:0010181;GO:0055114
CGI_10011899	0.335912	0.00126254	1522.47	0.275688	0.00887644	1612.02	0.562923	2.6051e-08	1453.16	0.391507	copine-3-like isoform X2	0.7995		GO:0044424;GO:0043227
CGI_10016701	0.338701	0.0153181	359.911	0.352542	0.0101062	372.345	0.48211	0.000266109	351.852	0.391118	dual adapter for phosphotyrosine and 3-phosphotyrosine and 3-phosphoinositide-like isoform X1 [Crassostrea gigas]	0.7105		unknown
CGI_10027280	0.231598	0.0244744	546.712	0.480309	8.52336e-08	526.447	0.461189	2.5083e-09	520.273	0.391032	enhancer of split m7 -like	0.64		GO:0005634;GO:0003677;GO:0005615;GO:0004866;GO:0006351;GO:0006355;GO:0010951;GO:0046983
CGI_10023930	0.291606	0.0259343	241.267	0.27257	0.0221776	252.356	0.60834	4.14482e-08	224.311	0.390839	glutathione gamma-glutamylcysteinyltransferase 1-like [Octopus bimaculoides]	0.647		GO:0046938;GO:0016756;GO:0046872;GO:0010038
CGI_10012333	0.41342	6.602e-05	401.697	0.230452	0.023602	441.922	0.528225	1.06299e-08	396.465	0.390699	alpha-centractin [Crassostrea gigas]	0.9555		GO:0005525;GO:0005524;GO:0005813;GO:0043209;GO:0070062;GO:1990752;GO:0005737;GO:0005869;GO:0007264
CGI_10004851	0.368427	2.34614e-08	585.221	0.383601	4.03984e-06	604.973	0.417107	1.03532e-06	588.644	0.389712	GPI transamidase component PIG-S	0.6225		GO:0016255;GO:0042765
CGI_10020500	0.417633	9.68622e-07	780.618	0.457925	2.24587e-06	801.401	0.291284	0.00304533	828.278	0.388947	Transcriptional-regulating factor 1	0.625		GO:0005634;GO:0003677;GO:0046872
CGI_10001020	0.423136	0.00444646	103.61	0.397938	0.00611078	108.706	0.3454	0.0378233	108.33	0.388825	hypothetical protein CGI_10001020	0.8433		unknown
CGI_10018115	0.339059	0.00219061	399.206	0.336696	0.000102829	415.05	0.489193	1.66285e-09	389.944	0.388316	phosphomannomutase 2-like	0.8115		GO:0005737;GO:0004615;GO:0009298
CGI_10026680	0.211423	0.0407346	291.224	0.532042	4.79387e-08	274.331	0.419062	8.90898e-07	278.798	0.387509	misato homolog 1-like	0.597		GO:0003924;GO:0008152
CGI_10026054	0.330357	0.00138587	4744.42	0.283166	0.0022754	5004.1	0.548758	8.46596e-12	4541.71	0.387427	60 kDa SS-A Ro ribonucleo	0.6855		GO:0030529;GO:0034336;GO:0019013;GO:0044699
CGI_10013008	0.299501	0.002784	986.763	0.479651	8.83786e-06	970.432	0.381561	0.000266646	981.931	0.386904	synaptojanin-1 isoform X2	0.7525		GO:0000166;GO:0042578;GO:0046856
CGI_10009725	0.312339	0.00747002	415.375	0.485993	3.19224e-08	410.027	0.362326	0.00177929	417.86	0.386886	inhibitor of nuclear factor-kappaB	0.613		GO:0008063;GO:0050776
CGI_10027925	0.374875	0.000580565	254.344	0.297498	0.00556855	270.769	0.488046	2.02228e-05	251.104	0.386806	neuroglobin-like isoform X4 [Aplysia californica]	0.6795		GO:0019825;GO:0015671;GO:0005344;GO:0020037
CGI_10020976	0.487238	0.000182385	275.879	0.357651	0.000371181	298.188	0.315282	0.00425332	296.777	0.386724	Elongation of very long chain fatty acids 4	0.5995		GO:0016021;GO:0016740;GO:0006633
CGI_10005853	0.473127	0.00128525	79.4356	0.373474	0.00845768	84.9856	0.30829	0.0299837	85.3117	0.384964	F-box only partial	0.4745		unknown
CGI_10006952	0.359574	1.79923e-05	2754.26	0.451681	3.15091e-08	2783.76	0.340103	5.39649e-05	2828.53	0.383786	drebrin B isoform X3	0.7565		GO:0051015;GO:0007416;GO:0097178;GO:0048812;GO:0006898;GO:0005622
CGI_10007226	0.512547	1.06831e-06	419.588	0.38841	2.76847e-05	452.655	0.249788	0.00573477	464.136	0.383582	inositol polyphosphate 5-phosphatase K isoform X3 [Chrysemys picta bellii]	0.63		GO:0016787;GO:0046856
CGI_10001558	0.252344	0.00219114	465.384	0.360912	5.01605e-05	467.588	0.535581	1.52466e-13	436.613	0.382946	Neutral and basic amino acid transport rBAT	0.7075		GO:0005975;GO:0003824;GO:0016021;GO:0043169
CGI_10021260	0.421471	0.00128334	1633.63	0.423494	0.000606561	1697	0.303206	0.00614672	1730.55	0.382724	Ribonuclease H1	0.6415		GO:0003676;GO:0090502;GO:0004523;GO:0016021;GO:0043137
CGI_10011157	0.384679	5.57431e-06	625.356	0.422604	1.22646e-06	642.54	0.337984	1.18223e-05	647.639	0.381755	Appr-1-p processing	0.5835		GO:0016740
CGI_10026507	0.216826	0.00318101	554.769	0.387759	1.09382e-07	546.385	0.537468	7.43861e-15	514.041	0.380685	F-box WD repeat-containing 5-like	0.638		unknown
CGI_10020465	0.614532	1.51432e-10	299.902	0.256075	0.0333584	346.864	0.270722	0.00535291	339.125	0.380443	transmembrane 183-like	0.5765		unknown
CGI_10026330	0.338343	0.000873058	421.168	0.361538	0.000152232	434.743	0.440996	2.78206e-07	417.095	0.380292	and PH domain-containing 1-like	0.651		GO:0035023;GO:0046872;GO:0005089;GO:0043547
CGI_10003602	0.55423	1.11269e-06	278.011	0.27763	0.0199413	314.196	0.307155	0.0118115	305.81	0.379672	deoxyhypusine synthase	0.8585		GO:0050983;GO:0005515;GO:0051289;GO:0042593;GO:0005829;GO:0034038;GO:0042102;GO:0008612;GO:0006412
CGI_10012814	0.287765	0.02865	313.986	0.354875	1.06514e-05	320.011	0.49584	6.77486e-10	301.099	0.379493	targeting for Xklp2 isoform X2	0.6195		GO:0005819;GO:0032147;GO:0060236;GO:0005874
CGI_10004755	0.253488	0.00105079	1306.17	0.310746	2.39258e-05	1333.18	0.573068	1.99106e-20	1212.49	0.379101	hypothetical protein CGI_10004755	0.639		unknown
CGI_10006202	0.373838	0.000786215	187.391	0.491918	3.28394e-06	187.892	0.269587	0.0195131	197.464	0.378448	[Monosiga brevicollis MX1]	0.6045		unknown
CGI_10020312	0.434018	0.000302955	269.947	0.362644	0.000157502	286.793	0.330525	0.00123327	284.717	0.375729	cyclin-dependent kinase 20	0.9025		GO:0051301;GO:0005634;GO:0005524;GO:0060271;GO:0005737;GO:0007275;GO:0005929;GO:0004693;GO:0006468;GO:0007049
CGI_10022043	0.36382	0.0395176	159.723	0.441513	0.00117455	162.376	0.320501	0.0188625	165.529	0.375278	Chitobiosyldiphosphodolichol beta-mannosyltransferase	0.719		GO:0070085;GO:0000030;GO:0016020
CGI_10005407	0.17006	0.0133332	1607.99	0.392537	0.000295643	1556.29	0.557616	8.51443e-18	1458.78	0.373404	mitochondrial carrier homolog 2-like	0.654		GO:0070585;GO:0016021;GO:0005741;GO:0005743;GO:0097284;GO:1902108
CGI_10003699	0.397728	1.37792e-05	312.749	0.322768	0.000350146	332.432	0.394419	1.12865e-05	319.398	0.371638	spliceosome-associated CWC15 homolog	0.789		GO:0003723;GO:0005515;GO:0071013;GO:0005654;GO:0000398
CGI_10002395	0.361027	2.61362e-06	433.57	0.540727	2.23455e-10	427.196	0.208775	0.0126315	464.542	0.370176	calpain-B-like isoform X1 [Priapulus caudatus]	0.678		GO:0005509;GO:0006508;GO:0004198;GO:0005622
CGI_10024760	0.549117	1.00268e-05	9462.81	0.295793	0.0127708	10614.2	0.262181	0.0306185	10539.6	0.369031	myoferlin-like isoform X4	0.9355		GO:0016021
CGI_10011039	0.389128	0.00663144	263.978	0.288394	0.0230796	283.174	0.428642	0.000250354	266.451	0.368721	hypothetical protein CGI_10011039	0.95		unknown
CGI_10015977	0.326716	0.0397113	133.38	0.442274	0.000640165	133.947	0.333145	0.0193408	136.099	0.367378	glyco -N-acetylgalactosamine 3-beta-galactosyltransferase 1-like	0.9325		unknown
CGI_10003064	0.282242	0.0277438	130.302	0.401229	0.000761818	130.499	0.411648	0.00242008	127.846	0.36504	Dehydrogenase reductase SDR family member on chromosome X	0.6225		GO:0016021
CGI_10026490	0.318727	0.0082522	123.839	0.390861	0.000862203	125.88	0.383099	0.000670839	123.914	0.364229	Actin- partial [Schistosoma haematobium]	0.726		unknown
CGI_10015053	0.343234	0.00125379	486.104	0.261101	0.0246539	518.246	0.487449	4.77057e-06	475.228	0.363928	inositol 1,4,5-trisphosphate receptor-like	0.821		GO:0005789;GO:0048016;GO:0007275;GO:0016021;GO:0005220;GO:0070588;GO:0007338
CGI_10016864	0.380119	6.25844e-08	588.13	0.352293	5.18809e-06	616.127	0.358248	0.00036803	604.229	0.363553	RNA polymerase-associated LEO1	0.7995		GO:0019827;GO:0045638;GO:0010390;GO:0014032;GO:0021529;GO:0048701;GO:0005730;GO:0021782;GO:0006378;GO:0006368;GO:0032968;GO:0007507;GO:0005813;GO:0030318;GO:1990269;GO:0001711;GO:0016593;GO:0031442;GO:0016055;GO:0050936;GO:0033523
CGI_10021791	0.486163	1.24488e-06	268.933	0.231319	0.0179254	302.308	0.371603	0.000218709	284.242	0.363028	F-box LRR-repeat 21-like [Crassostrea gigas]	0.5611		unknown
CGI_10005033	0.371608	0.000977163	229.451	0.371544	0.000354655	238.797	0.339684	0.00620242	236.561	0.360945	ubiquitin carboxyl-terminal hydrolase 22	0.78		GO:0008270;GO:0003713;GO:0048522;GO:0006355;GO:0000124;GO:0036459;GO:0006511;GO:0016578
CGI_10016200	0.311464	0.0163279	181.516	0.311333	0.0107982	188.616	0.455314	0.000237009	177.344	0.35937	kinase C alpha type-like	0.8745		GO:0008270;GO:0034351;GO:0090330;GO:0005783;GO:0045785;GO:0005886;GO:0043536;GO:0045766;GO:0045931;GO:0004697;GO:0005524;GO:0002159;GO:0070062;GO:0035408;GO:0005739;GO:0070555;GO:0005829;GO:0001938;GO:0018105;GO:0031666;GO:0035556;GO:0019899;GO:0035403
CGI_10004871	0.289823	0.0165256	226.503	0.464001	1.08778e-06	223.345	0.32392	0.00631896	228.984	0.359248	Endoplasmic reticulum aminopeptidase 1	0.5769		GO:0008270;GO:0006508;GO:0016021;GO:0004177;GO:0008237
CGI_10025173	0.246748	0.00184306	617.401	0.216463	0.0168513	647.517	0.611243	3.48996e-20	565.55	0.358151	Proline- glutamic acid- and leucine-rich 1	0.884		GO:0005337;GO:0008270;GO:0008152;GO:0016021;GO:1901642;GO:0016874
CGI_10020447	0.349837	0.000737246	10207.8	0.344029	0.00204085	10623.1	0.376792	0.000213903	10334.9	0.356886	plastin-2 isoform X2	0.793		GO:0004514;GO:0003779;GO:0009435
CGI_10004091	0.373544	0.0155854	5289.79	0.32777	0.0334913	5575.43	0.36814	0.017017	5408.72	0.356485	polypyrimidine tract-binding 2-like isoform X1 [Biomphalaria glabrata]	0.843		GO:0000166;GO:0005634;GO:0003723;GO:0045595;GO:0006397
CGI_10020725	0.41843	2.04435e-06	478.678	0.468909	6.4653e-07	489.86	0.18184	0.0349273	526.52	0.356393	solute carrier family 35 member F6-like	0.7275		GO:0016021;GO:0006810
CGI_10012570	0.420594	0.000134072	135.292	0.286031	0.00808734	146.517	0.359643	0.000776921	140.795	0.355423	cyclin-dependent-like kinase 5	0.898		GO:0051301;GO:0005524;GO:0004672;GO:0006468
CGI_10027619	0.350565	0.000282104	468.101	0.363826	0.000293175	484.474	0.350741	0.000263607	477.801	0.355044	thymidine phosphorylase [Lepisosteus oculatus]	0.708		GO:0004645;GO:0006206;GO:0009032;GO:0005829;GO:0016154;GO:0006220;GO:0006213
CGI_10002649	0.391712	2.72053e-05	780.451	0.328654	0.000580525	827.046	0.34352	0.00103683	808.812	0.354629	tetratricopeptide repeat 40 isoform X1 [Chrysemys picta bellii]	0.647		GO:0009987
CGI_10013374	0.347754	1.96578e-06	414.034	0.316853	0.000260775	434.111	0.39695	9.68286e-06	416.429	0.353852	N-acetylglucosamine-1-phosphotransferase subunits alpha beta-like	0.66		GO:0003735;GO:0005509;GO:0016021;GO:0016772;GO:0005840;GO:0006412
CGI_10021110	0.518566	7.09185e-08	237.199	0.324192	0.000704474	261.369	0.214122	0.04193	265.823	0.352293	sodium hydrogen exchanger 9-like isoform X3 [Crassostrea gigas]	0.8775		GO:0015385;GO:0016021;GO:1902600;GO:0035725;GO:0006885
CGI_10014960	0.36868	0.000231877	248.914	0.222877	0.0235857	270.959	0.464131	2.48603e-07	247.117	0.351896	tubulin delta chain-like	0.6515		GO:0005525;GO:0003924;GO:0008152;GO:0016021;GO:0005200;GO:0005874;GO:0007017
CGI_10026329	0.39746	2.09716e-08	2067.57	0.322652	5.22213e-07	2198.52	0.329641	8.65285e-09	2155.67	0.349918	and PH domain-containing 2-like	0.5995		GO:0035023;GO:0046872;GO:0005089;GO:0043547
CGI_10020206	0.287025	2.01075e-05	2266.44	0.378887	3.06625e-20	2290.06	0.382592	4.12766e-11	2247.05	0.349502	FUN14 domain-containing 1	0.703		GO:0031307;GO:0000422
CGI_10026428	0.413805	0.000219741	183.59	0.238124	0.0332387	201.521	0.393288	0.000786822	188.864	0.348406	DNA fragmentation factor subunit alpha-like	0.6555		GO:0006915;GO:0005622
CGI_10014679	0.348875	0.0472723	129.904	0.420663	0.00234385	132.212	0.274856	0.04241	135.914	0.348131	death domain-containing CRADD	0.619		GO:0005515;GO:0048522;GO:0051716;GO:0042981
CGI_10012222	0.373112	9.31484e-05	513.402	0.224803	0.00349578	559.241	0.445678	7.61135e-06	513.094	0.347864	ectonucleotide pyrophosphatase phosphodiesterase family member 5-like	0.6395		GO:0003824;GO:0008152;GO:0016021
CGI_10007718	0.302617	0.0100133	321.068	0.314726	0.00272339	332.809	0.423974	2.7077e-05	316.173	0.347106	serine threonine- kinase pats1	0.629		GO:0005525;GO:0007264;GO:0005509;GO:0016310;GO:0016301;GO:0005622;GO:0008063
CGI_10024146	0.310955	0.000429886	439.045	0.277304	0.000320043	460.93	0.452757	5.30322e-07	429.16	0.347005	monocarboxylate transporter 12-like [Octopus bimaculoides]	0.614		GO:0055085;GO:0016021
CGI_10027265	0.385479	0.000282463	236.996	0.336553	0.00357364	249.931	0.318233	0.00486558	246.966	0.346755	NTF2-related export partial	0.7195		GO:0006810;GO:0005622
CGI_10001127	0.353135	0.00910528	1009.72	0.405234	0.000432528	1032.99	0.281726	0.0189464	1054.44	0.346698	hypothetical protein CGI_10001127	1		unknown
CGI_10022247	0.350579	0.00078377	257.878	0.313212	0.00275456	270.936	0.369976	0.00129439	261.388	0.344589	Tyrosine- phosphatase Lar	0.695		unknown
CGI_10022483	0.379259	0.000148049	6635.23	0.283337	0.00652804	7102.02	0.369417	0.000164963	6793.97	0.344004	Adenylyl cyclase-associated 1	0.7055		GO:0003779;GO:0007010;GO:0000902
CGI_10011937	0.253542	0.00515931	432.821	0.239551	0.0201431	451.673	0.538821	8.37272e-10	405.408	0.343971	monocarboxylate transporter 5-like isoform X2 [Crassostrea gigas]	0.562		GO:0055085;GO:0016021
CGI_10004437	0.252486	0.00501804	589.493	0.261952	0.00509935	610.463	0.514344	9.94479e-10	556.114	0.342927	Xylulose kinase	0.7245		GO:0016887;GO:0005524;GO:0005997;GO:0004856;GO:0005737;GO:0046835
CGI_10018852	0.29608	0.000628379	300.799	0.440195	1.1576e-08	299.255	0.291862	0.000618981	307.445	0.342712	ankyrin repeat and SAM domain-containing 3 isoform X1	0.717		unknown
CGI_10014644	0.387644	0.000685603	353.51	0.292148	0.0132417	378.487	0.345558	0.00316627	365.567	0.341783	mitogen-activated kinase kinase kinase 1 [Alligator mississippiensis]	0.684		GO:0005524;GO:0008270;GO:0004672;GO:0006468
CGI_10016854	0.444481	2.09638e-05	151.051	0.291387	0.00563071	164.425	0.287677	0.0119094	161.72	0.341182	2-aminoethanethiol dioxygenase-like	0.57		GO:0016702;GO:0055114
CGI_10025668	0.407959	5.27547e-11	1846.79	0.294452	6.34211e-06	1986.61	0.320492	1.31162e-06	1935.97	0.340968	Tyrosine- phosphatase non-receptor type 1	0.743		GO:0004725;GO:0016021;GO:0035335
CGI_10023102	0.317788	0.0276213	149.673	0.354564	0.00668147	153.833	0.349766	0.0142674	151.446	0.340706	Rho guanine nucleotide exchange factor 12	0.9895		unknown
CGI_10022009	0.241141	0.000373647	792.975	0.311514	1.75593e-05	805.543	0.469202	1.24795e-14	754.964	0.340619	required for meiotic nuclear division 1 homolog	0.7265		unknown
CGI_10027298	0.333991	1.79807e-06	2326.34	0.374547	9.63265e-10	2388.12	0.313298	5.03353e-06	2390.53	0.340612	WD repeat and FYVE domain-containing 3	0.786		GO:0046872
CGI_10013782	0.384862	0.00465617	168.226	0.315808	0.0101005	178.69	0.319428	0.0280373	175.228	0.340033	0	0		unknown
CGI_10023093	0.207671	0.0474947	445.705	0.520889	5.18892e-07	420.692	0.286294	0.00500993	443.698	0.338285	PREDICTED: uncharacterized protein LOC105330599 [Crassostrea gigas]	1		GO:0016021
CGI_10021178	0.362955	0.0100893	1999.73	0.331225	0.0205706	2098.18	0.318445	0.0258319	2069.73	0.337542	SH2 domain-containing adapter F	0.7635		GO:0008283;GO:0001568;GO:0045595;GO:0048522;GO:0030097;GO:0044763;GO:0048523;GO:0051239;GO:0050778
CGI_10016747	0.326532	5.55852e-05	908.982	0.408411	1.47772e-08	921.45	0.274559	0.000633484	943.258	0.336501	ubiquitin-associated and SH3 domain-containing B-like	0.6065		unknown
CGI_10005983	0.31702	0.000166218	436.514	0.361266	9.26088e-05	447.25	0.330813	0.00119726	443.539	0.336366	coiled-coil domain-containing 22 homolog	0.718		GO:2000060;GO:0097602
CGI_10005878	0.358746	9.22571e-08	925.865	0.319257	8.66721e-06	974.005	0.32993	2.79291e-06	953.814	0.335977	zinc finger ZZ-type and EF-hand domain-containing 1-like	0.5815		GO:0008270;GO:0005509
CGI_10019246	0.234617	0.00895964	256.164	0.419154	0.000465185	251.313	0.35139	0.000732265	252.074	0.335054	TCDD-inducible poly [ADP-ribose] polymerase	0.794		GO:0008270;GO:0008152;GO:0071466;GO:0003950
CGI_10011195	0.230251	0.0250975	370.662	0.292008	0.000550233	377.665	0.482785	4.07681e-10	350.1	0.335015	tryptophan 2,3-dioxygenase-like [Biomphalaria glabrata]	0.727		GO:0004833;GO:0046872;GO:0006727;GO:0019441;GO:0019442;GO:0055114;GO:1901216;GO:0048072;GO:0020037
CGI_10015045	0.366545	0.0117509	71.2311	0.297609	0.0419306	75.5794	0.337776	0.0226028	73.3041	0.333977	Acetyl- cytosolic	0.8245		GO:0003985;GO:0008152
CGI_10006790	0.442797	1.61285e-06	541.505	0.31241	0.00583934	585.097	0.242739	0.00548999	588.031	0.332649	glycerol-3-phosphate dehydrogenase [NAD(+)] cytoplasmic-like	0.7935		GO:0005975;GO:0042803;GO:0009331;GO:0051287;GO:0046168;GO:0055114;GO:0004367
CGI_10026052	0.188475	0.0444972	1467.58	0.423832	2.99796e-07	1417.19	0.382057	3.30965e-07	1409.93	0.331455	60 kDa SS-A Ro ribonucleo	0.6615		GO:0003723;GO:0030529;GO:0019013
CGI_10015560	0.28307	0.0480253	127.89	0.330596	0.00521753	130.858	0.380652	0.00211494	126.572	0.331439	RAB6-interacting golgin	0.664		unknown
CGI_10011371	0.333412	0.00891222	556.637	0.419616	4.42762e-07	563.879	0.240168	0.0031091	585.707	0.331065	Enoyl- hydratase domain-containing mitochondrial	0.764		GO:0003824;GO:0008152
CGI_10008469	0.35019	4.0991e-05	2984.77	0.308107	0.000188212	3142.02	0.334871	3.86474e-05	3061.55	0.331056	ceramide glucosyltransferase-like	0.7635		GO:0016757;GO:0008152;GO:0016021
CGI_10011644	0.32944	0.00281538	235.543	0.348069	0.00218323	243.357	0.314528	0.00196327	241.85	0.330679	sentrin-specific protease 1-like	0.747		GO:0005634;GO:0016926;GO:0004175;GO:0016929
CGI_10008297	0.232179	0.00746116	260.707	0.398146	0.000338866	257.28	0.348727	0.00130443	256.595	0.326351	two pore calcium channel 1-like	0.762		GO:0034220;GO:0016021;GO:0034765;GO:0005244
CGI_10000941	0.327598	4.74231e-07	727.006	0.390866	1.85012e-08	740.928	0.260405	9.21858e-05	758.087	0.32629	DENN domain-containing 1A-like [Priapulus caudatus]	0.7525		unknown
CGI_10027530	0.251749	2.34688e-05	982.776	0.544412	6.45206e-14	935.528	0.180638	0.00391784	1026.9	0.3256	mucin-4-like isoform X2	0.616		GO:0007160;GO:0004930;GO:0007186;GO:0005509;GO:0016021;GO:0016311;GO:0005201;GO:0005578;GO:0003993
CGI_10007935	0.327977	1.92307e-05	3362.87	0.308193	2.90079e-05	3515.75	0.339526	1.91842e-06	3420.97	0.325232	tyrosine- kinase CSK-like isoform X1 [Crassostrea gigas]	0.7495		GO:0005524;GO:0018108;GO:0004715
CGI_10015073	0.345845	4.52053e-06	955.462	0.226794	0.0224467	1030.79	0.40068	3.73662e-07	959.439	0.32444	extended synaptotagmin-1-like isoform X3	0.6825		unknown
CGI_10010656	0.426526	2.06692e-07	1478.88	0.301049	6.44192e-05	1597.04	0.242179	0.00449377	1598.26	0.323251	neural Wiskott-Aldrich syndrome -like isoform X2	0.703		GO:0003779;GO:0007015;GO:2000601;GO:0006897
CGI_10012815	0.227718	0.0305669	1029.09	0.35683	0.00586873	1026.25	0.382325	0.00159148	1000.52	0.322291	Vacuolar sorting-associated partial	0.5975		unknown
CGI_10012864	0.312162	0.000175405	1671.85	0.416672	2.50578e-07	1682.65	0.237235	0.00677264	1747.64	0.322023	dedicator of cytokinesis 3 isoform X2	0.571		GO:0007264;GO:0005085;GO:0005622;GO:0043547
CGI_10008520	0.332331	0.00169601	226.348	0.312816	0.000516988	236.914	0.319864	0.000440787	232.183	0.32167	solute carrier family 23 member 1-like	0.7665		GO:0055085;GO:0016021;GO:0005215
CGI_10023775	0.32964	0.0147231	576.061	0.31195	0.00171025	602.157	0.323263	0.000135541	589.884	0.321617	Ribonucleoside-diphosphate reductase large subunit	0.9		GO:0005524;GO:0070062;GO:0004748;GO:0006260;GO:0009263;GO:0055114;GO:0005971;GO:0051290
CGI_10014480	0.238668	0.00390593	538.683	0.22177	0.00143417	562.626	0.500593	3.28553e-15	508.047	0.320344	hepatocyte growth factor-regulated tyrosine kinase substrate-like isoform X2	0.7645		GO:0046872;GO:0016310;GO:0006886;GO:0016301;GO:0005622
CGI_10026030	0.285174	0.000247197	704.655	0.278489	0.00274511	733.348	0.39707	9.04546e-06	694.598	0.320244	Ectonucleoside triphosphate diphosphohydrolase 5	0.553		GO:0008152;GO:0016787
CGI_10004417	0.22857	0.0159136	3337.5	0.289545	0.00451872	3400.47	0.442313	3.18706e-06	3188.75	0.320143	dedicator of cytokinesis 7-like isoform X4	0.7165		GO:0007264;GO:0005085;GO:0005622;GO:0043547
CGI_10005597	0.272753	0.018383	169.561	0.454892	0.000103146	166.629	0.230259	0.0440363	175.475	0.319301	PREDICTED: uncharacterized protein LOC105330015 [Crassostrea gigas]	0.512		GO:0016790;GO:0006633
CGI_10017797	0.26652	0.000648897	1661.66	0.279494	4.51032e-06	1719.96	0.409236	1.74184e-12	1624.08	0.318417	Engulfment and cell motility 1	0.778		unknown
CGI_10012387	0.282731	0.00155658	2953.84	0.191092	0.0293221	3160.83	0.479915	1.07481e-08	2840.21	0.317913	Phospholipid scramblase 2	0.69		GO:0050794;GO:0046872;GO:0043231;GO:0016021;GO:0044444;GO:0044763;GO:0005102;GO:0048518;GO:0005886;GO:0050776
CGI_10020847	0.299038	1.81705e-11	5459.55	0.349744	4.12291e-09	5584.72	0.304649	1.2381e-08	5564.04	0.31781	Nicotinamide riboside kinase 1	0.6605		GO:0004842;GO:0046872;GO:0016310;GO:0016301;GO:0016567
CGI_10005156	0.262558	0.0115401	248.887	0.358532	0.00101452	251.092	0.331934	0.000122955	248.884	0.317675	multidrug resistance-associated 5 isoform X2 [Cercocebus atys]	0.6935		GO:0005887;GO:0005524;GO:0098656;GO:0030213;GO:0008514;GO:0043225
CGI_10024627	0.440113	1.49543e-06	273.022	0.199802	0.0452198	305.59	0.311924	0.000423788	289.848	0.31728	proline and serine-rich 2-like	0.95		unknown
CGI_10016955	0.339414	5.72081e-11	6299.61	0.207687	0.031551	6821.53	0.394682	1.29345e-09	6323.75	0.313928	Inhibitor of nuclear factor kappa-B kinase subunit epsilon	0.7425		GO:0005524;GO:0004672;GO:0006468;GO:0008063;GO:0050776
CGI_10020212	0.210444	0.0128569	1254.11	0.327273	4.60585e-05	1255.72	0.403243	9.01607e-07	1205.36	0.313653	exocyst complex component 6B	0.7995		GO:0006904;GO:0000145
CGI_10004989	0.342858	2.02348e-07	3270.31	0.33763	6.47129e-07	3403.57	0.258087	5.95249e-05	3428.26	0.312858	disintegrin and metallo ase domain-containing 10-like	0.6095		GO:0008270;GO:0007229;GO:0007219;GO:0006509;GO:0016021;GO:0004222
CGI_10028237	0.426459	5.64002e-15	592.681	0.374809	1.43513e-10	625.74	0.135894	0.0299037	662.767	0.312388	beta-1,4-N-acetylgalactosaminyltransferase bre-4 [Cerapachys biroi]	0.7295		GO:0005975;GO:0016757;GO:0016021
CGI_10005461	0.515038	6.90722e-11	1112.52	0.202664	0.023179	1271.85	0.213512	0.0148266	1244.73	0.310405	[Nematostella vectensis]	0.7785		unknown
CGI_10009231	0.314205	0.00906837	2921.09	0.307456	0.00605565	3043.18	0.304686	0.00256415	2993.06	0.308782	cathepsin L1-like	0.7815		GO:0005615;GO:0016021;GO:0004197;GO:0051603;GO:0005764
CGI_10024170	0.36083	7.82054e-06	334.843	0.346065	0.000172548	349.276	0.217546	0.00768393	357.728	0.308147	CLEC16A-like isoform X1	0.842		unknown
CGI_10008474	0.455315	1.99035e-06	392.882	0.236055	0.00124641	437.306	0.22813	0.0117322	430.306	0.3065	SMG9 isoform X2	0.6185		GO:0000184
CGI_10003271	0.266017	0.000876893	1260.57	0.453432	6.16919e-10	1237.26	0.197799	0.0265576	1315.26	0.305749	UPF0392 -like [Crassostrea gigas]	0.6045		unknown
CGI_10009356	0.452845	6.39629e-08	1065.71	0.162284	0.0358097	1212.54	0.301626	0.00030486	1138.79	0.305585	methyltransferase 24	0.667		unknown
CGI_10028181	0.326748	0.003861	659.134	0.302115	0.00131134	690.5	0.286497	0.0052263	681.5	0.30512	calcium uptake mitochondrial-like isoform X2	0.704		unknown
CGI_10025684	0.304837	9.50839e-05	844.256	0.190684	0.0199246	909.965	0.418639	3.09764e-05	832.422	0.30472	solute carrier family 35 member F6-like	0.77		GO:0015992;GO:0016021;GO:0008643;GO:0005351;GO:0000139
CGI_10010014	0.377992	6.78726e-05	1191.31	0.313132	0.000110332	1263.34	0.220911	0.00336733	1278.21	0.304012	WD repeat-containing 5	0.8035		GO:0042800;GO:0043966;GO:0006351;GO:0031175;GO:0035064;GO:0005671;GO:0043981;GO:0046972;GO:0043982;GO:0043996;GO:0044666;GO:0043995;GO:0043984;GO:0048188;GO:0001501;GO:0035948;GO:0016021;GO:0071339;GO:0051568
CGI_10015222	0.312758	9.8594e-06	1626.72	0.226774	0.000204266	1736.58	0.372203	2.13049e-07	1630.28	0.303912	26S protease regulatory subunit 8	0.964		GO:0005524;GO:0008540;GO:0000062;GO:0031597;GO:0031595;GO:0008233;GO:0017025;GO:0030433;GO:1901800;GO:0036402;GO:0045899
CGI_10009906	0.355227	9.43482e-08	522.431	0.356356	1.23472e-06	542.425	0.199831	0.00689925	559.945	0.303805	glucoside xylosyltransferase 1-like isoform X2	0.7355		GO:0016757;GO:0016020;GO:0008152
CGI_10022752	0.246343	0.00772269	459.776	0.248399	0.0129584	477.261	0.415676	9.14035e-05	444.993	0.303473	palmitoyltransferase ZDHHC17	0.676		GO:0016746
CGI_10004988	0.319257	0.000963214	2080.5	0.266166	0.00524998	2198.27	0.322201	0.000669931	2121.97	0.302541	prune homolog 2	0.838		GO:0005737;GO:0008152;GO:0016462
CGI_10028225	0.257628	0.00443167	2820.84	0.337895	1.17386e-05	2859.07	0.311083	0.000115714	2832.13	0.302202	Phosphoinositide 3-kinase adapter 1	0.6		GO:0048584;GO:0050794;GO:0045088;GO:0016310;GO:0016301
CGI_10011196	0.222544	0.0233305	325.58	0.270194	0.00857332	333.039	0.413091	2.33184e-05	313.182	0.301943	Methylmalonic aciduria type A mitochondrial	0.8445		GO:0005525;GO:0003924;GO:0008152;GO:0016021
CGI_10003224	0.392845	1.27858e-13	2457.57	0.347148	1.02766e-09	2588.99	0.165835	0.0112662	2694.18	0.301943	leucine-rich repeat-containing 74A-like isoform X1	0.638		unknown
CGI_10003105	0.234129	0.00168678	462.928	0.400043	4.94849e-08	456.817	0.267213	0.00104439	467.774	0.300461	Tripartite motif-containing 3	0.6705		GO:0008270;GO:0005622;GO:0016567
CGI_10024623	0.300571	0.00164134	386.668	0.205615	0.0360304	413.814	0.394068	1.8655e-05	383.637	0.300085	U6 snRNA-associated Sm LSm5	0.9565		GO:0003723;GO:0046540;GO:0000956;GO:1990726;GO:0005688;GO:0000398
CGI_10006113	0.351232	0.000306239	275.154	0.343351	0.000244012	286.361	0.204907	0.0366285	294.17	0.29983	UBX domain-containing 1	0.721		GO:0046872
CGI_10000697	0.280704	0.00339221	393.157	0.395507	2.75549e-05	394.338	0.221787	0.0260143	409.066	0.299333	Dedicator of cytokinesis 3	0.715		GO:0007264;GO:0005085;GO:0005622;GO:0043547
CGI_10017440	0.292846	7.75229e-05	492.122	0.4329	2.69856e-09	490.094	0.170172	0.0376933	522.404	0.29864	glutaredoxin domain-containing cysteine-rich CG31559-like [Octopus bimaculoides]	0.7415		GO:0005623;GO:0090305;GO:0016070;GO:0015035;GO:0009055;GO:0045454;GO:0055114
CGI_10004181	0.294871	7.78091e-06	975.175	0.3509	1.26989e-07	995.384	0.247258	0.00242106	1009.84	0.297676	probable pyruvate dehydrogenase E1 component subunit mitochondrial	0.823		GO:0006086;GO:0043231;GO:0004739;GO:0055114
CGI_10023758	0.311704	0.00074741	2831.41	0.291927	0.00143607	2960.26	0.287029	0.00387317	2912.41	0.296887	probable phospholipid-transporting ATPase IA isoform X6	0.941		GO:0000287;GO:0005524;GO:0045332;GO:0008152;GO:0016021;GO:0004012
CGI_10008780	0.254498	5.7605e-07	1643.83	0.489927	6.41253e-15	1590.7	0.142813	0.0224432	1740.47	0.295746	band 5 isoform X5	0.8815		GO:0016887;GO:0005524;GO:0005856;GO:0005737;GO:0008152;GO:0016021;GO:0019898;GO:0008092
CGI_10023760	0.259855	0.0339241	246.883	0.379364	4.03854e-05	246.879	0.247651	0.01487	253.099	0.295623	G2 mitotic-specific cyclin-A-like	0.692		GO:0005634;GO:0007049
CGI_10023796	0.413381	1.31947e-08	559.535	0.178425	0.0453042	625.662	0.293117	0.00146142	592.675	0.294974	TBC1 domain family member 31-like	0.7665		GO:0005813
CGI_10022026	0.22581	0.00636498	333.644	0.320835	8.46152e-05	336.711	0.337902	2.06292e-05	328.825	0.294849	Homeobox prospero	0.923		GO:0003677
CGI_10025526	0.371434	2.24473e-06	1156.61	0.240825	0.00605565	1251.57	0.271421	0.00024405	1217.96	0.29456	heparanase-like isoform X3 [Aplysia californica]	0.615		GO:0005975;GO:0043231;GO:0016020;GO:0051239;GO:0048518;GO:0016798
CGI_10002584	0.293788	0.00663232	2172.19	0.271618	0.0228086	2272.39	0.316623	0.00529839	2201.27	0.29401	unconventional myosin-X-like	0.8095		GO:0016459;GO:0005524;GO:0008152;GO:0003774
CGI_10027844	0.314584	2.61771e-07	1269.43	0.289359	7.03458e-07	1329.4	0.27468	1.65168e-05	1312.29	0.292875	phosphoinositide 3-kinase regulatory subunit 4	0.712		GO:0005524;GO:0009056;GO:0043231;GO:0006914;GO:0035032;GO:0012505;GO:0004672;GO:0007034;GO:0044763;GO:0006468;GO:0044446
CGI_10021366	0.228396	0.000247197	1254.61	0.282089	4.62465e-07	1281.73	0.366421	3.38394e-09	1226.87	0.292302	Ubiquitin-conjugating enzyme E2-17 kDa	0.883		GO:0005524;GO:0043161;GO:0070979;GO:0070062;GO:0061631;GO:0070936;GO:0006513;GO:1903955;GO:0051865
CGI_10026525	0.404037	7.75505e-08	462.336	0.166195	0.0243958	517.819	0.305517	0.000185704	486.313	0.291917	4-hydroxybenzoate mitochondrial-like isoform X1 [Aplysia californica]	0.766		GO:0004659;GO:0016021;GO:0006744
CGI_10028915	0.217778	0.000276909	1004.4	0.349985	9.30942e-07	1001.23	0.303692	6.39056e-05	997.957	0.290485	huntingtin isoform X2	0.6385		GO:0005634;GO:0005515;GO:0050794;GO:0044444;GO:0044699;GO:0043065;GO:0042981
CGI_10007211	0.292308	0.0284851	1171.43	0.268441	0.036219	1226.53	0.310538	0.0157381	1188.95	0.290429	MOB kinase activator 1B	0.969		GO:0016310;GO:0016301
CGI_10025417	0.276554	0.00159142	833.072	0.281131	3.23634e-05	864.546	0.308118	6.54843e-06	841.939	0.288601	neurocalcin-delta [Cynoglossus semilaevis]	0.651		GO:0005509
CGI_10003352	0.211705	0.0182408	894.759	0.387876	5.65398e-06	879.845	0.260523	0.00278291	899.054	0.286701	IWS1 homolog isoform X1 [Crassostrea gigas]	0.7485		GO:0006508;GO:0006915;GO:0004197
CGI_10019206	0.359206	1.85152e-06	754.614	0.26682	5.2484e-05	806.894	0.233737	0.000535192	801.394	0.286588	CCR4-NOT transcription complex subunit 10	0.6855		GO:0044424
CGI_10025294	0.236395	0.00126774	1077.88	0.339198	1.13561e-07	1084.92	0.282302	8.60551e-07	1084.61	0.285965	kelch 24 [Crassostrea gigas]	0.5915		unknown
CGI_10026280	0.248487	0.019966	374.795	0.19809	0.032322	395.797	0.410053	1.65765e-08	363.947	0.285543	dual specificity mitogen-activated kinase kinase 4-like isoform X3	0.888		GO:0005524;GO:0004672;GO:0006468
CGI_10014036	0.337887	0.000127834	811.067	0.294683	3.94223e-06	854.218	0.223224	0.000352454	858.926	0.285265	hypothetical protein CGI_10014036	1		unknown
CGI_10007221	0.245246	0.0262356	1567.13	0.271534	0.00487242	1615.59	0.338994	9.02457e-05	1554.58	0.285258	sodium-coupled monocarboxylate transporter 2-like	0.6985		GO:0055085;GO:0016021;GO:0005215
CGI_10025529	0.196861	0.0308644	731.226	0.339844	0.000127823	725.891	0.31701	0.00153167	718.205	0.284572	acidic proline-rich PRP33-like	1		unknown
CGI_10005825	0.219228	0.00704835	689.57	0.307126	2.09647e-06	696.588	0.324478	9.13464e-07	680.73	0.283611	tripeptidyl-peptidase 2 isoform X2	0.707		GO:0006508;GO:0004252
CGI_10008284	0.201046	0.0286793	618.769	0.23132	0.0169614	636.493	0.415427	2.26448e-05	590.391	0.282598	Mitochondrial dicarboxylate carrier [Trichinella pseudospiralis]	0.816		GO:0055085;GO:0003735;GO:0016021;GO:0006412
CGI_10021231	0.270869	0.00551387	1202.23	0.237192	0.0136215	1262.62	0.334144	0.00103043	1202.87	0.280735	FAM49B-like isoform X1 [Crassostrea gigas]	0.828		unknown
CGI_10001357	0.235106	0.0131807	2186.95	0.305829	2.07808e-05	2223.07	0.299845	4.73948e-06	2188.05	0.28026	kyphoscoliosis peptidase-like isoform X1 [Crassostrea gigas]	0.6845		unknown
CGI_10011993	0.329912	0.000859032	195.562	0.197548	0.0449231	212.203	0.309968	0.00272943	201.013	0.279142	Tripartite motif-containing 2	0.848		GO:0008270;GO:0005622;GO:0016567
CGI_10008298	0.252239	0.000661701	440.892	0.307816	2.0068e-05	450.464	0.273762	0.00339047	446.956	0.277939	two pore calcium channel 1-like	0.581		GO:0005216;GO:0006811;GO:0055085;GO:0016021
CGI_10005708	0.297089	0.000960607	307.855	0.221956	0.0272769	327.782	0.312117	0.000441989	312.769	0.277054	1-phosphatidylinositol 4,5-bisphosphate phosphodiesterase beta-4 isoform X5 [Rhinopithecus roxellana]	0.777		GO:0004435;GO:0005509;GO:0016042;GO:0004871;GO:0005622;GO:0035556
CGI_10026446	0.250782	0.0108672	1616.24	0.300865	0.00185385	1652.84	0.277291	0.00301252	1636.14	0.276313	rho GTPase-activating 8-like isoform X4	0.7645		GO:0007165
CGI_10016503	0.301524	1.37814e-05	747.901	0.35554	7.00992e-05	763.898	0.170286	0.0353297	796.06	0.275783	Kinesin light chain 3	0.5715		GO:0016021
CGI_10017200	0.22484	0.00146744	1113.24	0.208965	0.002489	1162.75	0.393429	1.08841e-09	1078.51	0.275745	aryl hydrocarbon receptor nuclear translocator homolog isoform X2	0.795		GO:0005634;GO:0005667;GO:0003700;GO:0005737;GO:0006351;GO:0006355;GO:0046983
CGI_10022208	0.237188	0.0132448	1354.98	0.283735	0.000806753	1387.34	0.30569	0.000403938	1353.73	0.275538	slit homolog 1 -like	0.5905		GO:0007165;GO:0016021;GO:0008063
CGI_10007198	0.162464	0.0388271	534.19	0.377611	4.09514e-06	518.28	0.284718	0.000836547	524.307	0.274931	Jumonji-like isoform X1 [Octopus bimaculoides]	0.6495		GO:0003677
CGI_10024778	0.343384	4.86538e-05	315.116	0.19621	0.0113061	342.98	0.284886	0.000158768	327.847	0.274827	dynactin subunit 1-like isoform X2	0.798		GO:0005869;GO:0016021;GO:0010970;GO:0045502
CGI_10019175	0.311613	0.000810237	4596.19	0.205896	0.0324779	4938.98	0.302727	0.00116369	4704.79	0.273412	Rho GDP-dissociation inhibitor 1	0.781		GO:0005737;GO:0005094;GO:0050790
CGI_10000902	0.245689	0.0109844	495.795	0.247353	0.017368	514.796	0.322738	0.00240176	494.041	0.271927	nuclear nucleic acid-binding C1D [Nomascus leucogenys]	0.754		GO:0000176;GO:0003677;GO:0003723;GO:0005515;GO:0000460;GO:0006355;GO:0005730;GO:0005654
CGI_10007103	0.279506	0.0209346	283.119	0.252995	0.0342864	296.879	0.276265	0.0421216	289.129	0.269589	pleckstrin homology domain-containing family F member 2-like	0.8675		GO:0046872
CGI_10002453	0.217419	0.00409784	670.817	0.328145	2.4756e-05	673.148	0.259245	8.59791e-05	675.998	0.26827	Syntaxin-18	0.796		GO:0006888;GO:0006890;GO:0015031;GO:0016021;GO:0031201;GO:0005783
CGI_10024245	0.29998	0.00436617	6779.26	0.209097	0.0486431	7251.77	0.291709	0.00372365	6938.87	0.266929	septin-2 [Pundamilia nyererei]	0.9115		GO:0005525;GO:0051301;GO:0007049
CGI_10007105	0.305997	0.00263683	1019.73	0.233474	0.0280691	1084.08	0.254069	0.0142858	1058.09	0.264513	Serine threonine- kinase 3	0.785		GO:0005524;GO:0007165;GO:0004674;GO:0006468
CGI_10014643	0.281045	0.00695365	473.507	0.213434	0.0115249	503.051	0.299003	0.000225474	481.014	0.264494	sodium-dependent lysophosphatidylcholine symporter 1-B-like	0.675		GO:0016021
CGI_10010086	0.208655	0.029784	673.422	0.413196	0.000465685	655.898	0.163427	0.0477401	698.188	0.261759	trimethyllysine mitochondrial	0.71		GO:0031418;GO:0050353;GO:0005506;GO:0055114;GO:0045329
CGI_10028145	0.284074	6.90208e-06	637.116	0.232771	0.000235583	673.252	0.265884	3.42849e-06	654.286	0.260909	ADAM 17-like protease	0.6005		GO:0008270;GO:0006508;GO:0004222
CGI_10002009	0.262901	0.000849819	7891.24	0.386044	1.675e-14	7897.54	0.132945	0.0477461	8405.55	0.26063	ETS homologous factor-like	0.832		GO:0005634;GO:0004930;GO:0003700;GO:0007186;GO:0046872;GO:0016021;GO:0006355;GO:0043565
CGI_10006556	0.196809	0.00832061	1198.34	0.332722	1.72563e-05	1192.66	0.252291	0.00847222	1201.45	0.260607	GRB2-associated-binding 1-like isoform X2	0.703		unknown
CGI_10017308	0.159763	0.00316868	1225.08	0.293373	4.67688e-09	1219.52	0.323376	1.00401e-11	1187.26	0.258838	pre-mRNA-splicing regulator WTAP-like [Lingula anatina]	0.791		GO:0005634;GO:0000381;GO:0080009
CGI_10010632	0.275672	0.00600089	5471.49	0.25948	0.0123596	5714.01	0.240196	0.0170456	5648.84	0.25845	enabled homolog isoform X2	0.8985		unknown
CGI_10008839	0.215434	0.0428643	488.212	0.342964	0.000562307	487.489	0.215668	0.0433671	498.697	0.258022	hypothetical protein CGI_10008839	1		unknown
CGI_10019862	0.239436	0.0338131	451.749	0.218185	0.0392163	472.554	0.314145	0.00433948	450.171	0.257255	phosphatidylinositol 3,4,5-trisphosphate 3-phosphatase and dual-specificity phosphatase PTEN	0.7385		GO:0016525;GO:0031174;GO:0061515;GO:0048523;GO:0005488;GO:0002275;GO:0042577;GO:0060027;GO:0008138;GO:0046856;GO:0051896;GO:0001568;GO:0004725;GO:0035335;GO:0052866
CGI_10007146	0.360448	6.78682e-06	599.516	0.239347	0.000335687	647.293	0.170841	0.00297499	650.072	0.256879	histone acetyltransferase KAT7 isoform X1	0.8125		GO:0043967;GO:0004402;GO:0003700;GO:0008270;GO:0006355;GO:0005654
CGI_10025026	0.18303	0.0252052	493.469	0.301072	0.000972564	493.534	0.286301	0.000134169	487.041	0.256801	nucleoporin 2	0.5605		GO:0046872
CGI_10005961	0.225571	0.0230052	291.05	0.279658	0.00591522	297.097	0.263612	0.00349809	293.642	0.256281	vesicle transport GOT1B-like	0.868		GO:0016192;GO:0016021
CGI_10008019	0.244506	0.00112772	1047.62	0.225453	0.0134021	1094.77	0.294332	0.00024702	1052.47	0.254763	signal peptidase complex subunit 2	0.8215		GO:0016021;GO:0006465;GO:0008233;GO:0005787
CGI_10024811	0.265442	0.000262723	1432.91	0.176863	0.0384373	1531.86	0.31641	3.79491e-05	1439.82	0.252905	transport Sec31A isoform X2 [Cricetulus griseus]	0.6795		unknown
CGI_10010720	0.134617	0.00336764	2353.77	0.321184	1.29219e-07	2304.2	0.297149	2.53801e-12	2281.23	0.250983	HEAT repeat-containing 5B-like isoform X1 [Biomphalaria glabrata]	0.8205		unknown
CGI_10015439	0.258564	0.000131284	550.633	0.267321	0.000294618	570.473	0.226779	0.0169493	567.845	0.250888	caspase-3-like [Lingula anatina]	0.596		GO:0006508;GO:0006915;GO:0004197;GO:0043065;GO:0042981
CGI_10021963	0.242185	0.00174601	599.531	0.179357	0.0115397	635.675	0.330266	1.13159e-06	595.678	0.250603	patched homolog 1-like	0.6685		GO:0007165;GO:0016021;GO:0008158
CGI_10018485	0.244878	0.00162698	1009.01	0.225308	0.000879188	1055.14	0.281219	1.8353e-05	1018.56	0.250468	Diacylglycerol O-acyltransferase 1	0.7595		GO:2000491;GO:0019915;GO:0030073;GO:0055089;GO:1903998;GO:0004144;GO:1902224;GO:0005886;GO:0046339;GO:0005789;GO:1901738;GO:0005504;GO:1904729;GO:0046321;GO:0003846;GO:0010867;GO:0016021;GO:0019432;GO:0019992;GO:0034379;GO:0035336
CGI_10020458	0.208842	0.012299	621.893	0.287725	0.000146843	630.301	0.252429	0.00086143	626.307	0.249665	GRB2-associated and regulator of MAPK -like [Crassostrea gigas]	0.536		unknown
CGI_10017713	0.178898	0.00702577	1694.66	0.313821	1.29865e-06	1686.59	0.255915	0.000502338	1687.2	0.249545	mitogen-activated kinase kinase kinase 2-like isoform X1 [Athalia rosae]	0.626		GO:0005524;GO:0004672;GO:0006468
CGI_10023375	0.270492	0.000371462	781.707	0.263501	4.7207e-07	814.469	0.210514	0.00127271	813.845	0.248169	emerin homolog 1-like [Crassostrea gigas]	1		GO:0016021
CGI_10024173	0.238214	0.0385903	219.679	0.246237	0.0224643	227.795	0.256336	0.0175413	223.179	0.246929	WD repeat-containing 91	0.587		GO:0016021
CGI_10013423	0.174965	0.00158817	895.844	0.236498	0.000467459	912.312	0.329017	3.01197e-09	870.59	0.246827	SWI SNF-related matrix-associated actin-dependent regulator of chromatin subfamily D member 1-like isoform X4	0.922		unknown
CGI_10024368	0.227845	8.64885e-05	1754.21	0.322158	2.1834e-07	1769.4	0.185848	0.011544	1815.14	0.245284	disheveled-associated activator of morphogenesis 1-like isoform X1 [Crassostrea gigas]	0.746		GO:0003779;GO:0017048;GO:0030036
CGI_10011681	0.185232	0.0206016	569.801	0.218902	0.0342304	585.465	0.330743	0.000296794	555.417	0.244959	Sodium myo-inositol cotransporter 2	0.7815		GO:0055085;GO:0016021;GO:0005215
CGI_10020266	0.305767	0.00130827	338.26	0.227151	0.00924427	360.325	0.200667	0.0413126	357.115	0.244528	amino acid transporter ANTL1-like isoform X2	0.7435		GO:0016021
CGI_10027178	0.238587	0.00653734	222.169	0.233949	0.00835965	230.966	0.260916	0.00282388	225.156	0.244484	Ubiquitin-associated domain-containing 2	0.5995		GO:0016021
CGI_10017199	0.18263	0.00641943	685.468	0.192653	0.0166468	709.897	0.358121	2.76091e-07	662.262	0.244468	Conserved oligomeric Golgi complex subunit 1	0.662		GO:0006810
CGI_10011322	0.180851	3.58224e-08	3352.51	0.319515	4.68498e-14	3333.75	0.231304	4.96339e-06	3366.82	0.24389	mitogen-activated kinase kinase kinase 14-like [Stegastes partitus]	0.5025		GO:0005524;GO:0004672;GO:0006468
CGI_10008854	0.208931	0.0108799	784.334	0.274388	0.00239487	798.403	0.24824	0.00117801	790.914	0.243853	proteasome inhibitor PI31 subunit	0.6155		GO:0000502
CGI_10006128	0.276302	3.70779e-07	829.734	0.228721	0.00512443	875.126	0.22586	0.00244131	860.672	0.243628	vacuolar sorting-associated 16 homolog	0.7645		GO:0032889;GO:0005768;GO:0035542;GO:0003779;GO:0007033;GO:0016197;GO:0006886;GO:0005765;GO:0030897
CGI_10015056	0.191205	0.0271505	1903.18	0.208611	0.0281844	1966.1	0.326728	0.000166788	1860.93	0.242181	inositol 1,4,5-trisphosphate receptor type 1-like isoform X2	0.751		GO:0044428;GO:0048016;GO:0016021;GO:0005220;GO:0070588;GO:0005783;GO:0031090
CGI_10006905	0.281615	0.00658828	311.388	0.221033	0.0322332	329.941	0.223418	0.027005	323.774	0.242022	Mesoderm development candidate 1	0.635		unknown
CGI_10005472	0.214338	0.0130639	475.192	0.264624	0.00146463	485.83	0.243433	0.00396286	480.754	0.240798	zinc finger SWIM domain-containing 6-like	0.7145		GO:0008270
CGI_10008564	0.229843	0.00653818	316.328	0.246038	0.00735432	327.061	0.243139	0.00262905	321.503	0.239673	muscleblind 2 isoform X1 [Crassostrea gigas]	0.9345		GO:0046872
CGI_10020933	0.127465	0.0170118	3773.64	0.358711	6.25989e-14	3642.93	0.232082	2.69151e-06	3723.47	0.239419	basic proline-rich -like isoform X1 [Crassostrea gigas]	0.8365		unknown
CGI_10009977	0.182271	0.0336793	3961.01	0.2666	0.00113725	4005.53	0.265686	0.00106484	3936.28	0.238186	CAP-Gly domain-containing linker 4-like isoform X2 [Tetranychus urticae]	0.795		GO:0005509
CGI_10005877	0.179703	0.000873602	847.187	0.285552	4.99532e-06	850.515	0.247149	3.95304e-06	845.94	0.237468	zinc finger ZZ-type and EF-hand domain-containing 1-like	0.5865		unknown
CGI_10009762	0.2562	0.00163348	1296.96	0.232268	0.00385101	1358.11	0.222871	0.0138588	1338.05	0.237113	baculoviral IAP repeat-containing 7-like [Octopus bimaculoides]	0.657		GO:0008270;GO:0043066;GO:0042981
CGI_10009484	0.288018	4.13391e-06	718.656	0.198464	0.0133804	768.226	0.223157	0.000556776	749.461	0.236546	pre-rRNA-processing TSR1 homolog	0.7275		GO:0042255;GO:0005730
CGI_10007711	0.20591	0.0229374	1436.35	0.223382	0.00866293	1484.02	0.27699	0.00264937	1433.01	0.235427	serine threonine- kinase tricorner isoform X2 [Halyomorpha halys]	0.902		GO:0005524;GO:0018105;GO:0005622;GO:0035556;GO:0004697
CGI_10020224	0.187648	0.0242335	580.848	0.190957	0.0117444	603.01	0.317351	4.6119e-05	569.058	0.231986	XK-related 6-like	0.646		GO:0016021
CGI_10020861	0.212702	0.0100274	406.309	0.210588	0.00692723	422.603	0.271099	0.000654671	407.247	0.231463	anaphase-promoting complex subunit 1-like	0.8025		GO:0005680
CGI_10026818	0.211087	0.000424335	2984.68	0.250238	8.90474e-06	3062.8	0.229039	6.68681e-05	3029.25	0.230121	transmembrane 8B-like	0.6055		GO:0016021
CGI_10009458	0.282538	3.6842e-07	1392.04	0.26072	1.98832e-05	1456.65	0.146425	0.032981	1484.76	0.229894	beta-(1,2)-xylosyltransferase-like [Octopus bimaculoides]	0.651		GO:0016757;GO:0008152;GO:0016021
CGI_10020043	0.215648	0.000448603	779.297	0.261866	0.000108376	798.052	0.208524	0.00159405	797.357	0.228679	A disintegrin and metallo ase with thrombospondin motifs 16	0.5905		GO:0008270;GO:0007229;GO:0006508;GO:0016021;GO:0004222;GO:0005578
CGI_10012900	0.222152	0.00157225	979.292	0.211468	0.000264623	1021.06	0.249408	6.78154e-05	991.078	0.227676	homolog isoform X2 [Parasteatoda tepidariorum]	0.7965		GO:0016021;GO:0010038
CGI_10013607	0.216387	8.41534e-06	1198.92	0.265779	3.52192e-06	1225.97	0.198493	0.010063	1230.2	0.226886	calcineurin subunit B type 1 isoform X1	0.9675		GO:0043130;GO:0005509
CGI_10004717	0.199146	0.0219867	812.157	0.322371	1.10621e-06	811.826	0.152776	0.0332095	841.821	0.224764	hypothetical protein CGI_10004717	0.7867		GO:0008270
CGI_10026128	0.24131	0.0016848	903.512	0.216799	0.00845069	945.9	0.216154	0.0123427	929.437	0.224754	hypothetical protein CGI_10026128	0.7083		GO:0016021
CGI_10023427	0.227001	0.00379031	990.435	0.18009	0.0357104	1044.73	0.26315	0.000626334	999.452	0.223414	caspase-3-like [Lingula anatina]	0.74		GO:0006508;GO:0006915;GO:0004197;GO:0043065;GO:0042981
CGI_10024626	0.231113	0.000458257	439.312	0.212836	0.00262827	458.953	0.221484	0.000683929	449.746	0.221811	gametogenetin-binding 2 isoform X2	0.776		GO:0044424
CGI_10008593	0.257088	0.000175782	524.675	0.243795	0.00056514	547.388	0.159747	0.0334429	552.434	0.22021	AGAP000913-PA [Anopheles gambiae PEST]	0.7315		GO:0016021
CGI_10016141	0.157069	0.00416516	2394.94	0.142306	0.0411673	2500.73	0.359908	3.36402e-16	2292.99	0.219761	kintoun-like isoform X2	0.6565		unknown
CGI_10004418	0.199441	0.0185282	3443.53	0.209187	0.00805749	3566.84	0.250573	0.00429063	3457.48	0.219734	Rho-associated kinase 2	0.7065		GO:0005524;GO:0046872;GO:0004674;GO:0017048;GO:0006468;GO:0005622;GO:0035556
CGI_10008830	0.235811	1.44909e-05	925.221	0.204757	0.00108109	971.145	0.217096	3.79491e-05	950.446	0.219221	uncharacterized LOC105337435	0		unknown
CGI_10017528	0.168574	0.0136735	1846.68	0.277435	1.59731e-06	1853.08	0.210522	0.001086	1859.69	0.218844	peptidyl-prolyl cis-trans isomerase FKBP4	0.729		GO:0003006;GO:0005515;GO:0097159;GO:1901363;GO:0007275;GO:0006457;GO:0044424;GO:0043227
CGI_10007504	0.212114	0.0329407	206.864	0.226399	0.012804	214.199	0.217999	0.0296399	211.173	0.218837	WD repeat-containing 11-like	0.695		unknown
CGI_10017711	0.197138	0.0022643	1008.4	0.23606	0.000198147	1034.76	0.2223	0.00095052	1020.99	0.218499	ranBP-type and C3HC4-type zinc finger-containing 1-like	0.8105		GO:0008270;GO:0000209;GO:0043065;GO:0043123;GO:0048701;GO:0048523;GO:0051090
CGI_10004932	0.253539	0.00102922	1425.19	0.216675	0.0083994	1498.49	0.184876	0.0127885	1487.52	0.218364	probable ubiquitin carboxyl-terminal hydrolase FAF-X isoform X1 [Octopus bimaculoides]	0.814		GO:0016579;GO:0005737;GO:0016477;GO:0036459;GO:0006511
CGI_10007697	0.298571	5.42057e-05	1405.49	0.217978	0.00148933	1498.45	0.136859	0.0495319	1511.91	0.217803	hypothetical protein CGI_10007697	0.995		GO:0016021
CGI_10017658	0.118304	0.0365803	1449.53	0.305514	6.68773e-09	1418.34	0.227294	4.26916e-05	1427.85	0.217037	Ankyrin repeat and kinase domain-containing partial	0.6115		GO:0005524;GO:0004674;GO:0006468
CGI_10022143	0.180928	0.00690021	532.369	0.308615	7.06311e-08	531.531	0.147021	0.0334022	550.306	0.212188	Alpha-L-iduronidase	0.6675		GO:0005975;GO:0004553
CGI_10025416	0.242607	0.000236955	498.478	0.210535	0.000998339	523.387	0.172863	0.0230125	520.569	0.208668	PREDICTED: uncharacterized protein LOC105335090 isoform X2 [Crassostrea gigas]	0.653		GO:0005737;GO:0006259;GO:0008080;GO:0003950
CGI_10010636	0.206528	0.000550072	625.593	0.151276	0.0403844	661.773	0.254418	0.00109069	628.669	0.204074	Crooked neck 1	0.8985		GO:0006396
CGI_10028030	0.152051	0.0330536	2694.18	0.197119	0.00740065	2758.43	0.260699	0.000109375	2655.48	0.20329	rho GTPase-activating 190-like isoform X1 [Lingula anatina]	0.8245		GO:0005525;GO:0007264;GO:0005622
CGI_10011562	0.230006	0.00115039	1790.2	0.192207	0.00213395	1883.65	0.179425	0.0154729	1858.21	0.200546	nuclear pore complex Nup214-like isoform X1 [Lingula anatina]	0.615		unknown
CGI_10015760	0.187646	0.00126849	1388.66	0.214866	0.000116473	1430.51	0.197632	0.00041558	1413.19	0.200048	cytoskeleton-associated 5 isoform X1 [Heterocephalus glaber]	0.667		GO:0015630;GO:0044430;GO:0000226;GO:0007049
CGI_10001522	0.188988	0.0155904	899.095	0.229518	0.0019998	922.078	0.176245	0.0116161	921.392	0.19825	tetraspanin-33-like [Lingula anatina]	0.67		GO:0016021
CGI_10007407	0.182511	0.0235892	705.821	0.20597	0.0127635	727.92	0.199088	0.0158179	716.564	0.195856	Low-density lipo receptor-related partial	0.5985		GO:0016021
CGI_10018076	0.187325	0.00697225	2254.25	0.142371	0.0312665	2377.13	0.25375	8.50118e-05	2252.62	0.194482	serine arginine repetitive matrix 1-like	0.6783		unknown
CGI_10013457	0.203135	0.00718559	553.888	0.178685	0.0343028	580.188	0.190283	0.0317555	567.825	0.190701	Ankyrin repeat and BTB POZ domain-containing 1	0.7555		GO:0044424
CGI_10025836	0.183754	0.0189294	1938.25	0.145866	0.0389776	2039.24	0.238509	0.000409583	1944.06	0.189376	casein kinase I isoform gamma-3-like isoform X5	0.8385		GO:0005524;GO:0004674;GO:0006468
CGI_10027383	0.233497	5.13337e-07	2125.14	0.121968	0.025569	2289.46	0.19283	0.00010195	2197.73	0.182765	SWI SNF complex subunit SMARCC2 isoform X5	0.842		GO:0016514;GO:0000978;GO:0031492;GO:0007399;GO:0006337;GO:0005654;GO:0006357;GO:0000980;GO:0000790;GO:0003713;GO:0045892;GO:0071564;GO:0045893;GO:0017053;GO:0043044;GO:0071565
CGI_10015065	0.209765	0.00104898	4834.49	0.205039	2.61369e-05	5031.94	0.127503	0.00638593	5071.27	0.180769	proto-oncogene tyrosine- kinase Yrk-like isoform X2	0.744		GO:0005524;GO:0018108;GO:0004715;GO:0071310;GO:0043226;GO:0044424
CGI_10021671	0.205938	0.00070746	931.386	0.164156	0.0296946	981.109	0.167807	0.00669705	962.854	0.1793	hypothetical protein CGI_10021671	0.7395		GO:0016021
CGI_10019999	0.212453	0.00119552	601.301	0.168507	0.0301881	633.533	0.153824	0.0477606	625.209	0.178261	transmembrane 50B [Struthio camelus australis]	0.842		GO:0016021;GO:0005783;GO:0005886
CGI_10013447	0.263159	6.26544e-05	1404.4	0.167896	0.00113725	1504.68	0.096475	0.0370129	1513.9	0.175843	F-box WD repeat-containing 1A-like isoform X2	0.9095		GO:0061630;GO:0045309;GO:0061136;GO:0000209;GO:0006470;GO:0043122;GO:0046983;GO:0008013;GO:0045862;GO:0060444;GO:0042753;GO:0031648;GO:0005634;GO:0045892;GO:0005737;GO:0045893;GO:0060828;GO:0031146;GO:0033598;GO:0019005;GO:0051726;GO:0071407
CGI_10020669	0.148722	0.00262912	1871.44	0.223011	0.00189813	1898.2	0.153769	0.00271401	1907.51	0.175167	Rho guanine nucleotide exchange factor 10	0.725		GO:0035023;GO:0005089;GO:0043547
CGI_10012572	0.19889	0.00339094	847.195	0.157639	0.0403337	892.239	0.167703	0.0260143	873.797	0.174744	serine threonine- phosphatase 6 regulatory ankyrin repeat subunit A isoform X2	0.8005		unknown
CGI_10022739	0.109318	0.0499613	1496.91	0.217657	1.62182e-05	1501.25	0.194049	0.000937244	1486.03	0.173675	SH3 domain-containing kinase-binding 1-like isoform X2	0.76		GO:0016310;GO:0016301
CGI_10010940	0.132229	0.049946	1583.42	0.160365	0.0246753	1630.2	0.209571	0.000164651	1576.45	0.167388	oxidation resistance 1-like isoform X4	0.7735		unknown
CGI_10012684	0.171475	0.000356653	11553.7	0.139343	0.00961666	12132.5	0.187815	0.000712934	11731.7	0.166211	Ras-like GTP-binding Rho1	0.958		GO:0005525;GO:0006913;GO:0007264;GO:0003924;GO:0008152;GO:0006886;GO:0005622;GO:0005886
CGI_10019731	0.157345	0.0284522	452.996	0.177881	0.010872	467.435	0.152169	0.0278521	463.065	0.162465	forkhead box J3	0.6635		GO:0003700;GO:0006355;GO:0043565
CGI_10020713	0.174503	0.00802981	656.284	0.136023	0.0312315	690.217	0.168454	0.00287918	671.236	0.15966	Cleavage and polyadenylation specificity factor subunit 1	0.7805		GO:0003676;GO:0005634
CGI_10023988	0.159232	0.00343881	1687.11	0.163316	0.00194617	1750.99	0.149336	0.0244336	1728.56	0.157295	ectonucleoside triphosphate diphosphohydrolase 2-like isoform X4 [Crassostrea gigas]	0.631		GO:0008152;GO:0016021;GO:0016787
CGI_10008867	0.162786	0.00536079	1743.48	0.182765	0.0100768	1799.58	0.12353	0.0416851	1803.2	0.156361	large proline-rich BAG6-like isoform X1	0.58		unknown
CGI_10026535	0.120689	0.0256416	2732.83	0.163491	0.0367239	2799.51	0.151664	0.00885587	2761.24	0.145282	staphylococcal nuclease domain-containing 1-like	0.8		GO:0005525;GO:0003712;GO:0035194;GO:0005737;GO:0007264;GO:0016020;GO:0015031;GO:0016442;GO:1903506
CGI_10022304	0.176591	0.000830416	1303.46	0.12144	0.0185197	1379.53	0.127441	0.00469247	1352.4	0.141824	AN1-type zinc finger 3-like	0.94		unknown
CGI_10009680	0.11316	0.0214519	1693.35	0.100947	0.0203686	1766.51	0.0856292	0.0481691	1744.33	0.0999122	casein kinase II subunit alpha-like [Crassostrea gigas]	0.915		GO:0005524;GO:0004672;GO:0006468
CGI_10007757	-0.176778	0.00036362	21723.5	-0.113538	0.0351693	22058.9	-0.129067	0.0308648	21794.3	-0.139794	60S ribosomal L15	0.892		GO:0003735;GO:0002181;GO:0022625
CGI_10026072	-0.16488	0.00139471	3696.33	-0.136247	0.00579875	3801.06	-0.140367	0.0148571	3739.77	-0.147165	serine threonine- phosphatase 2B catalytic subunit alpha isoform-like isoform X1	0.874		GO:0004721;GO:0006470
CGI_10017863	-0.147294	0.0360818	690.054	-0.164281	0.0117198	721.351	-0.186123	0.011448	714.525	-0.165899	nuclear pore complex Nup133	0.615		GO:0005635;GO:0006913;GO:0007275;GO:0033036;GO:0043234;GO:0009987;GO:0071702
CGI_10007304	-0.200391	2.07858e-05	1103.18	-0.178694	0.00566027	1137.84	-0.120014	0.0251621	1093.68	-0.166366	leucine zipper tumor suppressor 2 homolog [Lingula anatina]	0.725		unknown
CGI_10002568	-0.189708	0.00133487	3000.16	-0.183534	0.0097093	3110.86	-0.145213	0.0194264	3013.11	-0.172819	serine-arginine 55-like isoform X1	0.779		GO:0000166;GO:0003676
CGI_10012833	-0.167544	0.00383953	1135.86	-0.20871	0.000230357	1198.26	-0.142204	0.0479581	1148.84	-0.172819	translation machinery-associated 7	0.941		unknown
CGI_10003051	-0.153476	0.00150315	2117.28	-0.13636	0.0168152	2186.83	-0.237221	9.07061e-07	2229.95	-0.175686	probable splicing arginine serine-rich 6	0.81		GO:0000166;GO:0003676;GO:0008270
CGI_10010944	-0.17782	0.0112661	2713.25	-0.170042	0.03801	2812.08	-0.181523	0.00299785	2773.89	-0.176462	PREDICTED: uncharacterized protein LOC105331110 [Crassostrea gigas]	0.595		GO:0016021
CGI_10007728	-0.195903	0.000626898	1040.52	-0.224648	1.62366e-06	1093.04	-0.112024	0.036486	1030.07	-0.177525	Glucose-fructose oxidoreductase domain-containing 1	0.7655		GO:0016491;GO:0055114
CGI_10027165	-0.218069	0.00010139	965.785	-0.184106	0.0059258	990.931	-0.145249	0.0482211	959.765	-0.182475	netrin-1-like isoform X1	0.705		GO:0016525;GO:0061626;GO:0005576;GO:0003146;GO:0021960;GO:0048846;GO:0035908;GO:0030516;GO:0030878;GO:0048665;GO:0001569;GO:0001947;GO:0071678;GO:0033564;GO:0016358
CGI_10019160	-0.192684	0.00142859	874.606	-0.186543	0.00848582	906.641	-0.171781	0.00530368	886.004	-0.183669	TATA element modulatory factor-like isoform X1 [Biomphalaria glabrata]	0.7155		GO:0050794;GO:0007286
CGI_10007576	-0.144659	0.029342	943.884	-0.180819	0.0121064	994.413	-0.239706	9.32409e-07	998.306	-0.188395	synaptotagmin 5	0.7875		GO:0070382;GO:0098793;GO:0048791;GO:0019905;GO:0006906;GO:0005509;GO:0030276;GO:0006886;GO:0017158;GO:0017137;GO:0005886;GO:0005544
CGI_10018082	-0.164492	0.0304088	990.561	-0.214705	0.000255841	1048.78	-0.187227	0.00165231	1019.81	-0.188808	golgin subfamily A member 6 22 isoform X2 [Crassostrea gigas]	0.5575		unknown
CGI_10024965	-0.223638	0.000840315	1148.54	-0.198343	0.0027572	1182.13	-0.152483	0.0364274	1141.96	-0.191488	#NAME?	0.6975		GO:0003810;GO:0018149
CGI_10006659	-0.228417	0.00267029	2275.94	-0.200062	0.00192973	2340.27	-0.151906	0.000558718	2258.21	-0.193462	Coiled-coil domain-containing 9	0.7755		GO:0004930;GO:0007186;GO:0016021
CGI_10028780	-0.216711	0.00291896	554.146	-0.186837	0.00592075	569.773	-0.177406	0.0159592	558.047	-0.193651	tubulin-specific chaperone D	0.74		GO:0007021;GO:0048487;GO:0005096;GO:0007023;GO:0043547
CGI_10025645	-0.200375	0.0183746	394.64	-0.213123	0.00467329	411.735	-0.174053	0.0227809	398.704	-0.19585	negative elongation factor C D	0.853		GO:0005634;GO:0003746;GO:0045892;GO:0006414
CGI_10010762	-0.146339	0.0348681	871.829	-0.268815	1.89215e-05	948.12	-0.173145	0.0423715	898.637	-0.1961	UPF0587 C1orf123 homolog	0.7855		unknown
CGI_10024855	-0.192736	0.0111366	1241.09	-0.177063	0.0296059	1282.28	-0.226798	0.003942	1283.56	-0.198866	protocadherin Fat 4-like	0.6115		GO:0016021
CGI_10015203	-0.20333	1.48437e-05	3125.11	-0.166371	0.000136203	3203.17	-0.232072	4.65021e-09	3225.03	-0.200591	somatomedin-B and thrombospondin type-1 domain-containing -like	0.561		GO:0006955;GO:0005044;GO:0006898;GO:0030247
CGI_10002331	-0.149459	0.0489853	490.991	-0.235736	0.00169508	527.199	-0.218149	0.00116481	514.178	-0.201115	paramyosin-like isoform X1 [Crassostrea gigas]	0.55		unknown
CGI_10024985	-0.224672	0.0102948	676.153	-0.224517	0.00133102	702.424	-0.162259	0.0478289	674.509	-0.203816	large subunit GTPase 1 homolog	0.713		GO:0005525;GO:0051168;GO:0003924;GO:0015030;GO:0005829;GO:0042254;GO:0005783
CGI_10019796	-0.151837	0.0190129	2679.54	-0.224073	0.000972564	2860.23	-0.246131	1.19304e-07	2832.87	-0.207347	Ski oncogene	0.5475		GO:0046332;GO:0048523;GO:0044424;GO:0009987
CGI_10004265	-0.254116	1.8012e-06	1287.52	-0.147082	0.0205753	1286	-0.221098	0.000124593	1298.87	-0.207432	hypothetical protein CGI_10004265	1		unknown
CGI_10023435	-0.19858	0.00125176	2629.12	-0.132522	0.0171482	2666.86	-0.29159	7.32389e-09	2780.33	-0.207564	tetraspanin-18-like isoform X3	0.7525		GO:0016021
CGI_10005390	-0.21054	0.0237576	212.574	-0.202262	0.0267261	220.198	-0.210937	0.029602	216.755	-0.207913	transcription elongation factor A N-terminal and central domain-containing 2	0.709		GO:0005634;GO:0003677;GO:0005515;GO:0006351;GO:0005272;GO:0016021;GO:0035725
CGI_10015187	-0.243074	0.00012408	2608.95	-0.240885	7.61208e-08	2708.86	-0.149417	0.0124778	2572.23	-0.211125	lactadherin-like isoform X5 [Lingula anatina]	0.7585		unknown
CGI_10024780	-0.220095	0.00200067	980.4	-0.271506	7.93886e-06	1038.7	-0.147121	0.0414541	973.921	-0.212907	probable serine threonine- kinase kinX [Crassostrea gigas]	0.5455		GO:0016021
CGI_10006390	-0.182518	0.0163092	333.258	-0.246496	0.000567791	354.596	-0.210977	0.005301	343.676	-0.213331	neurotrimin-like [Crassostrea gigas]	0.604		unknown
CGI_10022470	-0.242269	0.00030553	1165.81	-0.180511	0.0093001	1183.78	-0.222467	0.00112336	1181.27	-0.215082	protocadherin beta-15-like [Crassostrea gigas]	0.579		GO:0005509;GO:0016021;GO:0007156;GO:0005886
CGI_10011133	-0.230613	0.00748986	679.875	-0.215491	0.000449309	702.331	-0.208674	0.00192554	688.252	-0.218259	bone morphogenetic 2-like [Crassostrea gigas]	0.696		GO:0043009;GO:0008083;GO:0009892;GO:0008285;GO:0030097;GO:0007399;GO:0048754;GO:0005576;GO:0072073;GO:0060688;GO:0060425;GO:0001568;GO:0001823;GO:0030509;GO:0051240;GO:0048646;GO:0045597;GO:0090185;GO:0009967;GO:0003002;GO:0048705;GO:0040007;GO:0010604;GO:0001932;GO:0048598;GO:0016021;GO:0010941;GO:0030154;GO:0031325;GO:2000027
CGI_10006129	-0.231734	0.000487339	1122.99	-0.257991	2.9902e-06	1178.38	-0.166116	0.00167192	1118.64	-0.218613	tetraspanin-13 isoform X2	0.736		GO:0016021
CGI_10026495	-0.236233	0.0105601	1571.3	-0.167206	0.0190322	1590.92	-0.266282	0.00105867	1622.19	-0.22324	Splicing arginine serine-rich 18	0.663		GO:0016021
CGI_10024994	-0.175316	0.0193582	1183.7	-0.325503	4.78167e-06	1302	-0.170289	0.0396605	1205.97	-0.223703	prolyl 4-hydroxylase subunit alpha-1-like	0.745		GO:0004656;GO:0031418;GO:0016702;GO:0005506;GO:0005783;GO:0019511;GO:0055114
CGI_10019674	-0.260807	0.000539834	4617.13	-0.136784	0.00930676	4580.98	-0.27411	2.82703e-06	4737.55	-0.2239	membrane metallo-endopeptidase-like 1 [Bactrocera cucurbitae]	0.687		GO:0006508;GO:0016021;GO:0004222
CGI_10011978	-0.193002	0.0427843	289.404	-0.230418	0.0142731	304.805	-0.253788	0.0163271	302.298	-0.225736	integrator complex subunit 10 isoform X2	0.6285		GO:0016180;GO:0032039
CGI_10008172	-0.361628	1.24563e-11	5452.79	-0.161231	0.0131695	5252.76	-0.155531	0.00905779	5149.67	-0.22613	sushi domain-containing 2-like	0.583		GO:0007160;GO:0016021
CGI_10004264	-0.233821	0.00126774	1088.08	-0.168841	0.00373048	1103.98	-0.280542	2.41175e-09	1131.01	-0.227734	serine threonine- kinase H1 homolog	0.7885		GO:0005524;GO:0007275;GO:0004674;GO:0006468
CGI_10010880	-0.203059	0.000381809	3767.75	-0.273317	0.000177912	4021.46	-0.213433	0.00117564	3861.81	-0.229936	la-related 1B-like isoform X1 [Aplysia californica]	0.697		GO:0005634;GO:0003723;GO:0030529;GO:0006396
CGI_10014056	-0.190895	0.0273727	533.956	-0.241524	0.00204388	565.624	-0.263391	0.000468972	560.14	-0.231936	atrial natriuretic peptide receptor 1-like	0.6565		GO:0004568;GO:0005975;GO:0008061;GO:0006032;GO:0016021;GO:0005576
CGI_10019259	-0.231194	0.0440435	1709.26	-0.206441	0.00407276	1758.61	-0.260795	0.000399277	1763.31	-0.23281	receptor-type tyrosine- phosphatase kappa-like isoform X2	0.7045		GO:0004725;GO:0016021;GO:0035335
CGI_10006686	-0.267048	0.000739116	493.619	-0.258458	0.0012342	511.687	-0.174504	0.0451814	487.166	-0.233337	kin of IRRE 2 [Aplysia californica]	0.644		unknown
CGI_10009088	-0.248005	0.0335237	875.259	-0.203458	0.0288745	894.133	-0.252274	0.000524264	893.981	-0.234579	ammonium transporter 1	0.6805		GO:0008519;GO:0072488;GO:0016021
CGI_10022454	-0.187833	0.0257568	970.458	-0.27319	8.20379e-06	1041.08	-0.243002	2.69233e-05	1011.2	-0.234675	hypothetical protein CGI_10022454	0.6767		GO:0016021
CGI_10022644	-0.211048	0.0136868	494.192	-0.319847	0.000214839	535.278	-0.1762	0.0300188	497.784	-0.235699	PREDICTED: uncharacterized protein LOC105322632 [Crassostrea gigas]	0.5265		GO:0016021
CGI_10021022	-0.197663	0.0428892	207.997	-0.301477	0.00153462	224.785	-0.210559	0.0377241	213.301	-0.236566	GTP cyclohydrolase 1-like	0.6438		GO:0016021
CGI_10014248	-0.188126	0.00124673	1453.15	-0.273035	3.35485e-06	1559.3	-0.25969	1.66936e-06	1523.47	-0.240284	neural proliferation differentiation and control 1-like	0.783		GO:0016021
CGI_10028843	-0.232575	0.0323344	5897.62	-0.210508	0.0294416	6077.51	-0.280905	0.00296599	6132.8	-0.241329	serine hydrolase	0.553		unknown
CGI_10017744	-0.242475	0.0114117	936.376	-0.234785	0.0335418	970.676	-0.256584	0.0069872	961.026	-0.244615	Leucine-rich repeats and immunoglobulin-like domains 3	0.67		GO:0005509
CGI_10015704	-0.241495	0.0451064	1618.45	-0.239991	0.00847383	1680.2	-0.254458	0.000247842	1658.92	-0.245315	PREDICTED: uncharacterized protein LOC105331143 [Crassostrea gigas]	1		GO:0016021
CGI_10020032	-0.303878	1.37862e-05	1469.13	-0.213852	0.00179901	1475.53	-0.221641	0.00149827	1453.87	-0.246457	dystroglycan-like isoform X4 [Lingula anatina]	0.595		GO:0010470;GO:0010717;GO:0005515;GO:0005509;GO:0016010;GO:0016021;GO:0016476;GO:1904261;GO:0016323;GO:0007016
CGI_10014943	-0.176349	0.02604	812.831	-0.357046	1.14693e-06	904.731	-0.209394	0.00604597	839.671	-0.247596	Neuronal membrane glyco M6-b	0.875		GO:0016021
CGI_10019510	-0.213376	0.00826231	404.296	-0.284206	0.000149761	431.532	-0.246163	0.00161727	418.088	-0.247915	Serine threonine- kinase Nek4	0.649		GO:0005524;GO:0050794;GO:0005737;GO:0030145;GO:0004674;GO:0006468;GO:0007049;GO:0050896
CGI_10004261	-0.208072	0.0219029	481.666	-0.369815	2.5771e-07	533.007	-0.170287	0.0432461	485.184	-0.249391	A disintegrin and metallo ase with thrombospondin motifs 18	0.6645		GO:0008270;GO:0007229;GO:0006508;GO:0004222;GO:0005578
CGI_10017854	-0.265446	1.42009e-05	4547.42	-0.324737	2.86518e-08	4834.69	-0.161089	0.0244913	4465.81	-0.250424	dipeptidyl peptidase 1	0.7615		GO:0005615;GO:0004197;GO:0044699;GO:0051603;GO:0005764
CGI_10015360	-0.255848	5.36842e-05	2264.54	-0.13513	0.0078904	2249.94	-0.365642	1.58635e-11	2411.46	-0.252207	SPARC-related modular calcium-binding 1-like isoform X9	0.8		GO:0007165;GO:0005509;GO:0005929;GO:0005578
CGI_10005796	-0.404299	7.88815e-09	1617.9	-0.162209	0.023021	1532.15	-0.193993	0.0080038	1523.2	-0.2535	kinesin KIF26B isoform X1 [Crassostrea gigas]	0.8205		GO:0005524;GO:0030705;GO:0008152;GO:0008104;GO:0007411;GO:0005871;GO:0008574;GO:0007018;GO:0005874;GO:0008017
CGI_10021080	-0.327161	1.34707e-05	375.876	-0.200515	0.031242	372.09	-0.236927	0.00593505	370.649	-0.254868	Mitochondrial folate transporter carrier	0.749		GO:0055085;GO:0016021
CGI_10003821	-0.224025	0.0487689	286.678	-0.26684	0.0131832	302.796	-0.27422	0.0140366	298.528	-0.255028	kin of IRRE 2 isoform X1 [Crassostrea gigas]	0.6365		unknown
CGI_10013881	-0.260238	0.000311538	2004.08	-0.190907	0.00380812	2028.94	-0.316816	2.41454e-05	2091.38	-0.255987	A disintegrin and metallo ase with thrombospondin motifs 7	0.695		GO:0008270;GO:0007229;GO:0006508;GO:0004222;GO:0005578
CGI_10022473	-0.16532	0.0405641	909.601	-0.176241	0.021296	948.972	-0.42666	2.092e-07	1027.01	-0.256074	epidermal growth factor receptor isoform X2	0.6635		GO:0005524;GO:0018108;GO:0004714;GO:0016021;GO:0007169
CGI_10008009	-0.20967	0.0123282	1288.8	-0.221154	0.0285082	1345.7	-0.340769	1.51034e-05	1383.76	-0.257198	protocadherin-9-like [Crassostrea gigas]	0.6025		GO:0005509;GO:0016021;GO:0007156;GO:0005886
CGI_10023568	-0.404077	3.61273e-08	1262.2	-0.188546	0.021805	1207.57	-0.179221	0.0445283	1182.24	-0.257282	middle subunit-like	0.5945		GO:0006879;GO:0005623;GO:0008199;GO:0006826;GO:0055114;GO:0004322
CGI_10007676	-0.283462	0.000122204	302.089	-0.335075	9.95145e-06	320.322	-0.158546	0.0376322	294.241	-0.259028	Tripartite motif-containing 2	0.7575		GO:0008270;GO:0005622;GO:0016567
CGI_10028796	-0.337026	1.11027e-05	1225.47	-0.270751	0.000934089	1241.24	-0.172496	0.0467451	1175.32	-0.260091	Blastula protease 10	0.629		unknown
CGI_10013656	-0.25509	0.0207937	259.142	-0.33118	0.000303663	277.265	-0.197632	0.0334814	258.721	-0.261301	neurogenic locus delta-like	0.5835		GO:0007154;GO:0007275;GO:0005509;GO:0016021
CGI_10017045	-0.264683	3.6547e-05	790.956	-0.256274	0.00015311	819.241	-0.263984	0.000794442	807.48	-0.261647	fibroblast growth factor 18-like isoform X3	0.985		unknown
CGI_10017792	-0.318239	6.62173e-08	1526.96	-0.191368	0.00788328	1512.88	-0.278519	0.00821633	1536.47	-0.262708	FYVE and coiled-coil domain-containing 1	0.672		GO:0016021;GO:0006810
CGI_10006426	-0.318494	0.000613954	390.671	-0.230137	0.0129479	392.313	-0.245505	0.00648244	387.531	-0.264712	DEP domain-containing 5 isoform X5	0.709		GO:0005622;GO:0035556
CGI_10018870	-0.328441	3.38761e-07	1088.98	-0.300864	2.2753e-05	1119.88	-0.165875	0.0217532	1045.42	-0.26506	receptor-type tyrosine- phosphatase partial	0.653		GO:0004725;GO:0016021;GO:0035335
CGI_10002924	-0.222734	0.00166539	1287.61	-0.344008	7.99025e-08	1401.63	-0.231955	0.00120212	1318.94	-0.266232	calmodulin [Thecamonas trahens ATCC 50062]	0.7185		GO:0045937;GO:0065008;GO:0015630;GO:0008076;GO:0043388;GO:0043005;GO:0043227;GO:0000086;GO:0005737;GO:0044430;GO:0005509;GO:0047485;GO:0030234;GO:0080090;GO:0019899
CGI_10026928	-0.237591	0.0159542	1772.59	-0.251154	0.0371932	1852.52	-0.324798	0.0036427	1872.4	-0.271181	Glutamyl aminopeptidase	0.6665		GO:0008270;GO:0006508;GO:0016021;GO:0004177;GO:0008237
CGI_10018933	-0.292181	0.00276669	1486.94	-0.244495	0.00805204	1517.45	-0.283957	0.000128768	1512.82	-0.273544	ELAV 1 [Octopus bimaculoides]	0.6375		GO:0000166;GO:0003723
CGI_10011484	-0.271169	0.000177793	1048.47	-0.38954	3.18001e-07	1140.99	-0.162061	0.0446437	1027.35	-0.274257	metabotropic glutamate receptor-like [Parasteatoda tepidariorum]	0.5485		GO:0004930;GO:0007186;GO:0016021
CGI_10028420	-0.466834	9.35559e-15	1558.66	-0.175514	0.0117359	1447.1	-0.182004	0.0104944	1425.17	-0.274784	Hermansky-Pudlak syndrome 5	0.565		unknown
CGI_10026875	-0.362301	1.38909e-14	1900.74	-0.261449	0.00686116	1901.62	-0.200715	0.00921429	1825.29	-0.274822	hypothetical protein CGI_10026875	0.62		unknown
CGI_10002350	-0.315839	0.000558158	851.629	-0.263915	0.0025639	867.47	-0.25073	0.0270727	848.549	-0.276828	calcium and integrin-binding 1-like	0.776		GO:0005509
CGI_10024159	-0.255875	0.0262356	2029.5	-0.183702	0.047819	2051.57	-0.394158	3.13087e-09	2184.57	-0.277912	lipopolysaccharide-induced tumor necrosis factor-alpha factor homolog [Crassostrea gigas]	0.7375		GO:0016021
CGI_10016670	-0.32464	7.71709e-05	922.509	-0.171409	0.0220418	904.837	-0.339578	1.47106e-05	947.616	-0.278542	nitrogen regulatory GLN3-like isoform X1 [Crassostrea gigas]	0.744		GO:0005634;GO:0003700;GO:0008270;GO:0006355;GO:0043565
CGI_10025726	-0.202748	0.0429706	1445.39	-0.411287	1.66029e-07	1627.78	-0.224449	0.00387863	1487.05	-0.279495	death-associated 1-like	0.67		unknown
CGI_10007634	-0.266382	0.0153324	148.442	-0.314884	0.00238934	157.065	-0.260966	0.0157302	151.1	-0.280744	Bone morphogenetic 3	0.867		GO:0008083;GO:0043408;GO:0005160;GO:0060395;GO:0007267;GO:0042981;GO:0048468;GO:0005125;GO:0040007;GO:0005615;GO:0070062;GO:0030509;GO:0001649;GO:0070700;GO:0010862;GO:0051216
CGI_10013156	-0.320603	1.86828e-05	530.802	-0.21751	0.00202453	530.125	-0.305124	5.47395e-05	538.671	-0.281079	Biogenesis of lysosome-related organelles complex 1 subunit 1	0.8875		GO:0031083;GO:0005739;GO:0016197
CGI_10014595	-0.287209	0.000243591	1340.76	-0.252193	2.55869e-05	1374.34	-0.306444	4.53989e-06	1378.47	-0.281949	low molecular weight phosphotyrosine phosphatase	0.6955		GO:0016791
CGI_10009539	-0.349807	5.07913e-05	292.394	-0.260926	0.00802444	293.442	-0.238446	0.00899958	285.969	-0.28306	Replication factor C subunit 4	0.7325		GO:0005524;GO:0003689;GO:0006261;GO:0005663
CGI_10003777	-0.231955	3.04152e-06	2083.99	-0.283644	8.54874e-09	2208.47	-0.333813	1.7593e-06	2212.53	-0.283137	sodium channel 1 brain-like isoform X2	0.813		GO:0060078;GO:0034765;GO:0001518;GO:0035725;GO:0086010;GO:0005248;GO:0019228
CGI_10015578	-0.319198	0.00184677	199.166	-0.277735	0.0200787	203.858	-0.256059	0.0187801	198.419	-0.284331	transcription factor AP-2-epsilon-like isoform X2	0.768		GO:0005634;GO:0003700;GO:0006355
CGI_10026945	-0.296638	0.00697225	178.866	-0.305986	0.0100623	186.699	-0.253406	0.0272423	179.598	-0.285343	ras-interacting RIP3-like isoform X1 [Biomphalaria glabrata]	0.8019		unknown
CGI_10026286	-0.287704	0.0134136	307.992	-0.319452	0.0136842	324.305	-0.252503	0.0241357	310.053	-0.286553	zinc finger 276	0.5595		GO:0003677;GO:0046872
CGI_10015115	-0.260743	0.0102481	1511.92	-0.210917	0.0246854	1541.73	-0.395071	2.00596e-06	1626.28	-0.28891	PREDICTED: uncharacterized protein LOC105318289 isoform X5	0.642		unknown
CGI_10013621	-0.192582	0.026775	704.758	-0.277193	0.00778968	756.703	-0.399164	2.14613e-05	779.515	-0.289646	[Nematostella vectensis]	0.6735		GO:0006750;GO:0003839
CGI_10003801	-0.326082	0.00212318	2010.2	-0.271184	6.80957e-05	2043.48	-0.275355	9.51159e-05	2010.64	-0.290874	hypothetical protein CGI_10003801	0.8325		GO:0016021
CGI_10013086	-0.253549	0.00385611	519.009	-0.31839	0.0124544	553.828	-0.302229	0.000815367	540.075	-0.291389	major egg antigen-like [Octopus bimaculoides]	0.6835		unknown
CGI_10003872	-0.300024	0.000157758	4637.71	-0.298821	0.0498088	4825.96	-0.277215	0.0179588	4696.6	-0.29202	hypothetical protein CGI_10003872	0.93		unknown
CGI_10011741	-0.316824	3.92651e-05	378.614	-0.213699	0.0301021	378.47	-0.345613	1.41289e-05	390.966	-0.292045	lisH domain-containing ARMC9 isoform X2	0.6725		unknown
CGI_10020452	-0.390509	1.04471e-06	282.894	-0.296737	0.000708103	283.232	-0.194098	0.0268849	267.498	-0.293781	GRB2-associated and regulator of MAPK -like [Crassostrea gigas]	0.521		unknown
CGI_10016299	-0.32729	0.00163596	547.898	-0.199371	0.04329	542.067	-0.357284	0.000634358	565.825	-0.294648	DDB1- and CUL4-associated factor partial	0.825		GO:0005634;GO:0005925;GO:0005737;GO:0030374;GO:0045944;GO:0080008
CGI_10028696	-0.303782	0.0182325	1403.88	-0.265336	0.0113741	1436.28	-0.315729	0.000872822	1438.57	-0.294949	mitochondrial import inner membrane translocase subunit Tim17-B	0.739		GO:0005744;GO:0031305;GO:0015266;GO:0030150;GO:0015450;GO:0016787
CGI_10007210	-0.267998	0.0240889	969.518	-0.279915	0.000371055	1011.39	-0.338294	2.28365e-05	1016.39	-0.295402	nucleolin-like isoform X1 [Crassostrea gigas]	0.7675		GO:0008152;GO:0016874
CGI_10008585	-0.429053	1.03552e-11	777.235	-0.241759	0.00254226	751.538	-0.216495	0.00380807	730.613	-0.295769	activating signal cointegrator 1 complex subunit 3-like	0.9325		GO:0003676;GO:0005524;GO:0008152;GO:0004386
CGI_10024906	-0.327435	5.0863e-05	863.745	-0.362046	7.44107e-06	909.566	-0.205364	0.029333	842.037	-0.298282	von Willebrand factor type EGF and pentraxin domain-containing 1-like	0.526		unknown
CGI_10025379	-0.322967	0.0104863	4689.02	-0.350211	0.0116194	4927.86	-0.225145	0.0412015	4607.81	-0.299441	calponin-2-like isoform X2	0.8025		GO:0005515
CGI_10012025	-0.259325	0.000429886	700.533	-0.29929	8.86375e-06	739.283	-0.340064	3.92803e-06	737.652	-0.29956	NAD(P)H:quinone oxidoreductase	0.771		GO:0016491;GO:0055114
CGI_10025831	-0.276124	0.00071298	450.758	-0.309405	1.21215e-05	474.116	-0.313766	6.18166e-05	466.887	-0.299765	serine threonine- kinase 40	0.7685		GO:0005524;GO:0004672;GO:0006468
CGI_10006133	-0.211373	0.038871	6293.83	-0.199529	0.0200948	6510.04	-0.494028	2.18986e-13	7173.44	-0.301643	latent-transforming growth factor beta-binding 1-like	0.7155		GO:0005509;GO:0005201;GO:0005578
CGI_10026894	-0.337149	0.000102032	697.406	-0.235607	0.00692723	696.939	-0.333052	0.00057918	711.035	-0.301936	Adenylate kinase isoenzyme 1	0.8375		GO:0004017;GO:0004127;GO:0005524;GO:0009041;GO:0046939;GO:0006207;GO:0005737;GO:0046034;GO:0006221
CGI_10022672	-0.385051	2.37152e-05	238.154	-0.264306	0.00266018	236.242	-0.258137	0.022402	231.661	-0.302498	transcriptional regulator [Legionella pneumophila pascullei]	0.582		GO:0008168;GO:0032259
CGI_10022088	-0.255393	0.0124814	471.881	-0.29528	0.00265407	497.485	-0.358148	5.24011e-07	500.471	-0.30294	phenylalanine-4-hydroxylase isoform X2	0.8985		GO:0006559;GO:0004505;GO:0005506;GO:0055114;GO:0016597
CGI_10022185	-0.252817	4.09443e-06	1726.68	-0.43532	5.48674e-10	1927.22	-0.224742	6.74624e-05	1743.75	-0.304293	cytochrome P450 3A11-like [Crassostrea gigas]	0.741		GO:0005506;GO:0016705;GO:0016020;GO:0055114;GO:0004497;GO:0020037
CGI_10006971	-0.280141	1.72965e-06	2269.21	-0.342068	2.4463e-07	2415.98	-0.293563	1.67223e-07	2329.05	-0.305257	Iron zinc purple acid phosphatase	0.837		GO:0004867;GO:0046872;GO:0016021;GO:0010951;GO:0016311;GO:0003993
CGI_10024590	-0.186733	0.0107961	1034.86	-0.328862	9.47717e-07	1134.92	-0.402404	0.000165465	1148.9	-0.306	mantle 9 [Salpingoeca rosetta]	0.515		unknown
CGI_10005652	-0.254338	0.000485709	410.555	-0.392848	9.20511e-08	450.21	-0.275403	5.13401e-05	422.592	-0.30753	tectonic-1-like isoform X3	0.6145		unknown
CGI_10010194	-0.18746	0.00700878	617.298	-0.33168	7.01061e-07	677.333	-0.407746	8.78854e-12	685.706	-0.308962	transmembrane 104-like [Aplysia californica]	0.7065		GO:0005623;GO:0015035;GO:0016021;GO:0006662;GO:0045454;GO:0055114
CGI_10006090	-0.246507	0.0348704	180.026	-0.251589	0.0382163	187.597	-0.429896	0.000156223	197.502	-0.309331	hypothetical protein CGI_10006090	1		GO:0016021
CGI_10004242	-0.228427	0.0181889	251.643	-0.247672	0.00519078	263.675	-0.454125	1.62347e-08	280.933	-0.310075	hypothetical protein CGI_10004242	1		unknown
CGI_10022459	-0.324475	5.17239e-05	330.725	-0.243563	0.00308822	333.326	-0.362406	4.21707e-06	342.885	-0.310148	histone deacetylase 11-like	0.7785		GO:0008152;GO:0016787
CGI_10021633	-0.418619	6.74133e-11	1420.27	-0.287979	6.20635e-05	1402.66	-0.227515	0.0161324	1347.29	-0.311371	N-acetylserotonin O-methyltransferase	0.617		GO:0008171;GO:0005515;GO:0005737;GO:0032259
CGI_10018375	-0.367239	3.52964e-07	1927.36	-0.187188	0.027316	1870.04	-0.381327	4.96658e-06	1979.76	-0.311918	hypothetical protein CGI_10018375	0.4517		GO:0016021
CGI_10015358	-0.33126	0.0153972	88.7796	-0.273716	0.0412971	90.2403	-0.330955	0.0207541	90.8512	-0.311977	SPARC-related modular calcium-binding 1-like isoform X2	0.9282		unknown
CGI_10018913	-0.28749	0.0183128	737.054	-0.297393	0.000664523	768.42	-0.357769	0.000460091	773.235	-0.314217	mucin-12-like isoform X1 [Aplysia californica]	0.768		GO:0004887;GO:0005634;GO:0008270;GO:0006351;GO:0003707;GO:0006355;GO:0043565;GO:0043401;GO:0030522
CGI_10010933	-0.180456	0.0192651	8263.44	-0.171001	0.0345994	8557.64	-0.594294	8.80486e-18	9935.7	-0.315251	latent-transforming growth factor beta-binding 1-like	0.702		unknown
CGI_10015438	-0.271091	0.00149054	2123.39	-0.359247	3.44756e-07	2282.31	-0.317415	2.68922e-05	2206.08	-0.315918	cytochrome b-c1 complex subunit mitochondrial	0.746		GO:0008121;GO:0005739;GO:0016020;GO:1902600;GO:0006122
CGI_10008997	-0.424877	2.51255e-06	1973.93	-0.237213	0.00920317	1906.44	-0.287536	0.00272209	1909.66	-0.316542	hypothetical protein CGI_10008997	0.94		unknown
CGI_10025219	-0.247597	0.0119174	170.349	-0.319423	0.000804698	182.028	-0.383921	0.000234398	183.477	-0.31698	Steryl-sulfatase	0.4965		GO:0008484;GO:0008152;GO:0016021
CGI_10025165	-0.382079	3.69707e-09	1668.12	-0.359707	8.13237e-08	1718.2	-0.223371	0.00202664	1602.15	-0.321719	CUG-BP- and ETR-3-like factor 2	0.8315		GO:0000166;GO:0003676
CGI_10027528	-0.336552	1.1955e-05	463.064	-0.224211	0.015274	461.294	-0.408124	2.64889e-08	486.484	-0.322962	ATP-binding cassette sub-family B member mitochondrial-like	0.6575		GO:0005524;GO:0042626;GO:0055085;GO:0005739;GO:0008152;GO:0016021
CGI_10005057	-0.300114	0.015214	187.949	-0.367696	0.00257988	200.727	-0.301357	0.0118496	192.125	-0.323056	basement membrane-specific heparan sulfate proteoglycan core -like	0.5175		unknown
CGI_10011642	-0.274298	0.0414146	94.6762	-0.356989	0.00651965	101.571	-0.339592	0.00691005	99.1162	-0.323626	Ceramide kinase	0.588		GO:0005634;GO:0043066;GO:0012505;GO:0044444;GO:0016310;GO:0016301
CGI_10022322	-0.456061	1.42913e-08	478.685	-0.276642	0.000989426	463.237	-0.246117	0.00236536	449.863	-0.326274	Neuroligin- X-linked	0.5885		GO:0007165;GO:0008152;GO:0016787
CGI_10014924	-0.309286	0.00418791	477.948	-0.227247	0.0396999	481.337	-0.445752	1.13087e-06	514.987	-0.327428	hypothetical protein CGI_10014924	1		unknown
CGI_10023567	-0.405539	4.18793e-18	6570.35	-0.317312	1.0905e-10	6597.14	-0.264766	0.000101446	6353.48	-0.329206	soma ferritin [Aplysia californica]	0.636		GO:0006879;GO:0005623;GO:0008199;GO:0006826;GO:0055114;GO:0004322
CGI_10021087	-0.217172	0.0486505	288.284	-0.400949	0.000861267	321.972	-0.373446	0.000181104	313.013	-0.330522	Tripartite motif-containing 45	0.538		GO:0008270;GO:0005622;GO:0016567
CGI_10014831	-0.338089	0.000220958	792.907	-0.27825	0.00556205	804.781	-0.380204	0.000618981	823.144	-0.332181	Solute carrier family 12 member 2	0.7035		GO:0005975;GO:0015377;GO:0015696;GO:1902476;GO:0016021;GO:0004553
CGI_10016930	-0.408638	0.00177953	157.394	-0.317946	0.0193843	157.625	-0.271344	0.0365563	152.017	-0.332643	glycosaminoglycan xylosylkinase	0.736		GO:0000166;GO:0016020;GO:0043167;GO:0005794;GO:0016773;GO:0044237;GO:1903955;GO:0005654
CGI_10016455	-0.394001	2.67345e-05	10837.2	-0.403894	3.13423e-06	11305.2	-0.200631	0.039901	10268.1	-0.332842	pancreatic triacylglycerol lipase-like	0.6375		GO:0006629;GO:0004806;GO:0005576
CGI_10004086	-0.360618	0.000329976	513.671	-0.341584	0.000122608	529.437	-0.296758	0.0113153	511.691	-0.332987	uncharacterized threonine-rich GPI-anchored glyco -like [Crassostrea gigas]	0.5635		unknown
CGI_10012092	-0.257029	0.0243495	385.571	-0.279548	0.0227814	404.426	-0.462741	0.000120133	427.381	-0.333106	uncharacterized LOC105340281	0.643		unknown
CGI_10026546	-0.295346	1.09695e-06	1287.77	-0.518829	1.27605e-15	1462.86	-0.185573	0.0250387	1261.35	-0.33325	hypothetical protein CGI_10026546	0.764		GO:0005509;GO:0006629
CGI_10022258	-0.361354	8.21083e-06	268.158	-0.371167	7.60547e-06	279.754	-0.268233	0.01255	264.151	-0.333584	ADP-ribosyl-[dinitrogen reductase] glycohydrolase-like [Biomphalaria glabrata]	0.761		GO:0004018;GO:0044208;GO:0006189;GO:0070626
CGI_10001938	-0.322668	0.000508719	215.034	-0.289501	0.00683858	220.939	-0.390295	0.00021191	225.905	-0.334155	rho guanine nucleotide exchange factor 10	1		unknown
CGI_10016116	-0.439156	6.15533e-06	570.288	-0.27828	0.000892661	556.044	-0.285216	0.00242106	548.203	-0.334217	zinc finger ZIC 4-like	0.66		GO:0003676;GO:0046872;GO:0030902
CGI_10015114	-0.283177	0.0230057	250.566	-0.264648	0.00753917	258.518	-0.455108	2.27914e-07	273.716	-0.334311	hypothetical protein CGI_10015114	1		unknown
CGI_10007111	-0.303184	0.019025	586.224	-0.238379	0.0383092	594.071	-0.463069	5.18755e-06	637.758	-0.334877	type I cytoskeletal 10-like	0.68		unknown
CGI_10013835	-0.30359	0.0466472	964.018	-0.424973	0.00015234	1050.23	-0.276085	0.00353723	972.329	-0.334883	PREDICTED: uncharacterized protein LOC105340609	1		unknown
CGI_10015732	-0.284966	0.0032841	213.446	-0.434308	8.77244e-06	235.064	-0.287923	0.00461479	217.989	-0.335732	dispatched homolog 1-like	0.6345		GO:0016021;GO:0008158;GO:0007224
CGI_10022741	-0.214085	0.00987542	232.444	-0.480622	1.28361e-10	268.182	-0.315101	7.9698e-05	246.561	-0.336603	cytochrome b5 reductase 4-like [Octopus bimaculoides]	0.704		GO:0016491;GO:0046872;GO:0055114;GO:0009987;GO:0020037
CGI_10004288	-0.29358	0.0143115	971.187	-0.358578	0.00243694	1035.33	-0.35875	0.00371405	1017.49	-0.336969	Formimidoyltransferase-cyclodeaminase	0.817		GO:0098588;GO:0005794;GO:0016740;GO:0044446;GO:0005542;GO:0044237
CGI_10023820	-0.402674	4.19023e-05	214.298	-0.201762	0.0369749	206.238	-0.412267	3.92162e-06	219.676	-0.338901	VPRBP	0.818		GO:0016021
CGI_10007768	-0.320053	9.83872e-07	567.312	-0.443693	3.23583e-06	619.765	-0.253671	0.00115043	564.74	-0.339139	soluble guanylate cyclase 88E-like [Crassostrea gigas]	0.725		GO:0008074;GO:0006182;GO:0004383;GO:0005886;GO:0004016;GO:0035556;GO:0020037
CGI_10002359	-0.365707	0.00277354	4002.57	-0.307443	0.00728948	4064.2	-0.346362	0.00237043	4054.33	-0.339837	hypothetical protein CGI_10002359	0.609		GO:0016021
CGI_10004863	-0.325431	0.00820546	2413.06	-0.275511	0.0107501	2458.76	-0.422372	0.000795647	2561.36	-0.341105	Cysteine-rich secretory Mr30	0.504		unknown
CGI_10025854	-0.343636	0.00239635	374.423	-0.310522	0.00464951	384.285	-0.370543	0.00106898	386.525	-0.341567	PREDICTED: uncharacterized protein LOC105335552 [Crassostrea gigas]	0.6567		GO:0016021
CGI_10006916	-0.286498	0.00584105	492.588	-0.369085	0.000231372	528.579	-0.375047	0.000123573	520.463	-0.343543	WD repeat-containing 37-like	0.741		unknown
CGI_10026115	-0.189717	0.0244284	463.95	-0.356578	2.86894e-06	513.952	-0.484474	1.05243e-08	531.682	-0.34359	1-phosphatidylinositol 4,5-bisphosphate phosphodiesterase delta-1-like isoform X2 [Lingula anatina]	0.6355		unknown
CGI_10005930	-0.323342	0.0416809	129.616	-0.399067	0.0314379	138.99	-0.309609	0.0457377	131.552	-0.344006	Retinol dehydrogenase 14	0.679		GO:0016491;GO:0055114
CGI_10026603	-0.469352	9.57525e-06	29766.8	-0.352464	0.00483195	29531.4	-0.212069	0.0318273	27462.7	-0.344628	chitinase 3	0.7545		GO:0004568;GO:0005975;GO:0008061;GO:0006032;GO:0005576
CGI_10025212	-0.139867	0.0483229	56217.1	-0.31684	6.80464e-10	62427.8	-0.577219	1.0906e-38	68074.2	-0.344642	collagen alpha-6(VI) chain-like	0.5875		GO:0005581;GO:0016021
CGI_10026114	-0.255375	4.90166e-06	2558.68	-0.250435	1.4986e-06	2654.5	-0.531222	1.14006e-16	2914.24	-0.345678	1-phosphatidylinositol 4,5-bisphosphate phosphodiesterase delta-1 isoform X2	0.745		GO:0004435;GO:0005509;GO:0016042;GO:0005543;GO:0004871;GO:0005622;GO:0035556
CGI_10019735	-0.3335	0.0036029	214.488	-0.412525	0.00054191	230.074	-0.295743	0.0129863	215.876	-0.347256	T family of potassium channels 18-like [Octopus bimaculoides]	0.662		GO:0071805;GO:0016021;GO:0005267
CGI_10027141	-0.476226	5.34316e-08	501.17	-0.211722	0.00400275	469.474	-0.354398	2.45552e-05	487.572	-0.347449	nose resistant to fluoxetine 6-like	0.6255		GO:0016747;GO:0008152;GO:0016021
CGI_10022060	-0.307926	0.0146178	102.978	-0.41235	0.000828159	111.301	-0.322478	0.00717076	105.433	-0.347585	apoptosis 1 inhibitor [Musca domestica]	0.7245		GO:0008270;GO:0050794;GO:0005737;GO:0043231;GO:0016021;GO:0044763;GO:0044446;GO:0006810
CGI_10022905	-0.344465	0.0159387	458.356	-0.40583	0.00219814	487.907	-0.303442	0.0341594	460.302	-0.351246	neuropeptides capa receptor-like [Octopus bimaculoides]	0.6114		GO:0004930;GO:0007186;GO:0016021
CGI_10018886	-0.321808	0.00164127	622.821	-0.454092	1.29162e-06	682.11	-0.286725	0.0109794	627.452	-0.354208	Partitioning defective 6 beta [Crassostrea gigas]	0.695		unknown
CGI_10021781	-0.379173	0.000243194	375.863	-0.34669	0.0015167	385.846	-0.339501	0.00100769	377.916	-0.355122	tripartite motif-containing 2-like isoform X5 [Lingula anatina]	0.8215		GO:0008270;GO:0005622;GO:0016567
CGI_10023505	-0.276661	0.0233962	328.345	-0.269402	0.00407384	340.578	-0.520932	1.24346e-05	370.157	-0.355665	sodium potassium calcium exchanger 5	0.7		GO:0006811;GO:0055085;GO:0016021
CGI_10005605	-0.347996	0.000769572	148.106	-0.322809	0.00621243	152.413	-0.396583	0.000740274	154.29	-0.355796	bcl-2 1 [Octopus bimaculoides]	0.6645		GO:0042981;GO:0043066;GO:0042981
CGI_10009062	-0.310892	0.000980363	583.05	-0.467424	5.57681e-10	644.364	-0.298189	0.00198674	592.025	-0.358835	hypothetical protein CGI_10009062	1		GO:0016021
CGI_10011804	-0.398712	3.93809e-05	321.726	-0.465611	1.07168e-06	343.801	-0.212943	0.0176923	305.756	-0.359088	ovarian cancer G- coupled receptor 1-like [Crassostrea gigas]	0.637		GO:0004930;GO:0007186;GO:0016021
CGI_10004937	-0.180779	0.0342058	339.987	-0.375878	0.000186693	380.764	-0.522532	1.66875e-09	396.522	-0.35973	dynein assembly factor axonemal	0.815		GO:0036158;GO:0071907;GO:0003341;GO:0044458;GO:0060972;GO:0005886;GO:0005930;GO:0045502;GO:0003356;GO:0005634;GO:0005737;GO:0001947;GO:0036159;GO:0071910;GO:0030324;GO:0035469
CGI_10010905	-0.205624	0.0368213	517.742	-0.566656	1.29897e-10	621.072	-0.307155	0.000879501	549.618	-0.359812	tetraspanin-1-like [Crassostrea gigas]	0.6915		GO:0016021
CGI_10026261	-0.341718	8.51372e-06	1507.21	-0.245443	0.00160152	1509.22	-0.492934	3.17481e-11	1634.22	-0.360032	xaa-Pro aminopeptidase 1 isoform X1 [Falco peregrinus]	0.6785		GO:0046872;GO:0006508;GO:0004177
CGI_10025096	-0.498698	9.27741e-05	822.815	-0.318716	0.00988999	794.866	-0.265265	0.00773665	764.356	-0.360893	BPTI Kunitz domain-containing 4-like	0.6233		GO:0004867;GO:0010951
CGI_10011132	-0.288322	0.0353605	153.071	-0.424924	0.0025094	168.257	-0.372627	0.0013015	161.732	-0.361958	Fibroblast growth factor receptor 2	0.9775		GO:0005524;GO:0018108;GO:0004713;GO:0016021
CGI_10010751	-0.3256	0.0011661	189.954	-0.390428	1.87314e-05	202.361	-0.371561	0.000128169	197.696	-0.36253	RNA-binding NOB1 isoform X1	0.7625		GO:0090501;GO:0042274;GO:0006364
CGI_10011130	-0.419011	3.18669e-06	2967.75	-0.370893	0.000632953	3027.79	-0.303348	0.00050087	2895.19	-0.364418	tyrosine- kinase	0.7435		GO:0005524;GO:0018108;GO:0004713;GO:0016021
CGI_10023441	-0.389937	2.78309e-06	1391.51	-0.314234	0.00039686	1404.48	-0.389842	4.40319e-05	1421.68	-0.364671	tartrate-resistant acid phosphatase type 5-like isoform X1 [Lingula anatina]	0.707		GO:0016311;GO:0003993
CGI_10001623	-0.304685	0.000789949	471.324	-0.434002	5.18498e-05	515.937	-0.356276	0.00501844	491.479	-0.364987	PTSP-like peptide neurotransmitter precursor [Aplysia californica]	0.635		unknown
CGI_10018891	-0.370392	0.000892868	175.317	-0.234486	0.043576	172.839	-0.491892	2.99672e-06	188.18	-0.36559	TPR repeat-containing DDB_G0287407-like	0.607		GO:0005524
CGI_10028707	-0.386919	0.020481	88.2862	-0.301673	0.0411548	88.6009	-0.410777	0.00658873	90.769	-0.366456	ankyrin repeat domain-containing 16-like	0.6835		unknown
CGI_10008001	-0.245183	0.0125655	207.037	-0.465479	0.000218528	234.759	-0.391222	0.00434299	223.801	-0.367295	Ceroid-lipofuscinosis neuronal 5	0.6845		GO:0022008;GO:0005764
CGI_10012353	-0.473999	2.51053e-06	1747.84	-0.259719	0.0131979	1668.83	-0.369342	0.00277658	1711.95	-0.367686	Aldose 1-epimerase	0.5344		GO:0008061;GO:0006030;GO:0005576
CGI_10024756	-0.384883	0.00137595	142.302	-0.402664	0.00204035	149.022	-0.317276	0.0260489	141.469	-0.368274	PREDICTED: uncharacterized protein LOC105326246 [Crassostrea gigas]	0.64		GO:0016021
CGI_10010087	-0.329499	0.00226908	253.097	-0.546386	5.16427e-09	286.78	-0.230338	0.0392184	248.81	-0.368741	Nucleolar 14	0.6695		GO:0032040;GO:0044428
CGI_10025001	-0.292555	9.3533e-06	6775.46	-0.276507	0.0116194	7003.55	-0.539059	1.00453e-12	7634.42	-0.369373	calponin homology domain-containing DDB_G0272472-like isoform X1 [Crassostrea gigas]	0.682		unknown
CGI_10014846	-0.408709	0.000689161	179.619	-0.39793	0.000334409	185.621	-0.301632	0.0131639	175.953	-0.369423	phosphoribosylformylglycinamidine synthase	0.7925		GO:0005524;GO:0005737;GO:0006189;GO:0006541;GO:0004642
CGI_10012105	-0.524932	7.74983e-06	247.856	-0.240063	0.0358591	229.992	-0.343579	0.00117551	235.064	-0.369525	hypothetical protein CGI_10012105	1		GO:0016021
CGI_10027350	-0.357235	0.000230752	912.297	-0.336578	0.00895301	941.487	-0.418894	9.52711e-06	954.669	-0.370902	dual specificity tyrosine-phosphorylation-regulated kinase 4-like isoform X1 [Crassostrea gigas]	0.938		GO:0005524;GO:0004672;GO:0006468
CGI_10017672	-0.338577	0.00331035	6447.22	-0.317632	0.026893	6650.92	-0.462722	2.3683e-05	6917.69	-0.372977	uncharacterized LOC105328182	0		unknown
CGI_10006164	-0.366783	1.39516e-07	649.98	-0.448935	2.94823e-06	698.454	-0.308018	0.00539796	649.258	-0.374579	centlein isoform X2	0.675		unknown
CGI_10028875	-0.417533	2.94013e-05	1432.59	-0.289774	0.00632909	1415.9	-0.41904	1.05112e-05	1463.43	-0.375449	liver carboxylesterase 2-like	0.6505		GO:0008152;GO:0016787
CGI_10026351	-0.356913	7.76422e-06	759.255	-0.422578	1.34839e-07	809.729	-0.347776	6.07464e-05	772.704	-0.375756	pre-rRNA processing FTSJ3-like	0.8455		GO:0000463;GO:0008650;GO:0005730;GO:0000466;GO:0030687;GO:0016435;GO:0000453
CGI_10021549	-0.356229	0.00132563	694.147	-0.422393	1.58047e-06	740.27	-0.348787	0.0025703	706.581	-0.375803	balbiani ring 1-like	0.69		unknown
CGI_10015970	-0.451739	2.40207e-07	1208.68	-0.392646	8.36643e-06	1226.62	-0.285676	0.00116644	1155.36	-0.376687	long-chain-fatty-acid-- ligase 1-like isoform X3 [Lepisosteus oculatus]	0.735		GO:0016020;GO:0008152;GO:0044763;GO:0016874
CGI_10007505	-0.334825	0.000947389	279.176	-0.380705	0.000163676	295.475	-0.415595	1.41646e-06	294.373	-0.377042	Tripartite motif-containing 2	0.8665		GO:0008270;GO:0005622;GO:0016567
CGI_10018743	-0.246488	0.0013705	111830	-0.388949	1.16881e-06	122823	-0.50421	2.32006e-20	126306	-0.379882	hypothetical protein CGI_10018743	0.8275		unknown
CGI_10013969	-0.546594	1.20162e-08	294.922	-0.291428	0.0241839	276.962	-0.303704	0.0243453	273.211	-0.380576	YLP motif-containing 1-like isoform X5	0.9917		unknown
CGI_10011645	-0.339252	3.02684e-08	1351.59	-0.223787	0.000583642	1344.19	-0.582323	1.14005e-09	1524.42	-0.381787	galanin receptor type 1-like isoform X1 [Crassostrea gigas]	0.7085		GO:0004930;GO:0007186;GO:0016021
CGI_10003863	-0.281885	0.0114013	138.031	-0.463836	2.34208e-05	154.264	-0.401983	0.000152655	147.65	-0.382568	probable cytosolic iron-sulfur assembly CIAO1	0.8455		GO:0071817;GO:0007059;GO:0097361;GO:0016226
CGI_10004832	-0.262057	0.0087293	228.973	-0.487102	2.42972e-07	260.157	-0.398809	7.91463e-06	246.397	-0.382656	Transmembrane prolyl 4-hydroxylase	0.6005		GO:0043167;GO:0044699
CGI_10024564	-0.397275	0.00023026	18311.8	-0.39582	3.57598e-08	18998.6	-0.356756	0.000738594	18394.2	-0.383284	hypothetical protein CGI_10024564	0.6275		GO:0030414;GO:0016021;GO:0005576;GO:0010466
CGI_10025095	-0.396018	1.07992e-07	2504.22	-0.469841	1.83013e-13	2680.12	-0.292224	2.66199e-06	2454.45	-0.386028	hypothetical protein CGI_10025095	0.8883		unknown
CGI_10016341	-0.532112	1.2711e-06	349.553	-0.370606	0.00033521	339.971	-0.25558	0.0144385	319.54	-0.386099	paramyosin-like isoform X1 [Crassostrea gigas]	0.561		unknown
CGI_10015596	-0.416942	1.33477e-06	270.562	-0.415651	8.20546e-08	280.903	-0.33461	0.000122005	267.343	-0.389068	cancer-related nucleoside-triphosphatase	0.712		GO:0005524;GO:0016311;GO:0098519
CGI_10022445	-0.392029	2.16113e-06	3284.58	-0.464935	2.45179e-07	3516.12	-0.310857	7.05141e-05	3248.15	-0.389274	Seleno N	0.537		GO:0048583;GO:0044707;GO:0016020;GO:0009987
CGI_10025882	-0.511772	3.2785e-05	120.222	-0.333565	0.0375509	116.192	-0.323063	0.01051	113.727	-0.389467	hypothetical protein CGI_10025882	1		GO:0016021
CGI_10021554	-0.371517	0.00610223	7016.81	-0.405284	0.000761898	7387.58	-0.392286	0.000243475	7216.27	-0.389696	neurotrypsin- partial	0.486		unknown
CGI_10025480	-0.448282	7.99827e-08	1397.77	-0.24239	0.000101537	1339.49	-0.487086	4.03869e-08	1449.78	-0.392586	serine palmitoyltransferase 2-like	0.8125		GO:0030170;GO:0016021;GO:0009058;GO:0016740
CGI_10015038	-0.399651	0.000102334	289.984	-0.231301	0.0171855	282.234	-0.547449	7.94461e-07	314.833	-0.392801	multiple epidermal growth factor-like domains 10	0.6245		GO:0016021
CGI_10014876	-0.228059	0.0285468	163.332	-0.431424	1.78103e-05	183.809	-0.525408	5.47569e-06	187.955	-0.394964	UPF0394 inner membrane -like	0.588		GO:0016021
CGI_10016271	-0.270665	0.000686794	1316.08	-0.687861	1.21691e-19	1620.8	-0.233993	0.0225147	1325.62	-0.397507	pancreatic triacylglycerol lipase-like	0.5765		GO:0006629;GO:0004806;GO:0005576
CGI_10014918	-0.437525	6.61035e-08	579.048	-0.291742	0.00021308	568.064	-0.465447	9.79598e-09	597.738	-0.398238	MORN repeat-containing 1-like isoform X3	0.7855		unknown
CGI_10014634	-0.394772	0.0032841	587.533	-0.488991	0.000290312	634.747	-0.311462	0.0295215	580.316	-0.398408	SH3 and cysteine-rich domain-containing 3	0.714		unknown
CGI_10020613	-0.343185	0.000173324	206.542	-0.596614	1.84857e-12	237.546	-0.256148	0.00519595	203.697	-0.398649	neuropeptide Y receptor-like [Crassostrea gigas]	0.9225		unknown
CGI_10020332	-0.409647	0.000663604	119.479	-0.403942	0.000606561	123.823	-0.382547	0.000881909	120.698	-0.398712	dimmed-like [Aplysia californica]	0.8365		GO:0046983
CGI_10003669	-0.454415	0.000404602	130.215	-0.360944	0.00371205	130.194	-0.383123	0.00322879	129.22	-0.399494	G- coupled receptor 26-like	0.6144		GO:0016021
CGI_10023781	-0.462141	2.05844e-05	2338.2	-0.355068	0.00600418	2328.74	-0.387522	4.51374e-06	2314.29	-0.401577	Alpha-amylase 1	0.7345		GO:0004556;GO:0005975;GO:0043169
CGI_10016398	-0.503144	1.16326e-17	582.719	-0.24433	0.000798833	547.141	-0.458218	3.73229e-08	584.61	-0.401898	oxidoreductase HTATIP2-like	0.6865		GO:0016021
CGI_10002254	-0.30228	0.0193375	112.556	-0.386938	0.00172916	121.223	-0.51902	0.000344112	125.845	-0.402746	sodium potassium calcium exchanger 4	0.721		GO:0055085;GO:0016021;GO:0015085;GO:0031420
CGI_10017869	-0.453702	3.87376e-09	459.092	-0.498823	4.80422e-11	485.612	-0.258818	0.00169525	434.212	-0.403781	gephyrin-like isoform X2	0.773		GO:0060077;GO:0061598;GO:0043167;GO:0061599;GO:0006777;GO:0045184;GO:0030425;GO:0005515;GO:0097112;GO:0005737;GO:0045211;GO:0031234;GO:0072579;GO:0018315
CGI_10017676	-0.364581	0.00385949	2663.88	-0.535444	1.32683e-06	2966.69	-0.323457	0.000743093	2673.63	-0.407827	atrial natriuretic peptide receptor 1-like	0.6865		GO:0006182;GO:0042802;GO:1900194;GO:0004383;GO:0042562;GO:0004672;GO:0007166;GO:0043234;GO:0006468;GO:0008217;GO:0005622;GO:0005886;GO:0044702;GO:0060348;GO:0005524;GO:0016021;GO:0035556;GO:0016941;GO:0051447
CGI_10013239	-0.310311	0.000750521	322.162	-0.41676	2.19563e-05	349.136	-0.497662	2.39988e-05	354.818	-0.408244	Zonadhesin	1		unknown
CGI_10020660	-0.392374	2.02135e-05	2076.43	-0.281749	0.00921848	2066.53	-0.556604	2.83689e-06	2269.77	-0.410242	ankyrin repeat and KH domain-containing 1-like	0.7055		unknown
CGI_10019708	-0.494995	0.000189967	112.715	-0.425559	0.000808445	113.62	-0.315131	0.0168449	106.954	-0.411895	BTB POZ domain-containing 17-like isoform X2 [Crassostrea gigas]	0.8325		unknown
CGI_10008675	-0.472156	1.5574e-06	260.252	-0.473149	0.000193601	270.684	-0.291679	0.00628771	247.208	-0.412328	glucosylceramidase- partial	0.749		GO:0004348;GO:0031329;GO:0005975;GO:0048583;GO:0032268;GO:0010646;GO:0034641;GO:0031325;GO:0048519;GO:0043227;GO:0006665
CGI_10010175	-0.340285	0.00647535	171.858	-0.484227	1.40426e-07	189.032	-0.412967	6.73782e-05	180.546	-0.412493	TTD14_DROME ame: Full=TRPL translocation defect 14	0.6495		GO:0071482;GO:0090316;GO:0005829
CGI_10015320	-0.520127	0.00193159	181.969	-0.394545	2.78496e-05	178.675	-0.326783	0.00523938	171.258	-0.413818	carboxylesterase type B	0.664		GO:0065007;GO:0008152;GO:0016021;GO:0044699
CGI_10005109	-0.220133	0.0344474	1537.93	-0.512259	2.50873e-07	1794.25	-0.511058	2.1652e-11	1759.9	-0.414483	tumor necrosis factor ligand superfamily member 10	0.62		GO:0006955;GO:0016021;GO:0005164;GO:0043065;GO:0042981
CGI_10005864	-0.432777	0.000212758	2747.64	-0.38439	0.000866931	2799.14	-0.427354	0.000970247	2799.45	-0.41484	ATP-binding cassette sub-family A member 1	0.724		GO:0016887;GO:0065008;GO:0010033;GO:0034186;GO:0044444;GO:0042157;GO:0044763;GO:0006820;GO:0005887;GO:0005524;GO:0022892;GO:0006911;GO:0050794;GO:0043691;GO:0043231;GO:0051716;GO:0033344
CGI_10013704	-0.35379	0.0104591	306.966	-0.308324	0.0300449	313.399	-0.583733	8.55791e-11	343.624	-0.415282	adenylate cyclase type 10-like	0.56		GO:0016849;GO:0005622;GO:0009190;GO:0035556
CGI_10002330	-0.381007	3.13257e-13	1397.66	-0.497821	8.52214e-11	1523.27	-0.367838	3.1016e-07	1419.99	-0.415555	cingulin-like isoform X6	0.5705		unknown
CGI_10022584	-0.365751	0.000333417	385.779	-0.489677	3.16251e-06	421.515	-0.391316	0.000208901	397.855	-0.415581	pro convertase subtilisin kexin type partial	0.616		GO:0006508;GO:0016021;GO:0004252
CGI_10015925	-0.316166	0.000380904	561.277	-0.469647	1.07752e-08	619.974	-0.473715	1.09243e-08	609.979	-0.419842	activated RNA polymerase II transcriptional coactivator p15-like [Limulus polyphemus]	0.83		GO:0003677;GO:0003713;GO:0006355
CGI_10005469	-0.469176	0.00788942	48.8474	-0.392763	0.0284718	49.0248	-0.397884	0.0347072	48.2865	-0.419941	nucleoredoxin 2	0.696		GO:0045494;GO:0007600
CGI_10020071	-0.602059	1.23985e-10	1088.97	-0.445699	1.00202e-06	1060.72	-0.213412	0.00785599	951.638	-0.42039	hypothetical protein CGI_10020071	0.915		unknown
CGI_10020551	-0.276345	0.00202335	450.612	-0.503282	6.65134e-08	512.772	-0.484735	1.3336e-06	500.011	-0.421454	kin of IRRE 2 isoform X1 [Crassostrea gigas]	0.5635		unknown
CGI_10009107	-0.42845	0.00360864	135.426	-0.549643	8.54912e-05	147.805	-0.287032	0.0433187	130.597	-0.421708	hypothetical protein CGI_10009107	0.9		unknown
CGI_10020884	-0.343241	0.00017934	204.897	-0.701668	1.21038e-20	246.821	-0.221255	0.018876	199.752	-0.422055	yae1 domain-containing 1 isoform X2 [Alligator sinensis]	0.528		unknown
CGI_10023693	-0.484132	7.71335e-05	399.403	-0.414421	5.52279e-06	403.049	-0.371299	1.25731e-06	389.18	-0.423284	cysteine- acidic integral membrane -like	0.6325		unknown
CGI_10009160	-0.514293	0.000225928	469.807	-0.379964	0.00165597	461.781	-0.375793	0.00390926	453.083	-0.42335	solute carrier family 23 member 2-like [Crassostrea gigas]	0.7035		GO:0055085;GO:0016021;GO:0005215
CGI_10015143	-0.402822	5.35957e-05	221.207	-0.364504	0.000227401	226.321	-0.513361	4.8357e-09	236.045	-0.426896	O-linked-mannose beta-1,2-N-acetylglucosaminyltransferase 1-like	0.7265		GO:0008375;GO:0016020;GO:0006486
CGI_10010381	-0.343712	0.0249376	286.886	-0.335735	0.00111477	296.539	-0.602001	0.000619874	326.857	-0.427149	probable serine threonine- kinase pats1	0.505		GO:0007165
CGI_10018253	-0.414475	0.00136334	1252.58	-0.374282	0.000147186	1279.36	-0.497231	8.98801e-07	1321.09	-0.428663	CLN8 isoform X1 [Homo sapiens]	0.6705		GO:0065007;GO:0019538;GO:0009057;GO:0007399;GO:0008203;GO:0005783;GO:0005793;GO:0006672;GO:0006644;GO:0007610;GO:0016021;GO:0016043;GO:0050877
CGI_10019373	-0.616137	1.08488e-06	7170.1	-0.387903	0.00529378	6779.48	-0.284356	0.0256068	6389.96	-0.429465	membrane [Anditalea andensis]	0.5765		unknown
CGI_10016589	-0.474699	4.14254e-06	290.342	-0.36536	0.0020925	288.839	-0.450394	6.85215e-05	293.798	-0.430151	VPRBP isoform X2	0.6825		GO:0044699;GO:0009987
CGI_10014342	-0.620796	5.96333e-08	294.105	-0.400842	2.67538e-05	278.724	-0.271621	0.0144759	260.411	-0.431086	beta-lactamase domain-containing 2-like isoform X1 [Crassostrea gigas]	0.576		unknown
CGI_10026900	-0.301357	0.00184824	2346.07	-0.462554	4.57811e-05	2601.4	-0.529522	4.45023e-09	2624.04	-0.431145	Kv channel-interacting 4-like	0.6163		GO:0005509
CGI_10022006	-0.328589	0.000347953	400.841	-0.587727	3.65361e-12	462.775	-0.37867	9.99481e-05	417.154	-0.431662	Collagen alpha-1(XII) chain	0.6215		GO:0005581;GO:0044421;GO:0031012
CGI_10005839	-0.671521	2.74062e-06	196.009	-0.354665	0.0103889	178.314	-0.270127	0.0454695	169.489	-0.432104	Tripartite motif-containing 2	0.5495		GO:0008270;GO:0005622;GO:0016567
CGI_10006745	-0.47689	6.39268e-06	135.799	-0.308399	0.0195681	131.872	-0.51177	2.19107e-07	140.651	-0.432353	Leucine-rich repeat-containing 61	0.706		GO:0008063
CGI_10027194	-0.676568	4.13209e-07	529.232	-0.286399	0.0349299	467.602	-0.334294	0.00433044	467.798	-0.43242	probable serine threonine- kinase fhkB	0.5675		unknown
CGI_10019492	-0.436745	0.00760744	4917.37	-0.495808	0.000386503	5229.59	-0.364954	0.00428178	4867.45	-0.432502	vacuolar sorting-associated 8 homolog	0.782		GO:0008270;GO:0016192;GO:0006886;GO:0005622
CGI_10006106	-0.496899	0.000171381	4490.75	-0.325901	0.0291749	4355.81	-0.479147	0.000788803	4553.04	-0.433982	Collagen alpha-4(VI) chain	0.6445		unknown
CGI_10014361	-0.222195	0.0253147	224.343	-0.679852	6.04228e-08	280.954	-0.401861	0.000583496	245.507	-0.434636	glucose transporter isoform D [Drosophila melanogaster]	0.734		GO:0055085;GO:0090277;GO:0016021;GO:0008643;GO:0019233;GO:0005355
CGI_10012772	-0.27606	0.0191866	177.326	-0.297715	0.0135721	185.917	-0.730871	2.73879e-11	218.43	-0.434882	ankyrin repeat [Trichomonas vaginalis G3]	0.603		GO:0007165;GO:0000502
CGI_10014244	-0.21487	5.61974e-05	1140.86	-0.203302	0.000193725	1180.45	-0.892506	3.46233e-39	1542.9	-0.436893	mechanosensory 2-like isoform X3	0.9005		GO:0016021
CGI_10002429	-0.390225	0.0471425	363.842	-0.591669	1.12969e-05	410.027	-0.344511	0.0166487	363.779	-0.442135	partial [Nematostella vectensis]	0.4975		unknown
CGI_10017982	-0.512016	2.33293e-05	97563.2	-0.462498	0.00029517	99367.3	-0.352968	0.00226168	93352.3	-0.442494	per-hexamer repeat 5 isoform X48	0.84		unknown
CGI_10022444	-0.539015	9.00728e-10	3570.01	-0.320775	0.000154504	3398.09	-0.468964	2.02522e-09	3540.27	-0.442918	PREDICTED: uncharacterized protein LOC105347062	0.94		unknown
CGI_10018996	-0.583305	4.8633e-15	1087.67	-0.252937	0.030702	990.921	-0.49644	5.30165e-05	1073.12	-0.444228	cell wall DAN4-like	1		GO:0016021
CGI_10015942	-0.418227	0.00303503	311.042	-0.458927	0.00596987	329.132	-0.457604	0.00351716	322.96	-0.444919	hypothetical protein CGI_10015942	0.7635		unknown
CGI_10021062	-0.530609	1.77077e-07	180.681	-0.495748	1.35219e-05	185.036	-0.308626	0.00512741	168.562	-0.444994	Serine-threonine kinase receptor-associated	0.814		GO:0016310;GO:0016301
CGI_10022255	-0.378678	0.000233915	139.298	-0.321143	0.00848233	141.583	-0.635316	1.17502e-10	158.015	-0.445046	probable leucine--tRNA mitochondrial	0.666		GO:0005524;GO:0006429;GO:0004823;GO:0006450;GO:0002161;GO:0044444
CGI_10014988	-0.408136	0.000868167	389.959	-0.575206	3.89436e-06	434.514	-0.352485	0.0129338	389.695	-0.445276	endochitinase A-like [Crassostrea gigas]	0.5655		GO:0019028
CGI_10026888	-0.518803	0.000386567	84.538	-0.394334	0.00610858	83.4756	-0.422976	0.00149468	82.8669	-0.445371	tRNA methyltransferase 10 homolog B isoform X2 [Canis lupus familiaris]	0.681		GO:0008168;GO:0032259
CGI_10009442	-0.429141	0.00158811	173.149	-0.50872	0.000295449	185.994	-0.405675	0.00400166	175.003	-0.447845	Short-chain collagen C4	0.5571		GO:0016021
CGI_10003601	-0.453522	0.00314062	2611.22	-0.434359	0.000179721	2686.85	-0.465831	1.01056e-06	2671.42	-0.451237	epithelial chloride channel -like	0.565		unknown
CGI_10023416	-0.414609	2.50634e-05	283.844	-0.554024	7.26694e-10	312.044	-0.3854	0.000111578	286.357	-0.451344	Tripartite motif-containing 2	0.8565		GO:0003677;GO:0004820;GO:0005524;GO:0008270;GO:0006426;GO:0003713;GO:0005737;GO:0006355;GO:0016567
CGI_10013877	-0.416159	0.00584171	334.6	-0.388668	5.05358e-06	343.266	-0.550341	9.4794e-11	360.04	-0.451723	hypothetical protein CGI_10013877	0.752		unknown
CGI_10021479	-0.265762	0.0251095	452.45	-0.539208	6.4525e-06	524.935	-0.550848	2.84287e-05	518.832	-0.451939	leucine-rich repeat and guanylate kinase domain-containing -like	0.722		GO:0016310;GO:0016301
CGI_10016303	-0.441968	0.0009577	660	-0.624987	1.65499e-09	739.217	-0.290351	0.00966034	633.676	-0.452435	cytochrome P450 3A19-like	0.7935		GO:0005506;GO:0016705;GO:0016021;GO:0055114;GO:0004497;GO:0020037
CGI_10005377	-0.460365	1.22586e-09	1052.35	-0.716942	8.69361e-12	1220.81	-0.182354	0.012326	964.706	-0.45322	MAM domain-containing 2	0.6175		GO:0016020
CGI_10003112	-0.701456	1.39091e-10	705.234	-0.257423	0.0228458	610.873	-0.401467	0.000414246	634.981	-0.453449	Dynactin subunit 1	0.862		GO:0007154;GO:0007275;GO:0016021
CGI_10022091	-0.45215	0.00187388	6398.59	-0.500155	1.92566e-06	6768.25	-0.41649	4.12183e-05	6425.32	-0.456265	complement C1q 4 isoform X2 [Crassostrea gigas]	0.67		unknown
CGI_10026776	-0.289009	0.00789148	497.619	-0.547129	7.93877e-11	573.06	-0.535628	6.29362e-11	560.455	-0.457255	hypothetical protein CGI_10026776	0.9943		unknown
CGI_10019968	-0.47036	3.07603e-06	181.065	-0.504896	3.08589e-06	190.976	-0.39866	0.000208603	179.574	-0.457972	tripartite motif-containing 2-like	0.548		GO:0008270;GO:0016021;GO:0005622;GO:0016567
CGI_10025002	-0.378248	0.000503065	201.552	-0.748917	1.06872e-15	244.432	-0.249021	0.0128484	195.533	-0.458729	ketimine reductase mu-crystallin	0.743		GO:0042803;GO:0042403;GO:0000122;GO:0007605;GO:0005634;GO:0050661;GO:0070062;GO:0006839;GO:0003714;GO:0016491;GO:0005739;GO:0070324;GO:0005829;GO:0070327
CGI_10007817	-0.519155	1.20193e-05	4301.77	-0.65884	2.80786e-10	4739.39	-0.198749	0.0494791	3865.86	-0.458915	transforming growth factor-beta-induced ig-h3-like	0.5685		unknown
CGI_10020495	-0.552898	0.00692385	221.38	-0.376162	0.0301965	212.877	-0.447913	0.0103101	215.477	-0.458991	thyrotropin receptor-like	0.647		GO:0007186;GO:0016021;GO:0016500;GO:0008063
CGI_10022427	-0.261355	0.00346767	1085.09	-0.375426	3.18398e-05	1178.84	-0.747379	3.03177e-20	1352.24	-0.461387	receptor-type tyrosine- phosphatase T-like	0.6565		GO:0004725;GO:0016021;GO:0035335
CGI_10014425	-0.523223	0.000499111	79.7206	-0.331477	0.0161175	76.5992	-0.529599	3.4412e-05	81.4768	-0.461433	limbic system-associated membrane -like [Crassostrea gigas]	0.63		unknown
CGI_10024086	-0.471454	1.29004e-05	158.868	-0.461173	1.97165e-05	164.691	-0.456112	5.62846e-06	161.06	-0.462913	homeobox Hox- partial	0.878		GO:0005634;GO:0006355;GO:0043565
CGI_10025388	-0.569426	4.83631e-09	289.25	-0.291626	0.00624688	268.673	-0.527712	7.59887e-07	290.187	-0.462921	beclin 1-associated autophagy-related key regulator	0.613		GO:0010508;GO:0050790;GO:0030176;GO:0019348;GO:0030234;GO:0010506
CGI_10014212	-0.371298	0.000370437	686.451	-0.36879	0.000128104	712.271	-0.650705	2.19896e-14	785.741	-0.463597	WD repeat-containing 19-like	0.833		GO:0008152;GO:0004364
CGI_10004921	-0.632247	5.41489e-08	1800.76	-0.347456	0.00560701	1664.21	-0.411169	5.39649e-05	1675.71	-0.463624	signal transduction with efhand domain	0.537		unknown
CGI_10018232	-0.467914	0.000404602	710.77	-0.520431	1.02567e-05	754.315	-0.403809	0.00675339	707.384	-0.464051	hypothetical protein CGI_10018232	0.995		unknown
CGI_10018386	-0.396121	0.00252198	250.029	-0.598223	4.57169e-05	282.91	-0.399629	0.000235176	255.509	-0.464658	phospholipase ABHD3	0.712		GO:0008152;GO:0016021;GO:0016787
CGI_10007550	-0.484305	2.60647e-07	582.556	-0.431979	7.1712e-07	592.292	-0.481809	6.03584e-05	594.514	-0.466031	transient receptor potential cation channel subfamily A member 1 homolog	0.64		GO:0005216;GO:0034220;GO:0016021
CGI_10027689	-0.574356	0.000100561	2531.6	-0.528037	0.000188857	2577.42	-0.295741	0.0130705	2302.1	-0.466045	beta-1,3-glucan-binding -like	0.72		GO:0005975;GO:0004553;GO:0002221
CGI_10013973	-0.319499	0.00698384	667.484	-0.813407	7.28314e-21	852.309	-0.267007	0.00622902	667.282	-0.466638	aldose 1-epimerase-like	0.6525		GO:0019318;GO:0004034;GO:0030246
CGI_10014136	-0.525728	1.74352e-10	610.347	-0.389504	1.56525e-05	600.625	-0.484933	5.51782e-08	612.998	-0.466722	tyrosine- phosphatase 10D-like	0.5455		GO:0004725;GO:0016021;GO:0035335
CGI_10012083	-0.414665	0.014402	51.0631	-0.611322	4.81787e-05	57.4401	-0.377851	0.0299518	51.2923	-0.467946	zinc finger 451-like [Crassostrea gigas]	0.6635		GO:0046872
CGI_10016297	-0.359615	0.0135938	261.653	-0.697156	4.02499e-07	313.215	-0.348277	0.0489015	266.137	-0.468349	retinol dehydrogenase 12-like	0.739		GO:0016491;GO:0055114
CGI_10018167	-0.439177	7.12984e-05	2788.83	-0.470869	2.27929e-09	2932.1	-0.495579	6.99293e-11	2909.12	-0.468542	integumentary mucin -like isoform X1	0.7887		GO:0016021
CGI_10027259	-0.585001	1.68556e-05	107.176	-0.480351	0.000133426	106.426	-0.340346	0.00743276	98.898	-0.468566	hypothetical protein CGI_10027259	0.7743		unknown
CGI_10018097	-0.477216	0.000254694	90.2747	-0.374337	0.0325126	89.9967	-0.554691	1.09254e-05	95.2139	-0.468748	denticleless homolog	0.6895		unknown
CGI_10026341	-0.381477	0.0166513	95.8887	-0.441973	0.0114599	102.505	-0.583017	4.56087e-05	106.288	-0.468822	hypothetical protein CGI_10026341	0.71		GO:0008270;GO:0005622
CGI_10026327	-0.606586	1.1247e-08	370.863	-0.366608	0.00170081	349.35	-0.433834	6.90339e-06	352.382	-0.46901	Neuronal acetylcholine receptor subunit alpha- partial	0.63		GO:0004889;GO:0045211;GO:0098655;GO:0016021;GO:0030054
CGI_10025226	-0.438964	0.000459978	801.661	-0.456838	0.00068783	839.767	-0.514077	8.67507e-06	843.74	-0.469959	ctenidin-1-like [Crassostrea gigas]	1		GO:0016021
CGI_10004478	-0.431331	8.6149e-06	16459.9	-0.554332	6.15041e-09	17991.8	-0.424781	1.37656e-07	16751.8	-0.470148	mesenchyme-specific cell surface glyco -like [Crassostrea gigas]	0.6245		GO:0007229;GO:0005509
CGI_10021025	-0.377735	0.00645842	186.791	-0.364263	0.0217713	193.344	-0.669026	3.77312e-07	215.625	-0.470341	hypothetical protein CGI_10021025	1		unknown
CGI_10009226	-0.398592	5.0402e-06	432.792	-0.536038	9.34686e-08	475.795	-0.491753	0.000102918	459.454	-0.475461	sporozoite surface 2-like [Crassostrea gigas]	0.9175		unknown
CGI_10014684	-0.401009	0.00694181	410.794	-0.418111	0.0124781	430.4	-0.607325	2.01879e-06	456.715	-0.475482	neurocalcin homolog [Lingula anatina]	0.7435		GO:0005509
CGI_10011863	-0.460332	0.00866992	71.2208	-0.460889	0.00225935	73.7757	-0.506657	0.00217475	73.7976	-0.475959	poly(A) RNA polymerase GLD2-like	0.701		unknown
CGI_10013706	-0.486955	0.000605295	1126.3	-0.325445	0.0115294	1095.51	-0.615911	3.50093e-06	1213.66	-0.476104	4-coumarate-- ligase-like [Biomphalaria glabrata]	0.7095		GO:0008152;GO:0016874
CGI_10001325	-0.555175	1.03691e-07	1493.08	-0.550364	5.4768e-12	1546.77	-0.323904	3.09403e-05	1386.93	-0.476481	dynein heavy chain axonemal-like	0.912		GO:0016887;GO:0005524;GO:0003777;GO:0008152;GO:0030286;GO:0007018
CGI_10026926	-0.571307	3.008e-11	1064.9	-0.357673	6.56108e-06	1014.49	-0.503586	3.22111e-08	1057.2	-0.477522	centriolar coiled-coil of 110 kDa	0.693		unknown
CGI_10015185	-0.354856	0.00936288	424.781	-0.478089	0.00112858	464.413	-0.604081	1.70383e-07	480.094	-0.479008	sodium-dependent proline transporter-like isoform X1 [Lingula anatina]	0.68		GO:0006836;GO:0005328;GO:0055085;GO:0016021
CGI_10006507	-0.54583	1.1544e-05	166.534	-0.484045	4.4605e-06	168.493	-0.408502	5.57895e-05	160.691	-0.479459	G- coupled receptor 64	0.623		GO:0004930;GO:0007186;GO:0016021;GO:0007166
CGI_10016128	-0.445025	3.65262e-06	2731.53	-0.549974	6.63461e-07	2966.67	-0.445172	2.80119e-06	2789.12	-0.480057	Kielin chordin	0.544		GO:0030414;GO:0010466
CGI_10010334	-0.37885	0.00341294	84.0074	-0.587389	1.01606e-06	95.0774	-0.478477	0.0001169	89.2577	-0.481572	Kyphoscoliosis peptidase [Crassostrea gigas]	0.625		unknown
CGI_10007786	-0.475913	0.000113783	381.85	-0.349636	4.08456e-05	376.52	-0.623629	9.23795e-09	414.471	-0.483059	tctex1 domain-containing 2-like [Lingula anatina]	0.6455		unknown
CGI_10011565	-0.46073	0.013206	1496.33	-0.371117	0.018646	1496.14	-0.618529	0.000532769	1634.22	-0.483459	[Nematostella vectensis]	0.6105		GO:0008270;GO:0016021
CGI_10025659	-0.757294	9.2828e-05	700.413	-0.247674	0.0147609	583.441	-0.445901	0.00438402	621.336	-0.483623	bifunctional -like [Lingula anatina]	0.6565		GO:0003824;GO:0016021;GO:0009058
CGI_10026738	-0.478188	4.13391e-06	159.007	-0.539557	2.22328e-07	169.496	-0.433426	0.000332958	159.323	-0.483724	Tripartite motif-containing 2	0.881		GO:0008270;GO:0005622;GO:0016567
CGI_10005959	-0.431456	0.0277785	283.457	-0.502301	0.00721441	303.343	-0.517716	0.00436087	299.851	-0.483824	alpha-crystallin B chain-like [Limulus polyphemus]	0.6665		GO:0043229;GO:0006464;GO:0044422;GO:0044444;GO:0031323
CGI_10005171	-0.462042	0.0394767	28091.3	-0.442521	0.0337031	28905.8	-0.547598	0.010899	29738.5	-0.484053	mucin-2-like isoform X7	0.761		unknown
CGI_10005556	-0.29309	0.00379615	324.489	-0.24939	0.00830935	331.401	-0.910124	2.85644e-34	429.578	-0.484202	Tripartite motif-containing 2	0.928		GO:0003677;GO:0004820;GO:0005524;GO:0008270;GO:0006426;GO:0003713;GO:0005737;GO:0006355;GO:0016567
CGI_10007097	-0.52817	0.000649184	83.643	-0.42873	0.00577916	83.5571	-0.496911	0.000659364	84.315	-0.484603	dopamine receptor 1-like [Octopus bimaculoides]	0.5095		GO:0004930;GO:0007186;GO:0016021
CGI_10023717	-0.451386	3.56614e-08	50390.2	-0.481529	4.46529e-07	53035.9	-0.524468	4.62739e-12	52990.8	-0.485794	Collagen alpha-5(VI) chain	0.626		GO:0005581
CGI_10016066	-0.413509	4.05111e-06	225.569	-0.578909	7.25738e-11	250.678	-0.470638	3.47633e-06	235.996	-0.487685	VPRBP-like isoform X2	0.6135		unknown
CGI_10003570	-0.704131	1.19664e-05	11811.6	-0.357663	0.0413778	10595.9	-0.404589	0.0157746	10606.8	-0.488794	mucin-2-like isoform X11	0.6315		unknown
CGI_10020232	-0.55902	2.7488e-09	883.321	-0.597211	1.70831e-09	933.336	-0.310203	0.000656754	815.692	-0.488812	Collagen alpha-6(VI) chain	0.5715		GO:0005581
CGI_10025361	-0.680703	6.4233e-14	372.042	-0.309041	0.000444904	331.896	-0.477891	3.70769e-06	348.733	-0.489211	arrestin domain-containing 3-like	0.719		unknown
CGI_10003073	-0.640252	2.73264e-12	707.316	-0.271242	0.0266525	633.291	-0.561232	1.22107e-09	698.439	-0.490909	BTB POZ domain-containing 6	0.98		GO:0016021
CGI_10008279	-0.454674	0.0099953	75.1856	-0.368715	0.0163485	75.3532	-0.652221	3.1045e-05	83.4291	-0.49187	Cytochrome P450 4V2	0.8435		GO:0005506;GO:0016705;GO:0016020;GO:0055114;GO:0004497;GO:0020037
CGI_10016086	-0.309786	1.59828e-05	733.183	-0.289447	0.00325932	756.576	-0.876833	2.35443e-30	950.09	-0.492022	probable proline dehydrogenase 2	0.683		GO:0004657;GO:0055114;GO:0006562
CGI_10028256	-0.429296	0.0100232	462.471	-0.389932	0.00117655	471.956	-0.660394	2.37198e-06	519.969	-0.493207	hypothetical protein CGI_10028256	1		unknown
CGI_10027174	-0.447552	0.000164718	140.986	-0.406278	0.00165737	144.21	-0.632665	4.50137e-08	155.631	-0.495499	shisa-4-like [Crassostrea gigas]	1		GO:0016021
CGI_10027898	-0.382371	0.026817	445.01	-0.697774	2.99843e-06	528.015	-0.41269	0.0015309	458.901	-0.497612	15-hydroxyprostaglandin dehydrogenase [NAD(+)]-like [Crassostrea gigas]	0.674		GO:0016491;GO:0055114
CGI_10027839	-0.357354	0.00582916	205.105	-0.369387	0.0137107	214.334	-0.771615	1.0058e-12	248.923	-0.499452	arylsulfatase B-like	0.7195		GO:0008484;GO:0008152
CGI_10015999	-0.629572	0.00249642	107.591	-0.540224	6.37833e-05	106.805	-0.330182	0.0289209	96.252	-0.499993	Tripartite motif-containing 3	0.863		GO:0008270;GO:0071203;GO:0016567
CGI_10019540	-0.49521	0.000370292	97.0439	-0.456628	0.000409838	99.1474	-0.549107	0.000102211	101.227	-0.500315	F-box LRR-repeat 4	0.7135		unknown
CGI_10023642	-0.430951	0.000175395	182.044	-0.771806	4.49433e-08	219.169	-0.307263	0.0100539	176.934	-0.50334	natural resistance-associated macrophage 2-like [Crassostrea gigas]	0.784		GO:0016021;GO:0006810;GO:0005215
CGI_10009038	-0.640037	3.08938e-05	91.4147	-0.483557	0.00204198	88.9563	-0.3888	0.0187551	84.0208	-0.504131	solute carrier family 28 member 3-like	0.742		GO:0005415;GO:0005887;GO:1901642
CGI_10001572	-0.31425	1.47695e-05	18028	-0.428077	4.25536e-12	19588.5	-0.773528	2.9537e-54	22236.9	-0.505285	[Nematostella vectensis]	0.5955		GO:0005509
CGI_10015904	-0.423939	1.84124e-05	433.572	-0.485543	2.03739e-06	462.3	-0.608757	6.13001e-13	477.634	-0.50608	inosine-uridine preferring nucleoside hydrolase-like	0.6675		GO:0008152;GO:0016787
CGI_10024426	-0.584536	1.10381e-12	1914.54	-0.506633	5.66919e-10	1926.29	-0.42727	4.92297e-14	1830.43	-0.506146	hypothetical protein CGI_10024426	0.7		GO:0005509
CGI_10028299	-0.263104	0.000613162	431.387	-0.59667	6.2214e-12	513.086	-0.65931	5.72609e-23	516.906	-0.506361	flavin reductase (NADPH)-like [Lingula anatina]	0.6695		unknown
CGI_10025998	-0.319929	0.0170058	112.147	-0.604902	1.36758e-07	130.9	-0.599931	3.07953e-07	128.365	-0.508254	neuronal acetylcholine receptor subunit alpha-3-like [Crassostrea gigas]	0.5925		GO:0007154;GO:0034220;GO:0016021;GO:0005230;GO:0044700
CGI_10015948	-0.535337	0.00456942	147.727	-0.642295	2.37519e-05	160.198	-0.349602	0.0236123	139.31	-0.509078	Werner syndrome ATP-dependent helicase	0.714		GO:0016021
CGI_10023323	-0.511873	0.000381825	219.921	-0.558288	0.000222915	233.228	-0.462332	0.016695	220.549	-0.510831	white isoform X1 [Polistes dominula]	0.634		GO:0016887;GO:0005524;GO:0008152;GO:0016021
CGI_10008275	-0.552442	0.000145612	345.899	-0.417738	8.38351e-05	339.22	-0.567085	2.28009e-06	354.588	-0.512422	l-rhamnonate dehydratase	0.814		GO:0009063;GO:0003824
CGI_10017980	-0.481473	2.71618e-07	10457.7	-0.431561	0.000185506	10659.4	-0.627825	3.64501e-15	11342.2	-0.513619	Carboxypeptidase B	0.6455		GO:0008270;GO:0004181;GO:0006508
CGI_10012446	-0.39375	0.0268427	69.7754	-0.593343	0.00011306	78.895	-0.56076	0.000219792	76.4628	-0.515951	Tripartite motif-containing 3	0.4795		GO:0016020;GO:0005044;GO:0006898;GO:0016567
CGI_10026320	-0.610527	1.73146e-15	2166.23	-0.485982	5.612e-09	2138.4	-0.451581	4.07375e-11	2070.59	-0.51603	cysteine- acidic integral membrane -like	0.5305		unknown
CGI_10004995	-0.445221	0.000353633	292.782	-0.610419	4.25415e-09	325.585	-0.494868	0.000108522	304.952	-0.516836	PREDICTED: uncharacterized protein LOC105343466 isoform X2	0.69		unknown
CGI_10003288	-0.51131	1.42745e-08	1010.6	-0.587026	3.95413e-12	1083.5	-0.452782	9.99917e-12	1006.35	-0.517039	Collagen alpha-1(XII) chain	0.592		GO:0005581
CGI_10008455	-0.547586	0.000615142	49156.3	-0.458282	0.00530259	49194.1	-0.551006	0.00150356	50303.2	-0.518958	Collagen alpha-4(VI) chain	0.61		GO:0005581
CGI_10022637	-0.546482	0.000141975	564.487	-0.348984	0.00138554	539.767	-0.66392	1.69724e-16	603.222	-0.519795	[Nematostella vectensis]	0.6625		GO:0008063
CGI_10003871	-0.47863	1.11097e-08	535.291	-0.524492	1.19463e-10	566.502	-0.558657	4.22589e-08	565.174	-0.520593	FAM134C isoform X2	0.54		GO:0016021
CGI_10004778	-0.580349	4.53057e-06	280.499	-0.493323	1.53369e-06	280.831	-0.488942	7.70228e-09	275.079	-0.520871	Zinc finger ubi-d4	0.7863		unknown
CGI_10024460	-0.539844	2.41516e-06	344.756	-0.421351	0.00454506	341.829	-0.60146	0.00507524	364.833	-0.520885	multiple epidermal growth factor-like domains 10	0.603		GO:0016020;GO:0016310;GO:0016301
CGI_10014748	-0.501332	0.000432298	89.9649	-0.735703	4.01443e-07	103.558	-0.327886	0.0248138	85.5617	-0.52164	BTB POZ domain-containing 3 isoform X2	0.5945		unknown
CGI_10002621	-0.63781	0.00506534	62.388	-0.45264	0.0401867	59.5898	-0.475058	0.0263315	59.063	-0.521836	multiple epidermal growth factor-like domains 10	0.861		GO:0004725;GO:0016021;GO:0035335
CGI_10007238	-0.507384	8.85449e-09	227.87	-0.671653	2.36752e-14	253.615	-0.39702	0.000123594	222.409	-0.525352	THO complex subunit 5 homolog isoform X1	0.764		GO:0006406;GO:0050794;GO:0000347;GO:0000346;GO:0009987
CGI_10013428	-0.385749	0.0282827	46.209	-0.727106	7.09107e-06	55.6127	-0.463291	0.0103913	48.7211	-0.525382	Polypeptide N-acetylgalactosaminyltransferase 5	0.751		GO:0016021;GO:0018243;GO:0000139;GO:0030246;GO:0004653
CGI_10002108	-0.521585	1.2065e-10	789.249	-0.562305	5.7347e-13	834.356	-0.493009	1.41567e-09	796.405	-0.525633	iron zinc purple acid phosphatase [Crassostrea gigas]	0.584		GO:0046872;GO:0016021;GO:0016311;GO:0003993
CGI_10017675	-0.518531	1.02446e-05	2936.84	-0.641851	5.68136e-08	3216.48	-0.426388	6.66488e-05	2885.74	-0.528924	hypothetical protein CGI_10017675	0.8229		GO:0016020
CGI_10003698	-0.355679	0.0213908	86.4152	-0.622483	7.56277e-06	100.266	-0.610431	9.73149e-06	98.0889	-0.529531	4-hydroxy-2-oxoglutarate mitochondrial-like [Aplysia californica]	0.775		GO:0008152;GO:0016829
CGI_10026678	-0.359919	0.00498078	558.105	-0.65347	2.74219e-06	656.26	-0.580133	1.78008e-05	624.276	-0.531174	MAM and LDL-receptor class A domain-containing 1-like	0.5885		GO:0016020
CGI_10007560	-0.656604	4.7953e-10	1106.88	-0.425318	2.67538e-05	1044.05	-0.512149	1.41873e-06	1062.58	-0.531357	pyruvate kinase PKM isoform X2	0.6855		GO:0000287;GO:0004743;GO:0030955;GO:0006096;GO:0031982;GO:0044424;GO:0016301
CGI_10026000	-0.726439	1.15999e-07	5819.47	-0.435265	0.00130954	5338.23	-0.432472	0.000930985	5237.31	-0.531392	Collagen alpha-6(VI) chain	0.609		GO:0005581
CGI_10005096	-0.683291	2.74456e-08	3042.63	-0.628434	2.09647e-06	3089.73	-0.287286	0.0237119	2637.27	-0.533004	probable serine threonine- kinase DDB_G0282963 isoform X3	1		GO:0030414;GO:0005576;GO:0010466
CGI_10009998	-0.383406	0.00298447	687.64	-0.330016	0.00586408	699.312	-0.887211	2.23645e-15	871.202	-0.533544	von Willebrand factor A domain-containing 7-like	0.545		unknown
CGI_10026285	-0.363646	9.08518e-07	5459.54	-0.462771	3.31004e-13	5900.75	-0.779849	2.57501e-40	6626.63	-0.535422	UDP-glucuronic acid decarboxylase 1-like isoform X2 [Crassostrea gigas]	0.8165		GO:0070085;GO:0016757;GO:0050662;GO:0016020;GO:0005794;GO:0016853
CGI_10025512	-0.479902	5.20377e-08	230.685	-0.489379	5.97598e-08	240.985	-0.638994	4.45114e-13	252.043	-0.536092	hypothetical protein CGI_10025512	0.6386		unknown
CGI_10020612	-0.617195	8.58868e-08	735.892	-0.683788	1.52186e-10	786.195	-0.309602	0.0434861	662.805	-0.536862	hypothetical protein CGI_10020612	1		unknown
CGI_10007686	-0.543044	1.66352e-06	182.598	-0.325585	0.00676533	173.795	-0.744865	1.32063e-12	203.303	-0.537831	F-box WD repeat-containing 5-like	0.7605		GO:0005509;GO:0016021
CGI_10005856	-0.529118	6.59511e-05	575.14	-0.582402	8.35822e-06	611.371	-0.507273	3.39906e-05	581.621	-0.539598	chitin synthase	0.6425		GO:0016758;GO:0008152;GO:0016021
CGI_10027801	-0.677421	3.04014e-07	128.134	-0.305547	0.0384644	114.354	-0.637611	1.65811e-05	128.824	-0.540193	Tripartite motif-containing 2	0.8875		GO:0008270;GO:0016021;GO:0005622;GO:0016567
CGI_10024538	-0.368591	0.0137419	877.503	-0.886058	3.65439e-07	1147.03	-0.374869	1.69082e-05	895.958	-0.543173	coadhesin-like isoform X2	0.6405		unknown
CGI_10009194	-0.390222	0.0166378	82.8291	-0.680501	8.46152e-05	97.6966	-0.560617	0.000205891	90.6891	-0.54378	Collagen alpha-4(VI) chain	0.6995		GO:0008061;GO:0005581;GO:0006030;GO:0005576
CGI_10015866	-0.894558	3.94391e-13	188.252	-0.33931	0.049057	154.64	-0.39829	0.0026184	155.181	-0.544053	[Nematostella vectensis]	0.554		GO:0008270
CGI_10013422	-0.53163	0.000133413	132.569	-0.54008	7.17167e-05	138.148	-0.566445	3.45897e-05	137.339	-0.546052	calmodulin-like isoform X3	1		unknown
CGI_10006105	-0.700435	1.373e-07	2340.63	-0.417735	0.00067009	2156.21	-0.524953	7.50642e-06	2213.22	-0.547708	Collagen alpha-4(VI) chain	0.642		unknown
CGI_10007909	-0.513189	0.000899062	452.879	-0.622203	2.27164e-07	491.65	-0.511497	0.00135803	461.851	-0.548963	erythroid differentiation-related factor 1 isoform X3	0.5995		unknown
CGI_10019267	-0.458401	0.00252804	373.204	-0.431124	0.000600753	382.755	-0.7612	3.74185e-09	433.103	-0.550242	calcyphosin isoform X1 [Crassostrea gigas]	0.7605		GO:0005509
CGI_10005941	-0.33994	0.00431153	164.437	-0.60338	3.49842e-11	190.455	-0.708871	1.69751e-13	195.603	-0.55073	Tripartite motif-containing 2	0.869		GO:0008270;GO:0005622;GO:0016567
CGI_10019974	-0.533033	3.57065e-11	413.053	-0.501769	2.04458e-10	423.669	-0.6178	2.86539e-15	436.847	-0.550867	alpha-mannosidase 2 isoform X3	0.719		GO:0048731;GO:0048015;GO:0006013;GO:0046854;GO:0015923;GO:0016773;GO:0030246;GO:0016301;GO:0005622;GO:0043227
CGI_10025241	-0.690702	5.78327e-29	691.209	-0.518645	1.44591e-07	669.354	-0.446864	1.26578e-10	637.968	-0.552071	fibrillin-2-like [Crassostrea gigas]	0.6815		GO:0008177;GO:0050660;GO:0006099;GO:0022900;GO:0005743
CGI_10027341	-0.424691	0.043685	477.249	-0.514049	0.00374156	513.738	-0.720505	2.45282e-11	548.663	-0.553082	gamma-glutamyltranspeptidase 1-like	0.6135		GO:0006749;GO:0016021;GO:0003840
CGI_10003646	-0.602069	1.83543e-07	920.465	-0.76912	1.26331e-14	1027.53	-0.288113	0.00197756	826.416	-0.553101	hypothetical protein CGI_10003646	1		GO:0016021
CGI_10018583	-0.555885	6.61079e-07	1055.82	-0.735796	5.61975e-07	1190.14	-0.368853	0.000789236	998.678	-0.553511	peroxidasin homolog	0.538		GO:0016021;GO:0044699;GO:0032501
CGI_10010230	-0.44428	0.0341318	67.8373	-0.617992	5.67919e-05	75.6567	-0.603085	0.00040801	73.8775	-0.555119	methyltransferase 7A	0.59		GO:0016021;GO:0008168;GO:0032259
CGI_10026992	-0.409984	1.02446e-05	523.9	-0.698946	1.9415e-18	613.81	-0.556954	8.62899e-08	568.299	-0.555295	proline-rich 2-like	0.632		GO:0016021
CGI_10008481	-0.547464	7.07708e-07	215.395	-0.45965	1.89021e-06	215.557	-0.660274	5.01868e-11	230.324	-0.555796	PREDICTED: uncharacterized protein LOC105332663 isoform X1	0.6545		GO:0007165
CGI_10025024	-0.575905	4.88924e-06	268.463	-0.708894	1.73158e-09	295.263	-0.382641	0.00730478	253.04	-0.555814	Mpv17-like [Crassostrea gigas]	0.5545		GO:0016021
CGI_10013888	-0.467177	0.00452435	461.5	-0.635907	5.70817e-07	514.067	-0.56574	1.16366e-05	490.057	-0.556275	peptidylglycine alpha-hydroxylating monooxygenase	0.6694		GO:0005507;GO:0016715;GO:0055114
CGI_10024944	-0.6271	3.94517e-09	908.432	-0.576096	5.37733e-09	923.467	-0.466079	3.73022e-08	865.994	-0.556425	dynein heavy chain axonemal-like	0.9125		GO:0016887;GO:0005524;GO:0003777;GO:0008152;GO:0030286;GO:0007018
CGI_10011290	-0.628235	0.000106638	2292.03	-0.733608	4.70412e-11	2482.3	-0.308605	0.026187	2045.11	-0.556816	Uncharacterized protein C18H10.09	0.563		GO:0008270
CGI_10009505	-0.420929	0.0297464	60.8704	-0.696795	0.000501455	71.5137	-0.555106	0.00149591	65.6976	-0.55761	FK506-binding 2-like	0.5535		unknown
CGI_10007643	-0.597102	0.000502249	928.589	-0.535568	0.00139207	938.991	-0.542806	7.77719e-07	921.56	-0.558492	S-adenosylmethionine synthase isoform type-2	0.8995		GO:0005524;GO:0048269;GO:0046872;GO:0005829;GO:0006556;GO:0004478;GO:0006730
CGI_10005397	-0.714085	0.000346772	3122.96	-0.423031	0.0243443	2850.99	-0.542377	0.00150171	2942.2	-0.559831	temptin-like	0.6975		GO:0003824;GO:0016020
CGI_10008979	-0.572439	1.38906e-05	4605.31	-0.630211	1.30497e-08	4898.28	-0.477983	9.69762e-06	4513.32	-0.560211	hypothetical protein CGI_10008979	0.6227		GO:0005509
CGI_10010059	-0.320942	0.0484463	216.33	-0.784093	8.58918e-09	273.299	-0.575669	5.53016e-05	245.239	-0.560235	inter-alpha-trypsin inhibitor heavy chain H3-like	0.7325		GO:0004867;GO:0010951;GO:0030212;GO:0044765
CGI_10011966	-0.598712	7.49042e-08	194.158	-0.50827	1.29787e-05	194.272	-0.582831	8.41251e-07	196.728	-0.563271	Tripartite motif-containing 2	0.8705		GO:0008270;GO:0005622;GO:0016567
CGI_10027779	-0.500027	1.56774e-05	1798.75	-0.762019	1.42121e-15	2088.75	-0.431151	7.48916e-06	1783.73	-0.564399	ovomucoid-like [Crassostrea gigas]	0.5006		unknown
CGI_10025999	-0.710512	8.3169e-17	1099.95	-0.592061	1.06867e-13	1086.27	-0.402365	5.95275e-05	987.911	-0.568313	mucin-2-like isoform X1	0.576		unknown
CGI_10026965	-0.619565	0.00286797	74.1927	-0.595119	0.000114898	75.72	-0.501374	0.00120837	71.5153	-0.57202	PREDICTED: uncharacterized protein LOC105327651	0.5795		unknown
CGI_10026834	-0.662417	3.9622e-05	65.774	-0.464551	0.00174327	62.5638	-0.598171	0.000869895	65.1416	-0.575046	glucosyltransferase [Yersinia aldovae]	0.586		GO:0008152;GO:0016021;GO:0016740
CGI_10003406	-0.617641	0.00170626	294.861	-0.399983	0.0148736	278.437	-0.709178	2.41756e-06	311.838	-0.575601	uncharacterized serine-rich -like [Crassostrea gigas]	0.98		GO:0016021
CGI_10013180	-0.747731	6.00728e-06	47.1208	-0.559185	0.0474505	45.7513	-0.420562	0.044328	41.9442	-0.575826	toll	0.5095		GO:0008063
CGI_10022792	-0.418616	9.16653e-06	1634.53	-0.55791	1.97181e-08	1799.12	-0.751118	5.25474e-15	1920.24	-0.575881	dynein heavy chain axonemal-like	0.8145		GO:0016887;GO:0005524;GO:0003777;GO:0008152;GO:0030286;GO:0007018
CGI_10013536	-0.814097	8.24942e-16	363.952	-0.388599	0.000376441	315.643	-0.525346	7.47037e-08	327.805	-0.576014	probable thiopurine S-methyltransferase	0.719		GO:0006508;GO:0004252;GO:0008757;GO:0032259
CGI_10015017	-0.786576	1.69279e-14	137.992	-0.366901	0.00286067	120.349	-0.576051	7.08953e-08	128.48	-0.576509	hypothetical protein CGI_10015017	1		unknown
CGI_10014512	-0.476134	0.00300667	60.7356	-0.598951	3.17905e-05	66.4586	-0.656626	1.22543e-05	66.9327	-0.577237	SPEC3 [Crassostrea gigas]	0.6325		GO:0046872;GO:0016021
CGI_10004429	-0.435824	0.00696321	346.507	-0.785891	9.05814e-05	421.749	-0.512698	0.00110943	364.98	-0.578138	Crt-like 1	0.5615		GO:0016021
CGI_10003320	-0.455813	0.016014	50.6801	-0.802449	1.39496e-05	61.3619	-0.477038	0.00604194	52.0951	-0.578433	hypothetical protein CGI_10003320	0.945		unknown
CGI_10023694	-0.6687	9.43104e-13	480.924	-0.474537	1.07455e-07	460.785	-0.600967	3.96286e-16	476.839	-0.581401	hypothetical protein CGI_10023694	0.6075		unknown
CGI_10020956	-0.569287	0.000335561	453.665	-0.665101	3.32237e-08	490.003	-0.511218	5.80823e-05	450.911	-0.581869	endothelin-converting enzyme 1-like	0.6265		GO:0065007;GO:0006518;GO:0006508;GO:0016021;GO:0044444;GO:0004222;GO:0043227;GO:0032501
CGI_10009810	-0.630451	0.00198133	47.927	-0.676402	0.00094342	50.7592	-0.439244	0.0326408	44.8971	-0.582032	gamma-glutamyltranspeptidase 3-like	0.7		GO:0006749;GO:0003840
CGI_10003347	-0.586973	0.000225356	81.9642	-0.803419	5.54678e-09	93.5017	-0.371995	0.0213765	76.5828	-0.587462	SCO-spondin-like	0.63		GO:0016021
CGI_10000194	-0.611673	1.39189e-17	7725.78	-0.609905	8.6728e-15	8024.89	-0.541891	3.36321e-14	7660.29	-0.587823	60S ribosomal partial	0.8845		GO:0003735;GO:0022625;GO:0006412
CGI_10013099	-0.631485	0.000157653	73.0208	-0.560722	0.00186202	73.545	-0.575324	0.000380349	72.7259	-0.589177	Histone deacetylase 8	0.7815		GO:0031072;GO:0019219;GO:0065008;GO:0060255;GO:0004407;GO:0033044;GO:0016575;GO:0044424
CGI_10008026	-0.501362	1.71214e-12	1073.15	-0.671797	4.57694e-16	1198.69	-0.59844	7.38293e-11	1141.9	-0.590533	hypothetical protein CGI_10008026	0.4795		GO:0016021
CGI_10002322	-0.833146	9.69109e-05	149.643	-0.33051	0.0241139	123.883	-0.608199	7.18843e-06	136.473	-0.590618	receptor-type tyrosine- phosphatase S-like	0.6845		GO:0006470;GO:0016791
CGI_10017419	-0.482232	0.000247656	473.987	-0.536791	0.000224474	504.6	-0.754521	2.8215e-12	543.196	-0.591181	ITFG3-like isoform X1 [Biomphalaria glabrata]	0.5685		GO:0016021
CGI_10021913	-0.435467	0.000457173	153.936	-0.782052	1.75527e-11	185.735	-0.559025	1.6878e-05	165.731	-0.592181	ankyrin-3 isoform X23	0.538		GO:0007009;GO:0008104;GO:0044464
CGI_10028934	-0.572873	0.000662346	1068.68	-0.4589	0.0360084	1061.89	-0.75199	4.8685e-06	1180.48	-0.594588	A disintegrin and metallo ase with thrombospondin motifs 13 isoform X1	0.5505		GO:0008270;GO:0007229;GO:0006508;GO:0004222;GO:0005578
CGI_10009646	-0.467063	2.90292e-07	365.433	-0.662567	4.76098e-09	412.99	-0.654391	5.07479e-21	403.121	-0.594674	Regulator of G- signaling 3	0.732		GO:0035023;GO:0005089;GO:0043547
CGI_10021865	-0.413916	0.00697495	144.18	-0.851357	1.54567e-14	180.381	-0.522488	0.00026962	153.748	-0.595921	hypothetical protein CGI_10021865	0.985		unknown
CGI_10004946	-0.573718	2.05448e-11	386.54	-0.827398	2.18139e-18	449.052	-0.38722	2.03941e-07	365.395	-0.596112	sortilin-related receptor isoform X2	0.6755		GO:0006605;GO:0005768;GO:0043086;GO:1902992;GO:1903651;GO:0005794;GO:0033365;GO:0060627;GO:0005488;GO:0051338;GO:0044446;GO:0032269
CGI_10001761	-0.624941	0.000222676	72.6134	-0.753582	0.000217266	80.337	-0.409856	0.0176165	67.6479	-0.596126	hypothetical protein CGI_10001761	0.8085		unknown
CGI_10022895	-0.840185	2.61294e-07	12579.5	-0.668994	0.000945659	12146	-0.282419	0.0496392	10094.2	-0.597199	PREDICTED: uncharacterized protein LOC105340547 [Crassostrea gigas]	0.5825		unknown
CGI_10013895	-0.600279	5.65847e-06	169.418	-0.283813	0.0378244	154.786	-0.910443	4.47565e-18	198.05	-0.598178	retinol dehydrogenase 12-like	0.6875		GO:0016491;GO:0055114
CGI_10015178	-0.498634	0.0110456	45.9308	-0.649733	0.000612901	51.081	-0.648411	0.000481192	50.0711	-0.598926	Tripartite motif-containing 2	0.489		GO:0008270;GO:0005622;GO:0016567
CGI_10010819	-0.593649	1.9916e-10	259.755	-0.670676	9.63066e-09	279.38	-0.538413	2.23903e-09	258.981	-0.600913	hypothetical protein CGI_10010819	0.9367		unknown
CGI_10013139	-0.569558	3.76066e-06	145.786	-0.600974	2.51737e-08	153.348	-0.633809	1.13927e-07	153.073	-0.601447	telomeric repeat-binding factor 2-interacting 1 [Cynoglossus semilaevis]	0.6344		unknown
CGI_10021510	-0.668818	2.68523e-05	63.0221	-0.762156	3.0856e-05	68.586	-0.373926	0.0466273	56.9451	-0.601633	Sodium-dependent phosphate transport 2B	0.711		GO:0005315;GO:0005436;GO:0015321;GO:0005737;GO:0044341;GO:0016021;GO:0035725;GO:0005886;GO:0035435;GO:0030643
CGI_10006591	-0.382175	0.0209368	120.326	-0.771162	1.88484e-09	147.164	-0.658286	2.83097e-05	138.014	-0.603874	leucine-rich repeat-containing 74A	0.6155		GO:0008063
CGI_10007674	-0.886767	2.25886e-08	453.323	-0.400759	0.0213364	380.746	-0.525498	0.00179603	393.956	-0.604341	cytochrome P450	0.631		GO:0005506;GO:0016705;GO:0055114;GO:0004497;GO:0020037
CGI_10003369	-0.655271	8.51827e-15	807.066	-0.345762	0.000215119	738.79	-0.812045	1.02606e-16	883.33	-0.60436	ammonium transporter Rh type B-like	0.7265		GO:0008519;GO:0005887;GO:0015695;GO:0072488;GO:0019740
CGI_10010669	-0.502598	0.012809	36.7065	-0.804006	5.44167e-06	43.5186	-0.509536	0.0138811	37.6847	-0.60538	hypothetical protein CGI_10010669	0.6525		unknown
CGI_10023819	-0.621041	9.43011e-07	154.914	-0.581014	3.99695e-07	158.15	-0.616827	4.56621e-07	157.783	-0.606294	galactoside 2-alpha-L-fucosyltransferase 2-like [Crassostrea gigas]	0.587		GO:0036065;GO:0016021;GO:0008107
CGI_10009013	-0.504849	0.00219114	2014.14	-0.705439	5.32158e-08	2275.34	-0.612469	0.000111278	2151.48	-0.607586	CREBRF homolog [Halyomorpha halys]	0.752		GO:0003700;GO:0006355;GO:0043565
CGI_10014974	-0.677694	0.000180904	58.0794	-0.570702	0.00048631	57.4616	-0.579394	0.00110765	56.6071	-0.609264	guanine nucleotide-binding G(s) subunit alpha [Papilio machaon]	0.723		GO:0005525;GO:0007186;GO:0007264;GO:0003924;GO:0008152;GO:0031683;GO:0004871;GO:0005622
CGI_10019537	-1.07565	1.69449e-16	266.372	-0.331699	0.0161955	199.255	-0.424118	0.00190849	203.269	-0.610488	F-box LRR-repeat 4	0.7475		GO:0004842;GO:0008270;GO:0016021;GO:0016829;GO:0006520;GO:0016874;GO:0016567
CGI_10009815	-0.60643	8.34584e-05	98.5522	-0.55239	0.000280428	100.067	-0.673996	1.63949e-08	103.12	-0.610939	rRNA methyltransferase mitochondrial	0.6825		GO:0001510;GO:0008168
CGI_10021249	-0.900195	1.52254e-14	212.651	-0.39073	0.0186272	177.48	-0.548843	7.8218e-05	185.909	-0.613256	S-methyl-5-thioribose kinase [Bacillus methanolicus]	0.5955		GO:0016310;GO:0016301
CGI_10018896	-0.468946	0.0323176	69.0271	-0.426793	0.0317159	70.2547	-0.944337	2.59131e-07	87.1107	-0.613359	Tripartite motif-containing 3	0.9005		GO:0008270;GO:0005622;GO:0016567
CGI_10018100	-0.503855	1.28393e-05	2113.61	-0.845139	1.02843e-15	2545.72	-0.49215	2.50694e-05	2147.6	-0.613715	ribonuclease Oy-like	0.567		GO:0090502;GO:0003723;GO:0033897
CGI_10026018	-0.643117	0.000353389	52.1178	-0.464042	0.010974	50.05	-0.736488	1.73235e-06	55.2695	-0.614549	Selenocysteine lyase	0.644		GO:0016021
CGI_10022252	-0.437987	0.00202359	74.2303	-0.770476	5.73923e-09	88.9746	-0.638769	1.30998e-06	82.3138	-0.615744	von Willebrand factor type EGF and pentraxin domain-containing 1-like	0.5355		GO:0016021;GO:0005488
CGI_10002192	-0.851627	5.91619e-12	285.642	-0.602065	1.86906e-06	265.788	-0.397796	0.00378025	240.064	-0.617163	insulin-like growth factor-binding complex acid labile subunit	1		unknown
CGI_10013887	-0.701778	0.00159222	1386.37	-0.509093	0.00620807	1315.59	-0.645411	0.000307512	1370.62	-0.618761	Peptidylglycine alpha-hydroxylating monooxygenase	0.6085		GO:0005507;GO:0016715;GO:0055114
CGI_10003551	-0.695211	0.00612393	38.2352	-0.514888	0.00918345	36.4111	-0.646757	0.00169093	37.9249	-0.618952	popeye domain-containing 3-like	0.6815		GO:0016021
CGI_10013484	-0.459256	0.00573874	65.1999	-0.91143	5.86784e-09	82.7699	-0.492683	0.00153688	67.4859	-0.621123	Tripartite motif-containing 3	0.5615		GO:0008270;GO:0005622;GO:0016567
CGI_10014816	-0.796393	4.81461e-05	68.4085	-0.433839	0.0266641	60.4496	-0.634796	0.00175739	64.7034	-0.621676	Histone-lysine N-methyltransferase PRDM9	0.5935		GO:0008168;GO:0032259
CGI_10024441	-0.731967	3.44538e-07	166.271	-0.59617	6.87546e-06	162.478	-0.542082	1.60549e-05	155.929	-0.623406	Kelch 28 [Crassostrea gigas]	0.642		GO:0006508;GO:0004252
CGI_10008341	-0.415797	5.86642e-09	7319.86	-0.872802	3.66875e-17	9267.89	-0.582973	4.05904e-14	8004.13	-0.623857	beta-1,3-glucan-binding -like	0.6815		GO:0005975;GO:0004553;GO:0030246;GO:0002221
CGI_10014237	-0.549546	7.75919e-05	175.11	-0.71254	3.02203e-06	195.737	-0.609719	8.67016e-05	183.753	-0.623935	alpha-(1,3)-fucosyltransferase C-like isoform X1 [Cephus cinctus]	0.571		GO:0008417;GO:0032580;GO:0036065;GO:0016021;GO:0006486
CGI_10008456	-0.785984	5.05577e-08	33939	-0.51028	9.21333e-05	31228.4	-0.576823	5.19419e-06	31543.7	-0.624362	Collagen alpha-4(VI) chain	0.5715		unknown
CGI_10017124	-0.732196	0.00369807	168.333	-0.651633	0.000475096	166.546	-0.493035	0.00596915	152.48	-0.625621	betaine--homocysteine S-methyltransferase 1-like	0.6975		GO:0016740
CGI_10009151	-0.438026	0.000769914	185.39	-0.660197	3.07181e-08	211.451	-0.78043	9.99923e-12	219.014	-0.626218	PREDICTED: uncharacterized protein LOC105327447	0.95		GO:0042981
CGI_10028500	-0.407616	0.00866766	269.426	-0.374739	0.00529278	275.946	-1.10927	9.14208e-15	376.926	-0.630541	FAD-linked oxidoreductase DDB_G0289697-like [Crassostrea gigas]	0.521		GO:0016614;GO:0050660;GO:0055114
CGI_10025213	-0.590457	0.00231043	55.6724	-0.511118	0.00294615	55.8953	-0.792433	4.03861e-06	62.016	-0.631336	[Nematostella vectensis]	0.5065		unknown
CGI_10024873	-0.58394	0.00152156	1249.11	-0.573576	1.53729e-06	1285.42	-0.742628	4.61532e-11	1358.08	-0.633382	chymotrypsin-like protease CTRL-1 isoform X2	0.828		unknown
CGI_10019222	-0.453531	0.00621997	123.963	-0.762943	5.71234e-05	148.214	-0.68525	9.41627e-08	139.667	-0.633908	hypothetical protein CGI_10019222	0.6995		GO:0005525;GO:0016021
CGI_10020129	-0.700761	0.00437727	191.896	-0.678332	0.000441552	195.482	-0.532044	0.036353	181.262	-0.637046	glycine-rich domain-containing 2-like [Biomphalaria glabrata]	0.66		unknown
CGI_10002214	-0.717257	0.000159718	127.073	-0.292763	0.0285252	109.93	-0.907466	6.17418e-11	140.641	-0.639162	hypothetical protein CGI_10002214	0.6217		GO:0044699
CGI_10006259	-0.574124	0.00184824	75.454	-0.728284	1.87971e-06	83.7962	-0.618515	1.36401e-05	78.2823	-0.640308	hypothetical protein CGI_10006259	1		GO:0016021
CGI_10007993	-0.743378	1.32459e-16	1200.76	-0.960256	2.83113e-33	1374.53	-0.229337	0.00744463	992.808	-0.644324	c-binding -like	0.835		GO:0005216;GO:0034220;GO:0016021
CGI_10022791	-0.322208	0.0138002	973.566	-0.892617	2.14715e-14	1290.64	-0.718796	1.79931e-12	1170.88	-0.64454	dynein heavy chain axonemal-like	0.8435		GO:0016887;GO:0005524;GO:0003777;GO:0008152;GO:0030286;GO:0007018
CGI_10004468	-0.284032	0.00346098	286.532	-0.802483	4.65371e-19	369.402	-0.850156	1.55817e-21	370.964	-0.645557	Tripartite motif-containing 45	0.867		GO:0005524;GO:0008270;GO:0016491;GO:0055114;GO:0005622;GO:0016567
CGI_10020523	-0.667271	0.0104538	81.5432	-0.641982	0.000739509	82.8772	-0.631825	0.00149468	81.0639	-0.647026	multiple epidermal growth factor-like domains 6	0.4545		GO:0009987
CGI_10026434	-0.512938	0.000150498	363.281	-0.681457	4.81772e-10	405.244	-0.761582	1.71092e-25	411.157	-0.651992	[Nematostella vectensis]	0.6275		GO:0016491;GO:0055114
CGI_10012056	-0.410932	1.99035e-06	567.678	-0.848887	9.13623e-19	711.457	-0.699297	2.53688e-17	653.375	-0.653039	regucalcin-like [Crassostrea gigas]	0.7185		GO:0005509;GO:0050790;GO:0030234
CGI_10017902	-0.297443	0.0485406	1293.14	-1.04784	1.74218e-20	1859.37	-0.618136	3.02871e-06	1505.87	-0.654474	serine threonine- kinase ULK4-like	0.7545		GO:0005524;GO:0043408;GO:0004672;GO:0044763;GO:0006468
CGI_10004272	-0.539906	0.000147182	939.474	-0.704883	1.73611e-08	1046.64	-0.719545	6.59909e-10	1034.28	-0.654778	hypothetical protein CGI_10004272	0.811		unknown
CGI_10024835	-0.796273	1.62595e-06	349.694	-0.597389	0.00053328	332.639	-0.577536	4.06175e-06	322.616	-0.657066	F-box only 25 isoform X2	0.5945		unknown
CGI_10028077	-0.568338	0.000403784	1125.53	-1.08508	3.7807e-12	1483.46	-0.331564	0.0291345	1040.69	-0.661659	hypothetical protein CGI_10028077	0.5875		GO:0019028
CGI_10008283	-0.93803	1.1278e-17	150.226	-0.300505	0.0140059	118.995	-0.747236	1.74311e-08	141.073	-0.661924	hypothetical protein CGI_10008283	0.735		GO:0016021
CGI_10001228	-0.593463	0.000821051	100.852	-0.761448	4.39173e-06	112.87	-0.633838	0.000307911	104.769	-0.662916	lanC 3 isoform X3 [Aplysia californica]	0.7375		GO:0003824;GO:0008152;GO:0016021
CGI_10018101	-0.528325	1.04726e-05	457.232	-0.965566	2.3453e-24	575.374	-0.499044	8.34024e-05	461.192	-0.664312	Ribonuclease Oy	0.608		GO:0090502;GO:0003723;GO:0033897
CGI_10024147	-0.544233	6.08365e-05	715.451	-0.653609	2.79239e-07	778.536	-0.797767	1.21524e-06	819.076	-0.665203	hypothetical protein CGI_10024147	0.61		unknown
CGI_10020425	-0.701549	1.85152e-06	1139.09	-0.392736	0.0331361	1039.65	-0.905783	4.62568e-08	1279.83	-0.666689	ATP-binding cassette sub-family A member 1-like [Biomphalaria glabrata]	0.643		GO:0016887;GO:0005524;GO:0008152;GO:0016021;GO:0006810;GO:0005215
CGI_10002782	-0.701219	0.00296602	34.4005	-0.604918	0.0158164	34.2001	-0.696308	0.00578658	35.0904	-0.667482	major facilitator superfamily domain-containing 6-like	0.5355		GO:0016021
CGI_10014496	-0.526304	0.0141687	37.5716	-0.984174	8.87696e-08	48.1705	-0.497701	0.0140532	37.8083	-0.669393	cholecystokinin receptor-like [Crassostrea gigas]	0.5845		GO:0004930;GO:0007186;GO:0016021
CGI_10028188	-0.82452	2.01765e-05	45.3852	-0.713258	3.56417e-05	44.8379	-0.471469	0.0201152	39.7311	-0.669749	HHIP 1	0.607		GO:0005975;GO:0016901;GO:0048038;GO:0055114
CGI_10004966	-0.77039	2.744e-07	825.187	-0.756384	2.16903e-08	850.345	-0.484089	0.000102225	742.008	-0.670288	neurogenic locus Notch -like	0.588		GO:0005509;GO:0016021
CGI_10027635	-0.756168	3.69524e-07	731.323	-0.656347	3.12533e-05	727.189	-0.599697	3.97862e-05	696.138	-0.670737	prostaglandin reductase 1-like	0.7115		GO:0008270;GO:0016491;GO:0055114
CGI_10007143	-0.684652	1.51002e-06	1028.25	-0.846983	3.21718e-13	1145.82	-0.482545	0.000829983	962.147	-0.671393	ovomucoid-like [Octopus bimaculoides]	0.5615		unknown
CGI_10016835	-0.299291	0.00298665	181.308	-0.918819	1.61646e-29	244.727	-0.797531	9.37441e-18	227.864	-0.67188	Tripartite motif-containing 2	0.866		GO:0008270;GO:0005622;GO:0016567
CGI_10014229	-0.598137	0.0430684	20.1045	-0.826281	0.00106613	23.0385	-0.593396	0.0484265	20.4642	-0.672605	Phytanoyl- hydroxylase-interacting	0.647		GO:0008270;GO:0005622
CGI_10028570	-1.0926	8.11934e-17	149.43	-0.653603	9.46319e-09	126.809	-0.28512	0.0350268	107.164	-0.677109	arginine N-methyltransferase 6	0.6705		GO:0034969;GO:0006355;GO:0044424;GO:0008469
CGI_10003444	-0.623222	3.20693e-05	108.97	-0.751288	6.36522e-06	120.207	-0.657231	1.04685e-05	112.996	-0.677247	Tripartite motif-containing 3	0.843		GO:0008270;GO:0006886;GO:0008536;GO:0005622;GO:0016567
CGI_10025362	-0.785785	2.37636e-12	227.894	-0.557436	9.79564e-07	214.523	-0.692691	1.43962e-08	223.549	-0.678638	serine--tRNA mitochondrial-like	0.693		GO:0005524;GO:0005737;GO:0004828;GO:0006434
CGI_10028465	-0.62975	4.098e-08	234.977	-0.270268	0.0297339	211.025	-1.14175	9.5565e-28	302.897	-0.680588	hypothetical protein CGI_10028465	0.8905		GO:0003700;GO:0003824;GO:0009116;GO:0006355
CGI_10018626	-0.544436	0.000324069	129.02	-0.548373	0.00315874	134.6	-0.949662	2.11909e-09	158.218	-0.680824	aquaporin-8-like isoform X3 [Aplysia californica]	0.698		GO:0005887;GO:0006833;GO:0015254;GO:0009992;GO:0015793;GO:0034220;GO:0015250
CGI_10006902	-0.625179	3.67791e-11	761.685	-0.841063	3.16352e-19	870.075	-0.58086	4.32303e-14	762.413	-0.682367	Multiple epidermal growth factor-like domains 10	0.7775		GO:0016021
CGI_10026399	-0.775703	1.42445e-13	401.578	-0.388886	0.00067834	354.567	-0.897323	4.04227e-27	432.339	-0.687304	PREDICTED: uncharacterized protein LOC105321645 [Crassostrea gigas]	0.621		GO:0005576
CGI_10010053	-0.588499	3.2071e-06	1126.6	-0.969455	9.74669e-18	1386.87	-0.504371	8.75368e-11	1107.39	-0.687442	hemicentin-2-like isoform X1 [Crassostrea gigas]	0.472		unknown
CGI_10024719	-0.689471	1.14985e-07	6633.71	-0.789661	5.3711e-11	7200.1	-0.588227	1.68735e-07	6472.73	-0.68912	cysteine- acidic integral membrane -like	0.5195		unknown
CGI_10001856	-0.677175	7.74216e-06	68.1362	-0.683585	7.56386e-07	70.9369	-0.710931	1.72463e-06	70.7241	-0.690564	Major facilitator superfamily domain-containing 8	0.75		GO:0055085;GO:0016021
CGI_10001245	-0.552265	6.83189e-06	1441.87	-0.433197	0.0109545	1429.29	-1.087	2.57794e-29	1868.28	-0.690819	mammalian ependymin-related 1-like	0.684		GO:0007160;GO:0005509;GO:0005576
CGI_10027078	-0.82218	3.1889e-11	2143.77	-0.536234	1.37991e-05	1965.22	-0.715903	1.60304e-05	2095.26	-0.691439	cat eye syndrome critical region 5	0.6975		unknown
CGI_10020808	-0.773926	0.00650769	8368.9	-0.652504	0.0438213	8251.22	-0.652041	0.0445866	8107.93	-0.692823	hypothetical protein CGI_10020808	1		GO:0016021
CGI_10006172	-0.727865	1.45772e-08	89.3272	-0.862762	7.46747e-11	98.7427	-0.488978	0.00169298	82.4673	-0.693202	Tripartite motif-containing 2	0.7095		GO:0016567
CGI_10007038	-0.380645	0.00779737	138.322	-0.82751	1.4688e-11	173.854	-0.874775	5.79845e-10	174.885	-0.69431	carbohydrate sulfotransferase 1-like	0.5715		GO:0008152;GO:0008146
CGI_10002955	-0.633369	0.00179833	987.422	-0.843601	2.83733e-07	1123.29	-0.611677	0.000340605	994.399	-0.696216	serine protease inhibitor Cvsi-2-like	0.5825		unknown
CGI_10028555	-0.642533	0.00638727	28.0315	-0.860847	1.29222e-05	32.1805	-0.591996	0.00698401	27.9272	-0.698459	hypothetical protein CGI_10028555	1		unknown
CGI_10010897	-0.948347	3.24651e-23	883.684	-0.802529	2.61834e-11	860.728	-0.345433	0.00162211	696.334	-0.69877	proline iminopeptidase-like isoform X2 [Crassostrea gigas]	0.731		GO:0006508;GO:0008233
CGI_10014527	-0.932854	1.02313e-13	1212.59	-0.546908	3.75091e-07	1060.22	-0.624285	6.60626e-10	1075.79	-0.701349	multiple epidermal growth factor-like domains 10	0.5875		GO:0004725;GO:0035335
CGI_10024248	-0.598012	2.43006e-05	528.248	-0.869223	1.15488e-07	621.719	-0.643689	1.31678e-06	549.753	-0.703641	GPI-anchored [Crassostrea gigas]	0.5425		GO:0006508;GO:0016021;GO:0004252
CGI_10024720	-0.799841	2.8331e-14	274.962	-0.710317	1.23522e-07	275.513	-0.612503	2.70469e-10	258.446	-0.707554	---NA---	0		unknown
CGI_10017072	-1.03317	4.49095e-14	525.288	-0.426992	0.000647808	416.343	-0.666265	1.79538e-05	453.635	-0.708808	Tubulin polyglutamylase TTLL11	0.676		GO:0006464
CGI_10024716	-0.421627	0.000206056	227.911	-0.99463	1.25671e-19	304.121	-0.715344	1.00272e-10	263.353	-0.710533	Protocadherin-11 X-linked	0.66		GO:0005509;GO:0016021;GO:0007156
CGI_10024052	-0.55961	0.00410019	161.259	-0.886267	1.6487e-06	194.401	-0.690941	3.7565e-05	173.974	-0.712273	hypothetical protein CGI_10024052	0.7533		unknown
CGI_10016886	-0.735213	6.99497e-09	190.606	-0.68944	2.21734e-05	194.936	-0.715723	3.02098e-07	193.284	-0.713458	Cell adhesion molecule 3	0.6522		GO:0008270;GO:0005515;GO:0016021
CGI_10004527	-0.70036	1.16124e-10	6884.69	-0.93432	2.56903e-20	7942.93	-0.50619	8.61453e-08	6465.77	-0.713623	Ganglioside GM2 activator	0.625		GO:0043085;GO:0008047;GO:0006689
CGI_10021717	-0.697474	0.0103314	67.6689	-0.6553	0.000117825	67.9322	-0.792446	0.00904563	72.8917	-0.715073	hypothetical protein CGI_10021717	0.82		unknown
CGI_10022011	-0.551732	3.11775e-06	128.643	-0.780083	1.93329e-12	147.671	-0.819362	9.28434e-16	147.379	-0.717059	Tripartite motif-containing 56 [Crassostrea gigas]	0.506		GO:0008270;GO:0005622;GO:0016567
CGI_10014467	-0.581959	0.0180134	25.7823	-0.824693	5.92667e-05	29.8372	-0.745032	0.00035107	28.2344	-0.717228	Methyltransferase 4	0.537		GO:0003676;GO:0008168;GO:0006139;GO:0032259
CGI_10023778	-0.784627	1.84993e-13	2442.33	-0.709625	2.99874e-10	2455.78	-0.662354	8.95364e-14	2359.59	-0.718869	Alpha-amylase 1	0.7615		GO:0004556;GO:0005975;GO:0043169
CGI_10021124	-1.05029	5.86882e-13	397.24	-0.467395	0.00132051	317.167	-0.640492	0.000405099	336.564	-0.719391	hypothetical protein CGI_10021124	1		unknown
CGI_10017429	-0.686089	8.39532e-06	130.89	-0.342026	0.0137852	117.476	-1.13608	2.47708e-15	164.748	-0.721397	Tripartite motif-containing 2	0.8275		GO:0008270;GO:0016310;GO:0016301;GO:0005622;GO:0016567
CGI_10028329	-0.724766	3.04518e-05	56.2487	-0.59042	0.00217659	54.9759	-0.852161	1.00661e-06	60.7501	-0.722449	Dual specificity phosphatase 19	0.6425		GO:0000188;GO:0006470;GO:0017017
CGI_10004708	-0.853571	2.81276e-06	94.5283	-0.724973	3.22196e-06	92.1694	-0.597604	0.000554124	85.7943	-0.725383	zinc metallo ase nas-12-like	0.99		unknown
CGI_10022610	-0.349881	0.000643744	333.331	-1.08369	8.91996e-14	480.975	-0.747263	8.58375e-05	405.887	-0.726946	Tripartite motif-containing 2	0.7395		GO:0008270;GO:0005622;GO:0016567
CGI_10027195	-0.829924	3.079e-16	18729.6	-0.725386	5.13884e-15	18565.5	-0.626055	1.58572e-15	17458.8	-0.727122	probable serine threonine- kinase fhkB	0.699		GO:0005509
CGI_10003712	-0.535009	0.0192058	784.401	-0.868732	0.00129612	962.766	-0.777679	0.0481365	945.736	-0.72714	glycine-rich cell wall structural -like	0.955		unknown
CGI_10026604	-0.836167	2.11903e-06	3101.9	-0.773538	1.25044e-06	3121.34	-0.581883	0.000203768	2815.21	-0.730529	probable chitinase 3	0.651		GO:0004568;GO:0005975;GO:0008061;GO:0006032;GO:0005576
CGI_10015905	-0.406033	0.0480611	245.325	-1.30586	1.1264e-22	384.101	-0.48351	0.0137302	258.784	-0.731799	neuroligin-3-like isoform X2	0.5945		GO:0048522;GO:0008152;GO:0007399;GO:0050803;GO:0050804;GO:0045202;GO:0044763;GO:0009966;GO:0052689;GO:0007610;GO:0051128
[truncated: 392 more rows]
