# Supplementary material for: Differential basal expression of immune genes confers Crassostrea gigas resistance to Pacific oyster mortality syndrome
Source: BMC Genomics. 2020 Jan 20;21:63. doi: 10.1186/s12864-020-6471-x (PMC6971885; doi:10.1186/s12864-020-6471-x)
Supplement: Supplementary file 6 — Additional file 6 Blast2GO annotation of the 28,027 genes identified in the genome of C. gigas. [file 12864_2020_6471_MOESM6_ESM.xlsx]

## Sheet: Galaxy88-(Join_two_Datasets_on_
ID	BestBlastHit	Length	MeanSimilarity	Goterms	Ecnumber	Interpro
CGI_10016615	Exonuclease 3 -5 domain-containing 1	1290	0.654	F:nucleic acid binding; F:3'-5' exonuclease activity; P:nucleic acid phosphodiester bond hydrolysis		PTHR12124 (PANTHER); PTHR12124:SF49 (PANTHER); IPR012337 (SUPERFAMILY)
CGI_10014608	PREDICTED: uncharacterized protein LOC105337279 [Crassostrea gigas]	1233	0.6433			no IPS match
CGI_10019528	suppressor of cytokine signaling 2-like	813	0.7005	P:negative regulation of signal transduction; C:intracellular; P:intracellular signal transduction		IPR000980 (PRINTS); IPR001496 (SMART); IPR001496 (SMART); IPR000980 (SMART); IPR000980 (G3DSA:3.30.505.GENE3D); IPR001496 (PFAM); IPR000980 (PFAM); PTHR24369:SF97 (PANTHER); PTHR24369 (PANTHER); IPR001496 (PROSITE_PROFILES); IPR000980 (PROSITE_PROFILES); IPR001496 (SUPERFAMILY); IPR000980 (SUPERFAMILY)
CGI_10001259	hypothetical protein CGI_10001259	1332	0.9067			no IPS match
CGI_10007173	von Willebrand factor type EGF and pentraxin domain-containing 1-like	3786	0.54	F:calcium ion binding		IPR000884 (SMART); IPR000742 (SMART); IPR011641 (SMART); IPR000436 (SMART); IPR001881 (SMART); IPR000884 (PFAM); G3DSA:2.10.70.10 (GENE3D); IPR000436 (PFAM); IPR003410 (PFAM); G3DSA:2.10.25.10 (GENE3D); G3DSA:2.20.100.10 (GENE3D); IPR000742 (PFAM); G3DSA:2.10.25.10 (GENE3D); IPR011641 (PFAM); G3DSA:2.10.70.10 (GENE3D); PTHR24050 (PANTHER); IPR000436 (PROSITE_PROFILES); IPR000742 (PROSITE_PROFILES…
CGI_10010438	huntingtin-interacting 1-related - partial	1089	0.918			no IPS match
CGI_10027111	hypothetical protein CGI_10027111	411	1
CGI_10024233	hemagglutinin amebocyte aggregation factor-like	573	0.726	F:catalytic activity; P:metabolic process
CGI_10000502	huntingtin-interacting 1-related - partial	336	0.9325			no IPS match
CGI_10011217	RHS repeat-associated core domain-containing [[Clostridium] straminisolvens]	399	0.655	P:self proteolysis; C:membrane; C:integral component of membrane		PTHR35378 (PANTHER)
CGI_10021170	Interferon regulatory factor 2	975	0.717	F:regulatory region DNA binding
CGI_10006117	Phosphatidylinositol-glycan-specific phospholipase D	354	0.7263	C:integral component of membrane
CGI_10012592	hypothetical protein CGI_10012592	582	0.8314	C:integral component of membrane		no IPS match
CGI_10009106	hypothetical protein CGI_10009106	669	0.6125
CGI_10009568	hypothetical protein CGI_10009568	492	0.7575
CGI_10017757	Actin-5C [Trichinella pseudospiralis]	1140	0.9285	F:ATP binding; C:cytoskeleton; C:cytoplasm
CGI_10026717	RNA-dependent RNA polymerase 1	900	0.6515	F:RNA-directed RNA polymerase activity; P:transcription, RNA-templated	EC:2.7.7.48	IPR007855 (PFAM); PTHR23079:SF1 (PANTHER); IPR007855 (PANTHER)
CGI_10016809	hypothetical protein CGI_10016809	573	1	C:integral component of membrane
CGI_10011215	hypothetical protein CGI_10011215	387	0.646	C:membrane; C:integral component of membrane		PTHR35378 (PANTHER)
CGI_10028359	signal CUB and EGF-like domain-containing 1	588	0.678
CGI_10019948	GTPase IMAP family member 7	2010	0.625	C:lipid particle; F:GTP binding; F:protein homodimerization activity; F:GTPase activity		IPR006703 (PFAM); IPR027417 (G3DSA:3.40.50.GENE3D); PTHR10903 (PANTHER); IPR006703 (PROSITE_PROFILES); IPR027417 (SUPERFAMILY)
CGI_10028360	signal CUB and EGF-like domain-containing 1	588	0.6773
CGI_10002879	myb X isoform X1 [Crassostrea gigas]	633	0.98
CGI_10019154	sacsin isoform X1 [Corvus cornix cornix]	3684	0.565
CGI_10018396	radical S-adenosyl methionine domain-containing 2	1050	0.87	C:endoplasmic reticulum membrane; C:lipid particle; F:catalytic activity; F:metal ion binding; P:innate immune response; P:metabolic process; C:integral component of membrane; P:defense response to virus; F:4 iron, 4 sulfur cluster binding		IPR006638 (SMART); IPR007197 (PFAM); PF13353 (PFAM); IPR013785 (G3DSA:3.20.20.GENE3D); IPR026372 (TIGRFAM); PTHR21339 (PANTHER); SSF102114 (SUPERFAMILY)
CGI_10017375	laccase-like isoform X2	2196	0.7185	F:copper ion binding; F:oxidoreductase activity; P:oxidation-reduction process		IPR008972 (G3DSA:2.60.40.GENE3D); IPR008972 (G3DSA:2.60.40.GENE3D); IPR011706 (PFAM); IPR011707 (PFAM); IPR001117 (PFAM); IPR008972 (G3DSA:2.60.40.GENE3D); PTHR11709:SF75 (PANTHER); PTHR11709 (PANTHER); IPR008972 (SUPERFAMILY); IPR008972 (SUPERFAMILY); IPR008972 (SUPERFAMILY)
CGI_10005872	[Physcomitrella patens]	831	0.6375	P:protein deubiquitination; F:ubiquitin-protein transferase activity; P:cellular component organization; P:single-organism cellular process; F:binding; P:regulation of biological process; F:thiol-dependent ubiquitinyl hydrolase activity; P:protein ubiquitination	EC:3.4.19.12
CGI_10011889	[Nematostella vectensis]	1383	0.6425	F:phosphoprotein phosphatase activity; P:protein dephosphorylation		no IPS match
CGI_10021136	Toll-like receptor 1	1263	0.6315	P:signal transduction; C:integral component of membrane
CGI_10006118	Phosphatidylinositol-glycan-specific phospholipase D	345	0.6988	C:integral component of membrane
CGI_10015342	hypothetical protein CGI_10015342	1161	0.7483	F:transferase activity, transferring glycosyl groups; P:protein ADP-ribosylation; F:NAD(P)+-protein-arginine ADP-ribosyltransferase activity; F:transferase activity		G3DSA:3.90.176.10 (GENE3D); IPR020683 (G3DSA:1.25.40.GENE3D); IPR020683 (SUPERFAMILY); SSF56399 (SUPERFAMILY)
CGI_10005393	Inhibitor of apoptosis	1893	0.645	F:zinc ion binding
CGI_10000527	PREDICTED: uncharacterized protein LOC105324015 [Crassostrea gigas]	534	0.75			no IPS match
CGI_10022061	hypothetical protein CGI_10022061	381	0.6833	C:membrane; C:integral component of membrane
CGI_10012106	LIN-24 (Twenty-four) Like [Caenorhabditis elegans]	771	0.5525	F:protein binding
CGI_10000860	hypothetical protein CGI_10000860	1671	0.7729	F:transferase activity, transferring glycosyl groups; P:protein ADP-ribosylation; F:NAD(P)+-protein-arginine ADP-ribosyltransferase activity; F:transferase activity		IPR020683 (G3DSA:1.25.40.GENE3D); SSF56399 (SUPERFAMILY); IPR020683 (SUPERFAMILY)
CGI_10016225	Fas ligand	816	0.7413	P:immune response; C:membrane; F:tumor necrosis factor receptor binding
CGI_10004319	Tripartite motif-containing 2	1197	0.7805	F:zinc ion binding; C:intracellular
CGI_10012725	Myeloid differentiation primary response 88	609	0.601	P:toll-like receptor signaling pathway; F:identical protein binding; P:3'-UTR-mediated mRNA stabilization; P:cellular response to mechanical stimulus; P:positive regulation of type I interferon production; C:membrane; P:positive regulation of I-kappaB kinase/NF-kappaB signaling; P:response to interleukin-1; C:cytoplasmic part; F:TIR domain binding
CGI_10024808	PREDICTED: uncharacterized protein LOC105331509 [Crassostrea gigas]	912	1	C:integral component of membrane
CGI_10022810	NFX1-type zinc finger-containing 1	3099	0.58	C:nucleus; F:transcription factor activity, sequence-specific DNA binding; F:zinc ion binding; P:regulation of transcription, DNA-templated
CGI_10028346	hypothetical protein CGI_10028346	552	0.9767	F:calcium ion binding
CGI_10006756	interferon-induced 44-like [Crassostrea gigas]	528	0.8165	F:GTP binding
CGI_10001977	hypothetical protein CGI_10001977	477	1	C:integral component of membrane		no IPS match
CGI_10012786	tumor necrosis factor receptor superfamily member 27-like [Crassostrea gigas]	1041	0.89	C:integral component of membrane
CGI_10005710	RNA-dependent RNA polymerase 1	3681	0.629	F:RNA-directed RNA polymerase activity; P:transcription, RNA-templated	EC:2.7.7.48
CGI_10005392	Inhibitor of apoptosis	981	0.653	F:zinc ion binding
CGI_10006145	hypothetical protein CGI_10006145	894	0.7786	F:calcium ion binding		IPR011992 (G3DSA:1.10.238.GENE3D); IPR002048 (PROSITE_PROFILES); IPR011992 (SUPERFAMILY)
CGI_10028418	Fbox domain containing [Acanthamoeba castellanii Neff]	966	0.6935	C:integral component of membrane		IPR002035 (SMART); IPR002035 (G3DSA:3.40.50.GENE3D); IPR002035 (PFAM); IPR002035 (PROSITE_PROFILES); IPR002035 (SUPERFAMILY)
CGI_10010774	Interferon-induced 44	1245	0.6175	F:GTP binding
CGI_10016989	Interferon-induced helicase C domain-containing 1	942	0.54	F:organic cyclic compound binding; F:heterocyclic compound binding; P:metabolic process; F:helicase activity		IPR001650 (SMART); IPR027417 (G3DSA:3.40.50.GENE3D); IPR001650 (PFAM); IPR021673 (PFAM); PTHR14074 (PANTHER); IPR001650 (PROSITE_PROFILES); IPR027417 (SUPERFAMILY)
CGI_10016990	probable ATP-dependent RNA helicase DDX58	1380	0.575	F:nucleic acid binding; F:ATP binding; P:metabolic process; F:helicase activity		IPR014001 (SMART); IPR027417 (G3DSA:3.40.50.GENE3D); IPR011545 (PFAM); PTHR14074 (PANTHER); PTHR14074:SF18 (PANTHER); IPR014001 (PROSITE_PROFILES); IPR027417 (SUPERFAMILY)
CGI_10007478	patched domain-containing 3-like	1146	0.6465	P:signal transduction; C:integral component of membrane; F:hedgehog receptor activity; P:transport; F:transporter activity
CGI_10005874	ubiquitin carboxyl-terminal hydrolase 26-like	1089	0.8275
CGI_10005824	hypothetical protein CGI_10005824	855	0.95	C:integral component of membrane
CGI_10004922	IL17-5 [Crassostrea gigas]	399	1	C:extracellular region; F:cytokine activity
CGI_10017629	Signal transducer and transcription activator 6	2103	0.7	C:nucleus; F:DNA binding; F:transcription factor activity, sequence-specific DNA binding; P:signal transduction; C:membrane; P:regulation of transcription, DNA-templated; F:signal transducer activity
CGI_10005003	signal transducer and transcription activator isoform X5 [Stomoxys calcitrans]	1479	0.575	C:nucleus; F:DNA binding; F:transcription factor activity, sequence-specific DNA binding; P:signal transduction; P:hemopoiesis; P:regulation of transcription, DNA-templated; F:signal transducer activity		IPR011992 (G3DSA:1.10.238.GENE3D); IPR000980 (G3DSA:3.30.505.GENE3D); PTHR11801:SF43 (PANTHER); IPR001217 (PANTHER); IPR000980 (SUPERFAMILY)
CGI_10020734	interleukin 17 [Crassostrea gigas]	573	0.533	C:extracellular region; F:cytokine activity
CGI_10014307	dual specificity kinase splB-like [Hydra vulgaris]	1500	0.617	F:ATP binding; F:protein serine/threonine kinase activity; P:protein phosphorylation	EC:2.7.11
CGI_10005220	complement C1q tumor necrosis factor-related 3-like	492	0.5715	C:membrane; C:integral component of membrane		IPR001073 (SMART); IPR008983 (G3DSA:2.60.120.GENE3D); IPR001073 (PFAM); IPR001073 (PROSITE_PROFILES); IPR008983 (SUPERFAMILY)
CGI_10015407	homeobox aristaless	1131	0.7355	C:nucleus; C:integral component of membrane; P:regulation of transcription, DNA-templated; F:sequence-specific DNA binding
CGI_10006287	Cytochrome P450 1A1	372	0.674	F:iron ion binding; F:oxidoreductase activity, acting on paired donors, with incorporation or reduction of molecular oxygen; P:oxidation-reduction process; F:heme binding		no IPS match
CGI_10021409	Kinesin heavy chain	975	0.6865	F:microtubule motor activity; P:metabolic process; F:binding; P:microtubule-based movement; C:intracellular part		PTHR24115:SF513 (PANTHER); IPR027640 (PANTHER)
CGI_10027603	mediator of DNA damage checkpoint 1-like isoform X1	972	0.7067	C:membrane; C:integral component of membrane
CGI_10027441	helicase with zinc finger domain 2-like	8382	0.661	F:ligand-dependent nuclear receptor transcription coactivator activity; F:binding; P:regulation of nucleic acid-templated transcription		SM00955 (SMART); PF13086 (PFAM); PF13087 (PFAM); IPR027417 (G3DSA:3.40.50.GENE3D); IPR027417 (G3DSA:3.40.50.GENE3D); PF00773 (PFAM); PTHR10887 (PANTHER); IPR031191 (PTHR10887:PANTHER); IPR012340 (SUPERFAMILY); IPR027417 (SUPERFAMILY); IPR012340 (SUPERFAMILY); IPR027417 (SUPERFAMILY)
CGI_10019895	sacsin isoform X2	5040	0.5635
CGI_10002657	hypothetical protein CGI_10002657	1095	0.7733	C:integral component of membrane
CGI_10002015	Kinesin heavy chain	393	0.7665	F:nucleotide binding; F:ATP binding; F:microtubule motor activity; C:cytoskeleton; C:cytoplasm; P:metabolic process; P:microtubule-based movement; F:microtubule binding; C:microtubule		no IPS match
CGI_10025754	interleukin 17 [Octopus bimaculoides]	603	0.532	C:extracellular region; F:cytokine activity
CGI_10024393	Interferon-induced helicase C domain-containing 1	2031	0.6835	F:DNA binding; F:ATP binding; P:metabolic process; F:helicase activity		IPR001650 (SMART); IPR014001 (SMART); IPR027417 (G3DSA:3.40.50.GENE3D); IPR001650 (PFAM); IPR027417 (G3DSA:3.40.50.GENE3D); IPR016186 (G3DSA:3.10.100.GENE3D); IPR006935 (PFAM); PTHR14074 (PANTHER); IPR001650 (PROSITE_PROFILES); IPR014001 (PROSITE_PROFILES); IPR027417 (SUPERFAMILY); IPR016187 (SUPERFAMILY)
CGI_10017621	heat shock 90	2169	0.9475	F:ATP binding; F:unfolded protein binding; P:protein folding; P:response to stress		IPR020575 (PRINTS); IPR001404 (PIRSF); IPR003594 (SMART); IPR001404 (PFAM); IPR003594 (G3DSA:3.30.565.GENE3D); IPR003594 (PFAM); IPR001404 (PANTHER); IPR001404 (HAMAP); IPR003594 (SUPERFAMILY); IPR020568 (SUPERFAMILY); SSF110942 (SUPERFAMILY)
CGI_10003627	metalloreductase STEAP4-like [Aplysia californica]	1494	0.624	C:intracellular membrane-bounded organelle; C:integral component of membrane; C:endomembrane system; C:cytoplasmic part; P:single-organism transport		IPR028939 (PFAM); IPR013130 (PFAM); IPR016040 (G3DSA:3.40.50.GENE3D); PTHR14239 (PANTHER); PTHR14239:SF0 (PANTHER); IPR016040 (SUPERFAMILY)
CGI_10013278	hypothetical protein CGI_10013278	201	0.91
CGI_10014497	von Willebrand factor type EGF and pentraxin domain-containing 1-like isoform X2 [Crassostrea gigas]	2355	0.6635	F:chitin binding; P:chitin metabolic process; C:extracellular region
CGI_10026006	hypothetical protein CGI_10026006	606	0.92
CGI_10012305	PREDICTED: uncharacterized protein LOC105344292 [Crassostrea gigas]	510	0.7238	C:integral component of membrane		no IPS match
CGI_10009795	[Laccaria bicolor S238N-H82]	831	0.6647	C:integral component of membrane		no IPS match
CGI_10021916	Uncharacterized protein C3orf59	3741	0.863			IPR024810 (SMART); IPR024810 (PFAM); PTHR10656 (PANTHER)
CGI_10005873	polyubiquitin 8-like [Acropora digitifera]	1284	0.588	P:protein deubiquitination; F:ubiquitin-protein transferase activity; F:thiol-dependent ubiquitinyl hydrolase activity; P:protein ubiquitination	EC:3.4.19.12
CGI_10011447	hypothetical protein CGI_10011447	969	0.836	C:integral component of membrane		no IPS match
CGI_10011916	tyrosinase tyr-3	1824	0.678	F:oxidoreductase activity; F:metal ion binding; F:methyltransferase activity; P:oxidation-reduction process; P:primary metabolic process; P:organic substance metabolic process; P:methylation
CGI_10024671	inhibitor of apoptosis	1578	0.6075	F:zinc ion binding
CGI_10025773	Hemicentin- partial	2835	0.6735	C:membrane; F:scavenger receptor activity; P:receptor-mediated endocytosis
CGI_10013274	hypothetical protein CGI_10013274	189	0.805
CGI_10018987	kielin chordin	597	0.6275	F:peptidase inhibitor activity; P:negative regulation of peptidase activity		no IPS match
CGI_10023925	hypothetical protein CGI_10023925	282	1			no IPS match
CGI_10025193	hypothetical protein CGI_10025193	744	0.95	C:integral component of membrane
CGI_10027129	Hypoxia up-regulated 1	3069	0.746	F:ATP binding; C:membrane		IPR013126 (PRINTS); G3DSA:3.30.420.40 (GENE3D); IPR029047 (G3DSA:2.60.34.GENE3D); G3DSA:3.30.420.40 (GENE3D); G3DSA:3.30.30.30 (GENE3D); IPR029048 (G3DSA:1.20.1270.GENE3D); IPR013126 (PFAM); G3DSA:3.90.640.10 (GENE3D); PTHR19375 (PANTHER); PTHR19375:SF90 (PANTHER); SSF53067 (SUPERFAMILY); SSF53067 (SUPERFAMILY); IPR029048 (SUPERFAMILY)
CGI_10013277	hypothetical protein CGI_10013277	201	0.81
CGI_10008216	[Nematostella vectensis]	885	0.6025			PTHR33153 (PANTHER)
CGI_10010459	probable ATP-dependent RNA helicase DDX58	2709	0.5465	F:nucleic acid binding; F:ATP binding; P:metabolic process; F:helicase activity; P:positive regulation of cytokine production; P:response to stimulus
CGI_10002014	Kinesin heavy chain	210	0.903	F:ATP binding; F:microtubule motor activity; P:metabolic process; P:microtubule-based movement; C:microtubule; F:microtubule binding		PTHR24115:SF513 (PANTHER); IPR027640 (PANTHER)
CGI_10028807	Fas ligand	849	0.5191	P:immune response; C:integral component of membrane; F:tumor necrosis factor receptor binding		IPR006052 (PFAM); IPR008983 (G3DSA:2.60.120.GENE3D); IPR006052 (PROSITE_PROFILES); IPR008983 (SUPERFAMILY)
CGI_10006757	Interferon-induced 44	237	0.872	F:GTP binding
CGI_10027602	mediator of DNA damage checkpoint 1-like isoform X1	633	0.7157
CGI_10027512	Toll-like receptor 13	534	0.6495	P:signal transduction; P:innate immune response; C:integral component of membrane
CGI_10007684	Transient receptor potential cation channel subfamily M member 3	1413	0.7925	F:ion channel activity; P:ion transmembrane transport; C:integral component of membrane		IPR005821 (PFAM); PTHR13800:SF12 (PANTHER); PTHR13800 (PANTHER)
CGI_10000144	helicase with zinc finger domain 2-like isoform X1 [Crassostrea gigas]	912	0.7935	F:ligand-dependent nuclear receptor transcription coactivator activity; P:regulation of nucleic acid-templated transcription		IPR027417 (G3DSA:3.40.50.GENE3D); PF13086 (PFAM); IPR027417 (G3DSA:3.40.50.GENE3D); PF13087 (PFAM); PTHR10887 (PANTHER); PTHR10887:SF369 (PANTHER); IPR027417 (SUPERFAMILY)
CGI_10002570	glutathione-specific gamma-glutamylcyclotransferase 1-like	684	0.6485	F:nucleotide binding; F:nucleic acid binding		IPR006840 (PFAM); IPR013024 (G3DSA:3.10.490.GENE3D); PTHR12192:SF8 (PANTHER); IPR006840 (PANTHER); IPR013024 (SUPERFAMILY)
CGI_10010046	hypothetical protein CGI_10010046	1242	0.6617			IPR024810 (SMART); IPR024810 (PFAM)
CGI_10019949	Deoxyuridine 5 -triphosphate mitochondrial	2628	0.8545	F:magnesium ion binding; F:GTP binding; C:extracellular exosome; F:dUTP diphosphatase activity; C:mitochondrion; P:dUMP biosynthetic process; C:nucleoplasm; F:poly(A) RNA binding; P:dUTP catabolic process	EC:3.6.1.23	IPR008180 (PFAM); IPR008181 (TIGRFAM); IPR006703 (PFAM); IPR027417 (G3DSA:3.40.50.GENE3D); IPR029054 (G3DSA:2.70.40.GENE3D); PTHR11241 (PANTHER); PTHR11241:SF6 (PANTHER); IPR006703 (PROSITE_PROFILES); IPR029054 (SUPERFAMILY); IPR027417 (SUPERFAMILY)
CGI_10006729	ubiquitin carboxyl-terminal hydrolase 16 isoform X1	852	0.5735	P:protein deubiquitination; F:thiol-dependent ubiquitinyl hydrolase activity; P:ubiquitin-dependent protein catabolic process	EC:3.4.19.12
CGI_10019155	sacsin-like isoform X1 [Acropora digitifera]	6405	0.5615
CGI_10000756	hypothetical protein CGI_10000756	336	0.6936	F:oxidoreductase activity; P:metabolic process; C:membrane; C:integral component of membrane; P:oxidation-reduction process		no IPS match
CGI_10015430	N-acetylated-alpha-linked acidic dipeptidase	2145	0.9575	F:copper ion binding; F:oxidoreductase activity, acting on paired donors, with incorporation or reduction of molecular oxygen, reduced ascorbate as one donor, and incorporation of one atom of oxygen; P:oxidation-reduction process	EC:1.14.17
CGI_10017089	L-rhamnose-binding lectin CSL1-like isoform X2 [Crassostrea gigas]	558	0.6235	F:carbohydrate binding		IPR000922 (PFAM); IPR000922 (PROSITE_PROFILES)
CGI_10022880	deoxynucleoside triphosphate triphosphohydrolase SAMHD1	873	0.811	F:zinc ion binding; F:RNA binding; P:protein homotetramerization; P:regulation of innate immune response; P:defense response to virus; P:dATP catabolic process; C:plasma membrane; F:dGTPase activity; C:nucleoplasm; F:dGTP binding; P:dGTP catabolic process	EC:3.1.5.1	IPR003607 (SMART); IPR001660 (PFAM); IPR006674 (G3DSA:1.10.3210.GENE3D); IPR006674 (PFAM); PTHR11373 (PANTHER); PTHR11373:SF28 (PANTHER); SSF109604 (SUPERFAMILY)
CGI_10005871	hypothetical protein CGI_10005871	279	0.845
CGI_10005949	Fas ligand	597	0.7627	P:immune response; C:membrane; F:tumor necrosis factor receptor binding		IPR006052 (SMART); IPR006052 (PFAM); IPR008983 (G3DSA:2.60.120.GENE3D); IPR006052 (PROSITE_PROFILES); IPR008983 (SUPERFAMILY)
CGI_10025511	T9SS C-terminal target domain-containing	2130	0.5555	P:carbohydrate metabolic process		IPR013781 (G3DSA:3.20.20.GENE3D); IPR017853 (SUPERFAMILY)
CGI_10026933	myeloperoxidase-like [Crassostrea gigas]	1893	0.6945	F:peroxidase activity; P:response to oxidative stress; C:integral component of membrane; P:cellular oxidant detoxification; P:oxidation-reduction process; F:heme binding	EC:1.11.1.7	IPR019791 (PRINTS); IPR019791 (PFAM); IPR019791 (G3DSA:1.10.640.GENE3D); PTHR11475 (PANTHER); IPR019791 (PROSITE_PROFILES); IPR010255 (SUPERFAMILY)
CGI_10000338	inhibitor of apoptosis	933	0.7385	F:zinc ion binding		IPR001841 (SMART); IPR001370 (SMART); IPR001370 (PFAM); IPR001370 (G3DSA:1.10.1170.GENE3D); PF13920 (PFAM); PTHR10044:SF128 (PANTHER); PTHR10044 (PANTHER); IPR001841 (PROSITE_PROFILES); IPR001370 (PROSITE_PROFILES); SSF57924 (SUPERFAMILY)
CGI_10002429	partial [Nematostella vectensis]	1218	0.4975	C:extracellular region
CGI_10007177	von Willebrand factor type EGF and pentraxin domain-containing 1	270	0.6655	F:calcium ion binding		IPR011641 (SMART); IPR011641 (PFAM); IPR009030 (SUPERFAMILY)
CGI_10024392	probable ATP-dependent RNA helicase DHX58	3597	0.661	F:DNA binding; F:ATP binding; P:metabolic process; F:helicase activity		IPR001650 (SMART); IPR014001 (SMART); IPR031964 (PFAM); IPR006935 (PFAM); IPR021673 (PFAM); IPR027417 (G3DSA:3.40.50.GENE3D); IPR027417 (G3DSA:3.40.50.GENE3D); IPR011029 (G3DSA:1.10.533.GENE3D); IPR001650 (PFAM); PTHR14074 (PANTHER); IPR001650 (PROSITE_PROFILES); IPR014001 (PROSITE_PROFILES); IPR027417 (SUPERFAMILY); IPR027417 (SUPERFAMILY); IPR011029 (SUPERFAMILY)
CGI_10004062	Alpha- kinase vwkA	531	0.6535	C:integral component of membrane		no IPS match
CGI_10003417	heat shock 70	1905	0.9225	F:ATP binding
CGI_10004710	[Nematostella vectensis]	474	0.6481	F:metal ion binding		no IPS match
CGI_10019869	inhibitor of apoptosis	1683	0.691	F:zinc ion binding		IPR001841 (SMART); IPR001370 (SMART); IPR001370 (PFAM); PF13920 (PFAM); IPR001370 (G3DSA:1.10.1170.GENE3D); IPR001370 (G3DSA:1.10.1170.GENE3D); PTHR10044 (PANTHER); PTHR10044:SF128 (PANTHER); IPR001370 (PROSITE_PROFILES); IPR001841 (PROSITE_PROFILES); SSF57924 (SUPERFAMILY); SSF57924 (SUPERFAMILY)
CGI_10007066	PREDICTED: uncharacterized protein LOC105325524	435	0.8167
CGI_10018753	deleted in malignant brain tumors 1 -like	1875	0.6755	C:membrane; F:scavenger receptor activity; P:receptor-mediated endocytosis
CGI_10028419	[Nematostella vectensis]	420	0.674	F:zinc ion binding; F:metal ion binding; P:response to stress		G3DSA:2.60.60.30 (GENE3D)
CGI_10019898	sacsin-like	4482	0.544
CGI_10010566	Importin subunit alpha-2	1287	0.487	C:extracellular region
CGI_10024054	PREDICTED: uncharacterized protein LOC105329159 [Crassostrea gigas]	459	0.618			no IPS match
CGI_10016596	sacsin-like [Acropora digitifera]	1551	0.684	F:structural constituent of ribosome; C:ribosome; P:translation
CGI_10006311	ninjurin-1-like [Crassostrea gigas]	615	1	C:integral component of membrane; P:cell adhesion; P:tissue regeneration
CGI_10006153	hypothetical protein CGI_10006153	324	1	C:integral component of membrane		no IPS match
CGI_10008332	disulfide-isomerase A6	1314	0.7825	C:smooth endoplasmic reticulum; P:metabolic process; P:apoptotic cell clearance; P:cell redox homeostasis; C:endoplasmic reticulum-Golgi intermediate compartment; P:protein folding; C:plasma membrane; C:endoplasmic reticulum lumen; C:extracellular exosome; F:protein disulfide isomerase activity; C:melanosome; C:endoplasmic reticulum chaperone complex; P:platelet aggregation; P:response to endopla…	EC:5.3.4.1
CGI_10022976	hypothetical protein CGI_10022976	2145	0.9067			no IPS match
CGI_10005738	hypothetical protein CGI_10005738	387	0.6506			no IPS match
CGI_10023366	mesencephalic astrocyte-derived neurotrophic factor-like	549	0.76	F:growth factor activity; C:extracellular region; P:response to unfolded protein		IPR019345 (PFAM); IPR011001 (G3DSA:1.10.225.GENE3D); PTHR12990:SF10 (PANTHER); PTHR12990 (PANTHER); SSF68906 (SUPERFAMILY)
CGI_10011924	Tripartite motif-containing 2	1221	0.755	F:zinc ion binding; C:intracellular		IPR011042 (G3DSA:2.120.10.GENE3D); SSF101898 (SUPERFAMILY)
CGI_10021357	Tripartite motif-containing 2	609	0.5759	C:membrane; C:integral component of membrane; P:negative regulation of endopeptidase activity; C:extracellular region; F:metalloendopeptidase inhibitor activity
CGI_10022693	Cysteine dioxygenase type 1	597	0.6575	P:sulfur compound biosynthetic process; F:cysteine dioxygenase activity; F:iron ion binding; P:oxidation-reduction process; P:organonitrogen compound biosynthetic process; P:response to organonitrogen compound; P:response to oxygen-containing compound; P:L-cysteine catabolic process	EC:1.13.11.20	IPR010300 (PFAM); IPR014710 (G3DSA:2.60.120.GENE3D); PTHR12918 (PANTHER); IPR011051 (SUPERFAMILY)
CGI_10019897	sacsin-like	1239	0.502
CGI_10002654	MGC115402 [Xenopus laevis]	882	0.624
CGI_10015192	DNA-binding D-ETS-4-like isoform X2	1209	0.636	C:nucleus; F:transcription factor activity, sequence-specific DNA binding; P:regulation of transcription, DNA-templated; F:sequence-specific DNA binding		IPR000418 (PRINTS); IPR003118 (SMART); IPR000418 (SMART); IPR011991 (G3DSA:1.10.10.GENE3D); IPR003118 (PFAM); IPR000418 (PFAM); IPR013761 (G3DSA:1.10.150.GENE3D); PTHR11849:SF182 (PANTHER); PTHR11849 (PANTHER); IPR000418 (PROSITE_PROFILES); IPR003118 (PROSITE_PROFILES); IPR011991 (SUPERFAMILY); IPR013761 (SUPERFAMILY)
CGI_10020195	glycogen-binding subunit 76A-like	1134	0.6955			IPR005036 (PFAM); PTHR12307 (PANTHER); IPR005036 (PROSITE_PROFILES)
CGI_10003960	von Willebrand factor type EGF and pentraxin domain-containing 1-like	4149	0.497	F:binding
CGI_10010393	Golgi-associated plant pathogenesis-related 1 [Esox lucius]	711	0.6615	C:extracellular region		IPR001283 (PRINTS); IPR014044 (SMART); IPR014044 (PFAM); IPR014044 (G3DSA:3.40.33.GENE3D); PTHR10334:SF211 (PANTHER); IPR001283 (PANTHER); IPR014044 (SUPERFAMILY)
CGI_10006578		465				no IPS match
CGI_10003525	hypothetical protein CGI_10003525	468	0.99			IPR008983 (G3DSA:2.60.120.GENE3D); IPR008983 (SUPERFAMILY)
CGI_10022879	deoxynucleoside triphosphate triphosphohydrolase SAMHD1	531	0.7865	F:zinc ion binding; C:plasma membrane; F:dGTPase activity; C:nucleoplasm; P:dGTP catabolic process; P:type I interferon signaling pathway; F:RNA binding; F:protein binding; P:protein homotetramerization; P:regulation of innate immune response; P:defense response to virus; P:dATP catabolic process; F:dGTP binding	EC:3.1.5.1	PTHR11373:SF4 (PANTHER); PTHR11373 (PANTHER); SSF109604 (SUPERFAMILY)
CGI_10012722	myeloid differentiation primary response 88-like [Crassostrea gigas]	552	0.775	P:signal transduction
CGI_10002191	sacsin-like [Acropora digitifera]	9603	0.513			IPR003594 (G3DSA:3.30.565.GENE3D); IPR001623 (G3DSA:1.10.287.GENE3D); IPR003594 (G3DSA:3.30.565.GENE3D); G3DSA:1.20.120.330 (GENE3D); PTHR15600 (PANTHER); PTHR15600:SF28 (PANTHER); IPR003594 (SUPERFAMILY); IPR003594 (SUPERFAMILY); IPR003594 (SUPERFAMILY)
CGI_10003301	NFX1-type zinc finger-containing 1-like	2295	0.6265	F:poly(A) RNA binding		IPR027417 (G3DSA:3.40.50.GENE3D); PF13086 (PFAM); PTHR10887 (PANTHER); PTHR10887:SF379 (PANTHER); IPR027417 (SUPERFAMILY)
CGI_10012135	C-type lectin domain family 3 member A	1203	0.6345	C:membrane; C:integral component of membrane		IPR001304 (SMART); IPR001304 (PFAM); IPR016186 (G3DSA:3.10.100.GENE3D); IPR001304 (PROSITE_PROFILES); IPR016187 (SUPERFAMILY); IPR016187 (SUPERFAMILY)
CGI_10020606	hypothetical protein CGI_10020606	1026	0.93	C:integral component of membrane		no IPS match
CGI_10020387	fatty acid synthase-like	7698	0.7215	F:3-oxoacyl-[acyl-carrier-protein] synthase activity; F:[acyl-carrier-protein] S-malonyltransferase activity; F:3-hydroxypalmitoyl-[acyl-carrier-protein] dehydratase activity; F:3-oxoacyl-[acyl-carrier-protein] reductase (NADPH) activity; F:enoyl-[acyl-carrier-protein] reductase (NADPH, B-specific) activity; F:myristoyl-[acyl-carrier-protein] hydrolase activity; F:palmitoyl-[acyl-carrier-protein]…	EC:2.3.1.41; EC:4.2.1.61; EC:3.1.2.14; EC:2.3.1.38; EC:1.1.1.100; EC:2.3.1.39; EC:1.3.1.10	IPR020807 (SMART); IPR020841 (SMART); IPR020801 (SMART); SM00822 (SMART); IPR020806 (SMART); IPR020843 (SMART); IPR016040 (G3DSA:3.40.50.GENE3D); IPR020807 (PFAM); IPR013968 (PFAM); IPR016039 (G3DSA:3.40.47.GENE3D); IPR009081 (G3DSA:1.10.1200.GENE3D); IPR016040 (G3DSA:3.40.50.GENE3D); IPR009081 (PFAM); IPR014031 (PFAM); G3DSA:3.30.70.250 (GENE3D); IPR029058 (G3DSA:3.40.50.GENE3D); IPR014043 (PFAM…
CGI_10025980	PREDICTED: uncharacterized protein LOC105345659 [Crassostrea gigas]	558	0.6114	C:integral component of membrane
CGI_10018909	disease resistance RGA3	4302	0.675	P:transmembrane transport; C:integral component of membrane; F:ADP binding; F:transporter activity
CGI_10015343	hypothetical protein CGI_10015343	333	0.66	F:oxidoreductase activity; P:metabolic process; C:membrane; C:integral component of membrane; P:oxidation-reduction process		G3DSA:2.10.50.10 (GENE3D); SSF57586 (SUPERFAMILY)
CGI_10018986	hypothetical protein CGI_10018986	489	0.67			IPR006150 (SMART)
CGI_10004252	ankyrin repeat and KH domain-containing 1-like [Biomphalaria glabrata]	684	0.593	F:ATP binding; C:membrane; C:integral component of membrane; F:protein kinase activity; P:protein phosphorylation
CGI_10008415	chromobox 8	750	0.87	C:nucleus
CGI_10015771	BTB and MATH domain-containing 38-like	780	0.6435	P:proteolysis; F:serine-type endopeptidase activity	EC:3.4.21
CGI_10006232	NFX1-type zinc finger-containing 1	2385	0.549	C:nucleus; F:transcription factor activity, sequence-specific DNA binding; F:zinc ion binding; F:metal ion binding; C:membrane; C:integral component of membrane; P:regulation of transcription, DNA-templated; F:poly(A) RNA binding
CGI_10008842	hypothetical protein CGI_10008842	348	0.98	C:integral component of membrane
CGI_10010646	heat shock 70	1905	0.94	F:ATP binding		IPR013126 (PRINTS); G3DSA:3.30.420.40 (GENE3D); IPR013126 (PFAM); IPR029048 (G3DSA:1.20.1270.GENE3D); G3DSA:3.90.640.10 (GENE3D); IPR029047 (G3DSA:2.60.34.GENE3D); G3DSA:3.30.30.30 (GENE3D); G3DSA:3.30.420.40 (GENE3D); PTHR19375:SF152 (PANTHER); PTHR19375 (PANTHER); SSF53067 (SUPERFAMILY); IPR029047 (SUPERFAMILY); IPR029048 (SUPERFAMILY); SSF53067 (SUPERFAMILY)
CGI_10019737	condensation domain [Leptospira fainei]	1506	0.5827	P:alcohol metabolic process; F:alcohol O-acetyltransferase activity	EC:2.3.1.84	IPR010828 (PFAM); SSF52777 (SUPERFAMILY)
CGI_10021954	ATP-dependent RNA helicase chloroplastic-like [Parasteatoda tepidariorum]	6261	0.5995	F:nucleic acid binding; F:ATP binding; F:zinc ion binding; P:metabolic process; F:ATP-dependent helicase activity		IPR007502 (SMART); IPR002867 (SMART); IPR014001 (SMART); IPR001650 (SMART); IPR027417 (G3DSA:3.40.50.GENE3D); IPR001650 (PFAM); IPR012677 (G3DSA:3.30.70.GENE3D); IPR027417 (G3DSA:3.40.50.GENE3D); IPR012677 (G3DSA:3.30.70.GENE3D); IPR011545 (PFAM); IPR007502 (PFAM); IPR013083 (G3DSA:3.30.40.GENE3D); IPR011709 (PFAM); IPR002867 (PFAM); PTHR18934 (PANTHER); IPR001650 (PROSITE_PROFILES); IPR014001 (P…
CGI_10028280	Cytochrome P450 1A1	372	0.677	F:iron ion binding; F:oxidoreductase activity, acting on paired donors, with incorporation or reduction of molecular oxygen; P:oxidation-reduction process; F:heme binding		no IPS match
CGI_10019718	[Micromonas commoda]	762	0.6465	F:metal ion binding		IPR002893 (PFAM); PTHR12298 (PANTHER); IPR002893 (PROSITE_PROFILES); SSF144232 (SUPERFAMILY)
CGI_10003823	COMM domain-containing 3	1230	0.6435
CGI_10003183	deoxynucleoside triphosphate triphosphohydrolase SAMHD1-like	483	0.709	F:nucleic acid binding; C:nucleus; F:metal ion binding; P:purine deoxyribonucleotide catabolic process; P:defense response; P:immune system process; P:purine deoxyribonucleoside triphosphate catabolic process; F:hydrolase activity
CGI_10005450	leucine-rich repeat-containing 32	2148	0.566	C:integral component of membrane		IPR001611 (PFAM); IPR032675 (G3DSA:3.80.10.GENE3D); IPR001611 (PROSITE_PROFILES); IPR032675 (SUPERFAMILY)
CGI_10026451	GTPase IMAP family member 4-like	918	0.7015	F:GTP binding		IPR027417 (G3DSA:3.40.50.GENE3D); IPR006703 (PFAM); PTHR10903 (PANTHER); IPR006703 (PROSITE_PROFILES); IPR027417 (SUPERFAMILY)
CGI_10011040	Phosphoinositide 3-kinase adapter 1	1128	0.558	P:positive regulation of response to stimulus; P:regulation of cellular process; P:regulation of innate immune response; P:phosphorylation; F:kinase activity; P:positive regulation of immune system process
CGI_10015492	78 kDa glucose-regulated	1986	0.9445	C:endoplasmic reticulum lumen; F:ATP binding
CGI_10000441	Krueppel-like factor 5 [Crassostrea gigas]	1422	0.8825	F:nucleic acid binding; F:metal ion binding		IPR015880 (SMART); IPR013087 (G3DSA:3.30.160.GENE3D); IPR013087 (G3DSA:3.30.160.GENE3D); PTHR24409 (PANTHER); PTHR24409:SF60 (PANTHER); IPR007087 (PROSITE_PROFILES); SSF57667 (SUPERFAMILY); SSF57667 (SUPERFAMILY)
CGI_10011328	solute carrier family 28 member 3-like [Crassostrea gigas]	1878	0.7825	F:nucleoside:sodium symporter activity; C:integral component of plasma membrane; P:nucleoside transmembrane transport
CGI_10010773	interferon-induced 44-like	1464	0.727	F:GTP binding
CGI_10027439	teratocarcinoma-derived growth factor 1-like	528	0.6305			IPR019011 (PFAM); SSF57196 (SUPERFAMILY)
CGI_10019228	cartilage matrix -like	1971	0.5465	C:collagen trimer
CGI_10003710	Dual oxidase	591	0.5483	F:calcium ion binding
CGI_10010171	Heat shock Hsp20 domain containing	1200	0.6083			IPR002068 (PFAM); IPR002068 (PROSITE_PROFILES); IPR008978 (SUPERFAMILY)
CGI_10022585	heat shock 70 kDa 12A-like [Crassostrea gigas]	1455	0.6265	F:nucleotide binding; F:ATP binding		G3DSA:3.30.420.40 (GENE3D); G3DSA:3.30.420.40 (GENE3D); IPR013126 (PFAM); PTHR14187:SF47 (PANTHER); PTHR14187 (PANTHER); SSF53067 (SUPERFAMILY); SSF53067 (SUPERFAMILY)
CGI_10009399	PREDICTED: uncharacterized protein LOC105345070 [Crassostrea gigas]	387	0.8114	C:integral component of membrane
CGI_10004837	inhibitor of nuclear factor-kappaB	594	0.693
CGI_10003083	probable ATP-dependent RNA helicase DHX58	1617	0.6195	F:nucleotide binding; F:nucleic acid binding; P:metabolic process; F:helicase activity
CGI_10000389	metallo ase inhibitor 3-like	492	0.614	P:negative regulation of endopeptidase activity; C:extracellular region; F:metalloendopeptidase inhibitor activity
CGI_10020900	hypothetical protein CGI_10020900	714	1			no IPS match
CGI_10024466	chondroitin proteoglycan-2-like	1071	0.5735	F:chitin binding; P:chitin metabolic process; C:extracellular region		IPR002557 (SMART); IPR002035 (SMART); IPR002557 (PFAM); IPR002035 (PFAM); IPR002035 (G3DSA:3.40.50.GENE3D); IPR002557 (G3DSA:2.170.140.GENE3D); PTHR23301 (PANTHER); IPR002557 (PROSITE_PROFILES); IPR002035 (PROSITE_PROFILES); IPR002035 (SUPERFAMILY); IPR002557 (SUPERFAMILY); IPR002557 (SUPERFAMILY)
CGI_10018725	Tissue factor pathway inhibitor 2	306	0.678	F:serine-type endopeptidase inhibitor activity; P:negative regulation of endopeptidase activity
CGI_10006234	hypothetical protein CGI_10006234	357	1
CGI_10006248	tRNA 2 -phosphotransferase 1	1773	0.792	P:tRNA splicing, via endonucleolytic cleavage and ligation; F:transferase activity, transferring phosphorus-containing groups
CGI_10003270	interferon regulatory factor 8	1428	0.5525	F:transcription factor activity, sequence-specific DNA binding; P:hemopoiesis; P:regulation of transcription, DNA-templated; F:regulatory region DNA binding; P:single-organism cellular process; P:defense response; C:intracellular part		IPR001346 (PRINTS); IPR001346 (SMART); IPR019471 (SMART); IPR019471 (PFAM); IPR001346 (PFAM); IPR011991 (G3DSA:1.10.10.GENE3D); IPR017855 (G3DSA:2.60.200.GENE3D); PTHR11949 (PANTHER); IPR001346 (PROSITE_PROFILES); IPR008984 (SUPERFAMILY); IPR011991 (SUPERFAMILY)
CGI_10027604	hypothetical protein CGI_10027604	411	0.785
CGI_10026443	TPR and ankyrin repeat-containing partial	8175	0.597	P:ion transport; C:integral component of membrane		IPR011990 (G3DSA:1.25.40.GENE3D); IPR027361 (G3DSA:1.20.120.GENE3D); IPR027417 (G3DSA:3.40.50.GENE3D); IPR020683 (G3DSA:1.25.40.GENE3D); PTHR21529:SF4 (PANTHER); PTHR21529 (PANTHER); IPR020683 (PROSITE_PROFILES); IPR006029 (SUPERFAMILY); IPR011990 (SUPERFAMILY); IPR020683 (SUPERFAMILY); IPR011990 (SUPERFAMILY); IPR027417 (SUPERFAMILY)
CGI_10010105	ATP-dependent RNA helicase chloroplastic-like [Parasteatoda tepidariorum]	3687	0.597	F:nucleotide binding; F:metal ion binding; P:metabolic process; F:helicase activity		IPR002867 (SMART); IPR007502 (SMART); IPR001650 (SMART); IPR027417 (G3DSA:3.40.50.GENE3D); IPR007502 (PFAM); IPR011709 (PFAM); IPR001650 (PFAM); PTHR18934 (PANTHER); IPR001650 (PROSITE_PROFILES); SSF57850 (SUPERFAMILY); SSF57850 (SUPERFAMILY); IPR027417 (SUPERFAMILY)
CGI_10014035	probable ATP-dependent RNA helicase DHX58	1098	0.6315	F:DNA binding; F:ATP binding; P:metabolic process; F:helicase activity; P:regulation of apoptotic process
CGI_10023032	hypothetical protein CGI_10023032	1017	0.8315	F:zinc ion binding		IPR007527 (PROSITE_PROFILES)
CGI_10004027	epithelial-stromal interaction 1-like	870	0.54	P:biological_process; C:cellular_component; F:molecular_function		PTHR22529:SF1 (PANTHER); IPR026185 (PANTHER)
CGI_10016248	Group XV phospholipase A2	453	0.8567	F:O-acyltransferase activity; P:lipid metabolic process	EC:2.3.1	no IPS match
CGI_10021896	7-methylguanosine phosphate-specific 5 -nucleotidase A-like isoform X6 [Aplysia californica]	879	0.7705	F:nucleotide binding; F:magnesium ion binding; F:5'-nucleotidase activity; C:intracellular membrane-bounded organelle; C:cytoplasmic part; P:dephosphorylation; P:nucleotide metabolic process	EC:3.1.3.5	IPR006434 (TIGRFAM); IPR006434 (PFAM); PTHR13045 (PANTHER); IPR023214 (SUPERFAMILY)
CGI_10002594	heat shock 70	1905	0.9395	F:ATP binding
CGI_10020743	alternative mitochondrial-like	915	0.7995	F:alternative oxidase activity; C:integral component of membrane; P:oxidation-reduction process
CGI_10015817	phosphatidylinositol 4,5-bisphosphate 3-kinase catalytic subunit alpha isoform-like	3153	0.773	C:phosphatidylinositol 3-kinase complex; P:phosphatidylinositol-mediated signaling; P:regulation of collateral sprouting in absence of injury; P:phosphatidylinositol phosphorylation; F:phosphatidylinositol-4,5-bisphosphate 3-kinase activity; F:1-phosphatidylinositol-4-phosphate 3-kinase activity; C:intracellular; C:plasma membrane; F:1-phosphatidylinositol-3-kinase activity	EC:2.7.1.153; EC:2.7.1.154; EC:2.7.1.137	IPR000341 (SMART); IPR000403 (SMART); IPR002420 (SMART); IPR001263 (SMART); IPR003113 (SMART); G3DSA:3.10.20.90 (GENE3D); G3DSA:3.30.1010.10 (GENE3D); IPR000008 (G3DSA:2.60.40.GENE3D); G3DSA:3.10.20.90 (GENE3D); IPR003113 (PFAM); IPR001263 (G3DSA:1.25.40.GENE3D); IPR000403 (PFAM); IPR000341 (PFAM); IPR002420 (PFAM); IPR000403 (G3DSA:1.10.1070.GENE3D); IPR001263 (PFAM); IPR015433 (PANTHER); PTHR10…
CGI_10008977	Sushi repeat-containing SRPX2	2175	0.6765	F:oxidoreductase activity; F:calcium ion binding; P:oxidation-reduction process
CGI_10018518	hypothetical protein CGI_10018518	474	1	C:extracellular region; F:cytokine activity
CGI_10009748	Splicing factor 3B subunit 1	747	0.8775	C:integral component of membrane		no IPS match
CGI_10011308	kyphoscoliosis peptidase-like	3531	0.5505	C:membrane; C:integral component of membrane		IPR002931 (SMART); IPR002931 (PFAM); PTHR11039:SF43 (PANTHER); PTHR11039 (PANTHER); SSF54001 (SUPERFAMILY); SSF54001 (SUPERFAMILY); SSF54001 (SUPERFAMILY)
CGI_10005474	NFX1-type zinc finger-containing 1-like	918	0.581	F:binding
CGI_10011967	Exonuclease 3 -5 domain-containing 1	1761	0.7165	F:nucleic acid binding; F:3'-5' exonuclease activity; P:nucleic acid phosphodiester bond hydrolysis
CGI_10000241	Sushi domain-containing 2	417	0.7056	F:GTP binding; C:membrane		IPR027417 (G3DSA:3.40.50.GENE3D); IPR007743 (PFAM); IPR027417 (G3DSA:3.40.50.GENE3D); IPR027417 (SUPERFAMILY)
CGI_10013239	Zonadhesin	2346	1			no IPS match
CGI_10001976	hypothetical protein CGI_10001976	459	0.99			no IPS match
CGI_10007669	hypothetical protein CGI_10007669	960	1	C:integral component of membrane
CGI_10027395	78 kDa glucose-regulated	1662	0.8925	F:ATPase activity; C:myelin sheath; C:smooth endoplasmic reticulum; C:endoplasmic reticulum-Golgi intermediate compartment; P:positive regulation of embryonic development; P:ER overload response; C:endoplasmic reticulum lumen; F:ATP binding; P:cerebellar Purkinje cell layer development; C:extracellular exosome; C:focal adhesion; P:cellular response to interleukin-4; P:positive regulation of prote…	EC:1.3.1.74; EC:3.6.1.3	IPR013126 (PRINTS); G3DSA:3.90.640.10 (GENE3D); IPR010345 (PFAM); IPR029034 (G3DSA:2.10.90.GENE3D); G3DSA:3.30.420.40 (GENE3D); G3DSA:3.30.30.30 (GENE3D); G3DSA:3.30.420.40 (GENE3D); IPR013126 (PFAM); PTHR19375 (PANTHER); PTHR19375:SF157 (PANTHER); SSF53067 (SUPERFAMILY); SSF53067 (SUPERFAMILY); IPR029034 (SUPERFAMILY)
CGI_10009732	DBH-like monooxygenase 1 [Crassostrea gigas]	4239	0.86	F:copper ion binding; F:oxidoreductase activity, acting on paired donors, with incorporation or reduction of molecular oxygen, reduced ascorbate as one donor, and incorporation of one atom of oxygen; P:oxidation-reduction process	EC:1.14.17
CGI_10011220	hypothetical protein CGI_10011220	240	0.7365	C:integral component of membrane		no IPS match
CGI_10012759	malonyl- mitochondrial-like [Biomphalaria glabrata]	1455	0.724	P:fatty acid biosynthetic process; F:malonyl-CoA decarboxylase activity	EC:4.1.1.9
CGI_10019612	hypothetical protein CGI_10019612	9336	0.5915			IPR003594 (G3DSA:3.30.565.GENE3D); IPR024975 (PFAM); PTHR32387 (PANTHER); PTHR32387:SF0 (PANTHER); IPR025605 (PROSITE_PROFILES); IPR003594 (SUPERFAMILY)
CGI_10018475	Sjoegren syndrome nuclear autoantigen 1 homolog	351	0.9195			IPR033362 (PANTHER); PTHR28661:SF1 (PANTHER); PD968187 (PRODOM)
CGI_10015429	N-acetylated-alpha-linked acidic dipeptidase	534	0.98	F:copper ion binding; F:oxidoreductase activity, acting on paired donors, with incorporation or reduction of molecular oxygen, reduced ascorbate as one donor, and incorporation of one atom of oxygen; P:oxidation-reduction process	EC:1.14.17
CGI_10009495	dnaJ homolog subfamily B member 1	1065	0.7105	F:unfolded protein binding; P:protein folding
CGI_10013672	myeloid differentiation primary response 88-like [Crassostrea gigas]	1065	0.712	P:signal transduction		IPR000157 (SMART); IPR000157 (G3DSA:3.40.50.GENE3D); IPR011029 (G3DSA:1.10.533.GENE3D); IPR000157 (PFAM); IPR000488 (PFAM); PTHR15079 (PANTHER); IPR000157 (PROSITE_PROFILES); IPR000488 (PROSITE_PROFILES); IPR000157 (SUPERFAMILY); IPR011029 (SUPERFAMILY)
CGI_10026703	BAG family molecular chaperone regulator 4	1350	0.6465	P:positive regulation of cellular process; F:chaperone binding; P:cellular process
CGI_10010551	methionine synthase isoform X1	4329	0.8495	P:methionine biosynthetic process; P:pteridine-containing compound metabolic process; F:methionine synthase activity; F:zinc ion binding; F:cobalamin binding; C:integral component of membrane; C:cytosol; F:S-adenosylmethionine-homocysteine S-methyltransferase activity; P:methylation	EC:2.1.1.13
CGI_10026192	transcriptional regulator SKO1-like [Crassostrea gigas]	618	1	F:transcription factor activity, sequence-specific DNA binding; P:regulation of transcription, DNA-templated; F:sequence-specific DNA binding		IPR004827 (SMART); G3DSA:1.20.5.170 (GENE3D); IPR004827 (PFAM); IPR004827 (PROSITE_PROFILES); SSF57959 (SUPERFAMILY)
CGI_10007670	PREDICTED: uncharacterized protein LOC105346062	840	1
CGI_10001246	probable E3 ubiquitin- ligase RNF144A	687	0.578	F:ubiquitin-protein transferase activity; P:proteolysis; F:hydrolase activity; P:protein ubiquitination		IPR002867 (PFAM); PTHR11685:SF129 (PANTHER); IPR031127 (PANTHER); SSF57850 (SUPERFAMILY); SSF57850 (SUPERFAMILY)
CGI_10026316	inhibitor of apoptosis	1086	0.4845	F:zinc ion binding		IPR001370 (SMART); IPR001370 (G3DSA:1.10.1170.GENE3D); IPR001370 (PFAM); PF13920 (PFAM); IPR013083 (G3DSA:3.30.40.GENE3D); PTHR10044:SF128 (PANTHER); PTHR10044 (PANTHER); IPR001370 (PROSITE_PROFILES); IPR001841 (PROSITE_PROFILES); SSF57924 (SUPERFAMILY)
CGI_10014728	c-binding -like	1569	0.4985	F:calcium ion binding; F:extracellular matrix structural constituent; C:proteinaceous extracellular matrix
CGI_10002341	ATP-binding cassette sub-family F member 2	1728	0.8025	F:ATPase activity; F:ATP binding; P:metabolic process; P:single-organism transport; P:cellular process; F:hydrolase activity, acting on acid anhydrides, catalyzing transmembrane movement of substances	EC:3.6.1.3	IPR003593 (SMART); IPR003439 (PFAM); IPR027417 (G3DSA:3.40.50.GENE3D); IPR032781 (PFAM); PTHR19211:SF15 (PANTHER); PTHR19211 (PANTHER); IPR003439 (PROSITE_PROFILES); IPR027417 (SUPERFAMILY); IPR027417 (SUPERFAMILY)
CGI_10006477	E3 ubiquitin- ligase RNF213-like	1887	0.733	F:ATPase activity; F:ubiquitin-protein transferase activity; F:ATP binding; F:metal ion binding; P:protein ubiquitination	EC:3.6.1.3
CGI_10015444	chitin synthase	1050	0.7145	F:nucleotide binding; F:transferase activity, transferring hexosyl groups; P:metabolic process; C:integral component of membrane; F:hydrolase activity
CGI_10013925	cis-aconitate decarboxylase	1545	0.6855	P:metabolic process; F:lyase activity
CGI_10026040	hypothetical protein CGI_10026040	237	0.8038			no IPS match
CGI_10026836	melatonin receptor type 1B-like	888	0.722	F:G-protein coupled receptor activity; P:G-protein coupled receptor signaling pathway; C:integral component of membrane
CGI_10013774	poly [ADP-ribose] polymerase 12-like [Crassostrea gigas]	825	0.547	F:metal ion binding
CGI_10006931	peripheral myelin 22-like [Crassostrea gigas]	534	0.6874	P:methionine biosynthetic process; P:pteridine-containing compound metabolic process; F:methionine synthase activity; F:zinc ion binding; F:cobalamin binding; C:integral component of membrane; C:intracellular; F:S-adenosylmethionine-homocysteine S-methyltransferase activity; P:methylation	EC:2.1.1.13
CGI_10006233	NFX1-type zinc finger-containing 1	432	0.6245	F:binding
CGI_10023414	UPF0515 C19orf66 homolog isoform X2	630	0.9033
CGI_10002342	hypothetical protein CGI_10002342	219	1			no IPS match
CGI_10016992	Helicase-like transcription factor	1413	0.675	F:hydrolase activity, acting on acid anhydrides, in phosphorus-containing anhydrides; F:ion binding		IPR025874 (PFAM)
CGI_10023476	cyclic GMP-AMP synthase-like isoform X1 [Crassostrea gigas]	1905	0.6855	C:membrane; C:integral component of membrane		IPR015880 (SMART); IPR024810 (SMART); IPR024810 (PFAM); PTHR10656 (PANTHER)
CGI_10005453	E3 ubiquitin- ligase RNF213-like	2808	0.725	F:ATPase activity; F:ubiquitin-protein transferase activity; F:zinc ion binding; P:protein ubiquitination	EC:3.6.1.3	PTHR22605 (PANTHER)
CGI_10013924	phytanoyl- dioxygenase domain-containing 1-like	765	0.693	F:dioxygenase activity; P:lipid metabolic process; P:oxidation-reduction process
CGI_10007361	E3 ubiquitin- ligase RNF213-like	2157	0.6685	F:ATPase activity; F:ubiquitin-protein transferase activity; F:zinc ion binding; P:protein ubiquitination	EC:3.6.1.3
CGI_10027445	helicase with zinc finger domain 2-like isoform X1 [Crassostrea gigas]	1569	0.7905	F:ligand-dependent nuclear receptor transcription coactivator activity; P:regulation of nucleic acid-templated transcription		IPR027417 (G3DSA:3.40.50.GENE3D); IPR027417 (G3DSA:3.40.50.GENE3D); PF13086 (PFAM); PF13087 (PFAM); PTHR10887 (PANTHER); PTHR10887:SF369 (PANTHER); IPR027417 (SUPERFAMILY)
CGI_10026674	DBH-like monooxygenase 1 [Crassostrea gigas]	1707	0.6165	F:copper ion binding; F:oxidoreductase activity, acting on paired donors, with incorporation or reduction of molecular oxygen, reduced ascorbate as one donor, and incorporation of one atom of oxygen; C:integral component of membrane; P:oxidation-reduction process	EC:1.14.17
CGI_10028806	[Nematostella vectensis]	1893	0.828	P:ventricular system development; P:immune response; P:movement of cell or subcellular component; C:membrane; F:tumor necrosis factor receptor binding; P:pattern specification process		IPR026224 (PRINTS); IPR008983 (G3DSA:2.60.120.GENE3D); IPR008983 (G3DSA:2.60.120.GENE3D); IPR006052 (PFAM); PF14913 (PFAM); IPR007529 (PFAM); PTHR31921:SF1 (PANTHER); IPR026224 (PANTHER); IPR006052 (PROSITE_PROFILES); IPR008983 (SUPERFAMILY)
CGI_10008090	tripartite motif-containing 2-like	1359	0.5055	F:zinc ion binding; C:intracellular		IPR001841 (SMART); IPR011042 (G3DSA:2.120.10.GENE3D); IPR013083 (G3DSA:3.30.40.GENE3D); IPR018957 (PFAM); IPR033569 (PTHR24103:PANTHER); PTHR24103 (PANTHER); IPR001841 (PROSITE_PROFILES); IPR000315 (PROSITE_PROFILES); SSF101898 (SUPERFAMILY); SSF57850 (SUPERFAMILY)
CGI_10019816	PREDICTED: uncharacterized protein LOC105338148	588	0.7123			no IPS match
CGI_10007171	von Willebrand factor type EGF and pentraxin domain-containing 1-like	6804	0.614	F:calcium ion binding; C:integral component of membrane		IPR000884 (SMART); IPR011641 (SMART); IPR001881 (SMART); IPR000436 (SMART); IPR000742 (SMART); G3DSA:2.10.70.10 (GENE3D); IPR003410 (PFAM); IPR013320 (G3DSA:2.60.120.GENE3D); G3DSA:2.10.25.10 (GENE3D); IPR000884 (PFAM); G3DSA:2.20.100.10 (GENE3D); G3DSA:2.10.25.10 (GENE3D); IPR000742 (PFAM); IPR000436 (PFAM); G3DSA:2.10.70.10 (GENE3D); G3DSA:2.10.25.10 (GENE3D); IPR011641 (PFAM); PTHR24050 (PANTH…
CGI_10001635	Interferon-induced 44	1131	0.961	F:GTP binding		IPR006571 (PFAM); IPR027417 (G3DSA:3.40.50.GENE3D); IPR006073 (PFAM); PTHR14241 (PANTHER); IPR027417 (SUPERFAMILY)
CGI_10010240	Chorion peroxidase	2547	0.6935	F:peroxidase activity; P:response to oxidative stress; P:cellular oxidant detoxification; P:oxidation-reduction process; F:heme binding	EC:1.11.1.7	IPR019791 (PRINTS); IPR019791 (G3DSA:1.10.640.GENE3D); IPR019791 (PFAM); PTHR11475 (PANTHER); IPR019791 (PROSITE_PROFILES); IPR010255 (SUPERFAMILY)
CGI_10020600	PREDICTED: uncharacterized protein LOC105319064 isoform X2	708	1			no IPS match
CGI_10002396	Basic leucine zipper transcriptional factor ATF-like 3	447	0.7145	F:transcription factor activity, sequence-specific DNA binding; F:sequence-specific DNA binding; P:regulation of transcription from RNA polymerase II promoter		IPR000837 (PRINTS); IPR004827 (SMART); G3DSA:1.20.5.170 (GENE3D); IPR004827 (PFAM); IPR000837 (PANTHER); IPR004827 (PROSITE_PROFILES); SSF57959 (SUPERFAMILY)
CGI_10025227	activator of 90 kDa heat shock ATPase homolog 1	1035	0.6955	P:positive regulation of ATPase activity; F:chaperone binding; F:ATPase activator activity; P:response to stress
CGI_10005211	kinesin KIF13A	1425	0.642	F:growth factor activity; C:extracellular region; P:growth		IPR029309 (PFAM); PTHR14694 (PANTHER); PTHR14694:SF3 (PANTHER); SSF54001 (SUPERFAMILY)
CGI_10006075	Proline-rich transmembrane 1	840	0.6985	P:response to biotic stimulus; C:integral component of membrane
CGI_10006476	E3 ubiquitin- ligase RNF213-like	5856	0.6595	F:ATPase activity; F:ubiquitin-protein transferase activity; F:ion binding; P:protein ubiquitination	EC:3.6.1.3
CGI_10010968	poly [ADP-ribose] polymerase 12-like [Crassostrea gigas]	675	0.5885	F:GTP binding; F:metal ion binding		IPR000571 (PROSITE_PROFILES)
CGI_10024072	interferon-induced 44-like [Crassostrea gigas]	1413	0.7695	F:GTP binding
CGI_10010038	lysophosphatidic acid receptor 4-like [Lingula anatina]	1557	0.7065	F:G-protein coupled receptor activity; P:G-protein coupled receptor signaling pathway; C:integral component of membrane
CGI_10013745	tripartite motif-containing 2-like	1119	0.6705	F:zinc ion binding; P:metabolic process; C:intracellular; F:ligase activity
CGI_10022759	stromal cell-derived factor 2-like	585	0.8005	P:cell wall mannoprotein biosynthetic process; P:multicellular organism development; P:regulation of endoplasmic reticulum unfolded protein response; C:dolichyl-phosphate-mannose-protein mannosyltransferase complex; P:protein O-linked mannosylation; P:chain elongation of O-linked mannose residue; F:dolichyl-phosphate-mannose-protein mannosyltransferase activity	EC:2.4.1.109	IPR016093 (SMART); IPR016093 (PFAM); G3DSA:2.80.10.50 (GENE3D); IPR027005 (PANTHER); IPR016093 (PROSITE_PROFILES); IPR016093 (PROSITE_PROFILES); IPR016093 (PROSITE_PROFILES); IPR016093 (SUPERFAMILY)
CGI_10002823	heat shock 70	1848	0.8475	F:ATP binding
CGI_10026865	sex peptide receptor-like [Priapulus caudatus]	1242	0.5625	F:G-protein coupled receptor activity; P:G-protein coupled receptor signaling pathway; C:integral component of membrane
CGI_10004838	NF-kappa-B inhibitor alpha-like isoform X1	159	1
CGI_10026568	sodium- and chloride-dependent glycine transporter 2-like	1959	0.689	P:transmembrane transport; F:glycine transmembrane transporter activity; F:sodium:amino acid symporter activity; C:integral component of membrane; P:glycine transport; C:cell part; P:synaptic transmission		IPR000175 (PRINTS); IPR000175 (PFAM); IPR000175 (PANTHER); IPR000175 (PROSITE_PROFILES); SSF161070 (SUPERFAMILY)
CGI_10003267	toll-like receptor 13 [Coturnix japonica]	2199	0.687	P:toll-like receptor 21 signaling pathway; C:integral component of membrane; C:endosome membrane; F:binding; P:defense response to bacterium
CGI_10012656	chitin synthase	4080	0.7125	C:myosin complex; F:ATP binding; P:metabolic process; C:integral component of membrane; F:chitin synthase activity; F:motor activity	EC:2.4.1.16	PF03142 (PFAM); IPR029044 (G3DSA:3.90.550.GENE3D); IPR004835 (PANTHER); PTHR22914:SF8 (PANTHER); IPR029044 (SUPERFAMILY)
CGI_10018436	Tudor domain-containing 7	3609	0.5895	P:single-organism process
CGI_10017255	heat shock 70 kDa 4-like	1764	0.7515	F:ATP binding		IPR013126 (PRINTS); G3DSA:3.30.420.40 (GENE3D); G3DSA:3.30.30.30 (GENE3D); IPR013126 (PFAM); G3DSA:3.30.420.40 (GENE3D); IPR029047 (G3DSA:2.60.34.GENE3D); G3DSA:3.90.640.10 (GENE3D); PTHR19375 (PANTHER); PTHR19375:SF78 (PANTHER); SSF53067 (SUPERFAMILY); SSF53067 (SUPERFAMILY); IPR029047 (SUPERFAMILY)
CGI_10017030	leucine--tRNA cytoplasmic-like [Aplysia californica]	3579	0.8015	F:ATP binding; P:leucyl-tRNA aminoacylation; F:leucine-tRNA ligase activity; P:regulation of translational fidelity; F:aminoacyl-tRNA editing activity; C:cytosol	EC:6.1.1.4	IPR009080 (G3DSA:1.10.730.GENE3D); IPR002300 (PFAM); IPR004493 (TIGRFAM); IPR009008 (G3DSA:3.90.740.GENE3D); IPR014729 (G3DSA:3.40.50.GENE3D); IPR013155 (PFAM); PTHR11946:SF51 (PANTHER); PTHR11946 (PANTHER); IPR009080 (SUPERFAMILY); SSF52374 (SUPERFAMILY); SSF52374 (SUPERFAMILY); IPR009008 (SUPERFAMILY)
CGI_10014140	hemagglutinin amebocyte aggregation factor-like	513	0.7905	F:catalytic activity; P:metabolic process
CGI_10005452	E3 ubiquitin- ligase RNF213-like	16599	0.7165	F:ATPase activity; F:ubiquitin-protein transferase activity; F:zinc ion binding; P:protein ubiquitination	EC:3.6.1.3	IPR003593 (SMART); IPR027417 (G3DSA:3.40.50.GENE3D); IPR013083 (G3DSA:3.30.40.GENE3D); IPR027417 (G3DSA:3.40.50.GENE3D); PTHR22605 (PANTHER); IPR031248 (PTHR22605:PANTHER); IPR001841 (PROSITE_PROFILES); IPR027417 (SUPERFAMILY); SSF57850 (SUPERFAMILY); IPR027417 (SUPERFAMILY)
CGI_10007459	surfeit locus 2	885	0.6875	C:cell part
CGI_10000167	astacin-like metalloprotease toxin 1	321	0.6055	P:proteolysis; F:metalloendopeptidase activity	EC:3.4.24	IPR001506 (PFAM); IPR024079 (G3DSA:3.40.390.GENE3D); SSF55486 (SUPERFAMILY)
CGI_10020051	cartilage matrix -like	987	0.6575	C:collagen trimer; F:calcium ion binding		PR00453 (PRINTS); PR00010 (PRINTS); IPR002035 (SMART); IPR001881 (SMART); IPR000742 (SMART); IPR002035 (PFAM); IPR000742 (PFAM); G3DSA:2.10.25.10 (GENE3D); IPR002035 (G3DSA:3.40.50.GENE3D); G3DSA:2.10.25.10 (GENE3D); PTHR11132 (PANTHER); IPR000742 (PROSITE_PROFILES); IPR002035 (PROSITE_PROFILES); IPR002035 (SUPERFAMILY); SSF57196 (SUPERFAMILY)
CGI_10022464	nidogen and EGF-like domain-containing 1	3837	0.754	P:cell-matrix adhesion; C:integral component of membrane
CGI_10003997	von Willebrand factor D and EGF domain-containing -like	1386	0.6895	F:ATP binding; F:zinc ion binding; F:ATPase activity, coupled to transmembrane movement of substances; P:transmembrane transport; P:proteolysis; C:integral component of membrane; F:metalloendopeptidase activity	EC:3.4.24
CGI_10013879	vesicular glutamate transporter 2	1452	0.623	P:transmembrane transport; C:integral component of membrane
CGI_10006647	---NA---	195				no IPS match
CGI_10007563	dnaJ homolog subfamily C member 3-like	1356	0.776			IPR001623 (PRINTS); IPR001623 (SMART); IPR019734 (SMART); IPR001623 (PFAM); IPR011990 (G3DSA:1.25.40.GENE3D); IPR011990 (G3DSA:1.25.40.GENE3D); IPR001623 (G3DSA:1.10.287.GENE3D); IPR011990 (G3DSA:1.25.40.GENE3D); IPR019734 (PFAM); PF14559 (PFAM); PTHR24074:SF10 (PANTHER); PTHR24074 (PANTHER); IPR001623 (PROSITE_PROFILES); IPR013026 (PROSITE_PROFILES); IPR019734 (PROSITE_PROFILES); IPR011990 (SUPE…
CGI_10027843	ATP-binding cassette sub-family F member 3	2121	0.806	F:ATPase activity; F:ATP binding; P:metabolic process	EC:3.6.1.3	IPR003593 (SMART); IPR003439 (PFAM); IPR027417 (G3DSA:3.40.50.GENE3D); IPR032781 (PFAM); PTHR19211 (PANTHER); PTHR19211:SF45 (PANTHER); IPR003439 (PROSITE_PROFILES); IPR027417 (SUPERFAMILY); IPR027417 (SUPERFAMILY)
CGI_10002950	girdin-like isoform X7	789	0.634
CGI_10005278	NC domain [Burkholderia MR1]	657	0.6228	P:metabolic process; C:membrane; C:integral component of membrane; F:hydrolase activity
CGI_10018420	CST complex subunit partial	672	0.6525	C:CST complex; F:single-stranded DNA binding		IPR029146 (PFAM); PTHR33905:SF1 (PANTHER); PTHR33905 (PANTHER)
CGI_10014034	probable ATP-dependent RNA helicase DHX58	3057	0.625	F:DNA binding; F:ATP binding; P:metabolic process; F:helicase activity; P:regulation of apoptotic process
CGI_10003310	isoleucine--tRNA cytoplasmic	4386	0.7945	P:isoleucyl-tRNA aminoacylation; F:ATP binding; F:isoleucine-tRNA ligase activity; C:cytoplasm; P:regulation of translational fidelity; C:integral component of membrane; F:aminoacyl-tRNA editing activity; C:membrane-bounded organelle	EC:6.1.1.5
CGI_10011188	TNFAIP3-interacting 2 isoform X2	1950	0.5495	P:establishment of protein localization; P:mitotic cytokinesis; P:cell separation after cytokinesis; C:midbody		IPR032419 (PFAM); G3DSA:1.20.5.990 (GENE3D); PTHR31882:SF6 (PANTHER); PTHR31882 (PANTHER)
CGI_10024612	hypothetical protein CGI_10024612	753	0.661	P:signal transduction		IPR000157 (PFAM); IPR000157 (G3DSA:3.40.50.GENE3D); PTHR23097 (PANTHER); IPR000157 (SUPERFAMILY)
CGI_10010114	cell death abnormality 1-like	396	0.7511	C:membrane; C:integral component of membrane; P:phosphorylation; F:kinase activity		no IPS match
CGI_10024071	interferon-induced 44-like [Crassostrea gigas]	1416	0.768	F:GTP binding
CGI_10023856	non-canonical poly(A) RNA polymerase PAPD5-like	2019	0.753	F:nucleotidyltransferase activity; P:metabolic process
CGI_10016991	helicase-like transcription factor	342	0.5775	F:ATPase activity; F:nucleic acid binding; F:ubiquitin-protein transferase activity; F:ATP binding; F:zinc ion binding; F:metal ion binding; P:metabolic process; F:hydrolase activity, acting on acid anhydrides, in phosphorus-containing anhydrides; F:helicase activity; P:protein ubiquitination		no IPS match
CGI_10017352	Tripartite motif-containing 2	1713	0.599	F:zinc ion binding; P:signal transduction; C:membrane; C:integral component of membrane; C:intracellular		IPR011042 (G3DSA:2.120.10.GENE3D); SSF63829 (SUPERFAMILY)
CGI_10021734	chorion peroxidase-like	1776	0.7085	F:peroxidase activity; P:response to oxidative stress; P:cellular oxidant detoxification; P:oxidation-reduction process; F:heme binding	EC:1.11.1.7
CGI_10014448	transcription factor ETV7-like isoform X1 [Crassostrea gigas]	1362	0.695	C:nucleus; F:transcription factor activity, sequence-specific DNA binding; P:regulation of transcription, DNA-templated; F:sequence-specific DNA binding
CGI_10003300	NFX1-type zinc finger-containing 1-like	1155	0.6585	C:nucleus; F:transcription factor activity, sequence-specific DNA binding; F:zinc ion binding; P:regulation of transcription, DNA-templated; F:poly(A) RNA binding		PTHR10887 (PANTHER); PTHR10887:SF379 (PANTHER)
CGI_10028286	kielin chordin	711	0.6375	F:peptidase inhibitor activity; P:negative regulation of peptidase activity		IPR006150 (SMART); IPR008037 (PFAM); IPR028150 (PFAM); SSF57603 (SUPERFAMILY); IPR008037 (SUPERFAMILY)
CGI_10008215	hypothetical protein CGI_10008215	561	1			no IPS match
CGI_10023093	PREDICTED: uncharacterized protein LOC105330599 [Crassostrea gigas]	1140	1	C:integral component of membrane
CGI_10017630	signal transducer and activator of transcription 5B [Ceratosolen solmsi marchali]	1458	0.5975	C:nucleus; F:transcription factor activity, sequence-specific DNA binding; P:signal transduction; P:regulation of transcription, DNA-templated; F:signal transducer activity
CGI_10027907	Exonuclease 3 -5 domain-containing 1	1371	0.692	F:nucleic acid binding; F:3'-5' exonuclease activity; P:nucleic acid phosphodiester bond hydrolysis		IPR002562 (SMART); IPR002562 (PFAM); IPR012337 (G3DSA:3.30.420.GENE3D); PTHR12124:SF49 (PANTHER); PTHR12124 (PANTHER); IPR012337 (SUPERFAMILY)
CGI_10023586	hypothetical protein CGI_10023586	264	1			no IPS match
CGI_10007364	E3 ubiquitin- ligase RNF213-like	4773	0.7505	F:ATPase activity; F:ubiquitin-protein transferase activity; F:zinc ion binding; P:protein ubiquitination	EC:3.6.1.3
CGI_10004601	MAM and LDL-receptor class A domain-containing 1-like	1131	0.604	F:metal ion binding; C:membrane; F:peptidase activity
CGI_10000713	pyridoxal phosphate phosphatase PHOSPHO2-like isoform X2 [Solenopsis invicta]	744	0.673	F:phosphatase activity; P:dephosphorylation	EC:3.1.3.41	IPR016965 (PIRSF); IPR006384 (TIGRFAM); IPR016965 (PFAM); IPR023214 (G3DSA:3.40.50.GENE3D); IPR006383 (TIGRFAM); PTHR20889 (PANTHER); IPR023214 (SUPERFAMILY)
CGI_10020283	probable E3 ubiquitin- ligase HERC1	5580	0.793	F:ubiquitin-protein transferase activity; F:ligase activity; P:protein ubiquitination
CGI_10002382	E3 ubiquitin- ligase DTX3L	3780	0.7435	C:nucleus; F:zinc ion binding; P:cellular macromolecule metabolic process; F:catalytic activity; P:single-organism cellular process; P:cellular response to DNA damage stimulus; P:primary metabolic process; P:single-organism metabolic process
CGI_10020129	glycine-rich domain-containing 2-like [Biomphalaria glabrata]	1428	0.66			IPR009836 (PFAM); PTHR34365:SF2 (PANTHER); PTHR34365 (PANTHER)
CGI_10006478	E3 ubiquitin- ligase RNF213-like	2469	0.544	F:ATPase activity; F:ubiquitin-protein transferase activity; P:protein ubiquitination	EC:3.6.1.3
CGI_10020161	Ubiquitin-conjugating enzyme E2 R2	2526	0.9095	F:ATP binding; P:DNA repair; P:nucleic acid phosphodiester bond hydrolysis; F:ubiquitin protein ligase activity; P:proteasome-mediated ubiquitin-dependent protein catabolic process; F:ubiquitin protein ligase binding; F:ubiquitin conjugating enzyme activity; P:protein K48-linked ubiquitination; C:cytoplasm; F:nuclease activity; P:protein monoubiquitination; F:ligase activity	EC:3.1	IPR006084 (PRINTS); SM00212 (SMART); IPR029060 (G3DSA:3.40.50.GENE3D); IPR000608 (PFAM); IPR016135 (G3DSA:3.10.110.GENE3D); PF12813 (PFAM); PTHR24067 (PANTHER); PTHR24067:SF4 (PANTHER); IPR000608 (PROSITE_PROFILES); IPR029060 (SUPERFAMILY); IPR016135 (SUPERFAMILY)
CGI_10005690	Cysteine-rich with EGF-like domain 2	1059	0.6855	F:calcium ion binding		IPR006212 (SMART); IPR000742 (SMART); IPR001881 (SMART); G3DSA:2.10.25.10 (GENE3D); IPR002049 (PFAM); G3DSA:2.10.25.10 (GENE3D); G3DSA:2.10.25.10 (GENE3D); IPR001881 (PFAM); PTHR24044 (PANTHER); PTHR24044:SF273 (PANTHER); IPR000742 (PROSITE_PROFILES); IPR009030 (SUPERFAMILY)
CGI_10027453	NFX1-type zinc finger-containing 1-like	993	1			no IPS match
CGI_10010457	Ddx58 partial	1323	0.64	C:intracellular organelle; P:metabolic process; F:double-stranded DNA binding; F:helicase activity; P:regulation of immune system process; P:cellular process; F:ATP binding; F:protein binding; P:regulation of cellular process; F:double-stranded RNA binding; P:positive regulation of interferon-beta production; P:response to exogenous dsRNA; P:innate immune response; C:membrane; F:single-stranded R…
CGI_10022697	Transcription termination factor 2	3258	0.6845	F:ATP binding		IPR014001 (SMART); IPR001650 (SMART); IPR027417 (G3DSA:3.40.50.GENE3D); IPR027417 (G3DSA:3.40.50.GENE3D); IPR001650 (PFAM); IPR000330 (PFAM); PTHR10799 (PANTHER); PTHR10799:SF573 (PANTHER); IPR001650 (PROSITE_PROFILES); IPR014001 (PROSITE_PROFILES); IPR027417 (SUPERFAMILY); IPR027417 (SUPERFAMILY)
CGI_10011219	hypothetical protein CGI_10011219	405	0.6495	C:membrane; C:integral component of membrane		PTHR35378 (PANTHER)
CGI_10018035	Collagen alpha-5(IV) chain	1512	0.719	F:nucleotide binding; F:RNA binding; C:collagen trimer; C:integral component of membrane; P:RNA processing; F:extracellular matrix structural constituent		no IPS match
CGI_10010182	cAMP-responsive element-binding -like 2	1053	0.8575	F:transcription factor activity, sequence-specific DNA binding; P:regulation of transcription, DNA-templated; F:sequence-specific DNA binding		G3DSA:1.20.5.170 (GENE3D); IPR004827 (PFAM); PTHR21051 (PANTHER); PTHR21051:SF4 (PANTHER); SSF57959 (SUPERFAMILY)
CGI_10009255	Sperm-associated antigen 1	3495	0.5795	C:microtubule cytoskeleton; C:cytoplasm; C:nucleoplasm
CGI_10008815	eukaryotic translation initiation factor 2 subunit 3	1422	0.915	F:GTP binding; F:translation initiation factor activity; P:formation of translation preinitiation complex; F:GTPase activity; C:intracellular
CGI_10028125	E3 SUMO- ligase 2-like	7674	0.585	F:zinc ion binding; P:protein sumoylation; P:negative regulation of glucokinase activity; C:mitochondrion; P:NLS-bearing protein import into nucleus; F:Ran GTPase binding; C:microtubule associated complex; F:ligase activity; P:regulation of gluconeogenesis involved in cellular glucose homeostasis; C:nuclear pore		IPR000156 (SMART); IPR001876 (SMART); IPR000156 (PFAM); IPR001876 (PFAM); IPR011990 (G3DSA:1.25.40.GENE3D); IPR011993 (G3DSA:2.30.29.GENE3D); PTHR23138:SF98 (PANTHER); PTHR23138 (PANTHER); IPR001876 (PROSITE_PROFILES); IPR000156 (PROSITE_PROFILES); IPR011993 (SUPERFAMILY); IPR011993 (SUPERFAMILY); IPR011993 (SUPERFAMILY); IPR001876 (SUPERFAMILY); IPR011993 (SUPERFAMILY)
CGI_10022973	probable ATP-dependent RNA helicase DDX58	3783	0.584	F:DNA binding; F:ATP binding; P:metabolic process; F:helicase activity; P:positive regulation of cytokine production		IPR001650 (SMART); IPR014001 (SMART); IPR006935 (PFAM); IPR027417 (G3DSA:3.40.50.GENE3D); IPR021673 (PFAM); IPR001650 (PFAM); IPR031964 (PFAM); IPR011029 (G3DSA:1.10.533.GENE3D); IPR027417 (G3DSA:3.40.50.GENE3D); PTHR14074 (PANTHER); IPR001650 (PROSITE_PROFILES); IPR014001 (PROSITE_PROFILES); IPR027417 (SUPERFAMILY); IPR027417 (SUPERFAMILY)
CGI_10023930	glutathione gamma-glutamylcysteinyltransferase 1-like [Octopus bimaculoides]	1374	0.647	P:phytochelatin biosynthetic process; F:glutathione gamma-glutamylcysteinyltransferase activity; F:metal ion binding; P:response to metal ion	EC:2.3.2.15	IPR007719 (PFAM); PTHR33447:SF2 (PANTHER); PTHR33447 (PANTHER); IPR007719 (PROSITE_PROFILES); SSF54001 (SUPERFAMILY)
CGI_10008352	GTPase IMAP family member 4-like	1569	0.689	F:GTP binding		IPR027417 (G3DSA:3.40.50.GENE3D); IPR006703 (PFAM); PTHR10903 (PANTHER); IPR006703 (PROSITE_PROFILES); IPR027417 (SUPERFAMILY); IPR027417 (SUPERFAMILY)
CGI_10027982	E3 ubiquitin- ligase TRIM33-like isoform X2 [Crassostrea gigas]	1395	0.684	F:zinc ion binding; P:metabolic process; C:intracellular; F:ligase activity
CGI_10027790	Prostaglandin E2 receptor EP4 subtype	783	0.7805	F:G-protein coupled receptor activity; P:G-protein coupled receptor signaling pathway; C:integral component of membrane		IPR008365 (PRINTS); IPR000276 (PRINTS); G3DSA:1.20.1070.10 (GENE3D); IPR000276 (PFAM); IPR008365 (PANTHER); IPR017452 (PROSITE_PROFILES); SSF81321 (SUPERFAMILY)
CGI_10013429	Tripartite motif-containing 2	3207	0.7545	F:zinc ion binding; C:intracellular		IPR000315 (SMART); IPR011042 (G3DSA:2.120.10.GENE3D); PTHR24103:SF314 (PANTHER); PTHR24103 (PANTHER); IPR013017 (PROSITE_PROFILES); IPR000315 (PROSITE_PROFILES); SSF57845 (SUPERFAMILY); SSF101898 (SUPERFAMILY)
CGI_10011954	Interferon-induced 44	1017	0.9515	F:GTP binding		IPR027417 (G3DSA:3.40.50.GENE3D); IPR006073 (PFAM); PTHR14241 (PANTHER); IPR027417 (SUPERFAMILY)
CGI_10015118	T-complex 1 subunit epsilon-like	2037	0.915	F:ATP binding; C:cytoplasm; F:unfolded protein binding; P:protein folding
CGI_10027911	sacsin-like	948	0.6345	P:RNA processing		IPR007842 (PFAM); IPR001623 (G3DSA:1.10.287.GENE3D); G3DSA:1.20.120.330 (GENE3D); PTHR15600 (PANTHER); PTHR15600:SF28 (PANTHER); SSF81593 (SUPERFAMILY); IPR001623 (SUPERFAMILY)
CGI_10024594	thioredoxin 1	867	0.794	C:cell; F:protein disulfide oxidoreductase activity; P:glycerol ether metabolic process; P:cell redox homeostasis; P:oxidation-reduction process		PR00421 (PRINTS); IPR012336 (G3DSA:3.40.30.GENE3D); IPR013766 (PFAM); IPR010400 (G3DSA:2.60.120.GENE3D); IPR010400 (PFAM); PTHR10438:SF284 (PANTHER); IPR005746 (PANTHER); IPR013766 (PROSITE_PROFILES); IPR010400 (PROSITE_PROFILES); IPR012336 (SUPERFAMILY); IPR008979 (SUPERFAMILY)
CGI_10025730	glucose-regulated 94	3249	0.872	F:ATP binding; C:integral component of membrane; F:unfolded protein binding; P:protein folding; P:response to stress		IPR020575 (PRINTS); IPR003594 (SMART); IPR003594 (PFAM); IPR001404 (PFAM); IPR003594 (G3DSA:3.30.565.GENE3D); IPR003594 (G3DSA:3.30.565.GENE3D); PTHR11528:SF54 (PANTHER); IPR001404 (PANTHER); IPR001404 (HAMAP); SSF110942 (SUPERFAMILY); IPR003594 (SUPERFAMILY); IPR020568 (SUPERFAMILY); IPR020568 (SUPERFAMILY); IPR003594 (SUPERFAMILY)
CGI_10028451	placenta-specific gene 8 -like	309	0.9467			IPR006461 (PFAM); IPR006461 (TIGRFAM); PTHR15907 (PANTHER)
CGI_10006083	Multiple epidermal growth factor-like domains 10	1206	0.7141	C:integral component of membrane
CGI_10022051	PREDICTED: uncharacterized protein LOC105345965	420	0.98			IPR008983 (G3DSA:2.60.120.GENE3D); IPR008983 (SUPERFAMILY)
CGI_10009620	poly [ADP-ribose] polymerase 12-like [Coturnix japonica]	1161	0.6765	P:metabolic process; F:NAD+ ADP-ribosyltransferase activity	EC:2.4.2.30
CGI_10024628	organic cation transporter -like	1716	0.6245	P:transmembrane transport; F:transmembrane transporter activity; C:integral component of membrane
CGI_10006224	NFX1-type zinc finger-containing 1	2343	0.6705	F:binding		IPR019528 (PFAM); IPR027417 (G3DSA:3.40.50.GENE3D); PF13086 (PFAM); PF13087 (PFAM); PTHR10887:SF341 (PANTHER); PTHR10887 (PANTHER); IPR027417 (SUPERFAMILY)
CGI_10007434	hypothetical protein CGI_10007434	474	1	C:integral component of membrane		no IPS match
CGI_10001507	Mitochondrial import inner membrane translocase subunit TIM44	942	0.6175	C:mitochondrion; P:transport		PTHR10721:SF1 (PANTHER); PTHR10721 (PANTHER); IPR032710 (SUPERFAMILY)
CGI_10020360	Tripartite motif-containing 2	894	0.6525	F:zinc ion binding; C:intracellular		IPR011042 (G3DSA:2.120.10.GENE3D); SSF101898 (SUPERFAMILY)
CGI_10027104	cysteine--tRNA cytoplasmic-like	1248	0.7445	F:ATP binding; P:tRNA aminoacylation for protein translation; F:aminoacyl-tRNA ligase activity	EC:6.1.1
CGI_10008241	C-type lectin domain family member A-like	1053	0.8867	C:integral component of membrane
CGI_10028856	alanine--tRNA cytoplasmic	2898	0.792	P:neuromuscular process; F:tRNA binding; P:translational initiation; P:translational elongation; P:skin development; C:eukaryotic translation elongation factor 1 complex; P:tRNA modification; F:GTP binding; F:translation initiation factor activity; F:ATP binding; P:regulation of cellular process; F:translation elongation factor activity; F:alanine-tRNA ligase activity; P:alanyl-tRNA aminoacylatio…	EC:6.1.1.7	IPR002318 (PRINTS); IPR012947 (SMART); IPR002318 (TIGRFAM); IPR012947 (PFAM); G3DSA:3.30.930.10 (GENE3D); IPR003156 (PFAM); G3DSA:2.40.30.10 (GENE3D); IPR018164 (PFAM); PTHR11777 (PANTHER); PTHR11777:SF9 (PANTHER); IPR023033 (HAMAP); IPR018165 (PROSITE_PROFILES); SSF55681 (SUPERFAMILY); IPR018163 (SUPERFAMILY); IPR018162 (SUPERFAMILY); IPR009000 (SUPERFAMILY)
CGI_10019870	---NA---	228				no IPS match
CGI_10025870	MAM and LDL-receptor class A domain-containing 1-like	3399	0.7015	F:metal ion binding; P:proteolysis; C:integral component of membrane; F:metalloendopeptidase activity	EC:3.4.24
CGI_10009013	CREBRF homolog [Halyomorpha halys]	2289	0.752	F:transcription factor activity, sequence-specific DNA binding; P:regulation of transcription, DNA-templated; F:sequence-specific DNA binding		G3DSA:1.20.5.170 (GENE3D); PTHR21552 (PANTHER)
CGI_10005238	immediate early response gene 5	936	0.7875
CGI_10015030	Poly [ADP-ribose] polymerase 14	3018	0.5675	P:metabolic process; F:NAD+ ADP-ribosyltransferase activity	EC:2.4.2.30
CGI_10011513	Baculoviral IAP repeat-containing 7-B	1140	0.536	F:zinc ion binding
CGI_10012482	poly [ADP-ribose] polymerase 15-like [Crassostrea gigas]	4659	0.5735	P:metabolic process; F:NAD+ ADP-ribosyltransferase activity	EC:2.4.2.30
CGI_10015018	solute carrier family 26 member 6-like [Lingula anatina]	1845	0.6745	F:secondary active sulfate transmembrane transporter activity; C:integral component of membrane; P:sulfate transmembrane transport
CGI_10022902	ankyrin repeat [Trichomonas vaginalis G3]	4077	0.4775	P:phosphorylation; F:kinase activity		IPR002110 (SMART); IPR020683 (G3DSA:1.25.40.GENE3D); IPR020683 (G3DSA:1.25.40.GENE3D); IPR020683 (G3DSA:1.25.40.GENE3D); IPR027417 (G3DSA:3.40.50.GENE3D); IPR020683 (G3DSA:1.25.40.GENE3D); IPR002110 (PFAM); IPR020683 (G3DSA:1.25.40.GENE3D); PTHR24198 (PANTHER); IPR020683 (PROSITE_PROFILES); IPR002110 (PROSITE_PROFILES); IPR020683 (SUPERFAMILY); IPR027417 (SUPERFAMILY); IPR020683 (SUPERFAMILY); IP…
CGI_10025871	MAM and LDL-receptor class A domain-containing 1-like	642	0.6625	F:zinc ion binding; F:calcium ion binding; C:membrane; P:proteolysis; F:metalloendopeptidase activity	EC:3.4.24
CGI_10019164	FMRFamide receptor-like	1131	0.588	F:G-protein coupled receptor activity; P:G-protein coupled receptor signaling pathway; C:integral component of membrane
CGI_10024968	hypothetical protein CGI_10024968	564	0.94
CGI_10011081	heat shock 60	1677	0.872	F:ATP binding; C:cytoplasm; P:protein refolding
CGI_10028084	temptin-like	627	0.6405	F:oxidoreductase activity, acting on paired donors, with incorporation or reduction of molecular oxygen, reduced ascorbate as one donor, and incorporation of one atom of oxygen; F:copper ion binding; F:catalytic activity; F:pheromone activity; P:oxidation-reduction process; C:extracellular region; F:monooxygenase activity		PTHR34737 (PANTHER)
CGI_10001591	AChain Crystal Structure Of An Inhibitor-bound Syk	690	0.64	P:regulation of MAPK cascade; P:regulation of response to stress; P:transcription factor import into nucleus; F:integrin binding; P:anatomical structure morphogenesis; P:animal organ development; P:positive regulation of transport; P:regulation of vesicle-mediated transport; P:protein phosphorylation; P:single-organism metabolic process; P:leukocyte cell-cell adhesion; P:Fc receptor signaling pat…	EC:2.7.11; EC:2.7.10.2	IPR001245 (PRINTS); PIRSF000654 (PIRSF); G3DSA:1.10.510.10 (GENE3D); IPR001245 (PFAM); G3DSA:3.30.200.20 (GENE3D); PTHR24418 (PANTHER); IPR000719 (PROSITE_PROFILES); IPR011009 (SUPERFAMILY)
CGI_10007952	NFX1-type zinc finger-containing 1-like	6411	0.5495	C:nucleus; F:transcription factor activity, sequence-specific DNA binding; F:zinc ion binding; F:metal ion binding; P:regulation of transcription, DNA-templated		IPR000967 (SMART); PF13087 (PFAM); PF13086 (PFAM); IPR027417 (G3DSA:3.40.50.GENE3D); PTHR10887 (PANTHER); PTHR10887 (PANTHER); PTHR10887:SF341 (PANTHER); PTHR10887:SF341 (PANTHER); PTHR10887:SF341 (PANTHER); PTHR10887 (PANTHER); PTHR10887 (PANTHER); PTHR10887:SF341 (PANTHER); PTHR10887:SF341 (PANTHER); IPR027417 (SUPERFAMILY)
CGI_10026302	CCAAT enhancer binding	912	0.749	F:transcription factor activity, sequence-specific DNA binding; P:transcription, DNA-templated; P:hemopoiesis; P:regulation of transcription, DNA-templated; F:sequence-specific DNA binding		IPR004827 (SMART); IPR004827 (PFAM); G3DSA:1.20.5.170 (GENE3D); IPR031106 (PANTHER); IPR004827 (PROSITE_PROFILES); SSF57959 (SUPERFAMILY)
CGI_10001333	serine--tRNA cytoplasmic	1530	0.8445	F:ATP binding; C:cytoplasm; P:patterning of blood vessels; F:serine-tRNA ligase activity; P:seryl-tRNA aminoacylation	EC:6.1.1.11	IPR002317 (PRINTS); IPR015866 (G3DSA:1.10.287.GENE3D); IPR015866 (PFAM); IPR002314 (PFAM); G3DSA:3.30.930.10 (GENE3D); IPR002317 (TIGRFAM); PTHR11778:SF7 (PANTHER); IPR002317 (PANTHER); IPR006195 (PROSITE_PROFILES); SSF55681 (SUPERFAMILY); IPR010978 (SUPERFAMILY)
CGI_10007830	UNC5C [Bos taurus]	1806	0.504	P:signal transduction; C:integral component of membrane
CGI_10017716	neurotrophin receptor-interacting factor 2-like [Crassostrea gigas]	1920	0.715	F:nucleic acid binding; C:nucleus; F:metal ion binding; P:regulation of transcription, DNA-templated
CGI_10021169	nucleolar RNA helicase 2-like	2016	0.7225	C:nucleus; F:ATP binding; F:RNA binding; P:metabolic process; F:helicase activity
CGI_10016055	Poly [ADP-ribose] polymerase 14	1416	0.619	F:nucleotide binding; F:nucleic acid binding; F:transferase activity, transferring glycosyl groups; P:metabolic process; P:proteolysis; C:membrane; P:cell adhesion; F:transferase activity; F:metalloendopeptidase activity; F:NAD+ ADP-ribosyltransferase activity		IPR002589 (SMART); IPR002589 (PFAM); G3DSA:3.40.220.10 (GENE3D); G3DSA:3.40.220.10 (GENE3D); PTHR14453:SF62 (PANTHER); PTHR14453 (PANTHER); IPR002589 (PROSITE_PROFILES); SSF52949 (SUPERFAMILY); SSF52949 (SUPERFAMILY); SSF52949 (SUPERFAMILY)
CGI_10016804	myosin light chain smooth muscle isoform X4 [Monodelphis domestica]	1263	0.599	P:regulation of response to stress; P:single-organism cellular process; F:protein serine/threonine kinase activity; C:cell projection; P:positive regulation of biological process; C:cytoskeleton; F:protein binding; P:regulation of localization; C:cytoplasm; P:muscle contraction; P:cellular component organization; P:cellular response to stress; P:phosphorylation; P:macroautophagy	EC:2.7.11
CGI_10025253	cholecystokinin receptor-like [Crassostrea gigas]	894	0.605	F:G-protein coupled receptor activity; P:G-protein coupled receptor signaling pathway; C:integral component of membrane
CGI_10008580	Regulator of G- signaling 3 [Crassostrea gigas]	1320	0.779			IPR016137 (PRINTS); IPR016137 (SMART); IPR016137 (PFAM); G3DSA:1.10.167.10 (GENE3D); IPR024066 (G3DSA:1.10.196.GENE3D); PTHR10845 (PANTHER); IPR016137 (PROSITE_PROFILES); IPR016137 (SUPERFAMILY)
CGI_10009641	valine--tRNA ligase-like	3180	0.8265	F:valine-tRNA ligase activity; F:ATP binding; P:valyl-tRNA aminoacylation; P:regulation of translational fidelity; C:integral component of membrane; F:aminoacyl-tRNA editing activity; C:cytosol	EC:6.1.1.9
CGI_10022144	TRAF-type zinc finger domain-containing 1	1644	0.4905	F:zinc ion binding
CGI_10002040	spermidine synthase	900	0.87	F:spermidine synthase activity; F:protein homodimerization activity; P:spermidine biosynthetic process	EC:2.5.1.16	IPR030668 (PIRSF); IPR029063 (G3DSA:3.40.50.GENE3D); IPR001045 (TIGRFAM); PF01564 (PFAM); G3DSA:2.30.140.10 (GENE3D); PTHR11558 (PANTHER); IPR030374 (PROSITE_PROFILES); IPR001045 (HAMAP); IPR029063 (SUPERFAMILY)
CGI_10016395	PEK GCN2 kinase	1398	0.6225	F:translation initiation factor activity; F:ATP binding; P:single-organism cellular process; F:protein serine/threonine kinase activity; P:translational initiation; P:protein phosphorylation	EC:2.7.11
CGI_10018242	hypothetical protein CGI_10018242	789	0.7154
CGI_10010647	heat shock 70	1905	0.9395	F:ATP binding		IPR013126 (PRINTS); G3DSA:3.30.420.40 (GENE3D); G3DSA:3.90.640.10 (GENE3D); IPR013126 (PFAM); G3DSA:3.30.30.30 (GENE3D); IPR029048 (G3DSA:1.20.1270.GENE3D); G3DSA:3.30.420.40 (GENE3D); IPR029047 (G3DSA:2.60.34.GENE3D); PTHR19375:SF152 (PANTHER); PTHR19375 (PANTHER); SSF53067 (SUPERFAMILY); IPR029047 (SUPERFAMILY); IPR029048 (SUPERFAMILY); SSF53067 (SUPERFAMILY)
CGI_10012998	Double-stranded RNA-specific adenosine deaminase	2010	0.6265	P:regulation of macromolecule metabolic process; F:RNA binding; P:multicellular organism development; P:RNA processing; F:adenosine deaminase activity; P:single-organism cellular process; P:negative regulation of cellular process; C:intracellular part; P:immune system process; P:response to stimulus	EC:3.5.4.4	IPR014720 (SMART); IPR002466 (SMART); IPR014720 (G3DSA:3.30.160.GENE3D); IPR014720 (PFAM); IPR002466 (PFAM); PTHR10910:SF90 (PANTHER); PTHR10910 (PANTHER); IPR002466 (PROSITE_PROFILES); IPR014720 (PROSITE_PROFILES); SSF54768 (SUPERFAMILY); SSF54768 (SUPERFAMILY)
CGI_10021468	ATP-binding cassette sub-family F member 1	1590	0.8035	F:ATPase activity; F:ATP binding; P:metabolic process	EC:3.6.1.3	IPR003593 (SMART); IPR003439 (PFAM); IPR027417 (G3DSA:3.40.50.GENE3D); IPR027417 (G3DSA:3.40.50.GENE3D); IPR027417 (G3DSA:3.40.50.GENE3D); PTHR19211:SF14 (PANTHER); PTHR19211 (PANTHER); IPR003439 (PROSITE_PROFILES); IPR027417 (SUPERFAMILY); IPR027417 (SUPERFAMILY)
CGI_10012922	growth arrest and DNA damage-inducible GADD45 gamma-like	372	0.6285	C:nucleus; P:regulation of cell cycle; P:response to stress		IPR004038 (PFAM); IPR024824 (PANTHER)
CGI_10026304	CCAAT enhancer binding	933	0.7635	F:transcription factor activity, sequence-specific DNA binding; P:transcription, DNA-templated; P:regulation of transcription, DNA-templated; F:sequence-specific DNA binding		IPR004827 (SMART); IPR004827 (PFAM); G3DSA:1.20.5.170 (GENE3D); IPR031106 (PANTHER); IPR004827 (PROSITE_PROFILES); SSF57959 (SUPERFAMILY)
CGI_10011541	abscisic acid and environmental stress-inducible -like [Crassostrea gigas]	381	1			no IPS match
CGI_10028641	Rho-related GTP-binding	576	0.656	F:GTP binding; P:small GTPase mediated signal transduction; C:membrane; P:protein transport; C:intracellular		PR00449 (PRINTS); SM00173 (SMART); SM00175 (SMART); SM00174 (SMART); IPR027417 (G3DSA:3.40.50.GENE3D); IPR005225 (TIGRFAM); IPR001806 (PFAM); PTHR24072 (PANTHER); PS51420 (PROSITE_PROFILES); IPR027417 (SUPERFAMILY)
CGI_10020130	hypothetical protein CGI_10020130	1053	0.642			no IPS match
CGI_10026559	PREDICTED: uncharacterized protein LOC105340010	606	0.7422			no IPS match
CGI_10027107	eukaryotic translation initiation factor 3 subunit M	1122	0.7765	F:translation initiation factor activity; P:formation of translation preinitiation complex; C:eukaryotic 43S preinitiation complex; P:cytoplasmic translational initiation; C:eukaryotic 48S preinitiation complex; P:regulation of translational initiation; C:eukaryotic translation initiation factor 3 complex
CGI_10017882	endochitinase A-like [Crassostrea gigas]	1266	0.681	C:viral capsid		IPR004302 (PFAM); PTHR21113 (PANTHER)
CGI_10005237	hypothetical protein CGI_10005237	249	1
CGI_10002226	26S proteasome non-ATPase regulatory subunit 2	2679	0.8895	C:nucleus; P:proteasome-mediated ubiquitin-dependent protein catabolic process; C:proteasome regulatory particle, base subcomplex; P:regulation of catalytic activity; F:endopeptidase activity; P:regulation of protein catabolic process; C:proteasome storage granule; F:enzyme regulator activity		IPR016643 (PIRSF); IPR002015 (PFAM); IPR011989 (G3DSA:1.25.10.GENE3D); PTHR10943 (PANTHER); IPR016024 (SUPERFAMILY)
CGI_10002113	kyphoscoliosis peptidase-like [Crassostrea gigas]	1398	0.5555	C:integral component of membrane		PTHR11039 (PANTHER); PTHR11039:SF43 (PANTHER)
CGI_10005624	hypothetical protein CGI_10005624	1704	0.5615
CGI_10005464	hypothetical protein CGI_10005464	177	0.7742	C:integral component of membrane
CGI_10013279	hypothetical protein CGI_10013279	264	1
CGI_10008546	excitatory amino acid transporter [Strongylocentrotus purpuratus]	1500	0.7075	P:dicarboxylic acid transport; P:transmembrane transport; F:sodium:dicarboxylate symporter activity; C:integral component of membrane
CGI_10007265	poly [ADP-ribose] polymerase 14-like	6057	0.6175	F:nucleotide binding; F:nucleic acid binding
CGI_10016254	Core-binding factor subunit beta	309	0.8675	C:nucleus; F:transcription coactivator activity; P:protein polyubiquitination; C:membrane; P:osteoblast differentiation; P:myeloid cell differentiation; P:lymphocyte differentiation; P:cell maturation; P:positive regulation of transcription from RNA polymerase II promoter; P:definitive hemopoiesis		IPR003417 (G3DSA:2.40.250.GENE3D); IPR003417 (PFAM); IPR003417 (PANTHER); IPR003417 (SUPERFAMILY)
CGI_10017702	GDP-mannose 4,6 dehydratase-like	1143	0.8955	F:fucosyltransferase activity; P:Notch signaling pathway; P:fucosylation; P:retina layer formation; P:GDP-mannose metabolic process; P:dorsal motor nucleus of vagus nerve development; P:vagus nerve development; F:GDP-mannose 4,6-dehydratase activity	EC:4.2.1.47; EC:2.4.1
CGI_10016154	tumor necrosis factor alpha-induced 3	3141	0.5865	P:protein deubiquitination; F:DNA binding; F:zinc ion binding; P:regulation of macromolecule metabolic process; F:protein binding; P:negative regulation of signal transduction; P:regulation of innate immune response; P:response to chemical; P:regulation of response to external stimulus; P:regulation of multicellular organismal process; P:negative regulation of immune system process; P:regulation …
CGI_10026913	T-complex 1 subunit beta	1590	0.9105	C:myelin sheath; F:unfolded protein binding; P:protein folding; P:toxin transport; C:zona pellucida receptor complex; C:microtubule; C:chaperonin-containing T-complex; F:ATP binding; P:binding of sperm to zona pellucida; C:extracellular exosome; F:ubiquitin protein ligase binding; C:cell body; P:chaperone-mediated protein complex assembly
CGI_10028029	VWA domain-containing [Tolypothrix campylonemoides]	1503	0.625	F:GTP binding; P:signal transduction; C:membrane
CGI_10005076	hypothetical protein CGI_10005076	729	0.965	C:integral component of membrane		no IPS match
CGI_10028638	cdc42 homolog	579	0.618	F:GTP binding; P:small GTPase mediated signal transduction; C:membrane; P:protein transport; C:intracellular		PR00449 (PRINTS); SM00173 (SMART); SM00174 (SMART); SM00175 (SMART); IPR005225 (TIGRFAM); IPR027417 (G3DSA:3.40.50.GENE3D); IPR001806 (PFAM); PTHR24072:SF142 (PANTHER); PTHR24072 (PANTHER); PS51419 (PROSITE_PROFILES); IPR027417 (SUPERFAMILY)
CGI_10006884	mucin-5AC-like isoform X1	2301	0.9825
CGI_10014915	phosphoenolpyruvate cytosolic [GTP]-like	1977	0.835	F:GTP binding; P:gluconeogenesis; F:phosphoenolpyruvate carboxykinase (GTP) activity; P:phosphorylation; F:kinase activity	EC:4.1.1.32	IPR008209 (PIRSF); IPR008210 (G3DSA:3.40.449.GENE3D); IPR008209 (PFAM); IPR013035 (G3DSA:3.90.228.GENE3D); IPR008209 (PANTHER); IPR008209 (HAMAP); IPR008210 (SUPERFAMILY); SSF53795 (SUPERFAMILY)
CGI_10013567	T-complex 1 subunit eta	1272	0.9115	C:chaperonin-containing T-complex; F:ATP binding; F:identical protein binding; P:binding of sperm to zona pellucida; C:extracellular exosome; C:mitochondrion; C:cell body; F:unfolded protein binding; P:protein folding; P:toxin transport; C:zona pellucida receptor complex; C:microtubule		IPR017998 (PRINTS); IPR027413 (G3DSA:1.10.560.GENE3D); IPR002423 (PFAM); IPR027410 (G3DSA:3.30.260.GENE3D); IPR027409 (G3DSA:3.50.7.GENE3D); IPR012720 (TIGRFAM); PTHR11353 (PANTHER); IPR012720 (PTHR11353:PANTHER); SSF48592 (SUPERFAMILY); IPR027409 (SUPERFAMILY); SSF54849 (SUPERFAMILY)
CGI_10001123	Chorion peroxidase	2082	0.7035	F:peroxidase activity; P:response to oxidative stress; P:cellular oxidant detoxification; P:oxidation-reduction process; F:heme binding	EC:1.11.1.7
CGI_10010458	probable ATP-dependent RNA helicase DHX58	813	0.496	F:nucleic acid binding; P:metabolic process; P:regulation of innate immune response; F:helicase activity; P:regulation of cytokine production
CGI_10003139	eukaryotic translation initiation factor 2 subunit 1-like	774	0.891	C:multi-eIF complex; F:translation initiation factor activity; F:ribosome binding; C:ribosome; C:eukaryotic translation initiation factor 2B complex; C:eukaryotic 48S preinitiation complex; P:translational initiation; C:eukaryotic translation initiation factor 2 complex
CGI_10004165	Stress-induced 1	714	0.6065			IPR008978 (G3DSA:2.60.40.GENE3D); IPR002068 (PFAM); IPR002068 (PROSITE_PROFILES); IPR008978 (SUPERFAMILY); IPR008978 (SUPERFAMILY)
CGI_10010445	chitin deacetylase - partial	1749	0.6165	F:hydrolase activity, acting on carbon-nitrogen (but not peptide) bonds; P:carbohydrate metabolic process		IPR002509 (PFAM); IPR002509 (G3DSA:3.20.20.GENE3D); PTHR11177 (PANTHER); IPR011330 (SUPERFAMILY); IPR011330 (SUPERFAMILY)
CGI_10006763	ATPase family AAA domain-containing 3A	1827	0.853	F:ATP binding
CGI_10027789	prostaglandin E2 receptor EP4 subtype-like [Crassostrea gigas]	339	0.6805	F:G-protein coupled receptor activity; P:G-protein coupled receptor signaling pathway; C:integral component of membrane		no IPS match
CGI_10004124	zinc finger 346-like [Octopus bimaculoides]	2754	0.484	F:nucleic acid binding; C:nucleus; F:zinc ion binding		IPR003604 (SMART); IPR015880 (SMART); PF12874 (PFAM); PTHR23067 (PANTHER); PTHR23067:SF41 (PANTHER); IPR000690 (PROSITE_PROFILES); SSF57667 (SUPERFAMILY); SSF57667 (SUPERFAMILY); SSF57667 (SUPERFAMILY); SSF57667 (SUPERFAMILY); SSF57667 (SUPERFAMILY); SSF57667 (SUPERFAMILY); SSF57667 (SUPERFAMILY)
CGI_10008716	glycine--tRNA ligase-like	2247	0.841	F:glycine-tRNA ligase activity; F:ATP binding; F:zinc ion binding; P:glycyl-tRNA aminoacylation; C:cytoplasm	EC:6.1.1.14
CGI_10021725	yrdC domain-containing mitochondrial-like	972	0.8085	F:nucleotidyltransferase activity; C:cytoplasm; F:double-stranded RNA binding; P:regulation of translational fidelity; P:tRNA threonylcarbamoyladenosine modification; F:tRNA binding
CGI_10018564	MKI67 FHA domain-interacting nucleolar phospho -like	1167	0.709	F:nucleotide binding; F:nucleic acid binding
CGI_10007976	MORC family CW-type zinc finger 3	2127	0.7675	P:regulation of biological quality; P:single-organism cellular process; P:protein phosphorylation; C:nucleoplasm; P:single-organism developmental process		IPR003594 (G3DSA:3.30.565.GENE3D); PF13589 (PFAM); PTHR23336 (PANTHER); PTHR23336:SF17 (PANTHER); IPR003594 (SUPERFAMILY)
CGI_10024620	heat shock 70 kDa 12A-like	1941	0.6705	C:membrane; C:integral component of membrane
CGI_10007399	ATP-dependent RNA helicase DDX19B	1764	0.8435	F:nucleic acid binding; F:ATP binding; F:transcription factor activity, sequence-specific DNA binding; P:metabolic process; P:regulation of transcription, DNA-templated; F:helicase activity		IPR001650 (SMART); IPR014001 (SMART); IPR001650 (PFAM); IPR027417 (G3DSA:3.40.50.GENE3D); IPR011545 (PFAM); IPR027417 (G3DSA:3.40.50.GENE3D); PTHR24031 (PANTHER); PTHR24031:SF323 (PANTHER); PTHR24031 (PANTHER); PTHR24031:SF323 (PANTHER); IPR014001 (PROSITE_PROFILES); IPR014014 (PROSITE_PROFILES); IPR001650 (PROSITE_PROFILES); IPR027417 (SUPERFAMILY)
CGI_10011582	A disintegrin and metallo ase with thrombospondin motifs 1	807	0.7167	C:integral component of membrane
CGI_10023358	nicotinamide phosphoribosyltransferase-like	1470	0.824	F:nicotinate-nucleotide diphosphorylase (carboxylating) activity; P:NAD biosynthetic process	EC:2.4.2.19	IPR016471 (PIRSF); IPR007229 (PFAM); G3DSA:3.20.140.10 (GENE3D); IPR007229 (PANTHER); PTHR11098:SF2 (PANTHER); IPR002638 (SUPERFAMILY); SSF54675 (SUPERFAMILY)
CGI_10013524	poly [ADP-ribose] polymerase 15-like [Crassostrea gigas]	1974	0.554	P:metabolic process; F:NAD+ ADP-ribosyltransferase activity	EC:2.4.2.30	IPR002589 (SMART); G3DSA:3.40.220.10 (GENE3D); G3DSA:3.40.220.10 (GENE3D); IPR012317 (PFAM); IPR012317 (G3DSA:3.90.228.GENE3D); IPR002589 (PFAM); PTHR14453:SF62 (PANTHER); PTHR14453 (PANTHER); IPR002589 (PROSITE_PROFILES); IPR012317 (PROSITE_PROFILES); SSF52949 (SUPERFAMILY); SSF52949 (SUPERFAMILY); SSF56399 (SUPERFAMILY)
CGI_10010150	eukaryotic translation initiation factor 3 subunit C-like isoform X2	3144	0.8555	F:translation initiation factor activity; P:formation of translation preinitiation complex; C:eukaryotic translation initiation factor 3 complex, eIF3m; C:eukaryotic 43S preinitiation complex; C:eukaryotic 48S preinitiation complex; F:translation initiation factor binding; P:regulation of translational initiation
CGI_10021675	eukaryotic translation initiation factor 3 subunit B	2106	0.8195	C:eukaryotic 48S preinitiation complex; P:regulation of translational initiation; C:nucleoplasm; F:nucleotide binding; F:translation initiation factor activity; F:protein complex scaffold; P:IRES-dependent viral translational initiation; P:formation of translation preinitiation complex; C:extracellular exosome; C:eukaryotic translation initiation factor 3 complex, eIF3m; C:eukaryotic 43S preiniti…		IPR000504 (SMART); IPR011400 (PIRSF); IPR013979 (PFAM); IPR015943 (G3DSA:2.130.10.GENE3D); IPR000504 (PFAM); IPR011042 (G3DSA:2.120.10.GENE3D); IPR012677 (G3DSA:3.30.70.GENE3D); IPR011400 (PANTHER); PTHR14068:SF0 (PANTHER); IPR011400 (HAMAP); IPR000504 (PROSITE_PROFILES); IPR012677 (SUPERFAMILY); SSF82171 (SUPERFAMILY)
CGI_10019657	Tripartite motif-containing 45	1077	0.5311	F:zinc ion binding; F:metal ion binding; C:intracellular		IPR011042 (G3DSA:2.120.10.GENE3D); SSF101898 (SUPERFAMILY)
CGI_10014506	cysteine--tRNA cytoplasmic isoform X2	1029	0.8695	F:ATP binding; F:zinc ion binding; F:protein homodimerization activity; C:cytoplasm; F:cysteine-tRNA ligase activity; F:tRNA binding; P:cysteinyl-tRNA aminoacylation	EC:6.1.1.16
CGI_10009892	Lupus brain antigen 1	8457	0.7485	F:ATP binding		IPR014016 (PFAM); IPR027417 (G3DSA:3.40.50.GENE3D); IPR020683 (G3DSA:1.25.40.GENE3D); IPR027417 (G3DSA:3.40.50.GENE3D); IPR020683 (G3DSA:1.25.40.GENE3D); PTHR21529:SF4 (PANTHER); PTHR21529 (PANTHER); IPR020683 (PROSITE_PROFILES); IPR020683 (SUPERFAMILY); IPR011990 (SUPERFAMILY); IPR027417 (SUPERFAMILY); IPR020683 (SUPERFAMILY)
CGI_10021001	inositol-3-phosphate synthase 1-A-like	1620	0.839	F:inositol-3-phosphate synthase activity; P:inositol biosynthetic process; P:phospholipid biosynthetic process	EC:5.5.1.4
CGI_10018910	Major facilitator superfamily domain-containing 10	3684	0.666	P:transmembrane transport; C:integral component of membrane; F:ADP binding; F:transporter activity
CGI_10028642	hypothetical protein CGI_10028642	219	1			no IPS match
CGI_10016209	Poly [ADP-ribose] polymerase 14	5781	0.575	F:nucleotide binding; F:nucleic acid binding; P:metabolic process; F:NAD+ ADP-ribosyltransferase activity	EC:2.4.2.30
CGI_10019647	Tripartite motif-containing 45	1893	0.5355	F:zinc ion binding; C:intracellular		IPR001841 (SMART); IPR011042 (G3DSA:2.120.10.GENE3D); IPR013083 (G3DSA:3.30.40.GENE3D); IPR027370 (PFAM); PTHR24103 (PANTHER); IPR000315 (PROSITE_PROFILES); IPR001841 (PROSITE_PROFILES); SSF57850 (SUPERFAMILY); SSF63829 (SUPERFAMILY)
CGI_10020901	PREDICTED: uncharacterized protein LOC105347142 [Crassostrea gigas]	942	0.715			no IPS match
CGI_10002603	Nucleotide exchange factor SIL1	1014	0.643	C:extracellular space; C:endoplasmic reticulum
CGI_10028439	tyrosine- kinase JAK2-like	4008	0.6445	P:embryo development; P:peptidyl-tyrosine phosphorylation; P:response to growth factor; P:activation of GTPase activity; P:cell chemotaxis; C:integral component of plasma membrane; F:ATP binding; P:protein kinase B signaling; C:focal adhesion; F:non-membrane spanning protein tyrosine kinase activity; F:transmembrane receptor protein tyrosine kinase activity; F:calcium ion binding; C:leading edge …	EC:2.7.10.1; EC:2.7.10.2	IPR001245 (PRINTS); G3DSA:3.30.200.20 (GENE3D); IPR001245 (PFAM); G3DSA:1.10.510.10 (GENE3D); IPR011992 (G3DSA:1.10.238.GENE3D); IPR000980 (G3DSA:3.30.505.GENE3D); G3DSA:1.10.510.10 (GENE3D); PTHR24418:SF235 (PANTHER); PTHR24418 (PANTHER); PTHR24418:SF235 (PANTHER); PTHR24418:SF235 (PANTHER); PTHR24418 (PANTHER); IPR000719 (PROSITE_PROFILES); IPR002048 (PROSITE_PROFILES); IPR000719 (PROSITE_PROFI…
CGI_10020246	hypothetical protein CGI_10020246	639	0.6533	C:membrane; C:integral component of membrane
CGI_10025541	RRP5 homolog	4770	0.595	F:nucleic acid binding; C:nucleus; P:mRNA processing		IPR022967 (SMART); IPR003107 (SMART); IPR011990 (G3DSA:1.25.40.GENE3D); IPR008847 (PFAM); IPR002885 (PFAM); IPR012340 (G3DSA:2.40.50.GENE3D); IPR003029 (PFAM); IPR002885 (TIGRFAM); IPR012340 (G3DSA:2.40.50.GENE3D); PTHR23270:SF10 (PANTHER); PTHR23270 (PANTHER); IPR002885 (PROSITE_PROFILES); IPR003029 (PROSITE_PROFILES); IPR012340 (SUPERFAMILY); IPR012340 (SUPERFAMILY); IPR012340 (SUPERFAMILY); IP…
CGI_10017234	hypothetical protein CGI_10017234	594	0.628			no IPS match
CGI_10001712	paramyosin-like isoform X1 [Crassostrea gigas]	1509	0.617	P:signal transduction; C:integral component of membrane		IPR000488 (SMART); IPR011029 (G3DSA:1.10.533.GENE3D); IPR000488 (PFAM); IPR031981 (PFAM); IPR000488 (PROSITE_PROFILES); IPR011029 (SUPERFAMILY)
CGI_10020752	dicer 1	1563	0.587	F:nucleic acid binding; F:ATP binding
CGI_10011080	10 kDa heat shock mitochondrial	468	0.8405	F:ATP binding; C:mitochondrial matrix; F:metal ion binding; F:chaperone binding; P:chaperone mediated protein folding requiring cofactor; F:unfolded protein binding; P:response to unfolded protein
CGI_10016949	Nuclear Factor of Kappa light polypeptide gene enhancer in b(B)-cells n [Caenorhabditis elegans]	2946	0.628	F:DNA binding; C:nucleus; F:transcription factor activity, sequence-specific DNA binding; C:cytoplasm; P:transcription, DNA-templated; P:signal transduction; P:apoptotic process; P:regulation of transcription, DNA-templated; F:transcription factor binding; P:regulation of transcription from RNA polymerase II promoter		IPR002110 (SMART); IPR002110 (PFAM); IPR020683 (G3DSA:1.25.40.GENE3D); IPR020683 (PFAM); PTHR24198 (PANTHER); IPR020683 (PROSITE_PROFILES); IPR002110 (PROSITE_PROFILES); IPR020683 (SUPERFAMILY)
CGI_10026972	MFS-type transporter SLC18B1-like	1365	0.602	P:transmembrane transport; C:integral component of membrane		IPR011701 (PFAM); G3DSA:1.20.1250.20 (GENE3D); G3DSA:1.20.1250.20 (GENE3D); PTHR23506 (PANTHER); PTHR23506:SF2 (PANTHER); IPR020846 (SUPERFAMILY)
CGI_10020159	hypothetical protein CGI_10020159	1896	0.7743			no IPS match
CGI_10013387	PREDICTED: uncharacterized protein LOC105336172 [Crassostrea gigas]	1602	0.695			no IPS match
CGI_10016232	dnaJ homolog subfamily C member 3-like	1239	0.76
CGI_10027222	Heat shock 70 kDa 13	1362	0.73	F:ATP binding; C:membrane
CGI_10015821	PREDICTED: uncharacterized protein LOC105346580 [Crassostrea gigas]	1413	0.5733			IPR029021 (G3DSA:3.90.190.GENE3D); IPR029021 (SUPERFAMILY)
CGI_10023972	hypothetical protein CGI_10023972	321	0.87	C:integral component of membrane
CGI_10005410	apoptosis-inducing factor mitochondrial isoform X2	1632	0.69	C:cell; F:oxidoreductase activity; F:flavin adenine dinucleotide binding; F:protein dimerization activity; P:cell redox homeostasis; P:oxidation-reduction process
CGI_10008834	78 kDa glucose-regulated	1248	0.953	F:ATPase activity; P:IRE1-mediated unfolded protein response; P:PERK-mediated unfolded protein response; C:smooth endoplasmic reticulum; C:endoplasmic reticulum-Golgi intermediate compartment; C:endoplasmic reticulum lumen; P:cerebellar Purkinje cell layer development; P:nematode larval development; F:calcium ion binding; F:chaperone binding; P:positive regulation of protein ubiquitination; P:mai…	EC:3.6.1.3
CGI_10019135	spermine oxidase	1464	0.6515	F:oxidoreductase activity; P:oxidation-reduction process		PR00419 (PRINTS); IPR002937 (PFAM); IPR023753 (G3DSA:3.50.50.GENE3D); PTHR10742:SF306 (PANTHER); PTHR10742 (PANTHER); IPR023753 (SUPERFAMILY); SSF54373 (SUPERFAMILY)
CGI_10023649	26S proteasome non-ATPase regulatory subunit 2	2622	0.8905	C:nucleus; P:proteasome-mediated ubiquitin-dependent protein catabolic process; C:proteasome regulatory particle, base subcomplex; P:regulation of catalytic activity; F:endopeptidase activity; P:regulation of protein catabolic process; C:proteasome storage granule; F:enzyme regulator activity
CGI_10007386	perlucin 5	984	0.6155	F:chitin binding; F:oxidoreductase activity; F:metal ion binding; P:metabolic process; P:chitin metabolic process; P:oxidation-reduction process; C:extracellular region
CGI_10000462	polyadenylate-binding 4-like	600	0.8375	F:nucleotide binding; F:RNA binding; C:cytoplasm		IPR000504 (SMART); IPR012677 (G3DSA:3.30.70.GENE3D); IPR000504 (PFAM); IPR012677 (G3DSA:3.30.70.GENE3D); IPR012677 (G3DSA:3.30.70.GENE3D); PTHR24012:SF491 (PANTHER); PTHR24012 (PANTHER); IPR000504 (PROSITE_PROFILES); IPR012677 (SUPERFAMILY); IPR012677 (SUPERFAMILY)
CGI_10007793	tyrosinase tyr-3	1977	0.6275	F:monophenol monooxygenase activity; F:metal ion binding; P:oxidation-reduction process	EC:1.14.18.1	IPR002227 (PRINTS); IPR002227 (PFAM); IPR008922 (G3DSA:1.10.1280.GENE3D); PTHR11474 (PANTHER); PTHR11474:SF21 (PANTHER); IPR008922 (SUPERFAMILY)
CGI_10011753	phenylalanine--tRNA ligase beta subunit	2232	0.7765	F:magnesium ion binding; F:ATP binding; F:RNA binding; F:phenylalanine-tRNA ligase activity; P:phenylalanyl-tRNA aminoacylation; C:phenylalanine-tRNA ligase complex	EC:6.1.1.20
CGI_10028063	UDP-xylose and UDP-N-acetylglucosamine transporter	894	0.6185	F:nucleotide-sugar transmembrane transporter activity; P:transmembrane transport; P:pyrimidine nucleotide-sugar transport; C:intracellular membrane-bounded organelle; C:integral component of membrane; C:endomembrane system; C:cytoplasmic part; P:organic anion transport		IPR013657 (PFAM); PTHR10778:SF4 (PANTHER); PTHR10778 (PANTHER); SSF103481 (SUPERFAMILY)
CGI_10008494	Zinc finger ZPR1	1296	0.7375	C:nucleus; F:zinc ion binding; C:cytoplasm
CGI_10002997	Tripartite motif-containing 3	375	0.721	F:zinc ion binding; C:intracellular
CGI_10002605	Nucleotide exchange factor SIL1	483	0.773	C:integral component of membrane
CGI_10002375	T-complex 1 subunit theta	2295	0.8555	F:ATP binding; C:microtubule organizing center; C:cytoplasm; F:unfolded protein binding; P:protein folding		IPR017998 (PRINTS); IPR027409 (G3DSA:3.50.7.GENE3D); IPR027413 (G3DSA:1.10.560.GENE3D); IPR002423 (PFAM); IPR027413 (G3DSA:1.10.560.GENE3D); IPR012721 (TIGRFAM); IPR027410 (G3DSA:3.30.260.GENE3D); PTHR11353 (PANTHER); PTHR11353:SF78 (PANTHER); SSF48592 (SUPERFAMILY); SSF54849 (SUPERFAMILY); IPR027409 (SUPERFAMILY); SSF48592 (SUPERFAMILY)
CGI_10016017	von Willebrand factor type EGF and pentraxin domain-containing 1-like isoform X2 [Crassostrea gigas]	2244	0.7	F:chitin binding; P:chitin metabolic process; C:extracellular region
CGI_10017263	T-complex 1 subunit delta-like	1518	0.9265	F:ATP binding; C:cytoplasm; F:unfolded protein binding; P:protein folding
CGI_10025137	von Willebrand factor D and EGF domain-containing -like	3369	0.564	C:membrane; C:integral component of membrane		IPR001846 (PFAM); G3DSA:2.10.25.10 (GENE3D); IPR001846 (PROSITE_PROFILES)
CGI_10027444	helicase with zinc finger domain 2-like isoform X1 [Crassostrea gigas]	2481	0.6475	F:nucleotide binding; F:nucleic acid binding; F:5'-flap endonuclease activity; F:ATP binding; F:zinc ion binding; F:metal ion binding; F:single-stranded DNA-dependent ATPase activity; F:ligand-dependent nuclear receptor transcription coactivator activity; P:regulation of nucleic acid-templated transcription; P:DNA replication, Okazaki fragment processing		SM00955 (SMART); PF00773 (PFAM); PTHR23355 (PANTHER); IPR012340 (SUPERFAMILY)
CGI_10024740	7-alpha-hydroxycholest-4-en-3-one 12-alpha-hydroxylase-like	1473	0.6125	C:endoplasmic reticulum membrane; F:iron ion binding; F:oxidoreductase activity, acting on paired donors, with incorporation or reduction of molecular oxygen; C:integral component of membrane; P:oxidation-reduction process; F:monooxygenase activity; F:heme binding
CGI_10004192	multiple epidermal growth factor-like domains 10 isoform X1 [Crassostrea gigas]	1011	0.7595	P:protein dephosphorylation; C:integral component of membrane; F:phosphatase activity	EC:3.1.3.41
CGI_10005182	double-stranded RNA-specific adenosine deaminase-like	3234	0.743	F:RNA binding; F:double-stranded RNA adenosine deaminase activity; P:RNA processing
CGI_10010088	nicotinamide nicotinic acid mononucleotide adenylyltransferase 1-like isoform X1	804	0.709	F:nucleotide binding; P:pyridine nucleotide biosynthetic process; F:adenylyltransferase activity		IPR005248 (TIGRFAM); IPR004821 (PFAM); IPR014729 (G3DSA:3.40.50.GENE3D); PTHR12039:SF0 (PANTHER); IPR005248 (PANTHER); SSF52374 (SUPERFAMILY)
CGI_10007378	brain-derived neurotrophic partial	396	0.574	P:regulation of cellular process; C:intracellular membrane-bounded organelle; P:cellular component organization; P:generation of neurons; F:receptor binding; P:response to stimulus
CGI_10012337	hypothetical protein CGI_10012337	903	0.925	P:immune response; C:integral component of membrane; F:tumor necrosis factor receptor binding		IPR008983 (G3DSA:2.60.120.GENE3D); IPR006052 (PROSITE_PROFILES); IPR008983 (SUPERFAMILY)
CGI_10005089	uncharacterized GTP-binding -like	867	0.671	F:GTP binding		IPR006073 (PRINTS); IPR013646 (PFAM); IPR006073 (PFAM); IPR027417 (G3DSA:3.40.50.GENE3D); PTHR23305:SF1 (PANTHER); PTHR23305 (PANTHER); IPR027417 (SUPERFAMILY)
CGI_10000061	hypothetical protein CGI_10000061	270	1			no IPS match
CGI_10013222	ruvB-like 1	1371	0.9575	P:histone H4 acetylation; P:DNA repair; C:NuA4 histone acetyltransferase complex; P:histone H2A acetylation; P:regulation of mitophagy; P:positive regulation of telomerase RNA localization to Cajal body; C:Swr1 complex; C:Golgi apparatus; P:beta-catenin-TCF complex assembly; P:cell division; F:ATP binding; C:extracellular exosome; P:DNA duplex unwinding; C:Ino80 complex; C:MLL1 complex; P:transcr…	EC:3.6.1	IPR003593 (SMART); IPR027417 (G3DSA:3.40.50.GENE3D); IPR010339 (PFAM); G3DSA:1.10.8.60 (GENE3D); IPR027238 (PANTHER); IPR027417 (SUPERFAMILY)
CGI_10016057	poly [ADP-ribose] polymerase 14-like	1119	0.637	F:nucleotide binding; F:nucleic acid binding		IPR000504 (SMART); IPR012677 (G3DSA:3.30.70.GENE3D); IPR000504 (PFAM); PTHR14453 (PANTHER); IPR000504 (PROSITE_PROFILES); IPR012677 (SUPERFAMILY)
CGI_10018418	myb U [Octopus bimaculoides]	2055	0.64			no IPS match
CGI_10012980	Zinc finger partial	2217	0.539	F:zinc ion binding; F:metal ion binding		PTHR22938:SF0 (PANTHER); PTHR22938 (PANTHER)
CGI_10003321	[Nematostella vectensis]	6021	0.5511	C:integral component of membrane
CGI_10003485	SLIT-ROBO Rho GTPase-activating 1-like	708	0.8025	F:zinc ion binding; C:intracellular		no IPS match
CGI_10026934	myeloperoxidase-like [Crassostrea gigas]	1671	0.667	F:peroxidase activity; P:response to oxidative stress; C:membrane; P:cellular oxidant detoxification; P:oxidation-reduction process; F:heme binding	EC:1.11.1.7	IPR019791 (PRINTS); IPR019791 (G3DSA:1.10.640.GENE3D); IPR019791 (PFAM); PTHR11475 (PANTHER); IPR019791 (PROSITE_PROFILES); IPR010255 (SUPERFAMILY)
CGI_10002698	tryptophan--tRNA cytoplasmic-like	1251	0.892	C:nucleus; F:ATP binding; C:extracellular exosome; C:cytoplasm; P:regulation of angiogenesis; P:tryptophanyl-tRNA aminoacylation; F:tryptophan-tRNA ligase activity	EC:6.1.1.2
CGI_10022015	Phosphoenolpyruvate phosphomutase	981	0.89	F:phosphoenolpyruvate mutase activity; P:organic phosphonate biosynthetic process; P:glyoxylate cycle; C:cytoplasm; F:metal ion binding; F:transferase activity, transferring acyl groups, acyl groups converted into alkyl on transfer	EC:5.4.2.9
CGI_10020714	cirhin-like [Octopus bimaculoides]	1836	0.5895
CGI_10021010	hypothetical protein CGI_10021010	663	0.62
CGI_10006511	histidine--tRNA cytoplasmic isoform X2	1548	0.8645	F:histidine-tRNA ligase activity; F:ATP binding; P:histidyl-tRNA aminoacylation; C:cytoplasm	EC:6.1.1.21
CGI_10015526	PREDICTED: uncharacterized protein LOC105327700 [Crassostrea gigas]	1233	0.7233	C:integral component of membrane		no IPS match
CGI_10019673	Lupus brain antigen 1	2535	0.719	F:ATP binding		no IPS match
CGI_10001842	PREDICTED: uncharacterized protein LOC105320768	1431	0.699	F:GTP binding; P:signal transduction; C:membrane		IPR002035 (G3DSA:3.40.50.GENE3D); PTHR24070:SF177 (PANTHER); IPR020849 (PANTHER); IPR002035 (PROSITE_PROFILES); IPR002035 (SUPERFAMILY)
CGI_10027842	Solute carrier family facilitated glucose transporter member 1	1740	0.646	C:intracellular organelle; F:substrate-specific transmembrane transporter activity; P:transmembrane transport; C:integral component of membrane; C:cytoplasmic part; P:glucose transport; C:membrane-bounded organelle; C:plasma membrane part		IPR003663 (PRINTS); G3DSA:1.20.1250.20 (GENE3D); IPR005828 (PFAM); IPR003663 (TIGRFAM); PTHR23503 (PANTHER); IPR020846 (PROSITE_PROFILES); IPR020846 (SUPERFAMILY)
CGI_10016499	partial	852	0.6105			IPR026065 (PFAM); IPR026065 (PANTHER)
CGI_10026874	Obg-like ATPase 1	1236	0.8505	F:GTP binding; F:ATPase activity; F:ATP binding; C:cytoplasm; F:ribosome binding; P:metabolic process; F:ribosomal large subunit binding	EC:3.6.1.3
CGI_10003693	UMP-CMP kinase mitochondrial	1116	0.693	C:nucleus; F:uridylate kinase activity; P:nucleotide phosphorylation; P:pyrimidine deoxyribonucleotide biosynthetic process; P:nucleoside triphosphate biosynthetic process; P:pyrimidine deoxyribonucleoside diphosphate biosynthetic process; C:cytoplasmic part	EC:2.7.4
CGI_10012077	Mitosis inhibitor kinase wee1 [Crassostrea gigas]	3246	0.482	F:ATP binding; F:protein kinase activity; P:protein phosphorylation		IPR000719 (SMART); IPR001245 (PFAM); G3DSA:1.10.510.10 (GENE3D); IPR027417 (G3DSA:3.40.50.GENE3D); IPR027417 (G3DSA:3.40.50.GENE3D); IPR022812 (PFAM); PTHR26392 (PANTHER); PTHR26392:SF78 (PANTHER); IPR000719 (PROSITE_PROFILES); IPR027417 (SUPERFAMILY); IPR011009 (SUPERFAMILY)
CGI_10024070	interferon-induced 44-like [Crassostrea gigas]	1413	0.7645	F:GTP binding
CGI_10010087	Nucleolar 14	2529	0.6695	C:small-subunit processome; C:nuclear part		IPR007276 (PFAM); PTHR23183:SF0 (PANTHER); IPR007276 (PANTHER)
CGI_10011216	hypothetical protein CGI_10011216	402	0.6545	C:membrane; C:integral component of membrane		PTHR35378 (PANTHER)
CGI_10006414	PREDICTED: uncharacterized protein DDB_G0283357-like isoform X1	1137	0.9933
CGI_10003181	hypothetical protein CGI_10003181	1851	1
CGI_10023024	Coatomer subunit beta	2892	0.888	F:protein binding; P:notochord development; P:retrograde vesicle-mediated transport, Golgi to ER; P:somite development; F:structural molecule activity; C:endoplasmic reticulum; P:intra-Golgi vesicle-mediated transport; C:endoplasmic reticulum-Golgi intermediate compartment; P:intracellular protein transport; C:plasma membrane; C:COPI vesicle coat		IPR016460 (PIRSF); IPR011710 (PFAM); IPR002553 (PFAM); IPR029446 (PFAM); IPR011989 (G3DSA:1.25.10.GENE3D); IPR016460 (PANTHER); IPR016024 (SUPERFAMILY)
CGI_10005263	AT-rich interactive domain-containing 1B-like	459	0.5556
CGI_10021324	FAM199X-B- partial	678	0.694			IPR029672 (PFAM); PTHR32003 (PANTHER)
CGI_10005366	runt-related transcription factor 1-like isoform X2 [Lingula anatina]	1638	0.7865	C:nucleus; F:DNA binding; F:ATP binding; F:transcription factor activity, sequence-specific DNA binding; P:regulation of transcription, DNA-templated
CGI_10016408	GDP-L-fucose synthase-like [Lingula anatina]	927	0.8445	P:cytolysis; C:extracellular exosome; F:coenzyme binding; P:'de novo' GDP-L-fucose biosynthetic process; P:GDP-mannose metabolic process; F:GDP-L-fucose synthase activity	EC:1.1.1.271	IPR016040 (G3DSA:3.40.50.GENE3D); IPR001509 (PFAM); G3DSA:3.90.25.10 (GENE3D); PTHR10366:SF259 (PANTHER); PTHR10366 (PANTHER); IPR028614 (HAMAP); IPR016040 (SUPERFAMILY)
CGI_10028244	Tripartite motif-containing 2	2622	0.8505	F:zinc ion binding; C:intracellular		IPR000315 (SMART); IPR000315 (PFAM); IPR000315 (G3DSA:4.10.45.GENE3D); IPR011042 (G3DSA:2.120.10.GENE3D); PTHR15698 (PANTHER); PTHR15698:SF4 (PANTHER); IPR013017 (PROSITE_PROFILES); IPR000315 (PROSITE_PROFILES); SSF57845 (SUPERFAMILY); SSF101898 (SUPERFAMILY)
CGI_10016717	serine--tRNA cytoplasmic-like	483	0.8575	F:ATP binding; C:cytoplasm; P:patterning of blood vessels; F:serine-tRNA ligase activity; P:seryl-tRNA aminoacylation	EC:6.1.1.11
CGI_10002589	Cysteine dioxygenase type 1	1680	0.669	P:sulfur compound biosynthetic process; F:cysteine dioxygenase activity; F:iron ion binding; P:oxidation-reduction process; P:organonitrogen compound biosynthetic process; P:response to organonitrogen compound; P:response to oxygen-containing compound; P:L-cysteine catabolic process	EC:1.13.11.20
CGI_10005311	G8 domain-containing DDB_G0286311-like	1362	0.868	C:membrane; C:integral component of membrane		IPR001507 (SMART); IPR001507 (PFAM); IPR001507 (PROSITE_PROFILES)
CGI_10027614	prostaglandin E2 receptor EP4 subtype-like	1020	0.6265	F:G-protein coupled receptor activity; P:G-protein coupled receptor signaling pathway; C:integral component of membrane
CGI_10003999	tyrosine--tRNA cytoplasmic	1095	0.9015	F:tyrosine-tRNA ligase activity; F:ATP binding; P:tyrosyl-tRNA aminoacylation; C:cytoplasm; F:tRNA binding	EC:6.1.1.1
CGI_10013044	hypothetical protein CGI_10013044	1275	0.98			no IPS match
CGI_10016954	Serine threonine- kinase TBK1	2001	0.672	F:ATP binding; F:protein kinase activity; P:protein phosphorylation		IPR000719 (SMART); IPR000719 (PFAM); G3DSA:1.10.510.10 (GENE3D); PTHR22969 (PANTHER); PTHR22969:SF15 (PANTHER); IPR000719 (PROSITE_PROFILES); IPR011009 (SUPERFAMILY)
CGI_10011570	hypothetical protein CGI_10011570	456	1			no IPS match
CGI_10021602	hypothetical protein CGI_10021602	180	1			no IPS match
CGI_10006087	Tripartite motif-containing 3	846	0.6685	P:response to biotic stimulus; F:zinc ion binding; C:membrane; C:integral component of membrane; C:intracellular
CGI_10016228	Fas ligand	738	0.7782	P:immune response; C:membrane; P:metabolic process; F:tumor necrosis factor receptor binding; F:N-acetyltransferase activity	EC:2.3.1
CGI_10002038	Mucosa-associated lymphoid tissue lymphoma translocation 1	2385	0.509	P:proteolysis; F:cysteine-type endopeptidase activity	EC:3.4.22	IPR003599 (SMART); IPR013783 (G3DSA:2.60.40.GENE3D); PF13927 (PFAM); IPR013783 (G3DSA:2.60.40.GENE3D); IPR029030 (G3DSA:3.40.50.GENE3D); IPR011029 (G3DSA:1.10.533.GENE3D); IPR007110 (PFAM); PF00656 (PFAM); PTHR22576:SF31 (PANTHER); PTHR22576 (PANTHER); IPR007110 (PROSITE_PROFILES); IPR001309 (PROSITE_PROFILES); IPR029030 (SUPERFAMILY); IPR007110 (SUPERFAMILY); IPR007110 (SUPERFAMILY); IPR011029 (…
CGI_10019692	calcitonin gene-related peptide type 1 receptor-like	1791	0.6435	F:G-protein coupled receptor activity; P:G-protein coupled receptor signaling pathway; P:regulation of translational fidelity; C:integral component of membrane; F:aminoacyl-tRNA editing activity; P:cell surface receptor signaling pathway		IPR000832 (PRINTS); IPR001879 (SMART); IPR001879 (PFAM); IPR007214 (G3DSA:3.90.960.GENE3D); IPR000832 (PFAM); PTHR12011 (PANTHER); PTHR12011:SF67 (PANTHER); IPR017981 (PROSITE_PROFILES); IPR001879 (PROSITE_PROFILES); SSF111418 (SUPERFAMILY)
CGI_10026034	probable serine threonine- kinase pats1	3147	0.5375	F:GTP binding; P:small GTPase mediated signal transduction; F:peptidase activity; P:phosphorylation; F:kinase activity; C:intracellular		IPR000980 (SMART); IPR000980 (G3DSA:3.30.505.GENE3D); IPR000980 (PFAM); G3DSA:3.30.70.1390 (GENE3D); IPR011029 (G3DSA:1.10.533.GENE3D); IPR027417 (G3DSA:3.40.50.GENE3D); IPR013684 (PFAM); IPR000980 (G3DSA:3.30.505.GENE3D); IPR032171 (PFAM); PTHR10454 (PANTHER); PTHR10454:SF145 (PANTHER); IPR000980 (PROSITE_PROFILES); IPR000488 (PROSITE_PROFILES); IPR020859 (PROSITE_PROFILES); IPR000980 (SUPERFAMI…
CGI_10016162	Stress-70 mitochondrial	2112	0.9255	F:ATP binding; C:myelin sheath; C:extracellular exosome; F:ubiquitin protein ligase binding; C:focal adhesion; F:2-alkenal reductase [NAD(P)] activity; F:unfolded protein binding; P:oxidation-reduction process; P:protein folding; P:protein export from nucleus; C:mitochondrial nucleoid; F:poly(A) RNA binding	EC:1.3.1.74
CGI_10025364	Lon protease mitochondrial	3231	0.7865	C:nucleus; F:ATP binding; F:mitochondrial light strand promoter anti-sense binding; P:misfolded or incompletely synthesized protein catabolic process; C:mitochondrial matrix; P:chaperone-mediated protein complex assembly; F:serine-type endopeptidase activity; F:ATP-dependent peptidase activity; P:response to stress; P:mitochondrion organization; F:single-stranded DNA binding	EC:3.4.21	PR00830 (PRINTS); IPR003111 (SMART); IPR003593 (SMART); G3DSA:1.10.8.60 (GENE3D); IPR003959 (PFAM); IPR008269 (PFAM); IPR003111 (PFAM); IPR014721 (G3DSA:3.30.230.GENE3D); IPR027417 (G3DSA:3.40.50.GENE3D); IPR004815 (TIGRFAM); PTHR10046:SF50 (PANTHER); IPR027065 (PANTHER); IPR027503 (HAMAP); IPR020568 (SUPERFAMILY); IPR027417 (SUPERFAMILY); IPR015947 (SUPERFAMILY)
CGI_10016016	von Willebrand factor type EGF and pentraxin domain-containing 1	8547	0.591	F:chitin binding; P:chitin metabolic process; C:extracellular region
CGI_10020963	heat shock 70 kDa 12B-like [Crassostrea gigas]	1773	0.608	F:nucleotide binding; F:ATP binding; C:membrane; C:integral component of membrane		IPR013126 (PFAM); G3DSA:3.30.420.40 (GENE3D); G3DSA:3.30.420.40 (GENE3D); PTHR14187:SF47 (PANTHER); PTHR14187 (PANTHER); SSF53067 (SUPERFAMILY); SSF53067 (SUPERFAMILY)
CGI_10005050	tRNA 2 -phosphotransferase 1	288	0.8365	P:tRNA splicing, via endonucleolytic cleavage and ligation; F:transferase activity, transferring phosphorus-containing groups
CGI_10009751	galectin-4-like isoform X1 [Crassostrea gigas]	738	0.5965	F:carbohydrate binding		IPR001079 (SMART); IPR001079 (SMART); IPR013320 (G3DSA:2.60.120.GENE3D); IPR013320 (G3DSA:2.60.120.GENE3D); IPR001079 (PFAM); PTHR11346 (PANTHER); IPR001079 (PROSITE_PROFILES); IPR013320 (SUPERFAMILY); IPR013320 (SUPERFAMILY)
CGI_10010073	HEAT repeat-containing 1	5862	0.6195	C:nucleus; C:mitochondrion; C:membrane; C:nucleolus; F:poly(A) RNA binding		IPR012954 (SMART); IPR022125 (PFAM); IPR011989 (G3DSA:1.25.10.GENE3D); IPR012954 (PFAM); PTHR13457 (PANTHER); IPR016024 (SUPERFAMILY); IPR016024 (SUPERFAMILY); IPR016024 (SUPERFAMILY); IPR016024 (SUPERFAMILY)
CGI_10020425	ATP-binding cassette sub-family A member 1-like [Biomphalaria glabrata]	6150	0.643	F:ATPase activity; F:ATP binding; P:metabolic process; C:integral component of membrane; P:transport; F:transporter activity	EC:3.6.1.3	IPR003593 (SMART); PF12698 (PFAM); IPR027417 (G3DSA:3.40.50.GENE3D); IPR003439 (PFAM); IPR026082 (PANTHER); IPR003439 (PROSITE_PROFILES); IPR027417 (SUPERFAMILY); IPR027417 (SUPERFAMILY)
CGI_10006988	enolase-phosphatase E1-like	1176	0.5942	F:quinone binding; F:NAD binding; C:membrane; C:integral component of membrane; P:oxidation-reduction process; F:oxidoreductase activity, acting on NAD(P)H
CGI_10017860	ESF1 homolog isoform X2	2454	0.6775	C:nucleus
CGI_10008153	60S ribosomal export NMD3-like	1503	0.7875	P:ribosomal large subunit export from nucleus; C:cytoplasm; C:membrane; F:ribosomal large subunit binding; C:nucleolus; F:protein binding, bridging; C:nucleoplasm; F:poly(A) RNA binding
CGI_10000487	Eukaryotic translation initiation factor 4E	570	0.854	C:chromatoid body; P:stem cell population maintenance; C:cytoplasmic stress granule; F:eukaryotic initiation factor 4G binding; P:negative regulation of neuron differentiation; C:cytoplasmic mRNA processing body; P:translational initiation; P:positive regulation of mitotic cell cycle; F:poly(A) RNA binding; P:behavioral fear response; F:translation initiation factor activity; C:mRNA cap binding c…		IPR023398 (G3DSA:3.30.760.GENE3D); IPR001040 (PFAM); PTHR11960:SF14 (PANTHER); IPR001040 (PANTHER); IPR023398 (SUPERFAMILY)
CGI_10025213	[Nematostella vectensis]	600	0.5065	P:metabolic process; C:membrane; C:integral component of membrane; F:hydrolase activity
CGI_10003219	TPR and ankyrin repeat-containing 1-like	3915	0.729	F:ATP binding
CGI_10014162	steroid 17-alpha-hydroxylase 17,20 lyase-like [Aplysia californica]	1581	0.6065	F:iron ion binding; F:oxidoreductase activity, acting on paired donors, with incorporation or reduction of molecular oxygen; P:oxidation-reduction process; F:monooxygenase activity; F:heme binding
CGI_10007657	solute carrier family 23 member 2-like [Crassostrea gigas]	2070	0.7	P:transmembrane transport; C:integral component of membrane; F:transporter activity
CGI_10005155	uridine phosphorylase 1-like	909	0.814	C:cytoplasm; P:nucleotide catabolic process; P:nucleoside metabolic process; F:uridine phosphorylase activity	EC:2.4.2.3	IPR000845 (PFAM); IPR010059 (TIGRFAM); IPR000845 (G3DSA:3.40.50.GENE3D); IPR018017 (PANTHER); PTHR21234:SF15 (PANTHER); IPR000845 (SUPERFAMILY)
CGI_10006196	Poly [ADP-ribose] polymerase 14	6381	0.533	F:nucleotide binding; F:nucleic acid binding; P:metabolic process; F:NAD+ ADP-ribosyltransferase activity	EC:2.4.2.30
CGI_10026975	ubiquitin [Capsaspora owczarzaki ATCC 30864]	1398	0.681	F:GTP binding; P:signal transduction; C:membrane		IPR000626 (SMART); G3DSA:3.10.20.90 (GENE3D); IPR002035 (G3DSA:3.40.50.GENE3D); G3DSA:3.10.20.90 (GENE3D); IPR000626 (PFAM); PTHR24070:SF177 (PANTHER); IPR020849 (PANTHER); IPR000626 (PROSITE_PROFILES); IPR029071 (SUPERFAMILY); IPR002035 (SUPERFAMILY); IPR029071 (SUPERFAMILY)
CGI_10018566	CDV3 homolog isoform X2	804	0.6785
CGI_10013790		1263				PD360982 (PRODOM)
CGI_10015251	interleukin 17 [Crassostrea gigas]	447	0.58	C:extracellular region; F:cytokine activity
CGI_10007683	transient receptor potential cation channel subfamily M member 2-like [Crassostrea gigas]	3903	0.7665	F:ion channel activity; P:ion transmembrane transport; C:integral component of membrane		IPR005821 (PFAM); PTHR13800:SF12 (PANTHER); PTHR13800 (PANTHER)
CGI_10018746	polyenoic fatty acid isomerase-like	1572	0.6125	F:oxidoreductase activity; P:oxidation-reduction process		IPR023753 (G3DSA:3.50.50.GENE3D); IPR002937 (PFAM); IPR023753 (SUPERFAMILY)
CGI_10011273	FMRFamide receptor [Crassostrea gigas]	1149	0.6155	F:G-protein coupled receptor activity; P:G-protein coupled receptor signaling pathway; C:integral component of membrane
CGI_10010988	PREDICTED: uncharacterized protein LOC105340527 [Crassostrea gigas]	2028	0.6133			no IPS match
CGI_10007086	hypothetical protein CGI_10007086	795	0.93			no IPS match
CGI_10007430	HAUS augmin-like complex subunit 6	3015	0.6735	F:GTP binding; C:membrane		no IPS match
CGI_10001936	L-threonine 3- mitochondrial-like	1080	0.857	F:coenzyme binding; F:catalytic activity; P:metabolic process		IPR001509 (PFAM); IPR016040 (G3DSA:3.40.50.GENE3D); G3DSA:3.90.25.10 (GENE3D); PTHR10366:SF395 (PANTHER); PTHR10366 (PANTHER); IPR016040 (SUPERFAMILY)
CGI_10016396	PEK GCN2 kinase	756	0.673	F:translation initiation factor activity; F:ATP binding; P:cellular response to stress; P:single-organism cellular process; F:protein serine/threonine kinase activity; P:translational initiation; P:protein phosphorylation	EC:2.7.11
CGI_10020696	zinc metallo ase nas-15-like	1629	0.5775	F:zinc ion binding; P:proteolysis; F:metalloendopeptidase activity	EC:3.4.24
CGI_10009550	hypothetical protein CGI_10009550	621	0.995
CGI_10022573	hypothetical protein CGI_10022573	1215	0.81	C:integral component of membrane
CGI_10006580	mutS homolog 5	2151	0.653	F:ATP binding; P:mismatch repair; F:mismatched DNA binding; C:intracellular part; P:meiosis I		IPR000432 (SMART); IPR007696 (SMART); IPR007696 (PFAM); IPR007861 (PFAM); IPR027417 (G3DSA:3.40.50.GENE3D); G3DSA:1.10.1420.10 (GENE3D); IPR000432 (PFAM); PTHR11361:SF20 (PANTHER); PTHR11361 (PANTHER); IPR027417 (SUPERFAMILY); IPR007696 (SUPERFAMILY)
CGI_10014477	elongation of very long chain fatty acids 6-like [Octopus bimaculoides]	702	0.7685	C:integral component of membrane; F:transferase activity; P:fatty acid biosynthetic process
CGI_10020564	Signal recognition particle subunit partial	1770	0.7335	F:endoplasmic reticulum signal peptide binding; P:SRP-dependent cotranslational protein targeting to membrane; F:7S RNA binding; C:endoplasmic reticulum; F:signal recognition particle binding; C:signal recognition particle, endoplasmic reticulum targeting
CGI_10005254	asparagine--tRNA cytoplasmic	1677	0.8725	F:nucleic acid binding; F:ATP binding; F:5'-flap endonuclease activity; P:DNA repair; C:extracellular exosome; F:asparagine-tRNA ligase activity; P:DNA replication; C:mitochondrion; P:asparaginyl-tRNA aminoacylation; C:Slx1-Slx4 complex	EC:6.1.1.22
CGI_10009890	Titin	1047	0.579	P:peptidyl-tyrosine phosphorylation; F:transmembrane receptor protein tyrosine kinase activity; F:metal ion binding; C:integral component of membrane; P:transmembrane receptor protein tyrosine kinase signaling pathway	EC:2.7.10.1	IPR003599 (SMART); IPR003598 (SMART); IPR016243 (PIRSF); IPR013783 (G3DSA:2.60.40.GENE3D); IPR013098 (PFAM); IPR013783 (G3DSA:2.60.40.GENE3D); IPR013783 (G3DSA:2.60.40.GENE3D); PTHR10489 (PANTHER); IPR007110 (PROSITE_PROFILES); IPR007110 (SUPERFAMILY); IPR007110 (SUPERFAMILY); IPR007110 (SUPERFAMILY)
CGI_10010965	Elongation factor mitochondrial	2874	0.816	F:GTP binding; C:nucleus; F:translation elongation factor activity; F:GTPase activity; C:mitochondrion; P:mitochondrial translational elongation
CGI_10023183	slowmo homolog 2-like [Cynoglossus semilaevis]	735	0.6135	C:mitochondrion
CGI_10012739	G- coupled receptor Mth2	840	0.5345	F:G-protein coupled receptor activity; P:G-protein coupled receptor signaling pathway; C:integral component of membrane; P:cell surface receptor signaling pathway
CGI_10017269	partial [Drosophila simulans]	270	0.5995	P:signal transduction; P:innate immune response; C:integral component of membrane
CGI_10018147	tyrosine- kinase JAK2-like	954	0.98	F:ATP binding; P:peptidyl-tyrosine phosphorylation; C:cytoskeleton; F:non-membrane spanning protein tyrosine kinase activity; F:calcium ion binding	EC:2.7.10.2	IPR000299 (PROSITE_PROFILES)
CGI_10009614	golgin subfamily A member 6 2	678	0.7525
CGI_10013309	hypothetical protein CGI_10013309	324	1	C:integral component of membrane		no IPS match
CGI_10011576	malectin-A [Bombus impatiens]	615	0.795	C:integral component of membrane		IPR021720 (PFAM); PTHR13460 (PANTHER)
CGI_10022856	eukaryotic translation initiation factor 4 gamma 3-like isoform X1 [Crassostrea gigas]	4617	0.7765	F:translation initiation factor activity; P:translational initiation
CGI_10004793	hypothetical protein CGI_10004793	1050	0.8086
CGI_10013568	T-complex 1 subunit eta-like	711	0.9145	F:ATP binding; C:cytoplasm; F:unfolded protein binding; P:protein folding		IPR017998 (PRINTS); IPR027413 (G3DSA:1.10.560.GENE3D); IPR027409 (G3DSA:3.50.7.GENE3D); IPR002423 (PFAM); PTHR11353 (PANTHER); IPR012720 (PTHR11353:PANTHER); SSF48592 (SUPERFAMILY); IPR027409 (SUPERFAMILY)
CGI_10023478	cyclic GMP-AMP synthase	1344	0.632			IPR024810 (SMART); IPR024810 (PFAM); PTHR10656 (PANTHER)
CGI_10018777	splicing factor 3B subunit 3	3654	0.9165	C:U12-type spliceosomal complex; F:RNA binding; F:protein binding; C:catalytic step 2 spliceosome; P:protein complex assembly; P:negative regulation of protein catabolic process; C:nucleolus; C:small nuclear ribonucleoprotein complex; C:nucleoplasm; P:mRNA splicing, via spliceosome
CGI_10014865	hypothetical protein CGI_10014865	1215	0.8345	F:zinc ion binding; C:integral component of membrane		IPR013694 (PFAM); IPR007527 (PROSITE_PROFILES)
CGI_10022707	Kelch 3	1956	0.915	F:nucleotide binding		no IPS match
CGI_10018115	phosphomannomutase 2-like	1593	0.8115	C:cytoplasm; F:phosphomannomutase activity; P:GDP-mannose biosynthetic process	EC:5.4.2.8
CGI_10013980	probable D-tyrosyl-tRNA(Tyr) deacylase 2	495	0.7385	F:D-tyrosyl-tRNA(Tyr) deacylase activity; C:cytoplasm; P:regulation of translational fidelity; F:aminoacyl-tRNA editing activity; P:tRNA metabolic process; P:D-amino acid catabolic process
CGI_10025924	transport Sec24C-like isoform X2	2883	0.869	F:zinc ion binding; P:ER to Golgi vesicle-mediated transport; P:intracellular protein transport; C:COPII vesicle coat		IPR007123 (PFAM); IPR006895 (PFAM); IPR006900 (PFAM); G3DSA:2.60.40.1670 (GENE3D); IPR012990 (PFAM); IPR006896 (PFAM); IPR029006 (G3DSA:3.40.20.GENE3D); IPR002035 (G3DSA:3.40.50.GENE3D); PTHR13803:SF5 (PANTHER); PTHR13803 (PANTHER); IPR006895 (SUPERFAMILY); IPR007123 (SUPERFAMILY); SSF81995 (SUPERFAMILY); IPR006900 (SUPERFAMILY); IPR002035 (SUPERFAMILY)
CGI_10015917	Calreticulin	1614	0.902	F:calcium ion binding; C:endoplasmic reticulum; F:unfolded protein binding; P:protein folding		IPR001580 (PRINTS); IPR009033 (G3DSA:2.10.250.GENE3D); IPR001580 (PFAM); IPR013320 (G3DSA:2.60.120.GENE3D); IPR001580 (PANTHER); PTHR11073:SF16 (PANTHER); IPR009033 (SUPERFAMILY); IPR013320 (SUPERFAMILY)
CGI_10005465	hypothetical protein CGI_10005465	357	0.922	C:integral component of membrane
CGI_10027377	protocadherin Fat 4-like	1173	0.5525	C:integral component of membrane		no IPS match
CGI_10008013	metallo-beta-lactamase domain-containing 1-like [Crassostrea gigas]	693	0.7675
CGI_10002436	hypothetical protein CGI_10002436	366	0.8
CGI_10002395	calpain-B-like isoform X1 [Priapulus caudatus]	2325	0.678	F:calcium ion binding; P:proteolysis; F:calcium-dependent cysteine-type endopeptidase activity; C:intracellular		IPR022684 (PRINTS); IPR022683 (SMART); IPR001300 (SMART); IPR022682 (PFAM); G3DSA:2.60.120.380 (GENE3D); G3DSA:3.90.70.10 (GENE3D); IPR011992 (G3DSA:1.10.238.GENE3D); IPR001300 (PFAM); PTHR10183:SF310 (PANTHER); PTHR10183 (PANTHER); IPR001300 (PROSITE_PROFILES); IPR002048 (PROSITE_PROFILES); SSF54001 (SUPERFAMILY); IPR022682 (SUPERFAMILY); IPR011992 (SUPERFAMILY)
CGI_10024789	zinc transporter ZIP1-like	825	0.668	P:transmembrane transport; C:integral component of membrane; C:cell part; F:metal ion transmembrane transporter activity; P:metal ion transport
CGI_10020749	neuromedin-U receptor 2-like [Octopus bimaculoides]	1596	0.547	F:G-protein coupled receptor activity; P:G-protein coupled receptor signaling pathway; C:integral component of membrane
CGI_10023872	mitochondrial chaperone BCS1	1263	0.815	F:ATP binding; P:mitochondrial respiratory chain complex IV assembly; P:mitochondrial respiratory chain complex III assembly; C:mitochondrion; C:integral component of membrane; P:mitochondrial respiratory chain complex I assembly
CGI_10019403	46 kDa FK506-binding nuclear -like isoform X2	1488	0.7955	C:endoplasmic reticulum membrane; F:peptidyl-prolyl cis-trans isomerase activity; F:FK506 binding; P:chaperone-mediated protein folding; P:protein peptidyl-prolyl isomerization	EC:5.2.1.8
CGI_10023789	hypothetical protein CGI_10023789	780	0.875			no IPS match
CGI_10026535	staphylococcal nuclease domain-containing 1-like	3237	0.8	F:GTP binding; F:transcription cofactor activity; P:posttranscriptional gene silencing by RNA; C:cytoplasm; P:small GTPase mediated signal transduction; C:membrane; P:protein transport; C:RISC complex; P:regulation of nucleic acid-templated transcription		PR00449 (PRINTS); SM00173 (SMART); SM00174 (SMART); SM00175 (SMART); IPR016685 (PIRSF); IPR016071 (SMART); IPR002999 (SMART); IPR027417 (G3DSA:3.40.50.GENE3D); IPR016071 (G3DSA:2.40.50.GENE3D); IPR005225 (TIGRFAM); G3DSA:2.30.30.140 (GENE3D); IPR016071 (PFAM); IPR016071 (G3DSA:2.40.50.GENE3D); IPR001806 (PFAM); IPR002999 (PFAM); PTHR12302 (PANTHER); IPR030481 (PTHR12302:PANTHER); IPR020849 (PROSI…
CGI_10023107	Toll-like receptor 6	1845	0.504	P:signal transduction; C:integral component of membrane
CGI_10009981	sodium- and chloride-dependent glycine transporter 1-like	2079	0.731	P:neurotransmitter transport; F:neurotransmitter:sodium symporter activity; P:transmembrane transport; C:integral component of membrane
CGI_10027949	ATP-binding cassette sub-family A member 3-like	846	0.7365	F:ATPase activity; F:ATP binding; P:metabolic process; C:integral component of membrane; P:transport; F:transporter activity	EC:3.6.1.3	IPR027417 (G3DSA:3.40.50.GENE3D); IPR026082 (PANTHER); PTHR19229:SF36 (PANTHER)
CGI_10028644	cdc42 homolog	615	0.574	F:GTP binding; P:small GTPase mediated signal transduction; C:membrane; P:protein transport; C:intracellular		PR00449 (PRINTS); SM00174 (SMART); SM00175 (SMART); SM00173 (SMART); IPR001806 (PFAM); IPR005225 (TIGRFAM); IPR027417 (G3DSA:3.40.50.GENE3D); PTHR24072 (PANTHER); PS51420 (PROSITE_PROFILES); IPR027417 (SUPERFAMILY)
CGI_10003171	RNA 3 -terminal phosphate cyclase	1116	0.845	F:RNA-3'-phosphate cyclase activity; P:ribosome biogenesis; P:RNA processing; C:nucleolus	EC:6.5.1.4
CGI_10010444	Hepatocyte growth factor	342	0.609	C:platelet alpha granule lumen; P:protein metabolic process; F:identical protein binding; P:positive regulation of phosphatidylinositol 3-kinase signaling; P:negative regulation of release of cytochrome c from mitochondria; P:positive chemotaxis; P:negative regulation of hydrogen peroxide-mediated programmed cell death; F:chemoattractant activity; F:peptidase activity; P:positive regulation of de…		PR00018 (PRINTS); IPR000001 (SMART); IPR000001 (PFAM); G3DSA:2.40.20.10 (GENE3D); PTHR24256 (PANTHER); PTHR24256:SF162 (PANTHER); IPR000001 (PROSITE_PROFILES); IPR013806 (SUPERFAMILY)
CGI_10021957	aspartate--tRNA cytoplasmic-like	1596	0.875	F:ATP binding; C:extracellular exosome; C:cytoplasm; C:membrane; F:aspartate-tRNA ligase activity; P:aspartyl-tRNA aminoacylation; F:poly(A) RNA binding	EC:6.1.1.12	IPR002312 (PRINTS); IPR004365 (PFAM); IPR004364 (PFAM); G3DSA:3.30.930.10 (GENE3D); IPR012340 (G3DSA:2.40.50.GENE3D); IPR004523 (TIGRFAM); IPR004523 (PTHR22594:PANTHER); IPR018150 (PANTHER); IPR006195 (PROSITE_PROFILES); IPR012340 (SUPERFAMILY); SSF55681 (SUPERFAMILY)
CGI_10003770	Baculoviral IAP repeat-containing 3	510	0.6895	F:zinc ion binding; C:integral component of membrane
CGI_10009318	tyrosinase tyr-3	2745	0.5875	F:oxidoreductase activity; F:metal ion binding; C:integral component of membrane; P:oxidation-reduction process
CGI_10026946	unhealthy ribosome biogenesis 2 homolog	4419	0.5135			IPR018849 (PFAM); PTHR15682 (PANTHER)
CGI_10007075	ubiquitin-like modifier-activating enzyme 5	1188	0.868	C:nucleus; F:ATP binding; F:metal ion binding; P:cyclic threonylcarbamoyladenosine biosynthetic process; C:cytosol; P:regulation of intracellular estrogen receptor signaling pathway; F:UFM1 activating enzyme activity; P:protein K69-linked ufmylation; P:response to endoplasmic reticulum stress; F:tRNA threonylcarbamoyladenosine dehydratase
CGI_10025663	prohibitin-2	747	0.9325	C:integral component of membrane		IPR000163 (PRINTS); IPR001107 (SMART); IPR001107 (PFAM); IPR021017 (PFAM); IPR000163 (PANTHER); PTHR23222:SF1 (PANTHER); IPR001107 (SUPERFAMILY)
CGI_10019151	transcription factor IIIB 50 kDa subunit	1506	0.464	F:zinc ion binding; P:regulation of transcription, DNA-templated; P:DNA-templated transcription, initiation
CGI_10016056	poly [ADP-ribose] polymerase 14-like	1857	0.6465	F:nucleotide binding		G3DSA:3.40.220.10 (GENE3D); IPR004170 (PFAM); PTHR14453 (PANTHER); PTHR14453:SF66 (PANTHER); IPR004170 (PROSITE_PROFILES); SSF52949 (SUPERFAMILY); SSF117839 (SUPERFAMILY)
CGI_10008864	U4 U6 small nuclear ribonucleo Prp4-like	1566	0.8085	F:U6 snRNA binding; P:chordate embryonic development; P:retina development in camera-type eye; C:U4/U6 x U5 tri-snRNP complex; C:viral nucleocapsid; F:U4 snRNA binding; P:mRNA splicing, via spliceosome		IPR020472 (PRINTS); IPR001680 (SMART); IPR014906 (SMART); IPR014906 (PFAM); IPR001680 (PFAM); IPR015943 (G3DSA:2.130.10.GENE3D); IPR027106 (PANTHER); IPR017986 (PROSITE_PROFILES); IPR001680 (PROSITE_PROFILES); IPR014906 (SUPERFAMILY); IPR017986 (SUPERFAMILY)
CGI_10023396	NFX1-type zinc finger-containing 1-like	5700	0.628	F:poly(A) RNA binding
CGI_10001553	eukaryotic initiation factor 4A-I	1341	0.785	F:translation initiation factor activity; F:ATP binding; P:regulation of gene expression; P:RNA secondary structure unwinding; P:translational initiation; F:ATP-dependent RNA helicase activity		IPR001650 (SMART); IPR014001 (SMART); IPR027417 (G3DSA:3.40.50.GENE3D); IPR027417 (G3DSA:3.40.50.GENE3D); IPR001650 (PFAM); IPR011545 (PFAM); PTHR24031 (PANTHER); PTHR24031:SF84 (PANTHER); IPR001650 (PROSITE_PROFILES); IPR014014 (PROSITE_PROFILES); IPR014001 (PROSITE_PROFILES); IPR027417 (SUPERFAMILY)
CGI_10017600	26S proteasome non-ATPase regulatory subunit 11	987	0.8985	C:nucleus; C:extracellular exosome; P:stem cell differentiation; C:proteasome regulatory particle; C:membrane; P:proteasome assembly; P:ubiquitin-dependent protein catabolic process		SM00753 (SMART); IPR000717 (SMART); IPR011991 (G3DSA:1.10.10.GENE3D); IPR011990 (G3DSA:1.25.40.GENE3D); IPR000717 (PFAM); PTHR10678 (PANTHER); PTHR10678:SF2 (PANTHER); IPR011991 (SUPERFAMILY)
CGI_10028414	Kielin chordin	2205	0.529	C:membrane; P:transport
CGI_10015302	Kelch domain-containing 4	1404	0.755
CGI_10016224	hypothetical protein CGI_10016224	450	1
CGI_10009891	TPR and ankyrin repeat-containing 1-like	3606	0.674	P:ion transport; C:membrane; C:integral component of membrane		IPR019734 (SMART); IPR011990 (G3DSA:1.25.40.GENE3D); IPR020683 (G3DSA:1.25.40.GENE3D); IPR011990 (G3DSA:1.25.40.GENE3D); IPR011990 (G3DSA:1.25.40.GENE3D); PTHR22904 (PANTHER); IPR013026 (PROSITE_PROFILES); IPR002110 (PROSITE_PROFILES); IPR020683 (PROSITE_PROFILES); IPR020683 (SUPERFAMILY); IPR011990 (SUPERFAMILY)
CGI_10019038	hypothetical protein CGI_10019038	477	0.9567	C:integral component of membrane
CGI_10028182	mitochondrial import inner membrane translocase subunit TIM44	369	0.728	C:mitochondrion; C:membrane; P:protein transport
CGI_10028703	hypothetical protein CGI_10028703	477	0.7883	P:signal transduction		IPR000157 (G3DSA:3.40.50.GENE3D); IPR000157 (SUPERFAMILY)
CGI_10008458	hypothetical protein CGI_10008458	477	0.7187	F:nucleic acid binding
CGI_10001561	cartilage matrix -like	1170	0.7015	C:collagen trimer; F:calcium ion binding		PR00010 (PRINTS); PR00453 (PRINTS); IPR002035 (SMART); IPR001881 (SMART); IPR000742 (SMART); G3DSA:2.10.25.10 (GENE3D); IPR000742 (PFAM); IPR002035 (G3DSA:3.40.50.GENE3D); IPR002035 (PFAM); IPR002035 (G3DSA:3.40.50.GENE3D); G3DSA:2.10.25.10 (GENE3D); PTHR24033 (PANTHER); IPR000742 (PROSITE_PROFILES); IPR002035 (PROSITE_PROFILES); IPR000742 (PROSITE_PROFILES); IPR002035 (PROSITE_PROFILES); SSF5719…
CGI_10018151	Tripartite motif-containing 45	1245	0.614	F:zinc ion binding; C:intracellular		IPR011042 (G3DSA:2.120.10.GENE3D); SSF101898 (SUPERFAMILY)
CGI_10022727	growth arrest and DNA damage-inducible GADD45 beta	474	0.574	C:nucleus; P:regulation of cell cycle; P:response to stress		IPR004038 (PFAM); IPR024824 (PANTHER); PTHR10411:SF8 (PANTHER)
CGI_10004438	Midasin	5397	0.5325	F:ATPase activity; C:nucleus; P:metabolic process; P:ribosomal large subunit assembly	EC:3.6.1.3
CGI_10028928	peptidase M20 domain-containing 2-like	1368	0.688	P:metabolic process; F:hydrolase activity		G3DSA:3.40.630.10 (GENE3D); IPR017439 (TIGRFAM); IPR011650 (PFAM); IPR011650 (G3DSA:3.30.70.GENE3D); PTHR30575 (PANTHER); PTHR30575:SF0 (PANTHER); SSF53187 (SUPERFAMILY); IPR011650 (SUPERFAMILY)
CGI_10022111	ribosomal S6 kinase beta-1-like	1476	0.784	F:ribosomal protein S6 kinase activity; C:nucleus; F:ATP binding; C:cytoplasm; P:protein phosphorylation; P:intracellular signal transduction	EC:2.7.11	IPR000719 (SMART); IPR016238 (PIRSF); IPR000961 (SMART); IPR000719 (PFAM); G3DSA:1.10.510.10 (GENE3D); IPR011993 (G3DSA:2.30.29.GENE3D); G3DSA:3.30.200.20 (GENE3D); IPR017892 (PFAM); PTHR24351 (PANTHER); PTHR24351:SF39 (PANTHER); IPR000961 (PROSITE_PROFILES); IPR000719 (PROSITE_PROFILES); IPR011009 (SUPERFAMILY)
CGI_10014926	AT-rich interactive domain-containing 1B-like	459	0.6357			no IPS match
CGI_10026437	PREDICTED: uncharacterized protein LOC105326491 [Crassostrea gigas]	597	1			no IPS match
CGI_10019057	disulfide-isomerase A4	1869	0.736	F:protein disulfide isomerase activity; P:metabolic process; C:endoplasmic reticulum; P:cell redox homeostasis; P:protein folding; P:response to endoplasmic reticulum stress	EC:5.3.4.1	PR00421 (PRINTS); IPR012336 (G3DSA:3.40.30.GENE3D); PF13848 (PFAM); IPR005792 (TIGRFAM); IPR012336 (G3DSA:3.40.30.GENE3D); IPR013766 (PFAM); IPR012336 (G3DSA:3.40.30.GENE3D); IPR005788 (TIGRFAM); PTHR18929 (PANTHER); PTHR18929:SF110 (PANTHER); IPR013766 (PROSITE_PROFILES); IPR012336 (SUPERFAMILY); IPR012336 (SUPERFAMILY); IPR012336 (SUPERFAMILY); IPR012336 (SUPERFAMILY); IPR012336 (SUPERFAMILY)
CGI_10026096	PREDICTED: uncharacterized protein LOC105342667 [Crassostrea gigas]	966	0.99			no IPS match
CGI_10000466	Ephrin type-A receptor partial	807	0.652	F:ATP binding; P:peptidyl-tyrosine phosphorylation; C:cytoskeleton; F:non-membrane spanning protein tyrosine kinase activity; F:calcium ion binding	EC:2.7.10.2	IPR001245 (PRINTS); PIRSF000654 (PIRSF); IPR001245 (PFAM); G3DSA:3.30.200.20 (GENE3D); G3DSA:1.10.510.10 (GENE3D); PTHR24418 (PANTHER); IPR000719 (PROSITE_PROFILES); IPR011009 (SUPERFAMILY)
CGI_10021819	LTV1 homolog	1332	0.658			IPR007307 (PFAM); PTHR21531 (PANTHER)
CGI_10010854	Wnt-8b	1011	0.6625	P:multicellular organism development; P:Wnt signaling pathway; F:receptor binding; C:proteinaceous extracellular matrix
CGI_10016150	oligodendrocyte transcription factor 3-like	807	0.7775	F:transcription factor activity, sequence-specific DNA binding; P:neuron differentiation; P:regulation of transcription, DNA-templated; F:protein dimerization activity; P:myelination; P:oligodendrocyte cell fate specification; P:regulation of neuron differentiation
CGI_10003482	tripartite motif-containing 45-like	1125	0.6564	F:zinc ion binding; C:intracellular		IPR000315 (PROSITE_PROFILES)
CGI_10007251	hypothetical protein CGI_10007251	591	1
CGI_10011908	Alpha- kinase vwkA	783	0.4838	F:ATP binding; F:protein serine/threonine kinase activity; P:protein phosphorylation	EC:2.7.11
CGI_10028754	girdin-like [Crassostrea gigas]	1875	0.8625	F:zinc ion binding		IPR001876 (SMART); IPR001876 (PFAM); IPR001876 (G3DSA:4.10.1060.GENE3D); IPR001876 (PROSITE_PROFILES); IPR001876 (SUPERFAMILY)
CGI_10013574	Coiled-coil domain-containing 58	408	0.728	C:mitochondrion		IPR019171 (PFAM); PTHR31905 (PANTHER)
CGI_10004164	Stress-induced 1	717	0.613			IPR008978 (G3DSA:2.60.40.GENE3D); IPR002068 (PFAM); IPR002068 (PROSITE_PROFILES); IPR008978 (SUPERFAMILY); IPR008978 (SUPERFAMILY)
CGI_10009549	PREDICTED: uncharacterized protein LOC105339089 [Crassostrea gigas]	729	0.625	C:integral component of membrane
CGI_10027975	midnolin [Chrysemys picta bellii]	1068	0.548	C:nucleus; C:cytosol; C:nucleolus
CGI_10009319	tyrosinase tyr-3	2448	0.5775	F:oxidoreductase activity; F:metal ion binding; P:oxidation-reduction process
CGI_10022372	E3 ubiquitin- ligase RNF213	12450	0.7015	F:ATPase activity; F:ubiquitin-protein transferase activity; F:zinc ion binding; P:protein ubiquitination	EC:3.6.1.3	IPR003593 (SMART); IPR027417 (G3DSA:3.40.50.GENE3D); IPR027417 (G3DSA:3.40.50.GENE3D); IPR013083 (G3DSA:3.30.40.GENE3D); PTHR22605 (PANTHER); IPR031248 (PTHR22605:PANTHER); IPR001841 (PROSITE_PROFILES); IPR027417 (SUPERFAMILY); SSF57850 (SUPERFAMILY); IPR027417 (SUPERFAMILY)
CGI_10027660	hypothetical protein CGI_10027660	9972	0.4813
CGI_10017744	Leucine-rich repeats and immunoglobulin-like domains 3	501	0.67	F:calcium ion binding
CGI_10003332	exportin-T isoform X1 [Heterocephalus glaber]	2982	0.764	C:cytoplasm; C:nuclear matrix; F:tRNA binding; F:Ran GTPase binding; F:nucleobase-containing compound transmembrane transporter activity; P:tRNA re-export from nucleus; C:nuclear pore
CGI_10006403	Intron-binding aquarius	4197	0.8275	C:catalytic step 2 spliceosome; C:membrane; F:poly(A) RNA binding; P:mRNA splicing, via spliceosome
CGI_10024132	eukaryotic peptide chain release factor subunit 1	1332	0.9525	P:translational termination; C:cytoplasm; F:translation release factor activity, codon specific		IPR005140 (SMART); IPR005140 (PFAM); G3DSA:3.30.420.60 (GENE3D); IPR029064 (G3DSA:3.30.1330.GENE3D); IPR005141 (PFAM); IPR024049 (G3DSA:3.30.960.GENE3D); IPR005142 (PFAM); IPR004403 (TIGRFAM); IPR004403 (PANTHER); IPR024049 (SUPERFAMILY); SSF53137 (SUPERFAMILY); IPR029064 (SUPERFAMILY)
CGI_10010569	nucleolar MIF4G domain-containing 1-like [Biomphalaria glabrata]	2454	0.7165	C:nucleus; F:RNA binding
CGI_10015451	galectin-4-like isoform X1 [Crassostrea gigas]	1620	0.6545	F:carbohydrate binding
CGI_10018828	Cat eye syndrome critical region 5	1206	0.684	C:mitochondrion; P:glycerophospholipid biosynthetic process		IPR023214 (G3DSA:3.40.50.GENE3D); IPR006357 (PFAM); IPR006357 (TIGRFAM); IPR006353 (TIGRFAM); PTHR14269 (PANTHER); PTHR14269:SF16 (PANTHER); IPR023214 (SUPERFAMILY)
CGI_10004656	Serine threonine- kinase TBK1	5166	0.673	F:DNA binding; F:translation initiation factor activity; F:ATP binding; F:zinc ion binding; F:protein heterodimerization activity; F:protein kinase activity; P:translational initiation; P:protein phosphorylation
CGI_10019179	C-C chemokine receptor type 8-like	867	0.669	P:negative regulation of catalytic activity; F:enzyme inhibitor activity; C:integral component of membrane		IPR006150 (SMART); IPR028150 (PFAM); G3DSA:1.20.1070.10 (GENE3D); IPR017452 (PROSITE_PROFILES); SSF81321 (SUPERFAMILY)
CGI_10005004	probable RNA-binding 18	789	0.6755	F:nucleotide binding; F:nucleic acid binding		IPR000504 (SMART); IPR012677 (G3DSA:3.30.70.GENE3D); IPR000504 (PFAM); PTHR21245:SF2 (PANTHER); PTHR21245 (PANTHER); IPR000504 (PROSITE_PROFILES); IPR012677 (SUPERFAMILY)
CGI_10004552	cysteine and histidine-rich domain-containing 1	978	0.689	P:regulation of centrosome duplication; F:metal ion binding		IPR008978 (G3DSA:2.60.40.GENE3D); IPR007052 (PFAM); IPR007051 (PFAM); PTHR12621 (PANTHER); PTHR12621:SF9 (PANTHER); IPR007052 (PROSITE_PROFILES); IPR007051 (PROSITE_PROFILES); IPR008978 (SUPERFAMILY)
CGI_10023394	zinc finger 675-like isoform X1 [Crassostrea gigas]	3636	0.699	F:nucleic acid binding; F:GTP binding; F:metal ion binding
CGI_10013744	tripartite motif-containing 2-like	1140	0.655	F:zinc ion binding; P:metabolic process; C:intracellular; F:ligase activity
CGI_10011449	hypothetical protein CGI_10011449	1650	0.7235	C:membrane		PTHR34415:SF1 (PANTHER); PTHR34415 (PANTHER)
CGI_10007247	tumor necrosis factor receptor superfamily member 19-like	5040	0.7867	C:integral component of membrane
CGI_10025119	cell wall integrity and stress response component 4-like	849	0.7065	C:integral component of membrane; C:viral capsid		IPR004302 (PFAM); PTHR21113 (PANTHER)
CGI_10008445	Ubox domain containing [Acanthamoeba castellanii Neff]	1584	0.6735	F:GTP binding; F:ubiquitin-protein transferase activity; P:signal transduction; C:membrane; P:protein ubiquitination
CGI_10027858	transport Sec23A	2334	0.9125	F:GTP binding; F:zinc ion binding; P:ER to Golgi vesicle-mediated transport; P:SRP-dependent cotranslational protein targeting to membrane; C:signal recognition particle; F:GTPase activity; P:metabolic process; F:7S RNA binding; C:COPII vesicle coat		IPR012990 (PFAM); IPR029006 (G3DSA:3.40.20.GENE3D); IPR002035 (G3DSA:3.40.50.GENE3D); IPR007123 (PFAM); IPR006896 (PFAM); G3DSA:2.60.40.1670 (GENE3D); IPR006900 (PFAM); IPR006895 (PFAM); PTHR11141:SF7 (PANTHER); PTHR11141 (PANTHER); IPR002035 (SUPERFAMILY); SSF81995 (SUPERFAMILY); IPR007123 (SUPERFAMILY); IPR006895 (SUPERFAMILY); IPR006900 (SUPERFAMILY)
CGI_10006932	probable methyltransferase TARBP1	4470	0.5745	F:RNA methyltransferase activity; P:RNA methylation; F:RNA binding; P:RNA processing	EC:2.1.1
CGI_10025889	Multiple epidermal growth factor-like domains 6	1452	0.5465	C:integral component of membrane
CGI_10009256	cullin-2 [Maylandia zebra]	2343	0.7645	F:ubiquitin protein ligase binding; C:cullin-RING ubiquitin ligase complex; P:multicellular organism development; P:ubiquitin-dependent protein catabolic process
CGI_10010206	tumor necrosis factor receptor-associated factor 6	1812	0.6485	F:ubiquitin-protein transferase activity; F:zinc ion binding; P:signal transduction; P:regulation of apoptotic process; P:protein ubiquitination
CGI_10011160	eukaryotic peptide chain release factor GTP-binding subunit ERF3A-like isoform X2	1668	0.809	F:GTP binding; F:translation release factor activity; F:GTPase activity; P:cytoplasmic translational termination; C:translation release factor complex		IPR000795 (PRINTS); IPR027417 (G3DSA:3.40.50.GENE3D); G3DSA:2.40.30.10 (GENE3D); IPR004160 (PFAM); G3DSA:2.40.30.10 (GENE3D); PF00009 (PFAM); PTHR23115 (PANTHER); PTHR23115:SF36 (PANTHER); IPR000795 (PROSITE_PROFILES); IPR009000 (SUPERFAMILY); IPR027417 (SUPERFAMILY); IPR009001 (SUPERFAMILY)
CGI_10028310	cytochrome P450 2C14-like isoform X2 [Crassostrea gigas]	1059	0.7715	F:oxidoreductase activity, acting on paired donors, with incorporation or reduction of molecular oxygen, reduced flavin or flavoprotein as one donor, and incorporation of one atom of oxygen; F:iron ion binding; P:oxidation-reduction process; F:heme binding	EC:1.14.14	IPR001128 (PRINTS); IPR008069 (PRINTS); IPR002401 (PRINTS); IPR001128 (G3DSA:1.10.630.GENE3D); IPR001128 (PFAM); PTHR24300 (PANTHER); IPR001128 (SUPERFAMILY)
CGI_10025411	Nuclear transcription factor Y subunit alpha	1017	0.612	C:CCAAT-binding factor complex; F:DNA binding; F:transcription factor activity, sequence-specific DNA binding; P:metabolic process; P:regulation of transcription, DNA-templated; F:N-acetyltransferase activity		IPR025924 (PFAM); PTHR30289 (PANTHER)
CGI_10018512	insulin-like growth factor-binding complex acid labile subunit isoform X2 [Crassostrea gigas]	822	0.549	F:calcium ion binding; C:membrane; C:integral component of membrane
CGI_10006885	PREDICTED: uncharacterized protein LOC105337665	729	1
CGI_10011517	probable assembly chaperone of rpl4	1068	0.695
CGI_10016546	von Willebrand factor type EGF and pentraxin domain-containing 1	1494	0.538	P:response to stress		IPR011641 (SMART); G3DSA:2.10.50.10 (GENE3D); IPR011641 (PFAM); PTHR22727 (PANTHER); IPR003609 (PROSITE_PROFILES); IPR009030 (SUPERFAMILY); SSF57414 (SUPERFAMILY); IPR009030 (SUPERFAMILY)
CGI_10016514	pro convertase subtilisin kexin type 5-like [Lingula anatina]	1698	0.3995	C:membrane; C:integral component of membrane; P:phosphorylation; F:kinase activity		IPR009030 (SUPERFAMILY)
CGI_10021732	chorion peroxidase-like	591	0.744	F:peroxidase activity; P:response to oxidative stress; P:cellular oxidant detoxification; P:oxidation-reduction process; F:heme binding	EC:1.11.1.7
CGI_10019855	NAD-dependent deacylase sirtuin- mitochondrial isoform X1 [Mustela putorius furo]	723	0.795	P:peptidyl-lysine demalonylation; F:metal ion binding; F:protein-malonyllysine demalonylase activity; F:protein-succinyllysine desuccinylase activity; C:cytosol; P:regulation of ketone biosynthetic process; C:membrane-enclosed lumen; P:peptidyl-lysine desuccinylation; P:protein deglutarylation; C:mitochondrial envelope; F:NAD+ binding		IPR003000 (PFAM); IPR029035 (G3DSA:3.40.50.GENE3D); IPR026591 (G3DSA:3.30.1600.GENE3D); PTHR11085:SF24 (PANTHER); IPR003000 (PANTHER); IPR026590 (PROSITE_PROFILES); IPR029035 (SUPERFAMILY)
CGI_10024290	PREDICTED: uncharacterized protein LOC105321549 [Crassostrea gigas]	942	1			no IPS match
CGI_10020878	hypothetical protein CGI_10020878	273	0.795	C:integral component of membrane		no IPS match
CGI_10024351	replication associated [Lake Sarah-associated circular molecule 6]	633	0.671	F:ATPase activity, uncoupled; F:endodeoxyribonuclease activity, producing 5'-phosphomonoesters; F:nucleotidyltransferase activity; P:DNA replication; P:protein-DNA covalent cross-linking	EC:3.1.21	IPR003365 (PFAM); G3DSA:3.40.1310.20 (GENE3D)
CGI_10010839	hypothetical protein CGI_10010839	153	1			no IPS match
CGI_10006353	linear gramicidin synthase subunit D-like	4137	0.7315	F:oxidoreductase activity; P:oxidation-reduction process; F:phosphopantetheine binding
CGI_10002791	hypothetical protein CGI_10002791	417	0.9225	F:GTP binding; C:membrane
CGI_10026675	canopy homolog 2	672	0.629
CGI_10023347	dolichyl-diphosphooligosaccharide-- glycosyltransferase subunit 1	1809	0.79	C:oligosaccharyltransferase complex; F:dolichyl-diphosphooligosaccharide-protein glycotransferase activity; C:integral component of membrane; P:protein N-linked glycosylation via asparagine	EC:2.4.1.119	PF14966 (PFAM); IPR007676 (PFAM); IPR007676 (PANTHER); PTHR21049:SF0 (PANTHER)
CGI_10011953	interferon-induced 44-like [Crassostrea gigas]	1572	0.905	F:GTP binding		IPR006571 (SMART); IPR006571 (PFAM); IPR027417 (G3DSA:3.40.50.GENE3D); PTHR14241 (PANTHER); IPR027417 (SUPERFAMILY)
CGI_10016937	innexin unc-9-like isoform X1 [Crassostrea gigas]	1266	0.6125	C:gap junction; P:ion transport; C:integral component of membrane; C:plasma membrane		IPR000990 (PRINTS); IPR000990 (PFAM); IPR000990 (PANTHER); IPR000990 (PROSITE_PROFILES)
CGI_10021171	interferon regulatory factor 2	1152	0.7455	P:cell proliferation; F:transcription factor activity, sequence-specific DNA binding; P:regulation of transcription, DNA-templated; F:regulatory region DNA binding
CGI_10005346	FK506-binding 2 isoform X2	732	0.69	F:calcium ion binding; P:protein folding		IPR002048 (PFAM); IPR011992 (G3DSA:1.10.238.GENE3D); G3DSA:3.10.50.40 (GENE3D); IPR001179 (PFAM); PTHR10516:SF306 (PANTHER); IPR023566 (PANTHER); IPR001179 (PROSITE_PROFILES); IPR002048 (PROSITE_PROFILES); SSF54534 (SUPERFAMILY); IPR011992 (SUPERFAMILY)
CGI_10003602	deoxyhypusine synthase	1092	0.8585	P:deoxyhypusine biosynthetic process from spermidine; F:protein binding; P:protein homotetramerization; P:glucose homeostasis; C:cytosol; F:deoxyhypusine synthase activity; P:positive regulation of T cell proliferation; P:peptidyl-lysine modification to peptidyl-hypusine; P:translation	EC:2.5.1.46
CGI_10012001	nuclear transcription factor Y subunit alpha isoform X4	1134	0.7855	C:CCAAT-binding factor complex; F:transcription factor activity, sequence-specific DNA binding; C:protein-DNA complex; F:transcription regulatory region DNA binding; P:regulation of transcription, DNA-templated; C:nucleoplasm		IPR001289 (PRINTS); IPR001289 (SMART); IPR001289 (PFAM); IPR001289 (PANTHER); IPR001289 (PROSITE_PROFILES)
CGI_10018397	Tripartite motif-containing 56 [Crassostrea gigas]	2133	0.4305	F:zinc ion binding; C:intracellular		IPR001841 (SMART); IPR011042 (G3DSA:2.120.10.GENE3D); IPR013083 (G3DSA:3.30.40.GENE3D); IPR027370 (PFAM); PTHR24103 (PANTHER); PTHR24103:SF285 (PANTHER); IPR000315 (PROSITE_PROFILES); IPR001841 (PROSITE_PROFILES); SSF57845 (SUPERFAMILY); SSF63829 (SUPERFAMILY); SSF57850 (SUPERFAMILY)
CGI_10005542	transient receptor potential cation channel subfamily M member 2-like isoform X2 [Crassostrea gigas]	702	0.7463	P:metabolic process; C:integral component of membrane; F:hydrolase activity
CGI_10012708	hypothetical protein CGI_10012708	795	0.6373	C:integral component of membrane
CGI_10015932	ADP-ribosylation factor-like	573	0.808	F:GTP binding; P:small GTPase mediated signal transduction; P:protein transport; C:intracellular		IPR006689 (PRINTS); SM00177 (SMART); SM00178 (SMART); IPR005225 (TIGRFAM); IPR027417 (G3DSA:3.40.50.GENE3D); IPR006689 (PFAM); PTHR11711 (PANTHER); IPR024156 (PROSITE_PROFILES); IPR027417 (SUPERFAMILY)
CGI_10009560	C-type lectin lectoxin-Lio3- partial	1536	0.6325	C:integral component of membrane		IPR001304 (SMART); IPR016186 (G3DSA:3.10.100.GENE3D); IPR001304 (PFAM); PTHR22802 (PANTHER); IPR001304 (PROSITE_PROFILES); IPR016187 (SUPERFAMILY)
CGI_10016399	nicotinate phosphoribosyltransferase isoform X2	1656	0.8395	F:nicotinate-nucleotide diphosphorylase (carboxylating) activity; F:nicotinate phosphoribosyltransferase activity; P:NAD biosynthetic process; P:nicotinate nucleotide salvage; F:ligase activity	EC:2.4.2.19; EC:2.4.2.11	IPR007229 (PIRSF); G3DSA:3.20.140.10 (GENE3D); IPR006405 (TIGRFAM); IPR007229 (PFAM); PTHR11098:SF1 (PANTHER); IPR007229 (PANTHER); SSF54675 (SUPERFAMILY); IPR002638 (SUPERFAMILY)
CGI_10015344	Guanine nucleotide-binding -like 3 partial	1734	0.802	F:GTP binding; F:GTPase activity; P:ribosome biogenesis; C:nucleolus		IPR006073 (PRINTS); IPR006073 (PFAM); IPR027417 (G3DSA:3.40.50.GENE3D); IPR023179 (G3DSA:1.10.1580.GENE3D); PTHR11089:SF27 (PANTHER); PTHR11089:SF27 (PANTHER); PTHR11089 (PANTHER); PTHR11089 (PANTHER); IPR030378 (PROSITE_PROFILES); IPR027417 (SUPERFAMILY)
CGI_10018536	Arrestin domain-containing 2	1248	0.8125	C:membrane		no IPS match
CGI_10005904	Lupus La	1656	0.657	F:nucleotide binding; C:nucleus; F:RNA binding; C:intracellular ribonucleoprotein complex; P:RNA processing
CGI_10016920	small subunit processome component 20 homolog	3312	0.606	C:intracellular part		IPR011430 (PFAM); IPR011989 (G3DSA:1.25.10.GENE3D); PTHR17695:SF11 (PANTHER); PTHR17695 (PANTHER); IPR016024 (SUPERFAMILY)
CGI_10024302	hypothetical protein CGI_10024302	414	1			no IPS match
CGI_10023425	tetratricopeptide repeat 40 isoform X1 [Chrysemys picta bellii]	1668	0.7555
CGI_10018892	solute carrier family 13 member 5-like [Crassostrea gigas]	1383	0.593	P:sodium ion transport; P:transmembrane transport; C:integral component of membrane; F:transporter activity
CGI_10004377	substance-P receptor-like	1221	0.674	P:neuropeptide signaling pathway; C:integral component of membrane; F:neuropeptide Y receptor activity
CGI_10017011	26S proteasome non-ATPase regulatory subunit 12-like	1362	0.8555	P:proteasome-mediated ubiquitin-dependent protein catabolic process; C:extracellular exosome; C:cytoplasm; C:membrane; C:proteasome regulatory particle, lid subcomplex; C:nuclear proteasome complex		IPR000717 (SMART); SM00753 (SMART); IPR011991 (G3DSA:1.10.10.GENE3D); IPR000717 (PFAM); PTHR10855 (PANTHER); PTHR10855:SF1 (PANTHER); IPR011991 (SUPERFAMILY)
CGI_10011376	heat shock 20	510	0.7065	C:Z disc; P:regulation of autophagy; P:protein lipidation; C:cytosol; P:regulation of translational initiation by eIF2 alpha phosphorylation; C:nucleoplasm		IPR001436 (PRINTS); IPR001436 (PIRSF); IPR002068 (PFAM); IPR008978 (G3DSA:2.60.40.GENE3D); IPR031107 (PANTHER); PTHR11527:SF31 (PANTHER); IPR002068 (PROSITE_PROFILES); IPR008978 (SUPERFAMILY)
CGI_10012981	zinc finger 598-like	927	0.726	F:zinc ion binding		IPR015880 (SMART); PF13920 (PFAM); IPR013083 (G3DSA:3.30.40.GENE3D); PTHR22938 (PANTHER); PTHR22938:SF0 (PANTHER); IPR001841 (PROSITE_PROFILES); SSF57850 (SUPERFAMILY)
CGI_10015082	thyroid adenoma-associated isoform X1 [Bos taurus]	5817	0.5765			IPR019442 (PFAM); PTHR14387 (PANTHER); IPR016024 (SUPERFAMILY)
CGI_10015916	Calreticulin	1008	0.8805	P:cell cycle arrest; P:negative regulation of intracellular steroid hormone receptor signaling pathway; P:positive regulation of cell proliferation; P:cellular senescence; C:external side of plasma membrane; P:negative regulation of neuron differentiation; P:positive regulation of cell cycle; F:integrin binding; P:positive regulation of DNA replication; C:polysome; P:negative regulation of transc…		IPR001580 (PRINTS); IPR009033 (G3DSA:2.10.250.GENE3D); IPR001580 (PFAM); IPR013320 (G3DSA:2.60.120.GENE3D); IPR001580 (PANTHER); PTHR11073:SF16 (PANTHER); IPR013320 (SUPERFAMILY); IPR009033 (SUPERFAMILY)
CGI_10002381	E3 ubiquitin- ligase DTX3L	2121	0.6695	F:zinc ion binding
CGI_10015300	tRNA (cytosine(34)-C(5))-methyltransferase	2223	0.687	C:nucleus; F:RNA binding; F:tRNA (cytosine-5-)-methyltransferase activity; C:cytoplasm; P:tRNA methylation	EC:2.1.1
CGI_10025132	signal recognition particle receptor subunit beta	771	0.73	F:GTP binding; P:small GTPase mediated signal transduction; C:integral component of membrane; C:intracellular		SM00177 (SMART); IPR027417 (G3DSA:3.40.50.GENE3D); IPR019009 (PFAM); PTHR11485 (PANTHER); PTHR11485:SF24 (PANTHER); IPR024156 (PROSITE_PROFILES); IPR027417 (SUPERFAMILY)
CGI_10002034	disulfide-isomerase A4	735	0.803	F:protein disulfide isomerase activity; P:metabolic process; C:endoplasmic reticulum; P:cell redox homeostasis; P:protein folding	EC:5.3.4.1	IPR012336 (G3DSA:3.40.30.GENE3D); IPR005788 (TIGRFAM); IPR013766 (PFAM); PTHR18929 (PANTHER); PTHR18929:SF110 (PANTHER); IPR013766 (PROSITE_PROFILES); IPR012336 (SUPERFAMILY)
CGI_10015263	aryl hydrocarbon receptor nuclear translocator 1	1008	0.718	C:integral component of membrane; C:intracellular part
CGI_10019930	integrin beta-1-binding 1-like	528	0.638	P:integrin-mediated signaling pathway; P:regulation of localization; P:positive regulation of cellular process; P:regulation of cell adhesion; P:negative regulation of cellular process; C:intracellular part; P:regulation of cellular component organization		IPR011993 (G3DSA:2.30.29.GENE3D); IPR019517 (PFAM); PTHR32055:SF1 (PANTHER); PTHR32055 (PANTHER); IPR006020 (PROSITE_PROFILES); IPR011993 (SUPERFAMILY)
CGI_10021224	inosine triphosphate pyrophosphatase	570	0.799	F:nucleotide binding; F:dITP diphosphatase activity; F:XTP diphosphatase activity; P:ITP catabolic process; C:cytoplasm; F:metal ion binding; P:chromosome organization; F:ITP diphosphatase activity; P:deoxyribonucleoside triphosphate catabolic process	EC:3.6.1	IPR002637 (TIGRFAM); IPR002637 (PFAM); IPR029001 (G3DSA:3.90.950.GENE3D); IPR002637 (PANTHER); PTHR11067:SF9 (PANTHER); IPR027502 (HAMAP); IPR029001 (SUPERFAMILY)
CGI_10020475	inhibitor of nuclear factor-kappaB	1152	0.6975
CGI_10007759	apoptosis inhibitor 5 isoform X2	1578	0.7555			IPR011989 (G3DSA:1.25.10.GENE3D); IPR008383 (PFAM); PTHR12758 (PANTHER); PTHR12758:SF19 (PANTHER); IPR016024 (SUPERFAMILY)
CGI_10012129	major facilitator superfamily domain-containing 10-like	9498	0.8595	P:transmembrane transport; C:integral component of membrane; F:ADP binding; F:transporter activity		PR00364 (PRINTS); IPR019734 (SMART); G3DSA:1.20.1250.20 (GENE3D); IPR011701 (PFAM); IPR027417 (G3DSA:3.40.50.GENE3D); IPR002182 (PFAM); PTHR23504:SF31 (PANTHER); PTHR23504 (PANTHER); PTHR23504:SF31 (PANTHER); IPR027417 (SUPERFAMILY); IPR020846 (SUPERFAMILY); IPR027417 (SUPERFAMILY)
CGI_10001114	hypothetical protein CGI_10001114	3933	0.99			no IPS match
CGI_10006541	hypothetical protein CGI_10006541	429	0.975			no IPS match
CGI_10014628	arginine N-methyltransferase 1 isoform X1	1086	0.9045	F:protein-arginine omega-N asymmetric methyltransferase activity; P:histone arginine methylation; P:peptidyl-arginine methylation, to asymmetrical-dimethyl arginine; C:cytosol; P:regulation of transcription, DNA-templated; F:histone-arginine N-methyltransferase activity	EC:2.1.1.125
CGI_10006648	hypothetical protein CGI_10006648	420	1
CGI_10004657	ADP-ribosylation factor 6 isoform X1 [Anolis carolinensis]	567	0.868	P:intermembrane transport; P:small GTPase mediated signal transduction; P:regulation of Notch signaling pathway; P:protein transport; P:brain development; P:fat cell differentiation; P:visual perception; P:determination of left/right symmetry; P:gastrulation; P:regulation of smoothened signaling pathway; F:GTP binding; C:extracellular exosome; P:protein localization to nonmotile primary cilium; C…
CGI_10025596	dnaJ homolog subfamily C member 7-like	2217	0.84	F:heat shock protein binding; C:cytoskeleton; C:extracellular exosome; P:positive regulation of ATPase activity; P:regulation of cellular response to heat; C:membrane; C:cytosol; P:chaperone cofactor-dependent protein refolding; F:ATPase activator activity; C:nucleoplasm		IPR001623 (PRINTS); IPR019734 (SMART); IPR001148 (SMART); IPR001623 (SMART); IPR011990 (G3DSA:1.25.40.GENE3D); IPR011990 (G3DSA:1.25.40.GENE3D); IPR013105 (PFAM); IPR001623 (PFAM); IPR019734 (PFAM); IPR001148 (PFAM); IPR001148 (G3DSA:3.10.200.GENE3D); IPR001623 (G3DSA:1.10.287.GENE3D); IPR011990 (G3DSA:1.25.40.GENE3D); IPR023561 (PANTHER); IPR019734 (PROSITE_PROFILES); IPR001148 (PROSITE_PROFILES…
CGI_10012437	E3 ubiquitin- ligase HECTD1	2943	0.598	F:ubiquitin-protein transferase activity; F:metal ion binding; F:ligase activity; P:protein ubiquitination		IPR010606 (PFAM); IPR010606 (PROSITE_PROFILES); IPR002035 (SUPERFAMILY); SSF159034 (SUPERFAMILY); SSF159034 (SUPERFAMILY)
CGI_10005387	ER lumen -retaining receptor 2	573	0.95	C:endoplasmic reticulum membrane; C:cis-Golgi network; C:extracellular exosome; P:vesicle-mediated transport; P:protein transport; C:integral component of membrane; F:ER retention sequence binding; P:protein retention in ER lumen
CGI_10007608	Protocadherin-like wing polarity stan	2784	0.6135	F:calcium ion binding; C:integral component of membrane; P:homophilic cell adhesion via plasma membrane adhesion molecules; C:plasma membrane
CGI_10027347	coatomer subunit alpha isoform X2	3690	0.897	C:extracellular space; P:ER to Golgi vesicle-mediated transport; C:extracellular exosome; P:retrograde vesicle-mediated transport, Golgi to ER; F:structural molecule activity; P:intra-Golgi vesicle-mediated transport; P:intracellular protein transport; F:hormone activity; P:pancreatic juice secretion; C:COPI vesicle coat		IPR020472 (PRINTS); IPR001680 (SMART); IPR016391 (PIRSF); IPR015943 (G3DSA:2.130.10.GENE3D); IPR006692 (PFAM); IPR001680 (PFAM); IPR010714 (PFAM); PTHR19876:SF1 (PANTHER); PTHR19876 (PANTHER); IPR017986 (PROSITE_PROFILES); IPR001680 (PROSITE_PROFILES); IPR011048 (SUPERFAMILY); IPR017986 (SUPERFAMILY)
CGI_10025662	l(2)37Cc [Tribolium castaneum]	204	0.8215	C:integral component of membrane		IPR000163 (PANTHER); PTHR23222:SF1 (PANTHER)
CGI_10016184	Importin subunit alpha-2	1089	0.7			no IPS match
CGI_10020916	mitochondrial import inner membrane translocase subunit Tim23 isoform X1	720	0.549	C:integral component of membrane		IPR003397 (PFAM); PTHR15371:SF0 (PANTHER); PTHR15371 (PANTHER)
CGI_10015152	transitional endoplasmic reticulum ATPase	2400	0.9605	F:ATPase activity; P:chordate embryonic development; C:FACT complex; C:site of double-strand break; C:myelin sheath; P:positive regulation of oxidative phosphorylation; P:positive regulation of ATP biosynthetic process; C:VCP-NPL4-UFD1 AAA ATPase complex; P:positive regulation of Lys63-specific deubiquitinase activity; F:lipid binding; P:double-strand break repair; F:ATP binding; P:NADH metabolic…	EC:3.6.1.3	IPR003338 (SMART); IPR004201 (SMART); IPR003593 (SMART); IPR004201 (PFAM); IPR003959 (PFAM); IPR005938 (TIGRFAM); G3DSA:1.10.8.60 (GENE3D); G3DSA:2.40.40.20 (GENE3D); IPR015415 (PFAM); IPR027417 (G3DSA:3.40.50.GENE3D); IPR003338 (PFAM); IPR029067 (G3DSA:3.10.330.GENE3D); IPR027417 (G3DSA:3.40.50.GENE3D); PTHR23077 (PANTHER); PTHR23077:SF69 (PANTHER); IPR027417 (SUPERFAMILY); IPR029067 (SUPERFAMIL…
CGI_10028745	dual specificity mitogen-activated kinase kinase 6 isoform X1 [Monomorium pharaonis]	1107	0.814	F:ATP binding; F:protein kinase activity; P:protein phosphorylation		IPR000719 (SMART); G3DSA:3.30.200.20 (GENE3D); IPR000719 (PFAM); G3DSA:1.10.510.10 (GENE3D); PTHR24361:SF40 (PANTHER); PTHR24361 (PANTHER); IPR000719 (PROSITE_PROFILES); IPR011009 (SUPERFAMILY)
CGI_10007337	RRP12 isoform X1	3762	0.6785	C:nucleolus; F:poly(A) RNA binding
CGI_10002959	hypothetical protein CGI_10002959	600	0.904
CGI_10002461	zinc finger MYM-type 3-like	180	0.7633	F:DNA binding; P:DNA integration; P:DNA recombination
CGI_10001187	poly [ADP-ribose] polymerase 15-like [Crassostrea gigas]	1248	0.6305	P:metabolic process; F:NAD+ ADP-ribosyltransferase activity	EC:2.4.2.30	IPR012317 (PFAM); IPR012317 (G3DSA:3.90.228.GENE3D); PTHR14453:SF50 (PANTHER); PTHR14453 (PANTHER); IPR012317 (PROSITE_PROFILES); SSF56399 (SUPERFAMILY)
CGI_10026432	ependymin-related 1-like	711	0.5017	P:cell-matrix adhesion; F:calcium ion binding; C:extracellular region		IPR001299 (PFAM); PTHR10697 (PANTHER); PTHR10697:SF1 (PANTHER)
CGI_10001813	aspartyl asparaginyl beta-hydroxylase-like	1734	0.698	P:negative regulation of cell proliferation; P:positive regulation of calcium ion transport; P:palate development; C:endoplasmic reticulum part; P:peptidyl-aspartic acid hydroxylation; P:pattern specification process; P:response to chemical; P:single-organism cellular process; P:positive regulation of proteolysis; P:regulation of calcium ion transmembrane transporter activity; P:face morphogenesi…		IPR019734 (SMART); IPR011990 (G3DSA:1.25.40.GENE3D); IPR007803 (PFAM); IPR019734 (PFAM); PF13432 (PFAM); IPR027443 (G3DSA:2.60.120.GENE3D); PTHR12366 (PANTHER); PTHR12366:SF22 (PANTHER); IPR019734 (PROSITE_PROFILES); IPR013026 (PROSITE_PROFILES); IPR011990 (SUPERFAMILY); SSF51197 (SUPERFAMILY)
CGI_10022306	small nuclear ribonucleo Sm D2	360	0.9685	C:catalytic step 2 spliceosome; C:precatalytic spliceosome; C:U4/U6 x U5 tri-snRNP complex; C:U5 snRNP; C:viral nucleocapsid; C:U2 snRNP; C:U1 snRNP; P:spliceosomal snRNP assembly
CGI_10005265	hypothetical protein CGI_10005265	156	1
CGI_10020259	NEDD8-conjugating enzyme UBC12-like	585	0.566	P:cellular macromolecule metabolic process; F:binding; P:primary metabolic process		SM00212 (SMART); IPR000608 (PFAM); IPR016135 (G3DSA:3.10.110.GENE3D); PTHR24067:SF140 (PANTHER); PTHR24067 (PANTHER); IPR000608 (PROSITE_PROFILES); IPR016135 (SUPERFAMILY)
CGI_10024214	LETM1 domain-containing 1	891	0.644	C:integral component of membrane
CGI_10020601	hypothetical protein CGI_10020601	756	1			no IPS match
CGI_10006869	hypothetical protein CGI_10006869	1092	0.5905	C:integral component of membrane
CGI_10004828	von Willebrand factor D and EGF domain-containing -like	1299	0.646			IPR001304 (PFAM); IPR016186 (G3DSA:3.10.100.GENE3D); IPR001304 (PROSITE_PROFILES); IPR016187 (SUPERFAMILY)
CGI_10010969	hypothetical protein CGI_10010969	3651	0.681	F:nucleic acid binding; F:GTP binding; F:metal ion binding		IPR003961 (SMART); IPR027417 (G3DSA:3.40.50.GENE3D); IPR013783 (G3DSA:2.60.40.GENE3D); PTHR18884:SF65 (PANTHER); IPR016491 (PANTHER); IPR003961 (PROSITE_PROFILES); IPR003961 (SUPERFAMILY); IPR027417 (SUPERFAMILY)
CGI_10024702	WD repeat-containing 92	1068	0.892	F:ubiquitin binding
CGI_10023094	hypothetical protein CGI_10023094	900	0.96	C:integral component of membrane
CGI_10014578	F-box only 4	1047	0.5795	F:GTP binding; F:ubiquitin-protein transferase activity; F:protein binding; C:ubiquitin ligase complex; P:homeostatic process; P:positive regulation of protein ubiquitination; P:cellular protein metabolic process; P:cellular response to stimulus; P:single-organism cellular process; P:negative regulation of cellular process
CGI_10008895	general vesicular transport factor p115-like	2832	0.758	P:ER to Golgi vesicle-mediated transport; P:transcytosis; C:ER to Golgi transport vesicle membrane; P:Golgi vesicle docking; F:protein transporter activity; C:Golgi membrane; C:endoplasmic reticulum; P:intracellular protein transport; C:Golgi stack; P:vesicle fusion with Golgi apparatus
CGI_10020699	MAK16 homolog	1011	0.8525
CGI_10006915	serine threonine- kinase pakD-like [Crassostrea gigas]	1044	1
CGI_10006540	[Nematostella vectensis]	684	0.6565	C:membrane; P:apoptotic signaling pathway; F:protein dimerization activity; P:regulation of apoptotic process		IPR026298 (PRINTS); SM00337 (SMART); G3DSA:1.10.437.10 (GENE3D); IPR026298 (PFAM); IPR026298 (PANTHER); PTHR11256:SF45 (PANTHER); IPR002475 (PROSITE_PROFILES); SSF56854 (SUPERFAMILY)
CGI_10006964	Coatomer subunit beta partial	1542	0.8595	C:membrane coat; P:vesicle-mediated transport; F:structural molecule activity; P:intracellular protein transport		IPR006692 (PFAM); PTHR19876 (PANTHER)
CGI_10008214	B(0,+)-type amino acid transporter 1	540	0.8864	F:metal ion binding; P:proteolysis; P:apoptotic process; F:cysteine-type endopeptidase activity	EC:3.4.22	no IPS match
CGI_10009644	surfeit locus 4-like	813	0.8915	C:integral component of membrane
CGI_10003633	calnexin isoform X2 [Papio anubis]	1890	0.806	C:endoplasmic reticulum membrane; C:myelin sheath; C:extracellular exosome; P:synaptic vesicle endocytosis; F:calcium ion binding; C:integral component of membrane; C:cytosol; C:ER-mitochondrion membrane contact site; F:unfolded protein binding; P:protein folding; F:poly(A) RNA binding
CGI_10010757	Minor histocompatibility antigen H13	978	0.862	F:aspartic-type endopeptidase activity; P:proteolysis; C:integral component of membrane; P:regulation of neuron apoptotic process	EC:3.4.23	IPR006639 (SMART); IPR007369 (PFAM); PTHR12174:SF23 (PANTHER); IPR007369 (PANTHER)
CGI_10019410	UDP-glucose:glyco glucosyltransferase 1 isoform X2	4587	0.6905	P:UDP-glucosylation; P:protein glycosylation; F:UDP-glucose:glycoprotein glucosyltransferase activity	EC:2.4.1
CGI_10002628	Small nuclear ribonucleo polypeptide G [Homo sapiens]	234	0.916	P:nuclear import; P:termination of RNA polymerase II transcription; C:small nucleolar ribonucleoprotein complex; C:nucleoplasm; C:U12-type spliceosomal complex; C:catalytic step 2 spliceosome; F:U1 snRNP binding; C:methylosome; C:precatalytic spliceosome; C:spliceosomal tri-snRNP complex; C:cytosol; C:U5 snRNP; P:histone mRNA metabolic process; C:U7 snRNP; C:U2 snRNP; C:U1 snRNP; P:spliceosomal c…
CGI_10023488	WD repeat-containing 36	2715	0.738	C:small-subunit processome; P:rRNA processing		IPR001680 (SMART); IPR015943 (G3DSA:2.130.10.GENE3D); IPR015943 (G3DSA:2.130.10.GENE3D); IPR007319 (PFAM); IPR001680 (PFAM); PTHR22840 (PANTHER); IPR001680 (PROSITE_PROFILES); IPR017986 (PROSITE_PROFILES); IPR017986 (SUPERFAMILY); IPR011047 (SUPERFAMILY)
CGI_10013254	Coatomer subunit gamma-2	2622	0.8925	P:vesicle-mediated transport; F:structural molecule activity; P:intracellular protein transport; C:COPI vesicle coat		IPR017106 (PIRSF); IPR002553 (PFAM); IPR013040 (G3DSA:2.60.40.GENE3D); IPR011989 (G3DSA:1.25.10.GENE3D); IPR032154 (PFAM); IPR013040 (PFAM); IPR015873 (G3DSA:3.30.310.GENE3D); IPR017106 (PANTHER); IPR009028 (SUPERFAMILY); IPR016024 (SUPERFAMILY); IPR013041 (SUPERFAMILY)
CGI_10027954	pseudouridine-5 -phosphatase-like [Biomphalaria glabrata]	672	0.7375	P:metabolic process; F:hydrolase activity		IPR023214 (PFAM); IPR023214 (G3DSA:3.40.50.GENE3D); IPR006439 (TIGRFAM); PTHR18901:SF38 (PANTHER); PTHR18901 (PANTHER); IPR023214 (SUPERFAMILY)
CGI_10022530	importin-7-like isoform X4	3552	0.8525	P:intracellular protein transport; F:Ran GTPase binding; C:intracellular
CGI_10012642	Serine threonine- kinase TBK1	369	0.8515	F:ATP binding; F:protein kinase activity; P:protein phosphorylation
CGI_10002194	[Laccaria bicolor S238N-H82]	747	0.6465	C:integral component of membrane		no IPS match
CGI_10010381	probable serine threonine- kinase pats1	2499	0.505	P:signal transduction		IPR002110 (SMART); PF13857 (PFAM); IPR032171 (PFAM); IPR020683 (G3DSA:1.25.40.GENE3D); IPR011029 (G3DSA:1.10.533.GENE3D); PTHR24188 (PANTHER); IPR020683 (PROSITE_PROFILES); IPR000488 (PROSITE_PROFILES); IPR002110 (PROSITE_PROFILES); IPR011029 (SUPERFAMILY); IPR020683 (SUPERFAMILY)
CGI_10023950	galectin-5- partial	927	0.636	F:carbohydrate binding		IPR001079 (SMART); IPR001079 (SMART); IPR013320 (G3DSA:2.60.120.GENE3D); IPR001079 (PFAM); IPR013320 (G3DSA:2.60.120.GENE3D); PTHR11346 (PANTHER); IPR001079 (PROSITE_PROFILES); IPR013320 (SUPERFAMILY); IPR013320 (SUPERFAMILY)
CGI_10010522	Transcription factor IIIA	1272	0.5915	F:DNA binding; F:metal ion binding		IPR015880 (SMART); IPR013087 (G3DSA:3.30.160.GENE3D); IPR013087 (G3DSA:3.30.160.GENE3D); IPR013087 (G3DSA:3.30.160.GENE3D); IPR013087 (G3DSA:3.30.160.GENE3D); IPR013087 (G3DSA:3.30.160.GENE3D); PTHR24375 (PANTHER); PTHR24375:SF197 (PANTHER); IPR007087 (PROSITE_PROFILES); SSF57667 (SUPERFAMILY); SSF57667 (SUPERFAMILY); SSF57667 (SUPERFAMILY); SSF57667 (SUPERFAMILY)
CGI_10026576	nuclear pore complex Nup205	6096	0.6645	P:nuclear pore organization; C:nuclear pore; P:cellular protein complex assembly		IPR021827 (PFAM); PTHR31344 (PANTHER); PTHR31344:SF0 (PANTHER)
CGI_10020938	dual specificity phosphatase 1	1122	0.6435	P:inactivation of MAPK activity; F:protein tyrosine phosphatase activity; P:peptidyl-tyrosine dephosphorylation; F:MAP kinase tyrosine/serine/threonine phosphatase activity	EC:3.1.3.48; EC:3.1.3	IPR020417 (PRINTS); IPR008343 (PRINTS); IPR020422 (SMART); IPR003595 (SMART); IPR001763 (G3DSA:3.40.250.GENE3D); IPR029021 (G3DSA:3.90.190.GENE3D); IPR001763 (PFAM); IPR000340 (PFAM); IPR024950 (PANTHER); PTHR10159:SF284 (PANTHER); IPR020422 (PROSITE_PROFILES); IPR001763 (PROSITE_PROFILES); IPR000387 (PROSITE_PROFILES); IPR029021 (SUPERFAMILY); IPR001763 (SUPERFAMILY)
CGI_10008403	[Nematostella vectensis]	1347	0.827	F:GTP binding; C:integral component of membrane
CGI_10012590	Integral membrane partial	1278	0.687	P:G-protein coupled receptor signaling pathway; C:integral component of membrane; P:response to pheromone		IPR019336 (PFAM); PTHR23252:SF29 (PANTHER); PTHR23252 (PANTHER)
CGI_10010399	dnaJ homolog subfamily A member 2	513	0.592	F:heat shock protein binding; C:extracellular exosome; F:metal ion binding; F:chaperone binding; C:cytosol; F:unfolded protein binding; P:protein refolding
CGI_10027442	helicase with zinc finger domain 2-like isoform X1 [Crassostrea gigas]	6852	0.5965	F:ligand-dependent nuclear receptor transcription coactivator activity; P:regulation of nucleic acid-templated transcription		SM00955 (SMART); PF00773 (PFAM); PTHR23355 (PANTHER); IPR001849 (PROSITE_PROFILES); IPR012340 (SUPERFAMILY); IPR012340 (SUPERFAMILY)
CGI_10023474	tripartite motif-containing 2-like	1005	0.6715	F:zinc ion binding; P:metabolic process; C:intracellular; F:ligase activity		IPR000315 (SMART); IPR000315 (G3DSA:4.10.45.GENE3D); IPR000315 (PFAM); PTHR24103:SF330 (PANTHER); PTHR24103 (PANTHER); IPR000315 (PROSITE_PROFILES); SSF57845 (SUPERFAMILY)
CGI_10018787	PREDICTED: uncharacterized protein LOC105344740 isoform X2 [Crassostrea gigas]	957	0.8367	P:immune response; C:integral component of membrane; F:tumor necrosis factor receptor binding
CGI_10015230	H ACA ribonucleo complex subunit 4	1497	0.8855	C:box H/ACA snoRNP complex; P:box H/ACA snoRNA 3'-end processing; P:rRNA pseudouridine synthesis; F:RNA binding; P:snRNA pseudouridine synthesis; C:viral nucleocapsid; F:pseudouridine synthase activity; P:mRNA pseudouridine synthesis; P:definitive hemopoiesis	EC:5.4.99.12	IPR012960 (SMART); IPR002478 (SMART); IPR002501 (PFAM); IPR032819 (PFAM); IPR002478 (PFAM); IPR012960 (PFAM); IPR004802 (TIGRFAM); IPR015947 (G3DSA:2.30.130.GENE3D); IPR004521 (TIGRFAM); IPR004802 (PANTHER); IPR002478 (PROSITE_PROFILES); IPR015947 (SUPERFAMILY); IPR020103 (SUPERFAMILY)
CGI_10010841	Ubiquitin-like modifier-activating enzyme 1	1074	0.832	F:ATP binding; P:cellular protein modification process; F:small protein activating enzyme activity		IPR018965 (SMART); IPR018965 (PFAM); IPR000594 (PFAM); IPR019572 (PFAM); IPR016040 (G3DSA:3.40.50.GENE3D); IPR019572 (G3DSA:1.10.3240.GENE3D); PTHR10953 (PANTHER); PTHR10953:SF144 (PANTHER); IPR000594 (SUPERFAMILY)
CGI_10009829	hypothetical protein CGI_10009829	441	0.7925
CGI_10007169	neuroglian-like isoform X1 [Crassostrea gigas]	981	0.73	C:integral component of membrane		IPR003598 (SMART); IPR013783 (G3DSA:2.60.40.GENE3D); IPR013783 (G3DSA:2.60.40.GENE3D); PF13927 (PFAM); PTHR10489 (PANTHER); IPR007110 (PROSITE_PROFILES); IPR007110 (SUPERFAMILY); IPR007110 (SUPERFAMILY)
CGI_10027659	ATP-binding cassette sub-family A member	774	0.6045	F:nucleotide binding; F:ATPase activity; F:ATP binding; P:metabolic process; C:membrane; C:integral component of membrane; P:transport; F:transporter activity
CGI_10013331	Ankyrin repeat domain-containing 50	705	0.6675
CGI_10020470	cholecystokinin receptor type A-like	732	0.5305	F:G-protein coupled receptor activity; P:G-protein coupled receptor signaling pathway; C:integral component of membrane
CGI_10010192	riboflavin biosynthesis chloroplastic-like [Aplysia californica]	1173	0.732	P:metabolic process; F:hydrolase activity
CGI_10010963	cell wall DAN4-like isoform X1	1986	0.746
CGI_10007530	DBH-like monooxygenase 1 [Crassostrea gigas]	474	0.5275	F:oxidoreductase activity, acting on paired donors, with incorporation or reduction of molecular oxygen, reduced ascorbate as one donor, and incorporation of one atom of oxygen; F:copper ion binding; F:catalytic activity; C:membrane; C:integral component of membrane; P:oxidation-reduction process; F:monooxygenase activity		no IPS match
CGI_10027443	helicase with zinc finger domain 2-like isoform X1 [Crassostrea gigas]	870	0.976			no IPS match
CGI_10009556	hypothetical protein CGI_10009556	603	0.99
CGI_10021906	Tripartite motif-containing 2	1107	0.5095	F:zinc ion binding; C:intracellular		IPR011042 (G3DSA:2.120.10.GENE3D); IPR000315 (PROSITE_PROFILES); SSF101898 (SUPERFAMILY)
CGI_10028300	mitochondrial import inner membrane translocase subunit TIM14	189	0.9335	C:integral component of membrane		IPR001623 (SMART); IPR001623 (G3DSA:1.10.287.GENE3D); PTHR12763 (PANTHER); IPR001623 (PROSITE_PROFILES); IPR001623 (SUPERFAMILY)
CGI_10004940	Acetoacetyl- synthetase	2154	0.8085	F:nucleotide binding; C:cytoplasm; F:acetoacetate-CoA ligase activity; P:lipid metabolic process	EC:6.2.1.16	IPR032387 (PFAM); IPR005914 (TIGRFAM); G3DSA:3.40.50.980 (GENE3D); IPR000873 (PFAM); G3DSA:3.40.50.980 (GENE3D); G3DSA:3.30.300.30 (GENE3D); PTHR24095:SF183 (PANTHER); PTHR24095 (PANTHER); PS51257 (PROSITE_PROFILES); SSF56801 (SUPERFAMILY)
CGI_10000700	Pregnancy zone	150	0.9	C:extracellular space; F:endopeptidase inhibitor activity; P:negative regulation of endopeptidase activity; C:extracellular region		no IPS match
CGI_10028440	sex comb on midleg 2 isoform X1	1725	0.717	C:nucleus; P:regulation of transcription, DNA-templated		IPR004092 (SMART); IPR001660 (SMART); IPR013761 (G3DSA:1.10.150.GENE3D); IPR021987 (PFAM); IPR004092 (PFAM); IPR001660 (PFAM); G3DSA:2.30.30.160 (GENE3D); PTHR12247 (PANTHER); PTHR12247:SF76 (PANTHER); IPR004092 (PROSITE_PROFILES); IPR001660 (PROSITE_PROFILES); IPR013761 (SUPERFAMILY); SSF63748 (SUPERFAMILY); SSF63748 (SUPERFAMILY)
CGI_10027821	selenocysteine lyase isoform X1	2004	0.754	P:metabolic process; C:integral component of membrane; F:lyase activity		IPR000192 (PFAM); IPR015421 (G3DSA:3.40.640.GENE3D); PTHR11601 (PANTHER); PTHR11601:SF20 (PANTHER); SSF81321 (SUPERFAMILY); IPR015424 (SUPERFAMILY)
CGI_10015076	transmembrane emp24 domain-containing 10	558	0.887	C:integral component of membrane; P:transport		IPR009038 (SMART); IPR009038 (PFAM); IPR015720 (PANTHER); PTHR22811:SF58 (PANTHER); IPR009038 (PROSITE_PROFILES)
CGI_10008693	small subunit processome component 20 homolog	6057	0.634	F:sodium channel activity; C:integral component of membrane; P:sodium ion transmembrane transport
CGI_10023993	Eukaryotic peptide chain release factor subunit 1	1146	0.793	P:translational termination; C:cytoplasm; F:translation release factor activity, codon specific
CGI_10014308	serine threonine- kinase HT1-like [Nicotiana tabacum]	2355	0.5515	F:ATP binding; F:protein kinase activity; P:protein phosphorylation
CGI_10024590	mantle 9 [Salpingoeca rosetta]	2358	0.515	F:serine-type endopeptidase inhibitor activity; F:metal ion binding; F:oxidoreductase activity; F:N-acylneuraminate cytidylyltransferase activity; P:metabolic process; C:membrane; P:proteolysis; C:integral component of membrane; C:cytosol; P:negative regulation of endopeptidase activity; P:oxidation-reduction process; F:peptidase activity		PS51257 (PROSITE_PROFILES)
CGI_10023158	TNF receptor-associated factor 3 isoform X3	1497	0.613	F:ubiquitin-protein transferase activity; F:zinc ion binding; P:protein ubiquitination
CGI_10019462	ETS-related transcription factor Elf-3	1374	0.5685	C:nucleus; F:transcription factor activity, sequence-specific DNA binding; P:regulation of transcription, DNA-templated; F:sequence-specific DNA binding; P:cellular process; P:single-organism developmental process		IPR000418 (PRINTS); IPR003118 (SMART); IPR000418 (SMART); IPR000418 (PFAM); IPR013761 (G3DSA:1.10.150.GENE3D); IPR011991 (G3DSA:1.10.10.GENE3D); IPR003118 (PFAM); PTHR11849:SF190 (PANTHER); PTHR11849 (PANTHER); IPR003118 (PROSITE_PROFILES); IPR000418 (PROSITE_PROFILES); IPR013761 (SUPERFAMILY); IPR011991 (SUPERFAMILY)
CGI_10012593	hypothetical protein CGI_10012593	480	0.7807	C:integral component of membrane		no IPS match
CGI_10023524	Coatomer subunit delta	2463	0.8305	P:cerebellar Purkinje cell layer maturation; P:retrograde vesicle-mediated transport, Golgi to ER; P:pigmentation; P:protein transport; C:endoplasmic reticulum; P:adult locomotory behavior; C:COPI vesicle coat; F:poly(A) RNA binding
CGI_10006939	26S protease regulatory subunit 10B	1185	0.962	F:ATP binding; C:cytoplasm; P:protein catabolic process; P:proteolysis; F:peptidase activity
CGI_10007405	Poly [ADP-ribose] polymerase partial	735	0.62	P:metabolic process; F:NAD+ ADP-ribosyltransferase activity	EC:2.4.2.30	IPR012317 (PFAM); IPR012317 (G3DSA:3.90.228.GENE3D); PTHR14453 (PANTHER); IPR012317 (PROSITE_PROFILES); SSF56399 (SUPERFAMILY)
CGI_10007617	serine threonine- phosphatase 6 regulatory ankyrin repeat subunit B-like	885	0.572	F:ubiquitin-protein transferase activity; P:metabolic process; F:ligase activity; P:protein ubiquitination		IPR002110 (PRINTS); IPR002110 (SMART); IPR020683 (PFAM); IPR002110 (PFAM); IPR020683 (G3DSA:1.25.40.GENE3D); IPR020683 (G3DSA:1.25.40.GENE3D); PTHR24198 (PANTHER); IPR002110 (PROSITE_PROFILES); IPR020683 (PROSITE_PROFILES); IPR020683 (SUPERFAMILY)
CGI_10015363	hypothetical protein CGI_10015363	432	0.99			no IPS match
CGI_10018988	kielin chordin	639	0.6762	F:peptidase inhibitor activity; P:negative regulation of peptidase activity		no IPS match
CGI_10024492	Poly [ADP-ribose] polymerase 14	5961	0.6535	F:nucleotide binding; F:nucleic acid binding; P:metabolic process; F:NAD+ ADP-ribosyltransferase activity	EC:2.4.2.30	IPR000504 (SMART); IPR002589 (SMART); IPR002589 (PFAM); IPR012317 (PFAM); IPR012317 (G3DSA:3.90.228.GENE3D); IPR012677 (G3DSA:3.30.70.GENE3D); IPR012677 (G3DSA:3.30.70.GENE3D); G3DSA:3.40.220.10 (GENE3D); IPR012677 (G3DSA:3.30.70.GENE3D); PTHR14453 (PANTHER); IPR012317 (PROSITE_PROFILES); IPR000504 (PROSITE_PROFILES); IPR002589 (PROSITE_PROFILES); IPR004170 (PROSITE_PROFILES); SSF117839 (SUPERFAM…
CGI_10026191	basic leucine zipper transcriptional factor ATF-like isoform X2 [Crassostrea gigas]	573	0.7575	F:transcription factor activity, sequence-specific DNA binding; P:regulation of transcription, DNA-templated; F:sequence-specific DNA binding		IPR004827 (SMART); G3DSA:1.20.5.170 (GENE3D); IPR004827 (PFAM); IPR004827 (PROSITE_PROFILES); SSF57959 (SUPERFAMILY)
CGI_10019878	mannosyl-oligosaccharide glucosidase-like	2340	0.743	C:endoplasmic reticulum membrane; C:integral component of membrane; P:protein N-linked glycosylation; F:mannosyl-oligosaccharide glucosidase activity; P:oligosaccharide metabolic process	EC:3.2.1.106	IPR031631 (PFAM); IPR031335 (PFAM); PTHR10412:SF11 (PANTHER); IPR004888 (PANTHER); IPR008928 (SUPERFAMILY)
CGI_10018145	Tripartite motif-containing 45	1899	0.6185	F:zinc ion binding; C:intracellular		IPR001841 (SMART); IPR011042 (G3DSA:2.120.10.GENE3D); IPR013083 (G3DSA:3.30.40.GENE3D); IPR010620 (PFAM); IPR018957 (PFAM); PTHR24103 (PANTHER); PTHR24103:SF331 (PANTHER); IPR000315 (PROSITE_PROFILES); IPR001841 (PROSITE_PROFILES); SSF57850 (SUPERFAMILY); SSF101898 (SUPERFAMILY)
CGI_10000070	pseudouridine-5 -phosphatase	570	0.7695	P:metabolic process; F:hydrolase activity		IPR023214 (G3DSA:3.40.50.GENE3D); IPR006439 (TIGRFAM); IPR023214 (PFAM); PTHR18901:SF38 (PANTHER); PTHR18901 (PANTHER); IPR023214 (SUPERFAMILY)
CGI_10028749	chondroitin sulfate N-acetylgalactosaminyltransferase 1-like [Crassostrea gigas]	1458	0.728	C:membrane; F:transferase activity		IPR008428 (PFAM); IPR029044 (G3DSA:3.90.550.GENE3D); PTHR12369:SF25 (PANTHER); PTHR12369 (PANTHER); IPR029044 (SUPERFAMILY)
CGI_10023410	ATP-dependent RNA helicase DDX18	1737	0.915	F:ATP binding; C:membrane; P:metabolic process; P:myeloid cell differentiation; F:helicase activity; C:nucleolus; F:poly(A) RNA binding
CGI_10003372	perilipin-2 isoform X3 [Parus major]	1422	0.616
CGI_10012652	26S proteasome non-ATPase regulatory subunit 10-like	792	0.5615	P:biological_process; F:molecular_function; C:intracellular
CGI_10026003	manganese-transporting ATPase 13A1-like	3519	0.7975	C:integral component of plasma membrane; F:ATP binding; P:cation transport; F:cation-transporting ATPase activity; F:metal ion binding; C:intracellular membrane-bounded organelle; P:metabolic process; P:cellular calcium ion homeostasis
CGI_10002774	Tricarboxylate transport mitochondrial	840	0.824	P:transmembrane transport; F:structural constituent of ribosome; C:integral component of membrane; P:translation
CGI_10008992	hypothetical protein CGI_10008992	1314	0.8938	F:chitin binding; P:chitin metabolic process; C:integral component of membrane; C:extracellular region
CGI_10010446	AF-9-like isoform X1 [Crassostrea gigas]	2427	0.822	P:negative regulation of canonical Wnt signaling pathway; C:extracellular exosome; F:protein binding; C:transcription elongation factor complex; P:transcription, DNA-templated; P:positive regulation of Wnt signaling pathway, planar cell polarity pathway; P:anterior/posterior pattern specification; P:regulation of transcription, DNA-templated; P:segment specification		IPR005033 (PFAM); IPR005033 (PANTHER); PTHR23195:SF27 (PANTHER); IPR005033 (PROSITE_PROFILES)
CGI_10023361	ubiquitin carboxyl-terminal hydrolase 15 isoform X2	2772	0.743	F:identical protein binding; P:monoubiquitinated protein deubiquitination; F:transforming growth factor beta receptor binding; F:cysteine-type endopeptidase activity; P:transforming growth factor beta receptor signaling pathway; F:ubiquitinated histone binding; P:pathway-restricted SMAD protein phosphorylation; P:ubiquitin-dependent protein catabolic process; F:thiol-dependent ubiquitin-specific …	EC:3.4.22	IPR006615 (SMART); IPR006615 (G3DSA:3.30.2230.GENE3D); IPR029346 (PFAM); IPR006615 (PFAM); IPR001394 (PFAM); IPR028135 (PFAM); IPR028134 (PTHR24006:PANTHER); PTHR24006 (PANTHER); IPR006615 (PROSITE_PROFILES); IPR028889 (PROSITE_PROFILES); IPR006615 (SUPERFAMILY); SSF54001 (SUPERFAMILY)
CGI_10000837	sacsin-like [Acropora digitifera]	327	0.856	F:low-density lipoprotein particle receptor binding		IPR003594 (G3DSA:3.30.565.GENE3D); PTHR15600 (PANTHER); PTHR15600:SF28 (PANTHER); IPR003594 (SUPERFAMILY)
CGI_10024151	ubiquitin carboxyl-terminal hydrolase 14-like	1473	0.7995	P:protein deubiquitination; P:regulation of response to stimulus; F:proteasome binding; P:regulation of proteasomal protein catabolic process; C:cytoplasm; C:membrane; C:vesicle; P:negative regulation of proteolysis; F:thiol-dependent ubiquitinyl hydrolase activity; P:ubiquitin-dependent protein catabolic process	EC:3.4.19.12
CGI_10018826	U3 small nucleolar ribonucleo IMP4	1023	0.875	C:small-subunit processome; F:snoRNA binding; C:Mpp10 complex; C:viral nucleocapsid; F:rRNA primary transcript binding; P:rRNA processing		IPR007109 (SMART); IPR007109 (PFAM); IPR007109 (G3DSA:3.40.50.GENE3D); PTHR22734:SF2 (PANTHER); PTHR22734 (PANTHER); IPR007109 (PROSITE_PROFILES); IPR004154 (SUPERFAMILY)
CGI_10012340	4-hydroxyphenylpyruvate dioxygenase	1221	0.577	F:dioxygenase activity; F:oxidoreductase activity, acting on single donors with incorporation of molecular oxygen; P:aromatic amino acid family metabolic process; F:metal ion binding; F:4-hydroxyphenylpyruvate dioxygenase activity; P:oxidation-reduction process		IPR029068 (G3DSA:3.10.180.GENE3D); IPR029068 (G3DSA:3.10.180.GENE3D); IPR005956 (PANTHER); PTHR11959:SF10 (PANTHER); IPR029068 (SUPERFAMILY)
CGI_10000308	hypothetical protein CGI_10000308	399	1			no IPS match
CGI_10028285	kielin chordin	696	0.5625	F:peptidase inhibitor activity; P:negative regulation of peptidase activity		IPR006150 (SMART); IPR028150 (PFAM); IPR008037 (PROSITE_PROFILES); IPR008037 (SUPERFAMILY); SSF57603 (SUPERFAMILY)
CGI_10009122	bystin	1320	0.82	P:cell proliferation; P:maturation of SSU-rRNA from tricistronic rRNA transcript (SSU-rRNA, 5.8S rRNA, LSU-rRNA); C:apical part of cell; C:cytoplasm; C:membrane; C:nucleolus; F:poly(A) RNA binding		IPR007955 (PFAM); IPR007955 (PANTHER); PTHR12821:SF0 (PANTHER)
CGI_10006439	stimulator of interferon genes -like isoform X3 [Crassostrea gigas]	2133	0.5495	P:activation of innate immune response; P:signal transduction; P:positive regulation of type I interferon production		IPR000157 (G3DSA:3.40.50.GENE3D); IPR029158 (PFAM); IPR000157 (G3DSA:3.40.50.GENE3D); IPR000157 (SUPERFAMILY); IPR000157 (SUPERFAMILY)
CGI_10015284	hypothetical protein CGI_10015284	507	1
CGI_10013794		3156				no IPS match
CGI_10015934	ADP-ribosylation factor-like	570	0.8355	F:GTP binding; P:small GTPase mediated signal transduction; P:protein transport; C:intracellular		IPR006689 (PRINTS); SM00178 (SMART); SM00177 (SMART); SM00175 (SMART); IPR006689 (PFAM); IPR027417 (G3DSA:3.40.50.GENE3D); IPR005225 (TIGRFAM); PTHR11711 (PANTHER); IPR024156 (PROSITE_PROFILES); IPR027417 (SUPERFAMILY)
CGI_10014431	methionine synthase reductase [Peromyscus maniculatus bairdii]	1314	0.6755	P:methionine biosynthetic process; P:biological regulation; C:intracellular organelle; P:DNA methylation; P:S-adenosylmethionine cycle; F:flavin adenine dinucleotide binding; P:folic acid metabolic process; P:oxidation-reduction process; P:homocysteine metabolic process; F:[methionine synthase] reductase activity	EC:1.16.1.8
CGI_10024309	heat shock 75 mitochondrial-like	1917	0.8145	F:ATP binding; F:unfolded protein binding; P:protein folding; P:response to stress		IPR020575 (PRINTS); IPR003594 (G3DSA:3.30.565.GENE3D); IPR001404 (PFAM); IPR001404 (PIRSF); PF13589 (PFAM); IPR001404 (PANTHER); PTHR11528:SF44 (PANTHER); IPR001404 (HAMAP); IPR020568 (SUPERFAMILY); SSF110942 (SUPERFAMILY); IPR003594 (SUPERFAMILY)
CGI_10021070	hypothetical protein CGI_10021070	1599	0.9225			IPR003599 (SMART); IPR013783 (G3DSA:2.60.40.GENE3D); IPR013151 (PFAM); IPR013098 (PFAM); IPR013783 (G3DSA:2.60.40.GENE3D); IPR007110 (PROSITE_PROFILES); IPR007110 (SUPERFAMILY); IPR007110 (SUPERFAMILY)
CGI_10010145	ribonuclease Oy-like	381	0.7295	P:RNA phosphodiester bond hydrolysis, endonucleolytic; F:RNA binding; C:integral component of membrane; F:ribonuclease T2 activity	EC:3.1.27.1
CGI_10016953	serine threonine- kinase TBK1-like isoform X2 [Crassostrea gigas]	642	0.96	C:nucleus; F:metal ion binding; P:phosphorylation; P:intracellular protein transport; F:kinase activity; P:mRNA splicing, via spliceosome		G3DSA:3.30.200.20 (GENE3D)
CGI_10008804	PREDICTED: uncharacterized protein LOC105336910 isoform X1 [Crassostrea gigas]	921	0.99
CGI_10025118	cell wall integrity and stress response component 4-like	1035	0.709	C:integral component of membrane; C:viral capsid		IPR004302 (PFAM); PTHR21113 (PANTHER)
CGI_10010736	Tripartite motif-containing 2	789	0.4885	F:zinc ion binding; C:intracellular
CGI_10018028	hypothetical protein CGI_10018028	402	0.9338	F:chitin binding; P:chitin metabolic process; C:integral component of membrane; C:extracellular region		IPR002557 (SMART); IPR002557 (G3DSA:2.170.140.GENE3D); IPR002557 (PFAM); IPR002557 (PROSITE_PROFILES); IPR002557 (SUPERFAMILY)
CGI_10006301	probable 18S rRNA (guanine-N(7))-methyltransferase	906	0.775	P:metabolic process; F:transferase activity
CGI_10022071	cysteine sulfinic Acid Decarboxylase	1485	0.77	F:pyridoxal phosphate binding; P:carboxylic acid metabolic process; F:carboxy-lyase activity
CGI_10004645	poly [ADP-ribose] polymerase 14-like	576	0.7015	F:organic cyclic compound binding; F:heterocyclic compound binding; P:metabolic process; F:NAD+ ADP-ribosyltransferase activity	EC:2.4.2.30	IPR012317 (G3DSA:3.90.228.GENE3D); IPR012317 (PFAM); PTHR14453 (PANTHER); PTHR14453:SF53 (PANTHER); IPR012317 (PROSITE_PROFILES); SSF56399 (SUPERFAMILY)
CGI_10019865	hypothetical protein CGI_10019865	681	0.99			no IPS match
CGI_10024102	probable phosphite transport system-binding	990	0.6255			PF12974 (PFAM); PTHR35841:SF1 (PANTHER); PTHR35841 (PANTHER); SSF53850 (SUPERFAMILY)
CGI_10014532	interferon-induced 44-like [Crassostrea gigas]	1494	0.902	F:GTP binding
CGI_10028173	78 kDa glucose-regulated	1902	0.756	F:ATP binding; F:oxidoreductase activity
CGI_10016364	Baculoviral IAP repeat-containing 2	774	0.611	P:regulation of response to stimulus; P:positive regulation of cellular process; P:regulation of cellular protein metabolic process; P:regulation of apoptotic process; P:negative regulation of programmed cell death; C:intracellular part; P:single-organism process; P:regulation of necroptotic process; P:cellular process
CGI_10017876	Solute carrier family 23 member 2	1341	0.6655	P:transmembrane transport; C:integral component of membrane; F:transporter activity		IPR006043 (PFAM); PTHR11119:SF3 (PANTHER); IPR006043 (PANTHER)
CGI_10028719	signal transducer and activator of transcription 5B-like	291	0.6985	C:nucleus; F:transcription factor activity, sequence-specific DNA binding; P:positive regulation of myeloid cell differentiation; P:lymphocyte differentiation; P:erythrocyte development; P:positive regulation of transcription from RNA polymerase II promoter; F:signal transducer activity; P:JAK-STAT cascade		IPR000980 (G3DSA:3.30.505.GENE3D); PTHR11801:SF43 (PANTHER); IPR001217 (PANTHER); IPR000980 (SUPERFAMILY)
CGI_10020091	F-box only 40-like	1398	0.5565	F:zinc ion binding; F:ubiquitin protein ligase activity; P:protein ubiquitination
CGI_10014624	methionine--tRNA cytoplasmic isoform X2	2034	0.7335	F:ATP binding; F:methionine-tRNA ligase activity; P:methionyl-tRNA aminoacylation; C:cytosol	EC:6.1.1.10
CGI_10000166	Interleukin-1 receptor-associated kinase 4	1008	0.6175	F:ATP binding; F:protein serine/threonine kinase activity; P:protein phosphorylation	EC:2.7.11	IPR029397 (PFAM); G3DSA:3.30.200.20 (GENE3D); IPR011029 (G3DSA:1.10.533.GENE3D); IPR000719 (PFAM); PTHR24419:SF22 (PANTHER); PTHR24419 (PANTHER); IPR000719 (PROSITE_PROFILES); IPR011009 (SUPERFAMILY); IPR011029 (SUPERFAMILY)
CGI_10014005	Dual specificity phosphatase 4	975	0.636	P:inactivation of MAPK activity; F:protein tyrosine phosphatase activity; P:peptidyl-tyrosine dephosphorylation; F:MAP kinase tyrosine/serine/threonine phosphatase activity	EC:3.1.3.48; EC:3.1.3
CGI_10011562	nuclear pore complex Nup214-like isoform X1 [Lingula anatina]	6024	0.615	P:mRNA export from nucleus; C:nucleus; C:focal adhesion; P:protein import into nucleus; C:intracellular membrane-bounded organelle; P:regulation of cell cycle; P:protein export from nucleus; F:nucleocytoplasmic transporter activity		IPR001680 (SMART); IPR015943 (G3DSA:2.130.10.GENE3D); IPR025574 (PFAM); PTHR23193 (PANTHER); PTHR23193:SF21 (PANTHER); SSF117289 (SUPERFAMILY)
CGI_10025706	methylenetetrahydrofolate reductase-like isoform X1 [Biomphalaria glabrata]	1953	0.811	P:tetrahydrofolate interconversion; P:oxidation-reduction process; F:methylenetetrahydrofolate reductase (NAD(P)H) activity; P:methionine metabolic process	EC:1.5.1.20	IPR004621 (TIGRFAM); IPR003171 (PFAM); IPR029041 (G3DSA:3.20.20.GENE3D); PTHR21091 (PANTHER); PTHR21091:SF31 (PANTHER); IPR029041 (SUPERFAMILY)
CGI_10020409	glutamine--fructose-6-phosphate aminotransferase [isomerizing] 2-like isoform X5	2199	0.8905	P:carbohydrate metabolic process; F:glutamine-fructose-6-phosphate transaminase (isomerizing) activity; P:carbohydrate derivative biosynthetic process; F:carbohydrate binding	EC:2.6.1.16	IPR029055 (G3DSA:3.60.20.GENE3D); G3DSA:3.40.50.10490 (GENE3D); G3DSA:3.40.50.10490 (GENE3D); IPR001347 (PFAM); PF13522 (PFAM); PTHR10937:SF10 (PANTHER); PTHR10937 (PANTHER); IPR017932 (PROSITE_PROFILES); IPR001347 (PROSITE_PROFILES); SSF53697 (SUPERFAMILY); SSF53697 (SUPERFAMILY); IPR029055 (SUPERFAMILY)
CGI_10016370	Pro convertase subtilisin kexin type 4	1704	0.6475	P:proteolysis; F:serine-type endopeptidase activity	EC:3.4.21
CGI_10016060	poly [ADP-ribose] polymerase 14-like	489	0.667	P:metabolic process; F:NAD+ ADP-ribosyltransferase activity	EC:2.4.2.30	IPR012317 (G3DSA:3.90.228.GENE3D); IPR012317 (PFAM); PTHR14453 (PANTHER); IPR012317 (PROSITE_PROFILES); SSF56399 (SUPERFAMILY)
CGI_10009742	E3 ubiquitin- ligase HACE1-like isoform X2 [Biomphalaria glabrata]	1764	0.6345	F:ATP binding; F:protein kinase activity; P:protein phosphorylation
CGI_10014669	hypothetical protein CGI_10014669	420	1			no IPS match
CGI_10010759	GTPase SLIP-GC	12792	0.6465	F:ATP binding		IPR003593 (SMART); IPR027417 (G3DSA:3.40.50.GENE3D); IPR022812 (PFAM); PTHR36681:SF1 (PANTHER); PTHR36681 (PANTHER); IPR027417 (SUPERFAMILY); IPR027417 (SUPERFAMILY)
CGI_10019894	isocitrate dehydrogenase [NAD] subunit mitochondrial-like	1086	0.8675	F:magnesium ion binding; F:isocitrate dehydrogenase (NAD+) activity; F:NAD binding; C:mitochondrion; P:tricarboxylic acid cycle	EC:1.1.1.41
CGI_10016379	hypothetical protein CGI_10016379	1224	1
CGI_10015504	peptidyl-prolyl cis-trans isomerase D	1104	0.7345	C:nucleus; F:heat shock protein binding; F:peptidyl-prolyl cis-trans isomerase activity; P:positive regulation of cellular process; F:progesterone receptor binding; P:cellular component organization; P:regulation of apoptotic process; P:protein peptidyl-prolyl isomerization; P:protein folding	EC:5.2.1.8
CGI_10011426	ATP-binding cassette sub-family E member 1	2256	0.924	F:ATP binding; P:metabolic process; P:organic phosphonate transport; P:organophosphate ester transport; F:organic phosphonate transmembrane-transporting ATPase activity	EC:3.6.3.28
CGI_10014052	RER1 isoform X1 [Sinocyclocheilus grahami]	618	0.806	P:cilium assembly; C:integral component of membrane		IPR004932 (PIRSF); IPR004932 (PFAM); IPR004932 (PANTHER)
CGI_10020050	cartilage matrix -like	4704	0.7725	F:calcium ion binding		PR00010 (PRINTS); IPR002035 (SMART); IPR000742 (SMART); IPR001881 (SMART); IPR002035 (G3DSA:3.40.50.GENE3D); G3DSA:2.10.25.10 (GENE3D); G3DSA:3.90.1200.10 (GENE3D); G3DSA:2.170.300.10 (GENE3D); IPR016477 (PFAM); IPR000742 (PFAM); G3DSA:2.10.25.10 (GENE3D); G3DSA:2.10.25.10 (GENE3D); IPR002035 (PFAM); IPR002035 (G3DSA:3.40.50.GENE3D); IPR002035 (G3DSA:3.40.50.GENE3D); PTHR24033 (PANTHER); IPR00203…
CGI_10017881	Multidrug resistance-associated 4	4044	0.737	F:ATP binding; F:ATPase activity, coupled to transmembrane movement of substances; P:transmembrane transport; F:efflux transmembrane transporter activity; P:metabolic process; P:detoxification; C:integral component of membrane; P:regulation of cilium assembly; C:plasma membrane		IPR003593 (SMART); IPR011527 (PFAM); G3DSA:1.20.1560.10 (GENE3D); IPR027417 (G3DSA:3.40.50.GENE3D); IPR003439 (PFAM); IPR030240 (PTHR24223:PANTHER); PTHR24223 (PANTHER); IPR003439 (PROSITE_PROFILES); IPR011527 (PROSITE_PROFILES); IPR027417 (SUPERFAMILY); IPR011527 (SUPERFAMILY); IPR027417 (SUPERFAMILY); IPR011527 (SUPERFAMILY)
CGI_10018760	acetylcholine receptor subunit alpha-1-B-like isoform X2 [Crassostrea gigas]	1431	0.636	P:ion transmembrane transport; C:integral component of membrane; F:extracellular ligand-gated ion channel activity
CGI_10015028	hypothetical protein CGI_10015028	249	1
CGI_10007057	ubiquitin-like modifier-activating enzyme 1 [Sinocyclocheilus grahami]	2604	0.797	C:nucleus; F:ubiquitin-protein transferase activity; F:ATP binding; P:axonogenesis; P:cellular protein modification process; C:cytosol; F:ubiquitin activating enzyme activity; P:ubiquitin-dependent protein catabolic process		IPR000011 (PRINTS); IPR018965 (SMART); IPR016040 (G3DSA:3.40.50.GENE3D); IPR032418 (PFAM); IPR018965 (PFAM); IPR000594 (PFAM); IPR019572 (PFAM); IPR032420 (PFAM); IPR016040 (G3DSA:3.40.50.GENE3D); IPR018075 (TIGRFAM); PTHR10953 (PANTHER); PTHR10953:SF144 (PANTHER); IPR000594 (SUPERFAMILY); IPR000594 (SUPERFAMILY)
CGI_10003733	midasin isoform X3	4848	0.7795	F:ATPase activity; C:nucleus; F:ATP binding; P:metabolic process; P:ribosomal large subunit assembly	EC:3.6.1.3
CGI_10009177	dolichyl-diphosphooligosaccharide-- glycosyltransferase subunit 2-like	2121	0.7155	C:oligosaccharyltransferase complex; C:integral component of membrane; P:protein N-linked glycosylation; F:transferase activity		IPR008814 (PFAM); IPR008814 (PTHR12640:PANTHER); PTHR12640 (PANTHER)
CGI_10001643	Nucleoporin Nup43	1143	0.6555	C:nuclear pore outer ring
CGI_10004524	5-hydroxytryptamine receptor 1-like [Crassostrea gigas]	1479	0.5465	F:protein tyrosine phosphatase activity; C:integral component of membrane; P:peptidyl-tyrosine dephosphorylation	EC:3.1.3.48
CGI_10007981	hypothetical protein CGI_10007981	294	1			no IPS match
CGI_10014991	acetyl-coenzyme A transporter 1-like	1032	0.7935	C:integral component of membrane; F:acetyl-CoA transporter activity; P:acetyl-CoA transport		G3DSA:1.20.1250.20 (GENE3D); IPR024371 (PFAM); PTHR12778:SF9 (PANTHER); PTHR12778 (PANTHER); IPR020846 (SUPERFAMILY)
CGI_10008981	WD repeat-containing 46	1617	0.7495	C:small-subunit processome; P:maturation of SSU-rRNA from tricistronic rRNA transcript (SSU-rRNA, 5.8S rRNA, LSU-rRNA); C:nucleolus; C:90S preribosome
CGI_10013030	2 ,5 -phosphodiesterase 12	1635	0.6535	C:mitochondrion		IPR005135 (G3DSA:3.60.10.GENE3D); IPR005135 (PFAM); PTHR12121:SF37 (PANTHER); PTHR12121 (PANTHER); IPR005135 (SUPERFAMILY)
CGI_10017528	peptidyl-prolyl cis-trans isomerase FKBP4	1386	0.729	P:developmental process involved in reproduction; F:protein binding; F:organic cyclic compound binding; F:heterocyclic compound binding; P:multicellular organism development; P:protein folding; C:intracellular part; C:membrane-bounded organelle		IPR019734 (SMART); IPR001440 (PFAM); G3DSA:3.10.50.40 (GENE3D); G3DSA:3.10.50.40 (GENE3D); IPR001179 (PFAM); IPR011990 (G3DSA:1.25.40.GENE3D); PTHR10516:SF274 (PANTHER); IPR023566 (PANTHER); IPR001179 (PROSITE_PROFILES); IPR019734 (PROSITE_PROFILES); IPR013026 (PROSITE_PROFILES); IPR011990 (SUPERFAMILY); SSF54534 (SUPERFAMILY); SSF54534 (SUPERFAMILY)
CGI_10024143	RNA exonuclease NEF-sp	1443	0.7245	F:nucleic acid binding; P:nucleic acid phosphodiester bond hydrolysis; F:exonuclease activity
CGI_10005330	hypothetical protein CGI_10005330	1167	0.772
CGI_10000686	hypothetical protein CGI_10000686	279	1			no IPS match
CGI_10010400	dnaJ homolog subfamily A member 2-like	273	0.735	P:biological regulation; P:establishment of protein localization to organelle; P:protein targeting; F:protein binding; P:single-organism cellular localization; F:ion binding; C:cytosol; P:single-organism cellular process; P:protein folding; P:organelle organization; P:response to stress
CGI_10002871	cystatin-A	351	0.638	F:peptidase inhibitor activity; F:endopeptidase inhibitor activity; F:cysteine-type endopeptidase inhibitor activity; C:membrane; C:integral component of membrane; P:negative regulation of endopeptidase activity; C:intracellular; P:negative regulation of peptidase activity		G3DSA:3.10.450.10 (GENE3D); PTHR11414 (PANTHER); SSF54403 (SUPERFAMILY)
CGI_10016770	transmembrane emp24 domain-containing 2-like	483	0.9315	P:multicellular organism growth; P:post-anal tail morphogenesis; P:negative regulation of GTPase activity; P:Golgi organization; C:endoplasmic reticulum; C:Golgi apparatus; C:endoplasmic reticulum-Golgi intermediate compartment; P:neural tube closure; P:positive regulation of gene expression; P:protein targeting to plasma membrane; C:integral component of membrane; P:heart looping; P:somite rostr…
CGI_10026388	delta 4	540	0.5	P:single-organism process
CGI_10015747	FMRFamide receptor-like [Crassostrea gigas]	936	0.558	F:G-protein coupled receptor activity; P:G-protein coupled receptor signaling pathway; C:integral component of membrane		IPR000276 (PRINTS); G3DSA:1.20.1070.10 (GENE3D); IPR000276 (PFAM); PTHR22751 (PANTHER); IPR017452 (PROSITE_PROFILES); SSF81321 (SUPERFAMILY)
CGI_10016865	leucine-rich repeat-containing 58-like	1071	0.729			PR00019 (PRINTS); IPR003591 (SMART); IPR001611 (PFAM); IPR032675 (G3DSA:3.80.10.GENE3D); IPR001611 (PFAM); IPR032675 (G3DSA:3.80.10.GENE3D); PTHR23155 (PANTHER); IPR001611 (PROSITE_PROFILES); IPR032675 (SUPERFAMILY)
CGI_10017081	PREDICTED: uncharacterized protein LOC105342376 [Crassostrea gigas]	942	1			no IPS match
CGI_10027967	phospholipase A-2-activating	2358	0.7075	P:inflammatory response; C:extracellular exosome; P:positive regulation of catalytic activity; F:phospholipase A2 activator activity
CGI_10009289	CAP-Gly domain-containing linker 1-like	1677	0.6456	P:regulation of apoptotic process
CGI_10011338	nuclear pore complex Nup160-like	4110	0.594
CGI_10002916	AT-rich interactive domain-containing 1B-like	459	0.6357
CGI_10004346	T-complex 1 subunit gamma	1743	0.8655	F:ATP binding; C:cytoplasm; F:unfolded protein binding; P:protein folding		IPR017998 (PRINTS); IPR012719 (TIGRFAM); IPR027410 (G3DSA:3.30.260.GENE3D); IPR027413 (G3DSA:1.10.560.GENE3D); IPR002423 (PFAM); IPR027409 (G3DSA:3.50.7.GENE3D); IPR012719 (PTHR11353:PANTHER); PTHR11353 (PANTHER); IPR027409 (SUPERFAMILY); SSF48592 (SUPERFAMILY); SSF54849 (SUPERFAMILY)
CGI_10000293	Coatomer subunit beta partial	558	0.9075	F:protein kinase C binding; P:ER to Golgi vesicle-mediated transport; P:retrograde vesicle-mediated transport, Golgi to ER; F:structural molecule activity; P:intra-Golgi vesicle-mediated transport; P:intracellular protein transport; P:toxin transport; C:COPI vesicle coat		IPR006692 (PFAM); PTHR19876 (PANTHER)
CGI_10006178	Phosphoserine phosphatase	711	0.8035	F:magnesium ion binding; F:phosphoserine phosphatase activity; C:cytoplasm; P:L-serine biosynthetic process; P:dephosphorylation	EC:3.1.3.3
CGI_10026818	transmembrane 8B-like	2520	0.6055	C:integral component of membrane
CGI_10010423	Eukaryotic translation initiation factor 2 subunit 2	1026	0.8165	F:translation initiation factor activity; F:phosphatidylinositol phospholipase C activity; P:phospholipid catabolic process; P:translational initiation; F:signal transducer activity; C:intracellular; P:intracellular signal transduction	EC:3.1.4.11	IPR002735 (SMART); IPR002735 (PFAM); IPR016189 (G3DSA:3.30.30.GENE3D); PTHR23001:SF3 (PANTHER); PTHR23001 (PANTHER); IPR016190 (SUPERFAMILY); IPR016189 (SUPERFAMILY)
CGI_10009762	baculoviral IAP repeat-containing 7-like [Octopus bimaculoides]	681	0.657	F:zinc ion binding
CGI_10024878	complement C1q 4	1503	0.634			IPR001073 (PRINTS); IPR001073 (SMART); IPR008983 (G3DSA:2.60.120.GENE3D); IPR001073 (PFAM); PTHR21530:SF0 (PANTHER); PTHR21530 (PANTHER); IPR001073 (PROSITE_PROFILES); IPR008983 (SUPERFAMILY)
CGI_10027015	nuclear localization 4 homolog	1350	0.775	F:zinc ion binding; C:intracellular part; P:ubiquitin-dependent protein catabolic process
CGI_10027378	collagen alpha-3(VI) chain- partial	684	0.6225	F:binding		IPR002035 (G3DSA:3.40.50.GENE3D); IPR002035 (PFAM); IPR002035 (PROSITE_PROFILES); IPR002035 (SUPERFAMILY)
CGI_10007774	Ubiquitin-like modifier-activating enzyme 1	1776	0.7975	P:cellular protein modification process; P:cellular response to DNA damage stimulus; C:lysosomal membrane; F:poly(A) RNA binding; P:ubiquitin-dependent protein catabolic process; C:heterochromatin; C:nucleus; F:ubiquitin-protein transferase activity; F:ATP binding; C:rough endoplasmic reticulum membrane; C:extracellular exosome; F:protein binding; P:axonogenesis; C:mitochondrion; C:cytosol; F:ubi…		IPR000011 (PRINTS); IPR018965 (SMART); IPR000594 (PFAM); IPR032418 (PFAM); IPR016040 (G3DSA:3.40.50.GENE3D); IPR032420 (PFAM); IPR018965 (PFAM); PTHR10953 (PANTHER); PTHR10953:SF144 (PANTHER); IPR000594 (SUPERFAMILY)
CGI_10003569	Toll-like receptor 2	549	0.7765	P:signal transduction; C:integral component of membrane		PR01537 (PRINTS); IPR000157 (SMART); IPR000157 (G3DSA:3.40.50.GENE3D); IPR000157 (PFAM); PTHR24365:SF316 (PANTHER); PTHR24365 (PANTHER); IPR000157 (PROSITE_PROFILES); IPR000157 (SUPERFAMILY)
CGI_10012076	Mitosis inhibitor kinase wee1 [Crassostrea gigas]	3261	0.499	F:ATP binding; F:protein kinase activity; P:protein phosphorylation		IPR000719 (SMART); G3DSA:1.10.510.10 (GENE3D); IPR022812 (PFAM); IPR000719 (PFAM); IPR027417 (G3DSA:3.40.50.GENE3D); G3DSA:3.30.200.20 (GENE3D); PTHR26392:SF78 (PANTHER); PTHR26392 (PANTHER); IPR000719 (PROSITE_PROFILES); IPR011009 (SUPERFAMILY); IPR027417 (SUPERFAMILY)
CGI_10014040	E3 ubiquitin- ligase MIB2	3819	0.599	F:ubiquitin-protein transferase activity; F:zinc ion binding; F:ligase activity; P:protein ubiquitination		IPR002110 (SMART); IPR000433 (SMART); IPR000433 (PFAM); IPR020683 (G3DSA:1.25.40.GENE3D); IPR020683 (PFAM); IPR010606 (PFAM); IPR007946 (PFAM); PTHR24202 (PANTHER); PTHR24202:SF4 (PANTHER); IPR000433 (PROSITE_PROFILES); IPR020683 (PROSITE_PROFILES); IPR002110 (PROSITE_PROFILES); IPR010606 (PROSITE_PROFILES); SSF159034 (SUPERFAMILY); SSF159034 (SUPERFAMILY); IPR020683 (SUPERFAMILY); SSF57850 (SUPE…
CGI_10019390	importin-4-like [Crassostrea gigas]	3282	0.663	C:nuclear part; P:protein import into nucleus; F:Ran GTPase binding		IPR001494 (PFAM); IPR011989 (G3DSA:1.25.10.GENE3D); IPR000357 (PFAM); PTHR10527:SF6 (PANTHER); PTHR10527 (PANTHER); IPR001494 (PROSITE_PROFILES); IPR021133 (PROSITE_PROFILES); IPR016024 (SUPERFAMILY); IPR016024 (SUPERFAMILY)
CGI_10008056	histone H4-like	312	1	F:protein domain specific binding; P:positive regulation of gene expression, epigenetic; P:cellular protein metabolic process; P:DNA-templated transcription, initiation; P:negative regulation of megakaryocyte differentiation; C:nucleosome; P:double-strand break repair via nonhomologous end joining; P:protein heterotetramerization; P:beta-catenin-TCF complex assembly; C:nuclear chromosome, telomer…		IPR001951 (PRINTS); IPR001951 (SMART); IPR004823 (SMART); IPR009072 (G3DSA:1.10.20.GENE3D); PF15511 (PFAM); PTHR10484 (PANTHER); IPR009072 (SUPERFAMILY)
CGI_10015370	E3 ubiquitin- ligase MIB2	2334	0.5885	F:ubiquitin-protein transferase activity; F:metal ion binding; C:voltage-gated calcium channel complex; P:calcium ion transmembrane transport; P:phosphorylation; P:regulation of calcium ion transport; F:calcium channel regulator activity; F:kinase activity; F:ligase activity; P:protein ubiquitination		IPR002035 (SMART); IPR002035 (PFAM); IPR002035 (G3DSA:3.40.50.GENE3D); IPR002035 (PROSITE_PROFILES); IPR002035 (SUPERFAMILY)
CGI_10002700	UPF0568 C14orf166 homolog	669	0.7145	F:identical protein binding; C:cytoplasm; P:tRNA splicing, via endonucleolytic cleavage and ligation; P:positive regulation of transcription from RNA polymerase II promoter; F:RNA polymerase II core binding; C:nucleoplasm; C:tRNA-splicing ligase complex; F:poly(A) RNA binding
CGI_10000334	Chaperone dnaJ	2427	0.6675			IPR009836 (PFAM); PTHR34365 (PANTHER); PTHR34365:SF2 (PANTHER)
CGI_10021627	poly [ADP-ribose] polymerase 14-like	1188	0.9267	F:nucleotide binding; F:nucleic acid binding; P:metabolic process; F:NAD+ ADP-ribosyltransferase activity	EC:2.4.2.30	no IPS match
CGI_10022586	heat shock 70 kDa 12A-like [Crassostrea gigas]	1818	0.634	C:membrane; C:integral component of membrane		G3DSA:3.30.420.40 (GENE3D); IPR013126 (PFAM); G3DSA:3.30.420.40 (GENE3D); PTHR14187 (PANTHER); PTHR14187:SF47 (PANTHER); SSF53067 (SUPERFAMILY); SSF53067 (SUPERFAMILY)
CGI_10018568	isocitrate dehydrogenase [NADP] cytoplasmic-like	1233	0.9	F:magnesium ion binding; P:glyoxylate cycle; C:cytoplasm; F:NAD binding; P:hemopoiesis; F:isocitrate dehydrogenase (NADP+) activity; P:isocitrate metabolic process; P:tricarboxylic acid cycle; P:2-oxoglutarate metabolic process	EC:1.1.1.42
CGI_10017877	Solute carrier family 23 member 2	411	0.6585	P:transmembrane transport; C:membrane; F:transporter activity		PTHR11119:SF3 (PANTHER); IPR006043 (PANTHER)
CGI_10014180	ubiquitin thioesterase L96	3258	0.6625	C:membrane; C:integral component of membrane
CGI_10010983	poly [ADP-ribose] polymerase 12-like	1920	0.7075	P:metabolic process; F:NAD+ ADP-ribosyltransferase activity	EC:2.4.2.30	IPR012317 (G3DSA:3.90.228.GENE3D); IPR012317 (PFAM); PTHR14453 (PANTHER); IPR012317 (PROSITE_PROFILES); SSF56399 (SUPERFAMILY); SSF56399 (SUPERFAMILY); SSF57850 (SUPERFAMILY)
CGI_10008810	Proteasome subunit alpha type-1	759	0.931	P:negative regulation of inflammatory response to antigenic stimulus; C:centrosome; C:extracellular exosome; F:protein binding; C:cytoplasm; C:proteasome core complex, alpha-subunit complex; F:threonine-type endopeptidase activity; P:immune system process; C:nucleoplasm; F:lipopolysaccharide binding; P:ubiquitin-dependent protein catabolic process	EC:3.4.25
CGI_10026336	MAP kinase-activated kinase 5 isoform X2	1458	0.728	C:nucleus; F:ATP binding; F:calmodulin binding; C:cytoplasm; P:positive regulation of DNA metabolic process; P:protein autophosphorylation; P:regulation of cellular macromolecule biosynthetic process; F:calmodulin-dependent protein kinase activity; P:Ras protein signal transduction; P:peptidyl-serine phosphorylation; F:calcium-dependent protein serine/threonine kinase activity	EC:2.7.11.17
CGI_10023912	la-related 6-like	1662	0.8095	C:nucleus; F:ATP binding; F:RNA binding; C:intracellular ribonucleoprotein complex; F:protein kinase activity; P:RNA processing; P:protein phosphorylation
CGI_10007647	15-hydroxyprostaglandin dehydrogenase [NAD(+)]	384	0.6845	C:integral component of membrane; P:oxidation-reduction process; F:alcohol dehydrogenase (NAD) activity	EC:1.1.1.1
CGI_10017654	NF-kappa-B inhibitor alpha-like [Biomphalaria glabrata]	1032	0.604
CGI_10027540	Mannose-1-phosphate guanyltransferase beta	435	0.9105	P:biosynthetic process; F:mannose-1-phosphate guanylyltransferase activity	EC:2.7.7.13
CGI_10014970	guanine nucleotide-binding G(s) subunit alpha [Papilio xuthus]	1296	0.718	F:GTP binding; P:G-protein coupled receptor signaling pathway; P:small GTPase mediated signal transduction; F:GTPase activity; P:metabolic process; F:G-protein beta/gamma-subunit complex binding; F:signal transducer activity; C:intracellular
CGI_10001841	hypothetical protein CGI_10001841	546	0.6587	F:GTP binding; P:signal transduction; C:membrane		no IPS match
CGI_10005365	eosinophil peroxidase-like isoform X1 [Crassostrea gigas]	195	0.866	F:peroxidase activity; P:response to oxidative stress; P:cellular oxidant detoxification; P:oxidation-reduction process; F:heme binding	EC:1.11.1.7	no IPS match
CGI_10022452	Small nuclear ribonucleo E [Salmo salar]	273	0.9455	C:U5 snRNP; C:U2 snRNP; C:U1 snRNP; C:U4 snRNP; P:spliceosomal snRNP assembly; C:pICln-Sm protein complex; F:RNA binding; C:methylosome; C:precatalytic spliceosome; C:SMN-Sm protein complex; C:U4/U6 x U5 tri-snRNP complex; C:cytosol; C:viral nucleocapsid
CGI_10004628	nuclear transcription factor Y subunit gamma [Callorhinchus milii]	945	0.889	C:CCAAT-binding factor complex; F:transcriptional activator activity, RNA polymerase II core promoter proximal region sequence-specific binding; F:protein heterodimerization activity; P:transcription, DNA-templated; P:retina development in camera-type eye; F:RNA polymerase II core promoter proximal region sequence-specific DNA binding; C:integral component of membrane; C:protein-DNA complex; F:tr…		IPR009072 (G3DSA:1.10.20.GENE3D); IPR003958 (PFAM); PTHR10252 (PANTHER); IPR027170 (PTHR10252:PANTHER); IPR009072 (SUPERFAMILY)
CGI_10006122	eukaryotic translation initiation factor 3 subunit K isoform X2	651	0.7875	F:translation initiation factor activity; P:formation of translation preinitiation complex; C:eukaryotic 43S preinitiation complex; F:ribosome binding; C:eukaryotic 48S preinitiation complex; P:regulation of translational initiation; C:eukaryotic translation initiation factor 3 complex
CGI_10014533	Interferon-induced 44	1083	0.9315	F:GTP binding
CGI_10018148	Tripartite motif-containing 45	1902	0.621	F:zinc ion binding; C:intracellular		IPR001841 (SMART); IPR011042 (G3DSA:2.120.10.GENE3D); IPR013083 (G3DSA:3.30.40.GENE3D); IPR018957 (PFAM); PTHR24103 (PANTHER); IPR000315 (PROSITE_PROFILES); IPR001841 (PROSITE_PROFILES); SSF57850 (SUPERFAMILY); SSF101898 (SUPERFAMILY)
CGI_10011652	disulfide-isomerase A3	1479	0.7665	F:protein disulfide isomerase activity; P:metabolic process; C:endoplasmic reticulum; P:cell redox homeostasis; P:protein folding	EC:5.3.4.1
CGI_10018824	oxysterol-binding -related 1-like	246	0.8933			no IPS match
CGI_10002146	ADAM family mig-17	468	0.662	P:proteolysis; F:metalloendopeptidase activity	EC:3.4.24	IPR001590 (PFAM); IPR024079 (G3DSA:3.40.390.GENE3D); PTHR11905 (PANTHER); IPR001590 (PROSITE_PROFILES); SSF55486 (SUPERFAMILY)
CGI_10005256	Eukaryotic translation initiation factor 3 subunit J	576	0.7635	F:translation initiation factor activity; P:formation of translation preinitiation complex; C:eukaryotic 43S preinitiation complex; C:eukaryotic 48S preinitiation complex; P:regulation of translational initiation; C:eukaryotic translation initiation factor 3 complex
CGI_10019470	ruvB-like 2	1428	0.9525	P:positive regulation of histone acetylation; P:histone H4 acetylation; P:DNA repair; P:regulation of heart growth; C:NuA4 histone acetyltransferase complex; P:histone H2A acetylation; F:RNA polymerase II core promoter sequence-specific DNA binding; C:Swr1 complex; P:epithelial cilium movement; P:motile cilium assembly; F:RNA polymerase II distal enhancer sequence-specific DNA binding; F:ATP bind…	EC:3.6.1	IPR003593 (SMART); G3DSA:1.10.8.60 (GENE3D); IPR010339 (PFAM); IPR027417 (G3DSA:3.40.50.GENE3D); IPR027238 (PANTHER); IPR027417 (SUPERFAMILY)
CGI_10026577	ectonucleotide pyrophosphatase phosphodiesterase family member 5	1506	0.67	F:catalytic activity; P:metabolic process; C:integral component of membrane		IPR017849 (G3DSA:3.40.720.GENE3D); IPR002591 (PFAM); IPR024873 (PANTHER); IPR017850 (SUPERFAMILY)
CGI_10024818	glucosidase 2 subunit beta isoform X2 [Monodelphis domestica]	1545	0.664	P:pronephros development; F:calcium ion binding; P:liver development; P:N-glycan processing
CGI_10022853	D-2-hydroxyglutarate mitochondrial-like	1236	0.7295	F:oxidoreductase activity, acting on CH-OH group of donors; F:flavin adenine dinucleotide binding; C:membrane; P:oxidation-reduction process
CGI_10008978	hypothetical protein CGI_10008978	852	0.6325	F:GTP binding; P:signal transduction; C:membrane
CGI_10014131	alkaline phosphatase-like isoform X1 [Crassostrea gigas]	2484	0.739	F:phosphatase activity; P:dephosphorylation	EC:3.1.3.41
CGI_10018119	nicalin isoform X3	1647	0.787	C:endoplasmic reticulum membrane; C:integral component of membrane; P:regulation of signal transduction
CGI_10024490	[Physcomitrella patens]	963	0.653	C:membrane; P:tRNA splicing, via endonucleolytic cleavage and ligation; F:transferase activity, transferring phosphorus-containing groups; F:ligase activity		IPR006553 (SMART); IPR002745 (PFAM); IPR032675 (G3DSA:3.80.10.GENE3D); PTHR24006 (PANTHER); SSF56399 (SUPERFAMILY); SSF52047 (SUPERFAMILY)
CGI_10026326	ATP-dependent RNA helicase partial	1845	0.8735	F:ATP binding; F:RNA binding; P:metabolic process; F:helicase activity		IPR025313 (SMART); IPR001650 (SMART); IPR025313 (PFAM); IPR027417 (G3DSA:3.40.50.GENE3D); IPR011545 (PFAM); IPR027417 (G3DSA:3.40.50.GENE3D); IPR001650 (PFAM); PTHR24031 (PANTHER); PTHR24031:SF54 (PANTHER); PTHR24031 (PANTHER); PTHR24031:SF54 (PANTHER); IPR001650 (PROSITE_PROFILES); IPR014001 (PROSITE_PROFILES); IPR027417 (SUPERFAMILY)
CGI_10005391	placenta-specific gene 8 -like	384	0.629	F:nucleotide binding
CGI_10022112	Translational activator GCN1	6327	0.7575	C:gap junction; P:regulation of translation; F:protein kinase binding; P:ion transport; P:regulation of protein kinase activity; F:ribosome binding; P:cellular response to amino acid starvation; C:integral component of membrane; P:positive regulation of kinase activity; F:protein kinase regulator activity; C:intracellular part		SM01349 (SMART); IPR000990 (PFAM); IPR011989 (G3DSA:1.25.10.GENE3D); IPR026827 (PANTHER); IPR033173 (PTHR23346:PANTHER); IPR021133 (PROSITE_PROFILES); IPR000990 (PROSITE_PROFILES); IPR016024 (SUPERFAMILY); IPR016024 (SUPERFAMILY); IPR016024 (SUPERFAMILY)
CGI_10022187	cAMP-responsive element modulator isoform X3	858	0.7205	C:nucleus; F:transcription factor activity, sequence-specific DNA binding; P:regulation of transcription, DNA-templated; F:sequence-specific DNA binding; P:single-organism process
CGI_10020463	prolyl endopeptidase	2121	0.829	C:nucleus; C:cytoplasm; C:membrane; P:proteolysis; F:serine-type endopeptidase activity; F:serine-type exopeptidase activity	EC:3.4.21
CGI_10028653	Polyribonucleotide nucleotidyltransferase mitochondrial	2007	0.6895	P:RNA phosphodiester bond hydrolysis, exonucleolytic; F:3'-5'-exoribonuclease activity; F:RNA binding; P:RNA processing; P:mRNA catabolic process; F:polyribonucleotide nucleotidyltransferase activity	EC:3.1.13; EC:2.7.7.8	IPR004087 (SMART); IPR027408 (G3DSA:3.30.230.GENE3D); IPR004088 (PFAM); IPR004088 (G3DSA:3.30.1370.GENE3D); IPR015847 (PFAM); IPR015848 (G3DSA:1.10.10.GENE3D); IPR015848 (PFAM); IPR001247 (PFAM); IPR012162 (TIGRFAM); IPR012162 (PANTHER); PTHR11252:SF3 (PANTHER); IPR004088 (PROSITE_PROFILES); IPR020568 (SUPERFAMILY); IPR015847 (SUPERFAMILY); IPR015847 (SUPERFAMILY); IPR004088 (SUPERFAMILY); IPR015…
CGI_10007303	C-C chemokine receptor type 7-like [Crassostrea gigas]	1104	0.5535	F:G-protein coupled receptor activity; P:G-protein coupled receptor signaling pathway; C:integral component of membrane
CGI_10024681	dolichyl-diphosphooligosaccharide-- glycosyltransferase subunit 2-like	1143	0.762	C:oligosaccharyltransferase complex; C:integral component of membrane; P:protein N-linked glycosylation; F:transferase activity
CGI_10017734	Ankyrin repeat domain-containing 50	495	0.6765
CGI_10020746	proliferation-associated 2G4	1155	0.83
CGI_10005764	GDP-fucose O-fucosyltransferase 1	1179	0.726	F:transferase activity, transferring glycosyl groups; P:metabolic process
CGI_10023523	mitochondrial import receptor subunit TOM40 homolog 1-like	1050	0.7595	P:transmembrane transport; C:mitochondrial outer membrane
CGI_10023106	slit homolog 3 -like [Lingula anatina]	2016	0.599	P:signal transduction; C:integral component of membrane
CGI_10004711	centrosomal of 85 kDa-like isoform X1 [Crassostrea gigas]	342	1			no IPS match
CGI_10001818	uridine phosphorylase 1-like	936	0.812	C:cytoplasm; P:nucleotide catabolic process; P:nucleoside metabolic process; F:uridine phosphorylase activity	EC:2.4.2.3	IPR000845 (G3DSA:3.40.50.GENE3D); IPR000845 (PFAM); IPR010059 (TIGRFAM); IPR018017 (PANTHER); PTHR21234:SF15 (PANTHER); IPR000845 (SUPERFAMILY)
CGI_10003308	MAP kinase-activated kinase 2	1080	0.864	P:response to cytokine; P:3'-UTR-mediated mRNA stabilization; P:inner ear development; P:p38MAPK cascade; P:protein autophosphorylation; F:calmodulin-dependent protein kinase activity; F:signal transducer activity; C:nucleoplasm; F:calcium-dependent protein serine/threonine kinase activity; P:positive regulation of tumor necrosis factor biosynthetic process; P:toll-like receptor signaling pathway…	EC:2.7.11.17
CGI_10023804	endochitinase A-like [Crassostrea gigas]	690	0.699	C:viral capsid		IPR004302 (PFAM); PTHR21113 (PANTHER)
CGI_10004802	Mid1-interacting 1A [Trichinella pseudospiralis]	498	0.5995	C:membrane; C:integral component of membrane
CGI_10019717	Toll-like receptor 2	477	0.732	P:signal transduction		PR01537 (PRINTS); IPR000157 (SMART); IPR000157 (PFAM); IPR000157 (G3DSA:3.40.50.GENE3D); PTHR24365 (PANTHER); PTHR24365:SF374 (PANTHER); IPR000157 (PROSITE_PROFILES); IPR000157 (SUPERFAMILY)
CGI_10018706	GTP-binding RAD [Crassostrea gigas]	1125	0.609	F:GTP binding; P:small GTPase mediated signal transduction; C:membrane; P:protein transport; C:intracellular		PR00449 (PRINTS); SM00174 (SMART); SM00175 (SMART); SM00173 (SMART); IPR001806 (PFAM); IPR027417 (G3DSA:3.40.50.GENE3D); IPR005225 (TIGRFAM); IPR020849 (PANTHER); PTHR24070:SF183 (PANTHER); IPR020849 (PROSITE_PROFILES); IPR027417 (SUPERFAMILY)
CGI_10025420	growth differentiation factor 8	1128	0.5225	F:growth factor activity; C:extracellular region; P:growth		IPR001839 (SMART); IPR001839 (PFAM); IPR001111 (PFAM); IPR029034 (G3DSA:2.10.90.GENE3D); IPR015615 (PANTHER); PTHR11848:SF161 (PANTHER); IPR001839 (PROSITE_PROFILES); IPR029034 (SUPERFAMILY)
CGI_10010742	ethanolamine kinase 1-like	1053	0.6635	P:phosphorylation; F:kinase activity
CGI_10004110	sequestosome-1 isoform X2	1326	0.496	F:zinc ion binding; F:protein binding; C:intracellular membrane-bounded organelle; C:cytoplasmic part; P:cellular process
CGI_10013165	hypothetical protein CGI_10013165	381	0.6341
CGI_10025223	hypothetical protein CGI_10025223	480	1	C:integral component of membrane
CGI_10008058	histone H2A [Crassostrea gigas]	381	0.989	C:nucleus; F:DNA binding; F:protein heterodimerization activity; C:nucleosome		IPR002119 (PRINTS); IPR002119 (SMART); IPR032454 (PFAM); IPR009072 (G3DSA:1.10.20.GENE3D); IPR007125 (PFAM); PTHR23430 (PANTHER); IPR009072 (SUPERFAMILY)
CGI_10014835	26S proteasome non-ATPase regulatory subunit 8-like	798	0.855	C:nucleus; P:proteasome-mediated ubiquitin-dependent protein catabolic process; C:cytosol; C:proteasome regulatory particle, lid subcomplex; P:proteasome assembly
CGI_10018918	T-complex 1 subunit alpha	2100	0.904	F:ATP binding; C:cytoplasm; F:unfolded protein binding; P:protein folding
CGI_10005188	Neuronal acetylcholine receptor subunit alpha-6	1359	0.609	P:ion transmembrane transport; C:integral component of membrane; F:extracellular ligand-gated ion channel activity
CGI_10015198	hypothetical protein CGI_10015198	471	1	C:integral component of membrane		no IPS match
CGI_10023092	hypothetical protein CGI_10023092	537	0.99	C:integral component of membrane
CGI_10028750	nuclear factor NF-kappa-B p105 subunit-like	4473	0.767	C:nucleus; F:DNA binding; F:transcription factor activity, sequence-specific DNA binding; C:cytoplasm; P:signal transduction; P:regulation of transcription, DNA-templated		IPR000451 (PRINTS); IPR002909 (SMART); IPR000488 (SMART); IPR002110 (SMART); PF13637 (PFAM); IPR000488 (PFAM); IPR011539 (PFAM); IPR011029 (G3DSA:1.10.533.GENE3D); IPR011539 (G3DSA:2.60.40.GENE3D); IPR020683 (PFAM); IPR020683 (G3DSA:1.25.40.GENE3D); IPR013783 (G3DSA:2.60.40.GENE3D); IPR032397 (PFAM); IPR000451 (PANTHER); IPR011539 (PROSITE_PROFILES); IPR020683 (PROSITE_PROFILES); IPR002110 (PROSI…
CGI_10023612	Eukaryotic translation initiation factor 3 subunit A	3243	0.8405	F:translation initiation factor activity; P:formation of translation preinitiation complex; C:eukaryotic 43S preinitiation complex; C:eukaryotic 48S preinitiation complex; P:regulation of translational initiation; C:eukaryotic translation initiation factor 3 complex
CGI_10024279	threonine--tRNA cytoplasmic isoform X1 [Bactrocera oleae]	924	0.8725	F:ATP binding; F:RNA binding; C:cytoplasm; F:threonine-tRNA ligase activity; P:threonyl-tRNA aminoacylation	EC:6.1.1.3	IPR002320 (PRINTS); G3DSA:3.30.930.10 (GENE3D); IPR004154 (G3DSA:3.40.50.GENE3D); IPR002314 (PFAM); IPR004154 (PFAM); PTHR11451 (PANTHER); PTHR11451:SF25 (PANTHER); IPR006195 (PROSITE_PROFILES); IPR004154 (SUPERFAMILY); SSF55681 (SUPERFAMILY)
CGI_10018051	hypothetical protein CGI_10018051	561	0.8233			no IPS match
CGI_10012353	Aldose 1-epimerase	1677	0.5344	F:chitin binding; P:chitin metabolic process; C:extracellular region
CGI_10013586	Toll-like receptor 1	579	0.737	P:signal transduction
CGI_10022434	ribosomal L1 domain-containing 1-like [Aplysia californica]	1632	0.6925	F:RNA binding
CGI_10002181	macrophage-expressed gene 1 -like [Crassostrea gigas]	2229	0.71	C:integral component of membrane		IPR020864 (SMART); IPR020864 (PFAM); PTHR31463 (PANTHER); IPR020864 (PROSITE_PROFILES)
CGI_10024859	transmembrane 180-like	1428	0.644	C:integral component of membrane
CGI_10000136	ETS-related transcription factor Elf-3	153	0.9395	P:mammary gland involution; F:RNA polymerase II core promoter proximal region sequence-specific DNA binding; P:transcription from RNA polymerase II promoter; C:Golgi apparatus; P:positive regulation of transcription from RNA polymerase II promoter; C:nucleoplasm; P:epithelial cell differentiation; F:transcriptional activator activity, RNA polymerase II core promoter proximal region sequence-speci…		IPR000418 (PRINTS); IPR000418 (SMART); IPR011991 (G3DSA:1.10.10.GENE3D); IPR000418 (PFAM); PTHR11849 (PANTHER); IPR033074 (PTHR11849:PANTHER); IPR000418 (PROSITE_PROFILES); IPR011991 (SUPERFAMILY)
CGI_10005314	Bifunctional purine biosynthesis PURH	1488	0.8345	P:purine nucleotide biosynthetic process; F:IMP cyclohydrolase activity; F:phosphoribosylaminoimidazolecarboxamide formyltransferase activity	EC:3.5.4.10; EC:2.1.2.3	IPR002695 (SMART); IPR002695 (PIRSF); IPR024050 (G3DSA:1.10.287.GENE3D); IPR011607 (G3DSA:3.40.50.GENE3D); IPR002695 (PFAM); IPR024051 (G3DSA:3.40.140.GENE3D); IPR024051 (G3DSA:3.40.140.GENE3D); PTHR11692:SF0 (PANTHER); IPR002695 (PANTHER); IPR011607 (SUPERFAMILY); IPR016193 (SUPERFAMILY)
CGI_10019584	26S protease regulatory subunit 6B	1263	0.9505	F:ATP binding; C:cytoplasm; P:protein catabolic process; P:proteolysis; F:peptidase activity; P:protein refolding		IPR003593 (SMART); IPR003959 (PFAM); IPR027417 (G3DSA:3.40.50.GENE3D); IPR005937 (TIGRFAM); G3DSA:1.10.8.60 (GENE3D); PTHR23073:SF8 (PANTHER); PTHR23073 (PANTHER); IPR027417 (SUPERFAMILY)
CGI_10011115	---NA---	483
CGI_10013977	cap-specific mRNA (nucleoside-2 -O-)-methyltransferase 1-like	2400	0.7335	F:nucleic acid binding; C:nucleus; P:7-methylguanosine mRNA capping; F:mRNA (nucleoside-2'-O-)-methyltransferase activity; P:cap1 mRNA methylation	EC:2.1.1.57
CGI_10023772	transmembrane 165	879	0.8155	C:integral component of membrane		IPR001727 (PFAM); IPR001727 (PANTHER); PTHR12608:SF1 (PANTHER); PS51257 (PROSITE_PROFILES)
CGI_10024343	exosome complex component RRP41-like	738	0.8785	P:nucleic acid phosphodiester bond hydrolysis; P:U4 snRNA 3'-end processing; F:tRNA nucleotidyltransferase activity; P:DNA deamination; C:nucleolus; C:cytoplasmic exosome (RNase complex); F:AU-rich element binding; C:nuclear exosome (RNase complex); P:positive regulation of cell growth; P:polyadenylation-dependent snoRNA 3'-end processing; P:maturation of 5.8S rRNA; F:exonuclease activity; P:hist…	EC:2.7.7.56
CGI_10012956	cat eye syndrome critical region 5-like [Crassostrea gigas]	231	0.92			no IPS match
CGI_10020867	116 kDa U5 small nuclear ribonucleo component	2952	0.9055	F:GTP binding; F:GTPase activity; P:metabolic process		IPR000795 (PRINTS); IPR000640 (SMART); IPR005517 (SMART); IPR027417 (G3DSA:3.40.50.GENE3D); IPR000640 (PFAM); G3DSA:2.40.30.10 (GENE3D); IPR005225 (TIGRFAM); IPR004161 (PFAM); IPR009022 (PFAM); G3DSA:3.30.70.870 (GENE3D); IPR014721 (G3DSA:3.30.230.GENE3D); PF00009 (PFAM); IPR000640 (G3DSA:3.30.70.GENE3D); IPR005517 (PFAM); IPR031950 (PFAM); G3DSA:3.90.1430.10 (GENE3D); PTHR23115 (PANTHER); PTHR23…
CGI_10027973	Target of EGR1 1	960	0.702	F:nucleic acid binding; C:nucleus
CGI_10023433	tetraspanin-18-like isoform X3	1107	0.5775	C:membrane; C:integral component of membrane
CGI_10019168	DNA-directed RNA polymerase III subunit RPC4-like [Lingula anatina]	1128	0.5475	F:DNA binding; F:DNA-directed RNA polymerase activity; P:transcription from RNA polymerase III promoter; C:DNA-directed RNA polymerase III complex	EC:2.7.7.6
CGI_10007070	spermatogenesis-associated serine-rich 2-like isoform X1	1839	0.648
CGI_10014349	transmembrane 214	1554	0.6345	C:cytoplasm; C:integral component of membrane
CGI_10008778	ribosome biogenesis WDR12 homolog	1284	0.731	P:maturation of LSU-rRNA from tricistronic rRNA transcript (SSU-rRNA, 5.8S rRNA, LSU-rRNA); F:ribonucleoprotein complex binding; C:nucleolus; P:maturation of 5.8S rRNA from tricistronic rRNA transcript (SSU-rRNA, 5.8S rRNA, LSU-rRNA); C:nucleoplasm; C:preribosome, large subunit precursor		IPR020472 (PRINTS); IPR001680 (SMART); IPR015943 (G3DSA:2.130.10.GENE3D); IPR015943 (G3DSA:2.130.10.GENE3D); IPR001680 (PFAM); IPR012972 (PFAM); PTHR19855 (PANTHER); IPR028599 (HAMAP); IPR001680 (PROSITE_PROFILES); IPR017986 (PROSITE_PROFILES); IPR017986 (SUPERFAMILY)
CGI_10028028	VWA domain-containing [Tolypothrix campylonemoides]	2730	0.7095	F:GTP binding; P:signal transduction; C:membrane
CGI_10023604	[Nematostella vectensis]	3744	0.621	P:carbohydrate metabolic process; F:beta-N-acetylhexosaminidase activity; F:polysaccharide binding	EC:3.2.1.52
CGI_10002756	macrophage mannose receptor 1-like	1902	0.459
CGI_10007439	peptidyl-prolyl cis-trans isomerase G-like	1599	0.985
CGI_10020204	Methylosome subunit pICln	864	0.673	P:cellular component organization; C:cytoplasmic part; P:single-organism process		IPR003521 (PRINTS); PF03517 (PFAM); PTHR21399 (PANTHER); PTHR21399:SF0 (PANTHER)
CGI_10004022	marginal zone B- and B1-cell-specific -like	630	0.6185	P:regulation of immune system process
CGI_10004090	Sodium leak channel non-selective	1017	0.61
CGI_10000304	eukaryotic initiation factor 4A-I	336	0.825	P:negative regulation of RNA-directed RNA polymerase activity; P:translational initiation; P:regulation of translational initiation; P:nuclear-transcribed mRNA poly(A) tail shortening; F:ATP-dependent RNA helicase activity; F:poly(A) RNA binding; F:translation initiation factor activity; F:ATP binding; C:perinuclear region of cytoplasm; F:protein binding; C:eukaryotic translation initiation facto…
CGI_10018417	HMG box transcription factor BBX isoform X1 [Stegastes partitus]	369	0.8385			IPR009071 (SMART); IPR009071 (G3DSA:1.10.30.GENE3D); IPR009071 (PFAM); PTHR13059 (PANTHER); IPR009071 (PROSITE_PROFILES); IPR009071 (SUPERFAMILY)
CGI_10012734	hsp70-binding 1-like	969	0.644	P:negative regulation of catalytic activity; F:enzyme inhibitor activity
CGI_10012078	probable inactive serine threonine- kinase DDB_G0274613 [Crassostrea gigas]	3003	0.5815	F:ATP binding; C:integral component of membrane; F:protein serine/threonine kinase activity; P:protein phosphorylation	EC:2.7.11	IPR000719 (SMART); G3DSA:3.30.200.20 (GENE3D); IPR027417 (G3DSA:3.40.50.GENE3D); IPR022812 (PFAM); G3DSA:1.10.510.10 (GENE3D); IPR001245 (PFAM); PTHR26392 (PANTHER); PTHR26392:SF78 (PANTHER); IPR000719 (PROSITE_PROFILES); IPR027417 (SUPERFAMILY); IPR011009 (SUPERFAMILY)
CGI_10006046	IMPACT isoform X1	3648	0.6485	F:G-protein coupled receptor activity; P:G-protein coupled receptor signaling pathway; P:negative regulation of macromolecule metabolic process; C:integral component of membrane; P:regulation of gene expression; P:regulation of cellular protein metabolic process; P:regulation of cellular macromolecule biosynthetic process; P:cellular response to starvation; P:regulation of nitrogen compound metab…
CGI_10002339	DNA-directed RNA polymerase I subunit RPA2	3429	0.7495	F:DNA binding; C:DNA-directed RNA polymerase I complex; F:RNA polymerase I activity; F:ribonucleoside binding; P:transcription from RNA polymerase I promoter		IPR007645 (PFAM); IPR007642 (PFAM); IPR007120 (PFAM); IPR007644 (PFAM); IPR007120 (G3DSA:2.40.270.GENE3D); IPR009674 (PFAM); IPR007642 (G3DSA:3.90.1110.GENE3D); G3DSA:3.90.1100.10 (GENE3D); IPR007641 (PFAM); IPR015712 (PANTHER); PTHR20856:SF5 (PANTHER); SSF64484 (SUPERFAMILY)
CGI_10025111	hypothetical protein CGI_10025111	165	1			IPR011489 (PROSITE_PROFILES)
CGI_10017950	adenosine receptor A2b	1152	0.5435	F:G-protein coupled receptor activity; P:G-protein coupled receptor signaling pathway; C:integral component of membrane		IPR000276 (PRINTS); G3DSA:1.20.1070.10 (GENE3D); IPR000276 (PFAM); PTHR24249 (PANTHER); IPR017452 (PROSITE_PROFILES); SSF81321 (SUPERFAMILY)
CGI_10013896	interferon-related developmental regulator 1-like	858	0.7055	C:nucleus		IPR007701 (PFAM); IPR011989 (G3DSA:1.25.10.GENE3D); PTHR12354:SF8 (PANTHER); PTHR12354 (PANTHER); IPR016024 (SUPERFAMILY)
CGI_10006114	mcKusick-Kaufman Bardet-Biedl syndromes chaperonin	1716	0.5305	F:ATP binding; P:regulation of biological quality; P:system process; P:regulation of cellular process; P:head development; P:cilium assembly; C:cell part; F:unfolded protein binding; P:animal organ development; P:protein folding
CGI_10028436	multifunctional ADE2-like	1269	0.826	F:ATP binding; P:adenine biosynthetic process; F:phosphoribosylaminoimidazole carboxylase activity; F:phosphoribosylaminoimidazolesuccinocarboxamide synthase activity; P:'de novo' IMP biosynthetic process; C:cytosol	EC:6.3.2.6; EC:4.1.1.21	IPR000031 (SMART); IPR000031 (G3DSA:3.40.50.GENE3D); G3DSA:3.30.200.20 (GENE3D); IPR013816 (G3DSA:3.30.470.GENE3D); IPR000031 (PFAM); IPR028923 (PFAM); PTHR11609 (PANTHER); PTHR11609:SF3 (PANTHER); IPR028923 (HAMAP); IPR033626 (HAMAP); SSF56104 (SUPERFAMILY); IPR000031 (SUPERFAMILY)
CGI_10018786	tumor necrosis factor ligand superfamily member 10-like	1014	0.5223	P:immune response; C:integral component of membrane; F:tumor necrosis factor receptor binding
CGI_10010029	sec1 family domain-containing 1	1902	0.846	P:vesicle docking involved in exocytosis; P:fin regeneration		IPR001619 (PIRSF); G3DSA:3.40.50.2060 (GENE3D); IPR027482 (G3DSA:3.40.50.GENE3D); IPR001619 (PFAM); G3DSA:1.25.40.60 (GENE3D); G3DSA:3.90.830.10 (GENE3D); PTHR11679:SF2 (PANTHER); IPR001619 (PANTHER); IPR001619 (SUPERFAMILY)
CGI_10023542	Spore cortex-lytic enzyme	489	0.707	P:metabolic process; F:hydrolase activity
CGI_10023178	Ankyrin repeat domain-containing 50	909	0.6365	C:membrane; C:integral component of membrane
CGI_10024479	ran guanine nucleotide release factor	561	0.7165			IPR016123 (G3DSA:3.40.1000.GENE3D); IPR007681 (PFAM); PTHR15837:SF0 (PANTHER); PTHR15837 (PANTHER); IPR016123 (SUPERFAMILY)
CGI_10010123	eukaryotic translation initiation factor 4 gamma 3-like isoform X1 [Crassostrea gigas]	3948	0.7635	F:translation initiation factor activity; P:translational initiation
CGI_10007587	60S ribosome subunit biogenesis NIP7 homolog	543	0.903	C:cytoplasm; P:ribosome assembly; C:nucleolus; F:poly(A) RNA binding		IPR002478 (SMART); IPR016686 (PIRSF); IPR005155 (PFAM); IPR015947 (G3DSA:2.30.130.GENE3D); PTHR23415:SF4 (PANTHER); PTHR23415 (PANTHER); IPR002478 (PROSITE_PROFILES); IPR015947 (SUPERFAMILY); SSF88802 (SUPERFAMILY)
CGI_10019709	GDP-Man:Man(3) c(2)-PP-Dol alpha-1,2- partial	1473	0.767	C:integral component of membrane; F:transferase activity		IPR031814 (PFAM); IPR001296 (PFAM); G3DSA:3.40.50.2000 (GENE3D); PTHR12526 (PANTHER); PTHR12526:SF315 (PANTHER); SSF53756 (SUPERFAMILY)
CGI_10024696	WD repeat-containing 43	1893	0.663	C:microtubule cytoskeleton; C:cytoskeletal part; P:establishment of localization in cell; F:binding; P:microtubule-based process; P:establishment of organelle localization
CGI_10020335	26S proteasome non-ATPase regulatory subunit 14	936	0.943	C:proteasome complex
CGI_10004743	estrogen sulfotransferase-like	606	0.7405	P:integrin-mediated signaling pathway; P:metabolic process; F:sulfotransferase activity; P:cell adhesion; C:integrin complex
CGI_10007085	hypothetical protein CGI_10007085	2325	0.655	F:metal ion binding		IPR013087 (G3DSA:3.30.160.GENE3D); IPR007087 (PROSITE_PROFILES)
CGI_10005385	phenylalanine--tRNA ligase alpha subunit	1488	0.8405	F:ATP binding; C:cytoplasm; F:phenylalanine-tRNA ligase activity; P:phenylalanyl-tRNA aminoacylation; F:tRNA binding	EC:6.1.1.20
CGI_10016363	E3 ubiquitin- ligase XIAP-like isoform X1 [Biomphalaria glabrata]	900	0.534	F:zinc ion binding; F:cysteine-type endopeptidase inhibitor activity; P:negative regulation of apoptotic process; P:cellular process; P:negative regulation of peptidase activity
CGI_10014096	hypothetical protein CGI_10014096	468	0.61	F:zinc ion binding; C:membrane; C:integral component of membrane		no IPS match
CGI_10020645	RING finger 121-like	723	0.8795	F:zinc ion binding; C:integral component of membrane
CGI_10008962	cytosolic phospholipase A2-like isoform X5 [Crassostrea gigas]	2463	0.775	F:phospholipase A2 activity; F:metal ion binding; P:phospholipid catabolic process; C:cytoplasmic part	EC:3.1.1.4
CGI_10011288	Solute carrier family 25 member 44	963	0.547	C:integral component of membrane; P:transport		IPR018108 (PFAM); IPR023395 (G3DSA:1.50.40.GENE3D); PTHR24089:SF41 (PANTHER); PTHR24089 (PANTHER); IPR018108 (PROSITE_PROFILES); IPR023395 (SUPERFAMILY)
CGI_10015364	hypothetical protein CGI_10015364	210	1			no IPS match
CGI_10000138	E3 SUMO- ligase 2-like	675	0.627	F:zinc ion binding; P:intracellular transport; P:metabolic process; C:intracellular; F:ligase activity		IPR000156 (PFAM); IPR011993 (G3DSA:2.30.29.GENE3D); PTHR23138:SF100 (PANTHER); PTHR23138 (PANTHER); IPR000156 (PROSITE_PROFILES); IPR011993 (SUPERFAMILY); IPR011993 (SUPERFAMILY)
CGI_10006203	E3 ubiquitin- ligase DTX3L	1266	0.7205	F:zinc ion binding
CGI_10008928	MAP kinase-activated kinase 2-like	459	0.867	C:nucleus; F:ATP binding; P:MAPK cascade; F:calmodulin binding; C:cytoplasm; P:protein autophosphorylation; F:calmodulin-dependent protein kinase activity; P:cell surface receptor signaling pathway; P:peptidyl-serine phosphorylation; F:signal transducer activity; F:calcium-dependent protein serine/threonine kinase activity	EC:2.7.11.17
CGI_10020925	high-affinity choline transporter 1-like	1629	0.79	P:transmembrane transport; C:integral component of membrane; F:transporter activity		IPR001734 (PFAM); IPR001734 (PANTHER); PTHR11819:SF12 (PANTHER); IPR001734 (PROSITE_PROFILES)
CGI_10020777	AN1-type zinc finger 2A-like isoform X2	846	0.7575	F:zinc ion binding		IPR003903 (SMART); IPR000058 (SMART); IPR000058 (PFAM); IPR003903 (PFAM); IPR000058 (G3DSA:4.10.1110.GENE3D); IPR000058 (G3DSA:4.10.1110.GENE3D); PTHR14677 (PANTHER); PTHR14677:SF15 (PANTHER); IPR000058 (PROSITE_PROFILES); IPR003903 (PROSITE_PROFILES); SSF118310 (SUPERFAMILY); SSF118310 (SUPERFAMILY)
CGI_10016709	S-adenosylmethionine mitochondrial carrier	831	0.7575	F:structural constituent of ribosome; C:integral component of membrane; P:transport; P:translation
CGI_10013237	Glutamate decarboxylase 1	1491	0.731	F:pyridoxal phosphate binding; P:carboxylic acid metabolic process; F:carboxy-lyase activity		IPR015421 (G3DSA:3.40.640.GENE3D); IPR015422 (G3DSA:3.90.1150.GENE3D); IPR002129 (PFAM); PTHR11999 (PANTHER); PTHR11999:SF57 (PANTHER); IPR015424 (SUPERFAMILY)
CGI_10025906	GH20300 [Drosophila grimshawi]	438	0.6355
CGI_10016539	nucleolar 58	1545	0.871	C:box C/D snoRNP complex; C:small-subunit processome; P:rRNA modification; F:snoRNA binding		IPR012976 (SMART); IPR002687 (PFAM); IPR012974 (PFAM); PTHR10894 (PANTHER); PTHR10894:SF1 (PANTHER); IPR002687 (PROSITE_PROFILES); IPR002687 (SUPERFAMILY)
CGI_10019769	RNA-binding 28-like	2457	0.667	F:nucleotide binding; F:nucleic acid binding		IPR003954 (SMART); IPR000504 (SMART); IPR000504 (PFAM); IPR012677 (G3DSA:3.30.70.GENE3D); IPR012677 (G3DSA:3.30.70.GENE3D); IPR012677 (G3DSA:3.30.70.GENE3D); PTHR24012 (PANTHER); PTHR24012:SF442 (PANTHER); IPR000504 (PROSITE_PROFILES); IPR012677 (SUPERFAMILY); IPR012677 (SUPERFAMILY); IPR012677 (SUPERFAMILY)
CGI_10017693	small nuclear ribonucleo F	249	0.9775	P:histone mRNA metabolic process; P:nuclear import; C:U7 snRNP; P:termination of RNA polymerase II transcription; C:U1 snRNP; C:small nucleolar ribonucleoprotein complex; C:nucleoplasm; C:U4 snRNP; P:spliceosomal snRNP assembly; C:U12-type spliceosomal complex; C:pICln-Sm protein complex; F:RNA binding; F:protein binding; C:catalytic step 2 spliceosome; C:methylosome; C:SMN-Sm protein complex; C:…
CGI_10015931	ADP-ribosylation factor 1	570	0.842	F:GTP binding; P:small GTPase mediated signal transduction; P:protein transport; C:intracellular		IPR006689 (PRINTS); SM00175 (SMART); SM00177 (SMART); SM00178 (SMART); IPR006689 (PFAM); IPR005225 (TIGRFAM); IPR027417 (G3DSA:3.40.50.GENE3D); PTHR11711 (PANTHER); IPR024156 (PROSITE_PROFILES); IPR027417 (SUPERFAMILY)
CGI_10007701	ribosome biogenesis BMS1 homolog	3318	0.714	C:nucleus; P:ribosome biogenesis
CGI_10024118	nodal modulator 1-like	3951	0.693	F:carbohydrate binding		IPR014766 (G3DSA:2.60.40.GENE3D); IPR013783 (G3DSA:2.60.40.GENE3D); IPR014766 (G3DSA:2.60.40.GENE3D); PF13620 (PFAM); PTHR23303 (PANTHER); IPR013784 (SUPERFAMILY); SSF49478 (SUPERFAMILY); IPR013784 (SUPERFAMILY)
CGI_10026099	myeloid differentiation primary response 88-like [Crassostrea gigas]	1077	0.7265	P:signal transduction		IPR000157 (SMART); IPR011029 (G3DSA:1.10.533.GENE3D); IPR000488 (PFAM); IPR000157 (PFAM); IPR000157 (G3DSA:3.40.50.GENE3D); PTHR15079 (PANTHER); IPR000488 (PROSITE_PROFILES); IPR000157 (PROSITE_PROFILES); IPR000157 (SUPERFAMILY); IPR011029 (SUPERFAMILY)
CGI_10007948	PREDICTED: uncharacterized protein LOC105334331 [Crassostrea gigas]	777	0.79			no IPS match
CGI_10021194	metallothionein [Crassostrea gigas]	324	0.985	F:metal ion binding
CGI_10005007	serine threonine- phosphatase 2A activator-like	1038	0.7985	F:protein tyrosine phosphatase activator activity; P:protein peptidyl-prolyl isomerization; C:protein phosphatase type 2A complex; P:regulation of phosphoprotein phosphatase activity; F:protein phosphatase type 2A regulator activity; C:nucleus; F:peptidyl-prolyl cis-trans isomerase activity; F:protein binding; C:cytoplasm; P:positive regulation of catalytic activity; P:mitotic spindle organizatio…	EC:5.2.1.8	IPR004327 (PIRSF); IPR004327 (PFAM); PTHR10012:SF0 (PANTHER); IPR004327 (PANTHER); SSF140984 (SUPERFAMILY)
CGI_10026126	N-acetyltransferase 10	3078	0.84	P:metabolic process; C:integral component of membrane; P:negative regulation of telomere maintenance via telomerase; C:telomerase holoenzyme complex; C:nucleolus; F:N-acetyltransferase activity; C:nuclear chromosome, telomeric region; F:poly(A) RNA binding	EC:2.3.1	IPR016181 (G3DSA:3.40.630.GENE3D); IPR027992 (PFAM); IPR000182 (PFAM); IPR013562 (PFAM); IPR007807 (PFAM); IPR033688 (PTHR10925:PANTHER); IPR032672 (PANTHER); IPR033688 (HAMAP)
CGI_10007404	poly [ADP-ribose] polymerase 12-like	1440	0.517	F:metal ion binding; C:integral component of membrane		G3DSA:1.20.1070.10 (GENE3D); IPR000571 (PROSITE_PROFILES)
CGI_10004218	cystatin-A-like [Crassostrea gigas]	297	0.9029
CGI_10000242	116 kDa U5 small nuclear ribonucleo partial	708	0.6355	F:organic cyclic compound binding; F:heterocyclic compound binding; C:nucleoplasm
CGI_10012066	26S proteasome non-ATPase regulatory subunit 1-like	2010	0.8275	C:nucleus; P:proteasome-mediated ubiquitin-dependent protein catabolic process; C:extracellular exosome; C:proteasome regulatory particle, base subcomplex; C:membrane; P:regulation of catalytic activity; F:endopeptidase activity; P:regulation of protein catabolic process; C:proteasome storage granule; F:enzyme regulator activity		IPR016642 (PIRSF); IPR002015 (PFAM); IPR011989 (G3DSA:1.25.10.GENE3D); PTHR10943:SF2 (PANTHER); PTHR10943 (PANTHER); IPR016024 (SUPERFAMILY)
CGI_10015888	placenta-specific gene 8 -like	465	0.7226			IPR006461 (PFAM)
CGI_10023343	kelch domain-containing 8A-like [Octopus bimaculoides]	1038	0.621	C:cytoplasm		IPR006652 (SMART); IPR015915 (G3DSA:2.120.10.GENE3D); IPR015916 (G3DSA:2.130.10.GENE3D); PF13964 (PFAM); IPR006652 (PFAM); PTHR24412:SF123 (PANTHER); PTHR24412 (PANTHER); SSF117281 (SUPERFAMILY); IPR011043 (SUPERFAMILY)
CGI_10015228	[Nematostella vectensis]	1047	0.5779	F:calcium ion binding		IPR002048 (PROSITE_PROFILES); IPR011992 (SUPERFAMILY)
CGI_10008788	PREDICTED: uncharacterized protein LOC105332986 [Crassostrea gigas]	825	1	C:integral component of membrane		no IPS match
CGI_10010609	hypothetical protein CGI_10010609	1335	0.686			IPR001107 (PFAM); IPR001107 (SUPERFAMILY)
CGI_10022210	zinc finger with UFM1-specific peptidase domain -like	1056	0.6985	F:metal ion binding
CGI_10011846	transcription factor kayak-like	288	1			no IPS match
CGI_10023702	endoplasmic reticulum resident 29-like	750	0.7055	C:endoplasmic reticulum lumen; P:protein folding; P:intracellular protein transport; P:protein secretion		IPR011679 (PFAM); IPR012336 (G3DSA:3.40.30.GENE3D); IPR011679 (G3DSA:1.20.1150.GENE3D); IPR012883 (PFAM); PTHR12211 (PANTHER); PTHR12211:SF0 (PANTHER); IPR012336 (SUPERFAMILY); IPR011679 (SUPERFAMILY)
CGI_10012697	probable helicase senataxin	885	0.603	P:metabolic process; F:helicase activity
CGI_10026627	solute carrier family 35 member B1-like	1065	0.78	P:transmembrane transport; C:integral component of membrane		IPR013657 (PFAM); PTHR10778:SF10 (PANTHER); PTHR10778 (PANTHER); SSF103481 (SUPERFAMILY); SSF103481 (SUPERFAMILY)
CGI_10017308	pre-mRNA-splicing regulator WTAP-like [Lingula anatina]	1074	0.791	C:nucleus; P:regulation of alternative mRNA splicing, via spliceosome; P:mRNA methylation		IPR029732 (PFAM); IPR029732 (PTHR15217:PANTHER); PTHR15217 (PANTHER)
CGI_10012244	electroneutral sodium bicarbonate exchanger 1-like isoform X1 [Crassostrea gigas]	3576	0.7095	C:dendrite; P:anion transmembrane transport; P:multicellular organism development; C:integral component of membrane; F:inorganic anion exchanger activity; P:regulation of cellular pH; C:plasma membrane part		IPR003024 (PRINTS); IPR003020 (PRINTS); IPR013769 (PFAM); IPR011531 (PFAM); G3DSA:1.10.287.570 (GENE3D); IPR003020 (TIGRFAM); IPR013769 (G3DSA:3.40.1100.GENE3D); PTHR11453:SF46 (PANTHER); IPR003020 (PANTHER); IPR016152 (SUPERFAMILY)
CGI_10027280	enhancer of split m7 -like	1632	0.64	C:nucleus; F:DNA binding; C:extracellular space; F:endopeptidase inhibitor activity; P:transcription, DNA-templated; P:regulation of transcription, DNA-templated; P:negative regulation of endopeptidase activity; F:protein dimerization activity		IPR011598 (SMART); IPR002110 (SMART); IPR020683 (PFAM); IPR020683 (G3DSA:1.25.40.GENE3D); IPR011598 (G3DSA:4.10.280.GENE3D); IPR003650 (PFAM); IPR011598 (PFAM); PTHR10985:SF77 (PANTHER); PTHR10985 (PANTHER); IPR003650 (PROSITE_PROFILES); IPR020683 (PROSITE_PROFILES); IPR002110 (PROSITE_PROFILES); IPR011598 (PROSITE_PROFILES); IPR020683 (SUPERFAMILY); IPR011598 (SUPERFAMILY); SSF158457 (SUPERFAMIL…
CGI_10026219	hypothetical protein CGI_10026219	417	1	C:integral component of membrane
CGI_10009824	stAR-related lipid transfer mitochondrial	1068	0.591	F:lipid binding		IPR023393 (G3DSA:3.30.530.GENE3D); IPR002913 (PFAM); PTHR19308 (PANTHER); IPR002913 (PROSITE_PROFILES); SSF55961 (SUPERFAMILY)
CGI_10009454	tetratricopeptide repeat 1	765	0.8255	C:peroxisomal membrane		IPR019734 (SMART); IPR001440 (PFAM); IPR011990 (PFAM); IPR011990 (G3DSA:1.25.40.GENE3D); PTHR22904 (PANTHER); PTHR22904:SF356 (PANTHER); IPR019734 (PROSITE_PROFILES); IPR013026 (PROSITE_PROFILES); IPR011990 (SUPERFAMILY)
CGI_10027224	hypothetical protein CGI_10027224	510	1
CGI_10004835	Nucleolar GTP-binding 2	2133	0.795	F:GTP binding; F:GTPase activity; C:membrane; P:ribosome biogenesis; C:nucleolus; F:poly(A) RNA binding		IPR027417 (G3DSA:3.40.50.GENE3D); IPR012971 (PFAM); IPR023179 (G3DSA:1.10.1580.GENE3D); IPR006073 (PFAM); PTHR11089 (PANTHER); IPR024929 (PTHR11089:PANTHER); IPR030378 (PROSITE_PROFILES); IPR027417 (SUPERFAMILY)
CGI_10020678	E3 ubiquitin- ligase MIB2	2328	0.5705	F:ubiquitin-protein transferase activity; F:metal ion binding; F:ligase activity; P:protein ubiquitination		IPR002035 (SMART); IPR010606 (PFAM); IPR002035 (G3DSA:3.40.50.GENE3D); IPR002035 (PFAM); IPR010606 (PROSITE_PROFILES); IPR002035 (PROSITE_PROFILES); IPR002035 (SUPERFAMILY); SSF117839 (SUPERFAMILY); SSF159034 (SUPERFAMILY); SSF159034 (SUPERFAMILY)
CGI_10016690	tankyrase-1-like [Parasteatoda tepidariorum]	1446	0.642	C:intracellular; P:intracellular signal transduction		IPR002110 (PRINTS); IPR001496 (SMART); IPR002110 (SMART); IPR020683 (G3DSA:1.25.40.GENE3D); IPR001496 (PFAM); IPR020683 (G3DSA:1.25.40.GENE3D); IPR020683 (PFAM); IPR020683 (G3DSA:1.25.40.GENE3D); PTHR24133:SF24 (PANTHER); PTHR24133 (PANTHER); IPR002110 (PROSITE_PROFILES); IPR001496 (PROSITE_PROFILES); IPR020683 (PROSITE_PROFILES); IPR001496 (SUPERFAMILY); IPR020683 (SUPERFAMILY)
CGI_10006525	phosphomevalonate kinase	591	0.7495	F:nucleotide binding; C:peroxisome; P:isopentenyl diphosphate biosynthetic process, mevalonate pathway; P:cholesterol biosynthetic process; P:phosphorylation; F:phosphomevalonate kinase activity	EC:2.7.4.2
CGI_10017841	Excitatory amino acid transporter partial	1530	0.7615	P:dicarboxylic acid transport; P:transmembrane transport; F:sodium:dicarboxylate symporter activity; C:integral component of membrane
CGI_10009266	PREDICTED: uncharacterized protein LOC105343647 [Crassostrea gigas]	681	0.75
CGI_10008446	probable histone-binding Caf1 isoform X2	1197	0.8565	C:nucleus; F:ATP binding
CGI_10021215	Transmembrane 62	1863	0.5915	C:integral component of membrane
CGI_10015605	digestive organ expansion factor homolog	2136	0.734	C:small-subunit processome; P:maturation of SSU-rRNA from tricistronic rRNA transcript (SSU-rRNA, 5.8S rRNA, LSU-rRNA); F:U3 snoRNA binding; C:nucleolus; F:rRNA binding		IPR010678 (PFAM); IPR027417 (G3DSA:3.40.50.GENE3D); IPR010678 (PANTHER)
CGI_10026264	PREDICTED: uncharacterized protein LOC105320048 [Crassostrea gigas]	675	1
CGI_10011086	mitochondrial import inner membrane translocase subunit Tim13-like	282	0.8405	F:metal ion binding; C:mitochondrion; P:protein transport
CGI_10028922	Toll-like receptor 13	279	0.7925	P:signal transduction		IPR000157 (G3DSA:3.40.50.GENE3D); IPR000157 (PROSITE_PROFILES); IPR000157 (SUPERFAMILY)
CGI_10019733	DIS3-like exonuclease 2	3525	0.711	P:RNA phosphodiester bond hydrolysis, exonucleolytic; F:3'-5'-exoribonuclease activity; F:RNA binding; P:rRNA metabolic process; F:metal ion binding; C:cytoplasmic mRNA processing body; P:cellular component organization or biogenesis; P:polyuridylation-dependent mRNA catabolic process; P:nuclear-transcribed mRNA catabolic process, exonucleolytic, 3'-5'; P:cell cycle; P:miRNA catabolic process; C:…	EC:3.1.13	SM00955 (SMART); PF00773 (PFAM); PTHR23355:SF9 (PANTHER); PTHR23355 (PANTHER); IPR028591 (HAMAP); IPR012340 (SUPERFAMILY); IPR012340 (SUPERFAMILY); IPR012340 (SUPERFAMILY)
CGI_10024963	neuroguidin isoform X1	825	0.7165	C:membrane
CGI_10000581	transmembrane emp24 domain-containing eca-like	729	0.8225	C:integral component of membrane; P:transport		IPR009038 (SMART); IPR009038 (PFAM); PTHR22811:SF38 (PANTHER); IPR015720 (PANTHER); IPR009038 (PROSITE_PROFILES)
CGI_10020987	lens fiber membrane intrinsic -like [Crassostrea gigas]	414	0.9333	C:integral component of membrane		no IPS match
CGI_10009756	TFG isoform X2	1473	0.7085	C:extracellular exosome; P:signal transduction; P:positive regulation of I-kappaB kinase/NF-kappaB signaling; F:signal transducer activity
CGI_10013440	tctex1 domain-containing 2-like [Lingula anatina]	585	0.635	C:intracellular organelle
CGI_10002041	probable 28S rRNA (cytosine-C(5))-methyltransferase	1956	0.874	F:RNA binding; P:rRNA processing; F:S-adenosylmethionine-dependent methyltransferase activity; P:methylation		IPR023267 (PRINTS); IPR023273 (PRINTS); IPR031341 (PFAM); IPR029063 (G3DSA:3.40.50.GENE3D); IPR001678 (PFAM); IPR011023 (TIGRFAM); PTHR22807:SF30 (PANTHER); PTHR22807 (PANTHER); IPR001678 (PROSITE_PROFILES); IPR029063 (SUPERFAMILY)
CGI_10028193	nuclear pore complex Nup155 [Lepisosteus oculatus]	4581	0.718	P:nuclear envelope organization; P:RNA export from nucleus; F:structural constituent of nuclear pore; P:protein targeting to nucleus; C:nuclear pore
CGI_10023335	glycerol-3-phosphate dehydrogenase [NAD(+)] cytoplasmic-like	1056	0.838	P:carbohydrate metabolic process; F:protein homodimerization activity; C:glycerol-3-phosphate dehydrogenase complex; F:NAD binding; P:glycerol-3-phosphate catabolic process; P:oxidation-reduction process; F:glycerol-3-phosphate dehydrogenase [NAD+] activity	EC:1.1.1.8; EC:1.1.1.94	IPR006168 (PRINTS); IPR006168 (PIRSF); IPR013328 (G3DSA:1.10.1040.GENE3D); IPR016040 (G3DSA:3.40.50.GENE3D); IPR011128 (PFAM); IPR006109 (PFAM); IPR017751 (TIGRFAM); PTHR11728 (PANTHER); PTHR11728:SF10 (PANTHER); IPR008927 (SUPERFAMILY); IPR016040 (SUPERFAMILY)
CGI_10022834	poly [ADP-ribose] polymerase 12-like	2064	0.576	F:metal ion binding
CGI_10013007	PIN2 TERF1-interacting telomerase inhibitor 1	2007	0.6925	F:nucleic acid binding; C:nucleus; P:regulation of cellular process; C:chromosome; C:intracellular organelle part		IPR000467 (SMART); IPR000467 (PFAM); PTHR23149:SF9 (PANTHER); PTHR23149 (PANTHER); IPR000467 (PROSITE_PROFILES)
CGI_10027003	Proteasome subunit beta type-3	486	0.9365	C:nucleus; C:cytoplasm; C:proteasome core complex; F:threonine-type endopeptidase activity; P:proteolysis involved in cellular protein catabolic process	EC:3.4.25
CGI_10001869	interferon-induced 44-like	1410	0.7475	F:GTP binding		IPR006571 (SMART); IPR006073 (PFAM); IPR027417 (G3DSA:3.40.50.GENE3D); IPR006571 (PFAM); PTHR14241 (PANTHER); IPR027417 (SUPERFAMILY)
CGI_10010931	dual oxidase-like [Crassostrea gigas]	4488	0.642	F:peroxidase activity; P:response to oxidative stress; F:calcium ion binding; C:integral component of membrane; P:cellular oxidant detoxification; P:oxidation-reduction process; F:heme binding	EC:1.11.1.7	IPR002048 (SMART); IPR013112 (PFAM); IPR011992 (G3DSA:1.10.238.GENE3D); IPR019791 (PFAM); IPR013121 (PFAM); G3DSA:3.40.50.80 (GENE3D); G3DSA:2.40.30.10 (GENE3D); IPR002048 (PFAM); IPR019791 (G3DSA:1.10.640.GENE3D); IPR013130 (PFAM); PTHR11972:SF5 (PANTHER); PTHR11972 (PANTHER); IPR019791 (PROSITE_PROFILES); IPR017927 (PROSITE_PROFILES); IPR002048 (PROSITE_PROFILES); IPR011992 (SUPERFAMILY); SSF52…
CGI_10012624	DNA-directed RNA polymerase III subunit RPC1	4107	0.85	F:RNA polymerase III activity; F:DNA binding; P:transcription from RNA polymerase III promoter; P:regulation of mitophagy; F:metal ion binding; P:positive regulation of interferon-beta production; P:innate immune response; C:membrane; P:defense response to virus; F:chromatin binding; C:DNA-directed RNA polymerase III complex; P:positive regulation of protein targeting to mitochondrion		IPR006592 (SMART); IPR007080 (PFAM); IPR007081 (PFAM); IPR007083 (PFAM); IPR000722 (PFAM); IPR007066 (PFAM); G3DSA:2.40.40.20 (GENE3D); G3DSA:3.30.1490.180 (GENE3D); PTHR19376 (PANTHER); PTHR19376:SF32 (PANTHER); SSF64484 (SUPERFAMILY)
CGI_10027278	leucine-rich repeat-containing 59	1026	0.858	C:nuclear envelope; C:endoplasmic reticulum membrane; C:integral component of membrane; C:mitochondrial nucleoid; F:poly(A) RNA binding		IPR003591 (SMART); IPR032675 (G3DSA:3.80.10.GENE3D); IPR001611 (PFAM); PTHR23155:SF607 (PANTHER); PTHR23155 (PANTHER); IPR032675 (SUPERFAMILY)
CGI_10022113	translational activator GCN1-like	2193	0.654	C:polysome; C:gap junction; P:regulation of translation; F:protein kinase binding; P:positive regulation of transcription from RNA polymerase II promoter in response to stress; P:regulation of protein kinase activity; F:ribosome binding; P:positive regulation of kinase activity; F:protein kinase regulator activity; P:cellular response to leucine starvation		IPR011989 (G3DSA:1.25.10.GENE3D); IPR000990 (PFAM); IPR026827 (PANTHER); IPR033173 (PTHR23346:PANTHER); IPR016024 (SUPERFAMILY)
CGI_10023346	dolichyl-diphosphooligosaccharide-- glycosyltransferase subunit 1	327	0.71	C:oligosaccharyltransferase complex; F:dolichyl-diphosphooligosaccharide-protein glycotransferase activity; C:integral component of membrane; P:protein N-linked glycosylation via asparagine	EC:2.4.1.119	IPR007676 (PFAM); IPR007676 (PANTHER); PTHR21049:SF0 (PANTHER)
CGI_10022508	testis-expressed sequence 10 isoform X2	2010	0.5545	C:MLL1 complex		IPR024679 (PFAM); IPR011989 (G3DSA:1.25.10.GENE3D); PTHR16056:SF2 (PANTHER); PTHR16056 (PANTHER); IPR016024 (SUPERFAMILY)
CGI_10015969	NHP2 1	513	0.951	F:RNA binding; C:intracellular ribonucleoprotein complex; P:ribosome biogenesis; C:nucleolus		IPR002415 (PRINTS); IPR018492 (PRINTS); IPR004038 (PFAM); IPR029064 (G3DSA:3.30.1330.GENE3D); PTHR23105 (PANTHER); PTHR23105:SF49 (PANTHER); IPR029064 (SUPERFAMILY)
CGI_10005352	hypothetical protein CGI_10005352	1257	0.7683			no IPS match
CGI_10018656	melatonin receptor type 1B-like	1128	0.7065	F:G-protein coupled receptor activity; P:G-protein coupled receptor signaling pathway; C:integral component of membrane
CGI_10013657	copper-transporting ATPase 1-like isoform X1	4629	0.8155	F:nucleotide binding; F:copper ion binding; F:cation-transporting ATPase activity; P:metabolic process; P:cation transmembrane transport; C:integral component of membrane; P:metal ion transport
CGI_10018150	Tripartite motif-containing 45	339	0.817	F:zinc ion binding; C:integral component of membrane; C:intracellular		no IPS match
CGI_10014447	translocating chain-associated membrane 1-like 1	1023	0.7655	P:cotranslational protein targeting to membrane; C:integral component of membrane; C:rough endoplasmic reticulum
CGI_10016208	poly [ADP-ribose] polymerase 14-like	1509	0.7205	F:transferase activity, transferring glycosyl groups; F:organic cyclic compound binding; F:heterocyclic compound binding
CGI_10004161	26S proteasome non-ATPase regulatory subunit 11	195	0.811	C:proteasome complex		PTHR10678 (PANTHER); PTHR10678:SF6 (PANTHER)
CGI_10018455	NSFL1 cofactor p47 isoform X3	786	0.6265	C:intermediate filament cytoskeleton; C:cytoplasm; C:plasma membrane; C:nucleoplasm
CGI_10004060	disulfide-isomerase A5-like	2559	0.753	C:cell; P:metabolic process; P:cell redox homeostasis; F:isomerase activity		PR00421 (PRINTS); IPR005788 (TIGRFAM); IPR012336 (G3DSA:3.40.30.GENE3D); IPR013766 (PFAM); IPR011990 (G3DSA:1.25.40.GENE3D); IPR012336 (G3DSA:3.40.30.GENE3D); IPR012336 (G3DSA:3.40.30.GENE3D); IPR012336 (G3DSA:3.40.30.GENE3D); IPR012336 (G3DSA:3.40.30.GENE3D); PTHR18929 (PANTHER); PTHR18929:SF103 (PANTHER); IPR013766 (PROSITE_PROFILES); IPR013026 (PROSITE_PROFILES); IPR019734 (PROSITE_PROFILES); …
CGI_10015458	phosphoethanolamine N-methyltransferase 3-like isoform X2	1521	0.787	C:cytoplasm; F:S-adenosylmethionine-dependent methyltransferase activity; P:methylation
CGI_10024726	periodic tryptophan 1 homolog	1320	0.634	C:Golgi apparatus; C:nucleolus
CGI_10005518	transcriptional regulator Erg- partial	1293	0.7675	P:cell proliferation; P:signal transduction; F:RNA polymerase II core promoter proximal region sequence-specific DNA binding; P:transcription from RNA polymerase II promoter; P:blood circulation; P:endocardial cushion development; F:chromatin binding; P:endocardial cushion to mesenchymal transition involved in heart valve formation; P:protein phosphorylation; P:positive regulation of transcriptio…
CGI_10013384	UPF0160 mitochondrial	1041	0.833	C:extracellular exosome; P:locomotory exploration behavior; C:mitochondrion; C:nucleoplasm		IPR003226 (PFAM); IPR003226 (PANTHER); PTHR11215:SF1 (PANTHER)
CGI_10026618	Choline transporter 1	1932	0.6	C:integral component of membrane		IPR007603 (PFAM); PTHR12385:SF45 (PANTHER); IPR007603 (PANTHER)
CGI_10024926	activating signal cointegrator 1	1569	0.682	C:nucleus; F:zinc ion binding; P:regulation of transcription, DNA-templated		IPR007374 (SMART); G3DSA:2.30.130.30 (GENE3D); IPR009349 (PFAM); IPR007374 (PFAM); PTHR12963:SF0 (PANTHER); PTHR12963 (PANTHER); IPR015947 (SUPERFAMILY)
CGI_10006321	spermine oxidase-like	1512	0.5325	F:oxidoreductase activity; P:oxidation-reduction process
CGI_10001197	cystatin-A-like [Crassostrea gigas]	351	0.636	F:peptidase inhibitor activity; F:endopeptidase inhibitor activity; F:cysteine-type endopeptidase inhibitor activity; C:membrane; C:integral component of membrane; P:negative regulation of endopeptidase activity; C:intracellular; P:negative regulation of peptidase activity		G3DSA:3.10.450.10 (GENE3D); PTHR11414 (PANTHER); SSF54403 (SUPERFAMILY)
CGI_10014534	Interferon-induced 44	1182	0.932	F:GTP binding
CGI_10004108	Sterol regulatory element-binding 1	2994	0.686	C:integral component of membrane; F:protein dimerization activity
CGI_10027701	26S proteasome non-ATPase regulatory subunit 3	1410	0.8325	P:regulation of catalytic activity; P:regulation of protein catabolic process; P:larval locomotory behavior; C:proteasome complex; P:brain development; P:otic vesicle development; F:enzyme regulator activity		IPR000717 (SMART); SM00753 (SMART); IPR000717 (PFAM); IPR011991 (G3DSA:1.10.10.GENE3D); IPR013586 (PFAM); IPR011990 (G3DSA:1.25.40.GENE3D); PTHR10758 (PANTHER); PTHR10758:SF2 (PANTHER); IPR019734 (PROSITE_PROFILES); IPR013026 (PROSITE_PROFILES); SSF81901 (SUPERFAMILY); IPR011991 (SUPERFAMILY)
CGI_10015865	PREDICTED: uncharacterized protein LOC105332805 [Crassostrea gigas]	384	0.6905	C:membrane; C:integral component of membrane; F:carbohydrate binding		IPR011989 (G3DSA:1.25.10.GENE3D); IPR016024 (SUPERFAMILY)
CGI_10020460	FAM49B-like isoform X1 [Crassostrea gigas]	195	0.9095	P:biological_process; C:extracellular exosome; C:cilium; C:cellular_component; F:molecular_function
CGI_10012605	ATP-dependent RNA helicase DDX54	2229	0.7685	C:nucleus; F:ATP binding; F:RNA binding; C:membrane; P:RNA secondary structure unwinding; F:receptor binding; F:ATP-dependent RNA helicase activity		IPR001650 (SMART); IPR014001 (SMART); IPR011545 (PFAM); IPR027417 (G3DSA:3.40.50.GENE3D); IPR001650 (PFAM); IPR027417 (G3DSA:3.40.50.GENE3D); PTHR24031 (PANTHER); IPR033517 (PTHR24031:PANTHER); PTHR24031 (PANTHER); IPR033517 (PTHR24031:PANTHER); PTHR24031 (PANTHER); PTHR24031 (PANTHER); IPR033517 (PTHR24031:PANTHER); IPR001650 (PROSITE_PROFILES); IPR014014 (PROSITE_PROFILES); IPR014001 (PROSITE_P…
CGI_10009438	chitin synthase	7023	0.7095	C:myosin complex; F:ATP binding; P:metabolic process; C:integral component of membrane; F:chitin synthase activity; F:motor activity	EC:2.4.1.16	IPR001609 (PRINTS); IPR001609 (SMART); PF03142 (PFAM); IPR001609 (PFAM); IPR029044 (G3DSA:3.90.550.GENE3D); PTHR22914:SF8 (PANTHER); IPR004835 (PANTHER); IPR001609 (PROSITE_PROFILES); IPR027417 (SUPERFAMILY); IPR029044 (SUPERFAMILY)
CGI_10027384	Coatomer subunit zeta-1	564	0.907	P:protein transport		IPR022775 (PFAM); G3DSA:3.30.450.60 (GENE3D); PTHR11043 (PANTHER); PTHR11043:SF0 (PANTHER); IPR011012 (SUPERFAMILY)
CGI_10024811	transport Sec31A isoform X2 [Cricetulus griseus]	3636	0.6795
CGI_10000902	nuclear nucleic acid-binding C1D [Nomascus leucogenys]	495	0.754	C:nuclear exosome (RNase complex); F:DNA binding; F:RNA binding; F:protein binding; P:maturation of 5.8S rRNA; P:regulation of transcription, DNA-templated; C:nucleolus; C:nucleoplasm		IPR007146 (PFAM); IPR011082 (PANTHER); PTHR15341:SF4 (PANTHER)
CGI_10023726	eukaryotic translation initiation factor 3 subunit F	831	0.8255	F:thiol-dependent ubiquitin-specific protease activity; P:protein deubiquitination; F:translation initiation factor activity; P:formation of translation preinitiation complex; C:eukaryotic translation initiation factor 3 complex, eIF3m; C:eukaryotic 43S preinitiation complex; C:eukaryotic 48S preinitiation complex; F:translation initiation factor binding; P:regulation of translational initiation		IPR000555 (SMART); IPR000555 (PFAM); IPR024969 (PFAM); PTHR10540:SF6 (PANTHER); PTHR10540 (PANTHER); IPR027531 (HAMAP)
CGI_10025200	SEC23-interacting isoform X2	3102	0.6955	F:metal ion binding
CGI_10012466	alkyldihydroxyacetonephosphate peroxisomal	1863	0.8665	F:oxidoreductase activity, acting on CH-OH group of donors; F:flavin adenine dinucleotide binding; F:alkylglycerone-phosphate synthase activity; P:lipid biosynthetic process; P:oxidation-reduction process	EC:2.5.1.26
CGI_10017084	cell division cycle 123 homolog	1374	0.603	P:cell division; C:cytoplasm; P:cell cycle		IPR009772 (PFAM); PTHR15323 (PANTHER); IPR009772 (PTHR15323:PANTHER)
CGI_10022072	L-2-hydroxyglutarate mitochondrial	1389	0.8145	C:mitochondrion; C:integral component of membrane; P:cellular protein metabolic process; F:2-hydroxyglutarate dehydrogenase activity; P:oxidation-reduction process	EC:1.1.99.2
CGI_10010857	ras-GEF domain-containing family member 1B-like	2040	0.798	P:small GTPase mediated signal transduction; F:guanyl-nucleotide exchange factor activity; C:intracellular; P:positive regulation of GTPase activity
CGI_10027750	Vesicle-trafficking SEC22b	939	0.881	C:endoplasmic reticulum membrane; P:ER to Golgi vesicle-mediated transport; P:protein transport; C:integral component of membrane; F:SNAP receptor activity; C:SNARE complex; C:Golgi membrane; F:SNARE binding; P:exocytosis; C:endoplasmic reticulum-Golgi intermediate compartment membrane; P:vesicle fusion with Golgi apparatus		IPR001388 (PRINTS); IPR010908 (SMART); IPR001388 (G3DSA:1.10.3840.GENE3D); IPR001388 (PFAM); IPR010908 (PFAM); IPR010908 (G3DSA:3.30.450.GENE3D); PTHR21136 (PANTHER); PTHR21136:SF96 (PANTHER); IPR010908 (PROSITE_PROFILES); IPR001388 (PROSITE_PROFILES); SSF58038 (SUPERFAMILY); IPR011012 (SUPERFAMILY)
CGI_10016938	phosphatase 2C-like domain-containing 1 isoform X2	456	0.8808	F:protein serine/threonine phosphatase activity; P:protein dephosphorylation		no IPS match
CGI_10013921	threonylcarbamoyl-AMP synthase-like	1164	0.739	F:nucleotidyltransferase activity; C:cytoplasm; F:double-stranded RNA binding; P:regulation of translational fidelity; C:integral component of membrane; P:tRNA threonylcarbamoyladenosine modification; F:tRNA binding
CGI_10022974	Metallothionein family [Trichomonas vaginalis G3]	2007	0.608	C:collagen trimer; C:integral component of membrane; C:intracellular part; P:protein ubiquitination		IPR016133 (G3DSA:2.160.20.GENE3D); PTHR35577 (PANTHER); PTHR35577:SF1 (PANTHER); IPR016133 (SUPERFAMILY); IPR016133 (SUPERFAMILY); IPR016133 (SUPERFAMILY)
CGI_10014836	FAM98A	1269	0.7185	F:poly(A) RNA binding
CGI_10017205	stomatin mitochondrial	993	0.853	C:membrane
CGI_10010343	ADP-ribosylation factor GTPase-activating 2-like isoform X2	1614	0.8115	F:GTPase activator activity; P:positive regulation of GTPase activity		IPR001164 (PRINTS); IPR001164 (SMART); IPR001164 (PFAM); PTHR23180 (PANTHER); PTHR23180:SF208 (PANTHER); IPR001164 (PROSITE_PROFILES); SSF57863 (SUPERFAMILY)
CGI_10003828	FAM173B [Harpegnathos saltator]	600	0.7085	C:integral component of membrane
CGI_10005601	transmembrane 177-like [Octopus bimaculoides]	2493	0.5435	C:integral component of membrane
CGI_10006412	spliceosome RNA helicase DDX39B isoform X1	1275	0.8355	C:nuclear speck; C:spliceosomal complex; C:transcription export complex; P:cellular response to DNA damage stimulus; C:U6 snRNP; F:ATP-dependent protein binding; P:spliceosomal complex assembly; C:U4 snRNP; F:ATP-dependent RNA helicase activity; F:poly(A) RNA binding; F:ATP binding; F:U6 snRNA binding; C:cytoplasm; P:viral mRNA export from host cell nucleus; P:RNA secondary structure unwinding; P…
CGI_10005111	solute carrier family 26 member 6-like [Lingula anatina]	2346	0.7315	F:secondary active sulfate transmembrane transporter activity; C:integral component of membrane; P:sulfate transmembrane transport		IPR002645 (G3DSA:3.30.750.GENE3D); IPR001902 (TIGRFAM); IPR002645 (PFAM); IPR011547 (PFAM); IPR001902 (PANTHER); IPR002645 (PROSITE_PROFILES); IPR002645 (SUPERFAMILY)
CGI_10014959	ATP synthase subunits region ORF 7	375	0.6975	C:cell; P:UTP biosynthetic process; P:CTP biosynthetic process; P:GTP biosynthetic process; P:nucleoside diphosphate phosphorylation; P:cell adhesion; P:cell redox homeostasis; F:nucleoside diphosphate kinase activity; F:carbohydrate binding	EC:2.7.4.6
CGI_10014051	clustered mitochondria homolog	4062	0.81	F:RNA binding; C:cytoplasm; P:intracellular distribution of mitochondria		IPR011990 (PFAM); IPR033646 (PFAM); IPR007967 (PFAM); IPR028275 (PFAM); PF13424 (PFAM); IPR025697 (PFAM); IPR011990 (G3DSA:1.25.40.GENE3D); PTHR12601 (PANTHER); PTHR12601:SF10 (PANTHER); IPR027523 (HAMAP); IPR011990 (SUPERFAMILY); IPR011990 (SUPERFAMILY); IPR023231 (SUPERFAMILY)
CGI_10018192	catecholamines up	834	0.905	C:cell; F:aspartic-type endopeptidase activity; C:integral component of membrane; F:zinc ion transmembrane transporter activity; P:cellular zinc ion homeostasis; P:protein processing; P:zinc II ion transmembrane transport	EC:3.4.23
CGI_10015445	Chitin synthase 1	417	0.6625	F:transferase activity, transferring hexosyl groups; P:metabolic process; C:integral component of membrane
CGI_10000300	ORF115 [Ostreid herpesvirus 1]	2226	0.62	F:DNA replication origin binding; F:ATP binding; P:DNA replication		IPR003450 (PFAM); IPR027417 (G3DSA:3.40.50.GENE3D); IPR027417 (SUPERFAMILY)
CGI_10017718	transmembrane 208-like	507	0.7405	P:vacuolar protein processing; C:integral component of membrane; C:vacuole
CGI_10003381	elongator complex 2-like	2268	0.682	P:transcription, DNA-templated; C:nucleoplasm part; C:protein complex
CGI_10015296	dual specificity phosphatase 3-like	582	0.7055	F:protein tyrosine phosphatase activity; P:negative regulation of MAPK cascade; P:negative regulation of immune system process; P:peptidyl-tyrosine dephosphorylation; F:protein tyrosine/serine/threonine phosphatase activity	EC:3.1.3.48; EC:3.1.3
CGI_10006535	ubiquilin-1 isoform X1	1731	0.7565			IPR006636 (SMART); IPR000626 (SMART); IPR015940 (SMART); G3DSA:1.10.8.10 (GENE3D); G3DSA:3.10.20.90 (GENE3D); IPR000626 (PFAM); IPR015940 (PFAM); IPR015496 (PANTHER); PTHR10677:SF21 (PANTHER); IPR000626 (PROSITE_PROFILES); IPR015940 (PROSITE_PROFILES); IPR029071 (SUPERFAMILY); IPR009060 (SUPERFAMILY)
CGI_10028272	myeloperoxidase-like [Crassostrea gigas]	2259	0.5815	F:peroxidase activity; P:response to oxidative stress; P:cellular oxidant detoxification; P:oxidation-reduction process; F:heme binding	EC:1.11.1.7	IPR019791 (PRINTS); IPR011042 (G3DSA:2.120.10.GENE3D); IPR019791 (G3DSA:1.10.640.GENE3D); IPR019791 (PFAM); IPR019791 (G3DSA:1.10.640.GENE3D); PTHR11475:SF4 (PANTHER); PTHR11475 (PANTHER); IPR019791 (PROSITE_PROFILES); SSF63829 (SUPERFAMILY); IPR010255 (SUPERFAMILY)
CGI_10014885	UNC5C	1809	0.5755	P:signal transduction; C:integral component of membrane		IPR000906 (SMART); IPR000906 (PFAM); IPR011029 (G3DSA:1.10.533.GENE3D); IPR000488 (PFAM); PTHR12582 (PANTHER); PTHR12582:SF42 (PANTHER); IPR000906 (PROSITE_PROFILES); IPR011029 (SUPERFAMILY)
CGI_10018404	DCN1 3	879	0.7705			IPR005176 (PFAM); IPR014764 (PANTHER); PTHR12281:SF11 (PANTHER); IPR005176 (PROSITE_PROFILES)
CGI_10011702	endoglucanase 13-like	4887	0.722	F:carbohydrate binding; P:cellulose catabolic process; F:cellulase activity	EC:3.2.1.4	IPR012341 (G3DSA:1.50.10.GENE3D); IPR001701 (PFAM); PTHR22298:SF39 (PANTHER); PTHR22298 (PANTHER); IPR008928 (SUPERFAMILY); IPR008928 (SUPERFAMILY)
CGI_10000972	hypothetical protein CGI_10000972	552	1	C:integral component of membrane		no IPS match
CGI_10023890	Tripartite motif-containing 45	1905	0.6025	F:zinc ion binding; C:intracellular
CGI_10020350	eukaryotic translation initiation factor 4E type 2 isoform X3	663	0.8315	F:translation initiation factor activity; C:mRNA cap binding complex; F:ubiquitin protein ligase binding; C:cytoplasm; P:in utero embryonic development; P:translational initiation; P:negative regulation of translation; F:poly(A) RNA binding		IPR001040 (PFAM); IPR023398 (G3DSA:3.30.760.GENE3D); IPR001040 (PANTHER); PTHR11960:SF17 (PANTHER); IPR023398 (SUPERFAMILY)
CGI_10018631	Exonuclease 3 -5 domain-containing 1	927	0.6495	F:nucleic acid binding; F:3'-5' exonuclease activity; P:nucleic acid phosphodiester bond hydrolysis		no IPS match
CGI_10022057	hypothetical protein CGI_10022057	309	0.985	C:integral component of membrane
CGI_10013941	hypothetical protein CGI_10013941	342	1			no IPS match
CGI_10012063	26S proteasome non-ATPase regulatory subunit 1-like	846	0.6425	F:catalytic activity; C:integral component of membrane; C:proteasome complex		PTHR10943 (PANTHER)
CGI_10019552	Fatty acid synthase	8157	0.6175	C:cytoplasm; F:oxidoreductase activity; F:acyl-[acyl-carrier-protein] hydrolase activity; P:oxidation-reduction process; F:phosphopantetheine binding; P:intracellular signal transduction	EC:3.1.2.14	IPR020806 (SMART); IPR020843 (SMART); IPR020801 (SMART); IPR020841 (SMART); IPR003877 (SMART); SM00822 (SMART); IPR014043 (PFAM); IPR016040 (G3DSA:3.40.50.GENE3D); IPR020807 (PFAM); IPR016039 (G3DSA:3.40.47.GENE3D); IPR029058 (G3DSA:3.40.50.GENE3D); IPR029063 (G3DSA:3.40.50.GENE3D); IPR009081 (PFAM); IPR016040 (G3DSA:3.40.50.GENE3D); IPR014030 (PFAM); IPR016039 (G3DSA:3.40.47.GENE3D); IPR003877 (…
CGI_10002147	zinc metallo ase disintegrin VMP-II-like	354	0.81	P:proteolysis; F:metalloendopeptidase activity; F:metallopeptidase activity		no IPS match
CGI_10024516	Zinc finger CCHC domain-containing 8	1773	0.4655	F:binding		PTHR13316 (PANTHER)
CGI_10007403	Nuclear receptor subfamily 0 group B member partial	1407	0.598	C:nucleus; F:DNA binding; P:transcription, DNA-templated; F:steroid hormone receptor activity; P:regulation of transcription, DNA-templated; P:steroid hormone mediated signaling pathway		IPR001723 (PRINTS); IPR000536 (SMART); IPR000536 (G3DSA:1.10.565.GENE3D); IPR000536 (PFAM); PTHR24081:SF8 (PANTHER); PTHR24081 (PANTHER); IPR000536 (SUPERFAMILY)
CGI_10009158	growth arrest and DNA damage-inducible GADD45 gamma-like	528	0.6255	C:nucleus; P:regulation of cell cycle; P:response to stress
CGI_10013074	prenylcysteine oxidase-like	1980	0.6525	P:prenylcysteine catabolic process; F:prenylcysteine oxidase activity; C:membrane; P:oxidation-reduction process	EC:1.8.3.5	IPR023753 (G3DSA:3.50.50.GENE3D); PF13450 (PFAM); IPR010795 (PFAM); IPR017046 (PANTHER); IPR023753 (SUPERFAMILY); SSF51971 (SUPERFAMILY)
CGI_10007323	hypothetical protein CGI_10007323	2106	0.745	P:signal transduction		IPR011029 (G3DSA:1.10.533.GENE3D); IPR000488 (PROSITE_PROFILES); IPR011029 (SUPERFAMILY)
CGI_10026283	FAM210A-like isoform X2	708	0.6335	C:integral component of membrane		IPR009688 (PFAM); PTHR21377 (PANTHER); PTHR21377:SF1 (PANTHER)
CGI_10023337	dolichyl-diphosphooligosaccharide-- glycosyltransferase subunit STT3A	2055	0.928	C:integral component of membrane; P:protein glycosylation; F:oligosaccharyl transferase activity	EC:2.4.1	IPR003674 (PFAM); PTHR13872:SF27 (PANTHER); PTHR13872 (PANTHER)
CGI_10000670	hypothetical protein CGI_10000670	216	0.8125			no IPS match
CGI_10025610	eukaryotic elongation factor 2 kinase-like isoform X2	2079	0.7425	F:ATP binding; F:translation elongation factor activity; F:protein serine/threonine kinase activity; P:protein phosphorylation; P:translational elongation	EC:2.7.11	IPR004166 (SMART); IPR011990 (G3DSA:1.25.40.GENE3D); IPR004166 (PFAM); PTHR14187 (PANTHER); IPR004166 (PROSITE_PROFILES); IPR011009 (SUPERFAMILY); SSF81901 (SUPERFAMILY)
CGI_10008192	von Willebrand factor D and EGF domain-containing	672	0.584	C:membrane; C:integral component of membrane
CGI_10018689	hypothetical protein CGI_10018689	609	0.9333	C:integral component of membrane		no IPS match
CGI_10004709	hypothetical protein CGI_10004709	1617	0.655			PTHR35378 (PANTHER); PS51257 (PROSITE_PROFILES)
CGI_10017709	ubiquitin carboxyl-terminal hydrolase CYLD-like	2892	0.7085	P:protein deubiquitination; F:thiol-dependent ubiquitinyl hydrolase activity	EC:3.4.19.12
CGI_10007060	interferon-related developmental regulator 1-like	1374	0.739	C:nucleus		IPR006921 (PFAM); IPR007701 (PFAM); IPR011989 (G3DSA:1.25.10.GENE3D); PTHR12354 (PANTHER); PTHR12354:SF8 (PANTHER); IPR016024 (SUPERFAMILY)
CGI_10000633	AAEL015064-PB [Aedes aegypti]	285	0.8715	C:nucleus; P:protein sumoylation; F:protein tag		IPR000626 (SMART); IPR022617 (PFAM); G3DSA:3.10.20.90 (GENE3D); PTHR10562 (PANTHER); IPR027218 (PTHR10562:PANTHER); IPR000626 (PROSITE_PROFILES); IPR029071 (SUPERFAMILY)
CGI_10020128	glycine-rich domain-containing 2-like [Biomphalaria glabrata]	2130	0.675			IPR001623 (PRINTS); IPR001623 (SMART); IPR009836 (PFAM); IPR001623 (PFAM); IPR001623 (G3DSA:1.10.287.GENE3D); PTHR34365:SF2 (PANTHER); PTHR34365 (PANTHER); IPR001623 (PROSITE_PROFILES); IPR001623 (SUPERFAMILY)
CGI_10024748	flocculation FLO10-like [Crassostrea gigas]	2112	0.6835	C:viral capsid
CGI_10017635	ribosome production factor 2 homolog	963	0.8385	P:maturation of LSU-rRNA from tricistronic rRNA transcript (SSU-rRNA, 5.8S rRNA, LSU-rRNA); C:nucleolus; F:rRNA binding; P:ribosomal large subunit assembly; F:poly(A) RNA binding
CGI_10007977	hypothetical protein CGI_10007977	348	1			no IPS match
CGI_10020671	adenylate kinase isoenzyme 6-like	543	0.867	F:ATPase activity; F:adenylate kinase activity; F:ATP binding; P:nucleotide phosphorylation; C:Cajal body	EC:2.7.4.3; EC:3.6.1.3	PR01100 (PRINTS); PF13238 (PFAM); IPR027417 (G3DSA:3.40.50.GENE3D); PTHR12595 (PANTHER); PTHR12595:SF0 (PANTHER); IPR020618 (HAMAP); IPR027417 (SUPERFAMILY)
CGI_10007557	hypothetical protein CGI_10007557	666	0.846			no IPS match
CGI_10022083	matrix metallo ase-19-like	1530	0.5375	F:zinc ion binding; P:proteolysis; C:extracellular matrix; F:metalloendopeptidase activity	EC:3.4.24
CGI_10003998	Pancreatic secretory granule membrane major glyco GP2	993	0.656	P:signal transduction; C:integral component of membrane; F:receptor activity; F:signal transducer activity
CGI_10009803	anaphase-promoting complex subunit 5-like	2349	0.598	P:protein K11-linked ubiquitination; F:protein phosphatase binding; P:mitotic cell cycle process; C:anaphase-promoting complex; P:regulation of ubiquitin protein ligase activity; P:ubiquitin-dependent protein catabolic process		IPR011990 (G3DSA:1.25.40.GENE3D); IPR011990 (G3DSA:1.25.40.GENE3D); IPR026000 (PFAM); PTHR12830 (PANTHER); PTHR12830:SF9 (PANTHER); IPR011990 (SUPERFAMILY)
CGI_10023367	Heat shock 70 kDa 14	1338	0.67	F:ATP binding		IPR013126 (PRINTS); G3DSA:3.90.640.10 (GENE3D); IPR013126 (PFAM); G3DSA:3.30.420.40 (GENE3D); G3DSA:3.30.420.40 (GENE3D); G3DSA:3.30.30.30 (GENE3D); IPR029047 (G3DSA:2.60.34.GENE3D); PTHR19375 (PANTHER); SSF53067 (SUPERFAMILY); SSF53067 (SUPERFAMILY)
CGI_10022148	nucleolar complex 2 homolog	1629	0.727	P:negative regulation of transcription from RNA polymerase II promoter; P:negative regulation of histone acetylation; F:repressing transcription factor binding; F:transcription corepressor activity; F:histone binding; C:Noc2p-Noc3p complex; P:ribosomal large subunit biogenesis; C:Noc1p-Noc2p complex; C:nucleolus; C:nucleoplasm
CGI_10004892	GDP-D-glucose phosphorylase 1-like	507	0.66	P:metabolic process; F:GDP-D-glucose phosphorylase activity		PTHR20884:SF8 (PANTHER); IPR026506 (PANTHER)
CGI_10027056	C20orf24 homolog	390	0.7755	C:integral component of membrane
CGI_10013497	Proteasome subunit alpha type-2	708	0.93	C:nucleus; C:cytoplasm; C:proteasome core complex, alpha-subunit complex; F:threonine-type endopeptidase activity; P:ubiquitin-dependent protein catabolic process	EC:3.4.25	IPR000426 (SMART); IPR001353 (PFAM); IPR000426 (PFAM); IPR029055 (G3DSA:3.60.20.GENE3D); PTHR11599 (PANTHER); PTHR11599:SF16 (PANTHER); IPR023332 (PROSITE_PROFILES); IPR029055 (SUPERFAMILY)
CGI_10013581	Radial spoke head 10 B2	2682	0.814	C:gap junction; P:regulation of translation; F:protein kinase binding; P:ion transport; P:regulation of protein kinase activity; P:signal transduction; F:ribosome binding; C:integral component of membrane; P:cellular response to stress; P:positive regulation of kinase activity; P:regulation of apoptotic process; F:protein kinase regulator activity		IPR011029 (G3DSA:1.10.533.GENE3D); IPR011029 (G3DSA:1.10.533.GENE3D); IPR001315 (PFAM); IPR001315 (PROSITE_PROFILES); IPR000488 (PROSITE_PROFILES); IPR011029 (SUPERFAMILY); IPR000157 (SUPERFAMILY); IPR011029 (SUPERFAMILY); IPR011029 (SUPERFAMILY); IPR011029 (SUPERFAMILY)
CGI_10026315	transmembrane 161B-like	1497	0.671	C:integral component of membrane		IPR019395 (PFAM); PTHR13624 (PANTHER)
CGI_10009693	Mitochondrial import receptor subunit TOM70	1764	0.645	C:integral component of membrane		IPR019734 (SMART); IPR011990 (G3DSA:1.25.40.GENE3D); IPR011990 (G3DSA:1.25.40.GENE3D); PF13432 (PFAM); IPR001440 (PFAM); PTHR22904 (PANTHER); PTHR22904:SF34 (PANTHER); IPR019734 (PROSITE_PROFILES); IPR013026 (PROSITE_PROFILES); SSF48439 (SUPERFAMILY)
CGI_10007745	H ACA ribonucleo complex subunit 3	195	0.893	P:pseudouridine synthesis; F:snoRNA binding; C:viral nucleocapsid; C:box H/ACA RNP complex; P:rRNA processing; C:nucleolus; P:primitive hemopoiesis
CGI_10027277	mitochondrial import inner membrane translocase subunit Tim16-like	429	0.7995	C:mitochondrial inner membrane presequence translocase complex; P:embryonic development via the syncytial blastoderm; P:protein import into mitochondrial matrix; P:metabolic process; F:mitochondrial protein-transporting ATPase activity; P:neurogenesis; P:instar larval development	EC:3.6.3.51	PF03656 (PFAM); PTHR12388:SF0 (PANTHER); IPR005341 (PANTHER)
CGI_10012685	Tripartite motif-containing 2	3093	0.8245	F:zinc ion binding; C:intracellular
CGI_10023629	hypothetical protein CGI_10023629	1659	0.657	C:integral component of membrane
CGI_10003845	COBW domain-containing 5	591	0.6855
CGI_10003984	ATP-binding cassette sub-family D member 3 isoform X2	1977	0.8645	F:ATPase activity, coupled to transmembrane movement of substances; F:protein homodimerization activity; P:transmembrane transport; P:peroxisome organization; P:very long-chain fatty acid catabolic process; C:peroxisomal matrix; P:fatty acid biosynthetic process; F:protein self-association; C:mitochondrial inner membrane; F:long-chain fatty acid transporter activity; C:peroxisomal membrane; F:ATP…		IPR003593 (SMART); IPR011527 (PFAM); IPR003439 (PFAM); IPR027417 (G3DSA:3.40.50.GENE3D); IPR005283 (TIGRFAM); IPR031241 (PTHR11384:PANTHER); PTHR11384 (PANTHER); IPR003439 (PROSITE_PROFILES); IPR011527 (PROSITE_PROFILES); IPR011527 (SUPERFAMILY); IPR027417 (SUPERFAMILY)
CGI_10010251	platelet-activating factor acetylhydrolase isoform X1	1341	0.62	F:1-alkyl-2-acetylglycerophosphocholine esterase activity; P:lipid catabolic process	EC:3.1.1.47	IPR016715 (PIRSF); IPR005065 (PFAM); IPR029058 (G3DSA:3.40.50.GENE3D); PTHR10272:SF12 (PANTHER); IPR005065 (PANTHER); IPR029058 (SUPERFAMILY)
CGI_10012206	dolichyl-diphosphooligosaccharide-- glycosyltransferase subunit STT3B	2322	0.8915	C:oligosaccharyltransferase complex; F:dolichyl-diphosphooligosaccharide-protein glycotransferase activity; P:glycoprotein catabolic process; C:integral component of membrane; P:protein N-linked glycosylation via asparagine; P:co-translational protein modification; P:ER-associated ubiquitin-dependent protein catabolic process; P:response to unfolded protein; P:post-translational protein modificat…	EC:2.4.1.119	IPR003674 (PFAM); PTHR13872 (PANTHER); PTHR13872:SF25 (PANTHER)
CGI_10023956	rRNA 2 -O-methyltransferase fibrillarin	942	0.9475	C:box C/D snoRNP complex; C:small-subunit processome; F:rRNA methyltransferase activity; P:box C/D snoRNA 3'-end processing; F:RNA binding; P:histone glutamine methylation; F:histone-glutamine methyltransferase activity; P:tRNA processing; C:Cajal body; P:rRNA methylation	EC:2.1.1	IPR000692 (PRINTS); IPR000692 (SMART); IPR000692 (PIRSF); IPR029063 (G3DSA:3.40.50.GENE3D); IPR000692 (PFAM); G3DSA:3.30.200.20 (GENE3D); PTHR10335 (PANTHER); IPR000692 (HAMAP); IPR029063 (SUPERFAMILY)
CGI_10017270	hypothetical protein CGI_10017270	240	0.8233
CGI_10024733	poly [ADP-ribose] polymerase 14-like	5361	0.522	F:nucleotide binding; F:nucleic acid binding; P:metabolic process; P:regulation of apoptotic process; F:NAD+ ADP-ribosyltransferase activity	EC:2.4.2.30
CGI_10025608	canopy 4	702	0.7385			IPR021852 (PFAM); PTHR15382 (PANTHER)
CGI_10013827	DD3-3-like	2007	0.719	F:DNA binding		PTHR35170 (PANTHER); PTHR35170:SF2 (PANTHER)
CGI_10001711	tumor necrosis factor receptor superfamily member 27-like [Crassostrea gigas]	774	0.6128	P:signal transduction		IPR000488 (SMART); G3DSA:2.10.50.10 (GENE3D); IPR000488 (PFAM); IPR011029 (G3DSA:1.10.533.GENE3D); IPR000488 (PROSITE_PROFILES); IPR011029 (SUPERFAMILY)
CGI_10016755	strawberry notch homolog 1	4731	0.7665	P:regulation of transcription, DNA-templated
CGI_10027695	paired box Pax-6-like isoform X1 [Crassostrea gigas]	1446	0.8055	C:nucleus; P:transcription, DNA-templated; P:multicellular organism development; P:regulation of transcription, DNA-templated; F:sequence-specific DNA binding
CGI_10021989	Proteasome subunit alpha type- partial	495	0.8905	P:Fc-epsilon receptor signaling pathway; C:cytoplasmic mRNA processing body; P:regulation of mRNA stability; P:positive regulation of NF-kappaB transcription factor activity; P:regulation of cellular amino acid metabolic process; C:nucleoplasm; P:stimulatory C-type lectin receptor signaling pathway; C:polysome; P:MAPK cascade; P:antigen processing and presentation of exogenous peptide antigen via…	EC:3.4.25	IPR029055 (G3DSA:3.60.20.GENE3D); IPR001353 (PFAM); PTHR11599 (PANTHER); PTHR11599:SF64 (PANTHER); IPR029055 (SUPERFAMILY)
CGI_10012336	ectodysplasin-A-like isoform X6	603	0.8856	C:integral component of membrane		no IPS match
CGI_10010932	dual oxidase maturation factor 1-like [Lingula anatina]	1365	0.5705	C:endoplasmic reticulum membrane; P:protein transport; C:integral component of membrane; P:response to stimulus; P:learning or memory		IPR018469 (PFAM); PTHR31158 (PANTHER); PTHR31158:SF1 (PANTHER)
CGI_10004061	---NA---	186				IPR007834 (SMART); IPR007834 (PFAM)
CGI_10020480	mitochondrial import inner membrane translocase subunit Tim9-like	186	0.783	F:protein binding; F:metal ion binding; P:chaperone-mediated protein transport; C:mitochondrial intermembrane space protein transporter complex; F:protein transporter activity; P:protein import into mitochondrial inner membrane; C:mitochondrial inner membrane protein insertion complex
CGI_10003650	substance-K receptor-like [Crassostrea gigas]	1200	0.535	F:G-protein coupled receptor activity; P:G-protein coupled receptor signaling pathway; C:integral component of membrane		IPR000276 (PRINTS); G3DSA:1.20.1070.10 (GENE3D); IPR000276 (PFAM); PTHR24242 (PANTHER); IPR017452 (PROSITE_PROFILES); SSF81321 (SUPERFAMILY)
CGI_10012335	ectodysplasin-A-like isoform X4	1407	0.7694	P:immune response; C:membrane; F:tumor necrosis factor receptor binding		IPR008983 (G3DSA:2.60.120.GENE3D); IPR006052 (PFAM); IPR006052 (PROSITE_PROFILES); IPR008983 (SUPERFAMILY); IPR008983 (SUPERFAMILY)
CGI_10025561	ATP-citrate synthase-like isoform X3	3351	0.8795	F:ATP binding; F:ATP citrate synthase activity; C:cytoplasm; F:metal ion binding; F:cofactor binding; P:acetyl-CoA biosynthetic process; P:lipid metabolic process; P:citrate metabolic process	EC:2.3.3.8	IPR014608 (PIRSF); IPR002020 (PFAM); IPR005811 (PFAM); IPR016102 (G3DSA:3.40.50.GENE3D); IPR003781 (PFAM); IPR016143 (G3DSA:1.10.230.GENE3D); IPR016102 (G3DSA:3.40.50.GENE3D); IPR016142 (G3DSA:1.10.580.GENE3D); IPR032263 (PFAM); IPR013650 (PFAM); IPR016040 (G3DSA:3.40.50.GENE3D); IPR013816 (G3DSA:3.30.470.GENE3D); PTHR23118 (PANTHER); IPR016040 (SUPERFAMILY); IPR016102 (SUPERFAMILY); IPR002020 (S…
CGI_10011497	metallo ase inhibitor 2-like	630	0.4955	P:negative regulation of endopeptidase activity; C:extracellular region; F:metalloendopeptidase inhibitor activity
CGI_10013040	E3 ubiquitin- ligase TRIM33	1521	0.5545	F:zinc ion binding; F:metal ion binding; P:metabolic process; F:ligase activity; C:intracellular		IPR013783 (G3DSA:2.60.40.GENE3D); PTHR24103 (PANTHER); IPR017868 (PROSITE_PROFILES); IPR014756 (SUPERFAMILY)
CGI_10014651	ribosome biogenesis BRX1 homolog	915	0.8255	C:nucleolus; P:ribosomal large subunit assembly; F:poly(A) RNA binding
CGI_10001203	copper-transporting ATPase 1-like isoform X1	4305	0.8195	F:nucleotide binding; F:copper ion binding; F:cation-transporting ATPase activity; P:metabolic process; P:cation transmembrane transport; C:integral component of membrane; P:metal ion transport		PR00119 (PRINTS); PR00942 (PRINTS); PF00702 (PFAM); IPR023214 (G3DSA:3.40.50.GENE3D); IPR001757 (TIGRFAM); G3DSA:3.30.70.100 (GENE3D); IPR006121 (PFAM); G3DSA:3.30.70.100 (GENE3D); IPR006122 (TIGRFAM); IPR027256 (TIGRFAM); IPR008250 (G3DSA:2.70.150.GENE3D); IPR008250 (PFAM); G3DSA:3.30.70.100 (GENE3D); IPR023299 (G3DSA:3.40.1110.GENE3D); PTHR24093 (PANTHER); PTHR24093:SF326 (PANTHER); IPR006121 (…
CGI_10002377	exportin-4- partial	1365	0.728	C:cytoplasm; P:protein export from nucleus; F:Ran GTPase binding; C:nuclear pore; F:nuclear export signal receptor activity		PTHR12596 (PANTHER); PTHR12596:SF1 (PANTHER)
CGI_10020126	Terminal uridylyltransferase partial	3507	0.7385	F:RNA uridylyltransferase activity; F:zinc ion binding; P:histone mRNA catabolic process; P:RNA 3'-end processing; F:poly(A) RNA binding	EC:2.7.7.52	IPR001878 (SMART); IPR002058 (PFAM); IPR002934 (PFAM); G3DSA:3.30.460.10 (GENE3D); IPR001878 (G3DSA:4.10.60.GENE3D); IPR001878 (PFAM); PTHR12271:SF58 (PANTHER); PTHR12271 (PANTHER); IPR001878 (PROSITE_PROFILES); SSF81301 (SUPERFAMILY); IPR001878 (SUPERFAMILY); SSF81301 (SUPERFAMILY); SSF81631 (SUPERFAMILY); SSF81631 (SUPERFAMILY)
CGI_10007438	NK-tumor recognition	1497	0.725	F:peptidyl-prolyl cis-trans isomerase activity; P:protein peptidyl-prolyl isomerization; P:protein folding	EC:5.2.1.8
CGI_10023381	ER degradation-enhancing alpha-mannosidase 1	1524	0.8255	F:calcium ion binding; C:membrane; P:metabolic process; F:mannosyl-oligosaccharide 1,2-alpha-mannosidase activity	EC:3.2.1.113	IPR001382 (PRINTS); IPR001382 (G3DSA:1.50.10.GENE3D); IPR001382 (PFAM); PTHR11742 (PANTHER); PTHR11742:SF25 (PANTHER); IPR001382 (SUPERFAMILY)
CGI_10023357	E3 ubiquitin- ligase ARI3 [Crassostrea gigas]	3171	0.5545	F:ubiquitin-protein transferase activity; F:zinc ion binding; F:ligase activity; P:protein ubiquitination		IPR001841 (SMART); IPR002867 (SMART); IPR013083 (G3DSA:3.30.40.GENE3D); IPR002867 (PFAM); IPR031127 (PANTHER); PTHR11685:SF10 (PANTHER); IPR001841 (PROSITE_PROFILES); SSF57850 (SUPERFAMILY); SSF57850 (SUPERFAMILY); SSF57850 (SUPERFAMILY)
CGI_10015124	eukaryotic translation initiation factor 4B- partial	3198	0.68	F:nucleotide binding; F:translation initiation factor activity; C:integral component of membrane; P:translational initiation; P:eukaryotic translation initiation factor 4F complex assembly
CGI_10013332	Ankyrin repeat domain-containing 50	543	0.7105
CGI_10009552	dynein assembly factor axonemal	2487	0.7375
CGI_10011182	Interferon-induced 44	525	0.7485	F:GTP binding		IPR027417 (G3DSA:3.40.50.GENE3D); PTHR14241 (PANTHER)
CGI_10020677	E3 ubiquitin- ligase MIB2	2952	0.5785	F:ubiquitin-protein transferase activity; F:metal ion binding; F:ligase activity; P:protein ubiquitination		IPR002035 (SMART); IPR010606 (PFAM); IPR002035 (G3DSA:3.40.50.GENE3D); IPR004170 (PFAM); IPR002035 (PFAM); PTHR24202:SF4 (PANTHER); PTHR24202 (PANTHER); IPR010606 (PROSITE_PROFILES); IPR004170 (PROSITE_PROFILES); IPR002035 (PROSITE_PROFILES); SSF159034 (SUPERFAMILY); IPR002035 (SUPERFAMILY); SSF117839 (SUPERFAMILY); SSF159034 (SUPERFAMILY)
CGI_10026385	UDP-glucose 4-epimerase-like [Aplysia californica]	1026	0.8235	C:extracellular exosome; F:protein homodimerization activity; F:UDP-glucose 4-epimerase activity; P:galactose catabolic process	EC:5.1.3.2
CGI_10000107	hypothetical protein CGI_10000107	597	0.87	C:integral component of membrane		no IPS match
CGI_10004395	T-complex 1 subunit zeta	1596	0.904	F:ATP binding; C:cytoplasm; F:unfolded protein binding; P:protein folding
CGI_10026716	Complement C1q 4	702	0.6485			IPR001073 (PRINTS); IPR001073 (SMART); IPR008983 (G3DSA:2.60.120.GENE3D); IPR001073 (PFAM); PTHR22923 (PANTHER); PTHR22923:SF54 (PANTHER); IPR001073 (PROSITE_PROFILES); IPR008983 (SUPERFAMILY)
CGI_10007039	proteasome subunit alpha type-6	687	0.9175	P:Fc-epsilon receptor signaling pathway; C:cytoplasmic mRNA processing body; P:regulation of mRNA stability; P:positive regulation of NF-kappaB transcription factor activity; P:regulation of cellular amino acid metabolic process; C:nucleoplasm; P:stimulatory C-type lectin receptor signaling pathway; C:polysome; P:MAPK cascade; P:antigen processing and presentation of exogenous peptide antigen via…	EC:3.4.25	IPR000426 (SMART); IPR001353 (PFAM); IPR029055 (G3DSA:3.60.20.GENE3D); IPR000426 (PFAM); PTHR11599:SF61 (PANTHER); PTHR11599 (PANTHER); IPR023332 (PROSITE_PROFILES); IPR029055 (SUPERFAMILY)
CGI_10010920	synaptosomal-associated 29-like	717	0.606	C:membrane; P:single-organism organelle organization; C:intracellular part		IPR000727 (SMART); G3DSA:1.20.5.110 (GENE3D); G3DSA:1.20.5.110 (GENE3D); PTHR19305:SF9 (PANTHER); PTHR19305 (PANTHER); IPR000727 (PROSITE_PROFILES); SSF58038 (SUPERFAMILY); SSF58038 (SUPERFAMILY)
CGI_10020782	mago nashi homolog	447	0.9575	C:exon-exon junction complex; P:RNA splicing; F:protein binding; C:catalytic step 2 spliceosome; P:nuclear-transcribed mRNA catabolic process, nonsense-mediated decay; C:neuronal cell body; P:mRNA processing; P:mRNA transport; F:poly(A) RNA binding		IPR004023 (G3DSA:3.30.1560.GENE3D); IPR004023 (PFAM); IPR004023 (PANTHER); IPR004023 (SUPERFAMILY)
CGI_10026763	stimulated by retinoic acid gene 6 homolog	492	0.6435	C:integral component of membrane		PF14752 (PFAM); PTHR21444 (PANTHER); PTHR21444:SF15 (PANTHER)
CGI_10000793	hypothetical protein CGI_10000793	1185	0.5727			no IPS match
CGI_10020442	Exosome complex exonuclease RRP44	2832	0.795	C:cytoplasmic exosome (RNase complex); C:nuclear exosome (RNase complex); P:nucleic acid phosphodiester bond hydrolysis; F:3'-5'-exoribonuclease activity; F:endonuclease activity; P:rRNA catabolic process; P:rRNA processing; P:mRNA catabolic process	EC:3.1.13	SM00955 (SMART); IPR002716 (SMART); IPR002716 (PFAM); PF00773 (PFAM); IPR029060 (G3DSA:3.40.50.GENE3D); PTHR23355:SF35 (PANTHER); PTHR23355 (PANTHER); IPR012340 (SUPERFAMILY); IPR012340 (SUPERFAMILY); IPR029060 (SUPERFAMILY); IPR012340 (SUPERFAMILY)
CGI_10014746	Glutathione S-transferase C-terminal domain-containing	2067	0.5745	P:metabolic process; F:transferase activity
CGI_10012182	hypothetical protein CGI_10012182	2211	0.625	P:signal transduction
CGI_10006085	Tripartite motif-containing 3	258	0.73	F:zinc ion binding; C:intracellular
CGI_10010842	ubiquitin-like modifier-activating enzyme 1	1074	0.821	C:nucleus; F:ubiquitin-protein transferase activity; F:ATP binding; C:membrane; C:cytosol; F:ubiquitin activating enzyme activity; P:modification-dependent protein catabolic process; P:protein ubiquitination		IPR018965 (SMART); IPR019572 (G3DSA:1.10.3240.GENE3D); IPR019572 (PFAM); IPR016040 (G3DSA:3.40.50.GENE3D); IPR018965 (PFAM); IPR000594 (PFAM); PTHR10953 (PANTHER); PTHR10953:SF144 (PANTHER); PTHR10953 (PANTHER); IPR000594 (SUPERFAMILY); IPR000594 (SUPERFAMILY)
CGI_10006979	nucleolar and coiled-body phospho 1-like isoform X3	1023	0.8635
CGI_10014536	Interferon-induced 44	714	0.8805	F:GTP binding
CGI_10008407	Tripartite motif-containing 2	1284	0.479	F:zinc ion binding; F:metal ion binding; C:intracellular
CGI_10006759	retinoic acid receptor gamma-like isoform X1 [Crassostrea gigas]	1536	0.6405	C:nucleus; F:transcription factor activity, sequence-specific DNA binding; F:zinc ion binding; P:transcription, DNA-templated; F:steroid hormone receptor activity; P:regulation of transcription, DNA-templated; F:sequence-specific DNA binding; P:steroid hormone mediated signaling pathway
CGI_10016164	BTB POZ domain-containing 2-like [Crassostrea gigas]	1299	0.5115
CGI_10025938	superkiller viralicidic activity 2-like 2	3078	0.857	F:ATP binding; F:protein binding; P:maturation of 5.8S rRNA; C:catalytic step 2 spliceosome; F:RNA helicase activity; C:nucleolus; C:exosome (RNase complex); C:nucleoplasm; F:poly(A) RNA binding; P:mRNA splicing, via spliceosome; P:RNA catabolic process	EC:2.7.7	IPR016438 (PIRSF); IPR014001 (SMART); IPR001650 (SMART); IPR012961 (SMART); IPR025696 (PFAM); IPR001650 (PFAM); IPR027417 (G3DSA:3.40.50.GENE3D); IPR011545 (PFAM); IPR012961 (PFAM); IPR027417 (G3DSA:3.40.50.GENE3D); IPR001650 (PROSITE_PROFILES); IPR014001 (PROSITE_PROFILES); IPR027417 (SUPERFAMILY)
CGI_10024527	HGH1 homolog	1275	0.6815			IPR007205 (PFAM); IPR007206 (PFAM); IPR011989 (G3DSA:1.25.10.GENE3D); PTHR13387 (PANTHER); IPR016024 (SUPERFAMILY)
CGI_10020282	ubiquitin carboxyl-terminal hydrolase 25-like	1170	0.6725	P:protein deubiquitination; F:thiol-dependent ubiquitinyl hydrolase activity; P:ubiquitin-dependent protein catabolic process	EC:3.4.19.12
CGI_10011125	stress-induced-phospho 1	1695	0.713	C:myelin sheath; F:poly(A) RNA binding
CGI_10010821	Ribosome biogenesis bop1	3039	0.8095	P:maturation of LSU-rRNA from tricistronic rRNA transcript (SSU-rRNA, 5.8S rRNA, LSU-rRNA); F:ribonucleoprotein complex binding; C:PeBoW complex; P:regulation of cell cycle; P:maturation of 5.8S rRNA from tricistronic rRNA transcript (SSU-rRNA, 5.8S rRNA, LSU-rRNA); C:nucleoplasm; C:preribosome, large subunit precursor
CGI_10008100	ribosomal RNA-processing 14-C-like isoform X2 [Biomphalaria glabrata]	1380	0.767	F:RNA binding; F:structural constituent of ribosome; C:ribosome; P:translation
CGI_10017004	Cleavage and polyadenylation specificity factor subunit 3	2061	0.8655	F:5'-3' exonuclease activity; P:RNA phosphodiester bond hydrolysis, endonucleolytic; F:RNA binding; C:mRNA cleavage and polyadenylation specificity factor complex; F:metal ion binding; P:mRNA 3'-end processing by stem-loop binding and cleavage; F:endoribonuclease activity		IPR021718 (SMART); IPR001279 (SMART); IPR022712 (SMART); IPR011108 (PFAM); IPR001279 (G3DSA:3.60.15.GENE3D); IPR022712 (PFAM); IPR021718 (PFAM); IPR001279 (PFAM); PTHR11203:SF11 (PANTHER); PTHR11203 (PANTHER); IPR001279 (SUPERFAMILY)
CGI_10019402	U3 small nucleolar ribonucleo MPP10	2103	0.7145	C:small-subunit processome; P:maturation of SSU-rRNA; C:Mpp10 complex; C:small nucleolar ribonucleoprotein complex
CGI_10011157	Appr-1-p processing	1107	0.5835	F:transferase activity		IPR002589 (SMART); G3DSA:3.40.220.10 (GENE3D); IPR002589 (PFAM); PTHR11106 (PANTHER); IPR002589 (PROSITE_PROFILES); SSF52949 (SUPERFAMILY)
CGI_10022729	Actin-5C [Trichinella pseudospiralis]	1131	0.9905	F:ATP binding		IPR004000 (PRINTS); IPR004000 (SMART); G3DSA:3.30.420.40 (GENE3D); G3DSA:3.30.420.40 (GENE3D); G3DSA:3.90.640.10 (GENE3D); IPR004000 (PFAM); PTHR11937:SF244 (PANTHER); IPR004000 (PANTHER); SSF53067 (SUPERFAMILY); SSF53067 (SUPERFAMILY)
CGI_10025920	MAM and LDL-receptor class A domain-containing 1-like	1926	0.576	F:zinc ion binding; P:proteolysis; F:metalloendopeptidase activity	EC:3.4.24	IPR001506 (PRINTS); IPR000859 (SMART); IPR006026 (SMART); IPR000859 (G3DSA:2.60.120.GENE3D); IPR001506 (PFAM); G3DSA:2.10.25.10 (GENE3D); IPR000859 (PFAM); IPR024079 (G3DSA:3.40.390.GENE3D); PTHR10127 (PANTHER); IPR000859 (PROSITE_PROFILES); IPR000742 (PROSITE_PROFILES); IPR000859 (SUPERFAMILY); SSF57196 (SUPERFAMILY); SSF55486 (SUPERFAMILY)
CGI_10014647	exosome complex component RRP40-like	711	0.7775	P:nucleic acid phosphodiester bond hydrolysis; F:RNA binding; F:exonuclease activity; C:exosome (RNase complex)
CGI_10004343	Tripartite motif-containing 45	1194	0.5875	F:zinc ion binding; C:intracellular		IPR011042 (G3DSA:2.120.10.GENE3D); SSF101898 (SUPERFAMILY)
CGI_10024571	poly [ADP-ribose] polymerase 15-like [Crassostrea gigas]	1782	0.6215	P:metabolic process; F:NAD+ ADP-ribosyltransferase activity	EC:2.4.2.30	G3DSA:3.40.220.10 (GENE3D); IPR012317 (PFAM); IPR002589 (PFAM); IPR012317 (G3DSA:3.90.228.GENE3D); PTHR14453:SF50 (PANTHER); PTHR14453 (PANTHER); IPR002589 (PROSITE_PROFILES); IPR012317 (PROSITE_PROFILES); SSF56399 (SUPERFAMILY); SSF52949 (SUPERFAMILY)
CGI_10026623	ATP-dependent RNA helicase DDX55	1761	0.7785	F:ATP binding; C:membrane; P:RNA secondary structure unwinding; F:ATP-dependent RNA helicase activity; F:poly(A) RNA binding		IPR025313 (SMART); IPR001650 (SMART); IPR014001 (SMART); IPR025313 (PFAM); IPR011545 (PFAM); IPR001650 (PFAM); IPR027417 (G3DSA:3.40.50.GENE3D); IPR027417 (G3DSA:3.40.50.GENE3D); PTHR24031:SF2 (PANTHER); PTHR24031 (PANTHER); IPR014014 (PROSITE_PROFILES); IPR001650 (PROSITE_PROFILES); IPR014001 (PROSITE_PROFILES); IPR027417 (SUPERFAMILY)
CGI_10006204	hypothetical protein CGI_10006204	780	0.915
CGI_10006497	hypothetical protein CGI_10006497	315	1	C:integral component of membrane		no IPS match
CGI_10020915	H ACA ribonucleo complex non-core subunit NAF1	1578	0.7415	P:pseudouridine synthesis; C:intracellular ribonucleoprotein complex; C:viral nucleocapsid; P:ribosome biogenesis		IPR007504 (PFAM); G3DSA:2.40.10.230 (GENE3D); PTHR31633 (PANTHER); IPR009000 (SUPERFAMILY)
CGI_10025560	PREDICTED: uncharacterized protein LOC105335900 [Crassostrea gigas]	528	0.6113			no IPS match
CGI_10027624	Dual specificity kinase shkC	279	0.7757	P:phosphorylation; F:kinase activity
CGI_10014872	Elongator complex 1	4554	0.695	P:regulation of protein kinase activity; C:transcription elongation factor complex; P:G-protein coupled receptor signaling pathway; P:protein complex assembly; C:nucleolus; P:protein phosphorylation; F:RNA polymerase II core binding; C:histone acetyltransferase complex; P:regulation of transcription from RNA polymerase II promoter; P:transcription elongation from RNA polymerase II promoter; F:pho…	EC:2.7.1	IPR006849 (PFAM); G3DSA:1.20.1070.10 (GENE3D); IPR015943 (G3DSA:2.130.10.GENE3D); IPR000276 (PFAM); IPR015943 (G3DSA:2.130.10.GENE3D); IPR006849 (PANTHER); IPR017452 (PROSITE_PROFILES); IPR017986 (SUPERFAMILY); SSF81321 (SUPERFAMILY); SSF69322 (SUPERFAMILY)
CGI_10021623	hypothetical protein CGI_10021623	660	1			no IPS match
CGI_10026720	Translocon-associated subunit beta	3855	0.7765	C:endoplasmic reticulum membrane; F:RNA-directed RNA polymerase activity; P:transcription, RNA-templated; C:integral component of membrane	EC:2.7.7.48	PF05753 (PFAM); IPR007855 (PFAM); IPR007855 (PANTHER); PTHR23079:SF1 (PANTHER)
CGI_10020287	cholesterol 7-desaturase-like	1149	0.764	F:oxidoreductase activity; F:metal ion binding; C:integral component of membrane; P:oxidation-reduction process; F:2 iron, 2 sulfur cluster binding
CGI_10002565	LLP homolog	363	0.631	P:long-term memory; C:cytoplasm; P:positive regulation of transcription, DNA-templated; C:nucleolus
CGI_10012120	Amiloride-sensitive cation channel 4-B	2037	0.551	F:sodium channel activity; C:integral component of membrane; P:sodium ion transmembrane transport
CGI_10014965	mRNA turnover 4 homolog	1008	0.8275	F:structural constituent of ribosome; P:cytoplasmic translation; P:nuclear-transcribed mRNA catabolic process; C:cytosolic large ribosomal subunit; P:rRNA processing; C:nucleolus; F:large ribosomal subunit rRNA binding; P:ribosomal large subunit assembly; C:preribosome, large subunit precursor
CGI_10008993	hypothetical protein CGI_10008993	402	0.8538	F:chitin binding; P:chitin metabolic process; C:integral component of membrane; C:extracellular region
CGI_10026274	26S protease regulatory subunit 6A-B	1287	0.942	F:ATP binding; C:proteasome regulatory particle, base subcomplex; C:cytosolic proteasome complex; C:nuclear proteasome complex; F:peptidase activity; F:TBP-class protein binding; P:ER-associated ubiquitin-dependent protein catabolic process; P:positive regulation of proteasomal protein catabolic process; F:proteasome-activating ATPase activity; P:positive regulation of RNA polymerase II transcrip…		IPR003593 (SMART); IPR027417 (G3DSA:3.40.50.GENE3D); IPR005937 (TIGRFAM); IPR003959 (PFAM); G3DSA:1.10.8.60 (GENE3D); PTHR23073:SF7 (PANTHER); PTHR23073 (PANTHER); IPR027417 (SUPERFAMILY)
CGI_10009621	Poly [ADP-ribose] polymerase 12	3192	0.6195	P:metabolic process; F:NAD+ ADP-ribosyltransferase activity	EC:2.4.2.30
CGI_10005650	ras-related Rab-11A-like	705	0.824	P:oocyte microtubule cytoskeleton polarization; P:negative regulation of synaptic growth at neuromuscular junction; P:border follicle cell migration; C:neuronal cell body; C:fusome; P:intracellular protein transport; P:cortical actin cytoskeleton organization; P:centrosome localization; P:nucleocytoplasmic transport; C:terminal bouton; F:GTPase activity; P:Kupffer's vesicle development; F:protein…
CGI_10018625	aquaporin-8-like isoform X1	717	0.6265	C:integral component of membrane; P:single-organism transport; F:transporter activity		IPR000425 (PRINTS); IPR023271 (G3DSA:1.20.1080.GENE3D); IPR000425 (PFAM); PTHR19139:SF178 (PANTHER); IPR000425 (PANTHER); IPR023271 (SUPERFAMILY)
CGI_10010778	adenosine monophosphate- transferase FICD	1356	0.768	F:nucleotide binding; C:integral component of membrane; F:protein adenylyltransferase activity; P:protein adenylylation
CGI_10024667	3-hydroxy-3-methylglutaryl-coenzyme A reductase	2781	0.742	C:endoplasmic reticulum membrane; F:NADP binding; C:integral component of membrane; P:coenzyme A metabolic process; P:oxidation-reduction process; P:isoprenoid biosynthetic process; F:hydroxymethylglutaryl-CoA reductase (NADPH) activity	EC:1.1.1.34
CGI_10003491	Actin-5C [Trichinella pseudospiralis]	1131	0.9905	F:ATP binding		IPR004000 (PRINTS); IPR004000 (SMART); IPR004000 (PFAM); G3DSA:3.30.420.40 (GENE3D); G3DSA:3.30.420.40 (GENE3D); G3DSA:3.90.640.10 (GENE3D); IPR004000 (PANTHER); PTHR11937:SF244 (PANTHER); SSF53067 (SUPERFAMILY); SSF53067 (SUPERFAMILY)
CGI_10024064	rho-related racA-like	1182	0.7415	F:GTP binding; P:small GTPase mediated signal transduction; C:membrane; P:protein transport; C:intracellular
CGI_10006945	GDP-D-glucose phosphorylase 1-like	735	0.675	P:metabolic process; F:GDP-D-glucose phosphorylase activity
CGI_10015697	Nucleolar 8	1539	0.539	F:nucleotide binding; F:nucleic acid binding; C:nucleus; P:positive regulation of cell growth; C:cytoplasm; P:DNA replication; P:rRNA processing; C:nucleolus; F:poly(A) RNA binding
CGI_10003844	hypothetical protein CGI_10003844	534	0.6938
CGI_10005641	stimulator of interferon genes -like isoform X3 [Crassostrea gigas]	540	0.6165	P:signal transduction
CGI_10024456	Neuronal acetylcholine receptor subunit alpha-6 [Crassostrea gigas]	1242	0.634	P:ion transmembrane transport; C:integral component of membrane; F:extracellular ligand-gated ion channel activity		IPR006201 (PRINTS); IPR006202 (G3DSA:2.70.170.GENE3D); IPR006029 (PFAM); IPR027361 (G3DSA:1.20.120.GENE3D); IPR006202 (PFAM); IPR006201 (PANTHER); IPR006202 (SUPERFAMILY); IPR006029 (SUPERFAMILY)
CGI_10021844	AGAP009899-PA [Anopheles gambiae PEST]	3012	0.833	F:nucleic acid binding; F:metal ion binding		IPR015880 (SMART); IPR007087 (PFAM); IPR013087 (G3DSA:3.30.160.GENE3D); IPR013087 (G3DSA:3.30.160.GENE3D); IPR007087 (PFAM); IPR013087 (G3DSA:3.30.160.GENE3D); PTHR24409 (PANTHER); IPR007087 (PROSITE_PROFILES); SSF57667 (SUPERFAMILY); SSF57667 (SUPERFAMILY); SSF57667 (SUPERFAMILY)
CGI_10011300	trace amine-associated receptor 1	1230	0.6338	F:G-protein coupled receptor activity; P:G-protein coupled receptor signaling pathway; C:integral component of membrane		IPR000276 (PRINTS); G3DSA:1.20.1070.10 (GENE3D); IPR000276 (PFAM); IPR017452 (PROSITE_PROFILES); SSF81321 (SUPERFAMILY)
CGI_10022450	E3 ubiquitin- ligase HECTD1	3102	0.5835	F:ubiquitin-protein transferase activity; F:metal ion binding; F:ligase activity; P:protein ubiquitination
CGI_10020341	polymerase delta-interacting 3-like	1110	0.632	F:nucleotide binding; F:nucleic acid binding
CGI_10006768	Smaug homolog 1-like [Lingula anatina]	2091	0.5425	F:RNA binding; P:regulation of transcription, DNA-templated		IPR001660 (SMART); IPR001660 (PFAM); IPR013761 (G3DSA:1.10.150.GENE3D); IPR015327 (G3DSA:1.25.40.GENE3D); PTHR12515 (PANTHER); IPR013761 (SUPERFAMILY)
CGI_10006375	dnaJ homolog subfamily C member 2-like	1599	0.8205	P:chromatin modification; P:transcription, DNA-templated; P:DNA replication; F:chromatin binding; F:poly(A) RNA binding; F:DNA binding; C:nuclear membrane; F:ubiquitin binding; F:histone binding; P:negative regulation of cell growth; P:positive regulation of transcription, DNA-templated; C:cytosol; F:Hsp70 protein binding; P:negative regulation of DNA biosynthetic process		IPR001005 (SMART); IPR001623 (G3DSA:1.10.287.GENE3D); IPR001623 (PFAM); IPR009057 (G3DSA:1.10.10.GENE3D); IPR001005 (PFAM); IPR032003 (PFAM); PTHR24078 (PANTHER); PTHR24078:SF193 (PANTHER); IPR001623 (PROSITE_PROFILES); IPR017877 (PROSITE_PROFILES); IPR001623 (SUPERFAMILY); IPR009057 (SUPERFAMILY); IPR009057 (SUPERFAMILY)
CGI_10003697	dynamin-1 isoform X3	2067	0.8265	P:heart contraction; P:regulation of mitophagy; C:Golgi apparatus; P:dynamin polymerization involved in mitochondrial fission; C:microtubule; F:GTP binding; P:protein homotetramerization; C:brush border; P:mitochondrion morphogenesis; P:necroptotic process; P:protein localization to mitochondrion; F:GTPase activity; C:cytosol; P:positive regulation of protein secretion; P:positive regulation of i…
CGI_10003408	sialomucin core 24-like isoform X1	687	0.77			no IPS match
CGI_10021628	heat shock 70 kDa 12A-like [Crassostrea gigas]	1746	0.6605			IPR029047 (G3DSA:2.60.34.GENE3D); IPR013126 (PFAM); G3DSA:3.30.420.40 (GENE3D); G3DSA:3.30.420.40 (GENE3D); PTHR14187 (PANTHER); PTHR14187:SF47 (PANTHER); SSF53067 (SUPERFAMILY); SSF53067 (SUPERFAMILY)
CGI_10003079	stimulator of interferon genes	1065	0.5635	F:protein binding; P:activation of innate immune response; C:intracellular membrane-bounded organelle; P:positive regulation of type I interferon production; C:cytoplasmic part		IPR029158 (PFAM); PTHR34339 (PANTHER); PTHR34339:SF1 (PANTHER)
CGI_10014460	DNA-directed RNA polymerase I subunit RPA1	5058	0.681	C:nucleus; F:DNA binding; F:zinc ion binding; F:DNA-directed RNA polymerase activity; P:transcription, DNA-templated	EC:2.7.7.6
CGI_10000954	2,4-dienoyl- mitochondrial	1020	0.8155			IPR002347 (PRINTS); PF13561 (PFAM); IPR016040 (G3DSA:3.40.50.GENE3D); PTHR24322:SF426 (PANTHER); IPR002347 (PANTHER); IPR016040 (SUPERFAMILY)
CGI_10026290	mitochondrial intermembrane space import and assembly 40	486	0.6175			PTHR21622 (PANTHER)
CGI_10021689	heat shock 70 kDa 12A-like	1629	0.567	C:membrane; C:integral component of membrane		IPR013126 (PFAM); G3DSA:3.30.420.40 (GENE3D); G3DSA:3.30.420.40 (GENE3D); PTHR14187:SF47 (PANTHER); PTHR14187 (PANTHER); SSF53067 (SUPERFAMILY); SSF53067 (SUPERFAMILY)
CGI_10015016	FMRFamide receptor-like [Crassostrea gigas]	1125	0.6065	F:G-protein coupled receptor activity; P:G-protein coupled receptor signaling pathway; C:integral component of membrane
CGI_10008854	proteasome inhibitor PI31 subunit	834	0.6155	C:proteasome complex		IPR021625 (PFAM); IPR013886 (PFAM); PTHR13266 (PANTHER)
CGI_10009531	endoplasmic reticulum-Golgi intermediate compartment 1	873	0.8205	P:ER to Golgi vesicle-mediated transport; C:integral component of membrane; C:endoplasmic reticulum-Golgi intermediate compartment		PF13850 (PFAM); IPR012936 (PFAM); PTHR10984 (PANTHER); PTHR10984:SF36 (PANTHER)
CGI_10026027	hypothetical protein CGI_10026027	1479	0.916			no IPS match
CGI_10000870	transcriptional regulator	417	0.6565	F:methyltransferase activity; F:transferase activity; P:methylation		IPR011991 (G3DSA:1.10.10.GENE3D); IPR011991 (SUPERFAMILY)
CGI_10009152	PREDICTED: uncharacterized protein LOC105327448 [Crassostrea gigas]	1230	0.815	P:regulation of apoptotic process
CGI_10017535	dnaJ homolog subfamily C member 25 homolog	1056	0.7625	C:integral component of membrane		IPR001623 (PRINTS); IPR001623 (SMART); IPR001623 (G3DSA:1.10.287.GENE3D); IPR001623 (PFAM); PTHR24078 (PANTHER); PTHR24078:SF284 (PANTHER); IPR001623 (PROSITE_PROFILES); IPR001623 (SUPERFAMILY)
CGI_10011554	Calcyclin-binding	675	0.6915			IPR008978 (G3DSA:2.60.40.GENE3D); IPR015120 (PFAM); IPR007052 (PFAM); PTHR13164 (PANTHER); IPR007052 (PROSITE_PROFILES); IPR007699 (PROSITE_PROFILES); SSF140106 (SUPERFAMILY); IPR008978 (SUPERFAMILY)
CGI_10004722	Ras-related Rab-1A	420	0.77	P:single-organism cellular localization; P:small GTPase mediated signal transduction; P:metabolic process; P:cellular component assembly; C:Golgi apparatus; P:intracellular protein transport; P:organelle organization; F:GTP binding; P:nucleocytoplasmic transport; P:ER to Golgi vesicle-mediated transport; P:movement of cell or subcellular component; P:establishment of vesicle localization; F:GTPas…		PR00449 (PRINTS); SM00175 (SMART); SM00173 (SMART); SM00174 (SMART); IPR001806 (PFAM); IPR027417 (G3DSA:3.40.50.GENE3D); IPR005225 (TIGRFAM); PTHR24073 (PANTHER); PS51419 (PROSITE_PROFILES); IPR027417 (SUPERFAMILY)
CGI_10002616	fibropellin-1- partial	1161	0.7335	F:calcium ion binding; C:integral component of membrane
CGI_10008211	ubiquitin carboxyl-terminal hydrolase 16-like	3147	0.6315	P:protein deubiquitination; F:zinc ion binding; F:thiol-dependent ubiquitinyl hydrolase activity	EC:3.4.19.12	IPR013083 (G3DSA:3.30.40.GENE3D); IPR001607 (PFAM); IPR001394 (PFAM); PTHR24006 (PANTHER); PTHR24006:SF451 (PANTHER); IPR028889 (PROSITE_PROFILES); IPR001607 (PROSITE_PROFILES); SSF57850 (SUPERFAMILY); SSF54001 (SUPERFAMILY)
CGI_10000429	hypothetical protein CGI_10000429	186	1			no IPS match
CGI_10023794	dioxygenase Mb0100 [Halyomorpha halys]	507	0.753	F:oxidoreductase activity; P:oxidation-reduction process		G3DSA:3.60.130.10 (GENE3D); IPR003819 (PFAM); PTHR30468 (PANTHER); SSF51197 (SUPERFAMILY)
CGI_10003021	fragile X mental retardation syndrome-related 1-like isoform X2	1212	0.817	F:RNA binding
CGI_10005207	sarcoplasmic reticulum histidine-rich calcium-binding -like	360	0.7105	P:regulation of release of sequestered calcium ion into cytosol; P:calcium ion homeostasis; C:sarcoplasmic reticulum; P:positive regulation of multicellular organismal process; P:regulation of heart contraction; C:organelle part; P:single-organism cellular process; F:binding		IPR015666 (PANTHER)
CGI_10028179	Proteasome maturation	243	0.7775	C:nucleus; C:cytoplasm; C:proteasome complex; P:proteasome assembly
CGI_10010471	ribosome production factor 2 homolog	828	0.847	P:maturation of LSU-rRNA from tricistronic rRNA transcript (SSU-rRNA, 5.8S rRNA, LSU-rRNA); C:nucleolus; F:rRNA binding; P:ribosomal large subunit assembly		IPR007109 (SMART); IPR007109 (PFAM); PTHR12728:SF0 (PANTHER); PTHR12728 (PANTHER); IPR007109 (PROSITE_PROFILES)
CGI_10006526	tRNA (guanine(26)-N(2))-dimethyltransferase-like	1533	0.7045	F:RNA binding; F:tRNA (guanine-N2-)-methyltransferase activity; P:tRNA methylation	EC:2.1.1
CGI_10010964	tRNA (cytidine(32) guanosine(34)-2 -O)-methyltransferase	1047	0.896	P:tRNA nucleoside ribose methylation; C:cytoplasm; F:tRNA methyltransferase activity; P:cytoplasmic translation	EC:2.1.1
CGI_10014022	microfibril-associated glyco 4-like	888	0.762	C:integral component of membrane; F:binding
CGI_10022687	Ubiquitin-like modifier-activating enzyme 1	528	0.9425	F:ATP binding; C:integral component of membrane; P:cellular protein modification process; F:small protein activating enzyme activity		IPR018965 (SMART); IPR016040 (G3DSA:3.40.50.GENE3D); IPR018965 (PFAM); IPR000594 (PFAM); PTHR10953:SF144 (PANTHER); PTHR10953 (PANTHER); IPR000594 (SUPERFAMILY)
CGI_10010191	serine threonine- kinase Nek4-like	3177	0.7695	F:ATP binding; P:peptidyl-tyrosine phosphorylation; F:protein tyrosine kinase activity; C:cytoplasm; C:integral component of membrane; P:single-organism cellular process; F:protein serine/threonine kinase activity; P:single-organism metabolic process	EC:2.7.10; EC:2.7.11
CGI_10010237	PREDICTED: uncharacterized protein C19orf52-like [Crassostrea gigas]	600	0.6375
CGI_10011465	WD repeat-containing 3	2793	0.7705	C:small-subunit processome; P:maturation of SSU-rRNA from tricistronic rRNA transcript (SSU-rRNA, 5.8S rRNA, LSU-rRNA); C:nuclear membrane; F:snoRNA binding; C:Pwp2p-containing subcomplex of 90S preribosome; C:nucleoplasm; F:poly(A) RNA binding
CGI_10022606	Toll-like receptor 6	864	0.6053	P:signal transduction; P:metabolic process; C:membrane; P:proteolysis; C:integral component of membrane; F:N-acetyltransferase activity; F:metallopeptidase activity		no IPS match
CGI_10024230	C1q-domain-containing partial	735	0.6535	C:membrane; C:integral component of membrane; F:carbohydrate binding
CGI_10000165	Interleukin-1 receptor-associated kinase 4	597	0.7355	F:ATP binding; F:protein serine/threonine kinase activity; P:protein phosphorylation	EC:2.7.11	IPR000719 (SMART); G3DSA:1.10.510.10 (GENE3D); IPR000719 (PFAM); PTHR24419 (PANTHER); PTHR24419:SF22 (PANTHER); IPR000719 (PROSITE_PROFILES); IPR011009 (SUPERFAMILY)
CGI_10005625	cell growth-regulating nucleolar -like isoform X1 [Limulus polyphemus]	1053	0.7325
CGI_10024342	AP-1 complex subunit beta-1 isoform X1 [Trichogramma pretiosum]	2796	0.8635	P:vesicle-mediated transport; C:clathrin adaptor complex; F:protein transporter activity; P:intracellular protein transport
CGI_10022970	stimulator of interferon genes -like isoform X3 [Crassostrea gigas]	2061	0.5325	P:activation of innate immune response; P:signal transduction; P:positive regulation of type I interferon production		IPR029158 (PFAM); IPR000157 (G3DSA:3.40.50.GENE3D); IPR000157 (SUPERFAMILY); IPR000157 (SUPERFAMILY)
CGI_10010543	hypothetical protein CGI_10010543	978	0.88
CGI_10002145	A-agglutinin anchorage subunit-like	555	0.6205	P:integrin-mediated signaling pathway; P:proteolysis; C:membrane; C:mediator complex; C:integral component of membrane; F:metalloendopeptidase activity; F:RNA polymerase II transcription cofactor activity; F:metallopeptidase activity; P:regulation of transcription from RNA polymerase II promoter		no IPS match
CGI_10018761	acetylcholine receptor subunit alpha-1-B-like isoform X2 [Crassostrea gigas]	1431	0.6395	P:ion transmembrane transport; C:integral component of membrane; F:extracellular ligand-gated ion channel activity
CGI_10000207	partial [Nematostella vectensis]	186	0.85			PTHR33626 (PANTHER)
CGI_10009812	Nucleoredoxin [Crassostrea gigas]	432	0.697	C:cell; P:cell redox homeostasis		IPR012336 (PFAM); IPR012336 (G3DSA:3.40.30.GENE3D); PTHR13871 (PANTHER); IPR013766 (PROSITE_PROFILES); IPR012336 (SUPERFAMILY)
CGI_10027216	hypothetical protein CGI_10027216	1392	1
CGI_10023603	E3 ubiquitin- ligase HERC1	471	0.8611	F:ubiquitin-protein transferase activity; F:ligase activity; P:protein ubiquitination
CGI_10010482	kelch 24 [Crassostrea gigas]	1764	0.5775
CGI_10028252	hypothetical protein CGI_10028252	1224	1			no IPS match
CGI_10019074	Ribosomal RNA small subunit methyltransferase NEP1	675	0.8535	C:small-subunit processome; P:maturation of SSU-rRNA from tricistronic rRNA transcript (SSU-rRNA, 5.8S rRNA, LSU-rRNA); P:rRNA base methylation; F:rRNA (pseudouridine) methyltransferase activity; C:nucleolus; F:rRNA binding; P:nucleologenesis		IPR005304 (PFAM); IPR005304 (PANTHER); IPR029028 (SUPERFAMILY)
CGI_10022374	PREDICTED: uncharacterized protein LOC105347287 isoform X2 [Crassostrea gigas]	372	0.985	C:integral component of membrane		IPR007014 (PFAM)
CGI_10024931	l(2)37Cc [Wasmannia auropunctata]	606	0.9105	C:membrane
CGI_10009465	cholecystokinin receptor-like [Crassostrea gigas]	975	0.652	F:G-protein coupled receptor activity; P:G-protein coupled receptor signaling pathway; C:integral component of membrane
CGI_10004183	purine nucleoside phosphorylase-like	993	0.77	P:nucleoside metabolic process; F:purine-nucleoside phosphorylase activity	EC:2.4.2.1
CGI_10006860	fatty acyl- reductase 1-like	1578	0.793	C:integral component of membrane; P:oxidation-reduction process; F:fatty-acyl-CoA reductase (alcohol-forming) activity
CGI_10018046	interleukin-1 receptor-associated kinase 4-like	1611	0.685	F:ATP binding; F:protein serine/threonine kinase activity; P:protein phosphorylation	EC:2.7.11	IPR000719 (SMART); IPR000719 (PFAM); G3DSA:1.10.510.10 (GENE3D); G3DSA:3.30.200.20 (GENE3D); IPR011029 (G3DSA:1.10.533.GENE3D); IPR029397 (PFAM); PTHR24419:SF22 (PANTHER); PTHR24419 (PANTHER); IPR000719 (PROSITE_PROFILES); IPR011009 (SUPERFAMILY); IPR011029 (SUPERFAMILY)
CGI_10024018	PREDICTED: uncharacterized protein LOC105338054 isoform X2 [Crassostrea gigas]	1068	0.995
CGI_10011431	inosine-5 -monophosphate dehydrogenase 1b-like isoform X1 [Crassostrea gigas]	1671	0.9445	F:metal ion binding; F:IMP dehydrogenase activity; P:oxidation-reduction process; P:GMP biosynthetic process	EC:1.1.1.205
CGI_10018117	Baculoviral IAP repeat-containing 2	1131	0.8625	F:zinc ion binding; C:integral component of membrane
CGI_10020563	helicase with zinc finger domain 2-like isoform X2	11598	0.5785	F:metal ion binding; P:metabolic process; F:helicase activity
CGI_10012322	E3 ubiquitin- ligase NEURL1B-like isoform X2 [Crassostrea gigas]	1614	0.8008	F:zinc ion binding; C:integral component of membrane		IPR009311 (PFAM); PF13920 (PFAM); IPR013083 (G3DSA:3.30.40.GENE3D); IPR009311 (PANTHER); PTHR16932:SF18 (PANTHER)
CGI_10005193	Toll-like receptor 2	633	0.779	P:signal transduction; C:integral component of membrane		IPR000157 (SMART); IPR000157 (PFAM); IPR000157 (G3DSA:3.40.50.GENE3D); PTHR24365:SF316 (PANTHER); PTHR24365 (PANTHER); IPR000157 (PROSITE_PROFILES); IPR000157 (SUPERFAMILY)
CGI_10013002	PREDICTED: uncharacterized protein LOC105341499 [Crassostrea gigas]	945	0.639	C:integral component of membrane		IPR004307 (PFAM); PTHR33802:SF1 (PANTHER); PTHR33802 (PANTHER); SSF81321 (SUPERFAMILY)
CGI_10017186	bifunctional glutamate proline--tRNA ligase-like	5043	0.7405	F:ATP binding; C:cytoplasm; F:proline-tRNA ligase activity; F:glutamate-tRNA ligase activity; P:glutamyl-tRNA aminoacylation; P:prolyl-tRNA aminoacylation	EC:6.1.1.15; EC:6.1.1.17
CGI_10008207	Nucleolar pre-ribosomal-associated 1	6525	0.617	C:nucleolus; F:poly(A) RNA binding		IPR032436 (PFAM); IPR021714 (PFAM); PTHR13500 (PANTHER); IPR016024 (SUPERFAMILY); IPR016024 (SUPERFAMILY)
CGI_10002807	RING finger 121-like	1248	0.8795	C:endoplasmic reticulum membrane; F:zinc ion binding; F:ubiquitin protein ligase activity; P:regulation of ER-associated ubiquitin-dependent protein catabolic process; P:endoplasmic reticulum unfolded protein response; P:thigmotaxis; C:integral component of membrane; C:Golgi membrane; P:ER-associated ubiquitin-dependent protein catabolic process; P:protein localization to plasma membrane; P:prote…		IPR013083 (G3DSA:3.30.40.GENE3D); PTHR13407 (PANTHER); IPR001841 (PROSITE_PROFILES); SSF57850 (SUPERFAMILY)
CGI_10011499	U3 small nucleolar RNA-interacting 2 isoform X2	798	0.819	C:small-subunit processome; F:snoRNA binding; P:rRNA processing
CGI_10000788	DNA-directed RNA polymerase I subunit RPA12	342	0.76	F:nucleic acid binding; C:DNA-directed RNA polymerase I complex; F:zinc ion binding; F:RNA polymerase I activity; P:termination of RNA polymerase I transcription		IPR001222 (SMART); IPR012164 (PIRSF); IPR001222 (PFAM); G3DSA:2.20.25.10 (GENE3D); G3DSA:3.30.60.20 (GENE3D); PTHR11239:SF14 (PANTHER); PTHR11239 (PANTHER); IPR001222 (PROSITE_PROFILES); SSF57783 (SUPERFAMILY)
CGI_10022305	peptidyl-prolyl cis-trans isomerase FKBP2 [Saimiri boliviensis boliviensis]	438	0.8305	C:endoplasmic reticulum membrane; F:peptidyl-prolyl cis-trans isomerase activity; C:extracellular exosome; F:FK506 binding; P:chaperone-mediated protein folding; P:protein peptidyl-prolyl isomerization	EC:5.2.1.8
CGI_10012435	DDB1- and CUL4-associated factor 13	1335	0.8285	C:small-subunit processome; P:maturation of SSU-rRNA from tricistronic rRNA transcript (SSU-rRNA, 5.8S rRNA, LSU-rRNA); C:nucleolus; C:Cul4-RING E3 ubiquitin ligase complex
CGI_10016435	RWD domain-containing 1-like	207	0.9833			IPR016135 (G3DSA:3.10.110.GENE3D)
CGI_10019765	fatty acid desaturase 1-like isoform X1 [Aplysia californica]	1302	0.8005	F:oxidoreductase activity; P:lipid metabolic process; C:integral component of membrane; P:oxidation-reduction process		IPR001199 (SMART); IPR012171 (PIRSF); IPR001199 (PFAM); IPR005804 (PFAM); IPR001199 (G3DSA:3.10.120.GENE3D); PTHR19353:SF12 (PANTHER); PTHR19353 (PANTHER); IPR001199 (PROSITE_PROFILES); IPR001199 (SUPERFAMILY)
CGI_10007119	hypothetical protein CGI_10007119	5994	0.727	P:apoptotic process; C:intracellular		G3DSA:2.10.25.10 (GENE3D); PTHR16897:SF4 (PANTHER); PTHR16897 (PANTHER); IPR000742 (PROSITE_PROFILES)
CGI_10007050	Ubiquitin-like modifier-activating enzyme 1	2652	0.718	C:nucleus; F:ubiquitin-protein transferase activity; F:ATP binding; P:axonogenesis; P:cellular protein modification process; C:cytosol; F:ubiquitin activating enzyme activity; P:ubiquitin-dependent protein catabolic process		IPR000011 (PRINTS); IPR018965 (SMART); IPR000594 (PFAM); IPR016040 (G3DSA:3.40.50.GENE3D); IPR019572 (G3DSA:1.10.3240.GENE3D); IPR032418 (PFAM); IPR032420 (PFAM); IPR019572 (PFAM); IPR016040 (G3DSA:3.40.50.GENE3D); IPR018965 (PFAM); PTHR10953 (PANTHER); PTHR10953:SF144 (PANTHER); IPR000594 (SUPERFAMILY); IPR000594 (SUPERFAMILY)
CGI_10020990	glutamine--tRNA ligase	2199	0.833	F:ATP binding; C:cytoplasm; F:glutamine-tRNA ligase activity; P:glutaminyl-tRNA aminoacylation	EC:6.1.1.18
CGI_10026727	cell death abnormality 1-like	450	0.602			no IPS match
CGI_10005582	Tripartite motif-containing 3	660	0.7295	F:zinc ion binding; C:intracellular
CGI_10000562	2 -deoxynucleoside 5 -phosphate N-hydrolase 1	429	0.758	C:nucleus; F:nucleoside deoxyribosyltransferase activity; P:positive regulation of cell growth; F:deoxyribonucleoside 5'-monophosphate N-glycosidase activity; C:cytoplasm; P:nucleoside metabolic process; P:deoxyribonucleoside monophosphate catabolic process; F:DNA N-glycosylase activity; P:nucleotide metabolic process	EC:2.4.2.6; EC:3.2.2	IPR007710 (G3DSA:3.40.50.GENE3D); IPR007710 (PFAM); PTHR15364 (PANTHER); PTHR15364:SF0 (PANTHER); IPR028607 (HAMAP); SSF52309 (SUPERFAMILY)
CGI_10025768	THO complex subunit 4-like	918	0.764	F:nucleotide binding; F:nucleic acid binding
CGI_10009433	ERO1 alpha isoform X4	1362	0.7755	F:protein disulfide isomerase activity; F:oxidoreductase activity, acting on a sulfur group of donors, disulfide as acceptor; C:endoplasmic reticulum; P:oxidation-reduction process; P:protein folding	EC:5.3.4.1	IPR007266 (PIRSF); IPR007266 (PFAM); IPR007266 (PANTHER); SSF110019 (SUPERFAMILY)
CGI_10022150	nucleolar complex 2 homolog	957	0.75	P:negative regulation of transcription from RNA polymerase II promoter; P:negative regulation of histone acetylation; F:repressing transcription factor binding; F:transcription corepressor activity; F:histone binding; C:Noc2p-Noc3p complex; P:ribosomal large subunit biogenesis; C:Noc1p-Noc2p complex; C:nucleolus; C:nucleoplasm
CGI_10017851	complement C1q tumor necrosis factor-related 4-like	186	0.8033
CGI_10023439	ATPase family AAA domain-containing 2-like isoform X3	6432	0.7815	F:ATP binding; P:fatty acid beta-oxidation; C:mitochondrial fatty acid beta-oxidation multienzyme complex; F:3-hydroxyacyl-CoA dehydrogenase activity; F:enoyl-CoA hydratase activity	EC:1.1.1.35; EC:4.2.1.17
CGI_10017661	ER membrane complex subunit 8-like	603	0.6585	C:cytoplasm; C:mitochondrion; C:membrane; C:ER membrane protein complex
CGI_10000980	phosducin 3	717	0.819	C:nucleus; P:regulation of peptidyl-tyrosine phosphorylation; P:queuosine biosynthetic process; F:protein binding involved in protein folding; C:cytoplasm; F:vascular endothelial growth factor receptor 2 binding; P:positive regulation of endothelial cell proliferation; P:protein folding; P:positive regulation of angiogenesis; F:queuine tRNA-ribosyltransferase activity; P:negative regulation of pr…	EC:2.4.2.29	IPR012336 (G3DSA:3.40.30.GENE3D); IPR024253 (PFAM); PTHR21148:SF24 (PANTHER); PTHR21148 (PANTHER); IPR012336 (SUPERFAMILY)
CGI_10012947	Signal peptidase complex catalytic subunit SEC11A	531	0.957	C:endoplasmic reticulum membrane; C:integral component of membrane; F:serine-type peptidase activity; P:signal peptide processing
CGI_10014031	endoplasmic reticulum-Golgi intermediate compartment 3-like	1194	0.8315	C:endoplasmic reticulum membrane; P:vesicle-mediated transport; C:integral component of membrane; C:Golgi apparatus; C:endoplasmic reticulum-Golgi intermediate compartment membrane
CGI_10005186	tRNA (guanine-N(7)-)-methyltransferase	537	0.8865	P:RNA (guanine-N7)-methylation; C:nucleus; F:tRNA (guanine-N7-)-methyltransferase activity; F:tRNA binding; P:tRNA methylation	EC:2.1.1.33
CGI_10022696	uncharacterized membrane YGR149W-like	1077	0.647	C:integral component of membrane		IPR021261 (PFAM); PTHR31201:SF1 (PANTHER); PTHR31201 (PANTHER)
CGI_10002892	Vesicular glutamate transporter partial	1455	0.657	P:transmembrane transport; C:integral component of membrane		G3DSA:1.20.1250.20 (GENE3D); IPR011701 (PFAM); PTHR11662 (PANTHER); PTHR11662:SF29 (PANTHER); IPR020846 (PROSITE_PROFILES); IPR020846 (SUPERFAMILY)
CGI_10018017	Ras-related Rab-1A	552	0.717	F:GTP binding; P:nucleocytoplasmic transport; P:small GTPase mediated signal transduction; F:GTPase activity; C:membrane; P:metabolic process; P:cellular component organization; C:Golgi apparatus part; P:vacuolar transport; P:intracellular protein transport; P:Golgi vesicle transport		PR00449 (PRINTS); SM00174 (SMART); SM00176 (SMART); SM00173 (SMART); SM00175 (SMART); IPR027417 (G3DSA:3.40.50.GENE3D); IPR001806 (PFAM); IPR005225 (TIGRFAM); PTHR24073 (PANTHER); PS51419 (PROSITE_PROFILES); IPR027417 (SUPERFAMILY)
CGI_10020758	transmembrane emp24 domain-containing 7-like	624	0.8315	C:integral component of membrane; P:transport
CGI_10028328	dual specificity phosphatase 19-like	630	0.6665	F:protein tyrosine phosphatase activity; P:peptidyl-tyrosine dephosphorylation; F:protein tyrosine/serine/threonine phosphatase activity	EC:3.1.3.48; EC:3.1.3
CGI_10009719	elongation factor mitochondrial-like	1428	0.7935	F:GTP binding; F:translation elongation factor activity; F:GTPase activity; C:mitochondrion; P:mitochondrial translational elongation		IPR000795 (PRINTS); IPR027417 (G3DSA:3.40.50.GENE3D); IPR004160 (PFAM); IPR004161 (PFAM); G3DSA:2.40.30.10 (GENE3D); G3DSA:2.40.30.10 (GENE3D); IPR005225 (TIGRFAM); PF00009 (PFAM); PTHR23115 (PANTHER); PTHR23115:SF177 (PANTHER); IPR000795 (PROSITE_PROFILES); IPR027417 (SUPERFAMILY); IPR009001 (SUPERFAMILY); IPR009000 (SUPERFAMILY)
CGI_10011158	lipophorin receptor	2706	0.69	F:calcium ion binding; C:integral component of membrane		IPR002172 (PRINTS); IPR000742 (SMART); IPR001881 (SMART); IPR002172 (SMART); IPR000033 (SMART); IPR000033 (PFAM); G3DSA:4.10.1220.10 (GENE3D); IPR002172 (G3DSA:4.10.400.GENE3D); IPR002172 (G3DSA:4.10.400.GENE3D); G3DSA:2.10.25.10 (GENE3D); IPR002172 (PFAM); IPR011042 (G3DSA:2.120.10.GENE3D); G3DSA:2.10.25.10 (GENE3D); IPR002172 (G3DSA:4.10.400.GENE3D); G3DSA:2.10.25.10 (GENE3D); IPR002172 (G3DSA:…
CGI_10008301	fatty acid-binding heart [Myotis brandtii]	432	0.557	F:lipid binding; P:transport; F:transporter activity
CGI_10004799	hypothetical protein CGI_10004799	495	0.8133	C:integral component of membrane
CGI_10012048	glucose transporter type 1 isoform X7	1653	0.6915	F:zinc ion binding; F:substrate-specific transmembrane transporter activity; P:transmembrane transport; P:proteolysis; C:integral component of membrane; P:carbohydrate transport; F:metalloendopeptidase activity	EC:3.4.24	IPR003663 (PRINTS); G3DSA:1.20.1250.20 (GENE3D); IPR005828 (PFAM); IPR003663 (TIGRFAM); PTHR23503 (PANTHER); IPR020846 (PROSITE_PROFILES); IPR020846 (SUPERFAMILY)
CGI_10016842	cysteine and tyrosine-rich 1-like	1407	0.995	C:integral component of membrane
CGI_10012202	SDA1 homolog	1107	0.6435	C:cell; P:ribosomal large subunit export from nucleus; P:ribosomal large subunit biogenesis; F:binding; P:actin cytoskeleton organization; P:response to stimulus
CGI_10000851	DNA-directed RNA polymerase III subunit RPC3	1464	0.638	C:nucleus; F:DNA binding; F:DNA-directed RNA polymerase activity; P:transcription, DNA-templated	EC:2.7.7.6	IPR013197 (PFAM); IPR008806 (PFAM); PTHR12949 (PANTHER)
CGI_10009974	Small glutamine-rich tetratricopeptide repeat-containing alpha	798	0.743
CGI_10023385	PREDICTED: uncharacterized protein LOC105342558	1014	0.6021			IPR029021 (G3DSA:3.90.190.GENE3D); IPR029021 (SUPERFAMILY)
CGI_10011866	Translocon-associated subunit alpha	846	0.7655	C:endoplasmic reticulum membrane; C:integral component of membrane		IPR005595 (PFAM); PTHR12924:SF0 (PANTHER); PTHR12924 (PANTHER)
CGI_10007908	grpE homolog mitochondrial-like isoform X1	831	0.798	F:protein homodimerization activity; C:mitochondrial matrix; F:chaperone binding; P:regulation of catalytic activity; P:protein folding; F:adenyl-nucleotide exchange factor activity		IPR000740 (PRINTS); IPR000740 (PFAM); IPR013805 (G3DSA:3.90.20.GENE3D); IPR009012 (G3DSA:2.30.22.GENE3D); PTHR21237:SF25 (PANTHER); IPR000740 (PANTHER); IPR000740 (HAMAP); IPR009012 (SUPERFAMILY); SSF58014 (SUPERFAMILY)
CGI_10022009	required for meiotic nuclear division 1 homolog	1614	0.7265	P:biological_process; C:cellular_component; F:molecular_function
CGI_10008361	E3 ubiquitin- ligase listerin	5136	0.593	F:binding		PTHR12389 (PANTHER); IPR016024 (SUPERFAMILY)
CGI_10011047	Neuronal acetylcholine receptor subunit alpha-6	2841	0.7115	P:ion transmembrane transport; C:integral component of membrane; F:extracellular ligand-gated ion channel activity
CGI_10021154	NEDD8 ultimate buster 1-like	1524	0.7425
CGI_10012792	Fbox domain containing [Acanthamoeba castellanii Neff]	1023	0.7215			IPR002035 (SMART); IPR002035 (G3DSA:3.40.50.GENE3D); IPR002035 (PFAM); PTHR14187 (PANTHER); PTHR14187:SF3 (PANTHER); IPR002035 (PROSITE_PROFILES); IPR002035 (SUPERFAMILY)
CGI_10008268	microsomal triglyceride transfer large subunit-like	2898	0.6555	P:lipid transport; F:lipid transporter activity; P:response to stress		IPR006015 (PRINTS); IPR001747 (SMART); IPR006016 (PFAM); IPR014729 (G3DSA:3.40.50.GENE3D); IPR015816 (G3DSA:2.30.230.GENE3D); IPR001747 (PFAM); IPR011042 (G3DSA:2.120.10.GENE3D); IPR011030 (G3DSA:1.25.10.GENE3D); PTHR13024:SF0 (PANTHER); PTHR13024 (PANTHER); IPR001747 (PROSITE_PROFILES); SSF52402 (SUPERFAMILY); IPR011030 (SUPERFAMILY); SSF101898 (SUPERFAMILY); IPR015819 (SUPERFAMILY)
CGI_10015013	ubiquitin-fold modifier 1	342	0.9655	C:nucleus; C:extracellular exosome; C:cytoplasm; P:regulation of intracellular estrogen receptor signaling pathway; P:protein K69-linked ufmylation; P:response to endoplasmic reticulum stress
CGI_10023537	PR domain zinc finger 5-like [Crassostrea gigas]	6192	0.537	F:DNA binding; F:metal ion binding
CGI_10003170	proteasome subunit beta type-2	627	0.8645	C:extracellular exosome; C:cytoplasm; C:proteasome core complex; C:membrane; F:threonine-type endopeptidase activity; P:proteolysis involved in cellular protein catabolic process; C:nucleoplasm	EC:3.4.25
CGI_10012107	nuclear pore membrane glyco 210	8100	0.61	C:nucleus; F:calcium ion binding; C:integral component of membrane; F:sequence-specific DNA binding; P:homophilic cell adhesion via plasma membrane adhesion molecules
CGI_10018862	aminoacyl tRNA synthase complex-interacting multifunctional 1	951	0.6765	F:protein homodimerization activity; P:cell-cell signaling; P:response to wounding; F:tRNA binding; F:cytokine activity; C:cell surface; P:tRNA aminoacylation for protein translation; P:chemotaxis; C:extracellular space; F:aminoacyl-tRNA ligase activity; P:inflammatory response; C:intracellular membrane-bounded organelle; F:GTPase binding; C:membrane; C:cytosol; C:endomembrane system; C:aminoacyl…	EC:6.1.1
CGI_10018703	Small nuclear ribonucleo Sm D1	2067	0.8715	C:intracellular ribonucleoprotein complex; C:viral nucleocapsid; P:RNA processing		IPR002172 (PRINTS); IPR000859 (SMART); IPR001163 (SMART); IPR002172 (SMART); IPR002172 (PFAM); IPR002172 (G3DSA:4.10.400.GENE3D); IPR001163 (PFAM); IPR000859 (G3DSA:2.60.120.GENE3D); IPR000859 (G3DSA:2.60.120.GENE3D); G3DSA:2.30.30.100 (GENE3D); IPR002172 (G3DSA:4.10.400.GENE3D); IPR027141 (PANTHER); IPR000859 (PROSITE_PROFILES); IPR002172 (PROSITE_PROFILES); IPR010920 (SUPERFAMILY); IPR000859 (S…
CGI_10021082	mitochondrial import receptor subunit TOM40 homolog 1-like	786	0.736	P:transmembrane transport; C:mitochondrial outer membrane
CGI_10025038	Spore cortex-lytic enzyme	501	0.705	P:metabolic process; F:hydrolase activity		IPR011105 (PFAM)
CGI_10012483	Poly [ADP-ribose] polymerase 14	3021	0.6025	P:metabolic process; F:NAD+ ADP-ribosyltransferase activity	EC:2.4.2.30
CGI_10008437	RWD domain-containing 1-like	702	0.745	C:cellular_component
CGI_10022282	Signal peptidase complex catalytic subunit SEC11A	672	0.954	C:endoplasmic reticulum membrane; C:integral component of membrane; F:serine-type peptidase activity; P:signal peptide processing
CGI_10024520	phosphorylase b kinase gamma catalytic skeletal muscle heart isoform isoform X2	1500	0.776	F:phosphorylase kinase activity; C:phosphorylase kinase complex; F:ATP binding; F:calmodulin binding; P:glycogen biosynthetic process; P:protein phosphorylation	EC:2.7.11.19	IPR002291 (PRINTS); IPR000719 (SMART); IPR000719 (PFAM); G3DSA:3.30.200.20 (GENE3D); G3DSA:1.10.510.10 (GENE3D); PTHR24347:SF121 (PANTHER); IPR020636 (PANTHER); IPR000719 (PROSITE_PROFILES); IPR011009 (SUPERFAMILY)
CGI_10010203	DNA-directed RNA polymerase III subunit RPC5	1890	0.685	C:nucleus; F:DNA-directed RNA polymerase activity; P:transcription, DNA-templated	EC:2.7.7.6
CGI_10007528	Golgi to ER traffic 4 homolog	1002	0.758			IPR007317 (PFAM); IPR007317 (PANTHER); PTHR12875:SF0 (PANTHER); IPR011990 (SUPERFAMILY)
CGI_10017292	sacsin-like [Acropora digitifera]	1581	0.7875	F:structural constituent of ribosome; C:ribosome; P:translation		IPR001515 (SMART); IPR001515 (PFAM); PTHR23413 (PANTHER); IPR001515 (PRODOM); IPR001515 (SUPERFAMILY)
CGI_10007216	ubiquitin carboxyl-terminal hydrolase 5-like	2388	0.7755	P:protein deubiquitination; F:zinc ion binding; F:omega peptidase activity; F:thiol-dependent ubiquitinyl hydrolase activity; P:ubiquitin-dependent protein catabolic process	EC:3.4.19; EC:3.4.19.12
CGI_10018940	exosome complex component RRP42	789	0.827	P:U4 snRNA 3'-end processing; P:U1 snRNA 3'-end processing; P:exonucleolytic nuclear-transcribed mRNA catabolic process involved in deadenylation-dependent decay; P:exonucleolytic trimming to generate mature 3'-end of 5.8S rRNA from tricistronic rRNA transcript (SSU-rRNA, 5.8S rRNA, LSU-rRNA); C:cytoplasmic exosome (RNase complex); F:AU-rich element binding; P:nuclear polyadenylation-dependent mR…		IPR015847 (PFAM); IPR001247 (PFAM); IPR027408 (G3DSA:3.30.230.GENE3D); PTHR11097 (PANTHER); PTHR11097:SF8 (PANTHER); IPR015847 (SUPERFAMILY); IPR020568 (SUPERFAMILY)
CGI_10022607	cell death abnormality 1-like	588	0.6585	C:membrane; C:integral component of membrane		no IPS match
CGI_10020639	tRNA-dihydrouridine(16 17) synthase [NAD(P)(+)]-like	1458	0.759	F:tRNA dihydrouridine synthase activity; P:tRNA dihydrouridine synthesis; F:flavin adenine dinucleotide binding; C:cytosol; P:oxidation-reduction process
CGI_10019360	PREDICTED: uncharacterized protein LOC105348032 [Crassostrea gigas]	789	0.6313			no IPS match
CGI_10012052	hypothetical protein CGI_10012052	1161	0.4628	F:hydrolase activity, acting on carbon-nitrogen (but not peptide) bonds; P:carbohydrate metabolic process; F:catalytic activity; C:membrane; C:integral component of membrane		no IPS match
CGI_10020979	myeloid differentiation primary response 88-like [Crassostrea gigas]	459	0.5845	P:signal transduction		IPR000157 (G3DSA:3.40.50.GENE3D); PTHR15079 (PANTHER); IPR000157 (SUPERFAMILY)
CGI_10014849	RRP15 isoform X2	591	0.691	C:intracellular membrane-bounded organelle
CGI_10015619	nuclear pore complex Nup93-like [Crassostrea gigas]	2472	0.7615	C:nuclear membrane; P:protein import into nucleus; F:structural constituent of nuclear pore; C:nuclear periphery; P:nuclear pore complex assembly; C:viral capsid; P:response to stress; P:macroautophagy; P:poly(A)+ mRNA export from nucleus; C:nuclear pore
CGI_10026012	translocon-associated subunit gamma-like	561	0.882	P:SRP-dependent cotranslational protein targeting to membrane; C:integral component of membrane; C:intracellular
CGI_10022211	zinc finger with UFM1-specific peptidase domain -like isoform X2	1140	0.688	F:metal ion binding
CGI_10025667	proteasome subunit alpha type-7-like	750	0.9255	C:spermatoproteasome complex; C:nucleus; C:extracellular exosome; C:cytoplasm; C:proteasome core complex, alpha-subunit complex; F:threonine-type endopeptidase activity; P:ubiquitin-dependent protein catabolic process	EC:3.4.25	IPR000426 (SMART); IPR000426 (PFAM); IPR029055 (G3DSA:3.60.20.GENE3D); IPR001353 (PFAM); PTHR11599:SF47 (PANTHER); PTHR11599 (PANTHER); IPR023332 (PROSITE_PROFILES); IPR029055 (SUPERFAMILY)
CGI_10000066	Metallothionein [Crassostrea gigas]	324	0.978	F:metal ion binding		IPR001008 (PRINTS); IPR003019 (PFAM)
CGI_10028819	PBDC1 isoform X2	414	0.8075			IPR023139 (G3DSA:1.10.3560.GENE3D); IPR021148 (PFAM); IPR008476 (PANTHER)
CGI_10013922	PREDICTED: uncharacterized protein LOC105336293	222	1
CGI_10014623	methionine--tRNA cytoplasmic isoform X2	984	0.7045	F:ATP binding; P:tRNA aminoacylation for protein translation; C:extracellular exosome; F:methionine-tRNA ligase activity; C:membrane; C:cytosol	EC:6.1.1.10
CGI_10010526	temptin-like	453	0.5535	F:oxidoreductase activity, acting on paired donors, with incorporation or reduction of molecular oxygen, reduced ascorbate as one donor, and incorporation of one atom of oxygen; F:copper ion binding; F:catalytic activity; P:oxidation-reduction process; F:monooxygenase activity		PTHR34737:SF2 (PANTHER); PTHR34737 (PANTHER)
CGI_10002475	Signal recognition particle 19 kDa	321	0.8255	P:SRP-dependent cotranslational protein targeting to membrane; C:signal recognition particle; F:7S RNA binding
CGI_10009220	GH3 domain-containing	1917	0.695	C:integral component of membrane		IPR004993 (PFAM); IPR004993 (PANTHER); PTHR31901:SF5 (PANTHER)
CGI_10022448	paladin-like isoform X2 [Biomphalaria glabrata]	5673	0.6485	F:calcium ion binding; C:integral component of membrane
CGI_10004054	regulator of nonsense transcripts 1 isoform X2	3327	0.8635	F:DNA binding; F:ATP binding; F:zinc ion binding; P:nuclear-transcribed mRNA catabolic process, nonsense-mediated decay; C:cytoplasm; F:helicase activity
CGI_10024002	Methylated-DNA-- -cysteine methyltransferase	1170	0.8383	P:DNA repair; C:integral component of membrane; F:semaphorin receptor activity; F:methylated-DNA-[protein]-cysteine S-methyltransferase activity; P:methylation; P:semaphorin-plexin signaling pathway	EC:2.1.1.63
CGI_10004162	eva-1 homolog C	1122	0.6565	C:integral component of membrane; F:carbohydrate binding		PF14851 (PFAM); IPR000922 (PFAM); PTHR12011:SF311 (PANTHER); PTHR12011 (PANTHER); IPR000922 (PROSITE_PROFILES)
CGI_10006542	bcl-2 1	618	0.651	C:membrane; P:apoptotic signaling pathway; F:protein dimerization activity; P:regulation of apoptotic process		IPR026298 (PRINTS); SM00337 (SMART); G3DSA:1.10.437.10 (GENE3D); IPR026298 (PFAM); IPR026298 (PANTHER); PTHR11256:SF45 (PANTHER); IPR002475 (PROSITE_PROFILES); SSF56854 (SUPERFAMILY)
CGI_10020509	5-hydroxytryptamine receptor 1-like [Crassostrea gigas]	573	0.619	P:signal transduction; C:membrane; F:signal transducer activity
CGI_10026048	disulfide isomerase	1488	0.8075	F:dioxygenase activity; F:protein disulfide isomerase activity; F:protein disulfide oxidoreductase activity; C:endoplasmic reticulum; P:cell redox homeostasis; P:oxidation-reduction process; P:protein folding	EC:5.3.4.1	PR00421 (PRINTS); IPR012336 (G3DSA:3.40.30.GENE3D); PF13848 (PFAM); IPR012336 (G3DSA:3.40.30.GENE3D); IPR005792 (TIGRFAM); IPR012336 (G3DSA:3.40.30.GENE3D); IPR005788 (TIGRFAM); IPR013766 (PFAM); PTHR18929 (PANTHER); PTHR18929:SF101 (PANTHER); IPR013766 (PROSITE_PROFILES); IPR012336 (SUPERFAMILY); IPR012336 (SUPERFAMILY); IPR012336 (SUPERFAMILY); IPR012336 (SUPERFAMILY)
CGI_10003945	circularly permutated Ras 1-like	2619	0.5985	F:GTP binding; F:zinc ion binding; P:ER to Golgi vesicle-mediated transport; P:small GTPase mediated signal transduction; P:intracellular protein transport; C:COPII vesicle coat
CGI_10018037	collagen alpha-1(IV) chain-like	768	0.8475	F:nucleotide binding; F:RNA binding; C:collagen trimer; C:integral component of membrane; P:RNA processing; F:extracellular matrix structural constituent; C:proteinaceous extracellular matrix		IPR001442 (SMART); IPR001442 (G3DSA:2.170.240.GENE3D); IPR001442 (PFAM); PTHR24023:SF563 (PANTHER); PTHR24023 (PANTHER); IPR001442 (PROSITE_PROFILES); IPR016187 (SUPERFAMILY)
CGI_10004804	hypothetical protein CGI_10004804	207	1
CGI_10018107	glutamate-rich WD repeat-containing 1-like	1368	0.786	C:nucleus
CGI_10028924	Toll-like receptor 4	1455	0.607	C:integral component of membrane		IPR003591 (SMART); IPR032675 (G3DSA:3.80.10.GENE3D); IPR001611 (PFAM); IPR032675 (G3DSA:3.80.10.GENE3D); PTHR24365 (PANTHER); IPR001611 (PROSITE_PROFILES); IPR032675 (SUPERFAMILY)
CGI_10000964	hypothetical protein CGI_10000964	276	1			no IPS match
CGI_10028447	allene oxide synthase-lipoxygenase -like	795	0.7467	F:oxidoreductase activity, acting on single donors with incorporation of molecular oxygen, incorporation of two atoms of oxygen; F:metal ion binding; P:oxidation-reduction process	EC:1.13.11	IPR025452 (PFAM); G3DSA:1.20.245.10 (GENE3D); IPR013819 (SUPERFAMILY)
CGI_10023309	pre-mRNA-processing factor 19	1530	0.877	F:ubiquitin-protein transferase activity; P:protein ubiquitination
CGI_10027722	Inorganic pyrophosphatase	1281	0.8265	F:magnesium ion binding; F:inorganic diphosphatase activity; C:cytoplasm; P:phosphate-containing compound metabolic process	EC:3.6.1.1	IPR008162 (PFAM); IPR008162 (G3DSA:3.90.80.GENE3D); IPR008162 (PANTHER); IPR008162 (SUPERFAMILY); IPR008162 (SUPERFAMILY)
CGI_10008382	F-box LRR-repeat 7-like	378	0.6725
CGI_10008027	ADP-ribosylation factor-like	570	0.8365	F:GTP binding; P:small GTPase mediated signal transduction; P:protein transport; C:intracellular		IPR006689 (PRINTS); SM00175 (SMART); SM00177 (SMART); SM00178 (SMART); IPR005225 (TIGRFAM); IPR006689 (PFAM); IPR027417 (G3DSA:3.40.50.GENE3D); PTHR11711 (PANTHER); PTHR11711:SF198 (PANTHER); IPR024156 (PROSITE_PROFILES); IPR027417 (SUPERFAMILY)
CGI_10019977	ubiquitin thioesterase L96	4911	0.638
CGI_10009642	endoplasmic reticulum resident 44-like	1185	0.7445	F:protein disulfide isomerase activity; C:endoplasmic reticulum; P:cell redox homeostasis; P:protein folding; P:response to endoplasmic reticulum stress	EC:5.3.4.1
CGI_10025298	PRKC apoptosis WT1 regulator -like isoform X1	1221	0.5935	P:apoptotic process		IPR026117 (PANTHER)
CGI_10012683	ras-like GTP-binding Rho1 isoform X3 [Dinoponera quadriceps]	549	0.7895	P:ventral furrow formation; P:posterior midgut invagination; P:regulation of locomotor rhythm; P:epidermal growth factor receptor signaling pathway; P:cell elongation involved in imaginal disc-derived wing morphogenesis; P:protein transport; P:germ-band extension; P:JNK cascade; P:border follicle cell migration; P:protein localization involved in establishment of planar polarity; P:glial cell mig…
CGI_10023590	beta-1,3-galactosyl-O-glycosyl-glyco beta-1,6-N-acetylglucosaminyltransferase-like	795	0.7825	F:acetylglucosaminyltransferase activity; P:metabolic process; C:integral component of membrane	EC:2.4.1	IPR003406 (PFAM); PTHR19297:SF96 (PANTHER); PTHR19297 (PANTHER)
CGI_10020612	hypothetical protein CGI_10020612	1650	1			no IPS match
CGI_10020533	PREDICTED: uncharacterized protein LOC105347740 [Crassostrea gigas]	582	0.6388
CGI_10024686	PREDICTED: uncharacterized protein LOC105320840 [Crassostrea gigas]	933	1
CGI_10003269	mitochondrial import inner membrane translocase subunit Tim21	669	0.645	C:mitochondrial inner membrane presequence translocase complex; P:protein import into mitochondrial matrix; C:integral component of membrane; P:mitochondrial respiratory chain complex assembly		IPR013261 (PFAM); IPR013261 (PANTHER)
CGI_10001365	DD3-3-like	1155	0.7295	F:DNA binding		PTHR35170:SF2 (PANTHER); PTHR35170 (PANTHER)
CGI_10025603	ankyrin repeat and SOCS box 12-like [Priapulus caudatus]	828	0.6035	F:methyltransferase activity; C:intracellular; P:intracellular signal transduction; P:methylation		IPR002110 (SMART); IPR001496 (SMART); IPR001496 (PFAM); IPR020683 (PFAM); IPR020683 (G3DSA:1.25.40.GENE3D); PTHR24198 (PANTHER); IPR002110 (PROSITE_PROFILES); IPR020683 (PROSITE_PROFILES); IPR001496 (PROSITE_PROFILES); IPR001496 (SUPERFAMILY); IPR020683 (SUPERFAMILY)
CGI_10000215	WD repeat-containing 74	1209	0.7255	P:ribosomal large subunit biogenesis; C:nucleolus; C:preribosome, large subunit precursor		IPR001680 (SMART); IPR015943 (G3DSA:2.130.10.GENE3D); PTHR16038:SF4 (PANTHER); PTHR16038 (PANTHER); IPR017986 (PROSITE_PROFILES); IPR017986 (SUPERFAMILY)
CGI_10018127	organic cation transporter [Octopus bimaculoides]	1335	0.655	P:transmembrane transport; F:transmembrane transporter activity; C:integral component of membrane
CGI_10022978	early growth response 1-B-like	1707	0.787	F:nucleic acid binding; F:metal ion binding		IPR015880 (SMART); IPR013087 (G3DSA:3.30.160.GENE3D); IPR013087 (G3DSA:3.30.160.GENE3D); IPR013087 (G3DSA:3.30.160.GENE3D); PTHR24409 (PANTHER); IPR007087 (PROSITE_PROFILES); SSF57667 (SUPERFAMILY); SSF57667 (SUPERFAMILY)
CGI_10028611	PMS1 homolog 1-like [Equus przewalskii]	2901	0.7345	C:chiasma; F:ATPase activity; F:ATP binding; C:MutLalpha complex; P:mismatch repair; F:mismatched DNA binding; C:synaptonemal complex; F:single-stranded DNA binding	EC:3.6.1.3	IPR013507 (SMART); IPR002099 (TIGRFAM); IPR013507 (PFAM); IPR003594 (G3DSA:3.30.565.GENE3D); IPR009071 (PFAM); IPR014721 (G3DSA:3.30.230.GENE3D); IPR009071 (G3DSA:1.10.30.GENE3D); PF13589 (PFAM); PTHR10073 (PANTHER); PTHR10073:SF43 (PANTHER); IPR009071 (PROSITE_PROFILES); IPR020568 (SUPERFAMILY); IPR009071 (SUPERFAMILY); IPR003594 (SUPERFAMILY)
CGI_10027074	hypothetical protein CGI_10027074	240	1
CGI_10016491	U6 snRNA-associated Sm LSm7	342	0.9385	C:U12-type spliceosomal complex; F:RNA binding; C:catalytic step 2 spliceosome; C:spliceosomal tri-snRNP complex; C:U2-type prespliceosome; C:Lsm1-7-Pat1 complex; C:U6 snRNP; C:small nucleolar ribonucleoprotein complex; P:mRNA splicing, via spliceosome		IPR001163 (SMART); IPR017132 (PIRSF); IPR001163 (PFAM); G3DSA:2.30.30.100 (GENE3D); PTHR10553 (PANTHER); PTHR10553:SF5 (PANTHER); IPR010920 (SUPERFAMILY)
CGI_10011373	phosphatidylserine synthase 2 [Cynoglossus semilaevis]	1224	0.7975	P:phosphatidylserine biosynthetic process; C:integral component of membrane		IPR004277 (PFAM); PTHR15362 (PANTHER); PTHR15362:SF12 (PANTHER)
CGI_10008737	tyrosinase tyr-3 [Crassostrea gigas]	2364	0.5415	F:oxidoreductase activity; F:metal ion binding; P:oxidation-reduction process		IPR002227 (PRINTS); IPR008922 (G3DSA:1.10.1280.GENE3D); IPR002227 (PFAM); PTHR11474:SF21 (PANTHER); PTHR11474 (PANTHER); IPR008922 (SUPERFAMILY)
CGI_10009476	SET and MYND domain-containing partial	1191	0.748			IPR001214 (SMART); G3DSA:2.170.270.10 (GENE3D); IPR001214 (PFAM); PTHR12197:SF183 (PANTHER); PTHR12197 (PANTHER); IPR001214 (PROSITE_PROFILES); SSF144232 (SUPERFAMILY); SSF82199 (SUPERFAMILY)
CGI_10010729	WD repeat-containing 75	2727	0.5855	C:nucleus; F:transcription cofactor activity; P:regulation of mitophagy; P:histone acetylation; P:positive regulation of protein targeting to mitochondrion; C:SAGA complex; F:poly(A) RNA binding; P:regulation of transcription from RNA polymerase II promoter
CGI_10005790	cell wall DAN4-like isoform X2	2001	0.7273
CGI_10006407	nardilysin isoform X1	2733	0.6385	F:protein binding; F:metal ion binding; C:mitochondrion; P:proteolysis; F:metalloendopeptidase activity	EC:3.4.24
CGI_10021605	H ACA ribonucleo complex subunit 1	570	0.8305	C:box H/ACA snoRNP complex; P:pseudouridine synthesis; F:protein binding; F:telomerase RNA binding; C:box H/ACA telomerase RNP complex; C:Cajal body; C:viral nucleocapsid; P:rRNA processing; C:nuclear chromosome, telomeric region; C:dense fibrillar component; F:box H/ACA snoRNA binding; F:poly(A) RNA binding		G3DSA:2.40.10.230 (GENE3D); IPR007504 (PFAM); IPR021154 (PANTHER); IPR021154 (PRODOM); IPR009000 (SUPERFAMILY)
CGI_10018521	Golgi reassembly-stacking 2	1332	0.702	C:Golgi apparatus; P:organelle organization
CGI_10005892	Serine threonine- kinase 19	765	0.7005	P:phosphorylation; F:kinase activity
CGI_10018684	brain-specific angiogenesis inhibitor 1-like	5820	0.5985	F:G-protein coupled receptor activity; P:negative regulation of angiogenesis; P:G-protein coupled receptor signaling pathway; C:integral component of membrane; F:scavenger receptor activity; P:cell surface receptor signaling pathway; P:receptor-mediated endocytosis		IPR001190 (PRINTS); IPR000832 (PRINTS); IPR008077 (PRINTS); IPR011641 (SMART); IPR003599 (SMART); IPR017448 (SMART); IPR001879 (SMART); IPR000203 (SMART); IPR032471 (PFAM); IPR000832 (PFAM); IPR000203 (PFAM); IPR013783 (G3DSA:2.60.40.GENE3D); IPR017448 (G3DSA:3.10.250.GENE3D); IPR013783 (G3DSA:2.60.40.GENE3D); G3DSA:2.10.25.10 (GENE3D); PF13927 (PFAM); IPR001190 (PFAM); G3DSA:2.10.50.10 (GENE3D);…
CGI_10004202	dolichol-phosphate mannosyltransferase subunit 3-like [Lingula anatina]	405	0.665	F:nucleic acid binding; F:metal ion binding
CGI_10001847	hypothetical protein CGI_10001847	597	0.7			IPR031941 (PFAM); PTHR36299:SF2 (PANTHER); PTHR36299 (PANTHER)
CGI_10028671	peroxisome proliferator-activated receptor gamma coactivator-related 1-like	657	0.752	F:organic cyclic compound binding; F:heterocyclic compound binding		PTHR15528 (PANTHER); PTHR15528:SF5 (PANTHER)
CGI_10011327	E3 ubiquitin- ligase TRIM33	2271	0.6395	F:zinc ion binding; P:metabolic process; C:intracellular; F:ligase activity
CGI_10006496	hypothetical protein CGI_10006496	489	1	C:integral component of membrane		no IPS match
CGI_10020359	Tripartite motif-containing 2 [Crassostrea gigas]	474	0.599	F:zinc ion binding; C:intracellular		no IPS match
CGI_10007750	Bardet-Biedl syndrome 12	2598	0.501	F:ATP binding
CGI_10017889	neurogenic locus Notch -like	4656	0.5685			PR01983 (PRINTS); PR00010 (PRINTS); IPR000742 (SMART); IPR001881 (SMART); IPR001774 (SMART); G3DSA:2.10.25.10 (GENE3D); G3DSA:2.170.300.10 (GENE3D); IPR001881 (PFAM); G3DSA:2.10.25.10 (GENE3D); G3DSA:2.10.25.10 (GENE3D); IPR016186 (G3DSA:3.10.100.GENE3D); IPR001774 (PFAM); G3DSA:2.10.25.10 (GENE3D); IPR000742 (PFAM); G3DSA:2.10.25.10 (GENE3D); G3DSA:2.10.25.10 (GENE3D); G3DSA:2.10.25.10 (GENE3D);…
CGI_10024194	follistatin-A-like isoform X1	921	0.636
CGI_10008799	hypothetical protein CGI_10008799	984	0.707	C:membrane; C:integral component of membrane		IPR008775 (PFAM); G3DSA:2.60.120.620 (GENE3D); PTHR31630 (PANTHER); PTHR31630:SF6 (PANTHER); SSF51197 (SUPERFAMILY)
CGI_10004717	hypothetical protein CGI_10004717	1236	0.7867	F:zinc ion binding		IPR001876 (SMART)
CGI_10015933	ADP-ribosylation factor-like	537	0.8155	F:GTP binding; P:small GTPase mediated signal transduction; P:protein transport; C:intracellular		IPR006689 (PRINTS); SM00178 (SMART); SM00177 (SMART); IPR027417 (G3DSA:3.40.50.GENE3D); IPR005225 (TIGRFAM); IPR006689 (PFAM); PTHR11711:SF142 (PANTHER); PTHR11711 (PANTHER); IPR024156 (PROSITE_PROFILES); IPR027417 (SUPERFAMILY)
CGI_10011615	lysine-specific demethylase 4B [Crassostrea gigas]	7227	0.8735	C:nucleus; F:zinc ion binding; C:integral component of membrane; F:methyltransferase activity; P:methylation		PR00011 (PRINTS); IPR003349 (SMART); IPR001965 (SMART); IPR003347 (SMART); IPR002049 (SMART); IPR000742 (SMART); IPR003347 (PFAM); IPR003349 (PFAM); G3DSA:2.170.300.10 (GENE3D); PTHR10694 (PANTHER); PTHR10694:SF48 (PANTHER); IPR003349 (PROSITE_PROFILES); IPR003347 (PROSITE_PROFILES); IPR019787 (PROSITE_PROFILES); IPR000742 (PROSITE_PROFILES); SSF51197 (SUPERFAMILY); IPR011011 (SUPERFAMILY)
CGI_10004808	transforming growth factor 2 partial	426	0.872	F:growth factor activity; C:extracellular region; P:growth
CGI_10018936	queuine tRNA-ribosyltransferase-like	1209	0.8385	P:queuosine biosynthetic process; C:cytoplasm; P:tRNA modification; F:queuine tRNA-ribosyltransferase activity	EC:2.4.2.29	IPR002616 (TIGRFAM); IPR004803 (TIGRFAM); IPR002616 (G3DSA:3.20.20.GENE3D); IPR002616 (PFAM); PTHR21148:SF22 (PANTHER); PTHR21148 (PANTHER); IPR004803 (HAMAP); IPR002616 (SUPERFAMILY)
CGI_10020393	partial [Verticillium dahliae]	669	0.8935	C:membrane		G3DSA:3.30.420.40 (GENE3D); IPR004000 (PFAM); IPR004000 (PANTHER); PTHR11937:SF237 (PANTHER); SSF53067 (SUPERFAMILY)
CGI_10027611	uracil phosphoribosyltransferase homolog	534	0.8715	F:transferase activity, transferring glycosyl groups; P:metabolic process
CGI_10028648	neutral alpha-glucosidase AB isoform X3	2805	0.7675	P:carbohydrate metabolic process; F:hydrolase activity, hydrolyzing O-glycosyl compounds; F:carbohydrate binding		IPR025887 (PFAM); IPR000322 (PFAM); PTHR22762:SF51 (PANTHER); PTHR22762 (PANTHER); SSF51011 (SUPERFAMILY); IPR017853 (SUPERFAMILY); IPR011013 (SUPERFAMILY)
CGI_10027979	TNF receptor-associated factor 6	1602	0.562	P:response to cytokine; C:intracellular organelle; F:zinc ion binding; P:cell surface receptor signaling pathway; P:anatomical structure morphogenesis; P:animal organ development; C:cytoplasmic part; P:positive regulation of intracellular signal transduction; C:plasma membrane; P:immune system process; P:positive regulation of immune system process; F:ubiquitin-protein transferase activity; P:pos…
CGI_10015724	hypothetical protein CGI_10015724	1908	0.711	C:membrane
CGI_10000942	D(2) dopamine receptor isoform X1	1413	0.4335	P:nervous system development; P:negative regulation of transport; P:positive regulation of transport; C:cell projection; P:regulation of ion transport; C:membrane-bounded organelle; F:G-protein coupled receptor activity; P:positive regulation of cellular process; P:positive regulation of multicellular organismal process; P:regulation of phosphate metabolic process; P:negative regulation of respon…		IPR000276 (PRINTS); IPR000276 (PFAM); G3DSA:1.20.1070.10 (GENE3D); IPR017452 (PROSITE_PROFILES); SSF81321 (SUPERFAMILY)
CGI_10025181	sacsin-like [Acropora digitifera]	1767	0.6795	F:structural constituent of ribosome; C:ribosome; P:translation		PTHR15600 (PANTHER); PTHR15600:SF28 (PANTHER)
CGI_10004130	gastrula zinc finger -like	1002	0.605	F:nucleic acid binding; F:metal ion binding
CGI_10019051	emopamil-binding [Tetrahymena thermophila SB210]	576	0.564	F:cholestenol delta-isomerase activity; C:integral component of membrane; P:sterol metabolic process	EC:5.3.3.5	IPR007905 (PFAM); PTHR37919:SF2 (PANTHER); PTHR37919 (PANTHER)
CGI_10020416	hypothetical protein CGI_10020416	441	0.7625			no IPS match
CGI_10022034	signal recognition particle 54 kDa	1515	0.932	F:GTP binding; P:SRP-dependent cotranslational protein targeting to membrane; C:signal recognition particle; F:GTPase activity; P:metabolic process; F:7S RNA binding		IPR003593 (SMART); IPR013822 (SMART); IPR000897 (SMART); IPR013822 (PFAM); IPR004125 (G3DSA:1.10.260.GENE3D); G3DSA:1.20.120.140 (GENE3D); IPR027417 (G3DSA:3.40.50.GENE3D); IPR004125 (PFAM); IPR000897 (PFAM); IPR006325 (TIGRFAM); PTHR11564 (PANTHER); PTHR11564:SF5 (PANTHER); IPR022941 (HAMAP); IPR027417 (SUPERFAMILY); IPR013822 (SUPERFAMILY); IPR004125 (SUPERFAMILY)
CGI_10024295	heat shock 70 kDa 12A-like [Crassostrea gigas]	1398	0.688	C:membrane; C:integral component of membrane		G3DSA:3.30.420.40 (GENE3D); IPR013126 (PFAM); G3DSA:3.30.420.40 (GENE3D); PTHR14187:SF47 (PANTHER); PTHR14187 (PANTHER); SSF53067 (SUPERFAMILY); SSF53067 (SUPERFAMILY)
CGI_10018776	Conserved oligomeric Golgi complex subunit 4	2280	0.7755	C:Golgi transport complex; P:retrograde vesicle-mediated transport, Golgi to ER; P:Golgi vesicle prefusion complex stabilization; P:Golgi organization; P:retrograde transport, vesicle recycling within Golgi
CGI_10026403	RNA exonuclease 4	783	0.7945	F:nucleic acid binding; P:nucleic acid phosphodiester bond hydrolysis; F:exonuclease activity		IPR013520 (SMART); IPR012337 (G3DSA:3.30.420.GENE3D); IPR013520 (PFAM); PTHR12801 (PANTHER); IPR012337 (SUPERFAMILY)
CGI_10023741	BCCIP homolog	852	0.67			IPR025602 (PIRSF); IPR025602 (PFAM); IPR025602 (PANTHER)
CGI_10028231	thioredoxin domain-containing 16-like	2826	0.52	C:cell; P:cell redox homeostasis		IPR012336 (G3DSA:3.40.30.GENE3D); PF13848 (PFAM); IPR013766 (PFAM); IPR012336 (G3DSA:3.40.30.GENE3D); PTHR22699 (PANTHER); PTHR22699:SF1 (PANTHER); IPR012336 (SUPERFAMILY); IPR012336 (SUPERFAMILY)
CGI_10018773	kelch 26	1860	0.6675
CGI_10021621	hypothetical protein CGI_10021621	1518	0.6291	C:integral component of membrane		IPR001368 (SMART); G3DSA:2.10.50.10 (GENE3D)
CGI_10007052	Ubiquitin-like modifier-activating enzyme 1	753	0.932	F:ATP binding; C:integral component of membrane; P:cellular protein modification process; F:small protein activating enzyme activity		IPR018965 (SMART); IPR019572 (PFAM); IPR016040 (G3DSA:3.40.50.GENE3D); IPR000594 (PFAM); IPR018965 (PFAM); PTHR10953 (PANTHER); PTHR10953:SF144 (PANTHER); IPR000594 (SUPERFAMILY)
CGI_10002646	hypothetical protein CGI_10002646	744	0.8275	F:chitin binding; P:chitin metabolic process; C:integral component of membrane; C:extracellular region
CGI_10018550	hypothetical protein CGI_10018550	267	1			no IPS match
CGI_10014573	something about silencing 10	1524	0.5955	C:nucleus; F:protein binding; P:brain development
CGI_10011043	Phosphoinositide 3-kinase adapter 1	1296	0.5505	P:phosphorylation; F:kinase activity
CGI_10016247	Group XV phospholipase A2	192	0.8867	F:O-acyltransferase activity; P:lipid metabolic process	EC:2.3.1	no IPS match
CGI_10005961	vesicle transport GOT1B-like	486	0.868	P:vesicle-mediated transport; C:integral component of membrane		IPR007305 (PFAM); PTHR21493 (PANTHER)
CGI_10027430	PREDICTED: uncharacterized protein LOC105340088 [Crassostrea gigas]	519	0.73			no IPS match
CGI_10006002	eukaryotic translation initiation factor 3 subunit L	1650	0.85	F:translation initiation factor activity; P:formation of translation preinitiation complex; C:eukaryotic 43S preinitiation complex; C:eukaryotic 48S preinitiation complex; P:regulation of translational initiation; C:eukaryotic translation initiation factor 3 complex
CGI_10008786	26S proteasome non-ATPase regulatory subunit 6	1170	0.8685	P:proteasome-mediated ubiquitin-dependent protein catabolic process; C:extracellular exosome; C:proteasome accessory complex; P:lens fiber cell differentiation		IPR000717 (SMART); SM00753 (SMART); IPR000717 (PFAM); IPR011991 (G3DSA:1.10.10.GENE3D); IPR019585 (PFAM); PTHR14145:SF1 (PANTHER); PTHR14145 (PANTHER); IPR011991 (SUPERFAMILY)
CGI_10022309	N-alpha-acetyltransferase 40	726	0.7895	P:metabolic process; F:N-acetyltransferase activity	EC:2.3.1
CGI_10011668	metabotropic glutamate receptor 1-like	2622	0.728	F:G-protein coupled receptor activity; P:G-protein coupled receptor signaling pathway; C:integral component of membrane; P:modulation of synaptic transmission; C:organelle; C:intracellular part; C:plasma membrane
CGI_10020640	desumoylating isopeptidase 1-like	1479	0.7935	P:biological_process; C:cellular_component; F:molecular_function
CGI_10018616	[Nematostella vectensis]	1224	0.6535	C:nucleus; F:transcription factor activity, sequence-specific DNA binding; F:zinc ion binding; F:metal ion binding; C:membrane; C:integral component of membrane; P:regulation of transcription, DNA-templated		PTHR35982 (PANTHER); PTHR35982:SF1 (PANTHER)
CGI_10018343	Nucleolar 11	1728	0.477	C:nucleus; P:positive regulation of transcription of nuclear large rRNA transcript from RNA polymerase I promoter; P:maturation of SSU-rRNA; P:transcription, DNA-templated; P:regulation of transcription, DNA-templated; C:t-UTP complex; P:rRNA processing; C:nucleolus; F:poly(A) RNA binding
CGI_10014276	laccase-like [Octopus bimaculoides]	2187	0.7355	F:copper ion binding; F:oxidoreductase activity; C:integral component of membrane; P:oxidation-reduction process		IPR011707 (PFAM); IPR011706 (PFAM); IPR008972 (G3DSA:2.60.40.GENE3D); IPR008972 (G3DSA:2.60.40.GENE3D); IPR001117 (PFAM); IPR008972 (G3DSA:2.60.40.GENE3D); PTHR11709 (PANTHER); PTHR11709:SF77 (PANTHER); IPR008972 (SUPERFAMILY); IPR008972 (SUPERFAMILY); IPR008972 (SUPERFAMILY)
CGI_10020939	stabilizer of axonemal microtubules 2-like	1308	0.4855			IPR033336 (PANTHER)
CGI_10022765	UMP-CMP kinase mitochondrial	507	0.727	C:nucleus; F:uridylate kinase activity; P:nucleotide phosphorylation; P:pyrimidine deoxyribonucleotide biosynthetic process; P:nucleoside triphosphate biosynthetic process; P:pyrimidine deoxyribonucleoside diphosphate biosynthetic process; C:cytoplasmic part	EC:2.7.4
CGI_10006413	spliceosome RNA helicase DDX39B isoform X1	1461	0.9585	F:peptide antigen binding; C:nuclear speck; C:spliceosomal complex; C:transcription export complex; P:cellular response to DNA damage stimulus; P:antigen processing and presentation of peptide antigen via MHC class I; C:U6 snRNP; F:ATP-dependent protein binding; P:spliceosomal complex assembly; C:U4 snRNP; C:MHC class I protein complex; F:ATP-dependent RNA helicase activity; F:poly(A) RNA binding…
CGI_10023389	proteasome subunit alpha type-5-like	813	0.8225	C:nucleus; C:cytoplasm; C:proteasome core complex, alpha-subunit complex; F:threonine-type endopeptidase activity; P:ubiquitin-dependent protein catabolic process	EC:3.4.25	IPR000426 (SMART); IPR001353 (PFAM); IPR029055 (G3DSA:3.60.20.GENE3D); IPR029055 (G3DSA:3.60.20.GENE3D); IPR000426 (PFAM); PTHR11599:SF14 (PANTHER); PTHR11599 (PANTHER); IPR023332 (PROSITE_PROFILES); IPR029055 (SUPERFAMILY); IPR029055 (SUPERFAMILY)
CGI_10023429	coilin	1419	0.5795	C:nucleus
CGI_10021863	Annexin A7	972	0.826	P:cellular chemical homeostasis; P:negative regulation of coagulation; C:cytoplasmic part; C:intracellular organelle part; F:calcium-dependent phospholipid binding; P:translation; C:nucleus; F:RNA binding; F:protein binding; C:bounding membrane of organelle; F:calcium ion binding; C:endomembrane system; C:vesicle		IPR001464 (PRINTS); IPR002392 (PRINTS); IPR018502 (SMART); IPR018502 (G3DSA:1.10.220.GENE3D); IPR018502 (G3DSA:1.10.220.GENE3D); IPR018502 (G3DSA:1.10.220.GENE3D); IPR018502 (PFAM); PTHR10502 (PANTHER); SSF47874 (SUPERFAMILY)
CGI_10012365	leucine aminopeptidase	1590	0.9915	C:cytoplasm; P:proteolysis; F:metalloexopeptidase activity; F:aminopeptidase activity; F:manganese ion binding	EC:3.4.11
CGI_10013060	A disintegrin and metallo ase with thrombospondin motifs gon-1-like	756	0.6467	F:zinc ion binding; P:proteolysis; F:metalloendopeptidase activity	EC:3.4.24
CGI_10015616	dual specificity phosphatase 3-like [Crassostrea gigas]	603	0.7255	F:protein tyrosine phosphatase activity; P:peptidyl-tyrosine dephosphorylation; F:protein tyrosine/serine/threonine phosphatase activity	EC:3.1.3.48; EC:3.1.3
CGI_10025615	RNA-binding with serine-rich domain partial	747	0.7905	F:nucleotide binding		IPR012677 (G3DSA:3.30.70.GENE3D); PTHR15481 (PANTHER); IPR012677 (SUPERFAMILY)
CGI_10024397	PREDICTED: uncharacterized protein LOC105341803 [Crassostrea gigas]	1476	1	C:integral component of membrane		no IPS match
CGI_10009201	Spore cortex-lytic enzyme	1383	0.7725	P:metabolic process; F:hydrolase activity
CGI_10022567	PGAP2-interacting isoform X1	2079	0.6695	C:integral component of membrane
CGI_10017506	notchless homolog 1-like	1476	0.8435	P:Notch signaling pathway; P:somitogenesis; P:kidney development; P:ribosomal large subunit biogenesis; P:hematopoietic stem cell homeostasis; P:positive regulation of canonical Wnt signaling pathway; P:inner cell mass cell differentiation; P:negative regulation of mitotic cell cycle; C:nucleolus; P:skeletal system morphogenesis; P:negative regulation of cysteine-type endopeptidase activity invol…
CGI_10004809	hypothetical protein CGI_10004809	324	0.9267
CGI_10017404	Myb-binding 1A	3552	0.542	F:DNA binding; F:DNA-directed DNA polymerase activity; P:transcription, DNA-templated; P:DNA biosynthetic process	EC:2.7.7.7
CGI_10013938	translation machinery-associated 16	597	0.678	P:biological_process; C:nucleus; C:nucleolus; C:cellular_component; F:molecular_function		IPR021346 (PFAM); PTHR13349 (PANTHER)
CGI_10014585	flocculation FLO10-like [Crassostrea gigas]	1053	0.7395	C:membrane; C:viral capsid
CGI_10026671	sulfite oxidase-like	5301	0.8525	F:oxidoreductase activity; P:ion transmembrane transport; F:molybdenum ion binding; C:integral component of membrane; F:extracellular ligand-gated ion channel activity; P:oxidation-reduction process; F:heme binding; F:molybdopterin cofactor binding; P:nitrate assimilation
CGI_10020419	U3 small nucleolar RNA-associated 6 homolog	675	0.6805	C:preribosome; P:RNA processing; C:nucleolus		IPR003107 (SMART); IPR011990 (G3DSA:1.25.40.GENE3D); IPR013949 (PFAM); PTHR23271 (PANTHER); IPR011990 (SUPERFAMILY)
CGI_10023759	exosome complex component RRP45-like	2487	0.787	F:RNA binding; P:nuclear-transcribed mRNA catabolic process; C:nuclear lumen; C:intracellular non-membrane-bounded organelle; P:RNA processing; P:nuclear RNA surveillance; C:exosome (RNase complex)		IPR013830 (G3DSA:3.40.50.GENE3D); IPR001247 (PFAM); IPR015847 (PFAM); IPR027408 (G3DSA:3.30.230.GENE3D); PTHR11097 (PANTHER); IPR033100 (PTHR11097:PANTHER); IPR033100 (PTHR11097:PANTHER); PTHR11097 (PANTHER); IPR020568 (SUPERFAMILY); IPR020568 (SUPERFAMILY); IPR015847 (SUPERFAMILY); IPR013830 (SUPERFAMILY)
CGI_10019732	vacuole membrane 1	1107	0.7025	C:intracellular membrane-bounded organelle; C:integral component of membrane; C:cytoplasmic part; P:single-organism cellular process; P:organelle organization; P:endomembrane system organization		PTHR10281:SF1 (PANTHER); PTHR10281 (PANTHER)
CGI_10002474	hypothetical protein CGI_10002474	207	1
CGI_10019439	Sodium-dependent phosphate transport 2B	1794	0.7205	F:sodium-dependent phosphate transmembrane transporter activity; P:sodium-dependent phosphate transport; C:integral component of membrane; P:phosphate ion transmembrane transport
CGI_10008300	dCTP pyrophosphatase 1-like	864	0.817	P:biological_process; C:cellular_component
CGI_10016438	signal transducing adapter molecule 1-like	2235	0.779	P:intracellular protein transport; C:intracellular		IPR001452 (PRINTS); IPR001452 (SMART); IPR002014 (SMART); IPR003903 (SMART); G3DSA:2.30.30.40 (GENE3D); IPR002014 (PFAM); IPR003903 (PFAM); IPR008942 (G3DSA:1.25.40.GENE3D); IPR001452 (PFAM); PTHR13856:SF96 (PANTHER); PTHR13856 (PANTHER); IPR002014 (PROSITE_PROFILES); IPR001452 (PROSITE_PROFILES); IPR003903 (PROSITE_PROFILES); IPR008942 (SUPERFAMILY); IPR001452 (SUPERFAMILY)
CGI_10008502	transmembrane 189-like	843	0.821	C:integral component of membrane
CGI_10024186	elongation factor Tu GTP-binding domain-containing 1 [Xenopus tropicalis]	3342	0.736	F:GTP binding; F:translation elongation factor activity; F:GTPase activity; P:translational elongation
CGI_10018501	rhotekin-like isoform X1	1491	0.763	P:signal transduction
CGI_10025064	all-trans-retinol 13,14-reductase	1863	0.722	F:oxidoreductase activity; C:integral component of membrane; F:kinesin binding; C:kinesin complex; P:oxidation-reduction process		IPR023753 (G3DSA:3.50.50.GENE3D); PF13450 (PFAM); PTHR10668 (PANTHER); PTHR10668:SF61 (PANTHER); IPR023753 (SUPERFAMILY)
CGI_10026193	proto-oncogene c-Fos-like isoform X2	807	0.735	C:nucleus; F:transcription factor activity, sequence-specific DNA binding; F:sequence-specific DNA binding; P:regulation of transcription from RNA polymerase II promoter		IPR000837 (PRINTS); IPR004827 (SMART); IPR004826 (PFAM); G3DSA:1.20.5.170 (GENE3D); IPR000837 (PANTHER); IPR004827 (PROSITE_PROFILES); SSF57959 (SUPERFAMILY)
CGI_10027623	hypothetical protein CGI_10027623	561	1
CGI_10007423	WD repeat-containing 3	2793	0.769	C:small-subunit processome; P:maturation of SSU-rRNA from tricistronic rRNA transcript (SSU-rRNA, 5.8S rRNA, LSU-rRNA); C:nuclear membrane; F:snoRNA binding; C:Pwp2p-containing subcomplex of 90S preribosome; C:nucleoplasm; F:poly(A) RNA binding		IPR020472 (PRINTS); IPR001680 (SMART); IPR015943 (G3DSA:2.130.10.GENE3D); IPR015943 (G3DSA:2.130.10.GENE3D); IPR007148 (PFAM); IPR015943 (G3DSA:2.130.10.GENE3D); IPR001680 (PFAM); PTHR19853 (PANTHER); PTHR19853:SF0 (PANTHER); IPR017986 (PROSITE_PROFILES); IPR001680 (PROSITE_PROFILES); IPR011047 (SUPERFAMILY); IPR017986 (SUPERFAMILY)
CGI_10013563	hypothetical protein CGI_10013563	204	0.7094			G3DSA:2.10.25.10 (GENE3D); SSF57196 (SUPERFAMILY)
CGI_10028338	eukaryotic translation initiation factor 5B-like	987	0.96
CGI_10004633	PREDICTED: uncharacterized protein LOC105341968 [Crassostrea gigas]	1041	0.555
CGI_10015462	25-hydroxyvitamin D-1 alpha mitochondrial	1629	0.63	P:response to organic substance; P:regulation of cellular process; F:iron ion binding; F:oxidoreductase activity, acting on paired donors, with incorporation or reduction of molecular oxygen; P:oxidation-reduction process; F:monooxygenase activity; F:heme binding
CGI_10024885	LIM domain kinase 1 isoform X2	2499	0.8125	F:ATP binding; F:zinc ion binding; F:protein kinase activity; P:protein phosphorylation		IPR001478 (SMART); IPR001781 (SMART); G3DSA:1.10.510.10 (GENE3D); G3DSA:3.30.200.20 (GENE3D); IPR001478 (G3DSA:2.30.42.GENE3D); IPR001781 (G3DSA:2.10.110.GENE3D); IPR000719 (PFAM); IPR001781 (G3DSA:2.10.110.GENE3D); IPR001478 (PFAM); IPR001781 (PFAM); PTHR23257 (PANTHER); PTHR23257:SF398 (PANTHER); IPR000719 (PROSITE_PROFILES); IPR001478 (PROSITE_PROFILES); IPR001781 (PROSITE_PROFILES); SSF57716 …
CGI_10019068	CUE domain-containing 1-like	1059	0.681			PTHR13467 (PANTHER)
CGI_10018964	U5 small nuclear ribonucleo 200 kDa helicase	6276	0.867	F:ATP binding; F:identical protein binding; C:catalytic step 2 spliceosome; C:membrane; C:U5 snRNP; P:osteoblast differentiation; C:viral nucleocapsid; C:nucleoplasm; F:ATP-dependent RNA helicase activity; F:poly(A) RNA binding; P:mRNA splicing, via spliceosome
CGI_10020641	Transducin beta 3	3321	0.746	C:small-subunit processome; P:maturation of SSU-rRNA from tricistronic rRNA transcript (SSU-rRNA, 5.8S rRNA, LSU-rRNA); F:snoRNA binding; C:Pwp2p-containing subcomplex of 90S preribosome
CGI_10010241	cholecystokinin receptor-like [Crassostrea gigas]	1683	0.551	F:G-protein coupled receptor activity; P:G-protein coupled receptor signaling pathway; C:integral component of membrane		IPR000276 (PRINTS); IPR000276 (PFAM); G3DSA:1.20.1070.10 (GENE3D); PTHR24242 (PANTHER); PTHR24242:SF98 (PANTHER); IPR017452 (PROSITE_PROFILES); SSF81321 (SUPERFAMILY)
CGI_10006813	MFS-type transporter SLC18B1-like	1086	0.5195	P:transmembrane transport; C:membrane; C:integral component of membrane		G3DSA:1.20.1250.20 (GENE3D); PTHR23506 (PANTHER); PTHR23506:SF2 (PANTHER); IPR020846 (SUPERFAMILY)
CGI_10013799	Importin-5	3243	0.801	C:nuclear membrane; C:cytoplasm; P:protein import into nucleus, translocation; P:NLS-bearing protein import into nucleus; F:protein transporter activity; C:nuclear periphery; F:Ran GTPase binding; P:protein import into nucleus, docking; F:nuclear localization sequence binding; P:ribosomal protein import into nucleus		PF13513 (PFAM); IPR011989 (G3DSA:1.25.10.GENE3D); PTHR10527 (PANTHER); PTHR10527:SF22 (PANTHER); IPR021133 (PROSITE_PROFILES); IPR016024 (SUPERFAMILY)
CGI_10022559	Y+L amino acid transporter 2 [Trichinella pseudospiralis]	1440	0.7505	C:integral component of membrane; F:amino acid transmembrane transporter activity; P:amino acid transmembrane transport
CGI_10006273	fragile X mental retardation syndrome-related 1-like isoform X2	1029	0.787	F:RNA binding		IPR004087 (SMART); IPR004088 (G3DSA:3.30.1370.GENE3D); IPR004088 (PFAM); PTHR10603 (PANTHER); IPR008395 (PROSITE_PROFILES); IPR004088 (PROSITE_PROFILES); IPR004088 (SUPERFAMILY); IPR004088 (SUPERFAMILY)
CGI_10007411	hypothetical protein CGI_10007411	558	0.995
CGI_10004885	complement component 1 Q subcomponent-binding mitochondrial-like	885	0.6045	C:mitochondrial matrix
CGI_10021907	[Monosiga brevicollis MX1]	744	0.5295	P:L-arabinose metabolic process; P:polysaccharide catabolic process; P:cell communication; F:calcium ion binding; C:membrane; C:integral component of membrane; F:alpha-L-arabinofuranosidase activity; P:homophilic cell adhesion via plasma membrane adhesion molecules; F:carbohydrate binding		IPR001368 (SMART); G3DSA:2.10.50.10 (GENE3D); IPR001368 (PFAM); IPR001368 (PROSITE_PROFILES)
CGI_10008964	TNF receptor-associated factor 2	4764	0.6975	F:zinc ion binding; P:signal transduction; P:regulation of intracellular signal transduction; C:cell part; P:regulation of apoptotic process; C:protein complex; P:positive regulation of signal transduction; F:ubiquitin-protein transferase activity; P:positive regulation of molecular function; P:positive regulation of macromolecule metabolic process; C:membrane; P:positive regulation of cellular m…
CGI_10023491	homeobox TGIF2-like isoform X2	693	0.84	C:nucleus; F:DNA binding; C:integral component of membrane; P:regulation of transcription, DNA-templated		IPR001356 (SMART); IPR009057 (G3DSA:1.10.10.GENE3D); IPR008422 (PFAM); PTHR11850 (PANTHER); PTHR11850:SF68 (PANTHER); IPR001356 (PROSITE_PROFILES); IPR009057 (SUPERFAMILY)
CGI_10027046	coactosin [Crassostrea gigas]	429	0.7635	F:actin binding; C:intracellular
CGI_10005017	hypothetical protein CGI_10005017	312	0.925
CGI_10018874	NF-kappa-B-repressing factor	1986	0.5935	F:nucleic acid binding
CGI_10011104	E3 ubiquitin- ligase TRIM56	2772	0.516	F:zinc ion binding; C:intracellular		IPR000315 (SMART); IPR001841 (SMART); IPR011042 (G3DSA:2.120.10.GENE3D); IPR000315 (PFAM); IPR013083 (G3DSA:3.30.40.GENE3D); IPR000315 (G3DSA:4.10.45.GENE3D); PTHR24103:SF331 (PANTHER); PTHR24103 (PANTHER); IPR000315 (PROSITE_PROFILES); IPR001841 (PROSITE_PROFILES); SSF57850 (SUPERFAMILY); SSF101898 (SUPERFAMILY); SSF57845 (SUPERFAMILY)
CGI_10023130	THUMP domain-containing partial	1629	0.6485	F:RNA binding
CGI_10023809	KAT8 regulatory NSL complex subunit 2-like isoform X1 [Crassostrea gigas]	1386	0.6795	P:histone H4 acetylation; F:H4 histone acetyltransferase activity; C:histone acetyltransferase complex		IPR025927 (PFAM); PTHR13453:SF1 (PANTHER); IPR026316 (PANTHER)
CGI_10018669	ETS domain-containing Elk-4-like isoform X2 [Biomphalaria glabrata]	1134	0.8495	C:nucleus; P:cell differentiation; F:sequence-specific DNA binding; F:RNA polymerase II transcription factor activity, sequence-specific DNA binding; P:regulation of transcription from RNA polymerase II promoter		IPR000418 (PRINTS); IPR000418 (SMART); IPR011991 (G3DSA:1.10.10.GENE3D); IPR000418 (PFAM); PTHR11849 (PANTHER); PTHR11849:SF133 (PANTHER); IPR000418 (PROSITE_PROFILES); IPR011991 (SUPERFAMILY)
CGI_10025571	VWFA and cache domain-containing 1	1422	0.7295	C:integral component of membrane		IPR002035 (SMART); G3DSA:3.30.450.20 (GENE3D); IPR002035 (G3DSA:3.40.50.GENE3D); IPR002035 (PFAM); PTHR10166:SF37 (PANTHER); PTHR10166 (PANTHER); IPR002035 (PROSITE_PROFILES); IPR002035 (SUPERFAMILY)
CGI_10020686	methyltransferase C9orf114 homolog	1116	0.8025	P:biological_process; C:cellular_component; F:molecular_function		IPR003750 (PFAM); IPR029026 (G3DSA:3.40.1280.GENE3D); PTHR12150:SF13 (PANTHER); IPR003750 (PANTHER); IPR029028 (SUPERFAMILY); IPR012340 (SUPERFAMILY)
CGI_10009434	NADH dehydrogenase [ubiquinone] complex assembly factor 7	1701	0.724	P:chordate embryonic development		IPR011989 (G3DSA:1.25.10.GENE3D); IPR003788 (PFAM); IPR003788 (PANTHER); PTHR12049:SF7 (PANTHER); IPR016024 (SUPERFAMILY); IPR029063 (SUPERFAMILY)
CGI_10018640	Toll-like receptor 1	945	0.639	P:signal transduction
CGI_10024300	cyclic nucleotide-binding domain-containing 2-like	2133	0.767			IPR000595 (SMART); IPR000595 (PFAM); IPR014710 (G3DSA:2.60.120.GENE3D); PTHR23011:SF8 (PANTHER); PTHR23011 (PANTHER); IPR000595 (PROSITE_PROFILES); IPR018490 (SUPERFAMILY); IPR018490 (SUPERFAMILY)
CGI_10015014	signal peptidase complex subunit 3-like	540	0.835	C:integral component of membrane; P:signal peptide processing; F:peptidase activity; C:signal peptidase complex
CGI_10001437	Multiple epidermal growth factor-like domains 10	450	0.7955	C:integral component of membrane		no IPS match
CGI_10027276	heat shock 70 kDa 12B-like [Crassostrea gigas]	1758	0.6365	F:nucleotide binding; F:ATP binding; C:membrane; C:integral component of membrane		G3DSA:3.30.420.40 (GENE3D); G3DSA:3.30.420.40 (GENE3D); PTHR14187:SF47 (PANTHER); PTHR14187 (PANTHER); SSF53067 (SUPERFAMILY); SSF53067 (SUPERFAMILY)
CGI_10026023	DNA topoisomerase 1-like	2817	0.8855	F:DNA binding; C:viral nucleocapsid; F:DNA topoisomerase type I activity; C:chromosome; F:DNA topoisomerase type II (ATP-hydrolyzing) activity; P:DNA topological change	EC:5.99.1.3; EC:5.99.1.2	IPR001631 (PRINTS); IPR013499 (SMART); IPR014711 (G3DSA:3.90.15.GENE3D); IPR013500 (PFAM); IPR013034 (G3DSA:1.10.10.GENE3D); IPR013030 (G3DSA:2.170.11.GENE3D); IPR008336 (PFAM); IPR025834 (PFAM); IPR014727 (G3DSA:1.10.132.GENE3D); PTHR10290 (PANTHER); SSF46596 (SUPERFAMILY); IPR011010 (SUPERFAMILY); IPR008336 (SUPERFAMILY)
CGI_10002310	glutamyl-tRNA(Gln) amidotransferase subunit mitochondrial	1533	0.7695	F:ATP binding; C:glutamyl-tRNA(Gln) amidotransferase complex; P:glutaminyl-tRNAGln biosynthesis via transamidation; C:mitochondrion; P:mitochondrial translation; F:transferase activity; F:glutaminyl-tRNA synthase (glutamine-hydrolyzing) activity	EC:6.3.5.7	IPR023631 (PFAM); IPR023631 (G3DSA:3.90.1300.GENE3D); IPR000120 (PANTHER); PTHR11895:SF7 (PANTHER); IPR004412 (HAMAP); IPR023631 (SUPERFAMILY)
CGI_10026986	very long-chain acyl- synthetase-like [Crassostrea gigas]	2331	0.6895	P:long-chain fatty acid metabolic process; P:proteolysis; F:cysteine-type endopeptidase activity; P:fatty acid biosynthetic process; F:long-chain fatty acid-CoA ligase activity	EC:3.4.22; EC:6.2.1.3	G3DSA:3.40.50.980 (GENE3D); IPR000873 (PFAM); G3DSA:3.40.50.980 (GENE3D); IPR029030 (G3DSA:3.40.50.GENE3D); G3DSA:3.30.300.30 (GENE3D); PF00656 (PFAM); G3DSA:2.30.38.10 (GENE3D); IPR025110 (PFAM); PTHR24096 (PANTHER); IPR030310 (PTHR24096:PANTHER); IPR001309 (PROSITE_PROFILES); SSF56801 (SUPERFAMILY); IPR029030 (SUPERFAMILY)
CGI_10001615	pelota [Drosophila melanogaster]	1146	0.8965	P:nucleic acid phosphodiester bond hydrolysis; P:spindle assembly involved in male meiosis I; P:mitotic nuclear division; P:meiotic G2/MI transition; P:translation; P:nuclear-transcribed mRNA catabolic process, non-stop decay; C:nucleus; P:female germ-line stem cell asymmetric division; P:spermatocyte division; C:cytoplasm; F:metal ion binding; P:compound eye morphogenesis; P:meiotic nuclear enve…		IPR005140 (SMART); IPR004405 (TIGRFAM); IPR005140 (PFAM); IPR005142 (PFAM); IPR005141 (PFAM); IPR029064 (G3DSA:3.30.1330.GENE3D); IPR004405 (PANTHER); SSF53137 (SUPERFAMILY); SSF159065 (SUPERFAMILY); IPR029064 (SUPERFAMILY)
CGI_10008420	ubiquinone biosynthesis COQ7 homolog	588	0.813	P:oxidation-reduction process; P:ubiquinone biosynthetic process
CGI_10009677	26S proteasome non-ATPase regulatory subunit 7-like	984	0.9315	P:cell proliferation; C:dendrite; P:mitotic spindle elongation; P:proteasome-mediated ubiquitin-dependent protein catabolic process; P:neurogenesis; C:proteasome regulatory particle, lid subcomplex		IPR000555 (SMART); IPR024969 (PFAM); IPR000555 (PFAM); PTHR10540 (PANTHER); PTHR10540:SF7 (PANTHER)
CGI_10021733	chorion peroxidase-like	2550	0.684	F:peroxidase activity; P:response to oxidative stress; P:cellular oxidant detoxification; P:oxidation-reduction process; F:heme binding	EC:1.11.1.7
CGI_10008963		18129
CGI_10011744	DDI1 homolog 2 isoform X1	1362	0.7205	F:aspartic-type endopeptidase activity; P:proteolysis	EC:3.4.23
CGI_10020732	endoplasmic reticulum-Golgi intermediate compartment 2-like	1038	0.659	C:intracellular membrane-bounded organelle; C:integral component of membrane; C:cytoplasmic part
CGI_10011015	Metallo ase inhibitor 3	348	0.6205	P:negative regulation of endopeptidase activity; F:metalloendopeptidase inhibitor activity		IPR001820 (PFAM); G3DSA:2.40.50.120 (GENE3D); IPR008993 (SUPERFAMILY)
CGI_10023585	hypothetical protein CGI_10023585	270	1			no IPS match
CGI_10020769	ERGIC-53	1524	0.706	C:integral component of membrane		IPR013320 (G3DSA:2.60.120.GENE3D); IPR005052 (PFAM); PTHR12223 (PANTHER); PTHR12223:SF8 (PANTHER); IPR005052 (PROSITE_PROFILES); IPR013320 (SUPERFAMILY)
CGI_10008019	signal peptidase complex subunit 2	735	0.8215	C:integral component of membrane; P:signal peptide processing; F:peptidase activity; C:signal peptidase complex
CGI_10009579	PREDICTED: uncharacterized protein LOC105318885 isoform X1 [Crassostrea gigas]	753	0.95	C:integral component of membrane
CGI_10027438	zygote arrest 1-like	450	0.6215			IPR027377 (SMART); IPR027377 (PFAM); IPR026775 (PANTHER); PTHR31054:SF5 (PANTHER)
CGI_10003648	integrin beta A	573	0.5545	C:membrane		no IPS match
CGI_10004193	receptor-type tyrosine- phosphatase T-like	2889	0.7185	F:protein tyrosine phosphatase activity; P:peptidyl-tyrosine dephosphorylation	EC:3.1.3.48
CGI_10007124	hypothetical protein CGI_10007124	219	0.971	F:ATP binding; P:glycerol-3-phosphate metabolic process; C:glycerol-3-phosphate dehydrogenase complex; F:sn-glycerol-3-phosphate:ubiquinone-8 oxidoreductase activity; P:oxidation-reduction process	EC:1.1.5.3	no IPS match
CGI_10003120	arginine N-methyltransferase 5-like	1956	0.7775	P:cell proliferation; P:endothelial cell activation; F:protein-arginine omega-N symmetric methyltransferase activity; P:peptidyl-arginine methylation, to symmetrical-dimethyl arginine; P:positive regulation of adenylate cyclase-inhibiting dopamine receptor signaling pathway; C:Golgi apparatus; P:histone H4-R3 methylation; F:methyl-CpG binding; P:negative regulation of nucleic acid-templated trans…
CGI_10004563	ribosome-binding 1-like isoform X5 [Crassostrea gigas]	3177	0.85	C:integral component of membrane
CGI_10017655	hypothetical protein CGI_10017655	321	1
CGI_10021624	Threonine dehydratase biosynthetic	1113	0.6413	C:membrane; C:integral component of membrane		IPR001368 (SMART); G3DSA:2.10.50.10 (GENE3D)
CGI_10004798	membrane-attack complex perforin domain-containing [Eimeria acervulina]	837	0.6095	F:ATP binding; C:membrane; C:integral component of membrane; F:protein kinase activity; P:protein phosphorylation
CGI_10012540	CAAX prenyl protease 1 homolog	1374	0.778	P:CAAX-box protein processing; C:integral component of membrane; F:metalloendopeptidase activity	EC:3.4.24
CGI_10000733	UPF0160 mitochondrial	372	0.84			IPR003226 (PFAM); IPR003226 (PANTHER); PTHR11215:SF1 (PANTHER)
CGI_10017253	U3 small nucleolar RNA-associated 15 homolog	1560	0.721	P:rRNA processing; C:nucleolus		IPR020472 (PRINTS); IPR001680 (SMART); IPR001680 (PFAM); IPR018983 (PFAM); IPR015943 (G3DSA:2.130.10.GENE3D); PTHR19924:SF26 (PANTHER); PTHR19924 (PANTHER); IPR017986 (PROSITE_PROFILES); IPR001680 (PROSITE_PROFILES); IPR017986 (SUPERFAMILY)
CGI_10017953	Prostaglandin E2 receptor EP4 subtype	1227	0.6365	P:G-protein coupled receptor signaling pathway; C:integral component of membrane		G3DSA:1.20.1070.10 (GENE3D); IPR008365 (PANTHER); PTHR11866:SF17 (PANTHER); IPR017452 (PROSITE_PROFILES); SSF81321 (SUPERFAMILY); SSF81321 (SUPERFAMILY)
CGI_10016855	F-box LRR-repeat 6-like	864	0.5855			IPR032675 (G3DSA:3.80.10.GENE3D); PTHR24006 (PANTHER); SSF52047 (SUPERFAMILY)
CGI_10007167	armadillo repeat-containing 6-like [Crassostrea gigas]	1398	0.6625
CGI_10013731	PREDICTED: uncharacterized protein LOC105340663 isoform X1 [Crassostrea gigas]	1092	0.7629
CGI_10018492	Beta-1,3-galactosyltransferase brn	1062	0.6135	C:integral component of membrane; P:protein glycosylation; F:galactosyltransferase activity; C:Golgi apparatus	EC:2.4.1	IPR002659 (PFAM); IPR002659 (PANTHER)
CGI_10021429	BET1 homolog	324	0.7055	C:membrane
CGI_10007800	Tripartite motif-containing 2	975	0.632	C:integral component of membrane		no IPS match
CGI_10011558	proteasome subunit beta type-7-like	828	0.857	C:nucleus; C:cytoplasm; C:proteasome core complex; F:threonine-type endopeptidase activity; P:proteolysis involved in cellular protein catabolic process	EC:3.4.25	IPR000243 (PRINTS); IPR024689 (PFAM); IPR029055 (G3DSA:3.60.20.GENE3D); IPR001353 (PFAM); PTHR11599:SF42 (PANTHER); PTHR11599 (PANTHER); IPR023333 (PROSITE_PROFILES); IPR029055 (SUPERFAMILY)
CGI_10010679	myb X [Crassostrea gigas]	351	1			no IPS match
CGI_10010925	Y+L amino acid transporter 2	1599	0.7965	C:integral component of membrane; F:amino acid transmembrane transporter activity; P:amino acid transmembrane transport		IPR002293 (PIRSF); IPR002293 (PFAM); IPR002293 (PANTHER); PTHR11785:SF145 (PANTHER)
CGI_10020906	NAD-dependent deacetylase Sirt6-like [Biomphalaria glabrata]	1167	0.643	F:NAD+ binding		IPR003000 (PFAM); IPR026591 (G3DSA:3.30.1600.GENE3D); IPR029035 (G3DSA:3.40.50.GENE3D); PTHR11085:SF20 (PANTHER); IPR003000 (PANTHER); IPR026590 (PROSITE_PROFILES); IPR029035 (SUPERFAMILY)
CGI_10019340	Three prime repair exonuclease 1	738	0.638	F:nucleic acid binding		IPR003582 (SMART); G3DSA:2.20.100.10 (GENE3D); IPR003582 (PROSITE_PROFILES); IPR000884 (SUPERFAMILY)
CGI_10025918	Collagen alpha-1(IV) chain	936	0.6154	C:collagen trimer		IPR008160 (PFAM); PTHR24023 (PANTHER); PTHR24023:SF563 (PANTHER)
CGI_10007736	ATPdependent DNA ligase domain containing [Acanthamoeba castellanii Neff]	1479	0.6855	P:DNA ligation involved in DNA repair; F:ATP binding; F:DNA ligase (ATP) activity; P:DNA recombination	EC:6.5.1.1
CGI_10017952	Prostaglandin E2 receptor EP4 subtype	636	0.6405	P:G-protein coupled receptor signaling pathway; C:integral component of membrane		G3DSA:1.20.1070.10 (GENE3D); IPR008365 (PANTHER); PTHR11866:SF17 (PANTHER); IPR017452 (PROSITE_PROFILES); SSF81321 (SUPERFAMILY)
CGI_10024298	PCTP	798	0.7255	F:lipid binding		IPR002913 (SMART); IPR023393 (G3DSA:3.30.530.GENE3D); IPR002913 (PFAM); PTHR19308 (PANTHER); PTHR19308:SF14 (PANTHER); IPR002913 (PROSITE_PROFILES); SSF55961 (SUPERFAMILY)
CGI_10024861	transcription factor	453	0.7785	C:nucleus; P:transcription from RNA polymerase II promoter; F:transcriptional activator activity, RNA polymerase II transcription regulatory region sequence-specific binding; F:sequence-specific DNA binding; P:positive regulation of transcription from RNA polymerase II promoter
CGI_10026858	baculoviral IAP repeat-containing 7	1311	0.6235	F:zinc ion binding; P:regulation of cellular process; C:intracellular part
CGI_10027972	Ribosome production factor 1	978	0.8345	P:maturation of 5.8S rRNA; P:maturation of LSU-rRNA; F:rRNA primary transcript binding; C:nucleolus; P:ribosomal large subunit assembly; C:preribosome, large subunit precursor; F:poly(A) RNA binding
CGI_10015562	glutamyl-tRNA(Gln) amidotransferase subunit mitochondrial	1437	0.793	F:nucleotide binding; C:glutamyl-tRNA(Gln) amidotransferase complex; P:glutaminyl-tRNAGln biosynthesis via transamidation; C:mitochondrion; P:mitochondrial translation; F:transferase activity; F:glutaminyl-tRNA synthase (glutamine-hydrolyzing) activity	EC:6.3.5.7	IPR015943 (G3DSA:2.130.10.GENE3D); IPR006075 (PFAM); PTHR11659:SF0 (PANTHER); IPR017959 (PANTHER); IPR017986 (SUPERFAMILY); SSF55931 (SUPERFAMILY)
CGI_10021706	multiple coagulation factor deficiency 2 isoform X1 [Mandrillus leucophaeus]	1308	0.7925	C:endoplasmic reticulum membrane; F:hydrolase activity, acting on ester bonds; F:calcium ion binding; C:ER to Golgi transport vesicle membrane; C:Golgi membrane; P:protein N-linked glycosylation via asparagine; C:endoplasmic reticulum-Golgi intermediate compartment membrane; P:COPII vesicle coating
CGI_10020092	Endonuclease exonuclease phosphatase family domain-containing 1	1755	0.6855	P:nucleic acid phosphodiester bond hydrolysis; F:exonuclease activity; F:endonuclease activity
CGI_10010239	Chorion peroxidase	1563	0.702	F:peroxidase activity; P:response to oxidative stress; P:cellular oxidant detoxification; P:oxidation-reduction process; F:heme binding	EC:1.11.1.7	IPR019791 (PRINTS); IPR019791 (G3DSA:1.10.640.GENE3D); IPR019791 (PFAM); PTHR11475 (PANTHER); IPR019791 (PROSITE_PROFILES); IPR010255 (SUPERFAMILY)
CGI_10017489	[Nematostella vectensis]	3168	0.6086
CGI_10014846	phosphoribosylformylglycinamidine synthase	3879	0.7925	F:ATP binding; C:cytoplasm; P:'de novo' IMP biosynthetic process; P:glutamine metabolic process; F:phosphoribosylformylglycinamidine synthase activity	EC:6.3.5.3
CGI_10025448	phosphatidylinositol transfer alpha isoform-like	447	0.8055	P:metabolic process; F:transferase activity; P:transport; P:single-organism process; C:intracellular		IPR001666 (PFAM); IPR023393 (G3DSA:3.30.530.GENE3D); IPR001666 (PANTHER); SSF55961 (SUPERFAMILY)
[truncated: 26,364 more rows]
